# Supplementary material for: The Gain and Loss of Cryptochrome/Photolyase Family Members during Evolution
Source: MDPI journal article supplement (doi:10.3390/genes13091613), 2022-09-08

# 6-4 PL

1. Acanthaster pal XP\_022085333.1 cry-2-like
2. Acanthopagrus latu XP\_03695201.1
3. 4. Acipenser tur XP\_03358753.2
4. Acropora digiti XP\_015758632.1
5. 5. Acropora millep XP\_029185027.1
6. Actinia ten XP\_031549143.1 cry-1-like
7. Acyrtosiphon pal XP\_019460121.1 cry-2
8. Agrius pal XP\_018321938.1 cry-2\_X1
9. Albugo can CC14315.1 unnamed\_pr
10. Albulus glos KAG9351737.1
11. Alliuma fusc CAG7824192.1
12. Alligator miss XP\_006275625.1
13. Alligator sinu XP\_006021416.1 cry-1-like
14. Allomyces mac KNE59778.1 AMAG\_05242
15. Aloia sapi XP\_041961620.1
16. Amborella tri XP\_006419051.1 (6-4)DNA\_p
17. Amia calu MBN33040548.1
18. Amphibalanus apu KAF9300247.1 cry-1
19. Amphiphion ocel XP\_023153353.1
20. Anabailurus grah ROL54170.1
21. Anabas test XP\_026234836.1
22. Ananas com XP\_020089433.1 (6-4)DNA\_p
23. Anhinga anhi NX78835.1
24. Anolis car XP\_00325762.1 cry-1
25. Anthromys caro XP\_010173836.1
26. Antronomus euc KAF073358.1 Ae201684\_0
27. Aplysia cal XP\_035828705.1 cry-1
28. Apostichopus jap PIK41746.1 6-4\_photol
29. Aquila cry chrysaetes XP\_029878270.1
30. Arachidopsis th XP\_566520.1 DNA\_photol
31. Araneus ven GBM6789.1 cry-1
32. Archocentrus cent XP\_030577901.1
33. Asterias rub XP\_033643654.1 cry-1-like
34. Astyanax mexi KAG568225.1
35. Atractosteus spat MBN331803.1
36. Aureococcus ano XP\_009033826.1 AURANDRAFT
37. Balaniceps rex NX505437.1
38. Bathycoccus pra XP\_007514096.1 protein
39. Battallia atru KAG5702948.1
40. Bemisia tab XP\_018904762.1 cry-2
41. Betta spl XP\_029000458.1 cry\_circad
42. Bifliguratus ade OZ01509.1 BZG36\_0555
43. Biophalarial gl XP\_013065770.1 cryptochro
44. Boleophthalmus pect XP\_020797397.1
45. Bombyx mor XP\_037874830.1 cry-1
46. Brachionus caly CAF9591683.1
47. Brachionus plic RN42711.1
48. Bradysia copu XP\_037041975.1 cry-1-like
49. Brema lac TDH74364.1 CCR75\_0094
50. Bufo bufo XP\_040287471.1
51. Bulinus turu KAH9490127.1
52. Cafeteria roe KAA0161729.1 FN3F1\_0367
53. Calidris pugn XP\_014816511.1
54. Calonectris bore NXV3746.1
55. Callinipoda pos DAC31551.1 TPA1\_photol
56. Capaspora mae XP\_004349794.2 photolase
57. Caranx mela KAG7224414.1
58. Catenaria ang ORZ315468.1 FAD\_bindin
59. Chaetura pela KFU85512.1
60. Channa argu KAF3686229.1
61. Chanos chano XP\_030647938.1
62. Chara braunii GBG80215.1
63. Chondarilus voc XP\_00889134.1
64. Chelinus undu XP\_041648513.1
65. Chelmon rostr XP\_04179864.1
66. Chelonis mydas XP\_037738454.1
67. Chilo sap QCH40574.1 CRY1\_X1
68. Chionoecetes opu KAG0728005.1 cry-1
69. Chlamydomonas rei XP\_001698054.1 cry\_photor
70. Chlorella soru PRW58875.1 LVR3\_3lik
71. Chloritron pui QDZ19548.1 cry/DNA\_ph
72. Chondrus cri XP\_005718107.1 cry\_photol
73. Chrysochrominia tur KOO31536.1 6-4\_photol
74. Chrysoperla cam XP\_044742491.1
75. Chytridiomycos can TPX68125.1 CccB567573
76. Ciconia magu NXJ33658.1
77. Circatopus cent NXW13967.1
78. Cloen dip CAB3366165.1 protein
79. Clupea haru CRL02690.1 CLUMA\_C601
80. Clupea hare XP\_042562756.1
81. Colocasia esc MQM065101.1 Taru\_03933
82. Colossoma macr XP\_036460149.1
83. Coregonus sap CAB132867.1 unnamed\_pr
84. Coryphaenoides ruu KAG7271508.1
85. Crassostrea gig XP\_01144696.2 cry\_1\_X1
86. Crassostrea virg XP\_02235390.1
87. Crocodilus por XP\_019402505.1 cry-2-like
88. Cryptochromin cu QD056149.1 6-4\_photol
89. Cucurbita mos XP\_022095952.1 (6-4)DNA\_p
90. Cyandiodococcus yan KAF604024.1 cry-2
91. Cynoglossus semi XP\_024911595.1
92. Cyprinodon vari XP\_015227078.1
93. Danaus pleu QW81955.1 KGM\_210113
94. Danio reru XP\_005155462.1 cry\_circad
95. Daphnia mag XP\_032708065.1 cry-2-like
96. Daphnia pulu ERX5418.1 DNA\_photol
97. Dendrobium cat XP\_020686619.1 (6-4)DNA\_p
98. Denticeps clup XP\_02883111.1
99. Dinotherium tiri RW510201.1 cry-2-like
100. Dinorhynchus mel BAA12067.1 photolase
101. Dryodora glau AQX17841.1 putative\_p
102. Dunalialia sal AAX56342.1 6-4\_photol
103. Echeineus sal XP\_029353429.1
104. Ectocarpus sil CBJ30497.1 cry-1
105. Egretta garz XP\_03575346.1
106. Elysia chi RUS76899.1 EGW08\_0153
107. Emiliaia hux XP\_006767880.1 putative\_C
108. Engystomias pust KAG858157.1
109. Ephemera dan KAF4518708.1 (6-4)phot
110. Erioprepis dila XP\_020666189.1 cry-1-like
111. Esox luc XP\_034149143.1 cry\_circad
112. Euplakamii dan AQX17844.1 putative\_p
113. Euryarchaeta arc MBQ60325.1 CMA66\_0727
114. Eurydice palu AGV28818.1 6-4\_photol
115. Euryptera hux XP\_010146875.1
116. Eurytemora aff XP\_023343983.1 cry-1-like
117. Euxalpia dia XP\_020915067.1 cry-1\_X1
118. Falco cry XP\_027658934.1
119. Fittuliferu cent GAX23745.1 cry
120. Fragilariopsis opy OEU16302.1 FAD\_bindin
121. Frankliniella oec KAE874724.1 6-4\_photol
122. Fulmarus glac XP\_005980326.1
123. Fundulus heter XP\_012724022.2
124. Gadus moru XP\_030233889.1
125. Galdieria sul XP\_005706285.1 photolase
126. Gammarus pici XP\_043953409.1
127. Garra andu AYN44210.1
128. Gavia stel XP\_009817663.1
129. Gavialis gan XP\_019364513.1 cry-2-like
130. Gloeobacteri sil WP\_032172734.1 DNA\_photol
131. Gonapodya por KXS17061.1 cry\_photol
132. Gouania mae XP\_028328938.1
133. Gracilariopsis cu PX464629.1 (6-4)DNA\_p
134. Gymnodraco actu XP\_03408101.1
135. Halioitis rubr XP\_046546140.1
136. Helicoverpa arm XP\_021188646.1 cry-1
137. Hemiprocne coma NXG65597.1
138. Hermetia sil XP\_037903861.1 LOW\_QUALIT
139. Hermisenda chra ANX11209.1 6-4\_photol
140. Herpetotheres ca WWK08244.1
141. Himantopus hima NXN69851.1
142. Hippocampus sten XP\_035020365.1
143. Homarus ame KAG7617638.1 cry-2-like
144. Hondaea fer GBG27575.1 cry-1
145. Hyemolepis dim VDL61458.1 unnamed\_pr
146. Indicator macu NXN16040.1
147. Ichthyura eleg XP\_04034167.1
148. Ictiormordium sil KAG91785.1 photolase
149. Labrus berg XP\_020513567.1
150. Ladona fulv KAG823196.1
151. Lampae lac AQX17843.1 putative\_p
152. Larimichthys croc XP\_010755355.2
153. Lasallia pus KAA6407800.1 cry-2
154. Lateolabrax macu UBK24604.1
155. Lates cal XP\_018522462.1
156. Lepeophtheirus sal XP\_040573653.1 (6-4)DNA\_p
157. Lepisosteus cu XP\_00642290.2 cry-2-like
158. Limulus pal XP\_022247971.1 cry-2-like
159. Lingula ana XP\_013384159.1 cry-1-like
160. Lingulodinium pol QD016378.1 6-4\_photol
161. Lithobates caru P1014260.1 AB205\_0057
162. Lophium mae KAF766419.1
163. Lophium mae KAF766419.1
164. Lottia gig XP\_009045182.1 LOT1GDRAFT
165. Lytechia fide KAF766419.1
166. Lytechia fide KAF766419.1
167. Malus dom XP\_018522462.1
168. Marchantia pal PTQ32765.1 MARPO\_0095
169. Marine Gro OIR17544.1 BD0935\_0505
170. Mastacembelus arm XP\_002618955.1
171. Mauremys test XP\_044852759.1
172. Maylandia zebr XP\_004539639.2
173. Megalops cipa XP\_036379574.1 cry\_circad
174. Melanotaenia pax XP\_041847736.1
175. Melitae lea AWY11210.1 6-4\_photol
176. Meridia menl KAG58193.1
177. Mercenaria merc XP\_045176200.1
178. Micromonas com XP\_002508785.1 protein
179. Micropterus dolo XP\_045889012.1
180. Micropterus salu XP\_038557715.1
181. Misgurnus angu BBH18600.1
182. Monopterus albu XP\_020445661.1
183. Monosiga bre XP\_001747506.1 uncharacte
184. Morone sax XP\_035507976.1
185. Musca dom XP\_005182773.1 cry-1
186. Myrtilaris murd XP\_029904240.1
187. Mytilus edul XP\_02520086.1
188. Mytilus gallior VDL6070.1 cryptochro
189. Nanorana par XP\_018240471.1 cry-1-like
190. Nemastella vecu XP\_032241878.1 cry-1
191. Nephila pili GFT22944.1
192. Nethobacterium furz XP\_015808759.1
193. Nectibius gran NXQ8569.1
194. Neocentrus ang NXF53842.1
195. Ocanodroma teth NXH74094.1
196. Ocanodroma teth NXH74094.1
197. Oculichthys mac KAG817630.1
198. Oncorhynchus gorb XP\_046160399.1
199. Optilabea hae XP\_00115581.1 DCG3\_0805
200. Orbiatella fax XP\_020529231.1 cry-1
201. Orchestella sil OND95388.1 cry-2
202. Oryza sat XP\_015623929.1 (6-4)DNA\_p
203. Oryzias lat XP\_004067451.1 cry-1
204. Oryzias lat XP\_004150891.1
205. Ostreococcus tau XP\_022838904.1 DNA\_photol
206. Owenia fusi CAC961788.1
207. Pandion haliu NXS73800.1
208. Parachitichthys pal XP\_019935864.1
209. Parambasis rang XP\_028257055.1
210. Parastoda pect XP\_015913173.1
211. Patella min XP\_038063798.1
212. Pecten max XP\_033752615.1 LOW\_QUALIT
213. Pelicanoides uru NX34709.1
214. Pelodiscus sin XP\_025039663.1 LOW\_QUALIT
215. Penaeus mon XP\_037792441.1
216. Penaeus van ROT83202.1 putative\_c
217. Penicillium subu OKP02382.1 cry-1
218. Periophthalmus mae XP\_033845754.1
219. Phaeodactylum tri XP\_002180095.1 cry\_photol
220. Phaethon lept XP\_010281210.1
221. Physcomitrium pal XP\_024361046.1 (6-4)DNA\_p
222. Picea sil ABR16130.1 unknown
223. Pimephales prom XP\_039533080.1
224. Plakobranchus oel GFO20945.1
225. Platanostrotium ful PRP73543.1 PROFUN\_0205
226. Plasmodium falu XP\_024571475.1 DNA\_photol
227. Platynereis dum AGX93015.1
228. Platysternon megalcephalum TFK06320.1 suppressor
229. Plectropomus pal XP\_042341943.1
230. Pluteella xy XP\_037961567.1 cry-1
231. Pocillopora dam XP\_027043718.1 cry-1-like
232. Podilymbus podi NXL54180.1
233. Pollicipes polu XP\_037072142.1
234. Polyodon sarp MBN328108.1
235. Polypterus sene XP\_039620008.1
236. Pomacea canalic XP\_025115306.1 cryptochro
237. Porphyra umbilic OXK72831.1
238. Porphyridium furu KAA8497133.1 (6-4)DNA\_p
239. Portunus tritulu XP\_045118530.1 cryptochro
240. Powellomys cry TPX58791.1 PhCB580983
241. Protomyces lac XP\_004277966.1 DNA\_photol
242. Prototenus anae XP\_043936748.1
243. Pseudo-nitzschia mel VEU36641.1 unnamed\_pr
244. Puccinia str KNF06174.1 PSTG\_00683
245. Pseudamillia nery XP\_00573345.1
246. Pungitius pung XP\_037307515.1
247. Pygocentrus nati XP\_037403264.1
248. Pythium oil TMW57503.1 Pol338472\_
249. Rhizoclostium ORY50797.1
250. Rhizoctonia sil CEL59601.1 cry-2\_OS-G
251. Rhynchospirium agr CSZ99641.1 related\_to
252. Rodentolopis nam VDO14864.1 unnamed\_pr
253. Rozella all RKP18286.1 ROZALSICDR
254. Rynchospora nige NXN52096.1
255. Sagittaria serp NXQ94764.1
256. Salarias fasc XP\_029552200.1
257. Salpingoeca ros XP\_004959002.1 DNA\_photol
258. Salvelinus alpi XP\_023867825.1
259. Sander luci XP\_031170258.1
260. Scatophagus argu XP\_046237517.1
261. Schistocephalus soli VDL97200.1
262. Schistocerca greg XP\_0259240.1 cry-2
263. Sclerorhynchus for XP\_018566655.2
264. Scophthalmus maxi XP\_035484982.1
265. Scopus umbr NXK59662.1
266. Selaginella sel XP\_025450344.1 (6-4)DNA\_p
267. Seniolia lala dorsalis XP\_023267685.1
268. Sinerpica chua XP\_044047054.1
269. Solanum lyc XP\_02452323.1 (6-4)DNA\_p
270. Soleda sene KAG7481848.1
271. Sparganium por VZ11874.1 unnamed\_pr
272. Sparus auru XP\_030271124.1
273. Sphaeromaria cri XP\_02986647.1 SARC\_05172
274. Sphaeromaria cri XP\_02986647.1 SARC\_05172
275. Sphaeromaria cri XP\_02986647.1 SARC\_05172
276. Sporisorium sil CDW98027.1
277. Stegastes paru XP\_008267779.1
278. Stereodonium sil XP\_035217620.1 cry-1-like
279. Stercorarius pra NXG93853.1
280. Strongylocentrotus pur XP\_030853363.1 cry-2\_X2
281. Stylonychia lem CDW779133.1 cry-5
282. Stylonychia pal XP\_022808227.1 cry-1-like
283. Sula dact NW291937.1
284. Symblodinium mae XP\_03959575.1 UVR3
285. Syngnathus mriu XP\_031024772.1
286. Syngnathus mriu XP\_031024772.1
287. Syngnathus mriu XP\_031024772.1
288. Syrrhaptes para NXT21444.1
289. Takifugu rubr XP\_011670950.1
290. Tarrapene carolina triunguis XP\_024065412.1 cryptochro
291. Tetraodon sacu PNH010276.1 (6-4)DNA\_p
292. Tetraodon nigr XP\_04023575.1
293. Thalassiosira oec EJK58421.1 THAO\_2145
294. Thalassiosira oec EJK58421.1 THAO\_2145
295. Thecamonas tra XP\_03754232.1 cry\_photor
296. Thrinacosaurus orbi NXQ02785.1
297. Thrips pal XP\_034230704.1 cry-2\_X1
298. Thunnus macu XP\_04225043.1
299. Tigriopus latu TRYG67619.1 TCAI\_04907
300. Tilletia ind KAE823025.1 CF326\_2637
301. Timema gen CAD7588414.1 unnamed pr
302. Timema gen CAD72052.1 unnamed pr
303. Toxotes jacu XP\_040898972.1
304. Trematomus pax KAA62400.1 6-4\_photol
305. Trematomus bern XP\_03992501.1
306. Tremella mes RKX3731.1 M231\_05455
307. Tritonia tel AWY11211.1 6-4\_photol
308. Uria aelu XP\_0424607.1
309. Verrucimicrobia bac NBU8599.1 EB513\_0151
310. Vexillum paru AQX17843.1 putative\_p
311. Vitrella tra CEM04076.1 unnamed\_pr
312. Walleria ichthy XP\_002861843.1
313. Xenopus lae XP\_001083121.1 6-4\_photol
314. Xiphias gladi XP\_040011325.1
315. Xiphophorus macu XP\_023187633.1
316. Xylonia hux XP\_018189085.1 cry-2
317. Zootoca vivipar XP\_034955129.1

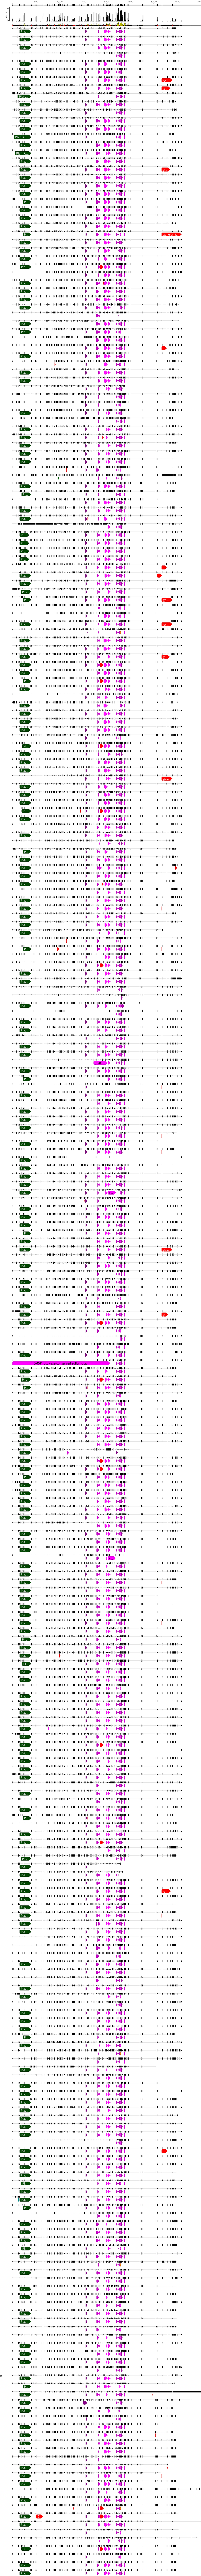

# ACRY

1. *Acropora dig* XP\_015773600.1
2. *Acropora mil* ABP97099.1 cry\_CRY2,\_
3. *Actinia ten* XP\_031550954.1 cry-2-like
4. *Exaiptasia dia* KXJ19326.1 cry-1
5. *Nematostella vec* XP\_032235657.1 cry-2
6. *Orbicella fav* XP\_020612047.1 cry-1-like
7. *Pocillopora dam* XP\_027060408.1 uncharacte
8. *Stylophora pis* XP\_022794023.1 uncharacte

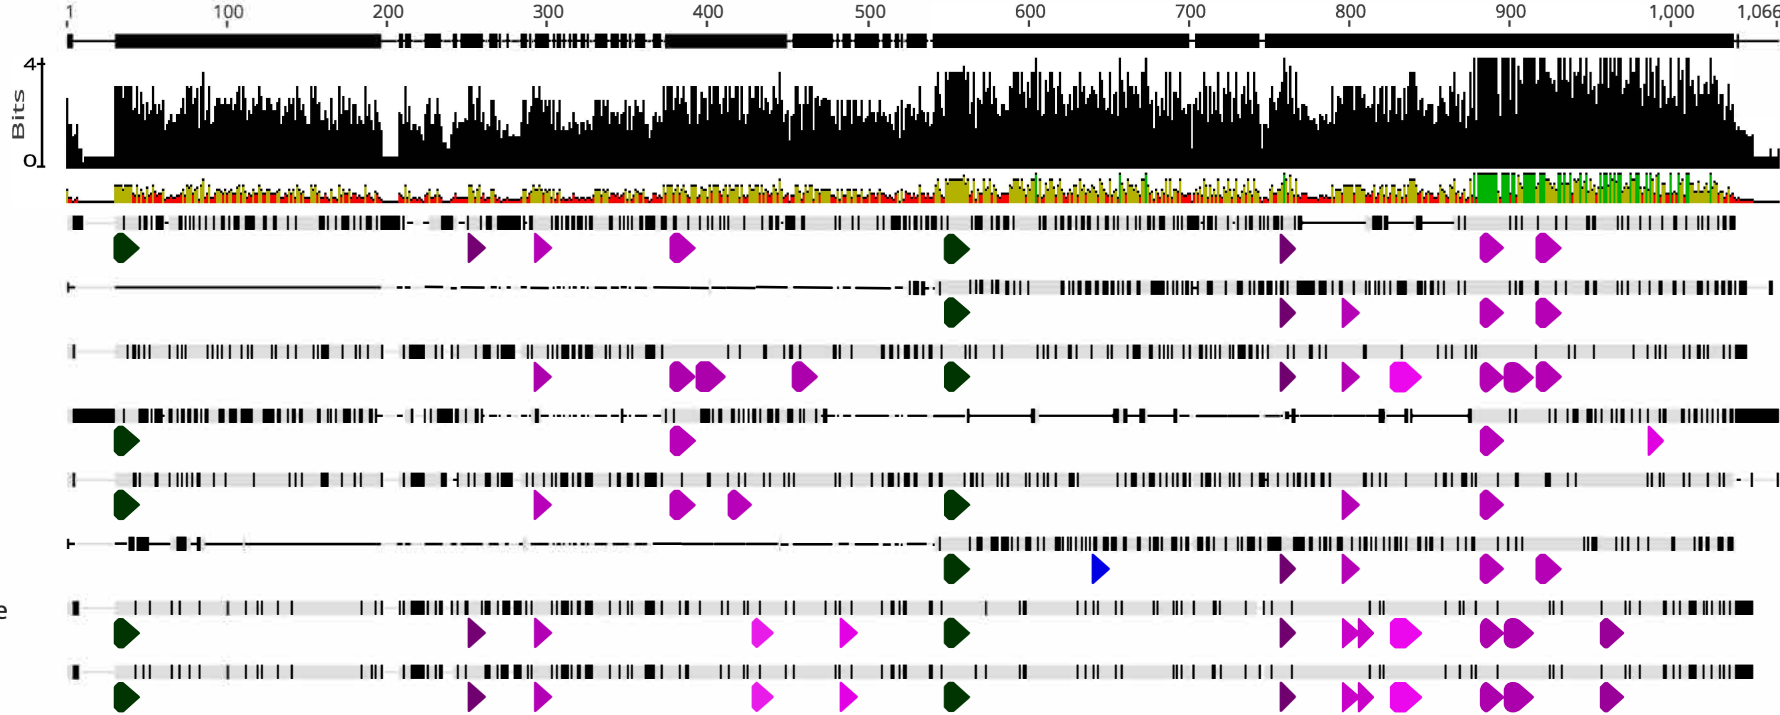

# CPDIII

1. Alkalihalobacillus sha WP\_059102964.1 DNA\_photol
2. Allomyces macro KNE55283.1
3. Armillaria ost SJL01787.1 uncharacte
4. Arthrospira pla WP\_014276518.1 photolyase
5. Basidiobolus mer ORX97314.1 DNA\_photol
6. Bifiguratus ade OZJ06231.1 BZG36\_0080
7. Bodo sal CUG86883.1 photolyase
8. Catenaria ang ORZ37966.1 DNA\_photol
9. Chloracidobacterium the WP\_058868137.1 DNA\_photol
10. Chytriomycetes con TPX75854.1 CcCBS67573
11. Colwellia psy WP\_011042217.1 photolyase
12. Dermatophagoides pte XP\_027196527.1 uncharacte
13. Dimargaris cri RKP40130.1 DNA\_photol
14. Escherichia col WP\_001583322.1 photolyase
15. Euroglyphus may OTF77403.1 photolyase
16. Gloeobacter kil WP\_023172026.1
17. Gonapodya pro KXS11844.1 M427DRAFT\_
18. Halobacillus sp. KGW1 WP\_062514897.1
19. Halobacterium hub WP\_059056769.1 DNA\_photol
20. Hyalella azt XP\_018013167.1 deoxyribod
21. Ichthyophthirius mul XP\_004037245.1 IMG5\_05753
22. Lasallia pustul KAA6416131.1
23. Leishmania inf XP\_001468129.1 putative\_D
24. Leptomonas pyr XP\_015655211.1 putative\_p
25. Lophium myt KAF2488308.1 photolyase
26. Nematostella vec XP\_032236034.1 photolyase
27. Neurospora cra XP\_964834.2 photolyase
28. Nitrosopumilus sp. RMW33708.1 photolyase
29. Nitrospira len WP\_121988866.1 DNA\_photol
30. Oikopleura dio CBY34235.1 unnamed\_pr
31. Oppiella nov CAD7637253.1 unnamed pr
32. Paramicrosporidium sac PJF19504.1 DNA\_photol
33. Penicillium sub OKP10124.1 photolyase
34. Perkinsus sp. TEB20199.1 C9890\_0096
35. Piptocephalis cyl RKP13396.1 photolyase
36. Planoprotostelium fun PRP75200.1 PROFUN\_159
37. Powellomyces hir TPX58310.1 PhCBS80983
38. Protomyces lac XP\_040727286.1 FAD\_bindin
39. Puccinia str KNE96768.1 PSTG\_09905
40. Rhizoclostratium glo ORY43053.1 putative\_p
41. Rhizoctonia sol CAE6534518.1 unnamed\_pr
42. Rhynchosporium agr CZT06608.1 probable\_p
43. Rozella all EPZ35776.1 DNA\_photol
44. Saccharomyces cer GAX67612.1 photolyase
45. Salmonella ent GAS74637.1 photolyase
46. Sarcoptes sca KAF7493271.1 Deoxyribod
47. Sporisorium sci CDR99981.1 protein
48. Strigomonas cul EPY22251.1 photolyase
49. Synchytrium mic XP\_031023209.1 uncharacte
50. Synechococcus sp. MBC8169373.1
51. Synechocystis sp. ALJ69418.1 photolyase
52. Taphrina def CCG80991.1 putative\_p
53. Tetrabaena soc PNH04446.1 photo-lyas
54. Tetrahymena the XP\_001015321.1 DNA\_photol
55. Tilletia ind KAE8232765.1 CF326\_g219
56. Tremella mesent XP\_007007703.1
57. Trichuris tri CDW57984.1 photolyase
58. Verrucomicrobia bac NCW27700.1 photolyase
59. Vibrio cho WP\_148537779.1 photolyase
60. Wallemia ich XP\_009266014.1 photolyase
61. Xylona hev XP\_018189979.1 CDP\_photol

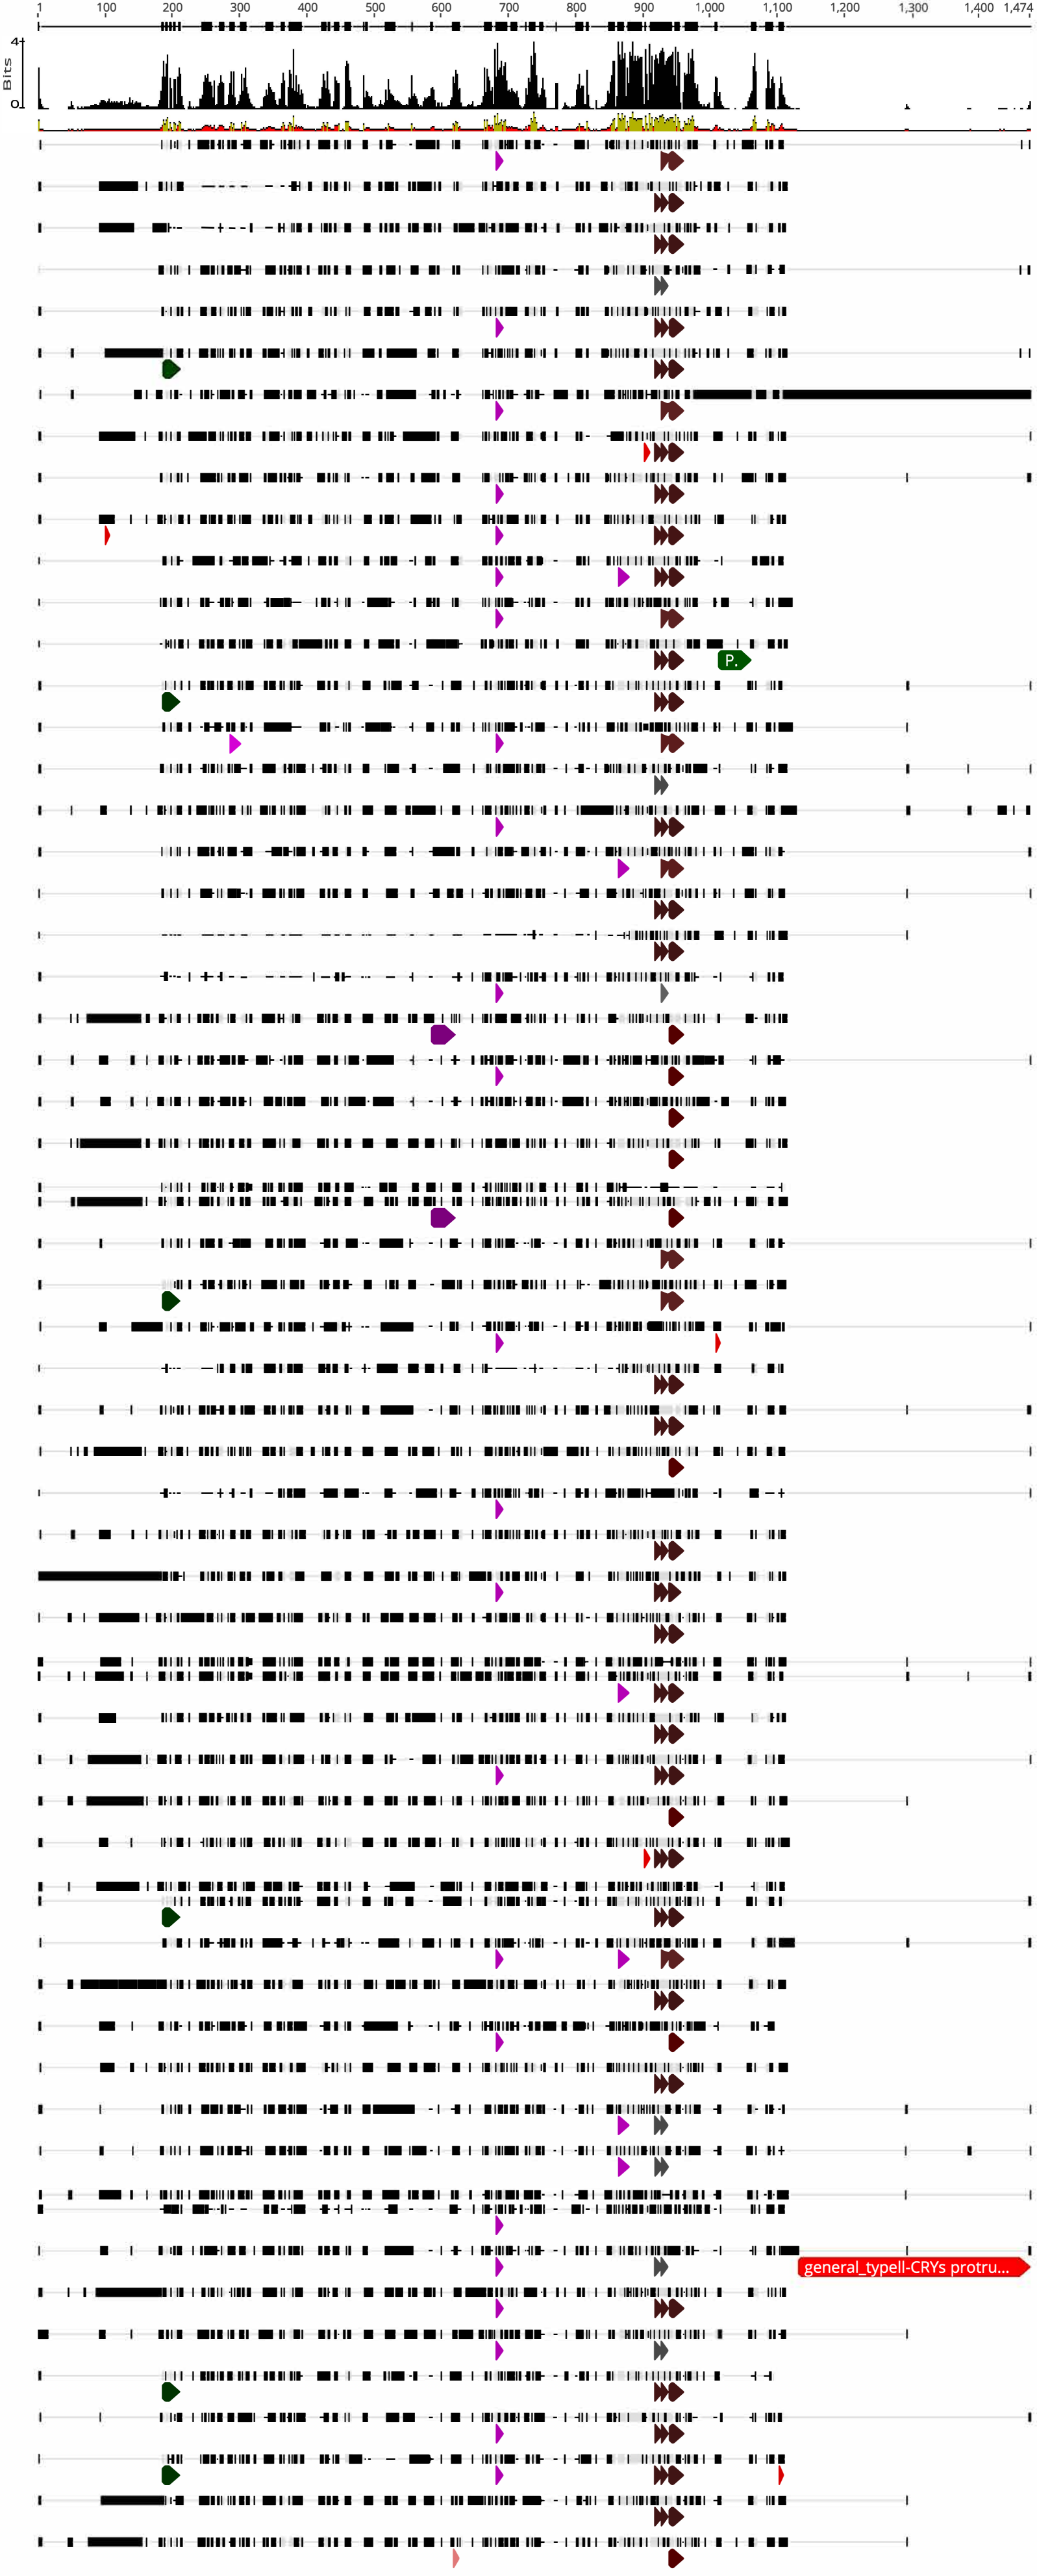

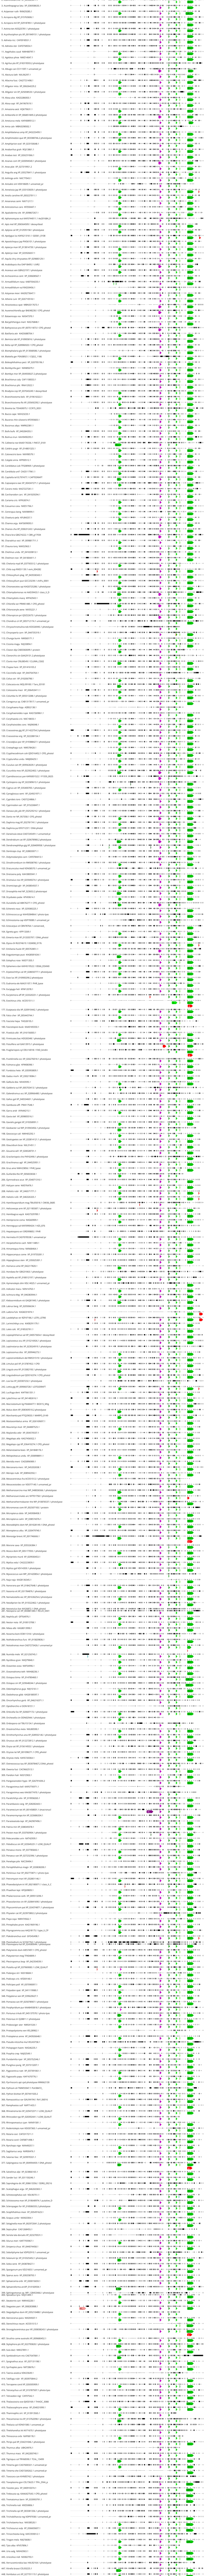

# CPDI

1. *Agrobacterium fab* WP\_174020122.1 DNA\_photol

2. *Biomphalaria gla* XP\_013089589.1

3. *Euryarchaeota arc* MBF56040.1 photolyase

4. *Hyphobacterium ind* WP\_109260360.1 DNA\_photol

5. *Lepeophtheirus sal* XP\_040565695.1 deoxyribod

6. *Nymphon str* KAG1657147.1 Deoxyribod

7. *Ostreococcus tau* OUS44591.1

8. *Sphingomonas sp.* RZM33948.1 photolyase

9. *Trichoplax adh* XP\_002108560.1

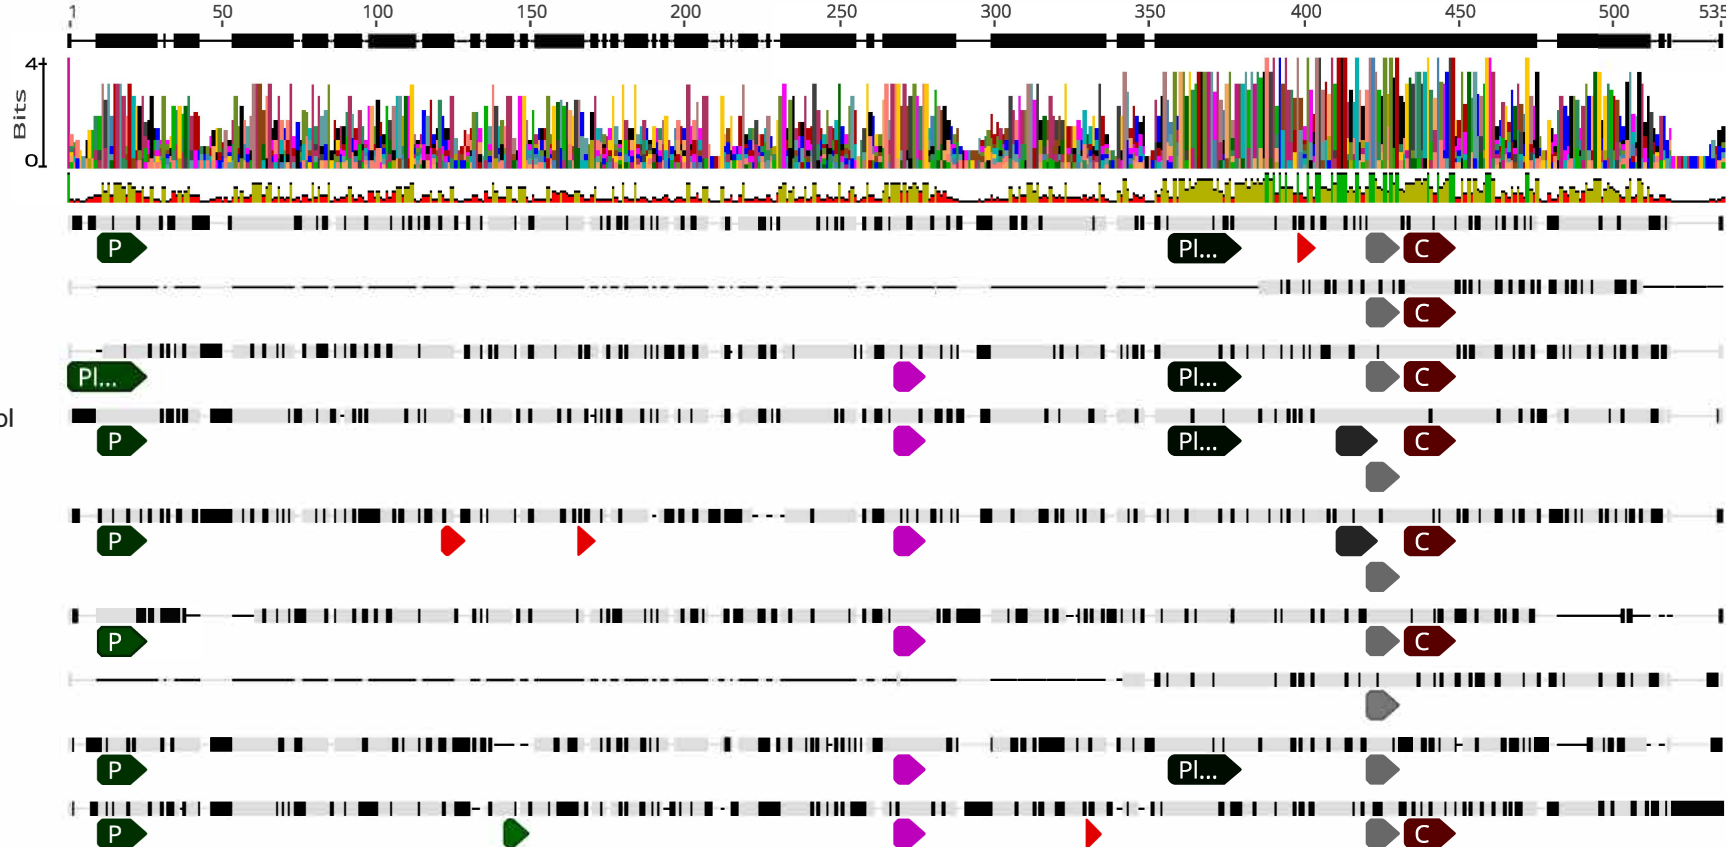

# CRY4

- Aegithalos caud NWH87675.1
- Agelaius phoe NWZ06291.1
- Albula glos KAG9353080.1
- Alectura lath NXL85365.1
- Alopecoenas bec NXW86659.1 CRY1
- Alosa alos KAG5274603.1
- Alosa sapi XP\_041944778.1
- Amia calv MBN3303333.1
- Anabailius grah ROL43523.1
- Anas plat XP\_027300846.1
- Anguilla ang XP\_035242993.1 cry\_circad
- Anhinga anhi NXC78071.1
- Anolis caroline XP\_008108122.1
- Anseranas semi NXI73871.1
- Antrostomus caro XP\_010162591.1
- Apaloderma vitt XP\_009864284.1
- Apteryx man XP\_013799507.1 LOW\_QUALIT
- Apteryx rowi XP\_025919553.1
- Aquila chry chrysaetos XP\_029856377.1
- Aramus guar NXO48908.1
- Athene cuni XP\_026720170.1
- Atractosteus spat MBN3324451.1
- Balaeniceps rex NXS44423.1
- Baryphthengus mart NXG68295.1
- Bombycilla garr NXN90577.1
- Branchiostoma belc XP\_019620932.1
- Branchiostoma floridae XP\_035688923.1 cryptochro
- Bucco cape NXH19275.1
- Calidris pugn XP\_014801760.1
- Calonectris bore NXV89335.1
- Cariama cris XP\_009696013.1
- Casuaris casu NXE54110.1
- Centropus beng NXN99936.1
- Chaetura pela XP\_009992545.1
- Chanos cha XP\_030634406.1 cry-1-like
- Charadrius vocl XP\_009879608.1
- Chauna torq NXK56767.1
- Chelonia myd EMP41017.1 cry-1
- Chlamydotis macq XP\_010116266.1
- Chloroceryle aene NXI52898.1
- Chunga burm NWS56972.1
- Ciconia magu NXJ34657.1
- Circaetus pect NXW19350.1
- Clupea hare XP\_031423160.1
- Colius stri XP\_010202269.1
- Colossoma macr XP\_036415715.1
- Columba liv XP\_005510394.1 cry-1
- Coregonus sp. ' CAB1354074.1
- Corythacla cris NXC19319.1
- Corythaoides conc NXJ95526.1
- Crotophaga sulc NWS78782.1
- Crypturellus undu NWJ00893.1
- Cuculus can XP\_009557709.1 cry-1-like
- Cygnus atr XP\_035425030.1 cry-1-like
- Danio rerio XP\_005168334.1
- Denticeps clup XP\_028853227.1
- Dromaius novaehollandiae XP\_025957051.1 cryptochro
- Dryobates pube XP\_009894705.1
- Egretta garz XP\_009632356.1
- Engystomops pust KAG8589654.1
- Eudromia ele NXA43208.1 CRY1\_
- Eurypyga heli XP\_010145866.1
- Falco cher XP\_027672562.1
- Ficedula albi XP\_005059365.1
- Fulmarus glac XP\_009575143.1
- Galbula dea NXI34715.1
- Gallus gallus XP\_040508605.1 cryptochro
- Garra andr ADL62684.1
- Gavia stel XP\_009813817.1
- Geococcyx cali NWH62918.1
- Grus ame NWH19278.1 CRY1
- Halcyon sene NXD88195.1
- Hemiprocne coma NXG64473.1
- Herpetotheres cach NXK11544.1
- Himantopus hima NXN66078.1
- Indicator macu NXN16223.1
- Lepisosteus ocu XP\_006628580.1
- Leptosomus disc XP\_009951143.1
- Mauremys muti XP\_044870701.1
- Megalops atla KAG7477630.1
- Megalops cyprin XP\_036386825.1
- Merops nubi XP\_008947701.1
- Misgurnus angu BBI18601.1
- Nestor nota XP\_010017836.1
- Numida mele XP\_021232797.1
- Nyctibius gran NXQ83460.1
- Oceanites ocea NXF45918.1
- Oceanodroma teth NXH75833.1
- Odontophorus guja NXJ03486.1
- Pandion halli NXS77093.1
- Pelecanoides urin NXT33719.1
- Pelodiscus sinensis XP\_006115758.1 cryptochro
- Penelope pile NXC41228.1
- Phaethon lept XP\_010288559.1
- Phalacrocorax carb XP\_009513466.1
- Phoenicopterus rube ruber KFQ77349.1
- Playa caya NWH71253.1
- Pimephales prom XP\_039538549.1
- Platysternon megacephalum TFK00652.1 Cryptochro
- Podargus stri NXQ23758.1
- Podiceps cris KFZ58887.1
- Podilymbus podi NXL53871.1
- Psophia crep NXJ00149.1
- Pygocentrus natt XP\_017540798.1
- Pygoscelis papu KAF1442024.1
- Ramphastos sulf XP72287.1
- Rhinopomastus cyan NXN98048.1
- Rynchops nige NXN49677.1
- Sagittarius serp NXR01154.1
- Scleropages for XP\_029114945.1
- Scopus umbr NXS55203.1
- Spheniscus mend KAF1420273.1
- Spizaetus tyra NXJ47120.1
- Stercorarius para NXG86034.1
- Struthio came australis XP\_009665590.1
- Sula dact NWI33849.1
- Terrapene car XP\_024073555.1 cry-1-like
- Thinocorus orbi NXP02623.1
- Tricholaema leuc NXA45725.1
- Trogon mela NXJ84835.1
- Tyto alba XP\_009962599.3
- Upupa epop NWU92594.1
- Uria aalg NXV53482.1
- Urocolius indi NXX77873.1
- Xenopus laevis XP\_018100774.1

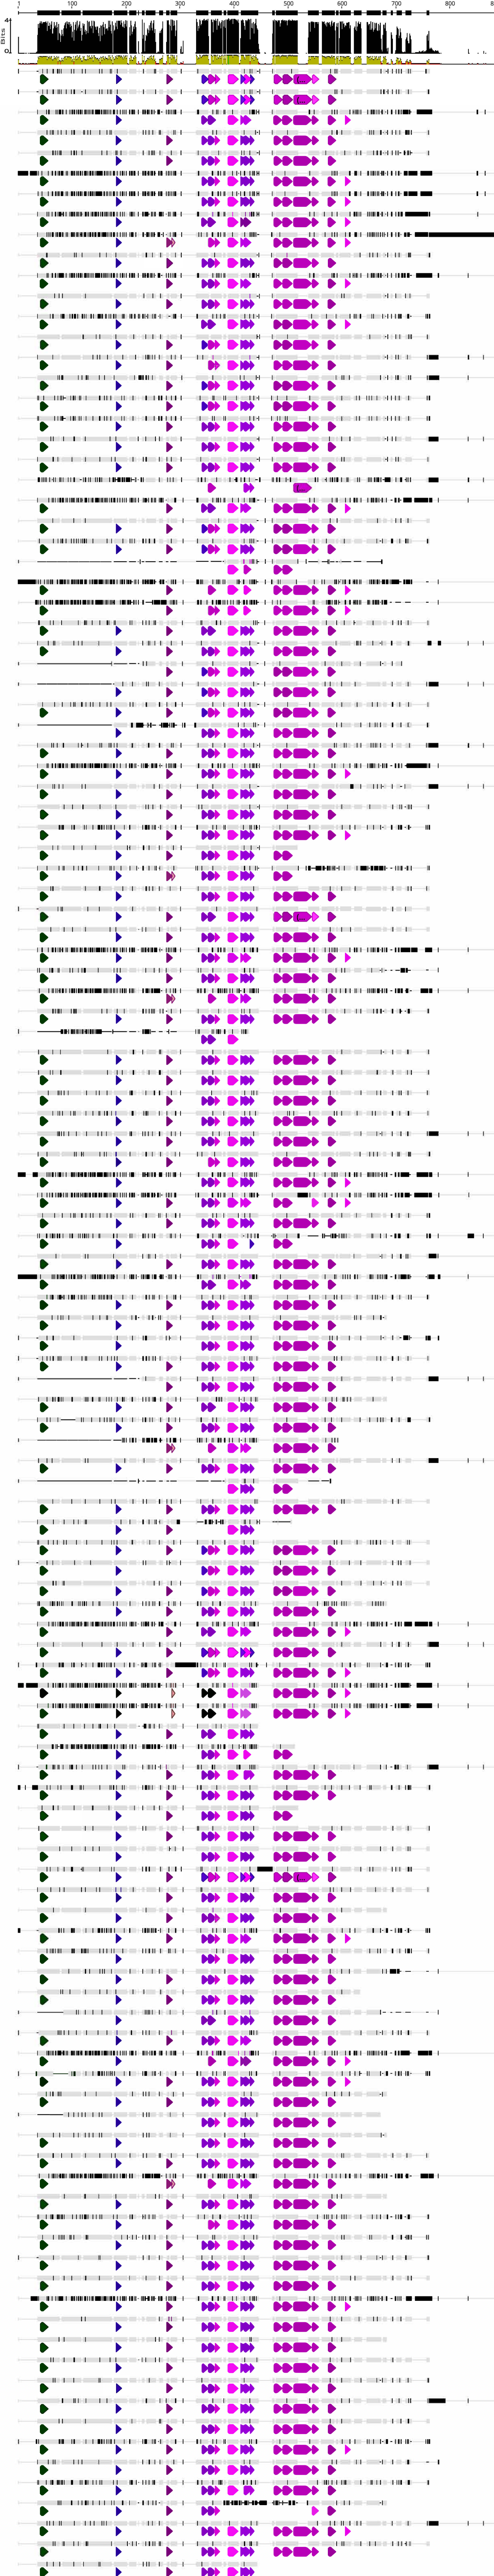

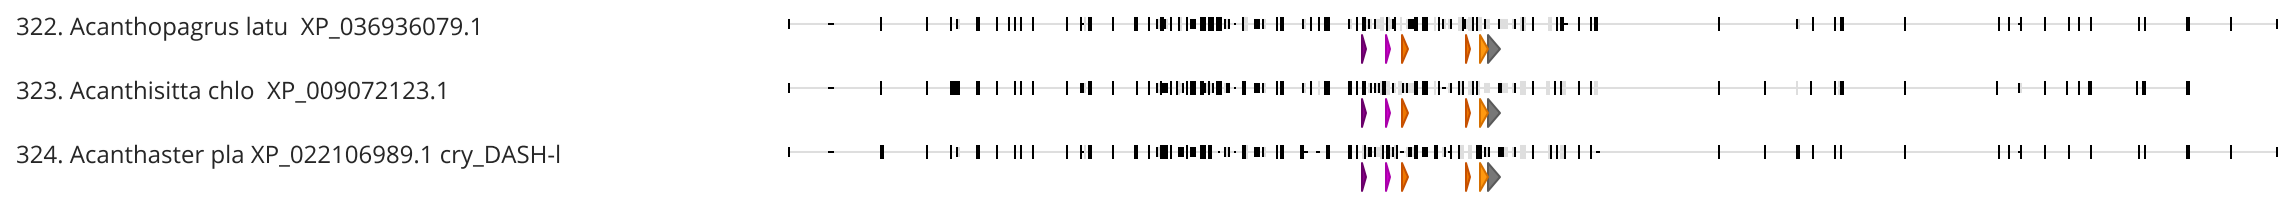

# DCRY

- Acanthaster pla XP\_022112081.1 cry-1-like
- Acyrthosiphon pis NP\_001164532.2 chryptochr
- Agilus pla XP\_025837056.1 cry-1
- Amphibalanus amp KAF0313106.1 cry-1
- Anneissia jap XP\_033101937.1 cry-1-like
- Aplysia cal XP\_005089742.1 cry-1\_X1
- Apolygus luc KAF6198971.1 GE061\_0069
- Apostichopus jap PIK55338.1 putative\_c
- Araneus ven GBN19159.1 cry-1
- Asterias rub XP\_033629349.1 cry-1-like
- Batillaria attr KAG5704110.1
- Bemisia tab XP\_018915448.1 cry-1
- Blomphalaria gla XP\_013075939.1 cry-1-like
- Blattella ger PSN30513.1 cry-1
- Bombyx mor NP\_001182628.1 cry\_1
- Brachionus caly CAF0775459.1
- Brachionus plic RNA16403.1
- Bulinus trun KAH9520043.1
- Candidula unif CAG5120301.1
- Capitella tel ELU12703.1 CAPTEDRAFT
- Chilo sup CDK02014.2 cry\_1
- Chionoecetes opi KAG0726473.1 cry-1
- Chlamys isl AYE92098.1 cry\_1\_par
- Chrysoperla carn XP\_044734495.1
- Cloeon dip CAB3385983.1 protein
- Clunio mar CRK90905.1 CLUMA\_CG00
- Crassostrea gig ANJ02841.1 cry\_1
- Crassostrea virg XP\_022291740.1
- Cyprideis toro CAD7232001.1
- Danaus ple\_ple XP\_032522602.1 cry-1
- Daphnia mag XP\_032790260.1 cry-1-like
- Daphnia pul EPX77441.1 CRY-D
- Darwinula ste CAD7244622.1 unnamed pr
- Dianemobius nig BAF45421.1 cry\_precur
- Dreissena poly KAH3738683.1
- Drosophila mel NP\_732407.1 cry
- Elysia chl RUS86048.1 EGW08\_0062
- Ephemera dan KAF4522540.1 Chryptochr
- Euphausia sup ANW48376.1 cry\_1
- Euprymna sco AGJ94014.1 cry-1
- Eurytemora aff XP\_023327943.1 cry-1-like
- Frankliniella occ XP\_026282294.1 cry-1
- Gryllus bim BAX56238.1 cry\_1
- Haliotis rubr XP\_046567787.1
- Haliotis rufe XP\_046347788.1
- Helicoverpa arm XP\_021184238.1 cry-1\_X1
- Hermetia ill XP\_037923127.1 cry1
- Hermisenda cra AWY10935.1 photorecep
- Homarus ame KAG7176479.1 cry1-like
- Ischnura eleg XP\_046405998.1
- Ladona fulv KAG8231453.1
- Laodelphax str AVP27638.1 cry\_1
- Lepeophtheirus sal XP\_040563574.1 cry1-like
- Limulus pol XP\_022257009.1 LOW\_QUALIT
- Lingula ana XP\_013384752.1 cry-1
- Lottia gig XP\_009051269.1 LOTGIDRAFT
- Lytechinus var XP\_041452601.1
- Melibe leo AWY11207.1 photorecep
- Mercenaria merc XP\_045196489.1
- Modicogryllus s BBD05665.1 cryptochro
- Musca dom XP\_005178207.1 cry-1\_X1
- Mytilus edul CAG2201599.1
- Mytilus gal VDH90443.1 cry
- Nephila pili GFU12876.1
- Notodromas mon CAD7273494.1 unnamed pr
- Octopus bima XP\_014774572.1
- Octopus sin XP\_029634730.1 cry-1
- Orchesella cin ODN01631.1 cry-1
- Owenia fusi CAC9499959.1
- Parasteatoda tepi XP\_042908256.1
- Patiria min XP\_038072863.1
- Pecten max XP\_033740162.1 cry-1-like
- Penaeus mono XP\_037782690.1
- Penaeus van XP\_027216548.1 cry-1-like
- Plakobranthus ocel GFO20146.1
- Platynereis dum AEJ87227.1 putative\_l
- Plutella xyl XP\_037964882.1 cry-1
- Pollicipes poll XP\_037072188.1
- Pomacea can XP\_025095473.1 cry-1-like
- Portunus tritub XP\_045110316.1 LOW QUALIT
- Sepia off QHA94772.1 cry\_6\_vari
- Sepia phar CAE1267008.1
- Spadella cep QNM38094.1 cry\_parti
- Stegodyphus dum XP\_035216340.1 cry-1-like
- Strongylocentrotus pur XP\_030843606.1 cry-1
- Tetranychus urt XP\_025017376.1 cry-1\_X1
- Thrips pal XP\_034243121.1 cry-1
- Tigriopus cal TRY63317.1 TCAL\_01827
- Timema gen CAD7604462.1 unnamed pr
- Timema she CAD7267885.1 unnamed pr
- Tritonia tet AWY11208.1 photorecep

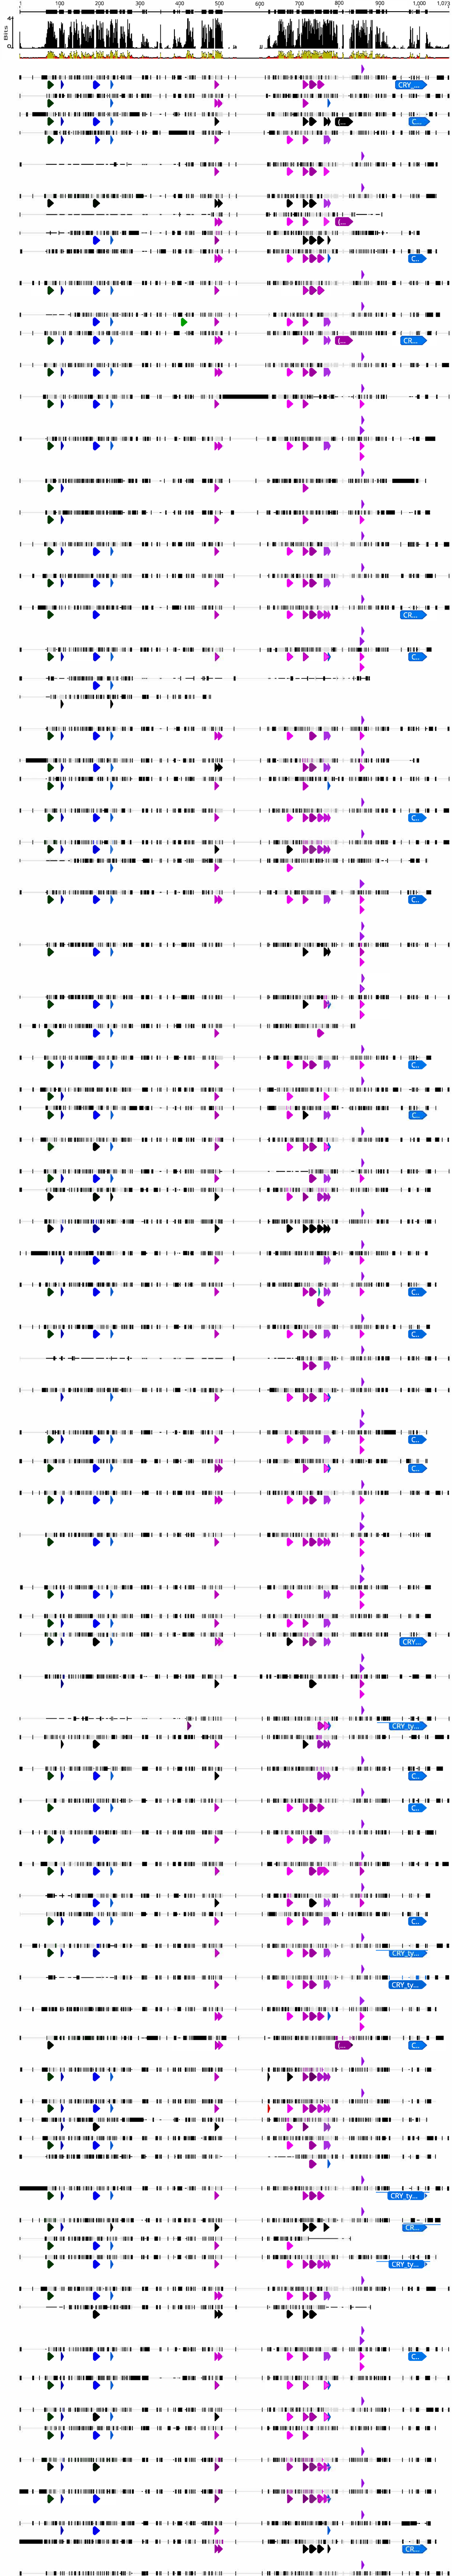



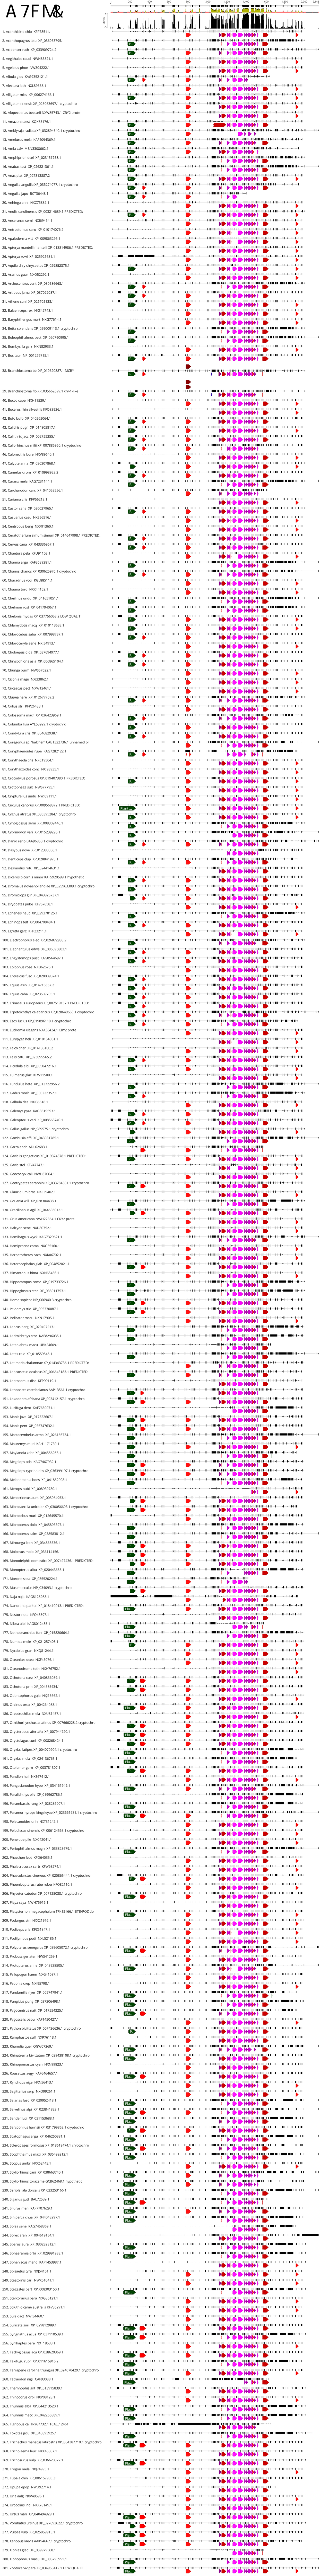

# MCRY st

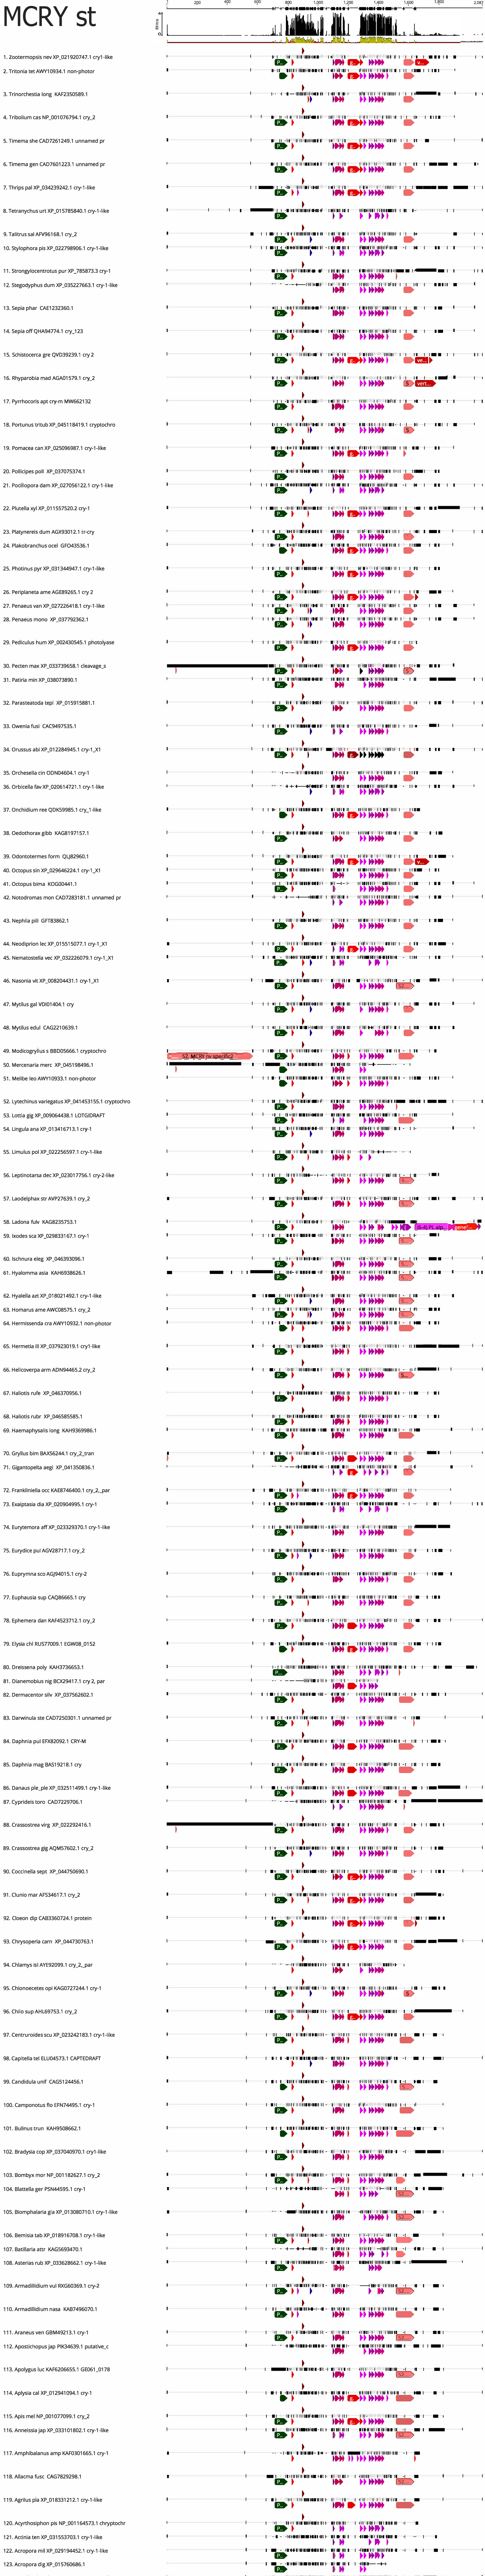

# PCRY

1. Amborella tri ERN14624.1 AMTR\_s0003
2. Amborella tri XP\_020524346.1 cry-1 isof
3. Ananas com XP\_020095834.1 cry-1-like
4. Arabidopsis tha AAL16379.1 cry\_2
5. Arabidopsis tha NP\_567341.1 cry 1
6. Asplenium yun AGI61039.1 blue-light
7. Chara bra GBG70219.1 CBR\_g6351
8. Chlamydomonas rei XP\_001701553.1 cry\_photor
9. Chlorella sor PRW58644.1 blue-light
10. Chloropicon pri QDZ25668.1 cry/DNA\_ph
11. Colocasia esc MQL88944.1 Taro\_02151
12. Colocasia esc MQM06337.1
13. Cucurbita mos XP\_022936701.1 cry-1
14. Cucurbita mos XP\_022958759.1 cry-1
15. Dendrobium cat XP\_020678783.1 cry-1
16. Dendrobium cat XP\_020695999.1 cry-1 isof
17. Ginkgo bil AXV45366.1 cry-1
18. Klebsormidium nit GAQ88501.1 photolyase
19. Malus dom RXH73989.1 DVH24\_0168
20. Malus dom XP\_028947742.1 cry-1-like
21. Marchantia pol OAE26548.1 AXG93\_3817
22. Oryza sativa BAC78798.1 cryptochrome
23. Oryza sat XP\_015625483.1 cry-1\_X1
24. Physcomitrium pat XP\_024380321.1 cry-1-like
25. Picea sit ABR17701.1 unknown
26. Selaginella moe XP\_002969486.2 cry-1
27. Solanum lyc NP\_001234245.1 cry 2
28. Solanum lyc NP\_001234577.1 cry 1b
29. Tetrabaena soc PNH07791.1 cry-1

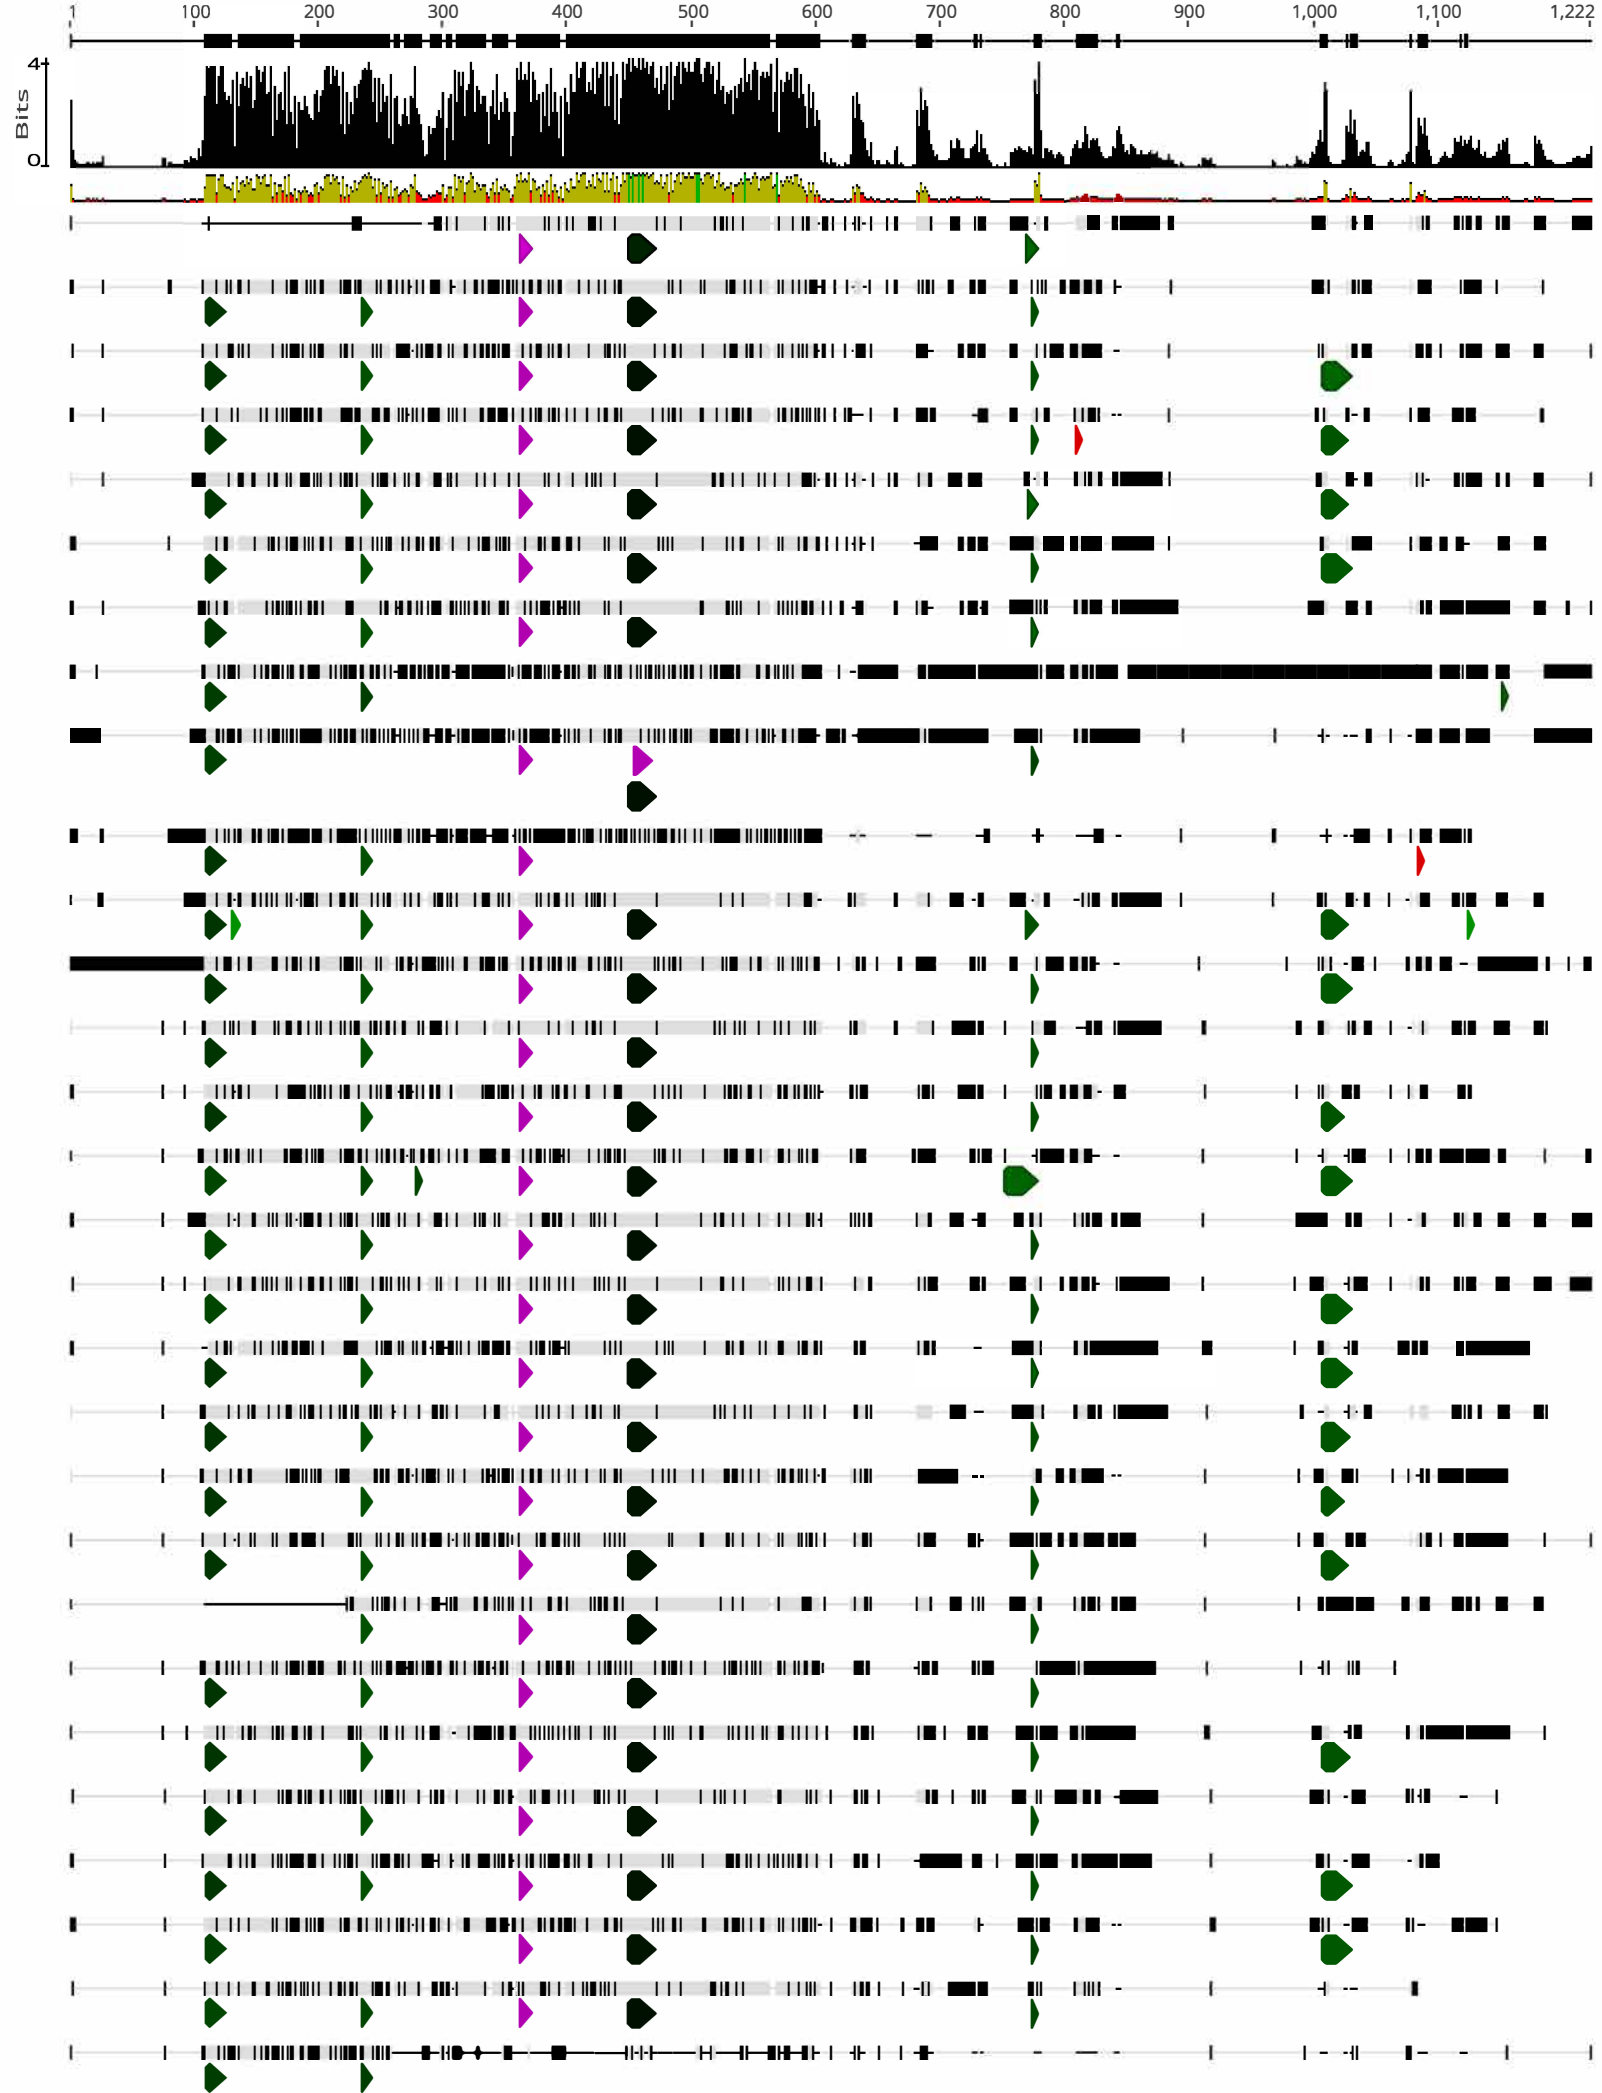

# PCRY-like

- Acanthopagrus latu XP\_036962465.1
- Albula glos KAG9336928.1
- Alosa alos KAG5273095.1
- Alosa sapi XP\_041964697.1
- Amphiprion ocel XP\_023146997.1
- Anabas test XP\_026220618.1
- Archocentrus cent XP\_030586440.1
- Astyanax mexi KAG9272970.1
- Aureococcus ano XP\_009033552.1
- Batillaria attr KAG5707978.1
- Betta spl XP\_029010334.1 photolyase
- Boleophthalmus pect XP\_020790376.1
- Caranx mela KAG7216105.1
- Channa argu KAF3688887.1
- Chanos cha XP\_030646307.1 uncharacte
- Cheilinus undu XP\_041651995.1
- Chelmon rost XP\_041794469.1
- Chloropicon pri QDZ19871.1
- Chrysochromulina KOO31888.1
- Clupea hare XP\_012696746.2
- Colossoma macr XP\_036440474.1
- Coregonus sp. CAB1313746.1 unnamed\_pr
- Crassostrea gig AQM57607.1 cry-like\_p
- Crassostrea virg XP\_022341701.1
- Cyanidiococcus yan KAF6001604.1 F1559\_0040
- Cyprinodon vari XP\_015239459.1
- Danio rer XP\_009291670.1 uncharacte
- Dreissena poly KAH3779326.1
- Echeneis nauc XP\_029378353.1
- Emiliana hux XP\_005784167.1 photolyase
- Engystomops pust KAG8563182.1
- Eurytemora aff XP\_023343976.1 uncharacte
- Fragilariopsis cyl OEU23746.1
- Fundulus hete XP\_012737566.2
- Gadus morh XP\_030221581.1
- Gambusia affi XP\_043980279.1
- Gouania will XP\_028306298.1
- Guillardia the XP\_005829195.1 GUITHDRAFT
- Gymnodraco acut XP\_034089551.1
- Hippocampus come XP\_019743950.1
- Hippoglossus sten XP\_035012548.1
- Labrus berg XP\_020487077.1
- Larimichthys croc KAE8296365.1
- Lates calc XP\_018519383.1
- Lepisosteus ocu XP\_015223435.1 cry-2-like
- Lingulodinium pol QDO16287.1 CPD\_photol
- Lithobates cat PIO38983.1 AB205\_0120
- Maylandia zebr XP\_004553340.2
- Megalops atla KAG7473567.1
- Megalops cyp XP\_036391499.1 photolyase
- Melanotaenia boes XP\_041852192.1
- Menidia meni CAG5958100.1
- Mercenaria merc XP\_045159044.1
- Micromonas comm XP\_002508013.1
- Micropterus dolo XP\_045893137.1
- Micropterus salm XP\_038561010.1
- Misgurnus angu BBI18603.1
- Morone saxa XP\_035520598.1
- Myripristis murd XP\_029909413.1
- Mytilus edul CAG2248635.1
- Nanorana par XP\_018410887.1 uncharacte
- Nibea albi KAG8012608.1
- Nothobranchius furz XP\_015820104.1
- Oncorhynchus gorb XP\_046164461.1
- Oryzias latipes XP\_011474490.1
- Oryzias mela KAF6735023.1
- Ostreococcus tau OUS49163.1 FAD\_bindin
- Paralichthys oliv XP\_019934037.1
- Parambassis rang XP\_028287972.1
- Periophthalmus magn XP\_033823666.1
- Phaeodactylum tri XP\_002179379.1 protein
- Pimephales prom XP\_039510234.1
- Platynereis dum AIE45779.1 cry\_parti
- Plectropomus leop XP\_042352682.1
- Porphyridium pur KAA8496724.1
- Pseudo-nitzschia mul VEU44083.1 unnamed\_pr
- Pundamilia nyer XP\_005729928.1
- Pungitius pung XP\_037306365.1
- Salarias fasc XP\_029951737.1
- Salvelinus alpi XP\_023826479.1
- Sander luci XP\_035858845.1
- Scatophagus argu XP\_046248946.1
- Scleropages for XP\_029109379.1 uncharacte
- Scophthalmus maxi XP\_035497736.1
- Seriola lala dorsalis XP\_023259636.1
- Siniperca chua XP\_044050679.1
- Solea sene XP\_043891818.1
- Sparus aura XP\_030281971.1
- Sphaeramia orbi XP\_029993416.1
- Stegastes part XP\_008304483.1
- Symbiodinium mic OLP98304.1
- Syngnathus acus XP\_037111271.1
- Takifugu rubr BBA21724.1
- Tetraodon nigr CAF92156.1
- Thalassiosira oce EJK58052.1 THAOC\_2184
- Thunnus alba XP\_044211749.1
- Thunnus macc XP\_042266478.1
- Toxotes jacu XP\_040894004.1
- Trematomus bern XP\_033997855.1
- Vitrella bra CEM03182.1 unnamed\_pr
- Xenopus lae XP\_018113364.1 photolyase
- Xiphias glad XP\_039988503.1
- Xiphophorus macu XP\_023182506.1

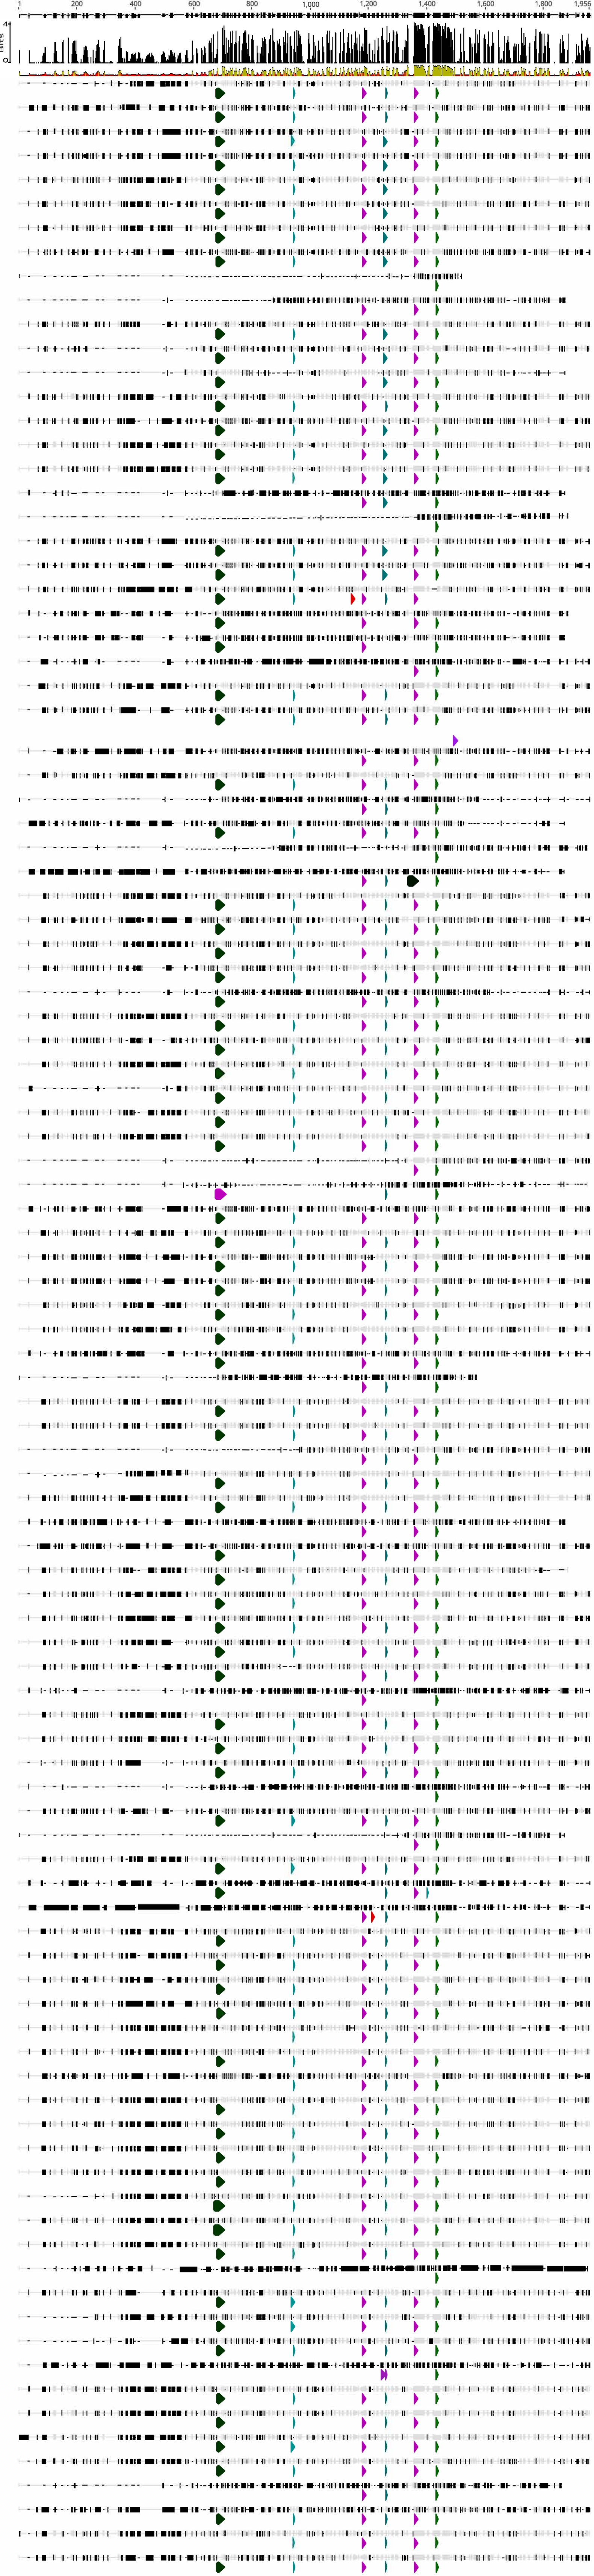

# PPL

1. *Solanum lyc* cryptochrome DASH NP\_001318103.1
2. *Selaginella\_moe*\_bluelightPa XP\_024526689.1
3. *Porphyra\_umb*\_BU14\_0223s OSX75752.1
4. *Picea sit* ABK24574.1 unknown
5. *Physcomitrium pat* XP\_024385617.1 blue-light
6. *Oryza\_sat*\_bluelightP XP\_015630924.1
7. *Marchantia pol* PTQ48384.1
8. *Malus\_dom*\_bluelightPb XP\_008359419.2
9. *Klebsormidium\_nit*\_Photolyasec GAQ87857.1
10. *Galdieria sulph* XP\_005706429.1
11. *Dunaliella sal* DNA photolyase KAF5834002.1
12. *Dendrobium\_cat*\_blue-lighta XP\_028552950.1
13. *Cyanidiococcus\_yan*\_1,3-beta-gluc KAF6001014.1
14. *Cucurbita\_mos*\_bluelightPa XP\_022960062.1
15. *Colocasia\_esc*\_hypothetice MQM01560.1
16. *Chlamydomonas rei* 12g534550v5 XP\_042918714.1
17. *Chara bra*\_CBR\_g37632 GBG83833.1
18. *Arabidopsis\_tha*\_PHR2 NP\_182281.1
19. *Ananas com* PHR2 OAY69588.1
20. *Amborella\_tri*\_blue-light XP\_006854471.1

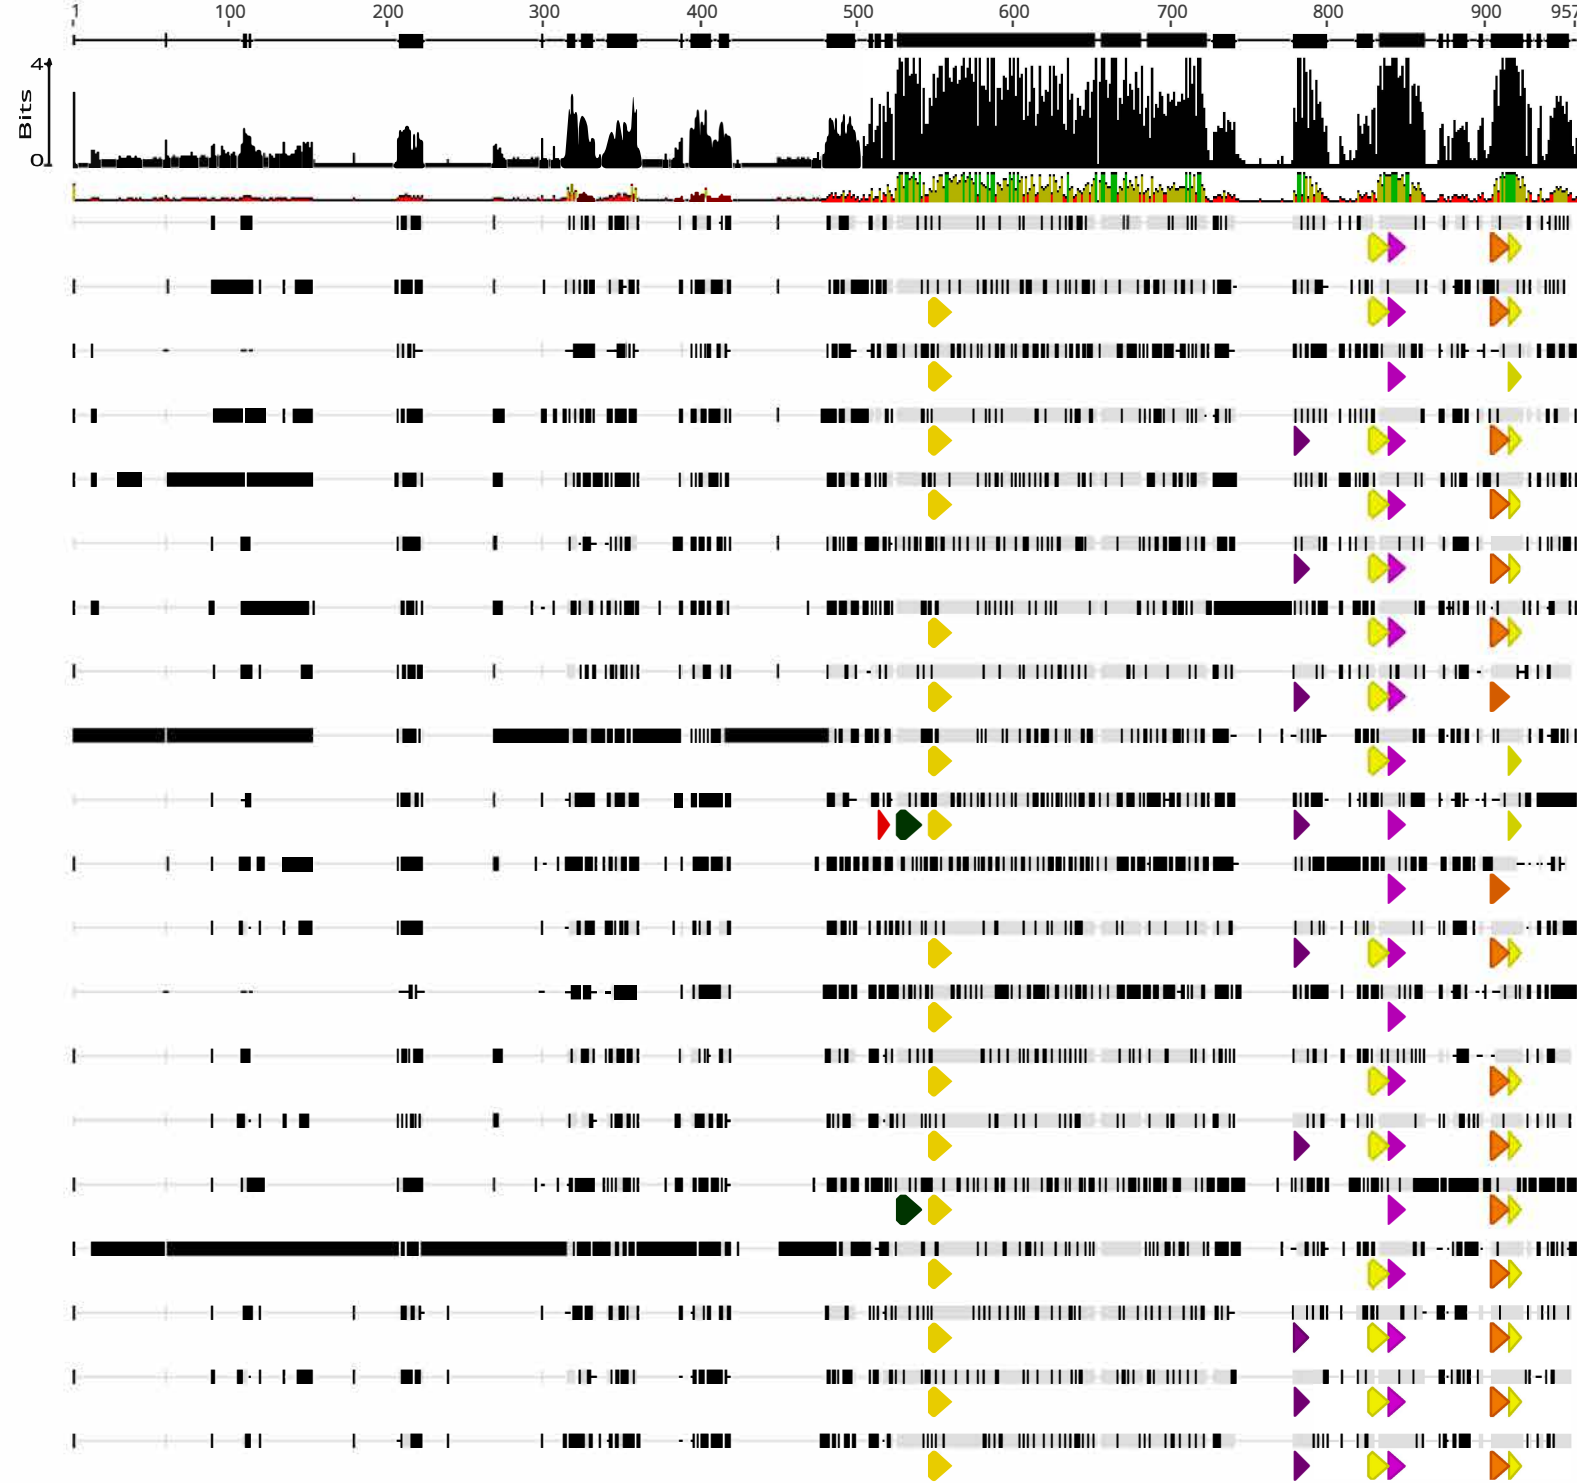

# other

1. Amphimedon que XP\_003386569.1 cry-2-like
2. Aphrocallistes vas CAD24679.1 photolyase
3. Bodo sal CUG26768.1 DNA\_photol
4. Caligus rog QQP54369.1 cry1
5. Chondrus cri XP\_005711823.1 unnamed\_pr
6. Crateromorpha mey CAZ66368.1 cry
7. Ctenocephalides fel XP\_026474410.1 LOW\_QUALIT
8. Cyanidiococcus yan KAF6002947.1 cry-1
9. Galdieria sul\_cryDASH\_fa XP\_005708318.1
10. Galdieria sul XP\_005707133.1 photolyase
11. Gracilariopsis cho PXF43553.1 cry-1
12. Gracilariopsis cho PXF48820.1
13. Leishmania inf XP\_001463490.1 putative\_D
14. Leptomonas pyr XP\_015655956.1 putative\_m
15. Macrostomum lig PAA82046.1 BOX15\_Mlig
16. Oikopleura dioica CAG5112545.1 Oidioi.mRN
17. Perkinsela sp. KNH05154.1 DNA\_photol
18. Pseudo-nitzschia mul VEU40361.1 unnamed\_pr
19. Strigomonas cul EPY25543.1 DNA\_photol
20. Suberites dom CAZ66367.1 cry

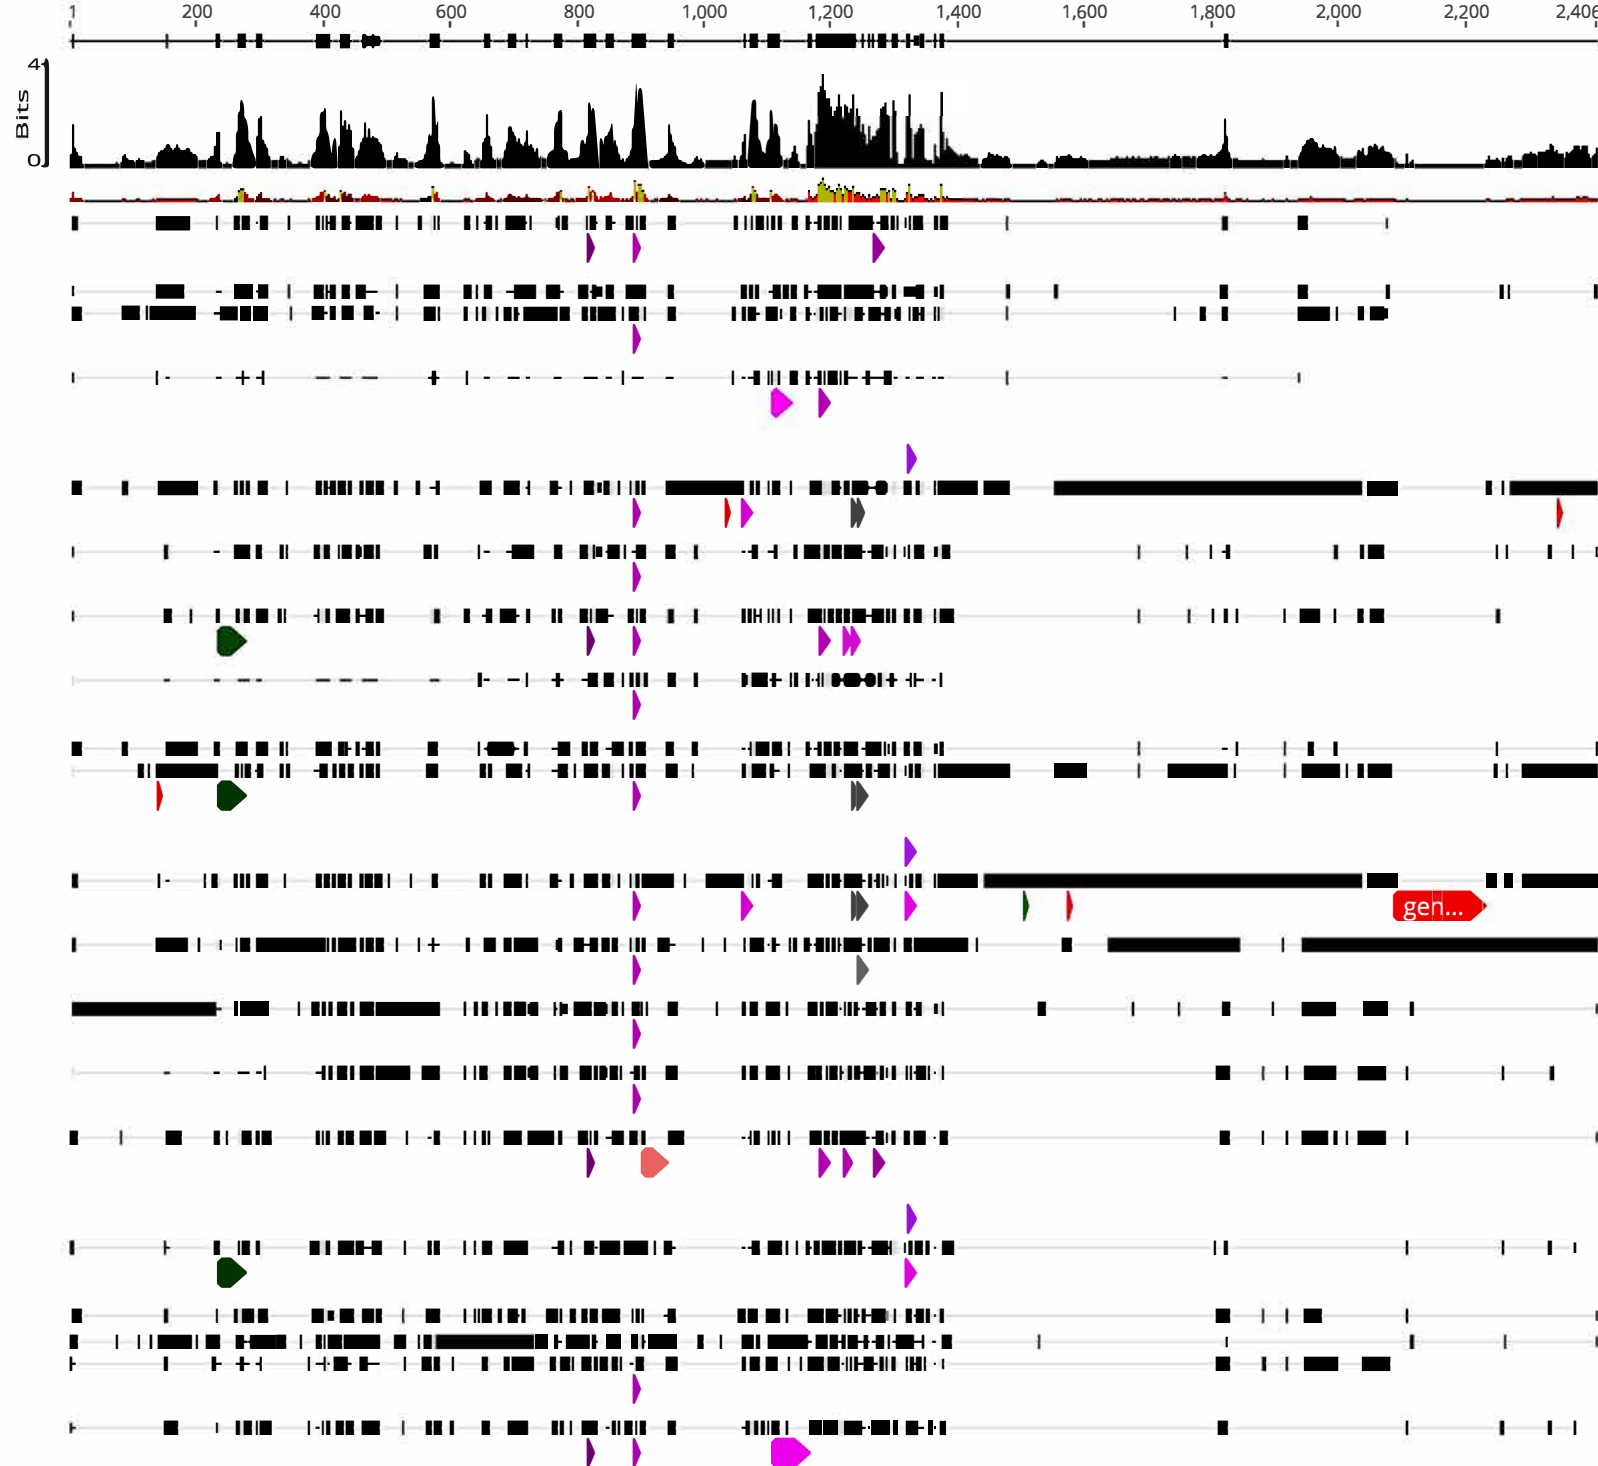

Supplement: s1 [file s1]
