# Supplementary material for: The Gain and Loss of Cryptochrome/Photolyase Family Members during Evolution
Source: MDPI journal article supplement (doi:10.3390/genes13091613), 2022-09-08
Supplement: s1 [file s1]

| CPF-member      | Name   | Motif                                                    | Comment                                                                                                                                                       | Reference(s)   |
|-----------------|--------|----------------------------------------------------------|---------------------------------------------------------------------------------------------------------------------------------------------------------------|----------------|
| DASH-CRY        | dlr    | YWVxFELLWRD                                              | <ul style="list-style-type: none"> <li>• CPD lesion repair</li> <li>• 2 mismatches allowed</li> </ul>                                                         | [25,26,165]    |
|                 | dlr1   | MSNRGRQ                                                  | <ul style="list-style-type: none"> <li>• Part of D-R salt bridge</li> <li>• CPD lesion repair</li> <li>• 1 mismatch allowed</li> </ul>                        | [25,26,165]    |
|                 | dlr2   | DYDxxSNYGNWxY                                            | <ul style="list-style-type: none"> <li>• Part of D-R salt bridge</li> <li>• CPD lesion repair</li> <li>• Trp-triad</li> <li>• 2 mismatches allowed</li> </ul> | [25,26,53,165] |
| CPD class I/III | c1/3-1 | DGDLxxxNxGWQW                                            | <ul style="list-style-type: none"> <li>• Generated from alignment of sequences from references</li> <li>• 2 mismatches allowed</li> </ul>                     | [9,175, 176]   |
|                 | c3-2   | PxFRxFNPxxQxEKFD                                         | <ul style="list-style-type: none"> <li>• From Alignment of 5 CPDIII sequences (see supplement in Nie et al., 2021)</li> <li>• 2 mismatches allowed</li> </ul> | [176]          |
|                 | c3     | WQWxAGxGxD                                               | <ul style="list-style-type: none"> <li>• From Alignment of 5 CPDIII sequences (see supplement in Nie et al., 2021)</li> <li>• 1 mismatch allowed</li> </ul>   | [176]          |
| CPD class II    | mts    | MHGFxRMYWAK                                              | <ul style="list-style-type: none"> <li>• Mitochondrial target sequence (MTS)</li> <li>• 2 mismatches allowed</li> </ul>                                       | [9,173-175]    |
|                 | cc1    | EExxVRREL                                                | <ul style="list-style-type: none"> <li>• 1 mismatch allowed</li> </ul>                                                                                        | [175]          |
|                 | cc2    | YMNyGCKRKf                                               | <ul style="list-style-type: none"> <li>• 2 mismatches allowed</li> <li>• Only conserved in eukaryots</li> </ul>                                               | [174,175]      |
|                 | cc3    | NGYxG<br>(microorganisms & animals)<br>SGYxG<br>(plants) | <ul style="list-style-type: none"> <li>• N in microorganisms and animals</li> <li>• S in many plants</li> </ul>                                               | [9]            |

| CPF-member | Name | Motif                                                                          | Comment                                                                                                           | Reference(s) |
|------------|------|--------------------------------------------------------------------------------|-------------------------------------------------------------------------------------------------------------------|--------------|
|            | cab  | FxLxxxFxxAxxxxYxxM                                                             | <ul style="list-style-type: none"> <li>antenna loop (antenna binding site)</li> <li>1 mismatch allowed</li> </ul> | [36]         |
| DCRY       | dcl  | WVSxS                                                                          | <ul style="list-style-type: none"> <li>C-terminal lid</li> </ul>                                                  | [172]        |
|            | dct  | PPHCxPSxxxxxRQFxWL                                                             | <ul style="list-style-type: none"> <li>C-terminal tail</li> <li>3 mismatches allowed</li> </ul>                   | [172]        |
|            | d2pu | FIFDG                                                                          | <ul style="list-style-type: none"> <li>Secondary pocket upper helix</li> </ul>                                    | [171]        |
|            | d2pl | EQDCEPxWxxR                                                                    | <ul style="list-style-type: none"> <li>Secondary pocket lower helix</li> <li>2 mismatches allowed</li> </ul>      | [171]        |
|            | dm1  | HTLWxP                                                                         | <ul style="list-style-type: none"> <li>DCRY motif1</li> </ul>                                                     | New motif    |
| MCRY       | mpm  | ERKA <del>W</del> V <del>A</del> x <del>F</del> x <del>R</del> PxMx<br>xxSLLxS | <ul style="list-style-type: none"> <li>Phosphate motif</li> <li>2 mismatches allowed</li> </ul>                   | [172]        |
|            | mcl  | WMWLSCSSFFQ <del>Q</del> FF<br>H <del>C</del> Y                                | <ul style="list-style-type: none"> <li>C-terminal lid</li> <li>2 mismatches allowed</li> </ul>                    | [172]        |
|            | ml   | YKxxK                                                                          | <ul style="list-style-type: none"> <li>Protrusion loop</li> </ul>                                                 | [172]        |
|            | m2pu | DPWFAGSSN                                                                      | <ul style="list-style-type: none"> <li>Secondary pocket upper helix</li> <li>2 mismatches allowed</li> </ul>      | [171]        |

| CPF-member       | Name        | Motif                                                                              | Comment                                                                                                                                                         | Reference(s) |
|------------------|-------------|------------------------------------------------------------------------------------|-----------------------------------------------------------------------------------------------------------------------------------------------------------------|--------------|
|                  | mct         | YRGLCLLASVPS                                                                       | <ul style="list-style-type: none"> <li>Conserved C-terminal extension</li> <li>2 mismatches allowed</li> </ul>                                                  | [170]        |
|                  | m2pl        | EYDSEPF <del>G</del> KER<br>(non-insects)<br>EEDPEP <del>x</del> GRVR<br>(insects) | <ul style="list-style-type: none"> <li>Secondary pocket lower helix</li> <li>1 mismatch allowed (non-insects)</li> <li>2 mismatches allows (insects)</li> </ul> | [171]        |
|                  | mnc         | VYxxL                                                                              | <ul style="list-style-type: none"> <li>MCRY non-chordate specific</li> </ul>                                                                                    | New motif    |
|                  | I           | VWPGG                                                                              | <ul style="list-style-type: none"> <li>MCRY1 specific</li> </ul>                                                                                                | New motif    |
|                  | II          | RLDKHL                                                                             | <ul style="list-style-type: none"> <li>MCRY2 specific</li> <li></li> </ul>                                                                                      | New motif    |
| (6-4) photolyase | $\alpha$ 15 | HHLARHxVACFLTRG<br>DL                                                              | <ul style="list-style-type: none"> <li>Conserved <math>\alpha</math>-Helix 15</li> <li>2 mismatches allowed</li> </ul>                                          | [169]        |
|                  | $\alpha$ 10 | SPYLxFGCLS                                                                         | <ul style="list-style-type: none"> <li>Conserved <math>\alpha</math>-Helix 10</li> <li>1 mismatch allowed</li> </ul>                                            | [169]        |
|                  | sl          | MxGNxxCxQIPW                                                                       | <ul style="list-style-type: none"> <li>Conserved sulfur loop</li> <li>1 mismatch allowed</li> </ul>                                                             | [169]        |

| CPF-member | Name        | Motif               | Comment                                                                                                                 | Reference(s) |
|------------|-------------|---------------------|-------------------------------------------------------------------------------------------------------------------------|--------------|
|            | $\alpha$ 12 | PPxSLxGQLxWREFxYTxA | <ul style="list-style-type: none"> <li>Conserved <math>\alpha</math>-helix 12</li> <li>2 mismatches allowed</li> </ul>  | [169]        |
|            | $\alpha$ 11 | SxRxFxxxL           | <ul style="list-style-type: none"> <li>Conserved <math>\alpha</math>-helix 11</li> <li>no mismatches allowed</li> </ul> | [169]        |
|            | $\alpha$ 8  | GGExEALxR           | <ul style="list-style-type: none"> <li>Conserved <math>\alpha</math>-helix 8</li> <li>1 mismatch allowed</li> </ul>     | [169]        |
|            | $\alpha$ 14 | PxIDAIMxQLxxxG      | <ul style="list-style-type: none"> <li>Conserved <math>\alpha</math>-helix 14</li> <li>1 mismatch allowed</li> </ul>    | [169]        |
|            | $\alpha$ 16 | WExGxxVFxxLLxD      | <ul style="list-style-type: none"> <li>Conserved <math>\alpha</math>-helix 16</li> <li>1 mismatch allowed</li> </ul>    | [169]        |
|            | $\alpha$ 17 | DxxxNxGxWMWL        | <ul style="list-style-type: none"> <li>Conserved <math>\alpha</math>-helix 17</li> <li>1 mismatch allowed</li> </ul>    | [169]        |
|            | $\alpha$ 18 | YxPxxFGxxxDPxG      | <ul style="list-style-type: none"> <li>Conserved <math>\alpha</math>-helix 18</li> <li>1 mismatch allowed</li> </ul>    | [169]        |
|            | 6-4         | YIYEPWKAP           | <ul style="list-style-type: none"> <li>6-4 photolyase specific</li> </ul>                                               | New motif    |
| PCRY       | pd1         | DQxVP               | <ul style="list-style-type: none"> <li>Part of DAS-motif1</li> </ul>                                                    | [167,168]    |
|            | pd2         | STxExxS             | <ul style="list-style-type: none"> <li>Part of DAS-motif2</li> </ul>                                                    | [167,168]    |

| CPF-member | Name | Motif                       | Comment                                                                                                     | Reference(s) |
|------------|------|-----------------------------|-------------------------------------------------------------------------------------------------------------|--------------|
|            | pc1  | QGRTGYPLVDAGMR<br>ELWATGWxH | <ul style="list-style-type: none"> <li>Conserved in all plant CRYs</li> <li>3 mismatches allowed</li> </ul> | [166]        |
|            | pc   | DLLYEPW                     | <ul style="list-style-type: none"> <li>All plant CRY1s</li> <li>1 mismatch allowed</li> </ul>               | [166]        |
|            | pn   | VWFRRDLRxEDNPAL             | <ul style="list-style-type: none"> <li>N-terminal</li> <li>2 mismatches allowed</li> </ul>                  | [166]        |
| PCRY-like  | pl1  | VGLR                        | <ul style="list-style-type: none"> <li>PCRY-like specific 1</li> </ul>                                      | New motif    |
|            | pl2  | WRDLAY                      | <ul style="list-style-type: none"> <li>PCRY-like specific 2</li> </ul>                                      | New motif    |
|            | pl3  | MWQNxG                      | <ul style="list-style-type: none"> <li>PCRY-like specific 3</li> </ul>                                      | New motif    |
| CRY4       | 4a   | GXPPLTYKxF                  | <ul style="list-style-type: none"> <li>CRY4 motif a</li> </ul>                                              | New motif    |
|            | 4b   | PNSLLPSTTGL                 | <ul style="list-style-type: none"> <li>CRY4 motif b</li> </ul>                                              | New motif    |
|            | 4c   | TxNFTxMX                    | <ul style="list-style-type: none"> <li>CRY4 conserved</li> </ul>                                            | [83]         |
|            | 4Y   | WYEDAERL                    | <ul style="list-style-type: none"> <li>CRY4 conserved Y</li> <li>2 mismatches allowed</li> </ul>            | [83]         |

| CPF-member | Name | Motif          | Comment                                                                | Reference(s) |
|------------|------|----------------|------------------------------------------------------------------------|--------------|
| ppl        | ppl1 | ESxSxxPVYCFDPR | <ul style="list-style-type: none"> <li>2 mismatches allowed</li> </ul> | New motif    |
|            | ppl2 | BSJYGANFCKI    | <ul style="list-style-type: none"> <li>2 mismatches allowed</li> </ul> | New motif    |
|            | ppl3 | FFRFxTxK       |                                                                        | New motif    |

## References

9. Kiontke, S.; Geisselbrecht, Y.; Pokorny, R.; Carell, T.; Batschauer, A.; Essen, L.O. Crystal Structures of an Archaeal Class II DNA Photolyase and Its Complex with UV-Damaged Duplex DNA. *The EMBO journal* **2011**, *30*, 4437–4449, doi:10.1038/emboj.2011.313.
25. Tagua, V.G.; Pausch, M.; Eckel, M.; Gutiérrez, G.; Miralles-Durán, A.; Sanz, C.; Eslava, A.P.; Pokorny, R.; Corrochano, L.M.; Batschauer, A. Fungal Cryptochrome with DNA Repair Activity Reveals an Early Stage in Cryptochrome Evolution. *PNAS* **2015**, *112*, 15130–15135, doi:10.1073/pnas.1514637112.
26. Navarro, E.; Niemann, N.; Kock, D.; Dadaeva, T.; Gutiérrez, G.; Engelsdorf, T.; Kiontke, S.; Corrochano, L.M.; Batschauer, A.; Garre, V. The DASH-Type Cryptochrome from the Fungus *Mucor Circinelloides* Is a Canonical CPD-Photolyase. *Current Biology* **2020**, *30*, 4483–4490.e4, doi:10.1016/j.cub.2020.08.051.
36. Kiontke, S.; Gnau, P.; Haselsberger, R.; Batschauer, A.; Essen, L.-O. Structural and Evolutionary Aspects of Antenna Chromophore Usage by Class II Photolyases. *J Biol Chem* **2014**, *289*, 19659–19669, doi:10.1074/jbc.M113.542431.
53. Daiyasu, H.; Ishikawa, T.; Kuma, K.; Iwai, S.; Todo, T.; Toh, H. Identification of Cryptochrome DASH from Vertebrates. *Genes to Cells* **2004**, *9*, 479–495, doi:10.1111/j.1356-9597.2004.00738.x.
83. Zoltowski, B.D.; Chelliah, Y.; Wickramaratne, A.; Jarocha, L.; Karki, N.; Xu, W.; Mouritsen, H.; Hore, P.J.; Hibbs, R.E.; Green, C.B.; et al. Chemical and Structural Analysis of a Photoactive Vertebrate Cryptochrome from Pigeon. *Proceedings of the National Academy of Sciences of the United States of America* **2019**, *116*, 19449–19457, doi:10.1073/pnas.1907875116.
165. Pokorny, R.; Klar, T.; Hennecke, U.; Carell, T.; Batschauer, A.; Essen, L.-O. Recognition and Repair of UV Lesions in Loop Structures of Duplex DNA by DASH-Type Cryptochrome. *PNAS* **2008**, *105*, 21023–21027, doi:10.1073/pnas.0805830106.

166. Cao, S.; He, S.; Lv, H.; Zhang, J.; Aslam, M.; Cheng, H.; Hu, A.; Cao, G.; Zhang, X.; Yu, Y.; et al. Genome-Wide Analysis of the Cryptochrome Gene Family in Plants. *Tropical Plant Biology* **2020**, *13*, 117–126, doi:10.1007/s12042-019-09249-9.
167. Partch, C.L.; Clarkson, M.W.; Ozgur, S.; Lee, A.L.; Sancar, A. Role of Structural Plasticity in Signal Transduction by the Cryptochrome Blue-Light Photoreceptor. *Biochemistry* **2005**, *44*, 3795–3805, doi:10.1021/bi047545g.
168. Lin, C.; Shalitin, D. Cryptochrome Structure and Signal Transduction. *Annual review of plant biology* **2003**, *54*, 469–496, doi:10.1146/annurev.arplant.54.110901.160901.
169. Hitomi, K.; DiTacchio, L.; Arvai, A.S.; Yamamoto, J.; Kim, S.T.; Todo, T.; Tainer, J.A.; Iwai, S.; Panda, S.; Getzoff, E.D. Functional Motifs in the (6-4) Photolyase Crystal Structure Make a Comparative Framework for DNA Repair Photolyases and Clock Cryptochromes. *Proceedings of the National Academy of Sciences of the United States of America* **2009**, *106*, 6962–6967, doi:10.1073/pnas.0809180106.
170. Xing, W.; Busino, L.; Hinds, T.R.; Marionni, S.T.; Saifee, N.H.; Bush, M.F.; Pagano, M.; Zheng, N. SCF(FBXL3) Ubiquitin Ligase Targets Cryptochromes at Their Cofactor Pocket. *Nature* **2013**, *496*, 64–68, doi:10.1038/nature11964.
171. Rosensweig, C.; Reynolds, K.A.; Gao, P.; Laothamatas, I.; Shan, Y.; Ranganathan, R.; Takahashi, J.S.; Green, C.B. An Evolutionary Hotspot Defines Functional Differences between CRYPTOCHROMES. *Nat Commun* **2018**, *9*, 1138, doi:10.1038/s41467-018-03503-6.
172. Zoltowski, B.D.; Vaidya, A.T.; Top, D.; Widom, J.; Young, M.W.; Crane, B.R. Structure of Full-Length Drosophila Cryptochrome. *Nature* **2011**, *480*, 396–399, doi:10.1038/nature10618.
173. Zhang, M.; Wang, L.; Shu, S.; Sancar, A.; Zhong, D. Bifurcating Electron-Transfer Pathways in DNA Photolyases Determine the Repair Quantum Yield. *Science (New York, N. Y.)* **2016**, *354*, 209–213, doi:10.1126/science.aah6071.
174. Hitomi, K.; Arvai, A.S.; Yamamoto, J.; Hitomi, C.; Teranishi, M.; Hirouchi, T.; Yamamoto, K.; Iwai, S.; Tainer, J.A.; Hidema, J.; et al. Eukaryotic Class II Cyclobutane Pyrimidine Dimer Photolyase Structure Reveals Basis for Improved Ultraviolet Tolerance in Plants. *The Journal of biological chemistry* **2012**, *287*, 12060–12069, doi:10.1074/jbc.M111.244020.
175. Takahashi, S.; Teranishi, M.; Izumi, M.; Takahashi, M.; Takahashi, F.; Hidema, J. Transport of Rice Cyclobutane Pyrimidine Dimer Photolyase into Mitochondria Relies on a Targeting Sequence Located in Its C-Terminal Internal Region. *The Plant journal : for cell and molecular biology* **2014**, *79*, 951–963, doi:10.1111/tpj.12598.
176. Nie, G.; Liu, X.; Zhou, X.; Song, Q.; Fu, M.; Xu, F.; Wang, X. Functional Analysis of a Novel Cryptochrome Gene (GbCRY1) from Ginkgo Biloba. *Plant Signal Behav* **2021**, *16*, 1850627, doi:10.1080/15592324.2020.1850627.
