# Supplementary material for: The Gain and Loss of Cryptochrome/Photolyase Family Members during Evolution
Source: MDPI journal article supplement (doi:10.3390/genes13091613), 2022-09-08
Supplement: s1 [file s1]

>Acanthaster\_pla\_XP\_022085333.1\_cry-2-like

MNSPMAKHRSLHWFRKGLRLHDNPSSLAAVKDSQEFRAIFVLDPVFVKSGTVGINRWRFLQLSLRDLDEGLKR  
LGSRLYVLRGKPTVEFPDIFKSWQISHLTFEHDTEPYAKIRDEAVTTIAEEHGVRVTQKTSHTLYDIQSILKA  
NGGKPPSTYQSLLSVLKMPPPRKPEPALSKEHLKDCKLPVGTDHDGEFGVPSLEELGLDPNDAGPVLFPGGE  
TEALQRMEEHLERQDWVCKFEKPKTEPNTLSPSTTVLSPYLKFGCLSPRLFYHRVQDVYARKKSHSKPPVSLH  
GQLLWREFFYTVAATPNFHKMEGNAVCLQVPWDTNEEYFQAWKQARTGYPPIDAINTQLKQEGWIHHLARHA  
VACFLTRGDLWISWEEGQKVFEWLLDADYSLNAGNWMWLSASAFFHQYFRVYSPTVFGKKTDKNGDYIRKYL  
PVLKKMPAQYIYEPWTAPRSVQEKAGCIMGTDYPRPIVDHSVVMKRNMERMKRARAAYGDSNANSKSQKEAS  
SSKKKVNAGGLKRKSKAEDSGHSTKKTKEISDFF

>Acanthaster\_pla\_XP\_022093922.1\_cry-1-like

MGKRKRSRGSSRRGVSLVHWFRNKGLRLHDNPALREALVGAKTFRCVYILDPWFARSPNQGVNKWRFLQLCLE  
DLDDSSLRKLNSRLFLVRGQPSDVFPKLFKEWGVTRLSFEEDPEVFGIQRDAKIKTLAATFKVQVITRMSHTLY  
DPKEIVKMNSNPPLTYKHFQYLISLLDQPTFPEETITLSDIEGINTAIAANHDSKYGLATLEELGFDSEDI  
PPVWIGGETVAKQQLDRHLERKAWVANFERPRMSSASIMACPTGLGPYLRFGCLSPRLFYWRTELYQKMKKT  
SNIPFLFLHGQLYWREFFFTLGYNNQKLDQMVGNPICIQIPWEKNEEALQRWRDQGTGFPWIDAIMIQLRQEGW  
VHPVARHAVACFLTRGDLWISWEEGAKIFEDLLDADWSVNAGNWIWLSCSSFYQQFFHCYTFPCPVKFGQQT  
PNGDFIRKYIPALKNFSSKYIYNPWTAPEIQEQAKCTIGKDYPPFPMVNHNEAIRRNTERMNINILQNVSSKTP  
KYIHDECSTGVPSFCRTSSSTWVSNTPEPLRKMPHLSQDSMPVLSHDMRLSQGSMALLPQDEVPGTSGYMST  
NQSTMLTLTDPYTCNMTQESLVAAQPSQDAPGTSWNDSNNLANQYFNQ

>Acanthaster\_pla\_XP\_022095977.1\_photolyase

MAKGEKGSNQTTKKGKRKHEDSSSSSEAAALPSKKLKIETKTSDDTTKQEVKSTSDAQGIMEKLMALRLRTASSI  
SAFKFNKKRVRVLSGVQDVPEGCGQILYWMSSRDQVRQDNWGLLYAQLAMKLTVPPLHVCFLVPKFLDATIRH  
FGFMLKGLAEVEQELKELDIPFHLLTGEATDVLPSFVKDHGIGGMVTDFSPLRVPSKWVKEATDSLPHIPVCQ  
VDAHNIVPCWEASPKLEYGARTIRPKITKLLSTFLTEFPVVKHHPHAKTMEPVDWEAADCSLDVDRTVEEV  
SWAKPGTKAGLLMLEEFCLQRLKYFEADRNNPNKTALSNLSPWIHFQVSAQRAALVVRGHRSKYSKSVESYI  
EESVVRRELADNFCFYNEHYDSIEGTNDWAKETLKVHAKDKREYVYSKEQLEKARTHDDLWNAQVQLVKEAK  
MHGFLRMWAKKILEWTPSPEDALEIAIYLNDKYSILDGRDPNGYVGCMMWSICGIHDQGWAERPVGKIRYMNY  
NGCKRKFDDVAQFVRKYKQKL

>Acanthaster\_pla\_XP\_022106989.1\_cry\_DASH-1

MANKLRTVICLLRNDLRYHDNEVLHWANQNADYVLPYCLDPRHYHGTWHFSFPKTGPHRLKFLQLSLQDLKE  
TLQQVGSDDLVISRGKPESVIQDLVRQLGKDNVKAVALQEEATREELDVEAAIAKSCQVPVQKFWGSTLYHRDD  
IPFRIRELPNVFTEFRKKTENQSRVRPTFPMPSRLNPLPPGIDPGLTPSMEDMGMAEPVKDDRSAPFPYSGGER  
QALTRIQUHYFDYDYVATYKETRNLIGADYSTKFSSWLALGCLSPRIYEEIKKYEKERRANQSTYVWLFEL  
LWRDYFKFVALKFGDRLFYLSGLLGNRREWRENKALFDAREGQGTGVPFVDANMRELAATGFMSNRGRQNVAS  
FLTKDLKLDWRLGAWEFHELLIDHDVCSNYGNWLYCAGVGNDRQDRKFNMIKQGLDYDAQGDYVRLWVPELQ  
GIKGGAVHTPWALSSSLLIQANVRLGHTYPMPIVKSPFWGKYTGSGQERKSGKGPGRQQTGRGLDFYFSSAKQ  
RGHKK

>Acanthaster\_pla\_XP\_022112081.1\_cry-1-like

MPARPASGTDEDRKKGTIAVHWFRHGLRLHDNPSTFIDAINLASELYPVFIIDGEVAGTKVCGFNWRFLYEAL  
EDIDRLKEVGGRLYTFKGDPCTIFDQLIEEWGVNLITFEQDPEPIWQDRDNAVKRLCSEIRGIQYIERVSHTL  
WDPNEVTARNGGTPPVTYAMFQEVVSMIGLPQRPEKEPDFSLVNLPICDNFGQFALPRFQDIGPKMEHPDQER  
QLWIGGETRALELFEVVRKEAAAFKAGYCLPNQYMPPELLGPPMSLSPYLRFGCLSVRKIFYWRIHDTYTELNN  
AISPSTHLTAQLIWREYFYTMSVGNKNFDRMNGNNICLKIDWNQDKEKLEKWEGETGYPWIDACMKQLKIEGW  
IHQVARHAVACFLTRGDLWISWEEGLKVIFYQYLLDADWSICAGNMMWISSSAFEKVLQCPNCFPCPVRYGRMD  
PNGEYVRKFLPVLANMPLRYLFEPWKAPLAVQEKVGCIGKDYPMPIVEHRSAAASNREKMNKTVQSLEEKFA  
HCTPSNETEVREFSWLPETIRGVDKCTADDLCEILGI

>Acanthisitta\_chlo\_KFP78511.1

RFLQLSLEDLNSLRKLNSRLFVVRGQPTDVFPRFLKEWGVTRLTTFEYDSEFPFGKERDAAI IKLAKEAGVEVV  
IENSHTLYDLDRIIELNGHKPPLTYKRFQAIISRMELPKKPVSTVISQQMETCKVDIQENHDDVYGVPSLEEL  
GFPTDGLAPAVWQGGETEALARLDKHLERKAWVANFERPRMNANSLLASPTGLSPYLRFGCLSCRLFYRLWE  
LYKKVKRNSTPPLSLYGQLLWREFFYTAAATNNPKFDRMEGNPICIQIPWDRNPEALAKWAEKGTGFPWIDAIM  
TQLRQEGWIHHLARHAVACFLTRGDLWISWESGVRVFDLLEDADFSINAGSWMWLSCSAFFQQFFHCYCPVG  
FGRRTDPSGDYVKRYLPKLKGFPSRYIYEPWNAPESVQKAAKCIIGVDYPKPMVNHAETSRLNIERMKQIYQQ  
LSRYRGLCLLASVPSCAEDLSGPVTDASAGQGCSTSTVARLSQADQVSPKRKHEGVVEPCAELYKRAKVTGF  
PASEIPGK

>Acanthisitta\_chlo\_XP\_009068753.1

KIKCSFTIPCSFLLQCLEDLNLRKLNSRLFVIRGQPADVFPRFLKEWNIAKLSIEYDSEFPFGKERDAAIKK  
LASEAGVEVIVRISHTLYDLKIIELNGGQPLTYKRFQTLISRMELPEMPVETITPEVMKKCTTPVSDDHDE  
KYGVPSLEELGFDTDGLPSAVWPGGETEALTRLERHLERKAWVANFERPRMNANSLLASPTGLSPYLRFGCLS  
CRLFYFKLTDLYKKVKKNSSPPLSLYGQLLWREFFYTAAATNNPRFDKMEGNPICVQIPWDKNPEALAKWAEGR

TGFPWIDAIMTQLRQEGWIHHLARHAVACFLTRGDLWISWEEGMKVFEELLLDADWSVNAGSWMWLSCSSFFQ  
QFFHCYCPVGFRRTDPNGDYIRRYLPVLRGFPKYYIDPWNAPEGIQKAAKCIIGVNYPKPMVNHAEASRLN  
IERMKQIYQQLSRYRGLGLLATVPSNPNGNGGMLGYSPGESMSGCGSTGGAQLGTGDGHTTVVQSCALGDSH  
TGASGIQQQGYCPASSILHYAHGDNQQSHLLHAGRTALGTGISAGKRPNPEEETQSVGPKVQRQSTN

>Acanthisitta\_chlo\_\_XP\_009072123.1

MQESGRAELEAAVPAPPGRSVGGHTAVCLLRCDLRAHDNQVLHWAQDNADFIIPLYCFDPRHYLGTHCYGFPK  
TGPHRLRFLLESVKDLRETLKKKGSTLVVRKGKPEDVVHDLIAQLGSVS AVAFHEEATQEELDVEKGLCQVCR  
QHGVKIQTFWASTLYHRDDL PFKPITRLPDVYTHFRKAVESEAKVRPTLRMAEQLKPLTPGVEEGCIPTMEDL  
GQKDPVADPRTAFPCSGGETQALMRLQYYFWD MNLVASYKETRNGLVGMDYSTKLAPWLALGCISPRYIYEQI  
QKYEKERTANQSTYWVLFELLWRDYFRFVALKYGKRIFSLRGLQSKEISWKKDLQLFDCWKEGKTGVPFVDAN  
MRELVATGFMSNRGRQNVASF LTKDLALDWRMGAEWFEYLLVDYDVCSNYGNWLYSAGIGNDPRDNRKFNMIK  
QGLDYGNGDYVRLWVPELQGIKGADIHSPWALSSAALSQAGVTLGETYPQPVVTAPEWSRHINQRPGGSLHP  
RGRRGPAQVPVQHKDRGIDFYFSRKKDVC

>Acanthisitta\_chlo\_\_XP\_009083471.1

FKYNKKRVRLISQGS DLKDDARCILYGSGAPMAGKSPDNWAFLYAQLRALKQELPLHVCFLVPKFLEATLRH  
YGFMLRGLREVAEECAELNISFHLLLG YAKDVLPTFVVEHGVGGLVTD FSPRLRPRQWVEDVGQRLPEDVPFA  
QVDAHNI VPCWVASPKQEYSARTIRGKIHAQLPEFLT EFPPIVHHPYPPSCPAEPIAWEACYSSQLQVDHTVKE  
VEWATPGTTAGLAVLKS FIAERLKS FSSHRNDPNKAALS NLSPWFHFG EFSTQRAI LEVQKHRHKYKESVDAF  
VEEA VVRRELAENFCYYNENYDSVQ GAYDWAQTTLRLHAKDKRPYLYDLQELEQGTTHDPLWNAAQIQMVQEG  
KMHGFLRM YWAKKILEWTRSPEEALRF AIYLNDRYELDGRDPNGYVGCLWSICGIHDQGWAERAIFGKIRYMN  
YAGCKRKFDVDQFERRYAPAASQ

>Acanthopagrus\_latu\_\_XP\_036936079.1

MSTARTVICLLRNDLR LHDNELFHW AQRNAEYIVPLYCFDPRHYVGTHNYNL PKTGPFRLRFLLD SVRDLRNT  
LLNKGSNLVVRGKPEDVVADLIKQLGSVSTVAFHEEITSEELNVEKRVKDVCAQM KVKVHTCWGSTLYHRDD  
LPFHHSRLPDVYTQFRKAVETQSKVRPVFPTPEQLKPLPQGLEEGAVPTAEDLQQTEPLADPRSAFPCSGGE  
SQALARIKHYFWD TDAVATYKETRNGLIGVDYSTKFAPWLAMGCISPRYIYHQIQQYEKERTANQSTYWVIFE  
LLWRDYFKFVAVKYGDRLFQIEGLQDKSIPWKKDMKLFDAWKEGRTGVPFVDANMREVAMTGFMSNRGRQNV  
SFLTKDLGLDWRMGAEWFEYLLIDHDVCSNYGNWLYSAGIGNDPREN RKFNMIKQGLDYDNGDYVRQWVPEL  
QGIKGADV HAPWTLSSAALSHAVTLGETYPTPIVMAPEWSRHVNKKPSGTGPSRGGKGPSHTPKQHRDRGI  
DFYFSKGGKQ

>Acanthopagrus\_latu\_\_XP\_036938635.1

MSGKKRNSNSAAAGPRAKQQKVAAMKEEKMEEKRERAPGWLQDFLQQQRAEGKEIKLNKKRIRVISDTEKIKQ  
GSEGVLYWMSRDHRVQDNWALIH AQLRAVKENLPLHVCACLNVPKSELSTLRHYSFMLKGLEEVAEECKRLNI  
QFHLLHGTAGEVLP GFVSDRS LGAVVTD FSPLRGPLQWLEDIKKKLPKDIPLIQVDAHNVPCWVASPKLEYA  
ARTIRGKITKVLSDFLTDFPPVEKH PYTATRTAKPVDWEQTLASLEVDRIVGETEWAKPGTKAGTAMLESFID  
LRLKIFDTRNDPNT PALSQ LSPWIRFGHLSAQRVALQVQHSGKKAGVTVSSYIEELVVRRELTDNFCFYNNK  
YDSVEGAYEWAQKTLRDHAKDKRPYIYTREQLEKAKTHDKLWNAAQYQMVTEGKMHGFLRM YWAKKILEWTSS  
PEEALSIALYLNDRYELDGQDPNGFVGC MWSICGVHDQGWAERP IFGKIRYMN YKGCLRKFDVARFERTYSPK  
NL

>Acanthopagrus\_latu\_\_XP\_036952501.1

MAHTCVHWFVRKGLRLHDNPALMAALRDCKELYPVFVLDPNLHNRTC VGINRWRFLIGALKDLD RSLRKLNSRL  
FVVRGKPEDVFP TLFNEWKVTKLTYEYDTEPYSVSRDKVTALAKEHGVEVIYKVSHTLYDIDRIIEENNGKP  
PLTYNRMQAIVKTLGPPKKPI PAPT MENMKDVQTPCSENHKKKYGIPTLEELDHDAAALGEDKFP GGGEQ EALR  
RLDEHMKRTGWVCGFEKPQTS PNSLSPSTTVLS PYVTFGCL SARTFWWRLTDVYQ GKHS DPPPVS LHGQLLWR  
EFFYTASVGIPNFNMEGNSVCTQVDWDTNPEYLA AWAREARTGFPFIDAIMTQLRQDGWIHHLARHAVACFLT  
RGDLWINWEEGQRVFEELLLDGDWALNAGNWQWLSASTFFHQFFRVYSPVAFGKKTDKNGDYIKKYLPLLKKF  
PAQYIYEPWKAPHSVQQAAGCIVGKDYPHPIVQHEVISKTNIQRMKLAYS KR SADPAASPSKKQGVKRKASPV  
VDMLKKKNKTN

>Acanthopagrus\_latu\_\_XP\_036962465.1

MKDHQLSTPSQDSP LQQPGDRPNQRRSVQLASVSQPQGS SHAQLADVVGRRKNTQSSQ GAPVWKSSQPQTTOE  
TELQESAHVYKCNKETPGTCKAECVSRLSGSVSKQDTVEKGNQMMEGELTESQKPKRSKNRRQRRKGAGQHV  
VGLPCSPSAQPPVLLWFRRDLRLCDNPALIGSLEVGA PVI PVFIWSP EEEEEGPGITVAMGGACKYWLHQALSC  
FSLSLENI GSHLVFLKANRERSGVGSSVQTVKELVKETGARTVVANALYEPWLKERDDAVVSALQKDGV ECKM  
FDSYCLRD PYSVSTEGVLRGIGSVSHFMNCCSQNPGSALGAPLDPPVSLPAPS NWPQGVSLDILGLARMPRR  
KDGT TIDWAANIRKAWDFSEEGA HARLEAFLQDGVYRYEKESGRADAPNTSSLSPYLHFGQLSPRWLLWDAKE  
ARCRPPKFQRKLAWRDLAYWQLTLFPDLPWESLRPPYKALRWSSDRGHLKAWQRGRTGYPLVDAAMRQLWL TG  
WMNNYMRHVVASFLIAYLHLPWQEGYRWFQDTLVDADVAIDAMMWQNGGMCGLDHN FVMHPVDAAMTCDPCG  
TYVRKWCP ELADLPDEL IHKPKWCPASMLRRSGVVF GQTYPERVSDLEERTQSLQDVAVVRKKFGQYVDKR  
SGCDLVPLPQRLVSEALGLSHSDGGVVT TGKQFLLPVITRMEFKHQLEDPDADAASN PYNAVLKGYVSRKRDE  
TIAFLNERDFTASVMYEGTQRRERLES DYRRMEGLPRPAAPRGRARRTP TAKDRFSVVP GGAVTS LR

>Acanthopagrus\_latu\_\_XP\_036963662.1

MVVNTVHWFRLRLHDNP SLRESIRGADSLRCIYILDPWFAGSSNVGINRWRFL LQCLEDLDASLRK LNSRL  
FVIRGQPTDVFPR LFKEWQINRLSYEYDSEPF GKERDAAIQKLACEAGVEVMV RTSHTLYDLSRI IELNDGHP  
PLTYKRFQGLIDRMDA VELPAETVTLE VIRKCDTPI SDDHDDKFGVPSLEELGFD TDGLTTAVWPGGETEALM  
RLERHLERKAWVANFERPRMNAN SLLASPTGLSPYLRFGCLSCRLFYFKLTDLYRKVKNNNPPLSLY GQLLW  
REFFYTATNNPCFDMEGNPM CVQIPWDRNPEALAKWVEGQTGF PWIDAIMTQLRQEGWIHHLARHAVACFL  
TRGDLWLSWEEGMRAFEELLIDADWSVNAGSWMWLSCSSFFQ QFFHCYCPVGFGRRTDPNGDFIRRYLPVLKG  
FPAQYIYEPWNAPEELQKSVKCIIGVHYPKPMVNHA EASRINIERMKQIYQQLSCYRGLGLLATIPVNP HNST  
NRSNVGRVNAGTSRVPDRPSENLPMLGETSRTERLHAAQKRRCEDPPLESSCKSWRQSK

>Acanthopagrus\_latu\_\_XP\_036963795.1

MVVNSVHWFRLRLHDNPALQEALNGADTVRCVYILDPWFAGAANVGINRWRFLLEALEDL DSSLKKLNSRL  
FVVRGQPTDVFPRLLKEWKVTRLTFEYDPEPYGKERDGAIMKMAQEFGVETIVRNSHTLYNL DRIIEMNNNSP  
PLTFKRFQTIVSRLELPRRPLPPITQQQMDKCCTKIADNHDQLYSIPSLEELGFRTEGLPPAIWRGGESEALD  
RLNKHLDKKVWVANLEHPRVNTCSLYASPTGLSPYLRFGCLSCRVLYYNLRELYMKLRKRCSPPLSLFGQLLW  
REFFYTAATNNPNFDRMDGNPICVQIPWDQNPEALAKWAEGR TGFPWIDAIMTQLRQEGWIHHLARHAVACFL  
TRGDLWVSWESGMRVFEELL LLDADWSVNAGSWMWLSCSAFFQ QFFHCYCPVGFGRRTDPNGDYIRRYIPILKD  
YPNRYIYEPWNAPE SVQKAANCVVGVDPKPMINHAEGSRLNIERMKQVYQQLSHYRGLSLLASVPTIQEEAE  
PPMTDESQTSSGPDSPPRGPADSEAAGCSTAPDSSTVCASSTYALHPDLKDKGDNYPSKKPYTSSGSLTQCSA  
AITSTSASHSPCTTAPLSPAQSPLSRSKPSSPSSSCPTFSESLSP TTTTPTQTSSLGQRRKGLAHKVRRSQRQR  
GRQSWTPAPREGGRKLEEEEREETGWEERMEEDMEQDEERMEEEPSEETAGRQQ

>Acipenser\_ruth\_\_RXM29285.1

MAEKPGKPRKTKDENGNA GKRQKQVVEGGRQAGSSSGREAKAARKQEPGKRETTLWGSSGDEL SNTGARKKRR  
LGGGDAVTSPPGGVGGLASSIKESRLQAGPSVKEFEFNKKRVRLISEAVEMKDGSEGIVYWM SRDQRVQDNWA  
LLYAQHLALSHELPLHVCFC LVPFRFLDATINGFGLRGLEEVAK ECAELNISFHL LTGYAKDVLPEFVQMRG  
AGGVVTD FSPLRVPLQWVQDVKERLPRDVP LQVDAHNIVPCWVASEKQ EYGARTIRKKIHDK LSEYLTEFPP  
VLRHPHGAGCEVEAVDWEQARSSLEVDRSVKEVDWARPGTEEGLAMLESFIKERLKLFGSERNNPNR PALSNL  
SPWFHFGQVSVQRAVLEVRKCGSKHWQSVHSFVEEAVVRRELADNFCYYNKNYDRVEGASDWAR KTLQDHAQD  
ERSHLYSRAQLEEGKTHDPLWNA AQMHGFLRMYWAKKILEWTSCPEEALETALYLNDRYELDGRDPNGYVGCM  
WSICGIHDQGWGERPVFGKIRFMNYAGCKRKFDV GQFERKYHPEKSTV

>Acipenser\_ruth\_\_RXM33382.1

MVVNTVHWFRLRLHDNP SLRESIQGADSI RCVYILDPWFAGSSNVGINRWRFL LQCLEDLDASLRK LNSRL  
FVIRGQPADVFPR LFKEWNINRLSFEYDSEPF GKERDAAIKKLACEAGVEVMVQISHTLYDL DRIIELNGGQP  
PLTYKRFQTLISRMKTLET PVESITVEVMGKCTTPVSDDHDDKFGVPSLEELGFDTEGLPSSAVWPGGETEAL  
TRLERHLERKAWVANFERPRMNAN SLLASPTGLSPYLRFGCLSCHLFYFKLTDLYKKVKKNSSPPLSLY GQLL  
WREFFYTAATSNPRFDKMEGNPICVQIPWDKNPEALAKWAEGR TGFPWIDAIMTQLRQEGWIHHLARHAVACF  
LTRGDLWLSWEEGMKVFEELL LLDADWSVNAGSWMWLSCSSFFQ QFFHCYCPVGFGRRTDPNGDYIRRYLPILR  
GFPAKYIYDPWNAPE SVQKIAKCVIGVHYPKPMVNHA EASRLNIERMKQIYQQLSCYRGLGLLASVPSNP SGN  
GNGGMMGLSPGEDMHGGTPVEVGKGNAGMQQOVTRQYTPV

>Acipenser\_ruth\_\_XP\_033851735.2

MKHSSIHWFRKGLRLHDNPALLAALRDCAEIRPVFI LDPWFPRNTRVGINRWRFLLDAL KDLDGSLRKLNSRL  
FVVRGKPTETFPRLFRQWKVTQ LTFEMDTEPYSRQDAEVVRLAEEHGVEVIQKVSNTLYDSERVIVENDGTP  
PLTYKRLQTVLSFLGLPKRPVPAPKLEDMDKVHTPCSDSHEEEFGVPTLEELGQDPLKAGPHLYPGGEGEALR  
RLDQHMQRVAWVCNFKK PETEPNTLTPSTTVLSPYMKFGCL SARTFWWRLTDVYRGKKHSEPPVSLHGQLLWR  
EFFYTAGAGIPNFHRMEGNSVCVQVDWDTNEEHLAAWREGRTGYPFIDAIMTQLRSEGWIHHLARHAVACFLT  
RGDLWISWEEGMKVFEELL LLDADWSLNAGNWQWLSASAFFHQFFRVYSPVAFGKKT DKKGDYIRKYIPLLRKF  
PVEYIYEPWKAPLSIQERAGCIVGRDYP RPIVEHDIVSKRNVQRMKAAYARRAAPDSETRAVKTGAKRKADSV  
ADRQRN

>Acipenser\_ruth\_\_XP\_033909724.2

MVVNSVHWFRLRLHDNPALQRALEGANTVRCVYFLDPWF AAGTTDVGINRWRFLLES LQDLDTSLRKLNSR  
LFVVRGQPANVFPSLLKEWNVTRLTFEYDSEPF GKERDAAIKMAQELGVEVAVKNSHTLYNL DRIIELNKNS  
PPLTYKRFQAIISRLELPKKPVGTVTGEQMERCTGITENHDEHYGVPSLEELGFKTASLGPAKWKGGETEAL  
RRMDKHLEKAWVASFERPKIDVNSLIGSQTGLSPYLRFGCLSCREFYRLL ELYKKVKKSNSPPLSLY GQLL  
WREFFYTAATNNPKFDRMQGNPICVQIPWDRNPEALAKWAEGCTGYPWIDAIMTQLRQEGWIHHLARHAVACF  
LTRGDLWISWESGMRVFEELL LLDADFSVNAGSWMWLSCSAFFQ QFFHCYCPVGFGRRTDPNGDYIRRYIPKLK  
KYPNKYIHEPWNAPE SVQKAARCIVGVDPKPMIKHAEASRLNIERMKQIYQQLSHYKGLSLLASVPSFSEEL  
GSTITDRLHGDSSNSGSSMVWHSRTSPLGKRDRPSEPDC EEKCTRPKILCGCPTNGTNIQELQVENS KRMQKN

>Acropora\_digiti\_\_XP\_015758632.1

MKDNPVCLQVNW DKNEEFIHAWTEARTGYPFIDAIMTQLRREGWIHHLARHAVACFLT RGDWISWEEGLKV F  
ENLLLDH DWSLNAGNWLWLSASAFFHAYFRVYSPVAFGKKTDPNGQYIKKYLPALKKYP AKYIYEPWKAPLTV

QQAAGCLIGKDYPKPIVDHTKVVKVNLAKMKDAREKQYGGSSSEQGAKKDEKSSSLKRKMREKPPSPEKKMKKI  
TDFLKG

>Acropora\_dig\_XP\_015760686.1

MSLNLSVEDNNSVVGAEKRQGKLKAKHAIHWVRKDLRLHDNPSSLLEAVKGS DTVRIIYVLDTKVDHATGIGL  
NLWRFLQLSLEDVDDSLRKLNSRLFVVRGQPADVFPRLFREWKTSTFLTFEEDSEPFGREKDAAIRLLAQESGV  
EVAVGRSHTLYDPQLIIKHNSGTAPLTYKKFLAIVRSLGNPEHPCATLDVHLLGGCSTPVSEDHEEKFGVPSL  
KELGLDVAKLSTEIWHGGETEALIRLDRHLERKAWIASFEKPKVTPNSLFPSP TGLSPYLRFGCLSPRLFYHR  
LSELYRKVKCKDPPISLYGQLLWREFFFTVAANNPNFDQMDENPVCLQIPWTANPEWLKKWEQVFMHFL

>Acropora\_dig\_XP\_015763606.1

MASQPPAKRRKEESSENGDDILASCMakraQVCASVADFKFNKKRVRLLSKSTDISDDCKAIAYWMWRDQRVQ  
DNWALLYAQRMALKQEVPLVVCFLPSKYLHSTFRQYSFMIGLQQVEKELASLNINFMHMLLGEPNIVLPDFV  
KSENIIGGIADFTPLRKPMKWLNDVMDKLPKNVPVCQVDSHNIIPCWQASPKLEYGARTIRPKIHNMREFLT  
EFPFVIKHPHAGKASIKTDWKADEFIEVDNRVQEVNWAEPGTKAGLEMLESFCKDRLKFFATDRNNPTKEAL  
SDLSPWFHAGQISVQRAILRVREFRGSSKDSVETFIEEAVVRRELADNFCFYNQEHYDSIKGAKDWAQKTLND  
HAADKREYLYTREQLEKGQSHDDLWNAQLQLVNEGKMHGFLRMYWAKKILEWTESAEEGLEISLYLNDKYSL  
DGTDPNGYVGCMMWSVCGIHDQGWAERPVGFKIRYMNYNGCKRKF DVGGEFVRKYGATTSSKEADGPAKKRKKAK

>Acropora\_dig\_XP\_015773600.1

MEDKKPRTSLHWFRKNLRLHDNPALCEAIKESDDFLALYILPPSVPDGNIAANRWNFLIECLEDLNRSLASVG  
SRLLVVQGYPAQVIPKLLKRLHVTKLTFESESEPFQKQDAVITHLAESMGVEVVSCTSH TLYDVGVLEANN  
NVTFMLFDSFLDVVATLGPPEPPTQTVSQDMSSLLHKANMFGDCDIPAVEDLGIDRAKVTCQEIWCGGESEA  
LQKLHAFLEKELVDVDFQVESVSEFLHGFTDKLSPYLRFGCLSPRTYYHALLD TYYTAKKQYPPQSLFFSLLW  
RDFYFVLGSSNPTLNQMEMNPLCLQINWDQNVVALEKWKMGQTGF PFVDAIMRQLCKEGWISSLARQVVG SFL  
TQCGMMSWEEGFKIFGELQLDAEWSLSAGSWLSISGSSFDQNRALFCPVETAKKLDPMGEYIRKYVPEVKD  
LPLEYVFEPWTAPSAVQEAAGCVLGRNYPLPLADHKEQQKVCMQRLKELAQNLGTDMRGRERGH TSVHLFRKD  
LRLHDNPCLSCLEGSTTFYPVYVLDTEAARKSKISP NRWNFLLECLRDLDQLAALGSRLFVVRGREVEVIS  
KLIQEWGVTRISFESDSEPFQVQDAVIQKLAEEAGVEVLSKTSHTL FKPEDIHANHGVAPMIFEDFLEV LK  
DNLLKAPSPVKQVDRQLFGCCVTPVADHQTNFGLPELSELGVRDTRLVTSSCLWKGGEQEALRRVLLFEKQVP  
NTVISMRFMQVWEDSVEYLKRWKGTTGF PWIDAIMRQLRTEGWIHNIARRAVASFLTRGCLWVNWEEGFKV  
FDEFQLDAERSLNVGNWLWVSTSTFVKGPVPWFPCVGVGKKIDPTGEYVRKYVPEIRNLPT EYIFEPWLT PRD  
LQRSYGCVIGRDYPAPIVNHVKQRAICVQRMQELAFKLASK

>Acropora\_dig\_XP\_015775701.1\_cry\_DASH-1

MFHVPRCSNCFVLCSSLLRRRGSFRSVAASRRIKVTLAMDAQTGNSIAIYLIRNDLRVHDNECLSWAQQNADF  
VIPLFCFDKEIFGHGAETWHFKFPKTAIHRARFILESVVDLKD SLKKGSDLLLRSGQTMKEAVLGVIQLCHQ  
QSIQNL SLVYQREITKEEKDVEAELELCKKENVAVKSFWGLTLYHVEDLPFASVRHLPD TYTEFRKSVEARG  
RVRPVI PAPNR LKPIPDFITSDNMGGIPTLTEL VKDQGTTPDARSAFPFCGGETAAIERMDNYLWTTDNVSKY  
KETRNLIGAEYSTKLSPWLAVGALSPRKIYECVKQY EKERTANQSTYVWLFELLWRD YFKFVCFKFGDSV FY  
LSGIMKKGGLSWKQDMSSFDKWRFGQTGV PFVDANMRELLYTGWMSNRGRQNVASFLVKDLGLDWRLGA EWFE  
SLLVDHDVCSNYGNWNYSAGIGNDPREN RKFNMIKQAFDYDADGDFVRLWVPELVDLKGARVHIPWTLT SSEL  
KVAGITLGESYPRPMVNPPPEWKRHTSKVKGSGNSTRRHNRGIDFYFKSPKDTNP SKKRH

>Acropora\_mil\_ABP97099.1\_cry\_CRY2,\_

ICVQRLKDLCFSLDILGHTSLHWFRKDLRLHDNP SLRECLRN SKVFYGVYFLPPSEAKQGSVSLNRWGFLLES  
LRDLDTSLVECGSRLFVIRGNPVEMLPNLFKKWNINQMSFEVDSEPYSNSRDLVISHLAKENGIEVISRV SHT  
LYDPRILRGLSSGIVPLLFDEFKESVLQKRQPEKPV PKVGRKLF GACVTPVGS DHQQCYGVPRLDEIGGKFSK  
SGSVCS ELYKGGESEALKRMETALQWMVKNDFT EPEITIHSLLSATHLSPYLRGCLSPRLLHQRI TE EYIK  
SKGVSPPEL FVKLLWREFF FVVGQIPDAHEMINNPISLEIPWEDSVEYLERWKKGTTGF PWIDAIMRQLRT  
EGWIHNIARRAVASFLTRGCLWVNWEEGFKVDEFQLDAERSLNVGNWLWVSTSTFVKGPVPWFPCVGVGKKI  
DPTGEYVRKYVPEIRNLPT EYIFEPWLT PRDLQRSYGCVIGRDYPAPIVNHVKQRAICVQRMQELAFKLASKI  
RWRQVLNVI

>Acropora\_millep\_XP\_029185027.1

MATKTSRVHNTIHWFRKGLRLHDNQSLMEACETSVTLRPVFFIDPDYVKHGNMGFNRWRFLIESLNDINDSLE  
KIGSRLFVVHGKPEIEFPKLFKWEVTKLTFEFDHEPDGRARDSKITKLA AQNGIEVQTRICHSLYDLDEIIE  
KNDGRAPLTYKRLCSVVSLLGPPSKPVPTVDQETFKGCSTPASESDEKDYHVPTLEELGIERPHQTS GILFPG  
GETEALRRLNEHMEKEDWVNKFEPNTSPNSLEPSTTVLSPYVMFGCLSARLFYHKLSEVYARARKHSQPPVS  
LHGQLLWREFFYT VAYGTPNFNMKMDNPVCLQVNW DENEEFIHAWTEAHTGYPFIDAIMTQLRREGWIHHLAR  
HAVACFLTRGDLWISWEEGLKV FENLLLDHDWSLNAGNWLWLSASAFFHAYFRVYSPVAFGKKTDPNQYIKK  
YLPALKKYPAKYIYEPWKAPLTVQQAAGCLIGKDYPKPIVDHTKVVKVNLAKMKDAREKQYGGSSSEQGAKKDD  
KSSSRKRKIREKPPSPEKKMKKITDFLKG

>Acropora\_millep\_XP\_029212918.1

MFHVQRCNNRFSVFSSLLRRGGSFRSVAASRRIKVTLAMDAQTSNSIAIYLIRNDLRVHDNECLSWAQQNADF  
VIPLFCFDKEIFGHGAETWHFKFPKTAIHRARFILESVVDLKD SLKKGSDLLLRSGQTMKEAVLGVIQLCHQ

QSIQNLSLVYQREITKEEKDVEAEELLELCCKENVAVKSFWGLTLYHVEDLTFASVRHLPDITYTEFRKSVEARC  
RIRPVIAPNRLKPIPDFITSDNMGGIPTLTTELVKDQATTPDARSAFPFCGGETAAIERMDNYLWTTDNVSKY  
KETRNLIGAEYSTKLSPLAVGALSPRKIYECVKQYKERTANQSTYWVLFELLWRDYFKFVCFKFGDSVFY  
LSGIMKKVGLSWKQDMSSFDKWRFGQTGPVFDANMRELLYTGWMSNRGRQNVASFVLVKDLGLDWRLGAEWFE  
SLLDVHDVCSNYGNWNYSAGIGNDPRENRKFNMIKQAFDYDADGDFVRLWVPELAGLKGAKVHIPWTLTSSSEL  
KVAGITLGESYPRPMVNPPPEWKRHTSKVKGPGNSTRRHNRGIDFYFKSPKDTNPSSKKRH

>Acropora\_mil\_XP\_029187851.1\_photolyase

MASQPPAKRRKESSENGDDILASCMakraQVCASVADFKNKKRVRLLSKSTDISDDCKAIAYWMWRDQRVQ  
DNWALLYAQRMALKQEIPLVVCFLPSKYLHSTFRQYSFMIKGLQQVEKELASLNINFHMLLGEPNVVLPDFV  
KSENIGGIADFTPLRKPIKWLNDVMDKLPKNVPVCQVDSHNIIPCWQASPKLEYGARTIRPKIHNMREFLT  
EFPFVIKHPHAGKASIKTDWKAVDEFIEVDNRVQEVNWAEPGTKAGLEMLSESFCCKDRKFFATDRNNPTKKAL  
SDLSPWFHAGQISVQRAILRVREFRGSSKDSVETFIEEAVVRRELADNFCFYNQEHYDSIKGAKDWAQKTLND  
HAADKREYLYTREQLEKGQSHDDLWNAQQLLVNEGKMHGFLRMYWAKKILEWTESAEEGLEISLYLNDKYSL  
DGTDPNGYVGCMWSVCGIHDQGWAEPRVFGKIRYMNYNGCKRKFVDFGEFVRKYGATTSSKEAGGPAKKRKKAK

>Acropora\_mil\_XP\_029194452.1\_cry-1-like

MSLNLSVEDNNSAVSAEKRRQGLKAKHAIHWVRKDLRLHDNPSSLLEAVKGSDTVRIIYVLDTKVDHATGIGL  
NLWRFLQLQSLLEDVDDSLRKLNSRLFVVRGQPADVFPRLFREWKTSTFLTFEEDSEPFGREKDAAIRLLAQESGV  
EVAVGRSHTLYDPQLIIKHNSGTAPLTYKKFLAIVRSLGNPQHPCATLDVHLLGGCSTPVSEDHEEKFGVPSL  
KELGLDVAKLSTEIWHGGETEALIRLDRHLERKAWIASFEKPKVTPNSLFPSPGLSPYLRFGCLSPRLFYHR  
LSELYRKVKCKDPPISLYGQLLWREFFFTVAANNPNFDQMDENPVCLQIPWTANPEWLKKWEQGQTGFPPWIDA  
IMIQLKQEGWIHHLARHAGVCGFLTRGDLWISWEEGMKVFERWLLDAEWSLNAGNWMWLSCSAFFQQFFNCICP  
VGFGRKLDPNGDYVRKYLPLVKGFPAKYIHAPWTAPENVQRAARCIIGKDYPRPIVDHKKVSTANLEKMRNVF  
KALLRYKESTVATSEKSDGSKDKQAKLKQMLNLEDKENR

>Actinia\_ten\_AOQ25781.1\_photolyase

MCSVQVNRPVILALYTEFKRVLHLFNLPNKALYTRKPRSCWKSSVLLRFLSKSYESNPSNAIKTMTEPPNKKAK  
KKEHKLDDSDADDDILRRYHKKRKAVCESVLDFKFNKKRVRLLSKVTEVNDDCKGIVYWMWRDQRVQDNWALL  
YAQRLALKQQVPLHVCFLPKTFLDAAIRKYGFMLKGLKHVEKELSELDISFHLCLGEPDIVLPELIKKNFNG  
GVVCDFCPLRKPMQWVDKLIKALPKSIPVCQVDAHNIIVCWETSPKLEYGARTIRPKIHKVLQSFLETFPPVI  
KHPHVPKVKVKETDWAAYDFIDVDDTVKEVDWAEPGTEAGLKMLEEFCQRLKHAFATSRNDPTKKAISNLSP  
WFNTGQISNQRTILKIREFRGKYKESVESFIEESVVRRELSNFICYCNDNYDSIDGTNDWAKKTLEDHAGDKR  
EPLYDRETLETAKTYDDLWNAAQRLVCEGKLHGFLRMYWAKKILEWTKSPEVALADAIYFNDKYALDGDIDPN  
GYVGCMWSICGIHDQGWKERPIFGKIRYMNYKGCQRKFDVAAFVKRYKP

>Actinia\_ten\_XP\_031549143.1\_cry-1-like

MAGKKAHNTIHWFRKGLRLHDNPSSLKEAFESSVNIRPIYVLDSDDVQHGNIQVVRWRFVLQSLLEDLDRSLRKL  
NSRLFVVRGKPTVLFPLFKFKEWNITKLTFEVDTDGPARQRDAEIIKLANDAGVDVQKVSHTLYNIDDLVGLKN  
LGRAPSTYKSFQAVISSLGPPEVPIPTIETDVGVCCTPIEDDDHGLYGLPTLEEIGLTVXDESKEVLYPGGE  
TEALRRMHEYMAKEDWVCKFEKPNTPNSLEPSTTVLSPYLTFGCLSARLFYVQLSDIYSRAKKHSQPPVSLX  
GQLLWREFFFTTCAYNIPNFNRMEGNPVCLQIPWDKNDEYLKAWEEARTGYPFIDAIMTKLRREGWIHHLARHA  
VACFLTRGDLWISWEEGLKVFNLLIDHDWSLNAGNWMWLSASAFFHAYFRVYSPVAFGKKTDPNGDFIRKYI  
PILKRFPKYIIEPWNSPLNVQEKAGCMIGKDYPRPIEHSKAVAKNLARMKKAREAKYGSKESENPEKATKTS  
PSKRKSTSKDDKTAKKVRKITDFTT

>Actinia\_ten\_XP\_031550954.1\_cry-2-like

MVNSLHWFRKGLRIHDNQPLRDAIQXSTTFRAVFFLDRTTVRNAKVSVNRRWFLLLECLKDLNKLKEFGTRLY  
IVQGHPIDVFPRLIKEWGITRLTFEYDSEYPSPQRDLAVRRLAENEGVEVIVKSSHSFLDISRFVKENNGQAP  
ITFKQFHSLLRKVGLPEACVETVDKELFGSCVMPIEDDHDEKFGIPSFEELGLAVEEEKGPGVWVGGESQALK  
VFQTAIKELFESNEKNSKYSDDSPFPKSTKLSPYLRFGCISPRLVFHKMTKLASKVSNPAACFGIQKSLWRE  
FFFVIAASKNPALDKMCNNCMCLQFPWDKNNNSLERWKNKGTGFPPWIDAIMRQLRKEGWIHHLARQAVGCFLTR  
GCLWVSWEEGFKAFEEMQLDAEWSLNASCWLWLSCSAFFNSTPTPWFCPVNFGKKLDPAGNYVRKYVPEVRNL  
PTEYIFEPWLAPVEVQRQAGCVIGTDYPKNILDHDIARKICSNRMRDVYNGLVVKVSSAPGLGHNVVHWRKRD  
LRLHDNPALFEALPNCRTFYAVYIFDPVNIKAAKVSNRWNFLLECLRDLDNNLKKCGTRLHLVLRGQPTTIFP  
KLFWERNITKLTLESECEPFQQRDEAIAAEYGVEMSSRSSTLYSIDKILEMNGGKCPTLFKEFESIIR  
KLGPDPSPVDPVTRKCFSAICIPINGAHEARYAVPTLSELNIDESQVTCGDLWVGGESEALTRLTELEEKIFI  
GTKRESSPESAAALLPSRTQLSPYLRFGCLSPKMYKRLTMAYIKMSKPPPMPLYCQLVWREFFFTLASKNPN  
MDTIENNPLCLEIGWEHNEEALTCWKEGKTGFPPWIDAIMRQLRQEGWIHHIARQAVGCFLTRGCLWVSWEEGF  
KVFEELQLDAEWSVNSGSLWLSCSAFFHSQIPWFPCVSVGKKLDPGNYIRKYIPELRTMPNKYIYHPWTAP  
EGIQKAANCVIGKDYPKPIXDYVERRKVCLQRLKEVCCQIKTTTESAICTT

>Actinia\_ten\_XP\_031553703.1\_cry-1-like

MEENDSSQRRFQKTNSLYWARKDLRLHDNPALREALCCDTRFVVYILDTKSVEGSRIGLNLWRFLQLQSLLEEL  
DNSLRKLKSRFLVVRGQPADVLPKLFLEWNITKLTFGEDTDPFGKERDSAIQMLAREAGIDVIVRQSNLTLYDW  
PELIYQNGGKLTCSYKSFLNVIQTMAPPDLPEETITCNSPGLGYTPLDEDCFDKYEVPSEELGLDSSSKLCTE

AWHGGEIEALNRLNRHLERKAWIASFEHPKITPNSLHAMAHSVSPYLRFGCLSPRLFYSRLTDLYEKVKRRKP  
SISLYGQLLWREFLYMVSTNNPNFDMHNDPYCLQIQWRDDNCVEEDLQKWKLQGTGFPWIDAIMAQLRQEGW  
VHPMACYATACFLTRGALWISWEEGMKVFEELYLLDADWSVNAGNMMWYSCSAFSQHLYLPQCPVEFGKKLDEN  
GDYIRKYLPIKGFNSNEYIHEPWKAPCRVQKIARCMIGKDYPSPMFDQEEKRKQNMERIQKIIDSQQPSIEIQ  
QC

>Actinia\_ten\_XP\_031561645.1\_cry\_DASH-1

MASKSRVIIICLLRNDLRYHDNEVLCWAHKNADLVLPYCFDPRHFRGTWHFHFPGTGPFRRTKFLLESVRDLRQ  
KLQDVASNLVVRGKPEEIIIPSLITSINNESVKVEGISLQKEPTKEEIDVENAIEARSSVPVQKFWGLTLYHP  
DDLPFSEIKKVPNVYTEFRKNVERHSGVRSTIKMPDRMKPLPDGIEPGNIPTFDELGVKEPSQDSKSAFFPQGG  
ETSGLQRLQYYLFDTDYVAKYKETRNLIGQEYSTKFSTWLAHGCLSPRKIYEEIKKYEHQRTSNQSTYWVIF  
ELLWRDYFKFVAIKFGDRLFYLSGLLAKKVEWRQDENLFRAWKEGKTGVFPVDANMRELAATGFMSNRGRQNV  
ASFLTKDLKMDWRLGAEWFEYLLIDHDVCSNYGNWLYSAGVGNDRQDRKFNMVKQGLDYDPKGDYVRQWVPE  
LSGVPPGGDIHTPWRLSRASLAHASVSLGETYPMPIVMAPEWDRHSTKPKRDLSSQKRQSNQRKQKRGIDFYFS  
SNSNNH

>Acyrthosiphon\_pis\_NP\_001164532.2\_chryptochr

MTVAVHWFRNGLRLHDNPALIEAHNNAEKLITLFIETTFNPKWYGNPMRFLLESIDLNNNLALVGGRLY  
ILQGNPNVIFKMIKEKIGLHFITYEQDCAHLGRTRDEKVKSFCDENDIKCIETVSHTLWNPKSIIIEKNGGVPP  
FTFKQFQNTAKQIGHPPSPVGNVDWLSVIFEEELPASIQDEFKNLHNPTPETFGIYPEVPELTSTYRWYGGGT  
RALEQLKERLEYEKEAFVNGFYLPNQVNPDLSPSSLSAALRYGCLSIKRFYWELTKLFINKFEGDLLPMYS  
VTSQLIWRDYFYTMSIDNKNFGQIEDNPACISIPWNDIKIPENKKMLECWKTGKTGYPFIDAGMRQLMQEGWI  
HHVVRNSLASFLTRGDLWISWVEGLNHFMKYLLDADFVCSGNWIWVSSSTFEQLLDCPLCVPVSYGLRLDP  
SGEYIKRYVPELKNMPAQFLYEPWKCPESVQKQVGCIIIGKDYPCIVDHTIASKGNRKKMLALRVSMTNENRV  
PHCCPSDREEVQKFMYPDECMQQLPLENQDSKAYDIYKSH

>Acyrthosiphon\_pis\_NP\_001164573.1\_chryptochr

MQNKHTVHWFRKGLRIHDNPSLREGLINAKTFRCIFILDPWFAGASNVGINKWRFLQCLSDLDNSLKKLNSR  
LFVIKQQAELPKLFRQWGTNFTFEEDPEPFGRVRDQNIKVMCSEMGISVITRCSHTLYQLDKIINVNGGK  
APLTYHLFQKLECIDPPERAVPSIDKEFLGNAFTPIKYDHDEIFGVPTLEELGFKEINNITRHVWVGGETEA  
LIRLQCHLERKAFIASFGKPKMTPQSLVASPTGLAPYLKFGCLSTRLFFSELNELYKKIRKSQPPLSLHGQLL  
WRDFFYCASTNNPNFDRMVGNPICVQIPWDKNPRALSKWANGQTGYPWIDAIMIQLRQEGWIHCIAHAVACF  
LTRGDLWLSWEEGMKVFEDELLDADWSVNAGYWMWYSCSSFYQEFIHICYCPVRFGRKVDPNGDYIRRYIPALN  
NMPNQYIHEPWLAPESIQFSANCIIGIDYPLPIVNHINASKINLERMKLAYQQLSNCQPQLENGKLILISSLR  
R

>Acyrthosiphon\_pis\_XP\_001946012.1\_cry-2

MDKNDADVGRETTVHWFRKGMRLHDNPAFKLSCEAKNSNGERYKLRPIYIILDPYFRKYIRAGANRWRFLQQSL  
VDLDTTLRKLGLTRLYVIRGLPHEVFPDLFAKWNVKLLTFELDTPEYARERDNQVEQLARKHGVKVEQKVSHTI  
YNTELVLIRANGGSVPMTYQKFVSVVGSMPTRRPIAPDMLPSECLLDDDLNNPEFDVPTLDELTLKGFNPA  
ELKPCLYPGGEKEALRRLEEYMKNKTWCKFEKPNTSPNSLKPSTTVLSPYMKFGCLSASHFYRLKEVIGNS  
PHSKPPVSLIGQLYWREFYYTVGASTPNFDMVGNSICQVPWDNNPDALAWTNGKTGYPFIDAIMRQLRDE  
GWIHHLARHAVACFLTRGDLWISWEKGLAVFEELLLDADWSMNAGNMMWLSASAFFHQFFRVYSPVAFGKKTD  
KSGDYIRKYIPELAKYPDQYIYEPWSAPKSIQERAGCVGVVHYPKRVVVHEDVYKNNIAKMSLAYKSTKAGKS  
SNTKKSMDMSTSPDKKNIKKPKLK

>Acyrthosiphon\_pis\_XP\_001949151.1\_photolyase

MSGNEPLTKKFKKTISEVGTSTKSNFLNDVAAERNKTASSIMEFKFNKKRVRVLSEQKEVPEWAEGVIYWTFR  
DERIHDNWALLYAQKLAIKNVSLHITFCRLKQFLDCSLRHYKHIFQGLEELETECKSLDIQFHFLIGCAADI  
LPDFVKKHKLGAIIIVDFMPVREHISWTKQLADRIGSEVPVIQVDAHNIVPCWVASDKQEYSARTIRNKINNKL  
PEFLTEFPPIKHPFRSTFKAKPTNWDEADKTLEVDRSVSVPGKAGFKAGMSELEQFLKKRLPKYSTDRNN  
PVKDGLSKLSPWLHFGQISAQRCILEVSKLSKQYPDSVAAAYREEAIVRRELSDNFCFYNPKYDKIEGAPNWAQ  
TSLNEHRKDKRMFVYTRREELESSRTHDDLWNSAQIQLVKEGKMHGFLRMYWAKKILEWTDTPDRALADAIYLN  
DKYSMDGRDPSGFGVCMWSICGIHDQGWKEREIFGKIRYMNYAGCKRKFDINAFIARYGGMVHKYTKK

>Adineta\_ricc\_\_CAF0888048.1

MKRLAIVLFRYDLRLHDNELLVWAHANHDYVIHTYCFDPRQITDKTYKCDLVKCDKYRLKFLIETIEDLNLISL  
VNRGSDLQTYRDTPENVLGQLVQQFKGEFEISIGYHQEATKEETDVEKAIQQAKDNKLHVKEFWTSTLYHPD  
DLPYNNPKAFPDVFTQLRVALEKQHVQVRRVLNPPNAFKSPPDGLLKTTIPSLLDGFGYTNVTLHSNSVFILKG  
GESSGLAHLRSYIWEKNLVHSYKQTRNSLIGPENTTKFSAWLANGSLSPRQIFFELKSYESHQQRDAGYWI  
FELLWRDFFKFIAMKYGARLFYSRGLRQEPYAWKHDIKEYEAWRTGNTGIPFVDANMREIMATGWMSNRGRQN  
VASFLTKDLGIDWRYGAVWFESILIDHDVCSNYGNWIYVAGIGNDPRENHRHNMVKQGFYDPAGVFIRTWCP  
ELAQLSNEYIQTPLAPTHVLAEAGVELGVNYPRPMLVVPQWNQQFKNRRTTTQNHHTQQRGINFYFRNHDK  
RQ

>Adineta\_ricc\_\_CAF0918551.1

MPKRKSTMP TVDKREKKVSESDHNQTSEKDDNAEEKQKDELANKVAKTKTNTTVIDYFSIKPLIKAI DHVRTG  
ICTSVEDFHF NKTRVRPMNNVNHIPKDSQTILYWMSRDQRVQDNWAMLYAQRLALKQHLPLHVAFC LVPTFLA  
APLRAYR FMLKGLREVEQE CQQLNII FHLLTGQAEKVLPKFVEKYQVGTIITDFSP LRVPRQWVENVAKKIT T  
IPIVQVDAHN VVPCWYASTKLEYGARTIRNKLHKNMDEFFTEYPPVIKHPHTSPAHHQVKPTDWAADDSLQV  
DRTVDEVAWAVPGYTGGIEQLESFVNERVCNFALGRNDPNKGAISNLS PWIHYGQISPQRALLVIAKLRPKFK  
EACDSFIEEAFVRRELGDNYCYQENYDNINGAWDWA KKTLDNRNDKRTHVYSRDDLEYARTYDKLWNASQI  
QMIKEGKMHGFVRMYWAKKILEWTNSPEEAIEIAIYLNDKYNLDGRDPNGYVGV MWSICGIHDQGWRRP VF  
KIRYMNYDGCKRKFDVAKYENKYSSL

>Adineta\_stei\_\_CAF0714394.1

MKRLGIVWFRDDLRLHDNETFAWAHMNNDYVIHIYCFDPRQITVKTYKCDFVKTDKYRLKFLIETIEDLNTSL  
INKGSGLLTYRDT PENVLNQLIEQFKNIFEITIAFQQQVTQEETDVEKII RQLTIDNNIHVKEFWTLTLYHPD  
DLPYNNPKAFPDVYTQLRVALEKQGVRRRLIDIPNTFKPLPDGII STTVPNLSDYGYSNETIHTNSVFTLQ  
GESSGLTHLHNYIWNKNLIKSYKETRNSLTGPENSTKFS PWLSNGSLSPRKIFFEIKKYENEQNIHDAGYWI  
FELLWRDFFKFIAMKYGTRLFYGRGLKLEPYVWKHNSNEFEAWRTGNTGVPFVDANMREIMATGWMSNRGRQ  
VASFLTKDLGIDWRYGAVWFESILIDHDVCSNYGNWIYVAGVGTDPRENRHFNVVKQGFDDPNGIFVRIWCP  
ELARLPNEYIQT PWLAPAHILKEAGVELGVNYPRPIIIVPQWNQQFQNRKSIQNQHHTQQRGINFYFKNHEK  
R

>Adineta\_stei\_\_CAF0758554.1

MSKRKGTMP TINKREKKTSESDNNTSEKEDHFENEEEEQKNELAEKVTNTKTNTTIIDYFTIKPLQSAIDNIR  
KNICSSVND FHF NKTRVRPMNNMNIIPQDSQTILYWMSRDQRVQDNWAMLYAQRLALKQQLPLHVAFC LVPTF  
LAAPLRAYR FMLKGLREVERECQQLNIAFHLLTGQAE NVLPKFIEKYKVGTIITDFSP LRVPRQWVDNVAKKI  
TTIPIIQVDAHN VVPCWHASPKLEYAARTIRNKLHVNMTEFFTEYPPVIKHPVSPTHLQAKPTDWAADDSL  
QVDRTIDEVSWATPGYTGGIEQLETFINQRVANFAIGRNDPNKCVISNLS PWLHYGQISPQRALLIMAKLSK  
CKEACDSFIEEAFVRRELSDNFCYYQPNYDNINGAWEWAQKTLDNRNDKRTHIYSRDDLEYARTYDKLWNAS  
EIQMIKEGKMHGFLRMYWAKKILEWTNTPEEAIEIAIYLNDKYNLDGRDPNGYVGVIMWSMCGVHDQGWKERPV  
FGKIRYMNYDGCKRKFDVAQYEKRYSSL

>Aegithalos\_caud\_\_NWH83821.1

RFLQLSLEDLDNLRKLNSRLFVVRGQPTDVFPRLFKEWGVTRLTFEYDSEPF GKERDAAIVKLAKEAGVEVV  
IENSHTLYDLDR IIELNHGKPP LTYKRFQAIISRMELPKKPVSTVISQOMETCKVDIQENHDDVYGVPSLEEL  
GFPTDGLAPAVWQGGETEALARLDKHLERKAWVANYERPRMNANSL LASPTGLSPYLRFGCLSCRLFYYRLWE  
LYKKVKRNSTPPLSLYGQLLWREFFYTAATNNPKFDRMEGNPICIQIPWDRNPEALAKWAEGKTGF PWIDAIM  
TQLRQEGWIIHHLARHAVACFLTRGDLWISWESGVRVFD ELLLDADFSVNAGSWMWLSCSAFFQQFFHCYCPVG  
FGRRTDP SGDYVKRYLPKLKGFP SRYIYEPWNA PESVQKAACIIGVDY PKPMVNHAE TSRLNIERMKQIYQQ  
LSRYRGLCLLASVPSCVEDLSGPVTESASGQGCSTSTAARLSQADQASPKRKHGAE EPCPEELYKRAKVTGL  
PASEIPGKS

>Aegithalos\_caud\_\_NWH86447.1

KVDYDVC SNYGNWLYSAGIGNDPRDNRKFNMIKQGLDYDGN GDYVRLWVPELQGIKGADIHTPWALSSAALSQ  
AGVTLGETYPWPVVTAP EWSRHIPQRPGGSPHPRGRRGPEQHKDRGIDFYFSRKKDA

>Aegithalos\_caud\_\_NWH87675.1

MLHRTIHLFRKELRLHDNPVLLAALESSEALYPVYILDKAFLTSSMHIGALRWHFLLQSLEDLHKNLGQLGSC  
LLVIQGEYETVLRDHIQKWNITQVTLDAEMEPFYKEMEANIQR LGAELGFEVLSLVGHSLYNTERILDLNGGS  
PPLTYKRFLHILSLLDGPEVPVRNLTAEDFQRCRAPDPGLAE CYRVPLPVDLEISPESLSPWRGGETEGLQRL  
EQHLTDQGWVTSFTKPTIPNSLLPSTTGLSPYFSMGCLSVRTFFYRLSNIYAQAKHHS LPPVSLQGQLLWRE  
FFYTVASATPNFTQMAGNPICLQICWYKDAERLHKWKTAQTGF PWIDAIMTQLRQEGWIIHHLARHAVACFLTR  
GHLWISWEEGMKVFEELLLDADYSINAGNWMWLSASAFFHQYTRIFCPVHFGKRTDPQGN YIRKYLPVLKNFP  
SKYIYEPWTASEEEQKQAGCIIGQDYPPFMVNHKEASDHN LQLMKQVREEQHRTAQLTRDDADDPMEIKVKYD  
HSEETISKRKVRKVARMT E

>Aegithalos\_caud\_\_NWH88797.1

DNWAFLYAQRLALKQELPLHVCFC LVPKFLEATIRHYRFMLRGLQEVAEECAELNISFHLLLG YAKDVLPTFV  
VEQGVGGLVTD FSPRLRPRQWVEDVRERLPEDVPFAQVDAHNIVPCWVASPKQEYSARTIRGKIHAQLPEFLT  
EFPFVVRHPHPPSPCAEPIAWEACYSSLQVDHTVKEVEWATPGT SAGMAVLKS FIAERLKS FSTHRNDPNKAA  
LSNLSPLWHFGQVSTQRAILEVQKHRRNYKDSVDAFVEEAVVRRELAENFCYNNENYDSVQ GAYDWAQTTLKL  
HAKDKRPYLYSLQELEQGTTHDPLWNAQLQMVQEGKMHGFLRMYWAKKILEWTQSPEEALQFAIYLNDRYEL  
GRDPNGYVGKLQGLWSICGIHDQGAERPIFGKIRYMNYAGCKRKFDVDQFERRYAPAH

>Aegithalos\_caud\_\_NWH92449.1

KAWVANFERPRMNANSL LASPTGLSPYLRFGCLSCRLFYFKLTDVKKNSSPPLSLYGQLLWREFFYTAATNNP  
RFDKMEGNPICVQIPWDKNPEALAKWAEGRTGF PWIDAIMTQLRQEGWIIHHLARHAVACFLTRGDLWISWEEG  
MKVFEELLLDADWSVNAGSWMWLSCIHCYCPVGFGRRTPNGDYIRRYLPVLRGFP AKYIYDPWNA PESIQKA  
AKCIIGVNYPKPMVNHAEASRLNIERMKQIYQQLXLLATVPSNPNGNGGGLMGYSPGESMSGCGSTGGAQLG

TGDGHSVVQSCALGDSHTGTSGIQQQGYCQASSILHYAHGDNQQSHLLQAGRTALGTGISAGKRPNPEEETQS  
VGPKVQRQSTN

>Agelaius\_phoe\_\_NWZ04222.1

RFLQLQSLLEDLDNSLRKLNLSRLFVVRGQPTDVFPRLFKEWGVTRLTFEYDSEPFGKERDAAIVKLAKEAGVEVV  
IENSHTLYDLDRILIELNGHKPPLTYKRFQAIISRMELPKKPVSTVISQQMETCKVDIQENHDDVYGVPSLEEL  
GFPTDGLAPAVWQGGETEALARLDKHLERKAWVANYERPRMNANSLLASPTGLSPYLRFGCLSCRLFYRRLWE  
LYKKVKRNSTPPLSLYGQLLWREFFYTAATNNPKFDRMEGNPICIQIPWDRNPEALAKWAEGKTGFPPWIDAIM  
TQLRQEGWIHHLARHAVACFLTRGDLWISWESGVRVFDELLEDADFSVNAGSWMWLSCSAFFQQFFHCYCPVG  
FGRRTDPSGDYVKRYLPKLGKGFPSRYIYEPWNAPESVQKAAKCIIGVDYPKPMVNHAETSRLNIERMKQIYQQ  
LSRYRGLCLLASVPSCVEDLSGPVTDASAGQGCSTSTAARLSQADQASPKRKHEGAEEPCPEELYKRAKVTDL  
PTSEISGKSL

>Agelaius\_phoe\_\_NWZ06291.1

MLHRTIHLFRKELRLHDNPVLLAALESSEALYPVYIILDRAFLTSSMHIGALRWNFLLQSLLEDLHKNLKGKLGSC  
LLVIQGEYELVLRDHIQKWNITQVTLDAEMEPFYKEMEANIQRLGAELGFEVLSLVSHSLYNTQRILDLNGGS  
PPLTYKRFHLHLSLLGDPEVPVRNLTAEDFQRCRAPDPGLAECYRVPLPVDLKISPESLSPWRGGETEGLQRL  
EQHLTDQGWTSTFTKPRITIPNSLLPSTTGLSPYFSGCLSVRTFFYRLSNIYAQAKHSLPPVSLQGQLLWRE  
FFYTVASATPNFTQMAGNPICLQICWYKDAERLHKWKTAAQTGFPPWIDAIMTQLRQEGWIHHLARHAVACFLTR  
GDLWISWEEGMKVFEELLLDADYSINAGNWMWLSASAFFHQYTRIFCPVRFGKRTDPQGDYIRKYLPIILKNFP  
SKYIYEPWTASEEEQKQAGCIIIGQDYPFPMVNHKEASDHNLLQLMKQVREEQHKTVQLTRDDADDPMEIKVKRD  
HSEENISKGVARTAE

>Agelaius\_phoe\_\_NWZ09730.1

MGVNAVHWFRLRLHDNPALRECIQGADTVRCVYILDPWFAGSSNVGINRWRFLQCLELDANLRKLNLSRL  
FVIRGQPADVFPRFLFKEWNIAKLSIEYDSEPFGKERDAAIKKLASEAGVEVIVRISHTLYDLDKIELNGGQP  
PLTYKRFQTLISRMELPEMPVETITPEVMKKCTTPVSDDHDEKYGVPSLEELGFDTDGLPSAVWPGGETEALT  
RLERHLERKAWVANFERPRMNANSLLASPTGLSPYLRFGCLSCRLFYFKLTDLYKKVKKNSSPPLSLYGQLLW  
REFFYTAATNNPRFDKMEGNPICVQIPWDKNPEALAKWAEGRTGFPPWIDAIMTQLRQEGWIHHLARHAVACFL  
TRGDLWISWEEGMKVFEELLLDADWSVNAGSWMWLSCSSFFQQFFHCYCPVGFGRRTPNGDYIRRYLPVLRG  
FPAKYIYDPWNAPESIQKAAKCIIGVNYPKPMVNHAEEASRLNIERMKQIYQQLSRYRGLGLLATVPSNPNGNG  
NGGLMGYSPPGESISGCGSTGGHLLPASPGAQLGPGDGHSVVQSCALGDSHTGTSGIQQQGYCQASSILHYAHG  
DNQQSHLLQAGRTALGTGISAGKRPNPEEETQSVGPKVQRQSTN

>Agelaius\_phoe\_\_NWZ14047.1

DNWAFLYAQRLLALKQELPLHVCFLVPKFLEATIRHYRFMLRGLQEVAEECAELNISFHLLGYAKDVLPTFV  
TEHGVGGLVTDDFSPLRLPRQWVEDLRERLPEDVPFAQVDAHNIVPCWLASPKQEYSARTIRGKIHAQLPEFLT  
EFPFVVRHPPHPPSCPAEPIAWEACYSSLQVDHTVKEVEWATPGTAAGMAVLKSFIAERLKSFSSSHNDPNKAA  
LSNLSPLWHFGQVSTQRAILEVQKHRSYKDSVDAFVEEAVRRELAENFCYNNENYDSVQAYDWAQTTLKV  
HAKDKRPLYLSLQELEQGTTHDPLWNAQLQMVREGKMHGFLRMWAKKILEWTHSPEEALQFAIYLNDRYEL  
DGRDPNGYLTLSLCPAGCLWSICGIHDQGWAERPIFGKIRYMNYAGCKRKFDEQFERRYAPTH

>Agelaius\_phoe\_\_NWZ15919.1

KVDYDVCNYSYGNWLYSAGIGNDPRENKFNMIKQGLDYDGNQDYVRLWVPELQGIKGADIHTPWALSSAALSQ  
AGVTLGETYTPQPVVTAPEWSRHIRQRPGGSPHPRGKRGPAQHKGDRGIDFYFSRKKDA

>Agrilus\_pla\_XP\_018319593.2\_photolyase

MASITPRVGSKVDWTKFTKENFISAIKESRSKEGERVEDFKFNKNRIRILSDCKEVKESDGLIYWMCRDCRV  
QDNWAMLFQAURLARKNKIPLFVCYFTKNGSELVPTRRHNNFLINGLKEVAEECSRNLNIKFHILINGDPCKSLVD  
IVIRNNIGSVICELNPLRKPCKWQQTVMGMLPNDVSLVQVDAHNIVPVWITSSKQELAARTIRPKINRNLEEY  
LTGFPMVSKHEYAGELNLNMEYSFEDAISFESEKDVLDPEIKWAKPSGTTAGIEMHLFLTTRLKNYATTS  
GDPSKDNLSRMSSWVNFQQLSAQRIALEVENFKNSYKESVERYLEELIVRRELSDNFCYNNENYDNIEGADKW  
ARTTLDIHRKDKREYIYTKEQFAQAKTHDEIWNAAQVQVINEGRMHGYIRMYWCKKILEWTKSPEEAIEIGLH  
LNDTFALDGNNPNFGVGMWSICGVHDHGWTERPIFGKIRFMVFWSMRKKFDADAFCEQYGRRIDNATAPKAK  
KQSVSNIKQTYLNNKQSTKSHSES DNEEKVQEKSRPRRNKNETSRLQPKKKTKLK

>Agrilus\_pla\_XP\_018321938.1\_cry-2\_X1

MEPRQATVIHWFRLRLHDNPALLEAIQVAVSQQAFLRPLFILDNPNIKWMKIGPNRWRFLIQSLKNLNNSL  
KAVNSKLYVVRGKPEKVFRRILLEWSVTLITFESDIEPFAKERDTKIEKLAKELNIKVIQRISTIYNPDILIL  
TKNFGNPPLTYQKFISLIEQFKKPINLAKHPPNPVDYCKPFADLLEKNNSNCYEIPTLQELGVNEEGLGENLY  
SGGETEALARMEKYLENAQWICKFEKPNTSPNSLEPSTTVLSPLYLKGCLSSRLFYNRNLNDVIRGAYCTKPPV  
SLIGQLLWREFFYTVAAATPNFDKMVGNSICYQIDWDTNERHLQAWKTGKTGYPPFIDAIMRQLRTEGWIIHLA  
RHAVACFLTRGDLWISWEEGLKVFEELLDADWALNAGNWLWMSASAFFHQFYRVYSPTAFGKKTDKKGDYIR  
KYVPELRKFPEAYIYEPWLASKNVQKEAGCVVGVDPYPERIVIHETVYKINIGRMSAAYKRNNKVNNDNGKSAKS  
SNCSSNLKRKRK

>Agrilus\_pla\_XP\_018331212.1\_cry-1-like

MTGTIKHPSNQSPKKPVKHMVHWFRKGLRLHDNPALREGLRDATTFRCVFVLDPWFAAGSSNVGINKWRFLQC  
LEDLDSSLKKLNSRLFVIRGQPADALPKLFKEWGINALTFEEDPEPFGRVRDHNISALCKEMGITVIQKTSHT  
LYNLDAIISRNGGRAPFTYHQFQTVIAGMDPPPTAEAAVTDKTLNGAVTPVNEDHDDRFGVPTLDELGFDTEG  
LLPPVWQGGETEALARLERHLERKAWVASFGRPKMTPQSLASQTGLSPYLRFGCLSTRLFYYQLTDLYKKIK  
KAFPPLSLHGQLLWREFFYCAATKNPNFDMVGNPICVQIPWDKNPEALAKWANGQTGF PWIDAIMTQLREEG  
WIHHLARHAAACFLTRGDLWISWEEGMKVFEELLLDADWSVNAGMWWLSCSSFFQQFFHCYCPVKFGRKADP  
NGDYIRKYLPLVKNMPTQYIHEPWNASDAVQKAACKIIGKDYPLPIVNHTLASKINMERMKQVYQQLSKYRSF  
DTQKLNCISSSKLDYQPSVVTGVLKLNQI

>Agrilus\_pla\_XP\_025837056.1\_cry-1

MHFIQYCTDIYVLAPLTDILGKLFISQSNSTIKLEVFAMQVSILWFRHGLRLHDNPALHAALKKKQPFPLPI  
FIFDGETAGTQLIGYNRMRFCEALYDLDRQLKQLGGRLYYAKGAVVQIFTKIWQELGIGRLCFEEDCEPIWR  
ARDDSVKIMCKDLGIECEVCVSHTLWDPKKI IETNGGQPPPTYQMFLYTVDILGDP RPKPDEPRWSRVKFSNP  
FPLLEKVLYSFQTLNPNEDFGVFPEITETPLVRWIGGETQALKKLEERLKLEERA FRQGYLPSQNTPDLLGP  
PASQSAALRHGCLSVRKFYWSIQDLFKVIHGDRLPVHSITGQLIWREYFYTMSVKNPNYAVMKENPICLDIN  
WIQSTSTDYNIRLTSWKEGLTGYPFIDAIMRQLKAEGWIHHMARNMVACFLTRGDLWISWEEGLQHFLKYLID  
ADWSVCAGNMMWVSSSAFEQLLDCSTCICPINFGKHFDPSGEFIKRYVPELKKFPSTLIYEPWKASLEQQIAA  
ECIVGKDYPNRIINHKEAAERNRLAMKTLREDLTKPPTHCCPSNENEVRQFMWLQDTCCLKHQYVSI

>Agrobacterium\_fab\_WP\_174020122.1\_DNA\_photol

MSLKTAPVIVWFRKDLRLSDNLALLAAVEHGGPVIPVYIREKSAGPLGGAQEWLHHS LAALSSSLEKAGGRL  
VLTSQDAERILRDLISETGADTVLWNRRYDPTGMATDKALKQKL RDDGLTVRSFSGQLLHEPSRLQTKSGGPY  
RVYTPFWRALEGGEAPHAPVDAPKSLTGPKTSPQSEKLADWKLLPTKPDWAKDFSDIWSPGENGALEKLDDFI  
DGALKGYEEGRDFPAKPATSLLSPHLAAGEISPAAVWHATKGLSRHIASNDISRFRKEIVWREFCYHLLFHFP  
ELDEKNWNSDFDAFPWRDDDTSFNAWTRGMTGYPIVDAGMRQLWKHGTMHNRVRMIVASF LKHLIDWRKGE  
KWFRNTLVDADPASNAANWQWVAGSGADASPF FRI FNPI LQGEKFDGDGDYVRRFVPELEKLERKYIHKPFEA  
PKDALKKAGIELGKTYPLPIVDHGKARERALAAYAAVKKTT

>Albugo\_can\_CCI11597.1\_unnamed\_pr

MTTIRCRLESCPKTERIQLNRIRWLYDGAISAKKTD TSAQDKYI LYWMQTSVRTTYNYGLE YALEAATALAL  
PLQVIYFLSDRSAPVKQLARDPNAFAFSTERHAKFALEGLASTKSRLKERGIDLKIVLSGNTKQESENEENE  
DEFGATRYHLLDRCA NAVLVVTD RAYIRFSANDTLRCAEYAKESKNAWGLVQVEGDVVPSA IASDKEEYSA  
RTIRPKVTRHLAKFLVQLKEQDISDKIKSLDNLHLFLPFKLLNKNTSTKDCILEIDPARKAEMLEALD LRS  
VVPVESMLGGEDEAERHAREFARGKLCKYAEARNEPGADGSSNLSCYLHYGHISPVWIALLVKEIDDANNKNS  
QDAFLEEMIVREL SVNFVVYNPD RYDSIEGIPDFAKKT LNDHRGDERPHIYTLKDLESGLTEDKYWNAQLE  
VVHSGRMHGYMRMYWGKKILEWSKTPEEAFERTVYLN NKYS LDAPHN SYTGVAWTFGKH DQGWRE REIFGKV  
RYMNETGLKRKFDMDG YVQKIKSLRESCGDE

>Albugo\_can\_CCI43115.1\_unnamed\_pr

MESHQDLLDFGAFPADFYENDESASGIDAFEIQNCFDVFEDSSLESKITDKHATMPSIRAIMWFRDLRLHDN  
LALHRALKFVEAHKDTESVQLIPLYIIHRPKRLLCGVNRFQFLLESVGLAEAIASRGSR LIIARGE GIEVFR  
RILPAWKITHMFFDQTI EFPATARDERVRELAASLDIHVETTRGYTLYDL DQVMEKNGGKAPATYTSFLRTVA  
TFPEPAKPLPIPSSIPGWEDSREGLYKRLVEEYLNVSHEQAISTQSQSWIDVIAGPQKLFRVPELSEFGFER  
PERHSFIYGGENVALKILQEYCKNEGQVVKFEKPKTSPAETCPSKSTTSLSPYLYFGCISTR TFFHRVRDIQN  
RHAKASSAPPVSLDGQLLWREFFHCNGHANPHFDKMEGNPCLHIDWRWHTLPKTI EEESEALSEDEKLAKAQF  
EAWKEGQTGYPWIDAIMIQLKEEGWMHHLARHSVACFLTRGDLYISWVRGLEVFQERLIDHDWSINCGNWLWL  
SASAFFTAYFRVYSPSTFGKKWDVEGKYIRKYI PALAKMPAKYIYEPWKAPVTVQRLANCLVGKDYPPFIVDH  
KIAMRRCMAGMKASYAARKYGEQSHETNASPHPKKRSREYDEVKDEK

>Albula\_glos\_KAG9335192.1

MLYKLSPLSVLLSPRFLQLCLELDASLRKCNSRLFVIRGQPTDVFPRLFKEWNITRLSYEYDSEPFGERDA  
AIRKLASEADVEVMVRISHTLYDLDKI IELNGGQSPLTYKRFQTVISRMP PVEMPAEVITA EIVIGQCTTPIAD  
DHDEKFGVPSLEELGFDTEGLSTAVWPGGETEALTRLERHLERKAWVANFERPRMNANSLLASPTGLSPYLR  
GCLSCRLFYFKLTDLYKKVKRHSSPPLSLYGQLLWREFFYTAATNNPRFDKMEGNPICVQIPWDRNPEALAKW  
AEGCTGF PWIDAIMTQLRQEGWIHHLARHAVACFLTRGDLWISWEEGMKVFEELLLDADWSVNAGSWMWLSCS  
SFFQQFFHCYCPVGFGRRTDPNGDYIRGFPAKYIYDPWNAPESVQKVA KCVIGVHYPKPMVHHA EASRLNIE  
MRQIYQQLSCYRGLGLLATVPSNPNNGSSEGMPAAMGPCSGEGSQDAGYQMCVTPQRDWSTGMITY PQGDSQSG  
SGTQQPGFPGGSNVVCYRQDSQQTHGAFLQPGHHTSASNTVKRHS EDSPLSVSSKVQRQSSN

>Albula\_glos\_KAG9336928.1

MLGSSVNRTDNITRQSFYLTMSGDEAKLVSQIRREMRELVLGRQDP EEEFCRSVSM LGHQGAQEQLLDLIEP  
LVFEHAEVHARLVTMFLDYFATQAHSPVKKTEEELELALALSLQEMRGSEFVAPQPPSHAQPHYGSYAQQAA  
SGVRVSQRKVL SHGNKASVICD TDLAGDGRASRESTKQRADTQSGSLCEAGPGSCSEEGVKVDLSSNISDNPK  
SSRRRRQRKKNLAMTQSPSSPRPALLWFRDLRLIDNPALIGSLEVGGPVI PVFLWSPDEEEGPGVTVAMGG  
ASKYWLHHSLLCLNQSL EKLGLSHLVTVKVERS SLESLSQSLAAETGAGTVLATALYEPWLKQRDEL VFS SLE  
GIKCQLYHSYSLRHPSISTEGVGLRGIGSVSHFMSCCQRSPDSGLVPTAWPQGCALSQGLGLARMPRRKDGT

VDWAANIRSSWDFSEDGAQARLDAFFQDGIYRYEKESCRADAPNTSSLSPYLHYGQISPRWLLWQPPKFQORKL  
AWRDLAYWQLSLFPDLPWESLRPPSEHTHLKAWQRGRTGYPLVDASMRQLWL TGWMNNYMRHVVASFLIAYLH  
LPWQEGYRWFQDTLVDADVAIDAMMWQNGGMCGLDHNFMVHPVSAALTCDCGAFVRRWCP ELADLPDEL I H  
KPWQCPTSLRRAGVVLGGNYPERIVTDLEERRAQLQDVA AVRKRFG EYVDRRSGCDLVPLPDR LVKEALGI  
GMGDLVHSGGRFLLPVITRLEFKHQTHDPDSAGANPYSAVLRGYVSRKRDETVAF LNERDFTASVMNES AQ R  
RDRQERDQRALEGLPRPPAPRGRGRRTPSKDTFSTVPGGVLVPHG

>Albula\_glos\_\_KAG9347773.1

MSARRTIICLLRNDLRLHDNEVFHWAQRNAELIVPLYCFDPRHYLGTTTCYNFPRGTGPFRLSFLLD SVKDLRAT  
LQRNGSNLVVRRGKPEEVVGD L I KQLG SVS AVAFHKEVTQDDLDVEKGVEDVCSQLK VNVQTFWGSTLYHIED  
LPFNHISRLPDVYTQFRKAVETQGRV RPVLPTPDVLKPLPTGLEEGPIPTHE DLEQMEMMADPRS AFPCSGGE  
SQALARLQHYFWDTD AVASYKETRNSLIGVNYSTKFAPWLSMGCISPRYIYEQIKKYESERTANQSTYWVIFE  
LLWRDYFRFVAVKYGNRIFALEGLQDKSVPWKTD MQLFNAWKEGRTGVPFVDANMRELAQTGFMSNRGRQNV A  
SFLTKDLGLDWRMGA EW FQYLLVDHDVCSNYGNWLYSAGIGNDPREN RKFNMIKQGLDYDNNGDYVRQWVPEL  
QG I KGGDVHTPWTLSSGALAHAKVSLGETYPSPIVMAPEWSRYVKKKPSGAGPTSRGRKGPSHTPRQHKDRGI  
DFYFSRSKDFYIEIKNYEKRDAPFEKILDDWESQCPDATVGKLLSMLEEAGRH DVVTDHIDLIEEDVRKYLEK  
MKEPVQVPDIDSWTPEKNGITIKDDPSGNVPETFDAFICYCQSDIEFVHEMIRQLEQTDHRLKLCVFD RDVLP  
GTCVWTITSELIEKRCKRMVVVISDDYLESEACDFQTKFALSLSPGAQKKRLIPVIYKTMKKPFPSILRFLT V  
CDYTRPCTQSWFWRLAKALSLP

>Albula\_glos\_\_KAG9351737.1

MSHISIHWF RKGLRLHDNPALMAALQGCVEIYPLFVLDPSEKLAGINSCRFLLGSLKDLDCSLQKLN SRLFQK  
WKVTRLT FESDTEPDSVDRDRRVEKLAK EHDVEVIQKVSHTLYDTERVIEKNNGKPPLTFNRLQTVLQAMGPP  
EKPVPSPSLEDMKS VQT TGWKKHEEEYGVPTFEELGKDPQSVGSELYPGGEQEALRRLDEHMKRTGWVCNFQK  
PETSPNALNPSTTVLSPYIRYGCL SARTFWWRLTDVYRGKKHSQPPVSLHGQLLWREFFYTASVGIPNFNRMK  
GNSVCVQVDWDSKPELLAAWREARTGFPFIDA IMTQLRQEGWIHHLARHAVACFLT RGD L WISWEEGQQVFEE  
LLLDGDWALNAGNWQWLSASAFFHQYFRVYSPIAFGKKT DKHGEYIKKYLPI LKKFPTEYIYEPWKAPRSIQE  
RAGCIVGKDYPCPIVNHEVISKENIKRMKLAYS KRSPDPSESKGKVKGEKRKA VSVIDMLTKKKKAGPY

>Albula\_glos\_\_KAG9352121.1

MVVNSVHWF RKGLRLHDNP SLQEALNGADTVRCVYILDPWFAGSANVGVNKWRFLLESLEDLDASLRKLD SRL  
FVVRGQPAEVFPRLFK EWNVTRLTFEYDSEPYGKERDAAI IKMALEFGVETRVKNSHTLYNLDR I IELNNSP  
PLTFKRQFQAI VNR LGLPKRPLATVTKQQLDSCRTEISDNHNDRYGVPSLEELGFKTHGLSPSVWKGGETEALD  
RLDKHLDRKAWVANFERLRINICSLMASPTGLSPYLRFGCLSCRLFYYNLRELYMKVRKHPSPLSLFGQLLW  
REFFYTAA TNNPNFDRMEGNPICVQIPWDHNPEALAKWAEGR TGFPWIDA IMTQLRQEGWIHHLARHAVACFL  
TRGD L WLSWESGMRVGPPPSEFLH LTF L GHR LILEPSLG CNPH

>Albula\_glos\_\_KAG9353080.1

MTHRTIHLFRKGLRLHDNP SLVGAL ESSEVVYPVYVLDRAFLEGS MATGALRWRFL LQSLQDLQSSLAARGSL  
LYVLQGSHEAVLRQLIQQWSITQLTFDTEVEFPFYTQLDDHLCALCKELGVVVHSCVAHTLYDVKRI IKANGGE  
PPLTYKKFLHVL SILGEPDTPARDITLQDFQKCKTPVEDGREEQYQVPSLEDLGIEVDVEVLWPGGES HGLKR  
LEKHIESQGWVNF SKPRTIPNSLLPSTTGLSPYFSLGCLSVRSFFYRLSNIYAQSKNHS LPPVSLQGQVLWR  
EFFYTVA SATPNFTKMAGNPICLQIHWYENQAALDKWR TAQTGF PWIDA IMTQLRQEGWIHHLARHAVACFLT  
RGDLWISWEEGMKVFEKYL LDADYSVNAGNMMWLSASAFFHQYTRIFCPVRFGRRTPD GQYLRKYL PVLKNF  
PSKYIYEPWTA PLEVQLEAGCVIGKDYPLPMVNHLEVSQRNTALMRQVRSE QENTAQLTRDVADDPMEIGMKR  
ECRDQRPSDDFSEKTERANKRFSPEGEHKSLS CNWASDTIRLP ELSGEVM

>Alectura\_lath\_\_NXL85029.1

AQLSVLFSSFVLKV D YDVCSNYGNWLYSAGIGNDP RDN RKFNVIKQGLDYDGN G DYVRLWVPELQGVKGADIH  
TPWALNSATLSQAGVT LGETYPQPAVTAPEWSRHISQRPQGRSPHPRGRRRPAYTAMQHKDRGIDFYFSRKKD  
A

>Alectura\_lath\_\_NXL85365.1

MPHRTIHLFRKGLRLHDNPALLAALRSSHVLYPVYILDRTFMTSSMHIGALRWRFL LQSLQDLQENLRRLGSC  
LLVIQGEYESV VREHVQKWSITQVSLDAEMEFPYKEMEANIRALGEELGF EVLSLAGHSLYNTERILD L NGGT  
PPLTYKRFLHILSL LGDPEVPVRNLTAEDFQRCRSPEPGLAERYRVPLPAELKIPAESSSPWRGGETEGLQRL  
ERHLADQGWVASFTK PRTIPNSLLPSTTGLSPYFSTGCLSVRSFFYRLSNIYAQAKHHS LPPVSLQGQLLWRE  
FFYTVA SATPNFTQMAGNPICLQISWYEDAERLHRWKT AQTGF PWIDA IMTQLRQEGWIHHLARHAAACFLT R  
GDLWISWEEGMKVFEELLLDADYSINAGNMMWLSASAFFHQYTRIFCPVRFGRRTPDEGHYVRKYLPI LKNFP  
SKYIYEPWTA SEEEQKQAGCII GQDYPFPMVDHKQASDRNLQ LMKQVREEQHGT AQLTRDDADDPMEMKLKRD  
RAGEDGTKAKAARMAE

>Alectura\_lath\_\_NXL86003.1

RFL LQCLEDL DANLRKLN SRLFVIRGQPADVF PRLFK EWNIAKLSIEYDSEPF GKERDAAIKKLASEAGVEVI  
VRISHTLYDLDKI IELNGGQPPLTYKRQTLISRMEPLEMPVETITPEVMEKCTTPVSDDHDEKYGVPSLEEL  
GFDTDGLPSAVWPGGETEALTRLERHLERKAWVANFERPRMNANSLLASPTGLSPYLRFGCLSCRLFYFKLTD  
LYKKVKKNSSPPLSLYGQLLWREFFYTAA TNNPRFDKMEGNPICVQIPWDKNPEALAKWAEGR TGFPWIDA IM

TQLRQEGWIHHLARHAVACFLTRGDLWISWEEGMKVFEELLLDADWSVNAGSWMWLSCSSFFQQFFHCYCPVG  
FGRRTDPNGDIIRRYLPVLRGFPKAYIYDPWNAPESVQKAAKCVIGVNYPKPMVNHAEASRLNIERMKQIYQQ  
LSRYRGLGLLATVPSNPNGNGGGLMGFSPGESISGCASTGGVPLGTGDGQTAGVQTCALGDSHTGASGIQQQ  
GYCQASSILRYAHGDNQQSHLLQAGRTSLGTGISAGKRPNPEEETQSVGPKVQRQSTN

>Alectura\_lath\_\_NXL89338.1

CIYILDPWFAASSAVGINRWRFLLQSLEDLDNSLRKLNARLFVVRGQPTDVFPRLFKEWGVTRLTFFEYDSEPF  
GKERDAAI IKLAKEAGVEVVIENSHTLYDLDRIIELNGNKPPLTYKRFAQAIISRMELPKKPVSSIVSQMETS  
KVDIQENHDDVYGVPSLEELGFPTDGLSPAVWQGGETEALARLDKHLERKAWVANYERPRMNANSLLASPTGL  
SPYLRFGCLSCRLFYRYRLWELYKKVKRNSTPPLSLYGQLLWREFFYTAATNNPKFDRMEGNPICIQIPWDKNP  
EALAKWAEGKTGFPPWIDAIMTQLRQEGWIHHLARHAVACFLTRGDLWISWESGVRVDFEELLLDADFSVNAGSW  
MWLSCSAFFQQFFHCYCPVGFGRRTPSGDYVKRYLPKLKGFPSRYIYEPWNAPESVQKAAKCIIGVDYPKPM  
VNHAEASRLNIERMKQIYQQLSRYRGLCLLASVPSCVEDLSGPVADSASGQGSSTSTAIRLPQSDQASPKRKH  
EGAEELCAEELYKRAKVTGLPAPEIPGKS

>Alectura\_lath\_\_NXL96297.1

QECTELDIPFHMLLGYPKDVLPTFVVQNSVGGLVTDFCPLRISRQWVEDVRDRLPEDVPFAQVDAHNIVPCWV  
TSPKQEYSASTIRGKIHRQLPEFLTEFPPIQHPHPSPCAEPMWMDACYSSLQVDRTPVEVAVWTPGTAAGL  
AMLQSFIARKLSKFSSQRNNPNKAALSNLSPWFHFGQVSTQRAILEVQKHRRAYKESVDAFVEEAVVRRELAE  
NFCYYNENYDSVQGAYGWAQTTLKLHAKDKRPFLYELPQLEQAKTHDPLWNAQLQMVQEGKMHGFLRMYWAK  
KILEWTCCEALRLAIYLNDRYELDGRDPNGYVGKRLWSICGIHDHGWKERNVFGKIRYMNYAGCKRKFV  
EQFERRY

>Alkalihalobacillus\_sha\_WP\_059102964.1\_DNA\_photol

MSIHIVWFRDLRWNDHTALAAALDACEGDDRVMLVFHINPKMTKSFSQRHDYFYESLKAFVDAGKDKGVSVH  
FLHGEPEEAFRELLEQVKDIRKVHFNKDESGAGRQDQAVQKLEAKGVSVHLYTDHHLHGAEVTKEDGSMY  
QVFTPYRYKWRSLPKPELRIIDEQKLQSTSIDQRDTFAKGREAYNQLMQQKTGKWSDRAGEVNGRERLKTFLN  
DGLATYHEERDVPAIDGTSRLSPYLRTGALSPRMVHKALQIVEDKYGGSKGADTFIQELAWRDFYNMIYYAHP  
NGKDEEWNQTYRNLDSYDEEELERWKRGETGFPIVDAAMRQLQQEGWMHNRMLRMVVASFLTCKDLLLDWRLGE  
RHFEEMLIDYDPASNIGGWQWAASTGTGAVPYFRVFNPTRQSERFDPDGTFIKMYLPELKEPLDYIHEPHRM  
SSEQQEKAECIIIGKQYPEPMVNHKERRRQAIEMFEGET

>Allacma\_fusc\_\_CAG7721498.1

MASSPKTKTSDNNILEFSDKIHEQRLQLAKSPAEFKFEKSRCRMILTKEENLPANHRGILYWMSRDQRVQDNW  
AMIYAQRLAIAEKVPLIVCFCLVPKFLEATLRQYGFMLRGLSLVREELCKLKIPFHLFFGDAKKTIPFVTKH  
NIGGVVTDFAPLRVPRLLWVKQVGDKLPEDVPFCQVDAHNIVPLWVTSSKQEAARTIRPKINNNLPKYLTEFP  
PVTQHPFKDASKMCQNPFENWDKLNFLINKSVKEVEWAKPGYEEESLKVLSKFIDRLKNFEHKRNDPNVNA  
LSNLSPWFHFGQISVARAVLEVKKSSHKSAAAVFIEEAVVRRELSDNFCYYNDNYDSLGDALDWARSTSLNLHK  
KDKRPRLYKLKEFEGANTYDDLWNAQIQNLLEGKMHGFLRMYWAKKILEWSESPEKALEIAIYLNKYNDIG  
RDPNGYVGCWWSICGIHDQGWREREVFGKIRYMNYEGCKRKFVDVGDFVFKYKRLAKTTADAKKEDKGSPPSTK  
KETEEGSTSKSKSVAGSSSNSRKGR

>Allacma\_fusc\_\_CAG7824192.1

MRKINPQGRAQMSQKQATVIHWFRKGLRLHDNPALIAAVEKLDTLPSAHLRPIFILDTKLVETRYVGANRWRF  
LVDSLADLDKSLRSLGTRLYVLRGDPVSQFKFALKNNVVKLITYETDTEPYARKRDVEVFKLAEAEAGVEVKYF  
FSHTLYEPIVLLRQNKSEAPKTYQKFLDVVSKAGEPPASKVAVTEVYKQSPPKDPDKDYQLPTLRELHVDES  
KLGPLHYPGGETEALRRLTQVMTRKTYISNFEKPNTSPNSIEPSTTVLSPDPNLLICKQIDWDVNPEYLSAWA  
EGRTGYFPIDAIMTQLRKEGWIIHHLARHAVACFLTRGDLWISWEEGQLVFEELLLDADVLYNAGNMMWLSASA  
FFHQYRVYSPIVFGKKTDPHGEYIRKYLPLKAKYPPNYIYEPWTAPMSVQKAAGCIIIGTDYKPIVDHAKIH  
KVNLRQMNAAYKKVPSPPKKNTPKFTRASREDDDDSSVPFAKKFRSEFC

>Allacma\_fusc\_\_CAG7829298.1

MVSAPLVVPPTASHDSKRADAPGRTSRDAVQEWPIFHLTDSETYNNVVMNGKHTVHWFRGLRLHDNP SLIA  
GLQGAVTFRFCVFIIDPWFAGSSNAGVNKWRFLQLCLDDLC SLRKLNNRSLFVIRGQPADVL PKYFKEWGITC  
LTFEEDPEPFGRVRDQNI IAQCEELGIEVIVHPSHTLYKLDLII EKNGGKPLTYRQFQNVIASMGPPPELPCP  
PVEEVAFSVTPIEPDHDDKFGVLTLEELGFDTDCLNPAVWRGGESEAIARLERHLERKAWVASFGRPKMTPRS  
LLASQTGVSPYLRFGCLSPKLFYHQLTALYRKIKKGEPPLSLHGQVLWREFFYTAATKNPNFDRMVGN TICVQ  
IPWDNNPIGLAKWASGETGFPPWIDAIMTLREEGWIIHHLARHAVACFLTRGDLWISWEEGMKVFEDELQLDADW  
SVNAGMWMWLSCSSFFQQFFHCYCPVRFGRKADPNGEFIRKYLPLVRNFPNNFIHEPWPMAPESVQMSAKCIIIG  
EDYPKPMINHAVASRINMERMRQVYMQLSKYQSEDVRTMVALAALMSLRTLNFVKVLLARI

>Allacma\_fusc\_\_CAG7836899.1

MAVTGRRFETGLEFIPSSSMCVVLESLRRISNQAIGKTVFEGISRNTYSCNLNKMISGSSQT VQQPKYRNCV  
CWLRLNDRYHDNEVILWAHENSERVMPLYCFDPRHFGKTYKYGF PKTGPFRAKFLLESVQDMHETLTKTHGSKL  
SVFVGKPEEVIASLLENLEVDVIVYQKEVTKEETDVEAAVQNVAKRNKIKFNTIWGSTLYHEDDLRFSVKFIP  
DTYTEFRKSVEAQSKIRILKPMMPDLKPLPTGEIKCSGVPSLVELGVKDFPLHESSAFPFKGGETAALQRLNS  
YFWESQAIEKYKETRNLIGSEYSTKFCWLAFGCISPRYIYHQIKSYERERTKNDSTYWWIFELIWRDYFRF

VCAKYGNLVFYPPGGIMQKKITWKYDLNTFQKWADGQTVPFVDANMRELLKTGWMSNRGRQNVASFLTKDLQL  
DWRLGAWEFYEYLLIDYDVCSNYGNWNY SAGIGNDPRENRFKNMIKQGTDYDSEGN YIRTWVPELQPILGSKI H  
IPWTLHPSDLHGVLGVHYFPFPI LVASEWTRHFDKTKNPRWPDHRQKNQKGIDFYFKNN SKR

>Alligator\_miss\_\_XP\_006264229.2

MFPKKQRQAAGADTEPSGSRKRGRQDAEVVPGAESLAEAVKQARRRAALSVREFKF NKKRVRLLSQESH LQDG  
ALGILYWMSRDQRVQDNWAFLYAQRLALKQQLPLHVCFCFCLVPKFLDATIRHFGFLLKGLQEVAEECGELGIPF  
HLLQGYAKDVLPAFVTRHGIGGVVTD FSPLRVPLQWVEDVKERLPQGVPLVQVDAHNI VPCWVASNKQEYGAR  
TIRPKIHAQLPEFLTEFPPI IQHPFPAAAPAQPIDWDACYAGLEVDRTPVEVKWATPGTAAGLAVLQAFVTRR  
LPGYSEYRNNPNKAALSNLSPWFHFGQVSVQRAVLEVQKSRDRHRESVNSFVEEAVIRRELADNFCFYNKSYD  
QLEGAHDWARDTLILHARDKREYLYDLHQLEQGKTHDQLWNAAQIQMVREGKMHGFLRM YWAKKILEWTR SPE  
DALRFAIYLNDRFELDGRDPNGYVGCMWSICGTHDQGWAEARNVFGKIRYMNYAGCKRKFNVGQFEHKYRP

>Alligator\_miss\_\_XP\_006274133.1

MAASRSFPSSVPARAGPCRAVHWFRRLMRHDPALQAALRDAASVRCIYIILDPWFAASSAVGINRWRFL LQS  
LEDLDNSLRKLNLSRLFVVRGQPTDVFPRLFKEWGVTRLTFEYDSEFPFGKERDAAI IKLAKEAGVEVVENS HT  
LYDLDR IIELNGNKPLTYKR FQAI ISRMELPKKPVS SITSQQMEKCKAEIQENHDDVYGVPSLEELGFPM DG  
LAAAVWQGGEMEALARLDKHLERKAWVANYERPRMNANSL LASPTGLSPYLRFGCLSCRLFYRLWEL YKKVK  
RNSTPPLSLYGQLLWREFFYTAATNNPKFDRMEGNPICIQIPWDRNPEALAKWAE GKTGF PWIDAIMTQLRQE  
GWIHHLARHAVACFLTRGDLWISWECGVRVFEDELLLDADFSVNAGSMMWLS CSAFFQ QFFHCYCPVGFGRR TD  
PSGDYVRRYLPKLKGFP SRYIYEPWNAPE SVQKAAKCIIGVDY PKPMVNHAETSRLNIERM KQIYQQLSRYRG  
LCLLASVPSCAEDLSGPVTD PASVQGCSTSTALKPSQSGQASPKRKHEGIEEMCTEDLYKRAKVTGLHGPEIP  
SKSL

>Alligator\_miss\_\_XP\_006275665.1

MKHSCIHWFRKGLRLHDNPALLAAMKDCSELYPIFILD PWFPMQVSVNRWRFLVESLKD LDES LKKLNSRL  
FVVRGH PAEVFPGLFKAWKVTRLT FEVDTEPYSKQ RDAEVVRLAAAHGVQVIQKVSHTLYDTRVIAEN NGKV  
PLTYRQLQAVLAGLGPPKQPV LAPTLET LKDCCTPGRDNRDPKYEIPTLEELGQDPKEAGPCLYPGGESEALS  
RLAFHMKRMTWVCNFKKPDTEPNTLSPSTTVLSPYVKFGCLSVRTFWWKLAEIYRGKKHSSPPVSLHGQLLWR  
EFFYTAGAGIPNFNRMEGNPICVQVDWDDNPEYVKAWKEGRTGYPFIDAIMTQLRTEGW IHHLARHAVACFLT  
RGDLWVSWEEGQKVFEELLLDADWSLNAGNWQWLSASAFFHQFFRVYSPVAFGKKT DKSGAYIKKYLPI LRKF  
PAEYIYEPWKAPRSMQEQAGCIIGRDY PKPIVEHEALSKRNIMRMKAAYAQRSHSKAAQVEKESTKKGGKRKL  
PAGPSVELLTKPKAKSS

>Alligator\_miss\_\_XP\_019345130.1

MGVNAVHWFRKGLRLHDNPALRECIQGADTVRCVYIILDPWFAGSSNVGINRWRFL LQCLEDLDANLRKLN SRL  
FVIRGQPADVFPRLFKEWNITKLSIEYDSEFPFGKERDAAI KKLASEAGVEVIVRISHTLYDLDKI IELNGGQP  
PLTYKR FQTLISRMEPLEMPVETITAEVMEKCTTPVSDDHDEKYGVPSLEELGFD TDGLPSAVWPGGETEALT  
RLERHLERKAWVANFERPRMNANSL LASPTGLSPYLRFGCLSCRLFYFKLTDLYKKVKKNSSPPLSLY GQLLW  
REFFYTAATSNPRFDKMEGNPICVQIPWDKNPEALAKWAEGR TGFPWIDAIMTQLRQEGWIHHLARHAVACFL  
TRGDLWISWEEGMKVFEELLLDADWSVNAGSMMWLS CSSFFQ QFFHCYCPVGFGRR TD PNGDYIRRYLPVLRG  
FPAKYIYDPWNAPEGVQKAAKCMIGINYPKPMVNHA EASRLNIERM KQIYQQLSRYRGLGLLATVPSNPNGN G  
NGGLMGYS PGENVSGCSRAGAQMGS SDGHTVSVQPCALGESHGGSNGIQQQGYFQASSILHFPHGDDQQSHLL  
QQGR TSLSSGISAGKRPNPEEETQSIGPKVQRQSTN

>Alligator\_sinensis\_XP\_025063697.1\_cryptochro

MTLKETKLLATCCLLISQEI AFRNRTGFL LQSLLEDLDNSLRKLN SRLFVVRGQPTDVFPRLFKEWGVTRLT FE  
YDSEFPFGKERDAAI IKLAKEAGVEVVENS HTLYDLDR IIELNGNKPLTYKR FQAI ISRMELPKKPVS SITS  
QQMEKCKAEIQENHDDVYGVPSLEELGFPTDGLAAAVWQGGEMEALARLDKHLERKAWVANYERPRMNANSL L  
ASPTGLSPYLRFGCLSCRLFYRLWEL YKKVKRNSTPPLSLYGQLLWREFFYTAATNNPKFDRMEGNPICIQI  
PWDRNPEALAKWAE GKTGF PWIDAIMTQLRQEGWIHHLARHAVACFLTRGDLWISWECGVRVFEDELLLDADFS  
VNAGSMMWLS CSAFFQ QFFHCYCPVGFGRR TDPSGDYVRRYLPKLKGFP SRYIYEPWNAPE SVQKAAKCIIGV  
DYPKPMVNHAETSRLNIERM KQIYQQLSRYRGLCLLASVPSCADDLSGPVTD PASVQGCSTSTALKPSQSGQA  
SPKRKHEGIEEMCTEDLYKRAKVTGLHGPEIPSKSL

>Alligator\_sin\_XP\_006021416.1\_cry-1-like

MKHSCIHWFRKGLRLHDNPALLAAMKDCSELYPIFILD PWFPMQVSVNRWRFLVESLKD LDES LKKLKSRL  
FVVRGH PAEVFPGLFKAWKVTRLT FEVDTEPYSKQ RDAEVVRLAAAHGVQVIQKVSHTLYDTRVIAEN NGKV  
PLTYRQLQAVLAGLGPPKQPV LAPTLET MKDCCTPGRDNRDPKYEIPTLEELGQDPKEAGPCLYPGGESEALS  
RLDFHMKRMTWVCNFKKPDTEPNTLSPSTTVLSPYVKFGCLSVRTFWWKLTEIYRGKKHSSPPVSLHGQLLWR  
EFFYTAGAGIPNFNRMEGNPICVQVDWDDNPEYVKAWKEGRTGYPFIDAIMTQLRTEGW IHHLARHAVACFLT  
RGDLWVSWEEGQKVFEELLLDADWSLNAGNWQWLSASAFFHQFFRVYSPVAFGKKT DKSGAYIKKYLPI LRKF  
PAEYIYEPWKAPRSMQEQAGCIIGRDYPRPIVEHEALSKRNIMRMKAAYAQRSHSKAAQVEKESTKKGGKRKL  
PAGPSVELLTKPKAKSS

>Alligator\_sin\_XP\_006024339.1\_cry-1

MGVNAVHWFRKGLRLHDNPALRECIQGADTVRCVYILDPWFAGSSNVGINRWRFLQCLELDANLRKLNSRL  
FVIRGQPADVFPRLFKAWNITKLSIEYDSEPFPGKERDAAIKKLASEAGVEVIVRISHTLYDLDKI IELNGGQP  
PLTYKRFQTLISRMEPLEMPVETITAEVMEKCTTPVSDDHDEKYGVPSLEELGFDTDGLPSAVWPGGETEALT  
RLERHLERKAWVANFERPRMNANSLASPTGLSPYLRFGCLSCRLFYFKLTDLYKKVKNSSPPLSLYGQLLW  
REFFYTAATSNPRFDKMEGNPICVQIPWDKNPEALAKWAEGRTGFPWIDAIMTQLRQEGWIHHLARHAVACFL  
TRGDLWISWEEGMKVFEELLLDADWSVNAGSWMWLSCSSFFQQFFHCYCPVGFGRRTDPNGDYIRRYLPVLRG  
FPAKYIYDPWNAPEGVQKAAKCMIGINYPKPMVNHAESRLNIERMKQIYQQLSRYRGLGLLATVPSNPNGNG  
NGGLMGYSPGENVSGCSSAGAQMSSDGH TVSVQPCALGESHGGSNGIQQQGYFQASSILHFPHGDDQQSHLL  
QQGRTSLSSGISAGKRPNPEEETQSIGPKVQRQSTN

>Alligator\_sin\_XP\_025058533.1\_photolyase

MFFPKQRQAAGADTEPSGSRKRGRQDAEVAPGVESLSEAVKQARRRAALSVREFKFNKKRVRLLSQESHLDG  
ALGILYWMSRDQRVQDNWAFLYAQRLALKQQLPLHVCFCCLVPKFLDATIRHFGFLLKGLQEVAEECEGELGIPF  
HLLQGYAKDVLPAFVTRHGIGGVVTD FSPLRVPLQWVEDVKERLPQGVPLVQVDAHNI VPCWVASNKQ EYGAR  
TIRPKIHAQLPEFLTEFPPIIQHPFPAAAPAQPIDWDACYAGLEVDRTPVEVKWATPGTAAGLAVLQAFVARR  
LPGYSEYRNNPNKAALSNLSPWFHFGQVSVQRAVLEVQKSRDRHRESVNSFVEEAVIRRELADNFCFYNKSYD  
QLEGAHDWARDTLILHARDKREYLYDLQOLEEGKTHDQLWNAAQIQMVREGKMHGFLRMYWAKKILEWTR SPE  
DALRFAIYLNDRFELDGRDPNGYGFPIPEIKLAPLYFGPGPYWPARQAQAHSRTDLPSP TQLPHSTIPLAPA  
AREGAGTRGGAGQPDGDP SLCWAERNVFGKIRYMN YAGCKRKFN VQGFEHKYRP

>Allomyces\_mac\_KNE59778.1\_AMAG\_05242

MPPATTNLARNVLMWFRRDLRLHDNPALLSALGQPDRI PAAQHLYPVYCLEIPTKKKCGHRRWIFLLECLHDL  
DANLRKLGSRLFVVRGLAPDVLPLLVQHWNVSELAVGECHEPFAVARDNDVAQQIAPHGCD FKSFPGR TLF RP  
QDVLARTGNGKAPLTMAAFSKIAERLPVPTPVDAPASLPSLGDDAITALRNALDPATFDALAGPQGDFS VPTI  
EPDGTVP EHLHTTPIPAHEQSPHRGGETEALRRLDAYLS DHARVTQFEKPKTSPAAFY PNADTTILSPYTTYG  
ALSVRTFRAGIDRVYRAAKGKHSKPPVSLLAQLYWREFFMTAGATT LNFEQMRNPICLQTEWKCI PGETTRE  
SHPDDYAMLDAWAEQGTGYPWIDAIMVQLRREGVWHHLARHSVACFLTRGDLYISW ERGAEVFEDLLLDHEWA  
LNRGNWMWLSASAFFH QYFRVYSPVKWGQSWDSEGVFIRKYL PVL RKM PKQYIYEPWKAPIAVQRAAGCVVGV  
DYPKRIVDHVVVKVNM T KMKTS HAAQREQAAMENGDSNGGRNGTRERSGNMRDRPL

>Allomyces\_macro\_KNE55283.1

MAPAASRRPRSSSATNSDAYSSNSSDNSTMAPPPAKKPRATATAAASTSSSSTRPASPRQQGPVVFWR SKDL  
RVRDNTALYRAWVQAAQVERAARCSRRKG VACVGAHDECIVAPGVVKS KDNKVYTVYTPFRKAWQDLV KRKHP  
QDWLAMPDPGANPASVRTVVPDLFGTAIPEATHEALSGYTLPIDESVLAHTRVAWPAGETA AHDR LKRFAQA  
KLSAYSVDRDFPALDGCSSMSGYLTAGVISARACFNVARAANGGQIDTGDKGAVHWMQELVWREFYRHILVAF  
PRVSMNQPFKLDTKLVKWT DHPATKDEAERHFTAWCEGKTGYPIVDAAMRLVREGYLSNRLRMVAAMFLTK  
DLLIDWRRGERFFMRHLIDGDLAQNNGGWQWSASTGTDSQPYFRVFN PYLQSEKFPDAVTIRKYVP ELRAVK  
DSKALHEPHARLPAAVFVRTGYPRPIVDHKAARVRAINAFKIAAGKV

>Alopecoenas\_beccarii\_NXW85743.1\_CRY2\_prote

RFLQSLLEDLDNSLRKLNSRLFVVRGQPTDVFPRLFKEWGVTRLTFEYDSEPFPGKERDAAI IKLAKEAGVEVV  
IENSHTLYDLDR I IELNGHKPPLTYKRFQAIISRMELPKKPVSTIMSQQMEACKVDIQENHDDVYGVPSLEEL  
GFPTDGLAPAVWQGGETEALARLDKHLERKAWVAN YERPRMNANSLASPTGLSPYLRFGCLSCRLFYRLWE  
LYKKVKRNSTPPLSLYGQLLWREFFYTAATNNPKFDRMEGNPICIQIPWDRNPEALAKWAEGKTGFPWIDAIM  
TQLRQEGWIHHLARHAVACFLTRGDLWISWESGVRVFDEL LLDADFSVNAGSWMWLSCSAFFQQFFHCYCPVG  
FGRRTDP SGDYVKRYLPKLKGFP SRYIYEPWNA PESVQKAAKCIIGVDY PKPMVNHAETSRLNIERMKQIYQQ  
LSRYRGLCLLASVPSCVEDLSGPVTD SASGQGCSTSTAMRLSQADQASPKRKHEGAEE LCTEDLYKRAKV TGL  
PAPEIPGKSV

>Alopecoenas\_bec\_NXW86659.1\_CRY1

MPHRTIHLFRKGLRLHDNP TLLAALESSETIYPVYVLDRGFLTAAMHIGALRWHFLLQSLLEDLHKNLSHLGSR  
LLVIQGEYECVLRDHVQKWNITQVTLD AEMEPFYKEMEANIRRLGAELGFEVLSRVGHSLYD TKRILD LNSGN  
PPLTYKKFLHILSLLDGDEVPVRNLTAEDFQRCRSPDPGLAERYRVPVPADLEIPPQSLSPWRGGETEGLRRL  
EQHLTDQGWVANFTKPR T IPNSLLPSTTGLSPYFSMGCLSVRTFFHRLSN IY AQAKHSLPPVSLQ GQLLWRE  
FFYTVASATQNF TQMAGNPICLQIRWYEDAERLHKWKTAQTGFPWIDAIMTQLRQEGWIHHLARHAVACFLTR  
GDLWISWEEGMKVFEELLLDADYSINAGNWMWLSASAFFHHYTRIFCPVRFGKRTDPEGQYIRKYL PVLKNFP  
TKYIYEPWTASEEEQRQAGCIIGRDYPFPMVNHKEASDRNLQLMRRVREEQC GTAQLTRDDADDPMETKRDCS  
EENTAKAARME

>Alopecoenas\_bec\_NXW94530.1\_CRY1

VLQEWNITKLSIEYDSEPFPGKERDAAIKKLASEAGVEVIVRISHTLYDLDKI IELNGGQPPLTYKRYQTLISR  
MEPLEMPVETITPEVMEKCTTPVSDDHDEKYGVPSLEELGFDTDGLPSAVWPGGETEALTRLERHLERKAWVA  
NFERPRMNANSLASPTGLSPYLRFGCLSCRLFYFKLTDLYKKVKNSSPPLSLYGQLLWREFFYTAATNNPR  
FDKMEGNPICVQIPWDKNPEALAKWAEGRTGFPWIDAIMTQLRQEGWIHHLARHAVACFLTRGDLWISWEEGV  
KVFEELLLDADWSVNAGSWMWLSCSSFFQQFFHCYCPVGFGRRTDPNGDYIRRYLPVLRGFP AKYIYDPWNA P  
ESIQKAAKCIIGVNYPKPMVNHAESRLNIERMKQIYQQLSRYRGLGLLATVPSNPNGNGNGGLMGYSPGESI

SGCGSTGGAQLGTGDGHTVVQPCALGDSHTGASGIQQQGYCQASSILHYAHGDNQQSHLLQAGRTALGTGVSA  
GKRPNPEEETQSVGPKVQRQSTN

>Alosa\_alos\_\_KAG5267328.1

MVVNTIHWFRKGLRLHDNPSLRESIQGADSVRCVYILDPWFAGSSNVGISRWRFLLQCLEDLDASLRKLNLSRL  
FVIRGQPTDVFPRLFKEWNI SRLSYEYDSEPFQKERDAAIKKLASEAGVEVIVRISHTLYDLDKIIELNGGQS  
PLTYKRFQTLISRMEPVEMPAEVITADVMGSCCTPIADHDHDDKFGVPSLEELGFDTEGLSSAVWPGGETEALT  
RLERHLERKAWVANFERPRMNANSLASPTGLSPYLRFGCLSCRLFYFKLTDLFRKVKNSSPPLSLYGQLLW  
REFFYTAATNNPRFDKMEGNPICVQIPWDRNAEALAKWAEGRGTGFPWIDAIMTQLRQEGWIHHLARHAVACFL  
TRGDLWISWEEGMKVFEELLLDADWSVNAGSWMWLSCSSFFQQFFHCYCPVGFGRRTDPNGDYIRRYLPILRG  
FPAKYIYDPWNAPE SVQKAAKCIIGVHYPKPMVNHAEEASRLNIERMKQIYQQLSCYRGLGLLATVPSNPNGNG  
ESSSGMMGFPTAENTQESLAATSSGYQMPMASQGEHWSGVMAYPQTDPKAQRSGYVGNSSSMACYRQEAQQMP  
GPSVQQAWAPRCSGRAALSQEFQ

>Alosa\_alos\_\_KAG5273095.1

MPVDSRVSQVRHLLRELLAGREDPESFFCFCVSILGHQETRVRFRELISPITYVHHQLHSQLLSIYQEYFLRD  
VDDELELALALSLVNTNQTSTQQPVPRSYAQLASATPAAPVRGHTQGMDTNISMGTHKTPGWTGKSPNVPKTP  
DRPKESVTNKTATSENKGKAEATSSLANDNDSQEKLDADNQSEMSRKSRRRRQRKRQQQLLKSPSSPRPILMW  
FRDLRLLDN PALIGCLELGGPVIPLFLWNDQEEEGPGVT VATGGACKYWLHQALVCLNQALERIGSHLLTVK  
AEPSSAEVLQRLVKETGAGTVVATALYEPWLKERDEGVASTLQQQGISWQLHHSYCLRDPYTVTTQGVGLRGI  
GSVSHFMSCCQONPTGAQGTPLDAPPTLPVPSTWPTGCPLEQLGLARMPRRKDGT TVDWAVNIRRDWDFTEEG  
AHARLEAFLQDGVYRYEKESGRADAPNTSCVSPYLHWGQLSPRWLLWDARAARCRSPKFQRKLAWRDLAYWQL  
TLFPDLPWESLRPPYKALRWSSERAHLRVWQKGTGTYPLVDAAMRQLWQTGWMNNYMRHVVASFLVAYLHLPW  
QEGYRWFQDTLVDADVAIDAMMWQNGGMSGLDHWNFMHPVDAAMTCDPIGTYVRRWCPELAPLPDELIHKPW  
KCPTSILRRAGVVLGQTYPERVVTDLEERTQSLRDVAEVRQRFKEYVDQHSGCDLVPLPDLRVEEALGSTGE  
VLRCGSRFLLPVITRMEFKHQ TADPKADGRGNPYNAVLKGYVSRKRDETI AFLNERDFTASVMHESTQQRER  
AERHHCLLEGLPASPSATSRRGRPRTPSKDPYSIVPGGVAMPQR

>Alosa\_alos\_\_KAG5274603.1

MSRFLKSVSSSLQLSEGPPVARSKPPPTVPATTAMPNRTIHLFNKGLRLHDNPTLVAALESSAAVYPVFLDR  
HFVESSTRMGALRWRFILQSLEDLHRS LQRLGSRLYVLQGTHEAVLRRLVAQWGITQLSFDVEVEPHYKRLDE  
ELRAMASELGLGLVLSCAHTLYDVKRI IKANGGQPP LTYKKFLQVLSILGKPDMPAREITEMDIQKCPMPSNE  
GGEHYQVPSLSELGLEVDSEVLWPGGESHALERLERHFQSQGWVANFSKPTIPNSLLPSTTGLSPYLSLGC  
LSVRTFYHRLSKIYAQSKNHS LPPVSLQGQVLWREFFYTAALATPNFTRMVGNPICLQIGWYEDPEALKKWK  
AQTGFPWIDAIMTQLRQEGWIHHL SRHAVACFLTRGDLWISWEEGMKVFEELLDADYSINAGNMMWLSASAF  
FHQYTRIFCPVRFGRRTPDGHYLRKYL PVLKNFPSKYIYEPWNAPE DVQLQSGCIIGKDYPLPIVNHL DASQ  
RNMALMKTVRCEQANTTELTRDVADDPMEVGVKRELSEEDAVAQGDGTECNGGISVGKKHCSSNEGRTCSWT  
PDTHRLQEISSKVM

>Alosa\_alos\_\_KAG5286003.1

MTSKKTI SPDIPIIQVDAHNVVPCWEASGKLEYSARTIRGKITKLLPTFLTEFPVVDKHPHSSSRTAKAVNWS  
EILSSLVDRGVGEVDWAKPGTSGGMAMLESFIDQRLGDFAA LRNNPNVAALSQ LSPWIFHGHL SAQRVVRQV  
QKNGKKFSDSVASFTEELVVRRELADNFCFYKNYDNIEGAYEWARKTLQDHAKDKRTHVYTREOLEQAKTHD  
KLWNAAQTVLTEGKMHGFM RMYWAKKILEWTSSPEEALAI AIYLNDRYSLDGC DPNGYVGC MWSICGIHDQG  
WAERPVGKIRYMNYDGCKRKFDVAQYERRYSKKEV

>Alosa\_sapi\_\_XP\_041922980.1

MSSSRTIICLLRNDLRLHDNEVFHWAQKNAEHIVPLYCFDPLHYLGTSCFNFPKTGPFRRLRFLLD SVNDLRAS  
LKKRGSNLVVRGKPDQVVGDLIKQLGSVTAVAFHEEVTQEEKEVEKQIKDVCLKNQVKVQSFWGSTLYHRHD  
LPFNHISRLPDVYTQFRKAVESQSRVRPVLPTPAQLRSLPLGLEEGPVPTYQDLEQLEPVT DPRSAPFCHGGE  
SEALARLKHYFWD TDAVATYKETRNLGIGVNYSTKFAPW LAMGCISPRYIYEQIKKYE QERTANQSTYWVIFE  
LLWRDYFRFVALKYGNRLFHLNGLQDKHVPWKTD MKLLDAWKEGRTGVPFVDANMRELALTGFMSNRGRQNV  
SFLT KDGLDWRMGAEWFEYLLVDYDVCSNYGNWLYSAGIGNDPRENRKFNMIKQGLDYDNNGDYVRQWVPEL  
QGIKGDDVHTPWALSSGALSHAKVSLNETYPSPVVMAPEWSRHVNKKPSGSGSPAARGRKGLSHTPKQH KDRG  
IDFYFSKSRGLKTSNEGL

>Alosa\_sapi\_\_XP\_041944778.1

MPNRTIHLFNKGLRLHDNPTLVAALESSAAVYPVFLDRHFVESSTRMGALRWRFILQSLEDLHRS LQRLGSR  
LYVLQGTHEAVLRRLVAQWGITQLSFDVEVEPHYKRLDEELRAMASELGLGLVLSCAHTLYDVKRI IKANGGQ  
PPLTYKKFLQVLSILGEPDMPAREITEMDIQKCPMPSNEGGEHYQVPSLSELGLEVDSEVLWPGGESHALER  
LQRHFQSQGWVANFSKPTIPNSLLPSTTGLSPYLSLGC LSVRTFYHRLSKIYAQSKNHS LPPVSLQGQVLWR  
EFFYTAALATPNFTRMVGNPICLQIGWYEDPEALQKWKMAQTGFPWIDAIMTQLRQEGWIHHL SRHAVACFLT  
RGDLWISWEEGMKVFEELLDADYSINAGNMMWLSASAFFH QYTRIFCPVRFGRRTPDGHYLRKYL PVLKNF  
PSKYIYEPWNAPE DVQLQSGCIIGKDYPLPIVNHL DASQRNMALMKTVRCEQANTTELTRDVADDPMEVGVKR  
ELSEEDAVAQGDGTECNGGISVGKKHCSSNEGRTCSWTPDTHRLQEISSKVM

>Alosa\_sapi\_\_XP\_041961620.1

MTHNCIHWFRKGLRLHDNPALIAAMRDCKQLYPVFILDPWYPNNTKIGINRWRFLIGALKDLDLCSLRELNSRL  
FVVRGKPDVLPFLFNKWKITRLTFEVDTEPHSLQRDEEVLKLARDHGVVEVIQKISHTLYNLERI IDENHGKA  
PLTYVRFQTVLKGVGPPKRFPVPPPTLGNMKGVSTPCTDKHEEKYGIPTLDELGQDPQLACPEVYPGGEQEALK  
RLDEYMDKQAWVCSFEKPQTSFNALSPSTTVLSPIYRFGCLSAFTFWWRLSAVYQGGKHSQPPVSLHGQLLWR  
EFFYTAALGVPNFKMEGNPVCVQVDWDNNPDHLAAWREARTGFPFIDAIMTQLRQEGWIHHLARHAVACFLT  
RGDLWVSWEEGQKVFEELLLDADWALNAGNWQWLSASAFFHQYYRVYSPIAFGKKTDKHGDYIKKYLPLKKF  
PEQYIYEPWKAPRSVQEQAGCIVGKDYPRPIVEHEVISKKNIQRMKAAYAKRSPQTDSPAKEKGKKHKGESI  
KDMLTKKKKSA

>Alosa\_sapi\_\_XP\_041964697.1

MPVDSRVSQVRHLLRELLAGREDPESFFCFCVSILGHQETRVRFRELISPITYVHHQLHSQLLSIYQEYFLRD  
VDDELELALALSLVNTNQTSTQQPVPFRSYAQLASATPAAPVRGHTQGMDDTIDSMGTHKTPGWTGKSPNPVKT  
DRPKESVTNKTATTENKGAETSSLANDNDSQEKLDADNQSEMSRKSRRRRQRKRQQQLLKSPSSPRPIIMW  
FRDLRLLDNPALIGCLELGGPVIPLFLWNDQEEEGPGVTVAAGGACKYWLHQAALVCLNQALERIGSHLLTVK  
AEPSSAEVLQRLVKETGAGTVVATALYEPWLKERDEGVASTLQQQGISWQLHHSYCLRDPTYTVTTQGVGLRGI  
GSVSHFMSCCQONPTGAQGTPLDAPPTVPVPSTWPTGCPLEQLGLARMPRRKDGTTVDWAVNIRRDWDFTEEG  
AHARLEAFLQDGVYRYEKESGWADAPNTSCVSPYLHWGQLSPRWLLWDARAARCRSPKFQRKLAWRDLAYWQL  
TLFPDLPWESLRPPYKALRWSSERAHLRVWQKGTGTYPLVDAAMRQLWQTGWMNNYMRHVVASFLVAYLHLPW  
QEGYRWFQDTLVDADVAIDAMMWQNGGMSGLDHWNFMHPVDAAMTCDPIGTYVRRWCPELAPLPDELIHKPW  
KCPTSILRRAGVVLGQTYPERVVTDLERRTQSLRDVAEVRQRFKEYVDQHSGLDLVPLPDLRVEEALGSTGE  
VLRCGSRFLLPVITRMEFKHTADPDKADGRGNPYNALVKGYSRKRDETI AFLNERDFTASVMHESTQQRER  
AERHHCLLEGLPASPSATSRRGRPRTPAKDPYSIVPGGVAMPQR

>Alosa\_sapi\_\_XP\_041966611.1

MVVNTVHWRKGLRLHDNPSLRDSIRGADTLRCVYILDPWFAGSSNVGISRWRFLQCLELDASLRKLNSRL  
FVIRGQPTDVFPRFLKEWDISRLSYEYDSEFPFGKERDAAIQKLASEAGVEVTVRISHTLYELDKISELNGGQS  
PLTYKRFQTLISRMDVVEEPVDTITPELMGHCVTPI SDDHDDKLGVPSSLEELGFETDGLSTAVWPGESEALT  
RLERHLERKAWVANFERPRMNANSLASPTGLSPYLRFGCLSCRLFYSKLTDLRYKVKKNSAPPLSLYGQLLW  
REFFYTATNNPRFDKMEGNPICVQIPWDRNAEALAKWAEGRTGFPWIDAIMTQLRQEGWIHHLARHAVACFL  
TRGDLWISWEEGMKVFEELLLDADWSVNAGSMMWLSCSSFFQQFFHCYCPVGFGRRTDPNGDYIRRYLPILRG  
FPAKYIYEPWNAPEGVQKAAKCIIGVHYPKPMVNHAEEASRVNIERMKQIYQQLSCYRGLGLLATVPSNSSNAA  
EGMAAGPSSGDTQEGASTSGGSLMVHQREGQVGTVPVGAHGEPCHAETSHHHQOQQQQQGFQFTMGEEATTSRHOQA  
QPATLQGRGTTGTIKRRNEDFGSSRSKVRQNSH

>Alosa\_sapi\_\_XP\_041967619.1

MVVCGLLYLSALRHSIVKFRPAKAEPLSQAFPGPCLRIYSTSDTIMAPKKADLKRKAQSLKTSRAKQQKVDR  
VEGWLESQVAELRREARDMKFNKRRLRFLSDTETVQQGSEGVLYWMGRDQRVQDNWALIYAQQLAITEKLPLH  
ICFCLMPTFLEATFRHYSFMLKGLQEVAKESSVLDIQFHLLSGFPDGLPGFIKEWNMGVVTDWFPLRDPTQ  
WVDDVKKTISPDIPIIQVDAHNVPWCWEASGKLEYSARTIRGKITKLLPTFLTEFPVVDKHPHSSSRATAKVN  
WSEILSSLVDRGVGEVDWAKPGTSGGMAMLESFIDQRLGDFAAALRNNPNVAALSQLSPIWHFGLLSAQRVVR  
QVQKNGKKFSDSVASFTEELVVRRELADNFCFYNNYDNIEGAYEWARKTLQDHAKDKRTHVYTREOLEQAKT  
HDKLWNAAQTVLTEGKMHGFMRYWAKKILEWTSPEEALAIAYLNDRYSLDGCDPNGYVGCWMSICGIHD  
QGWAERPVGKIRYMNYDGCKRKFVDAQYERRYSKKEV

>Amazona\_aest\_\_KQK77804.1

MSGSVRTAICLLRCDLRAHDNQVLHWAQSNADFVPLYCFDPRQYLRTHCYGFPGTGPRLRLFLLESVKDLRE  
TLKKKGSTLVVRKGKPEDVIHDLITQLSSVSAAVVFHEEAXQEELDVEKELCRVCSQHGVKVHTFWASTLYHRD  
DLPFRPIARLPDVYTHFRKAVESEAKVRPTLRMADQLQPLAPGVEEGCIPTMEDXGQKALIELVLENLLVXYA  
NIXFPSEPEQPFNSNWLXSEGQGEFRFPYIPCINLVASYKEIRNGLVGMDYSTKFAPWLALGCISPRYIYEQ  
IKKYEKERTANQSTYWVLFELLWRDYFRFVALKYGRRI FSLREGKTGVFPVDANMRELAATGFMSNRGRQNV  
SFLTCDLGLDWRMGAEWFEYLLVDYDVCSNYGNWLYSAGVGXDPRDNRKFNVMVKQGLDYGNGDYVRMWVPEL  
QGIKGADIHTPWALSSAALSQAGVTLGETYQPPIVTAAEWSRHISQRPVAFRLRFFMDIHSADIPTGE

>Amazona\_aest\_\_KQK79631.1

MRRRQRKRKASEEEVPSVSLRTEKEEKVQEAWRRAAPSVREFKFNKKRVRLISQGSDLKDDGRCILYWMSR  
DQRLQDNWAFLYAQRLAXKQELPLHVCFLVPKFLEATIRHYGFMLRGLQEVAAEECAELNIAFHLLRGYAKDV  
LPAFVVEHGVGGLVTDFSPLRLPWQWVQDVRELRPELDPFAQVDAHNIVPCWVASPKQEYSAYTLRGKIHAQL  
PEFLTEFPVPHHPYSPSCPAEPIAWEACYSSLEVDRTVKEVEWATPGTAAGLAVLQSFIRKRLKYFGSHRND  
PNKAALSNLSPWFHFGQVSTQRAILEVQKHQHKYKESVDVFMEEA VVRRELAENFCYNNENYDRVQGAYPWAQ  
TTLKLHAKDERPFLYKLEELEQGTTHDPLWNAAQKILEWTHSPEEALQFAIYLNDRYELDGRDPNGYMPPSRG  
NADAVCPHPAGCLWSICGIHDHGWTERAVFGKIRYMNYAGCKRKFVGRFERRYAPCTLSQ

>Amazona\_aest\_\_KQK81400.1

MGVNAVHWRKGLRLHDNPALRECIQGADTVRCVYILDPWFAGSSNVGINRWRFLQCLELDANLRKLNSRL  
FVIRGQPADVFPRLFKEWNIAKLSIEYDSEFPFGKERDAAIKKLASEAGVEVIVRISHTLYDLDKI IELNGGQP  
PLTYKRFQTLISRMEPLEMPVETITPEVMEKCTTPVSDDHDEKYGVPSLEELGFDTDGLPSAVWPGETEALT

RLERHLERKAWVANFERPRMNANSLASPTGLSPYLRFGCLSCRLFYFKLTDLYKKVKKNSSPPLSLYGQLLW  
REFFYAATNNPRFDKMEGNPICVQIPWDKNPEALAKWAEGRTGFPWIDAIMTQLRQEALTCLLRAKAVTFCS  
RVWHLGTEHSVNIARRYLPVLRGFPKAKYIYDPWNAPEISIQKAAKCIIGVNYPKPMVNHAEASRLNIERMKQIY  
QQLSRYRGLGLLATVPSNPNGNGGLMGYSPEGESISGCSSAGGKSCIHKTVLRELSEWELVMVIQLFSHVLGTLI  
QQEQVEFSSKVPVKQVVSYIMLMETISNHTYCKQEERPLVLALVQNAQIQKKKLALDQKSSDRAQIKLHYW  
KRPYHSKNTQDKIPATLYRN

>Amazona\_aest\_\_KQK85176.1

MAAVALGPAPARCRSVHWFRRLHLDNPALQAEALRDAASLRICIYILDPWFFAASSAVGINRWRFLQSLLEDLD  
NSLRKLNSRLFFVVRGQPTDVFPRLFKEWGVTRLTFEYDSEPFGERDAAIKLAKEAGVEVVIENSHTLYDLD  
RIIELNGHKPPLTYKRFQAIISRMELPKKPAWVANYERPRMNANSLASPTGLSPYLRFGCLSCRLFYRYLWE  
LYKKVKRNSTPPLSLYGQLLWXEFFYTAATNNPKFDRMEGNPICIQIPWDRNPEALAKWAEGKTGFPWIDAIM  
TQLRQEGWIHHLARHAVACFLTRGDLWISWESGVRVDFELLLDADFSVNAGSWMWLSCSAFFQQFFHCYCPVG  
FGRRTDPSGDYVKRYLPKLGKGFPSRYIYEPWNAPESVQKAAKCIIGVDYPKPMVNHAEASRLNIERMKQIYQQ  
LSRYRGLCLLASVPSXVEDLSGPVIDSASGQGCSTSTAVRLSQADQASPKRKHEGAEELCTEELFKRAKVTGL  
PAPEVPGKSL

>Amblyraja\_radiata\_XP\_032894640.1\_cryptochro

MVRNAVHWFRLRLHLDNPALQALSGADTVRCVYILDPCFAGSSNIRINWWRFLIQSLEDLDISLRKLKSRL  
FVVRGQPTDVFPRLFKEWNVTLTFEYDSEPFGERDAAIMKLAKIAGVEVIVQISHTLYDVDRIKANGNHA  
PLTYKRFCAIIRKLKLPKAPVNTVTLQMEKCTQNMQESQEEQYGIPSLLEELGFDTSSELCCAVWQGGETKALA  
WLHKHFEGKACTASYESSNLNPDLSMSSSTGLCPYLCLGCLSCRFYITLLEFYRMDHNKSPLPLYGELLRRE  
FFYTAATNNPRFDRMEGNPVCVQIPWDKNQALAKWADGQTGFPWIDAIMKQLRQEGWIHHLARRAVGCFLTR  
SDLWISWEEGMKVFNELLLDADFSVSAGWMMWLSCSAFFQRFPLPCYCPVAFGRRTDPNGDYVRQYLPILRGYP  
TKYIHDPWNAPEVEVQAAKCIIGVHYPRPMVNHIEAIRLNTERMKQIYLQLSHDKGLCLPVMALSLTDNQESS  
IAKSDGHGKETGSCSANHDKTPNVFGKRGKPEANAENRDEFKQIKIPRLQAPEDVSRKAPEPMVIED

>Amblyraja\_rad\_XP\_032893747.1\_cry-1

MGCNSIHWFCGLRLHLDNPALLESVQGVDTIRCVYIVDPWFAGTSSLAINRWGFLQCLELDLTNLRKLNSRL  
FVIRGQPADVFPRLFKEWNISRLSFEYDSEPFSSKKRDAVIKKLATEAGVEVIMRISHTLYDMEVIERNGGQP  
PLTYKHFQKLISQMGVPVEMPVKMITSETMGRCTMPVLDDHGDGRFGVPSLEELGFETEGLTSAVWPGGETEALA  
RLERHLERKAWVANFERPGMNSKSLLASPTGLSPYLRFGCLSSRLFYFKLTLEYKKVKKNSSPPLSLYGQLFW  
REFFYAAGTNNPKFDKMEGNPICVQIPWDRNPEALAKWAEGKTGFPWIDAIMTQLRQEGWIHHLARHAVACFL  
TRGDLWISWEEGMKVFEELLLDADWSVNAGNMMWLSCSSFFQQFFHCYCPVGFGRRTPNGDYIRRYLPVLRG  
YPAKHIDPWNAPEDVQRAANCVIGVDYPRPMVHHAASRLNIERMKQIYQQLSCYRGLGLLASVPSNPSGSG  
GIMQYSAEETIPGCSNVADRNTLEGLTAGKLFNPEEEMSGIGLKYQRQSM

>Amborella\_tri\_blue-light\_XP\_006854471.1

MESNPHSDSNPSAPVEEQEEQQAQNTLSLSSSNLTTPYASISLSLSSLFSSSSILSSPKPPFKPSQTACFTHI  
PLKPSVSLQFRNLNFSQAPKSNKSSISAASLSTPLFQTPHLSSEPSNPVGGKCSIVWFRNDRVHDNEALN  
SANEESISLLPVYIFDPRDYGKSSSGFDKTGPYRATFLDCVSNLRENLLKRGSDLVVRIGKPESVLTELKVA  
VGADGVYAHMEVSHDEVKGEERVEKVIRENGVECKLFWGSTLYHIEDLPFGLEDMPSNYGGFRERVKGLAVRK  
TIEALDRKGMKPRGGVEPGDLPTLMDLGLSPASTVSKDGKPAANASLVGGETEALERLKRFASECLAQPYKG  
DKANGRDSIYGANFSCKISPLWAMGCLSPRFMFNELKKGAKRMGFASVSQKTNEGATDGGMNWLMFELLWRDF  
FRFITKKYSSNKKNIATPATACTGALA

>Amborella\_tri\_ERN14624.1\_AMTR\_s0003

MTRFGVELATLHGDTSRCSRSDTLTFEDESEKGSNALLARAWSPGWSNADKALTNFINGPLIEYSINRKKADSA  
TTSLLSPHLHFGEVSVRKVFHLVRIKQVFWANEGNTAGEESINLFLKSIGLREYSRYLTFNHRSSHERPLLGH  
LKFFPWVDESIFYKAWRQGRGTGYPLVDAGMRELWATGWLHDIRVVVASFFVKVLQLPWTWGMKYFWDTLDDA  
DLES DALGWQYISGTLPSREFDHIDNPQIEGYKFDPOGEYVRRWLPELARLPTEWIIHHPWDAPHSVLQAAGV  
ELGTNYPLPIIEISAAKERLQEAELSEMWQLEANSRAAMENGTEEGLGDSSESPLDFPQEEMEVDNQPARPTG  
QIGATRRLADQMVPMSMTVSSFRVEEEEEPSNTGSSRDNRPEVPSNASFGSEADRRDEVNLGNMGELERERN  
ASEFNVSVSLQNAVHFTAESSSSLRERDGGVVPVWSPSTSSRSEQLIGEESGLNGGSYLQRHAQSHQLMTWR  
QISRTRSRNWEVDNAVQPNAIG

>Amborella\_tri\_XP\_006841901.1\_(6-4)DNA\_p

MEVNSLMWFRKGLRIHDNPALDYATKNAKHLYPVFVLDPLYLNPDTSAFSPGSKKSALNRIQFLLESLSLDLS  
SLKALGSLRLLLFNGDPVHTIKRLNLRWNIGRLCFEFDTEPYSLTRDGQVQDFASHTGIEVFSPVSHTLDFPRE  
VIKKNGGKPLTYQSFLRIVGIPSPPHANTISSLPPLGNIEDSEVSNVPTIEELGYADVQEEYSPFRGGESE  
ALKRLKASLMDKDWANFEKPKGKPTSFENPATTVLSPYLKFGCLSSRLFYQGLQDVFEVKKHTLPPVSLVG  
QLLWREFFYVVAIGTPNFDQMGKNKICKQIPWSGDDKLFIAWREAQTGYPWIDAVMVQLRKWGMHHLARHAV  
ACFLTRGDLFVHWEKGRDVFERLLIDSDWAINNGNWLWLSCSSFFYQYNRIYSPTSFAKKYDPSGIYIRHFIP  
VLKDMPEDYIYEPWTAPLEVQIKANCVIGRDYKPKVVDHDIVSKDCRRKMGAAYAMNSTASDVVTGEELGSLG  
RKLEKQPIQISDTTKKQKQLKFTDYL

>Amborella\_tri\_XP\_006851849.2\_photolyase

MYLCRISPLNLCYSRVLGFLFIQASSLKVPLISSFCTSRLLSSSSSSMEPAKKSMKKRSEEGAPSSNGRLLKKLKN  
KSGIGMESEPEDEETGVKVQSGRVRVLKAGETGGNGPVVYWMFRDQRCNDNWALVYALEQGARLNVVVVAFN  
LFDQFLGAKARQLGFMLRGLRDLEQSLKVLGVPPFFLFRGEADENIPKFTSQCNASLLVTDIFSPLRIIQNIKEN  
ICHRVTEEIPVHEVDAHNIIVPVWVASDKLEYGARTIRTKINKLLPEYLTEFPDLKAPQIRWKDESPVEIDWEN  
LIAEVLRLKGGAVPEVHWIEPGEQAALDMLMGSKNGFLSTRLKNYSTDRNNPSRPGKLSCLSPYLHFGQISSQR  
CALEARKFRKLYSQSVDSFLEELIVRRELADNFCFYQPNYDSLQGAWEWARKTLRDHAGDKREHIYTMEQLEK  
AKTADPLWNASQLEMVHYGKMHGFMRMYWAKKILEWTSGPTEEALSIHNLNDKYELDGRDPNGYVGCMMWSICG  
IHDQGWRETSVFGKIRYMNYAGCKRKFDVDGYIAYVKKLAAETKKRVPIKEIMEHNN

>Amborella\_tri\_XP\_020524346.1\_cry-1\_isof

MNMGTHCKTIVWFRDLRIEDNPALAAARVGCVLFPVYIWCPEEGQFYPPGRVSRWWLKQSLVHLDQSLRSLG  
APLLLIKTEDTSLALLRCISAIGATQVVYNHLYDPVSLVRDHCVKQKLVEQGIIVQSLNGDLLYEPWEVYDDE  
GLAFTTFDEYWNKCISMSVEPVCLLPVRLVPASEKMGCTIEELGLENEYEKSSNALLSRAWSPGWCHADKA  
LSEFISQRLEDYSMNRLLKAEGLGTALLSPYLHFGELSIRKVLHSSVRMKQLSWAREGNSDAEESVNLFLRSIGF  
REYSRYLCFNFPFTHEKSLGLNLKFFPWRTDHSNFKAWRQGRGTGYPLVDAGMRELWATGWLHNRIRVVVSSFC  
VKFLQLPWTWGMKYFWDTLLDADLECDILGWQYISGSLPDGHEDRLDHPEDQGYKFDPEGEYVRQWLPELAR  
MPTEWIHHPWDAPVSVLKAAGVELGLNYPNPIVEIDSAKECLAQSLSKMWELEAASRTAKANGSDENVGDNLN  
SINEIPNVPRVVIKKKEAPESSSWDQRVPTVQSMHKRNGVNNLVGEDVNRVNLNRNQINGGEVLSRNDEMSSTA  
DSSSIRKRSNLNESCFNVPSSSLPQSGSWLKGDIDIDEVSTSKVWLKASS

>Amborella\_tri\_XP\_020526959.1\_cry\_DASH,

MTLSLSSPISAFPLKRLFFPTSLSKPSIPTVFLSLSLAKHCLNMSSVPVSLPKYDFQTNWDVPQFSDDQMDAV  
ADETLKRYSLSRDRKRNESGVAIVWFRNDRVLNDNEALFQAWKSSQAILPVYCLDPRLFGTTHYFGFPKTGAV  
LRAQFLIDCLANLKKNLMKRGLNLLIQHGKPEDILPSIAKAFGAHTVYAHQETCSEEILVEKLLTNSLRVVL  
PPVDIATSIPKTPKLQLIWGSTMYHLDDLPGSSSNVPDVYTQFRKSVEKCKIRGCIKIPPSLGLPLPSGSLDE  
IGGWGCVPSLDQLGLNMEKHNGGMHFIGGENAALARVNEYFWNKDLLRVYKETRNAMLGPDYSTKFSPLWAFG  
CLSPRYAYEEVKRYEKERVANDSTYWVLFELIWRDYFRFLSIKYANSIFHLGGPRRVKGLNWNQDMALFESWR  
DGRTGYPLIDANMKELNSTGFMSNRGRQIVCSFLVRDMGLDWRMGAWEFETCLVDYDPCSNGYGNWYTGAGVGN  
DPREDRYFSIPKQAQTYDPEGEYVSYLPELRLVLPKEKRHFPGTSYIKQVVPLKFGNANPRNSNQFKGQSHRG  
GFERRKGQRS

>Ameiurus\_mela\_\_KAF4089512.1

MRGISGRIIRCGLVVRNFSVIMSENKRNLKRKGEPMKGLEKPGAARGAERGAGWLQEKVAEMRRNSSECKFNT  
KRLRFLSDAKKARQCGGAVLYWMARDQRVQDNWALVYAAQLALEENLPLHVCFCCLVPRYLEATYRQYAFMLRG  
LQEVAKECTSLSIQFHLLRGEPELTLPFGFVKHWDVGAVVTDNFNRLPLQWTERVKKELPPDIPFVQVDAHNV  
VPCWGASSKLEYAARTIRGKITKLLPEFLTEFPVVMHPPHSTKTAKKVDWEKVMSSLEVDRSVGEVLWAOFG  
IAGGVTMLESFIDQRLRIFASERNPNANALSQSPWIHSGQLSAQRVLLEVVKRWGKHSTESVSSFTEELLVR  
RELSDNFCFYNDNYDNINGAYDWAKTLQDHAKDARPYLYTREQLENADTHDQLWNAQAQRQLMLEGKMHGFMR  
MYWAKKILEWTASPEEAVNISIYLNDRYALDGCDPNGYVGCMMWSICGIHDQGAERPVGKVRYMNYAGCKRK  
FDVGQFERRYAGKKA

>Ameiurus\_mela\_\_KAF4091667.1

MVVNAVHWFRLRLHDNPSSLLESVVGADSLRCIYILDPWFAGSSNVGINRWRFLQLCLEDLDASLRKLNSRL  
YVIRGQPTDVFPRLFKEWKITRLSYEYDSEPFGERDAAIKKLANEAGVEVIVRISHTLYDPEKIIELNGGQS  
PLTYKRFQTILSRMDAVIDPAETITAEILSKCIMTVCDHDERFGVPSLEELGFETKALPSAVWPGGETEALT  
RLERHLERKAWVANFEHPRMNANSLASPTGLSPYLRFGCLSCRLFYFKLTDLYKKVMKNSVPPLSLYGLLW  
REFFYTAATNRPSFDKMEGNPICVQIPWDRNSEALAKWAEGRGTGFPWIDAIMTQLRQEGWIHHLARHAVACFL  
TRGDLWISWEEGVKVFEELLLDADWSVNAGSMMWLSCSSFFQQFFHCYCPVGFGRRTDPNGDYIRRYLPILRG  
FPAKYIYDPWNAPESVQKLAKCIIGTHYPKPMVNHAEASRNINIERMKQIYQQLSCYRGLGLLASVPSNASGNR  
EDAGASLNSTDHTQESSAAGRGTHTLKRHSEESVSNLGCKIQKKNSDEPHSVTTAHTSQAVSRM

>Ameiurus\_mela\_\_KAF4094369.1

MVVNSVHWFRLRLHDNPALQALNGADTARCVYVLDLPWFAGAANVGVRWRFLLESLEDLDTSLRKLNSRL  
FVVRGQPADVFPRLFKEWNVTRLTFEYDSEPYGKERDGAIIKLAQEFVGVETIVRHSHTLYNPDRIIEMNSNNP  
PLTFKRFQAIVSRLELPRKPLSTITPEQMASCQAQLSENHDEHYRVPSLEELGFKTPGEPVWRGGETEALDRL  
NKHLDDKAWVANFERPRKIAHSLFASPTGLSPYLCFGCLSSRVLYYHLRELYMKLRHSSPPLSLFRQLLWRE  
FFYTAASNNPSFDRMEGNPICVQIPWDQNEALAKWAEGRGTGFPWIDAIMRQLRQEGWIHHLARHAVACFLTR  
GDLWISWESGMRVFEEMLLDADWSVNAGSMMWLSCSAFFQQFFHCYCPVGFGRRIDPSGDYIRRYIPELKDY  
SRYIYEPWNTPESLQKAANCIVGVDYKPKMINHAESSRLNINIERMKQVYQQLSHYRGLSLLASVPTIQEEAEPS  
MSDDSQASSSGALSASRQPQSECRPSQTDPDNPQDPEPSSSAPAMRKRACSDRADEDEGQ

>Amia\_calv\_\_MBN3298502.1

MSRDQRVQDNWALLYAQQLALAEERLPLPMIFDSVMIFFLSISFYLLLSLSTVYSDFLCVYQECALGLEFHL  
LQGCAGERLPRFVQELGVGAVVTDIFSPLRVPLQWVEEVKKALPRDISLIQVDAHNVPCWVASNKQEYSAKTI  
RNKINSKLPEFLKEFPLMAKHPHCASKPAKPVDWERARSSLEVQSVKAVSWARPGSVAGLAVLESFIDQRLQ  
YFDSLRRNNPNSDALSNLSPWLHFGHVSAQRVVLEVERSGQRWPSSVKAFFEETVVRRELADNFCFYNNKYDCV

EGAYEWAQKTLRDHAEDPRPYLYTRDELEAAKTHDKLWNAAQFQMVSEGMHGFRLMYWAKKILEWTSSPHEA  
LAIAIYLNDRYELDGRDPSPGYVEVGFDRLVQVIGEQRGEGVKMAARCFWDADTDSYAQDIYMNDSLFCV  
AAVFGCFHY

>Amia\_calv\_\_MBN3300458.1

MPHSCIHWFRKGLRLHDNPALLASLKDCALRPIFILDWPFPKTMQVGINRWRFLIGALKDLDSSLRKLNSRL  
FVVRGTPAEVFPRLFKQWKVTRLTFEIDTEPYAQORDAQVLSLAEHGVVEVIQKISHTLYDTERIIVENNGKA  
PLTYNRLQALLKTLGGPKRPVPRPTLEDMGKTCTPFSEQHDEEFGVPTLEELGQDPQKAGPELYPGGEALR  
RLEQHMERVSWVCNFQKPEPNTLNPSTTVLSPYVKFGCLSARTFWWRITDVYHGKHSQPPVSLHGQLLWR  
EFFYTAGMGIPNFDMEGNPVCVQVDWDSNQEHAAWREGRTGFPFIDAIMTQLRLEGWIHHLARHAVACFLT  
RGDLWISWEEGQKVFEELLLDADWALNAGNWQWLSASAFFHQYFRVYSPIAFGKKTDKNGDYIRKYLPLVKKF  
PVQYIYEPWKAQRSIQERAGCIVGKDYPRPIVEHDTASKKNLQRMKLAYARRSGTSEEPESKKGEPGTAQSS  
NWDQSFIILVQSIPSSSYVTYFQLLFHPLSLLLKYNPWATH

>Amia\_calv\_\_MBN3301867.1

MVVNTVHWFRKGLRLHDNPSSLRESIQGADTVRCVYIILDPWFAGSSNVGINRWRFLQCLELDASLRKLNSRL  
FVIRGQPADVFPRLFKAWNINRLSFEYDSEFPFGERDAAIKKLASEAEVEVIVRISHTLYDLEKIIEINNGQP  
PLTYKRFQTLISRMDFLETPVEPITPEVMGKCTTPLSDHDEKFGVPTLEELGFDTEGLPSAVWPGGETEALT  
RLERHLERKAWVANFERPRMNANSLASPTGLSPYLRFGCLSCHLFYFKLTDLYKKVKNSSPPLSLYGQLLW  
REFFYTATNNPRFDKMEGNQICVQIPWDKNPEALAKWAEGRGTFPWIDAIMTQLRQEGWIHHLARHAVACFL  
TRGDLWISWEEGMKVFEELLLDADWSVNAGSMMWLSCSSFFQQFFHCYCPVGFGRRTDPNGDYIRRYLPVLRG  
FPAKYIYDPWNAPEVQKVAKCVIGVHYPKPMVNHAEEASRLNIERMKQIYQQLSCYRGLGLLASVPSNPTGSG  
NGGMVGFSSGEGMHASHTPTGEYSLPFFFFM

>Amia\_calv\_\_MBN3303224.1

VLHWAQRNAEHIVPLYCFDPRHYLGTHCYNFPKTGPFRLRFLLESVKDLRETLOKKGRNLLVRKGKPEDVVG  
LIKQLGSVSAAVAFHEEATKEEQDVEKALKQVCSQFKVKVHTCWGSTLYHREDLPFNPIARLPDVTYQFRKAVE  
TRSRVRPTITMPECLKPLPLGLEAGSIPSPEDLGQTDCLSDPRTAFPCSGGETQALARLKYYFWDNLVASYK  
ESRNLIGMDYSTKFAPWLALGCISPRYIYEQIKKYENERTANQSTYWVIFELLWRDYFRFVAVKYGNRIFYL  
KGLQQKSVPWKKDSKLFDAWKEGRTGVPFVDANMRELALTGFMSNRGRQNVASFLTDLGLDWRMGAEWFEYL  
LVDFDVC SNYGNWLYSAGIGNDPRENKRFNMIKQGLDYDNSGDYVRLWVLELRGIKEGDVHTPWTLSAALAH  
AEVSLDGTYPSPIVTAPAWSRHRVNRKPVSPLDPLSLRSKGALEFTAWVSLILLQDWCFSVQGHVGLPL  
GL

>Amia\_calv\_\_MBN3303333.1

MTHRTIHLFRKGLRLHDNPALLGALESSAVVYPVFALDRDFLQAGALTGGLRWRFLQSLQDLERSLATLGS  
LYVLQGRYEQVLRDRVRWGVTQVTFDTEVEPYTQOEDCIRALGREMGFGVRSCVAHTLYDLRRIVQANGGE  
PPLTYKKFLHVLALLGDPEKPARQITPEDFQKCHTPTEEGTEQDRVPSLEDLGIADVTEPLWIGGESQGLQRL  
EKHMENQGWVENFAKPRITPNSLLPSTTGLSPYFSTGCLSVRTFYHQLSNIYAQSKNHSPLPVSLQGQVLWRE  
FFYTVASATPNFTKMASNPICLQIDWATKAEALEKWKMAKTGFPWIDAIMTQLRQEGWIHHLARHAVACFLTR  
GDLWISWEEGMKVFEELYLLDADYSVNAGNMMWLSASAFYHQYTRIFCPVRFGRRTDPEGQYLRKYLPLVKNFP  
SKYIYEPWTAPQHVQEEAGCVIGRDYPLPMVDHREASERNLVLMKRVHSEQENTAQLTRDVADNPMEIRMKRA  
YPKHVEETGRADGFLETTGCAKHFFHEGELKSLPCKWPSKAIQVPELSGEVM

>Amia\_calv\_\_MBN3308662.1

MAVNSVHWFRKGLRLHDNAALQEALSGADSVRCVYVLDWPFAGSASVGVNRWRFLLESLEDLDLSLRKLNSRL  
FVVRGQPADVFPRLFKAWNVTTLTFEFDSEFPFGERDAAIVKMAREFGVETIVKNSHTLYSLDRIEINNNNSP  
PLTFKRFQAIVSRLGLPKKPLGTVAEQMDRCRTDISENHDEHYRVPSLEELGFKTHGISPSTWKGGETAALE  
RLHKHLERKAWVANFERPRINAYSIMASPTGLSPYLRFGCISCRLFYNNLELYRQVRKNSSPPLSLFGQLLW  
REFFYTAATNNPKFDQMEGNPICVQIPWDRNPEALAKWAEQGTGYPWIDAIMTQLRQEGWIHHLARHAVACFL  
TRGDLWISWESGMRVFEELLLDADFSVNAGSMMWLSCSAFAFFQQFFHCYCPRVHTFKCAPFPFPRRYIPKLKEYP  
NRYIYEPWNAPEAVQKAANCIIGVDYPKPMVNHAEEASRLNIERIKQIYQQLSHYKGLSKFLPLVNLNLNLQHH  
QHI

>Amphibalanus\_amp\_KAF0290832.1\_cry\_DASH

MSVTDTDLSFFHPKVLHKAHSAELVPLYCFDPRHFASHTHHFGFPKTGAHRARFLLESVRDLRGRLAERGS  
LVVRSGTPETAVPELAAALAGHKLSLVLQKEATDEEVLVERALAERCALGVPVHTVWGATLYHRDDLPAFVN  
KTPDVYTQFRKAVEGGGRVRPPLQMPDRLRPLPDGLDCGPLPAPADLGLPEGESTGEPRTAFFWPGGETSGLA  
RVHHYLTWETDAVATYKETRNLGSEDYSTKFSPLWSLGLCLSPRYIHSEIGRYEKQRTANKSTYVWLFELLWRD  
YFRFVALKYGNRLFHLTGLQNKVPWKNDMEAFNRWKGSLGIDRG

>Amphibalanus\_amp\_KAF0300247.1\_cry-1

MSPPVVIHWFRKGLRLHDNPALLKAVDYATQSGYHLRPVFILDWPFQFTRSGRVGANRWRFLVGALSDLDSSLQL  
LGSRLLVCRGSPETVLPKLIREDVRRITFETDTEPYAVARDARVAQLARELSCAVTSVTSHTLYEPAQVLAA  
NGGKPPPTYQRMVTLVEQLGAPVAAEPAPRSLPPPGQPAHFVSPLAELGVDAEQLGEELYPGGETEGLARL  
ERSLARPDWVCRFEKPKTAPNSLQPSSTTVLSPYVKFGCVSARLFYHRLADVYSRRGNYTRPPVSLHGQLLWRE  
FFYVVGANTPNFDRMEGNAICRQIPWIENEEFLKAWSEGRTGYPWIDAVMTQLRQEGWIHHLARHAVACFLTR

GDLFISWEHGMKVFDELLLDADWSLNAANWMMWLSASAFFHQFFRVYSPVAFGKKTDPNGDYIKKYLPKLRKYP  
SQYIYEPWKAPIATQKAAGCIVGRDYPKPIVDHDKVRPRNIEWMAAAYKKGKAAHPAPAAGLGADSQDGKGHS  
G

>Amphibalanus\_amp\_KAF0301665.1\_cry-1

MTRPNTVCTGFRKGLRLHDNASLLEGVAGSTTFRCIYILDPWFAGSSNVGINKWRFLQCLEDLDKSLQRLNS  
RLFVIRGQPADVLPSLFKKWNITCLSFGEDEPFPGKVRDQNVKMALEHNVEVISRTCHTLYDVTVIERAGG  
RSPLTYKQFQTVLLSMPPPPAPLHALNHDRFDTESAHKGVWHGGETEALVRLERHMERKAWIASFGRPKMTPQ  
SLKASVTGVSPYLRFGALSPRLFYRDLAYLYRKVSSLSPLRFYRDLAYLYRKVSSLSPLRFYRDLAYLYRKSV  
SWLFYRDLAYLYRKVSSLSPLRFYRDLAYLYRKIKHADPPLSLHGQLLWREFFFYVAATNNPNFDRMVGNPICV  
QIPWDKNPKALAKWASGQTGF PWIDAIMTQLRQEGWIHHLARHAVACFLTRGYLWLSWEEGMQVFEELLLDAD  
WSVNAGTWMMWLSCSSFFQQFFHCYSPVRFGRKVDPEGDYIRTYLPVLKGMPSRYIHEPWLPKSVQKAAKCIV  
GEDYPLPMVCHTDASRINVERMRQIYSRLLGYKGHGKELMGERRAARRVLLLPCCKGKITMLAC

>Amphibalanus\_amp\_KAF0313106.1\_cry-1

MKEAVGVHWFHRLHLDNPALCQLLETCKVYLI FIFDGESGGMRLSGYNRLAFLLES LTDLDRQLRLRGGR  
LLTIRGKPTDALQLMRTEYGMTHLSFEQASGEGGDCEPVWAPRDELVRACDEHAVEI IERISHTLWDPAEVI  
EANGGEPPLTFMSFHQVAMSIGLPPTPEGDPVFRAGQLAVADPTRPHGHPVQASAPDCSVYRLTEFSNLTPLP  
FQLFDEVPPVSELSDLKPSPGEHKKRYQGGETRGLQLLAERVAWEELALSRGIVMPNQYCPDLLGPPRSM SAY  
LRHGCISVRRMYHQIQKAFQACTDAQGHSL SICVLVWREYFYTMSVKNPYDQMEPNPICLNINWRTDDQQL  
QQWKEGQTGYPFIDAAMRQLIQEGWIHHVARNATSCFLTRGDLWLNWVDGLRVFQ EYLLDADWSVNAGNMMWV  
SSSAFENFLDTSDTISPVNYGRMFEPTEGEYIRRYVPELRQMPTEYIFSPWEAPLSVQREAGCIIGKDYPCRMV  
NHEVVSRRNRKLSKIAEQLGTCPPHCOMPAGDAEVKHFFGLPGASLEDMLGGH

>Amphibalanus\_amp\_XP\_043225499.1

MAEPASKKQKKDDSLSQSQSIHQVVEERRKEFGKPGWKFNKKRVKVLTAEEIPDKAKSVVYWMSRDQRVQDNW  
AFLFAQKLALKFKLPLHVCFCFLVPKFLDATIRHYGFMMKGLQEVEKECSQLGINFHLLVGPASNTLVQFAKDH  
QTGAVVTD FSPLRVPRQWLDEVIKALPKDVSVCQVDAHNVPVCWVASEKQEYGARTIRRKIMDRLPEYLTEFP  
AVVRHPPHPAQQAVKPVDWAAAEASLQVDRSVTEVQWARPGTAAALSQ LSEFCSGRLRLFADKRNDPTVAALSN  
LSPWLHFGQLSAQRAVLEVRRLRSRHSKAVEAFVEEAVVRRELADNFCFYQPHYDSVQ GAYGWAAETLKVHSK  
DKREYLYSREQLAEQTHDDLWNAAQQLVLKEGKMHGFLRMYWAKKVLEWTRSP EEALATAIYLNDRFSLDGR  
DPNGYVGCMMWSICGIHDQGWAERPVGKIRYMNYQGCKRKFNVD AFVARYGGKKHKYVPPKE

>Amphimedon\_que\_XP\_003386569.1\_cry-2-like

MDSYSNGFYEEEEERTLT VFNNDGASEEEQDSFFDSYSASASSSPSSLCSSNWHSERLPVSLHWFRSFSRLRH  
DNSALMASLLRPQTQFRAVFVLDPWFTETDKKFGANRLKFLLECLHDLSNQLEALGLKLYVAQGQTAVLAGL  
CQEWGVTHLSYQKSQEP RSKVEERTISEMASMMNIEVEEFHNHTLYSPTELIKLNEGKPILTFKDFRTLLSKL  
KPPAVPISSPSTKQKY NEDNIPMFKVQTFQIPSLASLGCYDELGTGPWVGGETEALKRLDNYCTVRSKPF DN  
FLDCLFDKTSLSPYVRFGCLSVRHFVHYVRQLASTDKSKMTLVQEVSSKLLQREFYFLVSSQVPNFDTDTQNP  
ICIQLPWEFDADGLRRWRSGMTGYPWIDAAIRQMLKEGWIHNLRESIATFLTRGDLWISWLKGAESFEMYML  
DYEPSVSCGCMWKSSSTAFITGTIEHYNPISYGOQLDPNGDYIRHFVPEVKNL PKEYIFCPWMAPIEVQREAG  
CIVGTDYPHPVVDHMTAGVICMERLKSFMQSLSSHQTNP

>Amphimedon\_que\_XP\_003388746.2\_photolyase

MAAGSQAAGAARGAALQESLLIAGSSFNMKRCRLITKPTAGKSSIVKGPVLYWMSRDQRVQDNWGLVYSQELA  
NKHGVPLLVAF TLVPKFLDATWRQYSFMMSGLQEVEKELLKLPFHLLLGKAQSCLP SFIAKESVSVVVCDF  
SPLRVPLGWVKETGAELDKIKVPLVQVDAHNIVPVWLASDKQEYAARTIRNKIHKFLPEFLTEFPVTVHTHN  
SKLTMKSTNWI KARESLEVDMTVSEVSWATPGTNAGLKVLDDFCTKRLKFFAAQRNDPNKDSLNSLPWYHFG  
QVGVQRAILKVKSYS SKHSESVSAYIEEAVVRRELADNFCYYNPHYDSISGAAQWAQDTLKAHKKDKREYIYT  
QEQFESSSTHDPLWNAAQ LQMVQEGKMHGFLRMYWAKKILEWTSSPEEGLRIAIYLN DKYEIDGRDPNGYVGC  
MWSICGIHDQGWAERSVFGKIRYMNYQGCKRKFDVQGQFERKYNNKKRKL DKDELPAAFKKFKKQK

>Amphiprion\_ocel\_\_XP\_023118164.1

MVVNTIHWFRKGLRLHDNP SLRDSIRGADTLRCIYILDPWFAGSSNVGINRWRFL LHCLIEDLDASLRKINSRL  
FVIRGQPTDVFPRLFKEWQITHLSYEYDSEPFPGKERDAAIQKLASEAGVEVMVRISHTLYNLDNI IELNGGQP  
PLTYKRFQGLINRMDAVERLPAETITSDVVKNCLTPISEDHDDKFGVPSLEELGFETEGLT TAVWPGGETEALM  
RLERHLERKAWVANCFERPMNANSLASPTGLSPYLRFGCLSCRLFYFKLTDLYRKVKKNSSPPLSLYGQLLW  
REFFYTTATNPNPCFDMEGNPMCVQIPWDRNPEALAKWAEGR TGFPWIDAIMTQLRQEGWIHHLARHAVACFL  
TRGDLWIRWEEGMKVFEELLLDADWSVNAGSMMWLSCSSFFQQFFHCYCPVGFGRRTDPNGDYIRRYLPILRG  
FPAKYIYDPWNAPEEVQKAAKCMVG IHPKPMVNHAESRINIERMKQIYQQLSCYRGLGLLATVPANPN SGA  
NGSNTGTNQGAGRSS EDPQLQEGTSRTERGQSMQKRRREETPP ESSSSKSWKQSK

>Amphiprion\_ocel\_\_XP\_023122072.1

MSTSRTVICLLRNDRLHDN EFLHWAQRNAEYIVPLYCFDPRHYVGTYNYNLPKTGPFR LRFLLSESIRD LRNT  
LLNKGSNLVVRGKPEEVVADLIKQLG SVSSVAFHEEVTSEELNVEKKVKEVCAKMKVRVHTCWGSTLYHRDD  
LPFNHMSRLPDVYTQFRKAVEAQSRVRPVFSPDKLNPLPSGLEEGAIPSAEDLQQTEAVNDPRS AFPCSGGE  
SHALARLKH YFWD TDAVATYKETRNGLIGVDYSTKFAPW LAMGCISPRYIYDQIKQYESKRTANQSTYWVIFE

LLWRDYFKFVAVKYGNRMFQLKGLQDKSVPWKKDMKLFNAWKEGRTGVPFVDANMRELAMTGFMSNRGRQNVASFLT  
KDLGLDWRMGAEWFEYLLVDHVC SNYGNWLYSAGIGNDPRENRFNM IKQGLDYGNGDYVRQWVPELQAVRGGDVHT  
PWTLSSTAALSHAQVSLGDTYPTPIVIAPEWSRHANKKPTGMGPSPRGKKGPSHTPKQHRDRGIDFYFSKSKNL

>Amhiprion\_ocel\_\_XP\_023146997.1

MPPPAADGQTEVRKMLREVLVGREDPEGFFAMCVSILGHRETRTVFPSLIQPLSTANRALHSILISIIYQEYFT  
KTEDDELELVLALS LLEMKDQQPSVPSQECQLLQQPGDRHNQSSSVQLSSGSKSQGSSYTQLADVPGTRKNTD  
SAQTGPWRKESPPQTTKETELLKSIQLDKRKKQTPGTGQPVSRQD TVRADDEMMGEEDLNQSEKPKRSKNRRQ  
RRKGAGQQLLGLPGSPSAPPPVLLWFRDLRLCDNPALMGSLVGA PVI PVFIWSPEEEEEPGITVAMGGACK  
YWLHQALSCFCSSLERIGSHLVFLKANREGNEVGSSSLQTLKELVKETGARTVL ANALYEPWLKERDDAVVSAL  
QKEGVECRVFHSYCLRDPYSVSTEGVGLRGIGSVSHFMSCKQNPSS TLGVPLDPVSLPTPSHWPQGAPLDT  
LGLARMPRRKDGTTIDWAANIRTSWDFSEEGA HARLDAFLHDGVYRYEKESGRADAPNTSSLSPYLHFGQLSP  
RWLLWDAKGARCRPPKFQRKLAWRDLAYWQLTLFPDLPWESLRPPYKALRWSSDRSHLKA WQRGKTGYPLVDA  
AMRQLWLTGWMNNYMRHVVASFLIAYLHLPWQEGYRWFQDTLVDADVAIDAMMWQNGGMCGLDHNFMHPTD  
AAMTCDPYGSYVRKWCP ELADIPDELIHKPWKCPASMLRRAGVVFVGQTYPERIITDLEGRRNQSLQDVALVRR  
EFGQYVDKRS GCDLVPLPPRLVSEALGLSHMGGA VVKEGKEFLLPVI TRMEFKHQLEDPDADAASNPYNAVLK  
GYVSRKRDETI AFLNERDFTASVMYEGAQR RRERLES DYRRMEGLPLLPSPRGRVRRTP TAKDRFSIVPGGAVT  
SLK

>Amhiprion\_ocel\_\_XP\_023150648.1

MLHCVCRSSSRISL LLIHSNR RPITVVFSTDSFTSETTMSDKKRKATSAAAAKEPSAKQPKLAPVKA EKKAAG  
WLQSLVQQQRSEKNDMKFNKKRLRFISDAVKIKQSGEVLYWMLRDNRVQDNWALIHAQRLAMKENLPLHVCF  
CLVVPKSQLSTLRHFSFMLKGLEEVAKECKHLDIQFHLLHGAPGEVLPGFVSDRSFGAVVTDFSP LREPLQWL  
KDVKKRLPKEIPLMQVDAHNIVPCWEASPKLEYAARTIRGKITKVLSDFLTDFPLVEKH PHTATRTAKPVDWD  
KTLASLSVDRAGETEWAKPGTKAGMAMLESFIDVRLKLFDTQRNDPNAAALSQ LSPWIRFGHISAQRVALQV  
QRSGRTAGVSVASFIEELVVRRELTDNFCFYNEKYDSVEGAYEWAQKTLKDHA KDKRPYLYTKEQLEKAKTHD  
KLWNAAQYQMVSEGKMHGFLRMYWAKKILEWTS SPEEALSITLYLNDRYELDGDQDPNGFVGCMWSICGIHDQG  
WGERPIFGKIRYMNYKGCLRKFNVAQFEKKYCPKNL

>Amhiprion\_ocel\_\_XP\_023151758.1

MVVNSVHWRKCLRLHDNPALQEALNGADTVRCVYILDPWFAGAANVGINRWRFLLEALEDLDNSLKKLNSRL  
FVVRGQPTVEVFPRLFKEWNVTRLTFEYDPEPYGKERDGA I IKMAQEF GVEAVIRNSHTLYNL DRI IEMNNNSP  
PLTFKRQFQTIVSRLELPRRPLPPITRQQMDKCHTQIGENHDLLYSIPSLEELGFRTE DLSPAVWRGGESEALD  
RLNKHLDKKVWVANLEHPRVNTCSLYASPTGLSPYLRFGCLSCRVLYYNLRELYMKLRKRCSPPLSLFGQLLW  
REFFYTAA TNNPNFDRMEGNPICVQIPWDQNPEALAKWAEGR TGFPWIDAIMTQLRQEGWIHHLARHAVACFL  
TRGDLWISWESGMKVFEELLLDADWSVNAGSWMWLSCSAFFQQFFHCYCPVGFGRRTPSGDYIRRYIPI LKD  
YPNRYIYEPWNAPE SLQKAANC VVGVDY PKPMINHAEGSR LNIERMKQVYQQLSHYRGLSLLASVPTIQEEAE  
PPMTDESQTSSGPDSPPRDAADGEAAGCSVAPDSSTVCSFSVPPPDLEDRPPCTSSLPRLPSPRSKPSSPSSST  
SSPSPSPASVAQRRKGIARKARRSQRRGRPSCPPAARGEEMGEERMEEEEEQLEEKMEEEEKMEEEEEATGQ  
QQ

>Amhiprion\_ocel\_\_XP\_023153353.1

MAHTCIHWRKGLRLHDNPALMAALRDCKELYPVFILDPHLHNNSCVGINRWRFLIGALKDLD CSLRKLNSRL  
FVVRGRPQDVFPKLFQKWNVT KLTYEYDTEPYSLSRDKKVT ELAKEH GIEVIYKISHTLYDIERI I EENNGKT  
PLTYNRLQAI VKGLGSPKRPI PAPT MENMKDVKTPCSEKQEK KYGIPTLEELGHDTTSLGEDLFP GGEREALR  
RLEE HMKRTGWVCGFEKPQTS PNSLSPSTTVLSPYVTFGCL SARTFWWRLADVYQ GKHSAPPVSLHGQLLWR  
EFFYTASVGIPNFNMEGNHVCTQVDWDTNPEYLA AWREARTGFPFIDAIMTQLRQEGWIHHLARHAVACFLT  
RGDLWINWEEGQKVFEELLLDGDWALNAGNWQWLSASTFFHQFFRVYSPVAFGKKT DKN GDYI KKYLP HLKKF  
PAQYIYEPWKAPHSIQQAAGCIVGKDYPRPIVEHEVISKKNIQRMKMAYAKRSPDTTESPSKKEGAKRKAPSV  
VDMLKKKSRTN

>Anabarilius\_grah\_\_ROJ13861.1

MSSLFSTCLYIRYSRRALLRAISDPNTILLHYNSMSANKRSLKRQKES PSSAGGKQPKLTAERG RESGWLLK  
EVT ELRKAEQGC EFNKKRLRYLSSSQIKQSGDGVLYWMSRDQRVQDNWALIYAQQLALAEK LPLHICFCLVP  
RYLDAAYRQYAFMLKGLQEVATECKSLGIQFHLLSGEPEQNLPSFVKNWNFGAVVTDFNPLRIPLQW IETVKK  
HLPSDIPFVQVDAHN NVPCWEASEKLEYGARTIRGKITKLLPEFLSEIPLVDTHPHSASKTAKPVNWEKLLSS  
LEVDRSVGEVEWAQPGTSAGMAMLESFIDQRLRFFATLRNPNSDALSHLSPWLHTGQLSAQRVVRQVKREKN  
ASESVASFTEELVVRRELADNFCFYNHNYDDISGAYD WAKKTLQDHAKDTRQYLYTQE QLENAKTHDQLWNAA  
QRQLLSEGKMHGFLRMYWAKKILEWTASPEEALSIAIYLNDRLSLDGD CPNGYVGC MWSVCGIHDQGWAERP I  
FGKIRYMNYAGCKRKFDVAQFERKYAAIKEISKKDTKKS L

>Anabarilius\_grah\_\_ROK23383.1

MSASRTVICLLRNDLR LHDNEVFHWAQRNAEHIIPLYCFDPRHYQGTHHFNFPK TGPFRLLHFLLD SVKDLRAT  
LKKRGSTLVVRQ GKPEEIVGD LKQLDSVTAVAFHEEVASEEKTVEKKLKDICCQNKVKVQTFWGSTLYHRDD  
LPFGHIGRLPDVYTQFRKVVEGQDRVRPVLSTPEQVKS LPLGLEEGPIPTFEGLGQTESVMDCRS AFPCRGGE

TEALARLKHYFWDTNAVATYKETRNGMIGVDYSTKFSFWLAFGCISPRYIYEQIKKYEARTANQSTYWVIFE  
LLWRDYFKFVGLKYGNRI FHINEGRTGVFPVDANMRELALTGFMSNRGRQNVASF LTKDLGLDWRLGAEWFEY  
LLVDHDVCSNYGNWLYSAGIGNDPRENRFNMIKQGLDYDNNGDYVRQWVPELGGIKGGDVHTPWTLSNSALS  
HAKVSLNETYPSPIVIAPEWSRHVNKSAGPSSAKGRKGSSYTPRQRKDRGIDFYFSKKKS F

>Anabarilius\_grah\_\_ROL43371.1

MVVNTIHWFRKGLRLHDNP SLRDSI IGADTLRCVYILDPWFAGSSNVGISRWRFL LQCLEDLDASLRKLNSRL  
FVIRGQPTDVF PRLFKWKITRLSYEYDSEPF GKDRDAAIKKLATEAGVEVVVRISHTLYDLDKI IELNGGQS  
PLTYKRFQTLISRMDPVEI PAETITAEVMGKCTTPVSEDHDDKFGVPSLEELGFETEGLSSAVWPGGETEALT  
RLERHLERKAWVANFERPRMNANSL LASPTGLSPYLRFGCLSCRLFYFKLTDLYRKVKKNSVPPLSLYGQLLW  
REFFYTAATNNPHFDKMEFNPI CVQIPWDRNPEALAKWAEGQTGF PWIDAIMTQLRQEGWIHHLARHAVACFL  
TRGDLWISWEEGMKVFEELLLDADWSVNAGSWMWLSCSSSFFQQFFHCYCPVSFGRRTPDNGDYIRRYLPILRG  
FPAKFIYDPWNAPDSVQKVAKCIIGVHYPKPMVNHAEASRINIERMKQIYQQLSCYRGLGLLATVPSNTAKNG  
DGNGAAPSSADNTQESTHITVQPSASFQPEFPPTMSCDQQPVNSVQPHPGYSGGMVGVQVYKQSQRGEFCQ  
NGLRGLITDFHIKLF

>Anabarilius\_grah\_\_ROL43523.1

MSHRTIHLFRKGLRLHDNPGLLGALASSAALFPVYVLDHAFLEGAMRLGALRWRFILQSLEDLDGRLRTLGSRL  
LYVLQGSTRAVLSDLVTRWGITQISYDTEVEPYARMEREI QALAEERRLQTHTCVSHTLYDVERI IQANGGS  
PPLTYKKFLHVL SVLGEPEKPARDVSAEDFLRCPTPPDHEQAYGVPSLADLGLLEVQSEVLWPGGETHALQRLD  
KHFQSQGWVASF SKPRTVPNSLLPSTTALSPYLSLGLSVRTFYHRLSSIYAQSKNHS LPPVSLQGQVLWREF  
FYTVASATPNFTKMEGNPICLQIDWYHD PESLEKWRTAQTGFPWIDAIMTQLHQEGWIHHLARHAVACFLTRG  
DLWISWEEGMKVFEELLLDADYSLNAGNWMWLSASAFFH KYTRIFCPVRFGRRTDPQGQYL RKYLPVLKNFPS  
QYIYEPWKAPEDVQLSAGCIIGKDYPCPMVCHMEASQRNLGLMRQVRTEQQKTAELTRDVADDPMEAGLKREL  
QEEEEELLEGAEPCKSKSRFSGSTDQKSRPCSWTPETLRLSEESVNSEVQSRSETYEGGEEHTEPNPSADGGKE  
HPTAPPGMIWRVTGGLVSATKG VVGATVGGVAWLGGKSYEITKSAVTAVPSMGVGLVKGGVSAVAGGVSTVGS  
TVANKVPFTGKKKDKSE

>Anabarilius\_grah\_\_ROL54170.1

MSHNSIHWFRKGLRLHDNPALIAALKDCRHIYPLFL LDPWYTSNTHIGINRWRFLIEALKDL DSSLKKLNSRL  
FVVGSPPT EVL PKLFEKWKITRLTFEVDTEPYSQSRDQEV MKLAKEHGV EVIPKISHTLYNINRI IDENNGKT  
PLTYVRFQSVVKAIGPPKKPVPAPTEEDMKGVSTPFS EDHEDEFEIPSL EDDLGLDTSSLGPDLPFGGEQEALR  
RLDEHMQR TGWVCKFEKPQTSNALIPSTTVLSPYVRFGCMSARTFWWR LTDVYRGKKHSEPPVSLHGLMWR  
EFFYTTAVGIPNFNKMEGNTNCVQVDWENNERLA AWREARTGFPFIDAIMTQLRQEGWIHHLARHAVACFLT  
RGDLWISWEEGQKVFEELLLDADWSLNAGNWQWLSASAFFRQYFRVYSPIAFGKKTDKHGDYIKKYL PVLKKF  
PAEYIYEPWKAPRSIQERAGCIVGKDYPRPIVEHEV VHKQNIQRMKAAYAKRSPEDKPTTKGVKRKATSIVDM  
LEKKSKR

>Anabas\_test\_\_XP\_026217746.1

MVINTIHWFRKGLRLHDNP SLKESLLGADSVRCVYILDPWFAGSSNVGISRWRFL LQSLEDLDSSLRKLNSRL  
FVIRGQPTDVF PRLFKWKITRLSYEYDSEPF GKERDAAIKKLASEAGVEVTVRISHTLYDLDKI IELNGGQS  
PLTYKRFQTLISHMDAVEMPAESITAEIMGKCTPLSEDHDDKFGVPSLEELGF DTEGLSSAVWPGGETEALT  
RLERHLERKAWVANFERPRMNANSL LASPTGLSPYLRFGCLSCRLFYFKLTDLYRKVKKNS SPPLSLYGQLLW  
REFFYTAATNNPCFDKMESNPICVQIPWDRNPEALAKWAEGRTGF PWIDAIMTQLRQEGWIHHLARHAVACFL  
TRGDLWISWEEGMKVFEELLLDADWSVNAGSWMWLSCSSSFFQQFFHCYCPVGFGRRTPDNGDYIRRYLPILRG  
FPAKYIYDPWNAPESVQKAAKCIIGVHYPKPMVHHAEASCLNIERMKQIYQQLSCYRGLGLLATVPSNSSGNG  
NVNSETPSDVMGF PSEATHSAAAASSYVAPSSSMMCYTQGTQQIPAPVVQKGSEHHSTPQTSGKRHSEDSGNG  
KGSKVQRQSSH

>Anabas\_test\_\_XP\_026218962.1

MFCKIVSENVTD AFCSSDPRSRTSDTVSKRNLVL IQIQVLQTSRRGRSMTTSRTLICLLRNDLRVHDNELF  
HWAQKNAEHIVPLYCFDPRHYMGTHNYNLPKTGPFRLRFLLESIRD LNTLLSKGSNLVVRGKPEHVVAELI  
KQLGSVSTVAFHKEVTSEELNVEKKLKDVC DQMKVKVHTCWGSTLYHIDDLPFHHISGLPDVYTQFRKEVETQ  
SRVRPVFPTPEQLKPLPPGLEEGTIPTADDLQQTEPVTDPRS AFPCSGGESQALARLKHYFWD TDAVANYKET  
RNLIGVDYSTKFASWLALGCISPRYIYQ QIKQYEQRTANQSTYWVIFELLWRDYFRFVSVKYGNRIFQVKG  
LQDKSVPWKNDMKLFNAWKEGRTGVFPVDANMRELAMTGFMSNRGRQNVASF LTKDLGLDWRMGAEWFEYLLT  
DYDVC SNYGNWLYSAGVGNDPRENRFNMIKQGLDYDNGDYIRLWVPELQKIRGADVHTPWT LSTAALSHAE  
VSLGENYPTPIVIAPEWSKHINNKP RGTPSPRGKKGPSHTPKQHRDRGIDFYFSRSKNL

>Anabas\_test\_\_XP\_026220618.1

MPLSAAGGGDSEVLVRKILREVLLGREDPEGFFAMCLSVLGHQETR SQFLSLIHPLSTANSS LHSTLTSIYQE  
FFTQTEDDELELALALS LLEMKDDQLSTSSHKTGFLQFGDKQNESRSSQLTSESQPQGSSPTRRAEVVGTQET  
ELQKRPRVKKYEECDQMTSNLAEKSKNRRQR RKAARQQVVG LQCSSLAPPPVLVWFRDR LRLCDNPALSASL  
ELGAPVIPVFIWSPDEEEGPGITLAIRGAGKYWLHQALSHLCASLERIGSHLVFLKASGEENG VGSLSLHSLKK  
LIKDTGARTVL ANALYEPWLKERDDAVVAALQKDGTEVRMFQSYCLRDPYSVSTEGVGLRGIGSVSHFMSCCR  
QNPASPLGVTLDPVSLPTPAHWPQGVSLDTLGLANMPRRKDGTVINWAANIQKSWDFSEEGAQA HLEAFLQD

GVYRYDKESGRADAPNTSCLSPYLHFGQLSPRWVLQAARGARCQPLKFQORKLAWRDLAYWQLTLFPDLPWESV  
RPPYKALQWSSNRGHLKAWQRGLTGYPLVDAAMRQLWLTGWMNNYMRHVVASFLIAYLHLPWQEGYRWFQDTL  
VDADVAIDAMMWQNGGMCGLDHWNFVMHPIDAAMTCDPYGNYVRKWCPELADLPDELIHKPWKCPSSMLRRAG  
VVFQGQTYPERIITDLEERRSQSLQDVARVRREFQQYVDKRTGCDLVPLPPSLVTKALGLSHQDSSVVIIEGKQF  
LLPVITRMEFKYQQENPNADASSNPYNALLKGYVSRKRDETI AFLNERDFTASVMFEAVQRKERLESDHRRIE  
GLPHAPAPRG SARRTPTAKDKFSIVPGGALTSLR

>Anabas\_test\_\_XP\_026221361.1

MAVNSVHWFRKGLRLHDNPALQEALNGAHTVRCVYVLDPWFAAGANVGINRWRFLLEALEDLDKSLKKLNSRL  
FVVRGQPTDVFPRLFKEWKVTRLTFECDPEPYGKERDGAIIKLAQEFGVETIVRNSHTLYNLDRIIEMNNNNP  
PLTFKRQFQTI VSRLELPRRPLL PVTQQQMDKCCTKIADNHDQLYSIPSLEELGFRTEGLPPAVWRGGESEALE  
RLNKHLDKKVWVANFEHSRVNTCSLYASPTGLSPYLRFGCLSCRVLYYNLRELYMKLRKRCSPPLSLFGQLLW  
REFFYTAATNNPNFDRMEGNPICVQIPWDQNPEALAKWAEGRTGFPWIDAIMTQLRQEGWIHHLARHAVACFL  
TRGDLWISWESGMRVFEELLLDADWSVNAGSWMWLSCSAFFQQFFHCYCPVGFGRRTPDPSGDYIRRYIPIIKD  
YPNRYIYEPWNAPDSVQKAANCVVGVDPKPKMINHAEGSRLNIERMKQVYQQLSHYRGLSLLASVPTIQEEAE  
PPMTDESQASSGPDSPHRGPDDSEAAGSSFPADSSTVCAPSSSAPNPDSQEANIHILOQTACTSSGSNSQPTAA  
TTPTSASHLASTAAPLTLAQSPVSRKSPSSSSCPTLSPSPSPAATPTQTSCPGQRRKGLIRKVRRSQRQRG  
RQSCGPPARDGGGRAEEEEGEVEEAEGEERMEEDVEQDEDMEETCGETAGLQQ

>Anabas\_test\_\_XP\_026231066.1

MLFCINRSSSFVSAPGRFLKLIVHSDQWSSPLLSFIFPSGSIMPAKKRRATSAAAAAADEEPSAKQQKLAST  
KEDRAEDRAEDRAEDRAEDRAEDRAEDRAEGLFNKRRLRFISDTEKIKQSGSEGLYWMSRDQVRVDNwaliha  
QQALALEEKLLPLHVCFLFVPKSELSTLRHYSFMLKGLEEVAQECKKLNIQFHLLRGSAGEVLPGFVSDHSLGA  
VVTDFSPLREPLQWLEDVKKKLSKDIPFIQVDAHNI VPCWVASPKLEYGARTIRGKINNLLPEFLSDFPLIEK  
HPYTAIRTAKHVDWDKTLASLQVDRSVGETEWAKPGTKAGMAMLQSFIDARLKLFGTHRNDPNAAALSQSPW  
IRFGHLSAQRAALQVKRHGKSTSQSISASFLEELVVRRELTDFNFCFYNNKKYDSVEGAYEWAQKTLKDHAKDKRS  
YLYTREQLENAKTHDKLWNAAQYQMIIEGKMHGFLRMYWAKKILEWTSSPEEALSIALYLNDRHELDGQDPNG  
FVGCMWSICGIHDQGWAERPVGKIRYMNYKGCTRKFDVAKFEKKYCPKNL

>Anabas\_test\_\_XP\_026234836.1

MAHTCLHWFRKGLRLHDNPALMAALRDCEELYPVFI LDPHLHNKTCVGLNRWRFLIGALTDLDCSLRKLNSRL  
FVVRGKPDDEVFPKLFNKWKITKLTIEYDTEPYSLSRDTEVTALAKEHGEVEIYKISHTLYDINRIIEENNGAA  
PLTYKRLQAIANSLGPPKRP IPPPTLEDMEGVKTPRLEKHEKKYGIPSLLEELGHDTTALTEELFPGGEQEALR  
RLDEHMKRTGWVCSFEKPQTS PNLSPSTTVLSPYVTFGCL SARTFWWRLTDVYQGGKHSHPVSLHGQLLWR  
EFFYTASVGIPNFNKMENPACTQVDWDTNAEYLA AWREARTGFPFIDAIMTQLRREGWIHHLARHAVACFLT  
RGDLWISWEEGQKVFE DLLLDGDWALNAGNWQWLSASTFFHQFFRVYSPVAFGKKT DKN GAYIKKYLPLKKF  
PAEYIYEPWKAPRSIQQAAGCIVGKDYPHPIVQHEVVSKKNIQRMKLAYARRSSDPTESPSKKQGVKRKAPSV  
VDMMLKKKKRKI

>Ananas\_com\_PHR2\_OAY69588.1

MEQTKPLPLPTSPQTLETLETLESQSPSQEEHHVKPLPIASLSLSLSSLLSLASKPSPPTLSSFKTRIKIPS  
QITSLAHLSSSSPKPPRRSSSAAAAGAA SVLRAPSQLLRRPPADPRAGAAAGRRCGLVWFRADLRVHDNEALA  
AASDASLSLLPVYLFDRDYGRSSSGFDRGTGYPRAAFLRDSVADLRRLRLARGSDLVVRIGRPEVVLPELARA  
SGADAVYAHREVSHDEVRAEERVAKAMEKEGVEVKYFWGSTLYHVDDL PFDLDRMPSTYGSFREKVQGVAVRR  
TIEALDQIKGLPKRGGVEPGEIPTLAELGLNPAPAMSQDGKPAAVTSSLVGGETEALERLKKFAAEC SMQPKK  
GDKDSTRDSIYGANFSCKISPWLATGCLSPRFMYEELKKTATKAISAATNQKNGAAGSDNGMNWLMFELLWRD  
FFRFITKKYSTGKNAEVEPATACTGALA

>Ananas\_com\_XP\_020089413.1\_(6-4)DNA\_p

MLFQIPAVRYPSTPSPSSSSSSCSPSPRNPPRRSPRSRMESNAMVWFRKGLRIHDNPALDHARRGGCARLFP  
VFVLDPRYLEPDPTAFSPGSARSGLNRIRFLDLSADLDSALRSLGSRLLLLRGEPAPLICRVLKDWNIGKLC  
FEFDTEPYSLARDKQVSDFASASGIQVFSVSHTLFNPADII EKNGGRAPLTYQSFVALAGKPPEPLSVTYHE  
LPPVGDTEGYQLLSVPKIEELGYGDISQEEFSFPRGGESEALRLKESLKDKEWVAKFEKPKGDPSAFLKPAT  
TLLSPYLKFGCLSSRYFYQCLHDIYKSVGKHTSPPVSLAGQLLWRDFFYTVAFGTPNFDCMRGNKICKQVPWR  
DDEELLVAWREGQTYPWIDAIMIQLKKWGWVHHLARHSVACFLTRGDLFIHWEKGRDVFERLLIDSDWAINN  
GNWLWLSCSSFFYQYYRIYSPISFGKKYDPNGNYIRHFLPVLKDMPNEYIYEPWTAPLSVQKKARCIIGKDYP  
KPVVDHDIASKECRKKMAEAYASNHSGENVPSGRSSNVLRRLQENENREGSPPTNSKQRKKHSL

>Ananas\_com\_XP\_020094540.1\_photolyase

MCPAIPASSPVHPNRIRILSPGPPGPPSAGPVVYWMFRDQRLRDNWALLHAAHLAAAASAPLAVAFALFPGP  
FLLGARARHLLFMLRSLRRLLLSPFPFFLLHSPSHSLPALRRLSASALVADFSPLRPFRSALDHIVRSV  
GADVAVHQVDAHNVVPVWAASDHLEYSARTLRSKIHRLLPEYLVEFPELPAPAI PWTGEKPLEIDWDELFTDI  
NREVGDAPEITWCEPGEDAAMETLLGTNDGFLT KIRIRNYDTRNDPTKPRGLSGLSPYLHFGQISAQRCALEA  
RARRSSNPKA VDAFLEELIVRRELADNFCYYQPKYDSL DGAWEWARKTLMEHAVDKREHIYTREQLEKAQTAD  
PLWNASQLEMVYHGKMHGFM RMYWAKKILEWTNKPEEALSIAIYLN DKYEIDGRDPNGYVGCMWSICGVHDQ  
G WKERPVGKIRYMNYAGCKRKFDVDAYISYVNRLVGETKKRKPENPLSLLKKKHSKSER

>Ananas\_com\_XP\_020095834.1\_cry-1-like

MSTSAKTIVWFRDLRIEDNPALAAASKDACVLPVFWCPSEEGQFYFGRVSRWWLKQSLGHLDDQSLKLLGCP  
LALIRAESTLAALLQCIGAIGATRVVYNHLYDPVSLVRDHKIKNQLAALGVSVQSFNADLLYEPWEVSDENGH  
AFTTFDAFWEKCMNLPIDLASPLPPWKLVPAAAGIENIQSCSIEDLGLENEPEKSSNALLSRGWSPGWNNADKV  
LAEFVEGSLLEYSRNRMKVEGTTTSLSPYLHFGEISVRKIYQTVRMKQINWAKEGNCEAESVSLFLRSIGL  
REYSRYLCFNFPFTHERSLLGNLRHYPWRADENQFKSWRQGRGTGYPLVDAGMRELWATGWVHNRIRVVVASFF  
VKFLLLPLWTWGMKYFWDTLLDADLESIDILGWQYISGSLPDGHELNRIIDSPEVQGGKFDPDGKYVRNWIPELAR  
MPTEWIIHHPWDAPKPVKAAGVELGLNYPNPIIEIDTARERLDDAVSMMWELDRAAKIAALNDSNEVVADNLV  
NINSLDIPKVVVKKEVSCSMSSLDQRPVSVHNLKVSACNYEELKSLSGRGADKQVLDQAPTSTNVEDDLRSTA  
ESSSARKRSISSSTCAVPTASFSTSEANPLKESSGRASMGSSVKEEDEDEDAQSSIKGLRPSKRCG

>Ananas\_com\_XP\_020109087.1\_cry\_DASH,\_

MLHLLSPPHSTPLKSLIFSPVPTPIRFLFRSNLTMSLSSSSIPLSNDRLRPVRRCYMPVGLSSEEAEMASDEAF  
RRYSSPSLKRTGKGVAIVWFRNDLRVLDNEALVRAWATSESVLPVYCVDPNFGTTHYFGFPKTGALRAQFLI  
ECLADLKKNLIKGLNLLVKHKGKPEDILPSVVKAAGVHTVYAHKETCSEELLVEHRVLKRLQQVVLQPSPDQE  
PINPKLQLIWGTTMYHIDDLPFISIRDLDPVYTQFRKAVESKCLTRSCCKLPLSFPPPSASLDEIGGWGDI  
LEQLGLEEKCKDKGMSFVGGENAAIGRVTEYFWKKDKLRVYKETRNGMLGPDYSTKFSSWLASGSLSPRYIYE  
EVKRYEKQRISNDSTYVWLFELIWRDYFRFLSIKYGNSIFHLGGPRKIVSNWSQDRALFEAWRDGRTGYPIID  
ANMKELSTTGFMNSNRGRQIVCSFLVRDMGIDWRMGAEWFEETCLLDYDPASNYGNWYTYGAGVGNDPREDRYFSI  
PKQAKTYDPEGEYVAYWLPPELRSLPKERNFPGNSYTKQIVPLKFDTTYQKKDYSKRERADKMYVR

>Anas\_plat\_\_EOB07201.1

RFLQLCEDLDANLRKLNRLFVIRGQPADVFPRLFKEWNIAKLSIEYDSEPFGKERDAAIKKLASEAGVEVI  
VRISHTLYDLDKIIEELNGGQPLTYKRFQTLISRMEPLEMPVETITPEVMEKCTTPVSDDHDEKYGVPSLEEL  
GFDTDGLPSAVWPGGETEALTRLERHLERKAWVANFERPRMNANSLASPTGLSPYLRFGCLSCRLFYFKLTD  
LYKKVKKNSSPPLSLYGQLLWREFFYTAATNNPRFDKMEGNPICVQIPWDKNPEALAKWAEGRTGFPWIDAIM  
TQLRQEGWIIHHLARHAVACFLTRGDLWISWEEGMKVFEELLLDADWSVNAGSWMWLSCSSFFQQFFHCYCPVG  
FGRRTDPNGDIIRRYLPVLRGFPKAYIYDPWNAPEISQKAAKCIIGVNYPKPMVNHAEASRLNIERMKQIYQQ  
LSRYRGLGLLATVPSNPNGNGSGGLMGFSPPGESVSGCGSTGGAQLGTGDSQTVGVQTCALGDSHAGTSGIQQQ  
GYCQASSILHYAHGDNQQSHLLQAGRTSLGTGISAGKRPNPEEETQSVGPKVQRQSTN

>Anas\_plat\_\_XP\_027300846.1

MPHRTIHLFRKGLRLHDHPALLAALESSEVVYPVYILDRKFMTSVMHIGALRWHFLLQSLEDLQKNLCRLGSH  
LLVIQGEYEPVLRDHVQKWNITQVTLDAEMEPFYKEMEANIRCLGEELGFEVLSVVGHSLYDTKRILDNDGT  
PPLTYKRFLHILSLLDPEVPVRNLTAEDFQRCRPPDLDLAECYRVPLPADLKIPPEISIPWRGGETEGLQRL  
EQHLADQGWVASFTKPRITPNSLLPSTTGLSPYFSMGCVSVRTFFYRLSNIYAQAKHHSLLPPVSLQGQLLWRE  
FFYTVASATPNFTKMAGNPICLQISWYEDAERLHKWKTAQTGFPPWIDAIMTQLRQEGWIIHHLARHAAACFLTR  
GDLWISWEEGMKVFEELLLDADYSINAGNMMWLSASAFFHQYTRIFCPVRFGKRTDPEGQYIRKYLPLVKNFP  
SKYIYEPWTASEEEQKQAGCIIGKDYPFPMVDHKEASNHNQLMKHVREEQYRTAQLTRDDTDDPMEMKLKRD  
HSEENVTKAKTARMTEQT

>Anas\_plat\_\_XP\_027306164.2

MAGLQTESLQAIIFERYITGAGLKGGPWRGLAVCLLRCDLRAHDNQVLHWAASNADYLIPLYCFDPRHYAGTHC  
YGFPKTGPHRLRFLLESVKDLRETLLKKGSTLVVRKGPEDVVRDLITQLGCVGVVAFHEEATQEELDVEKEL  
CQVCEQHGVVEKPFWAATLYHRDDLPGPIARLPDVYTQFRKAVEAEAKVRPALQLPDQLKPLAPGVEEGCIP  
TMEDLGQKDPGTDPRTAFFPCRGETQALARLQYFWDTNLVASYKETRNLIGMDYSTKFAPWLALGCISPRY  
IYEQLRKYEKERGANDSTYVWLFELLWRDYFRFVALKHGRRIFSVRGLQSKEVPWKKDLQLFDCWKEGKTGVP  
FVDANMRELAATGFMSNRGRQNVASFLTCKDLGLDWRMGAEWFEHLLVDYDVC SNYGNWLYSAGVGNDRPRDKRK  
FNVIKQGLDYDGNDFVRLWLPELRGIAGADAHAPWALSSAALRQAGVILGQTYPQPLVRAPEWSRHINQRLQ  
GRSPHPRGRRGPADAPAQRKDRGIDFYFSRKKDE

>Anas\_plat\_\_XP\_027313887.2

MAAAVAAPSRSVHWFRRLRLHDNPALQEALRGAASLRICIYILDPWF AASSAVGINRWRFLQSLLEDLDNSLR  
KLNSRLFVVRGQPTDVFPRLFKEWGVTRLTTFEYDSEPFGKERDAAIVKLAKEAGVEVVIENSHTLYDLDRIE  
LNGNKPPLTYKRFQAIISRMELPKKPVSSVT SQOMETCKVDIQENHDDVYGVP SLEELGFPT EGLAPAVWQGG  
ETEALARLDKHLERKAWVANIERPRMNANSLASPTGLSPYLRFGCLSCRLFYRLWELYKKVKRNSTPPLSL  
YGQLLWREFFYTAATNNPKFDRMEGNPICIIPWDKNPEALAKWAEGKTGFPWIDAIMTQLRQEGWIIHHLARH  
AVACFLTRGDLWISWESGVRVFEELLLDADFSVNAGSWMWLSCSAFFQQFFHCYCPVGFRRTDPSGDYVKRY  
LPKLKGFPPARYIYEPWNAPESVQKAAKCIIGVDYKPKPMVNHAEASRLNIERMKQIYQQLSRYRGLCLLASVPS  
CVEDLSGPVADSASGQSSTSTAVRLPQSDQASPKRKHEGAEEELCTEELYKRAKVTGLPASEIPGKSL

>Anas\_plat\_\_XP\_027319951.2

MSRDQRVQDNWAFLYAQRLALKQELPLRVCFCLVPKFLGATIRHYGFMLRGLQEVSKECTELNIPFHLLGYA  
KDVLPFPVQVQGVGGLVTDFCPLRVPRQWVEDVRERLPEDVPFVQVDAHNIVPCWVTSPKQEYSARTIRGKI  
HSQLPEFLTEFPVVRHPHPSPCPAEPIAWDACYSYLQVDRSVAEVEWATPGTSAGLAVLQSFIAERLKSFSSTQ  
RNDPNKAALSNLSPWFHFQVSTQRAILEVQKHRAHKE SVEAFVEEAVVRRELADNFCYNNENYDSLQGAYD

WAQTTLRLHAKDKRPFLYELQQLEQATTHDPLWNAAQLQMVREGKMHGFLRMYWAKKILEWTRSPEEALQFAI  
YLNDRYELDGRDPNGYVGCLWSICGIHDQGWKERDVF GKIRYMNYSGCKRKFDVDQFERRYGPRLAQ  
>Anguilla\_anguilla\_XP\_035274077.1\_cryptochro  
MVVNSVHWFRKGLRLHDNP SLQEALNGADTVRCVYILDPWFAGSANVG VNKWRFLLESLEDLDTSLRKLDSRL  
FVVRGQPAEVFPRLFKENVT RLTFEYDSEPYGKERDAAI IKMAQEFGVETRVQNSHTLYNLDR IELNNNSP  
PLTFKRFQAI VNRGLPKRPLTTVT KQQLDSCRTSISDNHNER YGVPSLEELGFKTHGLSPAVWKGGETEAL E  
RLSKHLDRKAWVANFERLRINICSLIASPTGLSPYLRFGCLSCRLFYIDLRELYMKVRKHSTPPLSLFGQLLW  
REFFYTAATNNPNFDRMEGNPICVQIPWDHNPEALAKWAEGR TGYPWIDAIMTQLRQEGWIHHLARHAVACFL  
TRGDLWLSWESGMRVFDELLLDADYSVNAGSMMWLSCSAFFQQFFHCYCPVGFGRRTDP SGDIIRRYIPQLKD  
YPNRYIYEPWKAPETVQKAANC VVGKDYPKPMINHAEGSRLNIERMKQIYQQLSHYKGLSLLASVPSIQEEAE  
PPMTDDSKAHSSSTSDDCHV  
>Anguilla\_ang\_XP\_035242993.1\_cry\_circad  
MTHRTIHLFRKGLRLHDNP SLVAALESSAAVYPVFLDRAFLEGATRMGPLRWRFL LQSLRDRLDGLAALGSR  
LHVLQGGHEAVLRLVR RWGVTQLTFDAEVEPFYARLDDGLRALCQELGVLVRSCVAHTLYDVRRI IKANGGE  
PPLTYKKFLQVLSVLGEPDKPAREITLQDFQKCKTPVDDGNDEQYRIPSLEDLGIEVDLEVLWPGGESEGLKR  
LEKHFESQGWVNF SKPRTIPNSLLPSTTGLSPYFSLGCLSVRSFYKLSNVYAQSKNHS LPPVSLQGQLLWR  
EFFYTVA SATPNFTKMAGNPICLQIGWYEDQA ALEKWRTAQ TGFPWIDAIMTQLRQEGWIHHLARHAVACFLT  
RGDLWISWEEGMKVFEELLLDADYCVNAGNMMWLSASAFFHQYTRIFCPVRFGRRTD TDGQYLRKYL PVLKNF  
PSKYIYEPWTAPLEVQQEAGCIIGKDYPQPMVNHQEVSQRNMALMRQLRSEQEGTAQLTRDVTDDPMESGVKR  
DRQDNGPSEDASEKLERANKRFS PDGDCKAQSVSWTS DPIRLPELSEGVM  
>Anguilla\_ang\_XP\_035243646.1\_cry-1-like  
MAPNSIHWFRKGLRLHDNPALREAVRGAGTVRCVYFLDPWFAGSSNLGVNRWRFL LQCLEDLDASLRKLNSRL  
FVIRGQPANVFPRLFKWKISRLTFEYDSEPF GKERDAAIRKLAMEAGVEVIVKTSHTLYDLDKI IELNGAQ  
PLTYKRFQTLVSRMDPPEMPVEPLSEAFMGRCTTPVGDDHGD KYGVPSLEELGFDTEGLASAVWPGGETEALT  
RIERHLERKAWVANFERPRMNANSL LASPTGLSPYLRFGCLSCRLFYFKLTDLYRKVKKNSSPPLSLYGQLLW  
REFFYTAATNNPRFDKMEGNPICVRIPWDWNAEALAKWAEAKTGFPWIDAIMTQLRQEGWIHHLARHTVACFL  
TRGDLWISWEEGMKVFEELLLDADWSVNAGSMMWLSCSSSFFQQFFHCYCPVGFGRRTDPNGDFIRRYLPVLRG  
FPAKYIYDPWNAPHSVQTA AKCIIGIHYPKPMVNHA EASRLNIERMKQIYQQLSRYRGLGLLASVPSNHNGNG  
NGGSGGGGNGAMMAYSPGEQPQGN SAAHGYHTVSDPGQAIASHRLYQASSSHEFAVPQH PGRLSHVTGKRER  
EAEREAGGSDSTPSSALKVQRPNSEKRELQDVNLAPY  
>Anguilla\_ang\_XP\_035278411.1\_photolyase  
MRNYECEIMDQFCAGLNISCRQYQRQTSNPDRRSLLYPVCGGLPQRVSPARPNRAPRSLCSLIQLRVSFSCSS  
MRAGKKAETGA AVAEPENSEGRKVTGKRRGE PVEGDGGKRAKAMPQKEGWLAEKIAEERRSARCVKFNERVR  
FLSQAQKIKEGVEGVLYWMYRDQRVQDNWALIYAQNLAL EAQLPLHVCFFLELEGPGATLREYSFLLKGLEEV  
AECEGALGVQFHLLRGSAGVMLPGFVKEWGLGAVVTDFSP LRTPLQWAEDVKEGLPPDVFPVQVDAHNVPW  
VASDKQEYAARTIRGKITKLLPEFLTQFPLVDKHPHCAARLAKPVDWAQTLSSLELDH SVGEVEWARPGTAAG  
TAMLESFIDERLRHYAPLRNNPNSEALS QLSPPWHF GHLSAQRVVLQVQ RSGASRAQSVPAFVEEMVVRRELA  
DNFCYYNKKYDQVEGAYD WARKTLQDHAGDPRPYVYTREELEKAQTYDNLWNAAQYQMVTEGKMHGFMRMYWA  
KKILEWTSSPEEALSIAIYLNDRYELDGRDPNGYVGCMWSICGIHDQGWKERPIFGKVRYMNYAGCTRKF DVA  
QFEKQYCPKRL  
>Anguilla\_japo\_\_BCT36447.1  
MAPNSIHWFRKGLRLHDNPALREAVRGAGTVRCVYFLDPWFAGSSNLGVNRWRFL LQCLEDLDASLRKLNSRL  
FVVRGQPANVFPRLFKWKISRLTFEYDSEPF GKERDAAIKKLAMEAGVEVCVKTSHTLYDLDRVIELNGGQP  
PLTYKRFQTLISRMDPPEPPVDPLCASFMGR CVTPVADDHGD KYGVPSLEELGFDTEGLPSAVWPGGETEALT  
RIERHLERKAWVANFERPRMNANSL LASPTGLSPYLRFGCLSCRLFYKLKTDLYKKVKRNSSPPLSLYGQLLW  
REFFYTAATNNPRFDKMEGNPICVQIPWDRNPEALAKWAE GCSGFPWIDAIMTQLRQEGWIHHLARHAVACFL  
TRGDLWISWEEGMKVFEELLLDADWSVNAGSMMWLSCSSSFFQQFFHCYCPVGFGRRTDPNGDIIRRYLPVLRG  
FPAKYIYDPWNAPESVQKAACVIGVQYPRPMVQHAEASRLNIERM RQIYQQLSCYRGLGLLATVPSNPGGNE  
GAAAMGACAAEGPHEGATAAGYQLSVTPQIDWSTGVHPYPPKESQSSSSTQQQGFTGGGSSLVCYRQESQQT  
TAPQGLSSILSTVKRHS EDAPPSVSSKVQRQNSN  
>Anguilla\_japo\_\_BCT36448.1  
MVVNSIHWFRKGLRLHDNPALQEALNGADTVRCVYILDPWFAGSANVG VNRWRFLLESLEDLDTSLRKLNSRL  
FVIRGQPADVFPRLFKENITRLTFEYDSEPYGKERDGA I IKMAQEFGVETRVKNSHTLYNLDR IELNNNSP  
PLTFKRFQALVSRLELPKPLPPVTRQQMDGCPAH IADNHDER YGVPSLEELGFKTHGLSPAVWKGGETEAM D  
RLNKHLDRKAWVANFERPRIGASSLMASPTGLSPYLRFGCLSCR VFYKLRRELYQQVRRHGSPPLSLFGQLLW  
REFFYAAATDNPNFDRMAGNPICVQ  
>Anhinga\_anhi\_\_NXC73818.1  
KVDYDVCSNYGNWLYSAGIGNDPRDNRKFNMIKQGLD YDGDGDYVRLWVPELQGIKGADIHTPWALNSAALSQ  
AGVTLGETYPQPVVTAPEWSRHVTQRPQGRSPHPRRGPARTPVQRKGRGIDFYFSRKKDV  
>Anhinga\_anhi\_\_NXC74850.1

RFLQCLELDLDANLRKLNSRLFVIRGQPADVFPRLFKEWNIAKLSIEYDSEFPFGKERDAAIKKLASEAGVEVI  
VRISHTLYDLDKIIELNGGQPPLTYKRFQTLISRMEPLEMPVETITPEVMEKCNTPVSDDHDEKYGVPSLEEL  
GFDTDGLPSAVWPGGETEALTRLERHLERKAWVANFERPRMNANSLASPTGLSPYLRFGCLSCRLFYFKLTD  
LYKKVKKNSSPPLSLYGQLLWREFFYTAATNNPRFDMEGNPICVQIPWDKNPEALAKWAEGRTGFPWIDAIM  
TQLRQEGWIHHLARHAVACFLTRGDLWISWEEGMKVFEELLLDADWSVNAGSWMWLSCSSFFQQFFHCYCPVG  
FGRRTDPNGDYIRRYLPVLRGFPAKYIYDPWNAPEVQKAAKCIIGVNYPKPMVNHAESRLNIERMKQIYQQ  
LSRYRGLGLLATVPSNPNGNGGGLMGYSPGESISGCGSTGGAQLGTGDGHTVVQPCALGDSHTGASGIQQQG  
YCQASSILHYAHGDNQQSOLLQAGRTALDTGISAGKRPNPEEETQSVGPKVQRQSTN

>Anhinga\_anhi\_\_NXC75889.1

RFLQSQLELDLNSLRKLNSRLFVVRGQPTDVFPRLFKEWGVTRLTFEYDSEFPFGKERDAAI IKLAKEACVDV  
IENSHTLYDLDRIIELNGHKPPLTYKRFQAIISRMELEPKKPVSTVMSQQMETCKVDIQENHDDVYGVPSLEEL  
GFPTDGLAPAVWQGGETEALARLDKHLERKAWVANERPRMNANSLASPTGLSPYLRFGCLSCRLFYRRLWE  
LYKKVKRNSTPPLSLYGQLLWREFFYTAATNNPKFDRMEGNPICIQIPWDRNPEALAKWAEGKTGFPWIDAIM  
TQLRQEGWIHHLARHAVACFLTRGDLWISWESGVRVFEDELDDADFSVNAGSWMWLSCSAFFQQFFHCYCPVG  
FGRRTDPSGDYVKRYLPKLKGFPSRYIYEPWNAPEVQKAAKCIIGVDYPKPMVNHAETSRLNIERMKQIYQQ  
LSRYRGLCLLASVPSCVEDLSGPVADSASGQGCSTSTAMRLSQADQASPKRKHEAAEELCAEELYKRAKVTCL  
PAPEIPGKSL

>Anhinga\_anhi\_\_NXC77043.1

DNWAFLYAQRALAKQELPLHVCFLVPKFLDATIRHYGFMLRGLQEVAEECAELNIPFHLLLGyakDVLPTFV  
VEHGVGGLVTDfCPLRLPRQWAEDVRQRLPEDVPFAEVDahnivPCWIASPKQEYSARTIRGKIHAQLPEFLT  
EFPPVVRHYPYPPSCPAEPIAWEACYSSQLQVDRTVKEVEWATPGTAAGLAVLQSFIAERLKSFGSHRNDPNKAA  
LSNLSPWfHFGQVSTQRAILEVQKHRGKYKESVDAFVEEA VVRRELAENFCYYNENYDSMQGGAYNWAQTTLK  
LHAKDKRPFLYKLQELEQGTTHDPLWNAAQQLQMVREGKMHGFLRMYWAKKILEWTRSPEEALQFAIYLNDRYE  
LDGTDPNGYGRADALSPCAGCLWSICGIHDQGWAERAIFGKIRYMNYAGCKRKFDVQGfFERRYAPPT

>Anhinga\_anhi\_\_NXC78071.1

MPHRTIHLFRKGLRLHDNPTLLAALESSEVVYPIYILDRKFVTSVMQIGALRWHFLLQSLLEDLQKNLCQLGSC  
LLVIQGEYESVLRDHIQKWNITQVTLDAEMEPFYKEMEANIRRLGEEELGFEVLSLVGHSLYDTRILDLNGGT  
PPLTYKRFHLHLSLLGDPEVPVRNLTAEDFQRCRPSDPGLAECYRVPLPMDLKIPPESSPWRGGETEGLQRL  
EQHLTDQGWVASFTKPRITPNSLLPSTTGLSPYFSGCLSVRTFFYRLSNIYAQAKHSLPPVSLQGQLLWRE  
FFYTVASATPNFTKMAGNPICLQIGWYEDAERLHKWKTAQTGFPWIDAIMTQLRQEGWIHHLARHAVACFLTR  
GDLWISWEEGMKVFEELLLDADYSINAGNMMWLSASAFFHQYTRIFCPVRFGKRTDPEGQYIRKYLPI LKNFA  
SKYIYEPWTASEEQKQAGCIIGQDYPFPMVNHKEASDHNQLMKQVREEQYRTAQLTRDDTDDPMEMKVKRD  
RSEENVSKPKVARMTE

>Anhinga\_anhi\_\_NXC78535.1

MQHSSIHWFRKGLRLHDNPALLAAADCRCLHPLFILDPSSSRAGAIARRFLLDALRDLDGNLRKMGSRLFVV  
RGCPEEVFPRLFHAWGTTRLTFEVDTEPPARQRDAVAELAARHGVEVIQEVSHTYDTERVLALNDGKAPLT  
YKRLQTLASLGPPPEKPAPALTREHLRDGGTRPARRAHGEDGQCSAPITLISGLLCIPDGGGHPKTRPWCASC  
PIQAWVCGFKKPETEPNSLSPSTTVLSPYLKFGCLSVRTFWWRLDEIYQGREHSRPPVSLHGQLLWREFFYTA  
GASVPNFDrmVGNPVCLOVDWDDNPQHRLAWKEGRTGYPFIDAIMTQLRTEGWIHHLARHAVACFLTRGDLWV  
SWEGLKVFEELLLDADWSL NAGNWLWLSGSAFFHRYFHVYSPVAFGKKTDRDGAYIRKYLPI LKDFPAKYIY  
EPWKAPRAMQERAGCLVGTHYPQPIVKHEAASKRNLGRMKAAARAQK

>Anisakis\_sim\_VDK18609.1\_unnamed\_pr

MNELKVKLKVCVEKNYTETLKEVHKLTDNACEVVIDAAYLRNDRDFEDSLNDQLIKSCRRLTRVEANVSVPVN  
VSSNQQEFGARTLRPKVWQYVKAMMKEKWEDVPTPECKDWKKLVKADDLKEMDLEAELKKAESECKSDSGLTG  
GEKAAKMLDFFITNRLVNYHPGRNVPGSKYQSVLSPYLHFGMLSTIETIKRAKEGKAAKHPIDSFIEELLVR  
RDLAHNFVYYARKNYDSLDSLDPWAKKTLKEHKNDKREYVYSYEELENAKTHDVYWNAAQLEMIHTNKMHGym  
RMYWGKKVIEWTPDYETAYKFLIEQNDKYELDGRDPNGYTGVMWNFGLHDRAHAVIHVFLALICTF

>Anneissia\_jap\_XP\_033101802.1\_cry-1-like

MPNRKRKRSDSPTFSRRCSVHWFRKGLRLHDNPSFLEGLKGAAEFRCVYILDPWFAGSYDNTGINRWRFLQCL  
LEDLDSNLKKLNSRLFVIRGQPSDVFPKIFKEWKVNRLSFEVDSEPFARKRDQAIRTMATEANVEVISCISHT  
LYDPLEILTLNDNEPPLTYKRFQTLISGMDPPPHPCAPTTEQLEGIERGIELDHYEKYGVPTLEELGFDTDN  
IPPVCVQGGETEAKRLDRHLERKAWIANFSPKMTPVSLMASQTGLTPYLRFGCLSSRLFYWKLSELFMMVR  
KTKTVPLSLQGQLLWREFFYTVACNNPNFDCMMGNQICVKIPWDKNQALDKWARAKTGFPWIDAIMTQLRQE  
GWIHSIARHAGCFLTRGDLWVSWEEGMKVFEELLLDADWSINAGNWIWLSSCSSFFQQFFHVYCPVTFGKRTD  
PSGDYVRKYLPVLKHFPPTYKIYAPWEAPTEVQIQAKCIVGKDYFPFPMVDHEEASRLNIERMKQVYSQLSHYAG  
PSLLAAIPSSKDSNDGKPPRMGLKSI IQHTSMHSQMTTVGTQRSSNHLHSSGMISSVPSRTSEHRRQH GALQS  
ISSTNVQPQEHKIAVANPSTSCHQLQTYDNPSTSGHQLQTMQNVTDQSGLTKYTRTFPLVLEFS

>Anneissia\_jap\_XP\_033101937.1\_cry-1-like

MLSAEILKVGSGDVGKKYPGGETAALELLHLRVQLEEKTFakNEFMPNQTPDLMGKPMSPYLRFGCISVH  
RMFWMIRDYCKVNSAEVAPTYLTSQLIWREFFYTMSATNPMYNRMKGNPICLQIDWYDDDESQKWVQGKTG

FPWIDAIMIQLHKEGWIHQVCRHAVSSFLTRGDLWISWEKGFDTFEKHLLDADWSVCAGNWMWLSSSAFEKFL  
QCPNCFPCPVRYGRRMDPSGEYIKSFLPVLKNMPLKYLFEFPWKAPLKVQEEAKCIVGKDYPKPMVKHSDVSKRN  
KKHMNDVMQVFKDIVNVNHCAPSSEQEVYDLTWLPEIDLERPTKCTADEFCTKVH

>Anneissia\_jap\_XP\_033103659.1\_photolyase

MTPKTMPPKRAKTQQDVSPKKSCLKVEAANSSEPQDFLSNVAHLRLQTAESVADFKFNKKRVRVISDAKDVPE  
QNHGIVYWMSRDQVRVDNWAMLFAQRLALKQEVPLHVCFCVVPKFLDATIRQYGFMKGLREVEQELKELDIS  
FHLLIGYAKDVLPKFIEEHQIGGLVTDIFSPLRILSEWVQEVASELPSNVPPFCQVDAHNIVPCWEASPKLEYGA  
RTIRPKIHKVLSTYLTQYPPVIKHKHKPKTEPEPNVWDAAMDSLEVDTVSEIDWAQPGTTAGLFALEDFFEN  
RLRSYEVRNDPNKTALSNSLSPWFHFGQISVQRAILTVQPYRRKHSKAAEAFIEESVIRRELADNFCFYNDKY  
DSVEGTNDWAKTSLQLHAKDKREYVYSKEQLEQSRTHDDLWNAAQIQMVSEGKMHGFLRMYWAKKILEWTESP  
EKALEIAIFFNDKYSIDGTDPNGYVGCMSVCGIHDQGWKERPVFGKIRYMNYAGCKRKFDVDQFVRKYKAKK  
Y

>Anolis\_carolinensis\_XP\_003214689.1\_PREDICTED:

MAALPGPLGRCSVHWFRRLRLHDNPALQAAIRDGGPVRCIYILDPWFFAASSSVGINRWRFLQLSLEDLDNSL  
RKLGSRLFVVRGQPTDVFPRLFKEWRVTRLTFEYDSEPFGERDAAIVKLAKEAGVEVITENSHTLYDLDRII  
ELNGHKPPLTYKRFQTIISRMDLPKKPVASITHQQMEMCKTEIQDNHDETYGVPSLEELGFPTESLAPAVWL  
GETEALTRLDKHLERKAWVANYERPRMNANSLASPTGLSPYLRFGCLSCRLFFYRLWELYKKVKRNSTPPLS  
LYGQLLWREFFYTAATNNPKFDRMEGNPICIQIPWDRNPEALAKWAEKGTGFPWIDAIMTQLRQEGWIHHLAR  
HAVACFLTRGDLWISWESGVRVFELELLDADFSVNSGSMWLSCSAFFQQFFHCYCPVGFGRRTDPSPGDYVRR  
YLPKLKGFPSRYIYEPWNAPESVQKAAKCIIGVDYPKPMVNHAETSRLNIERMKQIYQQLSRYRGLCLLASVP  
SCMEDLSNPVADTSSSHGNCIGTASRQTHCGQTSPPKRKHVVQYQYKEELYKRAKVVASQFAENPRQELVHHM  
GN

>Anolis\_caroline\_XP\_003227011.1

MPQKRKKRKEPASGDCENQVEGDGGSFSGSESGDKKTEGKPEEKKPKKTAATAVAKGPPLTEAVKASRLKMAPSI  
AEFHFHNKKRVRMISENSDLKEGAQGILYWMSRDQVRVDNWAFLYAQLALKQNLPLHVAFLVFPKFLEATIRQ  
FGFMLKGLKEVAEECQELSIPFHLLIGFAKDTLPPFVAKHNIAGVVTDFAPLRVPMQWVQEVQERLPPDVPFV  
QVDAHNVPVCWVASEKQYEGARTIRRKIHDLCEFLTGFPPVIQHPHQAASQAEPIDWDACSASLEVDRSVPE  
VEWAKPGSAAGLLVLGEFVQERLKFFSSDRNNPNRAALSNSLSPWFHFGQVSVQRAILEVRKHRTCRRESVEAF  
IEEALIRRELADNFCFYNPNDYKVEGAYEWAKTTLKLHATDKRPHLYTLKQLEEGKTHDQLWNAAQQLQMVHEG  
KMHGFLRMYWAKKILEWTNSPEEALKFSIYLNDRYELDGRDPNGYVGCMSVCGIHDQGWAERAVFGKIRYMN  
YAGCTKKFDVGQFERKYNPRKIAY

>Anolis\_caroline\_XP\_008108122.1

MSHRTIHLFRKGLRLHDNPOTLLAALKSSEIVFPVYILDRKFMTSAMQLGTIRWHFLLQSLADLQASLKKLNSC  
LWIIQGEYEAILREHVKKWNITQVTFDDEIEFPYKEMERTIQNIGKEMGFVFSMVGHITLYDVKRIVELNRGT  
PPLTYKRFLQILTTLGDPPEMPVEDLTAENSQKLCPLPEEDLDECYRVPLPEDLGISKEHLSPPWRGGETTGLQR  
LEEHMKNQGWIAKFTKPRTPNSLLPSTTGLSPYFSLGCLSVRMFFYRLSKIYAQSKNHSPPVSLQGQLLWR  
EFFYTVASATPNFTKMVGNPICLQIEWYEDAEKLHKWKTATGFPWIDAIMTQLRQEGWIHHLARHAVACFLT  
RGDLWISWEEGMKVFEELLLDSDYSINAGNWMWLSASAFFHQYSRIFCPVRFGKRTDPEGHYIRKYL PVLKNF  
PSKYIYEPWTAPAEAQREAGCIIGKEYPFPMVNHKEVSDNNLQMLKQVREEQYKTAQLTRDDVDDPMEMGLKH  
RHSEEVTPKGGKHARKAEEL

>Anolis\_caroline\_XP\_008110409.2

MASSLPRTALCLLRNDLRCHDNEVLHWAQSHADRIVPLYCFDPRHYAQTYHYNFPKTGPFRLRFLLESVKDLR  
ETLKKKGSNLVVRKGKPEDVVRDLIIQLGVSASVSFHEEATKEELDVEKALIRVCTEHGVEVQTFWGSTLYHR  
QDLFPKHISQLPDVYTQFRKAVESQARVRPVLKMEGQMKSLPPEIEEGNIPSLDFGMTEPLRDPRAFLCSG  
GETQALMRLQHYFWETNLVASYKETRNLIGLDYSTKFAPWLALGCISPRYIYDQIQKYEKERTANQSTYWVL  
FELAWRDYFRFVALKYGRKIFFPRGLQDKDISWKKDPKLFDAWKEGRTGVPPVDANMRELATTGFMSNRGRQN  
VASFLTKDLGLDWRMGAEWFESELLVDYDVCSNYGNWLYSAGIGNDPRENKRKFNMIKQALDYDGNGDYARLWVP  
ELQCIRGGDVHTPWALSNGALSQAGVSLGSSYPVPIIKAPEWGRHINQKPSNQGPKGKRGPSHTPKQHKNRGV  
DFYFSSHKKDLS

>Anolis\_car\_XP\_003220970.1\_cry-1\_X1

MGVNAVHWFRRKGLRLHDNPALREVIQGADTVRCVYILDPWFAGSSNVGINRWRFLQLCLEDLDANLRKLNSRL  
FVIRGQPADVFPRLFKEWNITKLSIEYDSEPFGERDAAIKKLASEAGVEVIVRISHTLYELDKIIELNGGQP  
PLTYKRFQTLISRMEPLEIPVETITAEVMSKCTTPVSDDHDEKYGVPSLEELGFDTDGLPSAVWPGGETEALT  
RLERHLERKAWANFERPRMNANSLASPTGLSPYLRFGCLSCRLFYFKLTDLYKKVKKNSSPPLSLYGQLLW  
REFFYTAATNNPRFDKMEGNPICVQIPWDRNPEALAKWAEGRGTGFPWIDAIMTQLRQEGWIHHLARHAVACFL  
TRGDLWISWEEGMKVFEELLLDADWSVNAGSMWLSCSSFFQQFFHCYCPVGFGRRTDPNGDYIRRYLPVLRG  
FPAKYIYDPWNAPDGVQKAAKCIIGVNPYKPMVNHAESRLNIERMKQMYQQLSRYRGLGLLASVPSNNGNG  
NGGLMGYSTGENIPGCTNTNGSQMGMEGHIGNVQACTMGESHTGTSGIQQQGYSQGSIGILLYSHGDNQKTHS  
AQKGRISLGTGVCTGKRPSPEVETQSVGPKVQRQSSN

>Anolis\_car\_XP\_003225762.1\_cry-1

MAHVSIIHWFRKGLRLHDNPALLAAMKNSAEIYPIFILDWPWFPMQVVSINRWRFLIESLKDLDESLLKLNLSRL  
FVVRGRPAEVFPPELFTKWKVTRLAFEVDTEPYARRDAEVVRLAAEHGVQVIQKVSHTLYDTERIIIVENS GKAP  
LTYTRLQTLVASLGPPKQVPVPAKLEDMKDCCTPVKEDHDLEYGTPSYEELGQDPKTAGPHLYPGGETEALAR  
LDLHMKRTSWVCNFKKPETHPNSLTPSTTVLSPYVKFGCLSVRMFWWKLAEVYQGRKHS DPPVSLHGQLLWRE  
FFYTAGAGIPNFDRMENNPVCVQVDWNNQEYLRRAWREGQTGYPFIDAIMTQLRTEGWIHHLARHAVACFLTR  
GDLWISWEEGQKVFEELLLDADWSLNAANWQWLSASAFFHQFFRVYSPVTFGKKTDKNGEYIKKYLPFLRKFS  
NDYIYEPWKAPRSLQERAGCIIGQDYPKPIVEHEKVYKRNLERMKAAYARRSPNLVIQAKDKVSQKKGVNKRK  
PEAPTKAKVQAKKVKTKSS

>Anseranas\_semi\_\_NXI69464.1

CIYILDPWF AASSAVGINRWRFLLQSLEDL DNSLRKLNLSRLFVVRGQPTDVFPRLFKEWGVTRLTFEYDSEPF  
GKERDAAIVKLAKEAGVEVVIENSHTLYDLDRIIELNGNKPLTYKRFQAIISRME LPPKPVSSVTSQQMETC  
KVDIQENHDDVYGVPSLEELGFPTDGLAPAVWQGGETEALARLDKHLERKAWVAN YERPRMNANSLLASPTGL  
SPYLRFGCLSCRLFYRLWELYKKVKRNSTPPLSLYGQLLWREFFYTAATNNPKFDRMEGNPICIQIPWDKNP  
EALAKWAEGKTGF PWIDAIMTQLRQEGWIHHLARHAVACFLTRGDLWISWESGVRVFEDELLDADFSVNAGSW  
MWLSCSAFFQQFFHCYCPVGFGRRTDPSGDYVKRYLPKLKGFPSRYIYEPWNAPESVQKAAKCIIGVDY PKPM  
VNHAETSRLNIERMKQIYQQLSRYRGLCLLASVPSCVEDLSGPVADSASGQSSTSTAMRLPQSDQASPKRKH  
EGAEELCTEELYKRAKVTGLPAPEIPGKS

>Anseranas\_semi\_\_NXI71217.1

DNWAFLYAQRLALKQELPLRVCFCLVPKFLDATIRHYGFMLRGLQEGGKECTELNIPFHLLLG YAKDVLPAFV  
VEHGVGGLVTDFCPLRVPRQWVEDVREQLPEDVPFVQVDAHNIVPCWVTS PKQEYSARTIRGKIHSLLPEFLT  
EFPPPIIRHPPHPPSCPAEPIAWDACYSLLQVDRTVTEVEWATPGTAAGLAVLQSFIDKRLKSFGSQRNDPNKAA  
LSNLSPWFHFGQVSTQRAILEVQKHRRTYKESVDAFVEEAVVRRELADNFCYYNENYDSVQGAHDWAQTTLKL  
HAKDKRPFLYELQQLQEQATTHDPLWNAQLQMVREGKMHGFLRMYWAKKILEWTRSPEEALRFAIYLNDRYEL  
DGRDPNGYVGKLREGSRGCLWSICGIHDQGWKERDVF GKIRYMNYAGCKRKFDDVDQFERRY

>Anseranas\_semi\_\_NXI71662.1

KVDYDVCSNYGNWLYSAGIGNDPRDNRKFNMIKQGLDYDGTGDYIRLWVPELQGIKGADIHTPWALNSATLSQ  
AGVTLGETYPPQPVVTAPEWSRHISQRPHGRSPHPRGRGPAHTPMQHMGRGIDFYFSRKKDE

>Anseranas\_semi\_\_NXI73833.1

RFLQCLEDL DANLRKLNLSRLFVIRGQPADVFPRLFKEWNI AKLSIEYDSEPF GKERDAAIKKLASEAGVEVI  
VRISHTLYDLDKIIELNGGQPP LTYKRFQTLISRMEPLEMPVETITPEVMEKCTTPVSDDHDEKYGVPSLEEL  
GFDTDGLPSAVWPGGETEALTRLERHLERKAWVANFERPRMNANSLLASPTGLSPYLRFGCLSCRLFYFKLTD  
LYKKVKKNSSPPLSLYGQLLWREFFYTAATNNPRFDKMEGNPICVQIPWDKNPEALAKWAEGRTGF PWIDAIM  
TQLRQEGWIHHLARHAVACFLTRGDLWISWEEGMKVFEELLLDADWSVNAGSWMWLSCSSFFQQFFHCYCPVG  
FGRRTDPNGDYIRRYLPVLRGFP AKYIYDPWNAPESVQKAAKCIIGVNYPKPMVNHA EASRLNIERMKQIYQQ  
LSRYRGLGLLATVP SNPNNGNGGLMGFSPGESISGCGSTGGAQLGTGDGQTVGVQTCALGDSHTGASGIQQQ  
GYCQASSILHYAHGDNQQSHLLQAGRTSLGTGISAGKRPNPEETQSVGPKVQRQSTN

>Anseranas\_semi\_\_NXI73871.1

MPHRTIHLFRKGLRLHDNP TLLAALESSEVVYPVYILDRKFMTSVMHIGALRWHFLLQSLEDLQKNLCQLGSC  
LLVIQGEYESIVRDHVQKWNITQVTLD AEMEPFYREMEANIRCLGEELGFVLSLVGHSLYDTKRILDNDGT  
PPLTYKRFLHILSLLDGPEVPVRNLTGEDFQRCRPPDLGLAECYRVPLPADLKIP PESISPWRRGETEGLQRL  
EQHLTDQGWVASFTKPR TIPNSLLPSTTGLSPYFSMGCLSVRTFFYRLSNIYAQAKHHS LPPVSLQGQLLWRE  
FFYTVASATPNFTKMAGNPICLQISWYEDAERLHKWKMAQTGF PWIDAIMTQLRQEGWIHHLARHAAACFLTR  
GDLWISWEEGMKVFEELLLDADYSINAGNMMWLSASAFFHQYTRIFCPVRFGKRTDPEGQYIRKYLPVLKNFP  
SKYIYEPWTASEEEQKQAGCIIGQDYPFPMVDHKEASDHN LQMLKQVREEQYRTAQLTRDDTDDPMEMKLRD  
HSEENVTKAKAAKMTE

>Antrostomus\_caro\_\_KFZ50447.1

DNWAFLYAQRLALKQELPLHVCFCCLVPKFLDATIRHYGFMLKGLQEVAKECAELNIPFHLLLG YAKDVLPTFV  
VEHGVGGLVTDFCPLRLPRQWVEDVRERLPEDVPFAQVDAHNIVPCWVASPKQEYSARTIRGKIHAQLPEFLT  
EFPPVICHYP PPSCKAEPIAWEACYSSLLQVDRTVKEVEWATPGTAAGLAVLQSFIAERLKSFGAGPSTAARTS  
SPTCSLPMFPGQVSTQRAILEVQKHQSKYKESVDAFVEEAVVRRELAENFCYYNENYDSVQGAYDWAQTTLKL  
HAKDKRPFLYELQKLEQGTTHDPLWNAQLQMVREGKMHGFLRMYWAKKILEWTHSPEEALRFAIYLNDRYEL  
DGRDPNGYVGKLQDGMGLRPHWPAAASGPSAICGIHDQGWAERAIFGKIRYMNYAGCKRKFDDVGQFERRYAP

>Antrostomus\_caro\_\_XP\_010162591.1

MSHRTIHLFRKGLRLHDNP TLLAALESSEAVYPVYILDRKFMTSVMHIGALRWHFLLQSLEDLQKNLCQLGSC  
LLVIQGEYESVLRDHVQKWNITQVTLD AEEVPFYKEMDANIRCLGEELGFVLSLVVHSLYDTKRILDNDGT  
PPLTYKRFLHVL SLLDGPEVPVRNLTAEDEFERCRPPDLGLDESYKVPLPADLKL PSESLSPWRRGETEGLRRL  
EQHLIDQGWVTSFTKPR TIPKSLLPSTTGLSPYFSVGCLSVRTFFYRLSNIYAQAKHHS LPPVSLQGQLLWRE  
FFYTVASATPNFTKMAGNPICLQIRWYEDAERLHKWKTAQTGF PWIDAIMTQLRQEGWIHHLARHAVACFLTR  
GDLWISWEEGMKVFEELLLDADYSINAGNMMWLSASAFFHQYTRIFCPVRFGKRTDPEGQYIRKYLPVLKNFP

SKYIYEPWTASEEEQKQAGCIIGQDYPPFMVNHKEASDHNQLQMKQVREEQYRTAQLTRDDTDDPMELKVKRD  
HSEESVSKGKVAKMTEQTEIPPGITCWEPKNGKRGKAEGS

>Antrostomus\_caro\_\_XP\_010167338.1

NLVASYKETRNLVGM DYSTKFAPWLALGCISPRYIYEQIQKYEKERTANQSTYWVLFELLWRDYFRFVALKY  
GKRIFSLRGLQSKEIPWKKDLQLFDCWKEGKTGVFPVDANMRELAVTGFM SNRGRQNVASFLT KDLGLDWRMG  
AEWFEYLLVDYDVCSNYGNWLYSAGVGN DPRDN RKFNMIKQGLDYDGN

>Antrostomus\_caro\_\_XP\_010173579.1

FLLQCLEDLDANLRKLNSRLFVIRGQPADVFPRLFKEWNI AKLSIEYDSEPF GKERDAAIKKLASEAGVEVIV  
RISHTLYDLDKIIELNGGQPPLTYKR FQTLISRMEPLEMPVETITPEVMEKCTTPVSDDHDEKYGVPSLEELG  
FDTDGLPSAVWPGGETEALTRLERHLERKAWVANFERPRMNANSL LASPTGLSPYLRFGCLSCRLFYFKLTDL  
YKKVKKNSSPPLSLYGQLLWREFFYTAATNNPRFDKMEGNPICVQIPWDKNPEALAKWAEGR TGFPWIDAIMT  
QLRQEGWIHHLARHAVACFLTRGDLWISWEEGMKVFEELLLDADWSVNAGSMMWLS SCSSFFQQFFHCYCPVGF  
GRRTDPNGDYIRRYLPVLRGFP AKYIYDPWNA PESIQKAAKCIIGVNYPKPMVNHA EASRLNIERMKQIYQQ L  
SRYRGLGLLATVPSNPNGNGGGLMGYS PGESISGCGNTGGAQLGTGDSHTVVQPCALGDSHSGASGVQQQGY  
CQASSILHYAHGDNQQSHLLQAGRTSLGTGISAGKRPNPEEETQSVGPKVQRQSTN

>Antrostomus\_caro\_\_XP\_010173836.1

MQHNSIHWFRKGLRLHDNPALLAAVRDSRCLHPLFILDPTDAPPGANARRFL LDSLWDL DGNLRKMGSRL LVA  
WGCPQEVFPRLFHAWRTTRLTFEVDTEPSARRRDA AVAELAAQH GVEVIQEVSH TLYDTQRVLALNDGKAPLT  
YKHLQKLLVSLGPPEKVPAL TQEHLQGCHTLCQLSHDTNYDVPTLEELGQDPNEVGPHLYPGGETAALARLD  
TLMEKTTWVCSFKK PETEPTSLIPSTTVLSPHLKFGCLSVRTFWWR LDEIYQGH SQPPVSLHGQLLWREFFYM  
AGAGIPNFRDMVGNPICLQVNWDDNPQHLHAWREGRTGYPFIDSIMTQLRTEGWIHHLARHAVACFLTRGDLW  
ISWEEGLKVFEELLLDADWSLNAGNWLWLSGSAFFHRYFHVYSPVAFGKKTDQD GAYIRKYLPI LKDFPAEYI  
YEPWKAPRAVQERAGCLVGTHYPQPIVEHGVVRERNMGRMKAARAQKGT KREPPADPSVDKSRKKPKAERC

>Antrostomus\_caro\_\_XP\_010174076.2

FLLQSLEDLDNSLRKLNSRLFVVRGQPTDVFPRLFKEWGVTRLT FEYDSEPF GKERDAAI IKLAK EAGVEVVM  
ENSHTLYDLDRIIELNGHKPPLTYKR FQAIISRME LPKKPVSTVTSQQMEACKVDIQENHDDVYGVPSLEELG  
FPTDGLAPAVWQGGETEALARLDKHLERKAWVANYERPRMNANSL LASPTGLSPYLRFGCLSCRLFYRLWEL  
YKKVKRNSTPPLSLYGQLLWRXGVPPATNNPKFDRMEGNPICIQIPWDRNPEALAKWAEGKTGFPWIDAIMTQ  
LRQEGWIHHLARHAVACFLTRGDLWISWESGVKVFDELLLDADFSINAGSMMWLS CSAFFQQFFHCYCPVGF  
RRTDPSGDYVKRYLPKLKGFP SRYIYEPWNA PESVQKAAKCIIGVDY PKPMVNHAETSRLNIERMKQIYQQ L  
RYRGLCLLASVPSCVEDLSGPVADSASGQGCSTSTAVRLSQADQASPKRKHEGA EELCTEELYKRAKVTGLPA  
PEIPGKSL

>Apaloderma\_vitt\_\_XP\_009863296.1

RFLQSLLEDLDNSLRKLSSRLFVVRGQPTDVFPRLFKEWGVTRLT FEYDSEPF GKERDAAI VKLAKEAGVEVV  
IENSHTLYDLDRIIELNGHKPPLTYKR FQAIISRME LPKKPVSTVASQQMETCKVDIQENHDDVYGVPSLEEL  
GFPTDGLAPAVWQGGETEALARLDKHLERKAWVANYERPRMNANSL LASPTGLSPYLRFGCLSCRLFYRLWE  
LYKKVKRNSTPPLSLYGQLLWRGXVTPATNNPKFDRMEGNPICIQIPWDRNPEALAKWAEGKTGFPWIDAIMT  
QLRQEGWIHHLARHAVACFLTRGDLWISWESGVRVFDELLLDADFSVNAGSMMWLS CSAFFQQFFHCYCPVGF  
GRRTDPSGDYVKRYLPKLKGFP SRYIYEPWNA PESVQKAAKCIIGVDY PKPMVNHAETSRLNIERMKQIYQQ L  
SRYRGLCLLASVPSCVEDLSGPVTD SASGQGCSTSTATRLSQADQASPKRKHEGA EELCAEELYKRAKVTGLP  
APEIPGKSL

>Apaloderma\_vitt\_\_XP\_009864284.1

MPHRTIHLFRKGLRLHDNP TLLAALESSEVVYPVYILDRTFVTSAMRVGALRWHFLLQSLEDLQKNLCQLGSC  
LLVLQGEYEAVLRDHVRRWEITQVTLDAEMEPFYKEMEANI QRLGEELGFKVLSLVGHSLYDTRILELNGGT  
PPLTYKRFLHILSLLDGPEVPVRNLTAQDFQXSLSHVRCKSPDRSLADCYRVPLPADLKI PPESLSPWRGGET  
EGLQRLEQHLTDQGWVASFTKPR TIPNSLLPSTTGLSPYFSLGCLSVRTFFYRLSNIYAQAKHHS LPPVSLQG  
QLLWREFFYT VASVTPNFTRMAGNPICLQISWYEDAERLHKWRTAQTGFPWIDAIMTQLRQEGWIHHLARHAV  
ACFLTRGDLWISWEEGMKVFEELLLDADYSINAGNMMWLSA SAFFHQYTRIFCPVRFGKRTDPEGHYIRKYL P  
ILKNFASKYIYEPWMASEEEQKQAGCIIGQDYPPFMVNHKEASDHNQLQMKQVREEQHRTAQLTRDDTDDPMD  
VKVKRDHSEENVAKGKAAMTEQTEIPSGITCCEPEN GKKEPEAS

>Apaloderma\_vitt\_\_XP\_009867267.1

SVREFKYNKKRVRLISQGS DLKDDARCILYWMSRDQRVQDNWAFLYA QRLAL KQELPLHVCFLVPKFLDATI  
RHYGFMLRGLQEVAKECAELNIPFHLLLG YAKDVLPAFVVEHGVGGLVTD FSPLRLPRQWVEDVRERLPEDVP  
FAQVDAHNIVPCWVASSKQEYSAWTFRSKINAQLPWF LTEFPPIIRHPYPPSCSAEPIAWEACYSSLQVDRTV  
KEVEWATPGTAAGLAVLQSFIAERLKSFGSHRNNPNKAALSNLSPWFHFGQVSTQRAILEVQKHQHKYKESVD  
VFVEEAVVRRELS ENFCYNNENYDSVQ GAYDWAQTTLKLHTKDKRPYLYKLQELEQGSTH DPLWNAAQLQMVR  
EGKMHGFLRMYWAKKILEWTRSP EEALQFAIYLNDRYELDGRDPNGYVGCLWSICGIHDHGAVFGKIRYMN YA  
GCKRKFN VGEFERRYAPGDGHSVP

>Apaloderma\_vitt\_\_XP\_009868834.1

FDTDGLPSAVWPGGETEALTRLERHLERKAWVANFERPRMNANSLLASPTGLSPYLRFGCLSCRLFYFKLTDL  
YKKVKKNSSPPLSLYGQLLWREFFYTAATNNPRFDKMEGNPICVQIPWDKNPEALAKWAEGRGTGFPWIDA  
MTQLRQEGWIHHLARHAVACFLTRGDLWISWEEGMKVFEELLLDADWSVNAGSWMWLSCSSFFQQFFHCYCPVGF  
GRRTDPNGDYIRRYLPVLRGFPKAYIYDPWNAPESIQKAAKCIIGVNYPKPMVNHAEASRLNIERMKQIYQQL  
SRYRGLGLLATVPSNPNGNGGMLMGYSPGESISGCGSTGGAQLGTGDGHTVVQPCALGDSHAGASGIQQQGY  
CQASSILHYAHGDNQQSHLLQAGRTALGTGISAGKRPNPEEETQSVGPKVQRQSTN

>Apaloderma\_vitt\_\_XP\_009873484.1

KDLRETLKKKGSTLVVRKGPEDVVRDLIIQLGSVCAVAFHEEATQEELDVEKGLCQVCSQHGVKVHTFWAST  
LYHRDDLPRPIARLPDIYTHFRKAVESEAKVRPTLQVADQLKPLAPGVEEGSIPTMEDLGQEDPVTDPRTAF  
PCSGGETQALMRLQYYFWDNTNLVASYKETRNGLLGMDYSTKFAPWLALGCISPRYIYEQIRKYEKERTANQST  
YWVLFELLWRDYFRFVALKYGRRIFSVRGLQSKDVPWKDLQLFDRWKEGKTGVPFVDANMRELAATGFMSNR  
GRQNVASFLSKDLGLDWRMGAEWFEYLLVDYDVCSNYGNWLYSAGVGNDPRDNRKFNVIKQGLDYGNGDYVR  
LWVPELQGIKADVHGPWALSRAALSQAGVTLTGETYPWPVVTAPPEWSRHINQRPVSTGKVVMMGRRGPAHKDRG  
IDFYFSRKKDV

>Aphanomyces\_eut\_KAF0733358.1\_Ae201684\_0

MDERPAPKRKEPSSPQERAASTPSPRKKQAVDKMGPTSLIWFRKGLRLHDNPALVEAIRGARHLIPVMVIDP  
ALAHPGKCGARPLQFFLECVQDLDRSLQARQSRLVILHGDPSLIPRYVKRWGVSKLCFEEDTGRYSQARDAA  
VRDSIASSVAVRSFSTHTLYKSADVRKVYAPNGYPQKYEAFLTRVRSLEIDDPLPDASLPETFPPVPDDAISE  
SQSIPTIQSLGFDCQLDPIPLVGGETSALERMEKALEDEKVVDRDFQKPMSPALAIAPASTTCLSPYLARGCLS  
VRLLYSKIETILAKGTHSKPPVSLKGQLLWREFYAAASYLTPNYEMEGNPVCRQIPWSRDAEKLEAWTNALT  
GYPWIDAAMTQLRQEGWIHHLARHAVACFLTRGDLWVDWRLGRDVFDMMLLDTPALNNGNWQWLSASAYFHQ  
YFRVYGPVSFAKKYDSSGAYIRHYLPVLRKMPDKFIYEPWKAPKAVQSAAGCVLGKDYPKRIVVHEVVSKELT  
ERMAAVYKASK

>Aphanomyces\_eut\_KAF0744011.1\_Ae201684\_0

MRLQAADLARKGLRKERLQWLRTATEDGTHVLYWMQTSRLTKFNFALEVAVDAASRLKQPLHILHTIETPAT  
ERHIAFLLES�VDVHTTLAKKNLHLSVAHGAKPSVEVALLASKGASVVIDHPYLRDANALNQNFASATTSV  
LQVEGDVAVPVEHASDKEEHAARTIRPKITKLLDKYLVPLEPADASNIPESKPLSETLQDCGWLDMSSQSVDDL  
LASFPSLDRSIFRVSTFKGGETSAQANLASFLKNKLKYDTSRNEPSGDGSSNMSPYLHYGNISPDIALQTK  
AFPGTGPALSASKAAFLLEELIVRRELSMNFVWYNPRYDTFAALPAFAVQTLHDHADDARPHYTYTFEQLDKAKT  
ADVWNAAQQLDMILTGMHNYMRMYWGKKIIIEWTASPEDAFRYAIELNDKYNLDGYDPNSYTGIAVWVFGKHDQ  
GWKERPIFGKVRYMNAEGLERKFNMAGYIGKIRKLAQARGLSVGSTLTLPAAATKKRRK

>Aphrocallistes\_vas\_CAD24679.1\_photolyase

MESLSITEFSPSAPSPISSSSSPDEETDRDIVAKDIEQDVEPQGVLLHIFNNRHLRLKDNTALYQAMAQNP  
KFYAVYIFDGFDSKPVAPVRWQFLIDCLEDLKEQLNGFGLLEYCYFRGETIDVLATLVQAWKVLLSINMDPDV  
NFTFFNEKIVKMCTINAVQLYNDMDSHRLLYLPPKYKSAIPMSKFRVLLAEAITAKQNNLESEAKIQDITPPL  
NPEQLSDLGNKPRLDSPLPSEIPKLNALFTEEEIAKLNFIQGGERRTEDYLNEYREARLRDVSDEDEDASPIA  
AKAMGISPHLRFGCITPRHLNFVLKTIKDANYSRIKINKVLGIMARDFALQVSQIQOTIPERIIISLNKICLP  
IPWDKNNEIVEKLTDAQTGFPFFDAAITQLKTEGYVINEVSEALATFVTNSLLWVSWEEGQNFSSQHILCFD  
LAMSTHSWLEASGSTMVTGRQKSYQDPLLFSVSKKLDPNGEYIKRYLPKFINFPIEFIHKPGNASLEAQQAANC  
VIDIDYPKPLFEYECRNGICCKRLRVFMEVVDSSAAKATKLPVHIENCSGKFP

>Apis\_mel\_NP\_001077099.1\_cry\_2

MTGSRSSSEINPKEGLYDEGGKHTVHWFRKGLRLHDNP SLREGLAGASTFRCVFVLDPWVAGSTNIGINKWRFL  
LQCLEDLDCSLRKLNSRLFVIRGQPADALPKLFKEWGTNTLTFEEDPEPFGRVRDHNISALCKELGISVQKV  
SHTLYKLDEIIERNQDKPPLTYHQFQTVVASMDPPPEPPVPTVTSACVGSAYTPLKEDHDDHYGVPTLEELGFD  
TEGLLPPVWVGGESEALARLERHLERKAWVASFGRPKMTPQSLPSQTGLSPYLRFGCLSTRLFYQQLTDLYK  
KIKKAVPPLSLHGQLLWREFFYCAATKNPNFDRMQGNPICVQIPWDKNVEALAKWANGQTGFPWIDA MTQLR  
EEGWIHHLARHAVACFLTRGDLWISWEEGMKVFEELLLDADWSVNAGMWMWLSCSSFFQQFFHCYCPVRFRK  
ADPNGDYIRRYLPVLRKPNFTRYIHEPWNAPLNVQRAAKCIIGKDYSLPMVNHSKSSRINIERMKQVYQQLNKY  
RGNGVSLKGETVGLLNALPPSSMKETEEEEKKTKQSLSPSENQSKMEILPKTTQRQHHH

>Apis\_mel\_XP\_006564509.1\_deoxyribod

MEELNPFKRRKVFDLLKKFEDNRKNTSESIMTFKFNKKRIKRLNNLNDIKENCNGILYWMFRDIRIQDNWALL  
FAQKAALKNNVPLHICFLISNFLNASIRYKFLKGLEEIEKECKKLNINFHLLHGEPNINILFKIKIYNMG  
AIITDFYPLKLPMLWIDNVKKNLPKDIPIQVDAHNIIVPCWYASSKQEFAAKTIRNKINTKLEEFLETFPPVI  
KHPYTPKEKFEKNNWKIALQNVVDKSVKEITWAKPGYENGIKELNENFLQNRLLKKYGDERNNPLSNAINLS  
WFHFGMISVQRCILEIKEYKKLYKKSVESEFMEEAIRKELSDNFCFYNEKYDLIEGAYPWAETLNKHKRDKR  
KYIYFLNHNLESENTHDDLWNACQNMVTIGKMHGFLRMWAKKILEWTETPEIALKWANYLNNKYSIDGCDPN  
GYVGCMMWSICGVHDHGWPERRDIFGKIRYMNYEGCKRKFNIAEFVMKWGKKKTNELI

>Aplysia\_cal\_XP\_005089742.1\_cry-1\_X1

MEENDTKSHVSVHWFRHGLRLHDNPALLDSLENCREFYPVFILDGNVAGISSAAFPQMQLFETLQDLDDNLR  
SHGSRLFVLRGKPVDFVFAKMFEEWGVTRLTTFEQDPEPVWQERDNSVKALCDKQNVWEIERVSHMLWEPRILE

ENGGEPLTYAMFNQVAQVVGPPPKVGDPDFSGISLPCRKDDEESYKLPSLEEIDIRPESEEQASPFGRYL  
GETKALKLLSSRLEKEHEAFSIGQCLPTQLNPNLIGMPMSLSPHLRFGSLSVRKFYWSLRDTSQLFDPDRVP  
GSITSQVLWREYFYCMSVNNPMYNRMKENPICLDIDWYDDEQKFEEKWKKGQTGF PWIDACMRQLLQEGWIHQV  
CRHAVACFLTRGDLWIDWQGLKVFDRYLLDADWSVCAGNWMWVSSSAFEKVLQCPRCICPVRYGKRIDPTGA  
YVRRYVPELKRMPLOYLFEPWKAPLKLQEEVDCIIGKDYPEPMVDHRTASKECKTKMEAIKKVSKDVPHIAPA  
NEEEVLTLMWSGKQTRSELMDACTHNLDKICL

>Aplysia\_cal\_XP\_005098341.1\_cry\_DASH\_X

MKVNICMLSVLRFTGIDHSFTFCRCLIKTPIGVASISSTPVVERKSCRDYSTRLSKSHRPEKVAKLQSGEP  
KMSSSFSSSPVNTVIYLFNRNDLRVHDNEALLLANQKGTRLLPLYCFDPRHYSPTYHFGFPKTGNHRLSFLLDSV  
KDLQKNLKSRSGLVIRKKGPEEVIPDLLRNLNVRTDAAVVFQKEVMEEEVKVEKAEAHVNVVNTTWGHTL  
YHVEDLPFQPIRLPDVYTQFRKKVEDNTTIRKCVHVPDALKPLPEGIEVGSLSPSYEDLGVSEPEKDSRAAFP  
LGGETTALERLHSLWGTDNVSTYKETRNGMIGSDYSTKFSPWLAHGCLSPRKIYWEIKKYEKERTSNQSTYW  
VIFELIWRDYFRFVGLKYGNKLFHSGGIKGDREVKVNEQFKAWQEGRTGVPYVDANMRELMATGFMSNRGR  
QNVASFLLTKDLHLDRWLGAEWFEMLIDHDVCSNYGNWLYSAGIGNDPRENKRFNVVKQGLDYDAEGDYVRLW  
VPELAGIKTGSVHCVWTLSPAVLESGLVSLGQTYPLPLVKAPEWSRHVNRPGSSGGGRDKGPGSARGRGQNK  
SHRGQGHQSQQAGQKRGLDFYFSSSKPH

>Aplysia\_cal\_XP\_012935158.1\_photolyase

MSSSDEEVVNGGATSKTEQEEKTKDSKGRKRAVKRKQDSKTNTSAAKAKTAETAASEDSNGESDSPSKSEAGGD  
TGDFIERINKQRTSVCASVDKFKFNKNRVRVLSKEEDFPDDSDGVVYWMSSRDQVRVQDNWAFLYAQLALKEA  
PLHVCFCCLVPKFLEATIRQFGFLLKGLAQVEKECRELNIAFHLLGEASKVLPQFVKDNSIGGVVTDFSPLRT  
PAKWVDELKEALPEDVPLCQVDAHNIVPCWLASPKLEYGARTIRNKIHNQLGSFLTEFPVSRHPHPPSKMPP  
VTDWKAADGYLQVDRSVAEVTWAKPGTDPGLRMLESFCEKRLKSFATSRNDPNKQALSNSLPWIFHGQISVQR  
CILMVKKYRSKSSEGVNAFIEEAVIRRELADNFCFYNEKYDSVKGAYDWAQKTLKIHS GDKRPYLYDREKLEQ  
GKTHDDLWNAAQIQMVTEGKMHGFLRMYWAKKILEWTPSPAVALTEAIYLNLDKYNLDGRDPNGYVGCMSWICG  
IHDQGWAEERDVFGKIRYMNYKGCQRKFDVANFVRKYGKKKA

>Aplysia\_cal\_XP\_012941094.1\_cry-1

MKENLPDNPNTMSQDPKKHSLFWFRKGLRIHDNPALIAAIEGASTYRCVYILDPWFAGASQVGINKWRFLLES  
LEDLDSSLRKLNSRLFVVRGQPADVLPRLFQEWAITCLAFEEDPEPYGKERDSAISAMAREFNVQVIAKSSHT  
LYDPKLVIAANGNSPPLTYKRFQSVLSTLEPPNQPCETMTARLLHEMTTPVADDHDDRFVPSLDELGFDTDT  
LDVAHFGRGESEAVARLHRHLERKAWVASFERPKMSPQSLYPSGTGLSPYLRFGCLSAFTFYWKLTLEYKKVK  
KGAEPPALALHGQLLWREFFYTATNNPNFDRMVGNISCVQIPWEHNPEALVKWAEGMTGF PWIDAIMVQLKKE  
GWIHHLARHAVACFLTRGDLWISWEEGMKVFDEMLLDADWSVNAGMWWLSCSAFFQQFFHCYCPVGFGKRAD  
PSGDFVRHYLPVLKAMPTKYIYEPWTAPESVQKVAKCIVGKDYPMMPMVHSDVSRINLERMRQVYKRLVLQSS  
TSKRMFLDLPKIPKVSMLFSKAKMFLSSSSDDEVSQKQRRRKQVDE

>Aplysia\_cal\_XP\_035828705.1\_cry-1

MGKHRAIHWFRLRLHNDPALLKACEQASELYPIFVLDPWFASSPQCHVGCNRWRFLQLALQDLQSLQSLN  
LRLFVIRGQPEVEIEKLCQQWSITKLTYEADTEPYAVQRDAKVEARMEALGVEVIKCVSHTLFDVNLTVKNNG  
GCAPLTYQKFQSVLSKMGTPAKALLSPTLTDLEGCKTPVSSSHDQYYGVPTLEELGKSSSDCGPLLPFGGETE  
ALDRMERHLKKINWICNFEKPKTSPNSLSPSTTVLSPYLKFGCLSPRLFYHRLQQVYSGKKHSQPPVSLHGQL  
LWREFFYTAVTPNFDRMKGNPVCQRQIPWGSKEPHLEAWTEARTGYPFIDAVMTQLRLEGWIHHLARHAVAC  
FLTRGDLWVSWEQGMKVFEELLLDADWSL NAGNMMWLSASAFFHQYFRVYSPVAFGKKTDPNGDYLRKYLPLV  
KKFPAKYIFEPWLAPSSVQQAAGCIVGKDYPRPIVDHDRARQENIKMAAAYAAAKSSNEGSPVKTSGGGKKK  
LSTELDKQPNKKLKK

>Apolygus\_luc\_KAF6198971.1\_GE061\_0069

MQPNLLGAPTSQSPALRFGCLSIRRFYWLTHDLFREMYGDMPSLSQSVTGQLIWREYFYTMSVDNPPYAEMER  
NPICLKINWLSRTDPTYQKKLDSWKNMGMTGYPFIDAVMRQLQAEWINHVARNVAVACFLTRGNLWISWEDGLQ  
HFLKYLLDADWSVCAGNWMYVSSSAFEQLLDCSYCICPVNFGRRLDPYGEYVK

>Apolygus\_luc\_KAF6206655.1\_GE061\_0178

MAPCCSRQEIRDIVTPPRDWIFPRAVTLRSHVFHPTTLPFVSVANFVSAVFPEKSLQLTAFLGWHCFMCYSDS  
PKRVTSLSLPTIEINDILDCLGNNNLIQLRGLRLHNDPNSLQGLSNATTFCIFILDPWFAGSSNVGINKWRFL  
LQCLDDLDRSLRKLNSRLFVIRGQPADILPKLLKEWGTCLSFEEDEPEPFGRVRDQNI IALCRSMNITVHTSV  
AHTLYKLEAIIIEKNHGKAPLTYHQFGIISMDPPPQPEPPVTLATIGRAKSI IREDHEDKFGVPTLEELGFD  
IEGLRPGVWLGESEALSRLERHLERKAWVASFGRPKMTPQSLHASQTGLSPYLRFGCLSTRLFYYQLNDLYR  
KIKRAIPPLSLHGQILWREFFYCAATRNPNFDRMVGNPICVQVPWDKNPEALAKWANGQTGF PWIDAIMTQLR  
EEGWIHHLARHAVACFLTRGDLWLSWEEGMKVFDELLLDADWSVNAGMWWLSCSSFFQQFFHCYCPVRFGRK  
ADPNGDYIRKYLPIKNNMPTKYIHEPWNAPENVQKAVKCVIGVDYPVPMNLHSSVAKNNIERMKQVYHQLIK  
KGPIMSSPSGNYQEKKEETIYDHNNIFATPVAPTILVKPASNIR

>Apolygus\_luc\_KAF6213161.1\_GE061\_0108

MATAVLRTSRKAISVHLHLLVRADKIFRRIYIIRMASAAKKLKISGESSSTNKEKDLFLHSVEKNRKEAAT  
SIADFKFNKNRVRVLSKEEAVADDNWALLYAQKLALKFKLSLRVCFCTLPKYMDSTIRQSMFMLRGLLEEVNAE

LKQLDIPFHLLYSNNKEEVAQNVLNLVDDHDVGCVVVDFSPLKIARAWVDDLKEILPKDIPLCEVDAHNIIVPC  
WVASDKLEYGARTIRNKINSKLGFLTKFPPLIQHPYPVDKHSWSINWEDEAKKFEVDRTVEEITWAQPGYQA  
GMKTLHEFCEKRLRNRFATKRNNPLVNALSNSLPWYHFGQISIQRCILHVNTFKSKYNESVNAFCEESIVRREL  
ADNFCFYNAKYDKIDGAYDWAKKTLNDHKKDKRTYVYSCDELASSKTHDDLWNSAQIQLVKEGKMHGFLRMYW  
AKKILEWTPSPPEALRIALYLNDRFSIDGRDPNGFVGCMMWSICGIHDQGWREIREIFGKIRFMNYDGCKRKFDV  
PAFVARYGGKVYKPSKK

>Apostichopus\_jap\_PIK34639.1\_putative\_c

MIIVTFAFMIAVSVNAFVTPSLFLLDCLEDLDKSLRKLNSRLFLVRGQPADVFPRLLEKWSITHLSFEEDCE  
PYGREKDQVIKALAQEAGVEVLRLNNNEPPLTYSRFQEIVSIIIGPPEHPVAPVTAQDVEGVDMAIASDHYEY  
GIPSLEELGFDTENIPVKVWVGGETEALQRLNRHLERKAWVANFERPRMSPIALNPSPTSLSPYLRFGLSSR  
MFYWELTDLFIKRTNKIPLSLHGQLLWREFFFSVGCNNPNLDQMENNPICIQIPWDRNPDYLRWAEGKTGF  
WIDAIMTQLRLEGWIHPLARHAIACFLTRGDLWISWEEGVKVFEEELLDADWSVNAGNWIWLSCSSFYQQFFH  
CYCPVKFGRRTDPEGEFIRKYLPLVKNMPTKYIFDPWTAPVEVQEEAKCIIIGKHYPAPIVNHAESHTNIEKM  
KKVFKNISKYCGPGALKIDLDNFIFNKIFEFNILVQGRLTMLIKSNVWKNKSYVSPVNTQKEAPKETDTS  
MQQQNVIQQVQKVYSSPVDMMKMPGMSHSQGGDQQRQVNFMGNIQIGLAGSRVTQMSNLQGMGHSFFS

>Apostichopus\_jap\_PIK41746.1\_6-4\_photol

MKHHSVHWFRKGLRLHDNPSLIAALKSSRKIWIPIFILDPHFVKSGTVGINRWRFLLESMDLDRSFQELGSRL  
FVIRGSPAIEVFPKIFKDWEISQLTFEIDTEPYARQDSEVIKLAEEHEVKVVQTVSHTLFDSEKIIKANGGK  
PLTYQRMQTVLSKMGPSEPMAAPTKEFTECKTPEESDHSSKYGVPTLEDLGLSTEGISPVIFPGGETEALN  
RMERYLARDKWVCNFEKPKTSPNSLKASTTVLSPYLKFGCLSVRSFYIYQAVYSGKTHSKPPVSLHGQLLWR  
EFFYTAAAGTPNFHQMKGNPVSLQIPWDENRAFLDAWTWFTLQSVYELVAFPPVALIDDLLSTDTSIAGRQNW  
LPIHRCYYDAIRKEGWIHHLARHAVACFLTRGDLWISWEEGERVFEELLDADYSLNAGNWMWLSASAFFHQY  
FRVYSPIVFGKKTDPNGDYIKKYLPIPKKFPKYIYEPWVAPRSMQEQAGCIIIGEDYPKPIVDHATISKKNIS  
RMKEARANQLGTEGKSASTAKDGKRKFDDASDEKPPPSTKSKRDSKKQKKLTQFMKK

>Apostichopus\_jap\_PIK43288.1\_putative\_c

MQSINSVARQYIDQSKYICNPLVDWKNYQSECQLPNLVEEIVICVLRNDLRYHDNEVLLWAHNNADHVLPIYC  
FDPRHYEGTWHFNFPKTGPFRLKFLLLESGLDLRSILKKAGSGLIVRRGEVEKVVPDLIQTIGKSNVHAVAQF  
EVTKEELDVQTAIVKNLAGTGIIKIWGSTLFHKDDIPFKSDRVPDVFTFEFRKRCEGGATIRSTLQMPDQFRPL  
PPGIEEGLNPTMEDLGQAAPVNDSTAFPFKGGETTGLDRIQQYFWGSNNISTYKETRNLIGSEYSTKFSTW  
LAHGCLSPRKIYEEVKKYERQRTSNQSTYWVIFELIWRDYFKFVALKFGDRLFYLHGLMGVRKPWKRDQRLFD  
AWKDGRTGVFVDSNMRELKSTGFMSNRGRQNVASFLTDLGLDWRGAEWFEYLLVDHVCNSNYGNWLYSAG  
VGNDPRQDRKFNMVQGLDYPQGDYIRQWIPELNTIRDGSVHTPWTLTSLGALRQSEVSLGETYPNPVKAPE  
WNRHSHRNKGGNRGASGGGRGKGHSGRGKQRMDFYFSSSQKK

>Apostichopus\_jap\_PIK55338.1\_putative\_c

TQLCGFNRWQFLHDCLKDIDDQFRAEGGMLYCFEGDPTFVLKQFLEWNVVLCFEQDPEPIWQERDNKVKEL  
CKEMGVQCIEQVSHTLWNPLTVISENGGSPPLTYSLFIEVVQIRIGSPPKPLKTPNPAKWKCIPKTEEADRSYK  
LKPLQYFACQEMAGQEKRWTTGETRALDLYEMRLKYEHEGFKSDIVMINQFNPKLLDPPLSLSPYLRFGALS  
IRKFYWGIEIYEEVKCTSAQNHVTAQLIWRIFYTMSVNNITYFDKMEKNPICLRINWYQDEEKLKAWTDGET  
GYPWIDACMKQLRMEGWIHQVARHAVACFLTRGDLWISWEEGLQVFYKYLLDADYSVCSGNWMMVSSSAFEKF  
LQCPSCFCPVNYGRMDPQGHFVKKYIPALAKMPLKYLFPWTAPPEFLLTADHPRRRGAEFALWDPVPDVKC  
EASDNCKKAEMYHK

>Apostichopus\_jap\_PIK56101.1\_photolyase

MADTDKGQKRQAEADNGTTEKKLKADTEQASQSLLSKVAHFRECAASIADFNFNKKRVKVSVDVKDMPEEN  
EGILYWMMDRQVRQDNWAMLYAQRLALKQEVPLHVCFCCLDPSNLLPLRHHSFMLNGLKEVEQELSKLDISFHL  
LIGETAETIAKFVGEKKIGGLVADFSPLRKPQEWVQDVAKAIPKNIPFCQVDAHNIIPCWVTSEKLEYAARTI  
RPKVHKQLGSFLTEYPPVTVHPHKATTKEHVNWDEPMNDQKIDRSITEVDWATPGSTAAMDMLSEFVKERLK  
VFATERNDPTKEALSNI SPWLHFGQIAAQRCVLVVKQFKNKYKESVDSYTEELVVRRELAENFCFYNEKYDSI  
EGTNEWAKKTLEVHAGDERKYVYTKQFEEGKTHEDLWNAQTQLVQEGKMHGFLRMWAKKILEWSKSPQEA  
LNIAIHLNDKYSLDGRDPNGYTGCMMWSICGIHDQGWAERDVFGKVRYMNYEGCKRKFDVDLFFVRRYKAKMN

>Apteryx\_mantelli\_mantelli\_XP\_013814986.1\_PREDICTED:

RFLQLSLEDLDLSRLKSSRLFVVRGQPTDVFPRLFKEWGVTRLTTFEYDSEPFGERDAAIVKLAKEAGVEVV  
IENSHTLYDLDRIIELNGHKPPLTYKRFQAIISRMELPKKPVSSIIISQOMETCKVDIQENHDDVYGVPSLEEL  
GFPTDGLAPAVWQGETEALARLDKHLERKAWVANFERPRMNANSLASPTGLSPYLRFGLSCRLFYRLWE  
LYKKVKRNSTPPLSLYQLLWREFFYTAATNNPKFDRMEGNPICIQIPWDRNPEALAKWAEKGTGFPPWIDAIM  
TQLRQEGWIHHLARHAVACFLTRGDLWISWESGVRVFEELLDADFSVNAGSWMWLSASAFFQQFFHCHYCPVG  
FGRRTDPSGDYVKRYLPKLKGFPSRYIYEPWNAPEVQKAAKCIIGVDYPKPMVNHAETSRLNIERMKQIYQQ  
LSRYRGLCLLASVPCVEDLSGQVADPALGQSSSTSTVMRLPQSDQASPKRKHEGAEELCTEELYKRAKVGGLP  
TPEIPGKSL

>Apteryx\_man\_XP\_013799507.1\_LOW\_QUALIT

MSHCTIHLFRKGLWLHDNPTLLAALESSEVVYPIYILDRQFMTQXXTXGHFLLQSLENLQKNMLQLDSCLLVI  
QVECESVLXDHVKKWNITQVTLDAEMEPFYKEMEANIQSLGEELGFAVLSLIGHSLYDAKRILDNLGGTPPLT  
YKRFPHILSR LGDPEVPVRNLAAEDFQRCRPPDLCLAE CYRVPLPVDLEIPTKSLFRWKGGETEGLLRLEQHL  
LNQGWVASFTKLRTIPNSLLPSTTGLSPYFSLGYLSVRTFFYRLSNIYAQSKHRSLPPVSLQGQLLWREFFYM  
VASATPNFTKMAGNPICLQINWYEDA EKLHKWKT AQTGFPWIDAMMTQLRQEGWIHHLARHAAACFLTRGDLW  
ISWEEGMKVFEEMLLDADYSINAGNWMWLSASAFFHQYTRIFCPVRFGKRTDPEGQYIRKYLPI LKNFPSKYI  
YEPWTASEEEQKEAGCIAGQDYSFPMANHKEVSDHNLQLMEQVREEQYRTAQLTRDDADDP MEMKIKRDHSEE  
NVKKGKVARTTEQT

>Apteryx\_man\_XP\_013803208.1\_cry-1\_X1

MNLQGLRFLQLQCLEDLDANLRKLN SRLFVIRGQPADVFPR LFKEWNI AKLSIEYDSEPF GKERDAAIKKLASE  
AGVEVIVRISHTLYDLDKIIELNGGQPPLTYKRFQTLISRMEPLEMPVETITPEVMEKCTTPVSDDHDEKYGV  
PSLEELGFDTDGLPSAVWPGGETEALTRLERHLERKAWVANFERPRMNANSLLASPTGLSPYLRFGCLSCRLF  
YFKLTDLYKKVKKNSSPPLSLY GQLLWXXXXXXXXYTAATNNPRFDKMEGNPICVQIPWDKNPEALAKWAEGR TG  
FPWIDAIMTQLRQEGWIHHLARHAVACFLTRGDLWISWEEGMKVFEELLLDADWSVNAGSWMWLS CSSSFFQ QF  
FHCYCPVGFGRRTPNGDYIRRYLPVLRGFP AKYIYDPWNAPE SVQKAAKCIIGVNYPKPMVNHAEASRLNIE  
RMKQIYQQLSRYRGLGLLATVPSNPNGNGGGLMGYSPGENISACGSTGGAQLGTGDGHTVGVQTCALGDSHT  
GASGIQQQGYCQASSILHYAHGDNHQSHLLQTGR TSLGTGISAGKRPNPEEETQSIGPKVQRQSTN

>Apteryx\_man\_XP\_013814739.1\_photolyase

MPQKKGKRKAGQGGEPEAE PDAT ELPRLSPKRSKKEAAMKKLEEAVQEARRKAAPSVQEFKY NKKRVRLISQG  
SDLKDNAKCILYWMSRDQRVQDNWAFLYAQR LALKQELPLHACFCLVPKFLDATIRHYGFMLRGLQEVAEECT  
ELNIPFHLLGLYAKDVLPTFVVRHGVGGVVTDFCPLRVPQQWVEDVRERLPEDVPFAQVDAHNIVPCWVTS PK  
QEYSARTIRSKIHSQLPEFLTEFPPIQHPPYSTPAEPIAWEACYSSLQVDCTVKEVEWATPGTAAGLAVLQ  
SFIAERLKSFGSHRNDPNKAALSNLSPWFHFGQVSTQRAILQVQKHKRKYKESVDIFVEEAVVRRELADNFCY  
YNKNYDSVQGAYDWAQTTLKLHAKDKRPFLYELQELEQGNT HDLLWNAQLQMVREGKMHGFLRMYWAKKILE  
WTRSP EEALQFAIYLNDRYELDGRDPNGYVGCLWSICGVHDQGWAE RAVFGKIRYMNYAGCKRKFDV VQFERR  
YAPCKLNK

>Apteryx\_rowi\_XP\_025912603.1

MNLQGLRFLQLQCLEDLDANLRKLN SRLFVIRGQPADVFPR LFKEWNI AKLSIEYDSEPF GKERDAAIKKLASE  
AGVEVIVRISHTLYDLDKIIELNGGQPPLTYKRFQTLISRMEPLEMPVETITPEVMEKCTTPVSDDHDEKYGV  
PSLEELGFDTDGLPSAVWPGGETEALTRLERHLERKAWVANFERPRMNANSLLASPTGLSPYLRFGCLSCRLF  
YFKLTDLYKKVKKNSSPPLSLY GQLLWREFFYTAATNNPRFDKMEGNPICVQIPWDKNPEALAKWAEGR TGFP  
WIDAIMTQLRQEGWIHHLARHAVACFLTRGDLWISWEEGMKVFEELLLDADWSVNAGSWMWLS CSSSFFQ QFFH  
CYCPVGFGRRTPNGDYIRRYLPVLRGFP AKYIYDPWNAPE SVQKAAKCIIGVNYPKPMVNHAEASRLNIERM  
KQIYQQLSRYRGLGLLATVPSNPNGNGGGLMGYSPGENISACGSTGGAQLGTGDGHTVGVQTCALGDSHTGA  
SGIQQQGYCQASSILHYAHGDNHQSHLLQTGR TSLGTGISAGKRPNPEEETQSIGPKVQRQSTN

>Apteryx\_rowi\_XP\_025919553.1

MSHHTIHLFRKGLRLHDNPTLLAALESSEVVYPIYILDRQFMTQXXTPGHFLLQSLENLXKNMLQLDSCLLVI  
QVECESVLXDHVKKWNITQVTLDAEVEPFYKEMEANIQSLGEELGFAVLSLIGHSLYDAKRILDNLGGTPPLT  
YKRFPHILSR LGDPEVPVRNLAAEDFQRCRPPDLCLAE CYRVPLPVDLEIPTKSLFRXKGGETEGLLRLEQHL  
LNQGWVASFTKLRTIPNSLLPSTTGLSPYFSLGYLSVRTFFYRLSNIYAQSKHRSLPPVSLQGQLLWREFFYT  
VASATPNFTKMAGNPICLQINWYEDA EKLHKWKT AQTGFPWIDAMMTQLCQEGWIHHLARYAAACFLTRGDLW  
ISWEEGMKVFEEMLLDADYSINAGNWMWLSASAFFHQYTRIFCPVRFGKRTDPEGQYIRKYLPI LKNFPSKYI  
YEPWTASEEEQKEAGCIAGQDYPFPMANHKEVSDHNLQLMEQVREEQYRTAQLTRDDADDP MEMKIKRDHSEE  
NVKKGKVARTTEQT

>Apteryx\_rowi\_XP\_025921631.1

MNRAQLKRPGILRMALGGSAADPLL PADGGEGRPA PFLLRALRIAVVVCLYWFTSITMVFLNKYLLDSPSLRL  
DAPLFVTFFQCAL TATLCLGLSLGAACGPPGCPDLPALRLDPKVSRSVLPLSAVFIGMITSNLCLKYGVGAF  
YNVGRSLTTVFNVLLSYLLLKQTTSLYALLACGIIIGGFWLGVDQEGAEGTLSWAGIFFGILASLCVSLNAIY  
TKKVLPPVDGSIWRLTFYNNVNACVLFPLPLMMLLGEFHTLYHFDKLGSPSFWGMMTLGGVFGFAIGFLLQSLE  
DLDNSLRKLSSRLFVVRGQPTDVFPR LFKEWGVTRLTFEYDSEPF GKERDAAIVKLAKEAGVEVVIENSHTLY  
DLDRIIELNGHKPPLTYKRFQAIISRME LPKKPVSSIISQQMETCKVDIQENHDDVYGVPSLEELGFPTDGLA  
PAVWQGETEALARLDKHLERKAWVAN YERPRMNANSLASPTGLSPYLRFGCLSCRLFY YRLWELYYKKVKRN  
STPPLSLY GQLLWREFFYTAATNNPKFDRMEGNPICIQIPWDRNPEALAKWAEKGTGFPWIDAIMTQLRQEGW  
IHHLARHAVACFLTRGDLWISWESGVRVFD ELLLDADFSVNAGSWMWLSCSA FFQQFFHCYCPVGFGRRTPDS  
GDYVKRYLPKLKGFPSRYIYEPWNAPE SVQKAAKCIIGVDYPKPMVNHAETSRLNIERMKQIYQQLSRYRGLC  
LLASVPCVEDLSGQVADPALGQSSSTSTVMRLPQSDQASPKRKHEGAEEELCTEELYKRAKVGGGLPTPEIPGKS  
L

>Apteryx\_rowi\_XP\_025926657.1

MAEEVMFLFTGVAYHHTTPARLVIPFATAWSR PWRLQYLSQHCPPTRTVLGMPQKKGKRKAGQGGEPEAE PD  
TELPRLSPKRSKKEAAMKKLEEAVQEARRKAAPSVQEFKY NKKRVRLISQGS DLKDNAKCILYWMSRDQRVQD

NWAFLYAQRLALKQELPLHACFCLVPKFLDATIRHYGFMLRGLQEVAEECTELNIPFHLLLLGYAKDVLPTFVV  
RHGVGGVVTDFCPLRVPQQWVEDVRERLPEDVPFAQVDAHNIVPCWVTSPKQEYSARTIRSKIHSQLPEFLTE  
FPPVIQHPYPSTPAEPIAWACYSSSLQVDCVKEVEWATPGTXAGLAVLQSFIAERLKSFGSHRNDPNKAAL  
SNLSPWFHFGQVSTQRAILQVQKHHRKYKESVDIFVEEAVVRRELADNFCYYNKNYDSVQGAYDWAQTTLKLH  
AKDKRPFLYELQELEQGNTHDLLWNAAQQLQMVREGKMHGFLRMYWAKKILEWTRSPPEALQFAIYLNDRYELD  
GRDPNGYVGCLWSICGVHDQGWAERAVFGKIRYMNAGCKRKFDVVQFERRYAPCKLNK

>Apteryx\_rowi\_\_XP\_025947336.1

KYGRRISLRLGLQGKEVPWKKDLQLFDCWKEGKTGVPFVDANMQELAATGFVSNRGRQNVTSFLTKEGLDWR  
MGAEFECLLVDYGICSNYGNWLYSTGIGNDPRDNRKENTIRHGLDYGGGDXVRLRVPQLQGIKGGDIHTPW  
ALSSASLSQAGTTLGETYPWPVVTAPWESRRISKGPQGRGPHPKGRKGAHTPMQHKDRGMDFYFSHKKDI

>Aquila\_chry\_chrysaetos\_XP\_029852375.1

MAAAALGPAPASAPALCRSVHWFRRGLRLHDNPALQEAELRDAESLRCIYILDWFAASSAVGINRWRFLQ  
SLEDLNSLRKLNRLFFVVRGQPTDVFPRLFKEWGVTRLTFEYDSEPFGERDAAIVKLAKEAGVEVVIENSH  
TLYDLDRIIELNGHKPPLTYKRFQAIISRMELPKPKPVSTVISQQMETCKVDIQENHDDVYGVPSSLEELGFPTD  
GLAPAVWQGGETEALARLDKHLERKAWVANYERPRMNANSLLASPTGLSPYLRFGLSCRLFYRLWELYKKV  
RQKPPPLSLYGLLWREFFYTAATNNPKFDRMEGNPICIQIPWDRNPEALAKWAEKGTGFPWIDAIMTQLRQ  
EGWIHHLARHAVACFLTRGDLWISWESGVRVFDLDDADFSVNAGSWMWLSCSAFFQQFFHCYCPVGFGRRT  
DPSGDYVKRYLPKLKGFPSTRYIYEPWNAPEVQKAAKCIIGVDYPKPMVNAHETSRLNIERMKQIYQQLSRYR  
GLCLLASVPSCVEDLSGPVTDASAGQGCSNTAMRLSQADQASPKRKHEGAEEELCTEELYKRAKVTGLPTPEI  
PGKSL

>Aquila\_chry\_chrysaetos\_XP\_029856377.1

MPHRTIHLFRKGLRLHDNPALLAALECEVLYPVYILDRKFMTSVMHIGTLRWHFLLQSLEDLQKNLYKLGSC  
LLVIQGEYESVLRDHIQKWNITQVTLDAMEPFYKEMEANIRRLGEELGFEVLSLVGHSLYNTKRILDLNSGT  
PPLTYKRFHLHLSLLGDPEVPVRNLTAEDFQKCRPPDLGLAECYRVPLPVDLKITAASLSPWRGGETEGLQRL  
EQHLTQGWVASFTKPRITPNSLLPSTTGLSPYFSMGCLSVRTFFYRLSNIYAQAKHSLPPVSLQGQLLWRE  
FFYTVASATPNFTKMAGNPICLQISWYEDAERLHKWKAQTGFPWIDAIMTQLRQEGWIHHLARHAVACFLTR  
GDLWISWEEGMKVFEELLLDADYSINAGNMMWLSASAFFHQYTRIFCPIRFGKRTDPEGQYIRKYLPIKLNFP  
SKYIYEPWTATEEEQKQAGCIIGQDYPPFMVNHKEASDHNQLMKQVREEQYRTAQLTRDDSDDPMEMKVKRD  
HSEENVSKGKVARMTQTKIPSGITHWEPKNGKRGEPEAS

>Aquila\_chry\_chrysaetos\_XP\_029865135.1

MSGAARTAICLLRCDLRAHDNQVLHWAQSNADFIPLYCFDPRHYVGTPCYGFPKTGPHRLRFLLESVKDLRE  
TLKKKGSTLVVRKGKPEDVVCDLITQLGSVSAAVVFHEEATQEELDVETELCQVCSQHGVKIHTFWASTLYHRD  
DLFPRPIARLPDVYTHFRKAVESEAKVRPTLRMADQLKPLAPGVEEGCIPTMEDLGQKDPVTDPRTAFFPCSGG  
ERQALMRLQYYFWDNLVASYKETRNLVGM DYSTKFAPWLALGCISPRYIYEQIQKYEKERTANQSTYVWLF  
ELLWRDYFRFVALKYGRRIFFSLRGLQNKEVPWKKDLQLFDCWKEGKTGVPFVDANMRELAATGFMSNRGRQNV  
ASFLTDLGLDWRMGAEFKYLVDYDVC SNYGNWLYSAGIGNDPRENKFNMIKQGLDYDSNGDYVRLWVPE  
LQGIKGADIHTPWALNSAALSQAGVSLGETYPQPVVTAPWESRHINQKPQGRSPHPRGRGPAHTPMQHKDRG  
IDFYFSHKKDV

>Aquila\_chry\_chrysaetos\_XP\_029878270.1

MSYIYQTRHFFPPKIHPHLSFPRLHPPTPPAMQHSSIHWFRKGLRLHDNPALLAAATDCRHLHPLFILDPS  
SRAGTNAWRFLLDALRDLGSLQEMGSRLFFVQGCPEEVFPCLFHAWGTTRLTFEVDTEPSARRRDATAKLA  
ERHGVEVIQEVSHTLTYDTERVLALNDGKAPLTYKGLQSLLASLGPPEKPAPTLTLEHLQGCHTPCQVSHDTEY  
GVPTLEELGQDPTEVGPHLYPGGERAALARNALMDRTAWLCSFKKPETEPTSLSPSTTVLSPYLKFGCLSVR  
TFWWWLHEVYQGREHSQPPVSLHGQLLWREFFYTAGAGIPNFRMVSNPICLQVDWDNNPQHRLRAWREGQTY  
PFIDAIMTQLRTEGWIIHHLARHAVACFLTRGDLWISWEEGLKVFEELLLDADWSLNAGNWLWLSGSAFFHRYF  
HIYSPVAFGKKTD RDGAYIRKYL PVLKDFPAKYIYEPWKAPRAVQEAGCLVGTHYPPAHRGARGGEQEESSGA  
HEGGRPRERHQAGTTSWPLSS

>Aquila\_chry\_chrysaetos\_XP\_029885129.1

MRRQGKRKAEVRELPRVSRRRKEEEEEAVQEARRRAAPSVREFKYNNKRVRLVSQGSDLKADARCILYWMRSR  
DQRVQDNWAFLYAQRLALKQELPLHVCFCCLVPKFLDATIRHYGFMLRGLQEVAEECEGELNIPFHLLLLGYAKDV  
LPMFVVEHGVGLVTDVFCPLRLPRQWVEDVRERLPEDVPFAQVDAHNIVPCWVASPKQEYSARTIRGKIHAQL  
PEFLTEFPPIRHPYPSPCAEPVAWEACYSSSLQVDHTVKEVEWATPGTAAGLAMLQSFIAERLKSFGSHRND  
PNKAALSNLSPWFHFGQVSTQRAILEVQKHGRKYKESVDAFVEEAVVRRELAENFCYYNENYDSVQGAYDWAQ  
TTLKLHAKDKRPFLYKLVSTQTHDPLWNAAQQLQMVREGKMHGFLRMYWAKKILEWTRSPPEALQFAIYLN  
DRYELDGRDPNGYVGCLWSICGIHDQGWAERAIIFGKIRYMNAGCKRKFDVGVQFERRYTPRTLQ

>Aquila\_chry\_chrysaetos\_XP\_029895934.1

MGVNAVHWFRRKGLRLHDNPALRECIEGADTVRCVYILDWFAAGSSNVGINRWRFLQCLLEDLDANLRKLNRL  
FVIRGQPADVFPRLFKEWNIAKLSIEYDSEPFGERDAAIKKLASEAGVEVIVRISHTLYDLDKIIELNGGQ  
PLTYKRFQTLISRMPELMPVETITPEVMEKCTTPVSDHDEKYGVPSLEELGFDTDGLPSAVWPGGETEALT  
RLERHLERKAWVANFERPRMNANSLLASPTGLSPYLRFGLSCRLFYFKLTDLYKKVKNSSPPLSLYGLLW

REFFYTAATNNPRFDKMEGNPICVQIPWDKNPEALAKWAEGRGTGFPWIDAIMTQLRQEGWIHHLARHAVACFL  
TRGDLWISWEEGMKVFEELLLDADWSVNAGSWMWLSCSSFFQQFFHCYCPVGFGRRTDPNGDYIRRYLPVLRG  
FPAKYIYDPWNAPESVQKAAKCMIGVNYPKPMVNHAEEASRLNIERMKQIYQQLSRYRGLGLLATVPSNPNGNG  
NGGLMGYSPPGESISGCGSTGGAQLGTGDGHTVVQPCALGDSHTGASGIQQQGRALTGTGISAGKRPNPPEETQ  
SVGPKVQRQSTN

>Arabidopsis\_tha\_PHR2\_NP\_182281.1

MDSSNVEENLNPETKSAAEQNPLAIFHSSLPIASLSLTLFPSSTQFLKLFAPHPNKVKIPTQASSLTHLSLSS  
VSPFPSSRISFKSTIAANPLQSPISIVPRRPVDPSSAAALRRAAVVWFRNDLRLHDNECLNSANDECVSVLV  
YCFDPRDYGKSSSGFDKGTGPFRAQFLIESVSELRKNLQARGSNLVVRVVGKPEAVLVELAKEIGADAVYAHREV  
SHDEVKAEGKIETAMKEEGVEVKYFWGSTLYHLDDLFPFKIEDLPSNYGGFKDKVQKLEIRKTIAALDQLKSLP  
SRGDVELGDIPSLDLGLISPTPRTSQEGKPTMVGGETEALTRLKSFAADCQARLSKGNQKGGNNSVFGANFSC  
KISFWLAMGSISPRSMFDELKKTISASTTTTTTPRNGPGDTGLNWLMYELLWRDFFRFITKKYSSAKTQVEAGP  
ATACTGAFA

>Arabidopsis\_tha\_AAL16379.1\_cry\_2

MKMDKKTIVWFRRLRIEDNPALAAAHEGSVFVFIWCPEEEGQFYPPGRASRWMKQSLAHLQSLSKALGSD  
LTLIKTHNTISAILDCIRVTGATKVVFHNLYDPVSLVRDHTVKEKLVERGISVSSYNGDLLYEPWEIYCEKKG  
PFTSFNSYWKCLDMSIESVMLPPPWRMLPITAAAEAIWACLIEELGLENEAEKPSNALLTRAWSPGWSNADK  
LLNEFIEKQLIDYAKNSKKVVGNSTSLSPYLHFGIEISVRHVFCARMKQIIWARDKNSEGEESADLFLRGIG  
LREYSRYICFNFPFTHQSLLSHLRFFPWDADVDKFKAWRQGRGTGYPLVDAGMRELWATGWMHNRIRVIVSSF  
AVKFLLLPWKWMKYFWDTLDDADLECDILGWQYISGSIIPDGHELDRLDNPALQGAKYDPEGEYIRQWLPELA  
RLPTEWIIHPWDAPLTVLKASGVELGTNYAKPIVDIDTARELLAKAISRTREAQIMIGAAPDEIVADSFEALG  
ANTIKEPGLCPSVSSNDQQVPSAVRYNGSKRVKPEEEEEERDMKKSRRGFDERELFSTAESSSSSSSVFFVSQSCS  
LASEGKNLEGIQDSSDQITTSLGKNGCK

>Arabidopsis\_tha\_NP\_566520.1\_DNA\_photol

MQRFCVCSPSSYRLNPITSMATGSGSLIWFRRKGLRVHDNPALAYASKGSEFMYPVFVIDPHYMESDPSAFSPG  
SSRAGVNRIRFLLESKLDLDSSSLKLGSRLLVFKGEPGEVLVRCLQEWKVKRLCFEYDTPYYQALDVKVKDY  
ASSTGVEVFSPVSHTLFNPAAHIEKNGGKPLPSYQSFLKVAGEPSCAKSELVMSYSSLPPIGDIGNLGISEVP  
SLEELGYKDDEQADWTPFRGGGESEALKRLTKSISDKAWVANFEKPKGDPSAFLKPAITVMSPYLFKFGCLSSRY  
FYQCLQNIYKDVKKHTSPPVSLLGQLLWREFFYTAFGTNPFDMKGNRICKQIPWNEDHAMLAAWRDGKTGY  
PWIDAIMVQLLKWGMHHLARHCVACFLTRGDLFIHWEQGRDVFERLLIDSDWAINNGNMMWLSCSSFFYQFN  
RIYSPISFGKKYDPDGKYIRHFLPVLKDMPKQYIYEPWTAPLSVQTKANCIVGKDYPKPMVLHDSASKECKRK  
MGEAYALNKKMDGKVDENLRDLRRLKQKDEHEESKIRNQRPKLK

>Arabidopsis\_tha\_NP\_567341.1\_cry\_1

MSGSVSGCGSGGCSIVWFRDLRVEDNPALAAAVRAGPVIALFVWAPEEEGHYHPGRVSRWWLKNSLAQLDSS  
LRSLGTCLITKRSTDSVASLLDVVKSTGASQIFFNHYLDPLSLVRDHRADVLTAQGIIVRSFNADLLYEPWE  
VTDELGRPFMSMAAFWERCLSMYPDPESPLLPKKIISGDVSKCVADPLVFEDDSEKGSNALLARAWSPGWSN  
GDKALTTFINGPLLEYSKNRRKADSATTSFLSPHLHFGEVSVRKVFHLVRIKQVAVANEGNEAGEESVNLFK  
SIGLREYSRYISFNHPYSHERPLLGHKLFFPWAVDENYFKAWRQGRGTGYPLVDAGMRELWATGWLHDIRVVV  
SSFFVKVLQLPWRWGMKYFWDTLDDADLES DALGWQYITGTLPDSREFDRIDNPQFEGYKFDPNGEYVRRWLP  
ELSRPLTDWIIHPWNAPESVLQAAGIELGSNYPLPIVGLDEAKARLHEALSQMWQLEAASRAAIENGSEELG  
DSAEVEEAPIEFPRDITMEETEPTRLNPNRRYEDQMVPSITSSLIIRPEEDEESSNLNRNSVGDSRAEVPNRMV  
NTNQAQQORRAEPASNQVTAMIEFNIRIVAESTEDSTAESSSSGRRERSGGIVPEWSPGYSEQFPSEENGIGG  
GSTTSSYLQNHHEILNWRRLSQTG

>Arabidopsis\_tha\_OA096306.1\_CRY3

MNDHIHRVPALTEEEIDSVAIKTFERYALPSSSSSVKRKGKGVITILWFRNDLRLVDNDALYKAWSSSDTILPVY  
CLDPRLFHTTHFFNFPKTGALRGGFLECLVDLRKNLMKRGNLNLLIRSGKPEEILPSLAKDFGARTVFAHKET  
CSEEVDERLVNQGLKRVGNSTKLELIWGSTMYHKDDLFPDVFDPDVTQFRKSVEAKCSIRSSTRIPLSLG  
PTPSVDDWGDVPTLEKLGVEPQEVTRGMRFTVGGESAGVGRVFEYFWKKDLLKVYKETRNGMLGPDYSTKFSW  
LAFGCISPRFMYEEVQRYEKERVANNSTYWVLFELIWRDYFRFLSIKCGNSLFHLGGPRNVQGWKSDQKLFE  
SWRDAKTGYPLIDANMKELSTTGFMNSNRGRQIVCSFLVRDMGLDWRMGAWEFETCLLDYDPCSNGNWTYAG  
VGNDPREDRYFSIPKQAQNYDPEGEYVAFWLQQLRRLPKERHFPGRMLMYMDTVVPLKHGNGPMAGGSKSGG  
FRGSHSGRRSRHNGP

>Arabidopsis\_tha\_OAP18495.1\_UVR2

MASTVSVQPGRIILKKGSWQPSDQTVGPVVYWMFRDQRLKDNWALIHAVDLANRTNAPVAVVFNLFQFLDA  
KARQLGFMLKGLRQLHHQIDSLQIPFLLQGDAKETIPNFLTCEGASHLVTDFSPLEIRRCKDEVVKRTSDS  
LAIHEVDAHNVPMWAASSKLEYSARTIRGKINKLLPDYLIIEFPKLEPPKKKWTGMMDKKLVDWDSLIDKVVR  
EGAEVPEIEWCVPGEDAGIEVLMGNKDGFLTTRKLNKYSTDRNNPIKPKALSGLSPYLHFGQVSAQRCALEARK  
VRSTSPQAVDTFLEELIVRRELSDNFCYYQPHYDSLKGAWEWARKSLMDHASDKREHIYSLEQLEKGLTADPL  
WNASQLEMLYQGMHGFMRMYWAKKILEWTKGPEEALSISIIYLNKYEIDGRDPSGYVGCMMWSICGVHDQGWK  
ERPVGKIRYMNYAGCKRKFNVDYSYISYKSLSVSVTKKKRKAEEQLTRDSVDPKITIV

>Aramus\_guar\_\_NX048908.1

MSHRTIHLFRKGLRLHDNPTLLAALESSEAIYPVYILDRRFMTSVMHIGALRWHFLLQSLEDLQONLCQLGSC  
LLVIQGEYESVLRDHIQKWNITQVTLDAMEPFYKEMEANIRCLGEELGFEVLSLVGHSLYDTERILDLSGGT  
PPLTYKRFLHILSLLDGPEVPVRNLAEDFQRCRSPDLALAECYRVPLPVDLKIPLLESLSPWKGGETEGLRRL  
EQHLTDQGWVASFTKPKTIPNSLLPSTTGLSPYFSMGCLSVRTFFYRLSNIYAQAKHHSLLPPVSLQGQLLWRE  
FFYTVASATPNFTKMAGNPICLQISWYEDAERLHKWKTATGTGFPWIDAIMTQLRQEGWIHHLARHAVACFLTR  
GDLWISWEEGMKVFEELLLDADYSINAGNWMWLSASAFFHQYTRIFCPVRFGKRTDPEGQYIRKYLPIILKNYP  
SKYIYEPWTASEEEQKQAGCIIGQDYPFPMVNHKEASDHNLQLMKQVREEQYRTAQLTRDDTDDPMETKVKRD  
HSEENVSKGKVARLTE

>Aramus\_guar\_\_NX050838.1

RFLQLQCLEDLNLRKLNLSRLFVIRGQPADVFPRLFKEWNIAKLSIEYDSEPFGKERDAAIKKLASEAGVEVI  
VRISHTLYDLDKIIELNGGQPPLTYKRFQTLISRMEPLEMPVETITPEVMEKCTTPVSDDHDEKYGVPSLEEL  
GFDTDGLPSAVWPGGETEALTRLERHLERKAWVANFERPRMNANSLASPTGLSPYLRFGLSCRLFYFKLTD  
LYKKVKKNSSPPLSLYGQLLWREFFYTAATNNPRFDKMEGNPICVQIPWDKNPEALAKWAEGRTGFPWIDAIM  
TQLRQEGWIHHLARHAVACFLTRGDLWISWEEGMKVFEELLLDADWSVNAGSWMWLSCSSFFQQFFHCYCPVG  
FGRRTDPNGDIIRRYLPVLRGFPKAYIYDPWNAPEVQKAAKCIIGVNYPKPMVNHAEASRLNIERMKQIYQQ  
LSRYRGLGLLATVPSNPNGNGGGLMGYSPEGESISGCGSTGGAQLGPGDGHTVVQPCALGDSHTGASGIQQQG  
YCQASSILHYAHGDNQQSHFLQAGRTALGTGVSAGKRPNPEEETQSVGPKVQRQSTN

>Aramus\_guar\_\_NX052292.1

VSSLRFLQLSLEDLNSLRKLNLSRLFVVVRGQPTDVFPRLFKEWGVTRLTFEYDSEPFGKERDAAIVKLAKEAG  
VEVVIENSHTLYDLDRIIELNGHKPPLTYKRFQAIISRMEPLPKPVSTVISQQMETCKVDIQENHDDVYGVPS  
LEELGFPTDGLAPAVWQGGETEALARLDKHLERKAWVANERPRMNANSLASPTGLSPYLRFGLSCRLFYF  
RLWELYKKVKRNSTPPLSLYGQLLWREFFYTAATNNPKFDRMEGNPICIQIPWDRNPEALAKWAEGKTGFPWI  
DAIMTQLRQEGWIHHLARHAVACFLTRGDLWISWESGVRVFDELLLDADFSVNAGSWMWLSCSAFFQQFFHCY  
CPVGFGRRTDPSGDYVKRYLPKLKGFPSTRYIYEPWNAPEVQKAAKCIIGVDYPKPMVNHAEASRLNIERMKQ  
IYQQLSRYRGLCLLASVPSCVEDLSGPVTDASAGQGCSTSTVMRLSQADQASPKRKHEGAEEELCTEELYKRAK  
VTGLPAPEIPGKS

>Aramus\_guar\_\_NX058702.1

KVDYDVC SNYGNWLYSAGIGNDPRDNRFNMKQGLDYDGNNGDYVRLWVPELRLGIKADIIHTPWALTSAAALSQ  
AGVTLSSETYPQPVVTAPEWSRHINQRPQGRSPHPRGSRGPAHTPVQRTGIDFYFSRKKDA

>Araneus\_ven\_GBM49213.1\_cry-1

MTSHKQKHVVHWFRLKGLRLHDQPALREGLOGATTLCRVFILD PWFAGSSNVGINKWRFLQLCLENLDSNLRKL  
NSRLFVIRGQPADVFPRLFKLWKTTHLTFEKDPEPYGRIRDHNTTTMAQENGVTVISRTSHTLYRLEKIVQKN  
GSKSPLTYKQFQNILANMEPPPPPQPRITLEDVGSCYTPISDDHDEKYGVPTLEELGFDTENLKPPVWIGGET  
EALARLERHLERKAWVASFGRPKMTPQSLLPSQTGLSPYLRFGLSARLFYQELTELYRKIKKVNPPSLHGQ  
ILWREFFYCAATNNPKFDHMGNSMCVQIPWDTNSEALAKWTNGQTGFPWIDAIMTQLREEGWIIHHVARHAVA  
CFLTRGDLWISWEEGMKVFEELLLDADWSVNAGSWMWLSCSSFFQQFFHLYCPVRFGKADPNNGDYIRRYLPV  
LKNFPTKYIHEPWVAPEKVQIAAKCVIGKDYPMMPMVNHQEVSHINLERMKQVYRQLSHYRGASMYSSSHNQQT  
NQREGDDGYPKNSKRRAVEYPEDSGQVQKRDTTLK

>Araneus\_ven\_GBM67889.1\_cry-1

MKVGPNRWRFLVQSLCDLDES LKQFNSRLFVIRGKPTFVLPDAIKRWKIKYLT FESDTEPYAKARDEEIEENLM  
RTLDVEVIKCCNTNTLYDPEKIIAFNGKVPLTYQAFVNTADKIGLPSKPVPSVDQLKDLVKEQGRSTPVEDDHD  
VKYSVPTLKELVNNESELNPNCLYPGGETEALARLERVTANQEYICKFEKPNTSPNSINPSTTVLSPYVKFGCL  
SARTFYEIRDIY LKSKKGYSKPPVSLHGQLFWREFFYTAGSATPNFDQMIGNPVCKQIPWIDNDSFLQSWAH  
AQGTGYPFIDAIMTQLRKEGWVHHLARHSVACFLTRGDLWVSWERGMKVFEELLLDADWSLNAGNWMWLSASAF  
FHQY YRVYSPIAFGKKT DKNNGDYIRKYIPVLKKFPPEYIYEPWKAPKKLQEQ LGCVIGKDYPSPIVDHDKVRV  
ENLRMDAVYKSKQENKDKDKKGPSKSKESSVSKKAPSKGKRSLDENSQVKISKFLKNK

>Araneus\_ven\_GBN19159.1\_cry-1

MSNAKFIHWFRADLRLHDVPTIT TALKSCSTFYPVYIFDENDINEQKIKYKNKVRFILDALKDID SRLQLNGGR  
LYVFKGNPAKIFSDLFKKWDISYLSYAEDVQPMWKETEKSVQEVCEQNGVKIIQEVSHTLWNLD EILNANKGQ  
PPVTYEVFCHVVEVLGT PPRPEPELKLEGISMPRDDSLMCDLPTDPEELGVHAECIQQKNKIWIGGETRAFEH  
LAERFLKVEEAALADGFFMPNQVKPDL LGPSMSLSAALSGLCSVRKFYWSLQDLHSSVNPDLCPVESLIGQLL  
WREYFLAMCKNNPNYGTMQENPICLNI PWLTDDEKLKSWTNGQTGFPFIDAAMRQMIQEGWLHHVGRNAVACF  
LTRGDLWISWEDGFKVFMKYLIDADFPVCAGNWMWVSSSAFENILQCPTCISPISYGRCFEPSGDYIRKYVPE  
LKSMPTKYIFEPWLAPLSVQE QAGCIIGTDYPYPIVNHQEA AEINGKRMDSIKAGFYQKPFPLHCAPSNALET  
RVFMWLPEKCIENLVQENN

>Araneus\_ven\_GBN22197.1\_photolyase

MSSGKQKTLDDFGKPAKKQKTEESEQNNDHEFIKEIKHSRLSTAASI QDFKFNKKRVRVLSNTKDISENAESI  
VYWMSRDQRVQDNWAFLYAQRLALKLDLPLCVCFCFLVPKFLDATIRHYRFMLKGLKEVAEECESLNIHFHLLL  
GEAKTVLPEFVKENKVGIVTDFCPLRVPRKWVSDILTKLPDDVSLCQVDAHNI VPCWIASDKQEYGARTIRR

KIHDKLKEFLTLPFPVMKQKEIANCKLQDIDWEKVENSLVNMDVKEVAWATPGTTAGLLKLSEFCSKRLLKGF  
SDLRNDPTKDNLSNLSPPWFHFGQISIQRAILTVQKFKGKYGPSVDAFVEETVVRRELADNFCYYNKNYDKVEG  
AYDWAKKTLKDHSDKREYIYTKEQLENAKTHDLLWNAAQRMTEGKMHGFLRMYWAKKILEWTNSPEEAL  
IAIYLNKYELDGRDPNGYVGCWMSICGIHQGWAERAVFGKIRFMNYKGCCRKFVNEFIRRYREK

>Archocentrus\_cent\_\_XP\_030575581.1

MVINTIHWFRKGLRLHDNP SLKESLLGADTVRCVYILDPWFAGSSNVGINRWRFLQLSLEDLDSSLRKLNSRL  
FVIRGQPTDVFPRLFKEWKITRLSYEYDSEPFQKERDAAIKKLASEAGVEVTVRISHTLYDLDKIIELNGGQS  
PLTYKRFQTLISRMDPVEVPAESITAEIMGKCTTPLSEHDKEKFGVPSLEELGFDTEGLSSAVWPGGETEALT  
RLERHLERKAWVANFERPRMNANSLASPTGLSPYLRFGCLSCRLFYFKLTDLYRKVKKNSSPPLSLYGQLLW  
REFFYTAATNNPCFDKMESNPICVQIPWDRNPEALAKWAEGRTGFPWIDAIMTQLRQEGWIHHLARHAVACFL  
TRGDLWISWEEGMKVFEELLLDADWSVNAGSWMWLSCSSFFQQFFHCYCPVGFGRRTDPNGDYIRRYLPVLRG  
FPAKYIYDPWNAPEVVQKAAKCIIGVHYPKPMVHHAESRLNIERMKQIYQQLSCYRGLGLLATVPSSSNGNG  
NGNAETSSDAMRFSETSRDAAAPSTYQMPVHSQGEWQSGVMYLGQDPQTSAGMHQHGPHEHPPTQTSGKRHS  
EDSGNGKSSKVQRQSIH

>Archocentrus\_cent\_\_XP\_030577901.1

MFLCIVFVIHMFAGMAHTCIHWFRKGLRLHDNPALMAALKDCKKLYPVFILDOPYFQNNTCVGINRWRFLIGAL  
KDLDCSLRKHNSRLFVVRGRPEDVFPKLFTKWKVTRLTYEYDTEPYSLQRDSKVTS LAKEHGVEVLYKVSHTL  
YNIDRIIEENSGKPPLTYKHLQAIVKTIGPPKRPVSAPTMDMKENHEKEYGIPALKEGLDTTTTLGEELFP  
GEQEALRRLDEHMKRTKWVCTFEKPQTSPLNSLPSTTVLSPYVTFGCLSVRTFWWRLTEVYKGNKHS DPPVSL  
HGQLLWREFFYTASLGIPNFKMEGNSVCTQVDWDTNPEYLA AWSEARTGYPFIDAIMTQLRQEGWIHHLARH  
AVACFLTRGDLWISWEEGQKVFEELLLDGDWALNAGNWQWLSASTFFHQYFRVYSPVAFGKKT DKNQDYIRKY  
LP LLKKFP AEYIYEPWKAPRRIQEVAGCIVGKDYHPPIVQHEVISKKNIQRMKLAYAKRSPDTTESPNKKQGV  
KRKAPSVIDMFKKKAKV

>Archocentrus\_cent\_\_XP\_030586440.1

MPPLGADAQATVRRWLREVLVGREDEPGEFFAVCVSILGHQETRSQFLSLIQPLSTANRLLHSSLTSIYQEYFI  
KTEEDELELALALSLLDMKDQPLQSPNQESQPLQSGDAQDQSGSVQLNPASKSEGSNCTNQTGTWKRRERQLQT  
TGNTVEVQINTYPNKEIPGTGQTVRVSEEAQDLQSQPKPKRSKNRRQRKCTGQTLVGLPCSPSALPPVLLWFR  
RDLRLCDNPALMASLEVGA PVI PVFIWSP EEEEGRGLTVAMGGACKYWLHQALLCFSSLEHIGSHLVFLKAN  
TEGDGVRSSLEALKELIKESGARTVL ANALYEPWLKERDDAVVSTLQKQGV ECRMFSYCLRDPYSVTTEGVG  
LRGIGSVSHFMNCCRQNP GSTVGVPLEPPVSLPTPAHWPKGVSLDEL DLARMPRRKDGT MIDWAVNIRKSWDF  
SEEGA HARLKAFLHDGVYRYERESGRADAPNTSCLSPYLHFGQLSPRWLLWDAKGACCRPPKFQ RKLAWRDLA  
YWQLTLFPDLPWESIRPPYKALRWSSDRGHLKAWQGRGTGYPLVDAAMRQLWQTGWMMNMYMRHVVASFLIAYL  
HQPWQEGYRW FQDTLVDADVAIDAMMWQNGGMCGLDHNFMHPVDAALTCDPYGT YVRKWCPELADLPDELI  
HKPWKCPASMLRRAGVVFQGTYPERVITDLEERNRSLQDVALVRREFEQYVDKHS GCDLVPLPRLVSEALS  
LSHRD GALVTQ GKQFLLPVI TRMEFKHQDDPDADAASNPNYAVLKG YVSRKRDETI AFLNERDFTASVMHEV  
VQRKERLNSDYRKM EGLPSPSPRGRARRTP TAKDRFSIVPGGVATSLK

>Archocentrus\_cent\_\_XP\_030586668.1

MVVNSVHWFRKGLRLHDNPALQ EALNGADTVRCVYILDPWFAGSANVGINRWRFLLEALEDL DSSLKKLNSRL  
FVVRGQPTDVFPRLFKEWNVTRLT FEYDPEPYGKERDGA I KMAQ EFGVETIVRNSHTLYNLDSRI IEMNNNS  
PPLTFKRQTI VSRLELPRRPLPLVTQE QMDKCCTKIADNH DQLYSIPSLEELGFR TDGLRPAVWRGGESEAL  
DRLSKHL DKKVWVTSLENPRVNTCSLYANPTGLSPYLRFGCLSCRVLYYNLRELYMKVRKRCSPPLSLFGQLL  
WREFFYTAATNNPNFDHMDGNPICVQIPWDQNPEALAKWAEGRTGFPWIDAIMTQLRQEGWIHHLARHAVACF  
LTRGDLWISWESGMKVFEELLLDADWSVNAGSWMWLSCSAFFQQFFHCYCPVGFGRRTDP SGDYIRHYVPILK  
DYPNRYIYEPWNAPESLQKAANCVVGVDY PKPMINHAESSRLNIERMKQVYQQLSHYRGLSLLASVPTIQEEA  
EPPMTDESQTSSGPDSPLRVPADREAAGCSEAPDSFTVCTSSTSVQHPEQADQAPCISSGSHAEP IHPPSLSS  
TLALSPLSKSKLSSPSSSCPGPSTALAQSSSLGPKRKGLNRKVRGRHRQRGRQYCTLAAREREATGGEEKMEE  
DVEQNKDRMEDDDQTSGETARQLQ

>Archocentrus\_cent\_\_XP\_030608567.1

MCCLFGYVHVLFSIRAEAAALFMALHPVCCA AFGGRFVKLAIHHHQRPSSPRLFFLTSLFTCQPTMSDKKRKAS  
CPSAGKEPRAKQQLAPVKEEKKERVAGWLQSLVQQQRTEKD IKFNKKRLRFISDTQKIRQ GSEGVLYWMLRD  
QRVQDNWALIHQAQLAAEENLPLHICFCL EVPKSELSTQRHYSFMLKGLKEVAKECKHLNIQFHLLHGAPGNV  
LPGFASDHS LGAVVTD FSP LREPLQWLEDVKKKL PQDIPFIQVDAHNIVPCWVASPKLEY SARTIRGKITNLL  
SEFLTDFPLVEKHYPYTAAGTAKEVDWDKTLASLEVDR TVEETEWAKPGTKAGMDMLESFIDVRLKLFSGQRND  
PNAPALSQLSPWLRFGQLSAQRVALQVQRSGKNAGQSI PAFIEELVVRRELT DNFCFYNKKYDSVEGAYEWAQ  
KTLKDHA KDKRPYLYTREQLEKAKTHDKLWNAAQYQMVTEGKMHGFLRMYWAKKILEWTSSPQEALSIALYLN  
DRYELDGQDPNGFVGCWMSICGIHQGWAERP VF GKIRYMNYKGCLRKFNVAQFEKTYCPKNL

>Archocentrus\_cent\_\_XP\_030612430.1

MSTSRTVICLLRNDLRVHDNELFHW AQRNAEYIVPLYCFDPRHYVGTYNYNLPKTPGFRLRFLLESIRD LRNT  
LINKGSNLVVR LGKPEDVVADLIKQLG SVSSVAFHEEVTSEELNVEKKVKEVCAQMKVRVHTCWGSTLYHRDD  
LPFPHMSRLPDVYTQFRKAVESEGRVRPVFPTPEKLNPLPPGLEEGPIPIAEDLQQTEPVT DPRSAPPCSGGE

SHALTRLKHFWDTDAVAAYKETRNLIGVDYSTKFSPLAMGSISPRYIYHQIKQYEKERTANQSTYWVIFE  
LLWRDYFRFVGKYGNRIFQVKGLQDKSVPWKEMNLFDAWKEGRTGVPFVDANMRELATTGFMSNRGRQNV  
SFLTKDLGLDWRMGAEWFESELLIDHDVCSNYGNWLYSAGIGNDPRENKRKNMIKQGLDYDSNGDYVRRWVPEL  
QSIRGGDVHTPWALSAAALSHAHVTLGTTYPTPIVMAPEWSRHISKVGATGPSPRGKKGPSHTPKQHRDRGI  
DFYFSRSKNL

>Armadillidium\_nasa\_KAB7496070.1

MTGTSLKGPKHVVHFRKGLRIHDNPSRLRLGLKNSTTFRCIFILDPWFAGSSNVGINRWRFLQSLLEDLDRS  
LRKFNSRLFVIRGQPAKALPDIFREWGNTILTFEEDPEPFGKARDANI IAMAREMGIKVIVRTSHTLYKLDSE  
INPLPFFITLFFLFLISYIKIGVIILIFLFLGFDTDHLHAPVWKGEIEALERLEYHLERKAWVASFGKPKMT  
PQSLYASPTGLSPYLRFGCL SARQFFLKLNDLFQKIKKLPPPLSIHGQLLWREFYYCAATNNPKFDHMEGNPI  
CVQIPWDKNPEALAKWANGQTYGPWIDAIMTQLRQEGWVHNVARHAVACFLTRGDLWVSWEEGMKVFDELLLD  
ADWAVNAGSWMWLSCSSFFQQFFHCYCPVRYGRKADPNGDYIRTYLPILKNFPTKYIHEPWTAPE SIQRAAKC  
IIGKDYMPMPVDHIKQSQHNIERMKQVYQQLTHYRGSINSGSKSGKENNNLLPSSDFEKIHQRRKMKDFKRE  
TNQTVSIHA

>Armadillidium\_nasa\_KAB7504233.1

MKMLSVDLFLGFISVRQISAQRCILEVNRYRQTYPE SVDAYFEECIVRRELADNFCFYQTNYNINGAADWAR  
NTLEIHKKDVRPYLYSKKTLEKAKTHDDLWNSAQIQLIKEGKMHGALRMWAKKILEWTKTPEEALSVAMYLN  
DRYSLDGRDP SGYVGC MISICGIHDQMSWLERDIFGKIRFMNYEGCKRKYNVKTFVARHGGKAYKNTSNSKNH  
FSMTSKKRKGGLGESSKKIKLIDETFVEKLESERNEVARSVTDFSFNKNRVRMLSKQLHIPEKCDGVVYWMSR  
DQRVQGLQEVEDSDQTLNISFHLLLGQAKEVL PKFVKEENMGGVVTDFAPLRLPLQWVKDIENSLPGNVFQGQ  
VDAHNVPWCWVTSSKQEYAAARTIRSKINKNLKEFLT KFPVIAKHPSKVKYKIGNQLTSCLKLDKTVGPVEW  
AKPGSKEGLKMLHEFCIKRLKMFANKRNDPENALSGLSPWIHFGQISAQRCILEVKEYRERFPESVDAYIEE  
CIVRRELADNFCFYQTNYNINGASDWAKNSLEIHKKDVRTYIYNKKTLD EAKTHDDLWNSAQIQLVKEGKMH  
GFLRMWAKKILEWTKTPEEALAI AIYLNDRYNLDGRDPNGYVGC MWSICGIHDQGWAERSIFGKIRYMNYEG  
CKRKFDVKAFVSRYGGKVYTNTSISQKTREVVLSPFKLF

>Armadillidium\_vul\_RXG59456.1

MGGVVTDFSPRLRLPLQWVEDVEKSLPEDVPFGQVDGHNIIPCWVTSTKQEF TARTIRFKINNNLKEFLT KFP  
VIKHPYSTKMKYKNINWESAYQM QMDKT VGPVEWAKPGSKAGLKMLHEFCIKRLKLF AKKNDPENALSGL  
SPWIHFGQISAQRCVLEVNRYRQTYPE SVDAYFEECIVRRELADNFCFYQTNYNINGAAEWARKTLEIHKKD  
VRPYLYSKKTLEKAKTHDDLWNSAQIQLIKEGKMHGALRMWAKKILEWNKSPEEALSVSMYLNDRYSLDGRD  
PSGYVGC MISICGIHDQMSWLERNIFGKIRFMNYEGCKRKYNVKTFVARYGGKAYKYTSN

>Armadillidium\_vul\_RXG60369.1\_cry-2

MTGTSLKGPKHVVHFRKGLRIHDNPSRLRLGLKNSTTFRCIFILDPWFAGSSNVGINRWRFLQSLLEDLDRS  
LRKFNSRLFVIRGQPAKALPDIFREWGNTILTFEEDPEPFGKARDANI IAMAREMGIKVIVRTSHTLYKLDRI  
IEKNGGKPLTYKSFQNILSQIGPPPLDPAITPEEINGGVSP ISEDHDDKYGVPTLEDLGFDTDHLQAPVWK  
GGEIEALERLEHHLERKAWVASFGKPKMTPQSLYASPTGLSPYLRFGCL SARQFFLKLNDLFQKGQTYGPWID  
AIMTQLRQEGWVHNVARHAVALFSYKRRSLGVVFDELLLDADWAVNAGSWMWLSCSSFFQQFFHCYCPVRYGR  
KADPNGDYIRTYLPILKNFPTKYIHEPWTAPE SIQRAAKCIIGKDYMPMPVDHIKQSQHNIERMKQVYQQLTH  
YRGSINSGSKSGKENS NLFPSSDFEKIHQRRKMKDFKRETNQTVSIHA

>Armillaria\_ost\_SJL01787.1\_uncharacte

MQKRVSLSLSTSPPASAKKSRTTGSSSTFKPNKIATQEAAA AVDANPPFPVLLKAVKDGLKDPVKGKSVVYWMR  
MGDLRKCTKVYANMEYEVDEMRRDVKVCSLAKQEGINATFVHDKCIVDPGAIVSAENKPYVVSAYQRRWLVN  
LNDNLPYYLEDCA PPKNSDSIQSSRYSNLFDSSIPTSVEGFELDDPIEKMAFIWPAGEEKALSMLDRFLKT  
KTRSSQMGSTDPLASGEEESKPSSRIVKYDTRRDAADSDTTSRLSPYLSAGVISARTCV RATMELLGVNKVDG  
GKTTGIGRWVQELAWRDFYINLVAFPRVSMGRPWLEKYAAVWVEAHQSSGK GERSKSDSELLQAWKNGMTG  
YPIVDAAMRCIQEMGWLHNRLRMITAMFLTKNLMFDWRVGERYFMENLIDGDLASNNGGWQWCASTGVDPCPY  
FRIFNPYNQSVKADPKGDFIRQFVPELASIKTSEIHNPSAKTARALGYPLPIVDYKETRQALRRFKTPGEM

>Arthrospira\_pla\_WP\_014276518.1\_photolyase

MSDLILFWHRRDLRISDNWGLAAARRVTSQVVGVFCLDPEILSGDDIAPVRVAYMLGCLQCLQEDYQRGGSQ  
LIIQDNPAQGLRKLALVALGAIAVYWNQDVEPLPRQRDRSVEESL TEVGIKVETFWQVLHSPEAIFTGSKEPY  
KVYTPYWRKWIQQPKPEPCQRLKSTGLTEAQEALEAGAIALPTAKDLGFIWSEPFIFILEPGETAASDRLEIF  
CDRAIYEYDEGRNFP AIDGTSVLSPALRFGAIGIRTGLWQKTQEIIALTRSDEARHHIQTWQQLAWREFYQQA  
LYHFALAIAGAFRQPFDRFPWSDNQE HFAQWCQGRGTGYPIVDAAMRQLNQTGWMHNRCRMIVASF LTKDLIIN  
WQWGEKIFYMQTLIDGDLASNNGGWQWSSSGMDPKPLRIFNPASQTQKYDPEAEYIRQWLPELRNLDTAHLVT  
GKISSGDRQACGYPPQPIVDHNRQQKLFKSIYSQLKA

>Artibeus\_jama\_XP\_037016316.1

MGVNAVHFRKGLRLHDN PALKECIQGADTIRCVYILDPWFAGSSNVGINRWRFLQCLLEDLDANLRKLNSRL  
FVIRGQPADVF PRLFKEWNITKLSIEYDSEPF GKERDAAIKKLAMEAGVEVIVRISHTLYDLDKI IELNGGQP  
PLTYKRFQTLISKMEPLEIPVETITSEAI EKCTTPLSDDHDEKYGVPSLEELGFDTDGLPSAVWPGGETEALT  
RLERHLERKAWVANFERPRMNANSLLASPTGLSPYLRFGCLSCRLFYFKLTDLYKKVKKNSSPPLSLYGQLLW

REFFYTAATNNPRFDKMEGNPICVQIPWDKNPEALAKWAEGRGTGFPWIDAIMTQLRQEGWIHHLARHAVACFL  
TRGDLWISWEEGMKVFEELLLDADWSINAGSWMWLSCSSFFQQFFHCYCPVGFGRRTDPNGDIIRRYLPILRG  
FPAKYIYDPWNAPEGIQKVAKCLIGVNYPKPMVNHAEEASRLNIERMKQIYQQLSRYRGLGLLASVPSNPNGNG  
GLMGYSPPENIPGCSSSGRSSMGTGLGSGKRPSQEEDTQGIGPKVQRQSTH

>Artibeus\_jama\_\_XP\_037022087.1

MAATAGTAAAAAPAPASGAGTDGASSVHWFRKGLRLHDNPALLAAVRGARCVRVCYIILDPWFFAASSSVGINRW  
RFLQSLLEDLDTSLRKLNSRLFVVRGQPADVFPRLFKEWGVTRLTTFEYDSEPFGKERDAAIMKMAKEAGVEVV  
TENSHTLYDLDKIIELNGQKPPLTYKRFQAIISRMELPRKPVGSVTSQQMERCPAEIQENHDETYGVPSLEEL  
GFPTEGLGPAVWQGGETEALARLDKHLERKAWVANYERPRMNANSLASPTGLSPYLRFGCLSCRLFYRRLWD  
LYKKVKRNSTPPLSLFGQLLWREFFYTAATNNPRFDRMEGNPICIQIPWDRNPEALAKWAEKGTGFPWIDAIM  
TQLRQEGWIHHLARHAVACFLTRGDLWVSWESGVRVFDELLEDADFSVNAGSWMWLSCSAFFQQFFHCYCPVG  
FGRRTDPNGDIIRRYLPKLGKGFPSRYIYEPWNAPEIQKAAKCIIGVDYPRPIVNHAEYSRLNIERMKQIYQQ  
LSRYRGLCLLASVPSCMEDLSNPVAEPSSTQTGSTSSAGPRPLPSGPASPKRKLEAAEPPGEELSKRARVAE  
LPAPELPSRDV

>Asplenium\_yun\_AGI61039.1\_blue-light

RTTKLCTIVWFRDLRLLEDNPALSVAARAGAVVPVFIWSPEEEGQFHPGRVSRWWLKESLIQLDISLRSLGAF  
LVLRKTHDTLSTLLEIVKTTGATQVVYNHLYDPISLVRDHRVKQGLTENGVQVQSFNGDLLYEPWEVLDDHGK  
PFTFFDSYWTCKLSMPFEPDPSLLPPRRIMALSGSIPSLTPEELGLEDETEKSSNALLARAWAPGWSNADRAL  
EAFLAGPLLEYSRNRHKIDGPTTSLSPHMHFGEVSVRKVYHSVRRLQILWAKDGSKLGEESINIFMRSIGFR  
EYSRYLSFNFPFTHERSLLSNLKSFPWRVDETFKVRWQGRGTGYPLVDAGMRELWATGWLHNVRVRVIVSSFCV  
KFLQLPWRWGMKYFWDTLLEDADLESVDLGWQYISGSLPDGHELDMDNPQIEGYKHDPGEYVRRWLPPELVRL  
PTEWIHHPWDAPPSVLRAAGVELGSNYPRPIVEVMAARERLQQAVSQMWEREALQAAGVGGDGEALDADLQA  
KVVTQPLVSAQLANSVVVGQCDPGSQGVQLPSRSSYRDQMVPSHAKVLEARTDLPREGGLNSEILMSSQQDNL  
PPSTPPPETRNISQSPDSCGKPNVNHDQAAARPACSEPPPPVSDANSTAESSSSPRRPIVEMDKRHDAPTVM  
VPAITHQRPSMDFGCVPYAGDAGQLRKHLLSLQNSRPVNQ

>Asterias\_rub\_XP\_033627319.1\_cry-DASH-1

MSTKLKTIICLLRNDLRYHDNEVLHWAHLNADFVVPYLYCLDPRHYSGTWHYSFPKTGPHRLKFLQLTLHDLKD  
SLKSVGSELVVSERGEPEKVTITNLISQLGKENVKAVALQQEATREETDVERAVEKSCQVPVHKVWGSTLYHKED  
IPFRIPQLPNVFTEFRKRTEQSRVRPTLSMPSRLKPLPTGVDPGCIPTMEEYGMKEPAQDPRTAFPYGGGER  
QALARIQHIFYWDHDIASYKETRNLIGPDYSTKFSSWLALGCLSPRKIYEEIKRYEKERKTNQSTYVWIFEL  
LWRDYFKFVALKFGDRLFYLSGLLGKHREWQENQKLFDAWREGKTVPFVDANMRELATTGFMSNRGRQNVAS  
FLTKDLKLDWRLGAWEFEHLLIDHDVCSNYGNWLYCAGVGTDPRPARKFNVMVKQGLDYDAQGDYIRSWIPELQ  
AIKGGAIHTPWALSSSMLMKCEVTLGHTYPMPPVKAPEWAKHIRTQERGKSGRGPEQRQQTRGVDFYFSSSSQ  
KYKK

>Asterias\_rub\_XP\_033628662.1\_cry-1-like

MNPSVRLSPRKNNERKMGRKRTKGSSRRGVSLVHWFRNKGRLDDNPALKEALVGAKTFRCVYIILDPWFARS  
PNQGVNKRWFLQLCLVDLDSSSLRKLNSRLFLIRGQPSDVFPKLFKEWGVNRLSFEEDPEVFGKQRDAKIKTLA  
ATFQVQVITRLSHTLYDPKEILSVNSNSPPLTYKHFQYILSLDPPFPFEDTITLADIEGVNTAIMSDHDSKY  
GLSSLEELGFDTELDQPPVWIGGETVAKQRLDRHLERKAWVANFERPRMSSASLMTSPTGLGPYLRFGCLSPR  
LFYWRLTLEYCKMKKTTDIPLYLHGQLYWREFFFTLGYNNAKLDQIMIDNPICIPWEENDKKLQQWRNGETG  
FPWIDAIMIQLRQEGWIHPIARHAVACFLTRGDLWISWEEGAKVFEDLLLDADWSVNAGNWIWLSCSSFHQQF  
FHCYKFCPVMFSQQTDPNGDYVRKYIPALKNFSAKYIYNPWTAPLDVQEKAKCVIGKDYPLPMVNHDKVSRI  
SDRMNKILQGVARKPSYDESFTASTLHTKVQNRHRIPNMQKEPPRKLARLTQDHLSTHPNNYMPAQDDLTA  
GTSYMQTQDDLTGNNSYMPTQDELSVGTNSYLQTDDELTAAGNSYMQTQDELTAAGTMSYMPTRDELTAAGNSY  
MATQNEQSAGNNSYMPTQDELTVGTNSYLQSQDDLTAGNSYMSADDELTAAGTNSYLPATYQSSIHPVQDTYS  
IQDAFTMPQDNLLEQDPRQNSPWDDMTRGILHAHVQTTPLGNNWQ

>Asterias\_rub\_XP\_033629349.1\_cry-1-like

MPSKPKSGDLRKTIIAVHWFRHGLRLHDNPSSLDAINLGDELYPIFIFDGEVAGTKVCGFNRRWFLYESLED  
IDRRLKEFGGRLYTFKGDPCITIFSQLEEWGMNLLTFEQDPEPIWQDRDNAVKRLCEERGIKCIERVSHTLWD  
PNEVISRNGGSPVITYAMFQEVVSMIGLPHRANDEPDFRGVKLPICEETFSTYMLPPFEDFGVKMEHVEQERQ  
LWIGGETRALELFEVIRKEAAAFKAGYCLPNQYMPPELLGPPMSLSPYLRFGCLSVRRFYWRIHDTYTELNNV  
ISPTQLTAQLIWREYFYTMSIGNKNFDQMNGNNICLKIDWSEDQEKLQKWTNGQTGYPWIDACMKQLKQEGWI  
HQVARHAVACFLTRGDLWISWEEGLKVFFQYLLDADWSICAGNWMWISSSAFEKVLQCPNCFPCPVRYGRRMDP  
TGEFVRNFLPVLNRNMLPLRYLFEPWKAPLAIQEKSGCIIGKDYPEPIVEHRIAASSNREKMNRTVARLEDKFSY  
CTPSSKTEVLEFSWLPETARGVDKCTADDLCEILGI

>Asterias\_rub\_XP\_033643654.1\_cry-1-like

MAKHQRSLHWFRKGLRLHDNPSSLAAVKGSKFEFRAVFILDPFFVKSSNIGINRWRFLESLRDLDDGLKQLGS  
RLYVLRGQPPSEVFPKLFTQWKVTRLTTFESDTEPYAVKRDDLVTIAEEHGVEIIQKMSHTLYHPQSVIKANGG  
TPPLTYQRLTLVLSKMTLPKQPEPALSKECIGGCALPVGSDHESEFGLPSLEELGLDPSNAGPHLFPGETEG  
LRRMKEQLARQDWCKFEKPKTEPNTLKPSTTVLSPYLKFGCVSARAFYHGVQDVYTRKKTHSKPPVSLHGQL

LWREFYYIAAAGTPNFDKMEGNSVCLQVPWDTNEELLQAWKQGRGTGYPFIDAIMIQLKQEGWIHHLARHAVAC  
FLTRGDLWISWEEGQKVFDKWLDDADWSLNAGNWMWLSASAFFHQYFRVYSPIAFGKKTDKNGDYIRKYLPLV  
KKMPTQYIYEPWIAPRSVQEKAGCLVGTDPYPRPIVVHSDVMKRNMARMKQARATKYGDKSNADTTKEAMTDKK  
KEGSKKRKTKDTKTSTSKSKTLTDFY

>Astyanax\_mexico\_KAG9263125.1

MKHSCIHWFRKGLRLHDNPALKYALHDCKHMYPVFILDWPFKNAQVGINRWRFLIEALKDLDSSLRKLNSRL  
FVIRGVPREVPRLFEWVKVTRLTFEVDSEPYSSQKRDKEVMDLAKQHGVETITKISHTLYNLERVIEENNGKA  
PLTYVRFQTVLNKIGPPKRPVPAPTREDMKGVSTPSSETDKENYGVPTLDELQDSTTLGPVLYPGGEQEALR  
RLDEYMQRTNWVCSFEKPQTSNALKPSTTVLSPYVKFGCLSARTFWWRLAEVYHGKHSAPPVSLHGQLLWR  
EFFYTAAYGIPNFKMEGNTICVQVDWDSNPEHLAAWREARTGFPFIDAIMTQLRQEGWIHHLARHAVACFLT  
RGDLWISWEEGQKVFEELLLDADWALNAGNWQWLSASAFFHQYFRVYSPIAFGKKTDKNGDYIKKYLPIPKKF  
PAQYIYEPWKAOKSIQEQAGCIVGKDYPRPIVDHDTISKKNIQRMKAAYAKRSPDSSDGSERKKGQRKSASIM  
MEMLTKKAKK

>Astyanax\_mexico\_KAG9272970.1

MSVSAMSEVRLKLRDLLLLGLEDAEGFFCLCLSGALGERDTLALFLDLIKPLASGHVQLYSQLSAIHTNYFSRDE  
EEALEVAIALSLHDTNQSRFDQLAERGSSENREPQDPEKLIQKGTCLKHIRPQRDSTDTYTSGPSLVVDDVPLK  
NEDRGHLTKPKKSRRHRKKQOMLKNPSAPRPVLLWLRRDLRMWDNPALIGCLELGAPIIPVFLWNATEEEGSG  
LTKAAGGASKYWMHQALVCLNRSLEERGSHLVTQRAEPSSLTALQALVAETGAGTVVATALYEPWLQERDEAV  
WATLEKQGVKCHYHSYCLRDNPNTVSTRGVGLRGIGSVSHFISCCNQNPGGIGAPLDAPGALPSPSSWPQGC  
PLTQLELALMPVRKDGTVIDWAANIRQAWDFSEEGAQARLETFLKDGVIYRYEKESECRADVNTSCLSPYLHFG  
QLSVRSLLWDARDARCRPQKFQRFKAWRDLAYWQLCLFPDLPWESLRPPYKALPWNDRHLKAWQGRGTGYP  
LVDAAMRQLWLTGWMNNYMRHVAASFLIAYLHIAWQEGYRWFQDTLVDADVAIDAMMWQNGMCGLDHWNFVM  
HPVDAALTCDPNGNYVRQWCPPELKGLPDDFIHKPWCPCGSVLRAGVILGQNYPERVVVELEERRAQSLODVR  
MVRKRFSEYVCQQTGCDDLPLPTKLVEALGSTDDLVRQGGNEFLLPVITRMEFRLEPEDTASHSAVLKGYVS  
RKRDEKIAFLNKCDFTASVMYENAQRRERMEKNHCMLDLQCPPTNRGRGRHRSRPVSGAAQQR

>Astyanax\_mexico\_KAG9273094.1

MVVNTIHWFRKGLRLHDNPSSLDSIAGADSLRCVYILDPWFAPHVSRPGTGHMDLVLMLFLSLSFYRFLQCLE  
DLDASLRKLNSRLFVIRGQPTDVFPRLFKDWKITRLSYEYDSEPFQKERDAAIKKLASEAGVEVTVRISHTLY  
DLDKIIELNGGQSPLTYKRFQALISTMDAVETPAETITAEIMGRCATPISDDHDEKFGVLSLEELGFETEGLS  
SAVWPGGESEALTRLERHLERKAWVANFERPRMNANSLASPTGLSPYLRFGCLSCRHFYFKLTDLYRKVKKN  
SVPPLSLYGKLLWREFFYTAATNNPCFDKMEGNPICVQIPWDRNPEALAKWAEGRGTGFPWIDAIMTQLRQEGW  
IHHLARHAIACFLTRGDLWISWEEGMKVFEELLLDADWSVNAGSWMWLSCSSFFQFFHCYCPVGFGRRTDPN  
GDYIRRYLPILRGFPAKYIYDPWNAPEGVQKLAKCIIGVHYPKPMVNHAEEASRINIERMKQIYQQLTCYRGLG  
LLASVPSNSSGNGDNGGAGSGDSTQEGSAVHLTPANPREDFSAINTSDQQAQQQIGFSGAGRAGSHRQDSKQ  
ARGRGTTMKRHSDEDPASSNGCKIQRQSCN

>Astyanax\_mexico\_KAG9273647.1

MHCFVVAAKRTLNIQTAAKLPRAAGLHALLDGRAASMSAKKAELKRRGGSGQAEGAGGKKQRRSGESAAAAGG  
REDGWLGLEVAELRAKNTGCKFNDKRVRLSEEQKVQKQSCSGVLYWMSRDQVRQDNWALIYAQQQLALAEELPL  
HICFCLVPRYLDAAIRQYAFMIRGLQEVAKCKSLDIQFHFLRGDPEQLLLDFVKSWNIGALVTDNFNPLRLHL  
QWIENVRKGLPSNIPFLQVDAHNVPWCWEASPKLEYGARTIRGKITKQLPDFLTEFPVPDTHPHASKKTAKSV  
NWEEVLDSVEVDRTVGEVEWARPGTSGGMAMLESFIQQRRLRFATERNNNPNSAVSHLSPWLRAGQLSAQRVV  
KEVQRWGNKNAESVASFTEELVVRRELADNFCYINKEYDSIAGAYDWAKTTLKIHKDKRAYLYTQEQLETGK  
THDQLWNAAQRLLLLEGKMHGFMRYWAKKILEWTSPEEALTIALYLNHDHYSLDGCDPNGYVGCMMWSICGIH  
DQGWAERPVGKVRMYNAGCKRKFVSRFERKYAVKTD

>Astyanax\_mexico\_KAG9283299.1

MASPRTVVCLLRNDLRLHDNEVFHWALRNADHIVPLYCFDPRHYLGTQHFNFPPRLRFLDLSVKDLRATLKKT  
GSSLIVRRGKPEEVVNDLIKQLGSVSTVVFHEEVTSEEKQVEKKLKHVCFQNKVKIQTFWGSTLYHRDDLPRR  
HIGGLPDVYTAFRKAVEERSGVRPVLPSADHIRPLPPGLEEGPIPTFEDLEQTEPLEDPRSAFPCRGGESEAL  
TRLQHYFWDTNNAVATYKETRNGLIGVEYSTKFAPWLAVGCISPRYIYEQIKRYEAERTANQSTYWVIFELLWR  
DYFRFVALKYGNRIFHLNGLQDKHVPWKTMDLFLNAWKEGRGTGVPFVDANMRELFLTGFMNSNRGRQNVASFLT  
KDLGLDWRLGAEFWEYLLVDYDVCSNYGNWLYSAGVGNDPRENRKFNMIKQALDYDSNGDYVRQWVPELKGIT  
GGDIHAPWTLSSASLSHSGVELDNTYPTPIIMAPEWSRHINQKPSGAMSSRGKKRGPSTPRQHRDRGIDFYF  
SKSKNL

>Athene\_cuniculata\_XP\_026705138.1

MPSAATGPVVAPAPALCRSVHWFRRGLRLHDNPALQALRDASSLRCIYILDPWFFAASSAVGINRWRFLQSL  
EDLDNSLRKLNSRLFVVRGQPTDVFPRLFKEWGVTRLTFEYDSEPFQKERDAAIVKLAKEAGVEVVIENSHTL  
YDLDRIIELNGHKPPLTYKRFQAIISRMEPLKPKPVSTVISQQMETCKVDIQENHDDVYGVPSLEELGFPTDGL  
APAVWQGGETEALARLDKHLERKAWVANERPRMNANSLASPTGLSPYLRFGCLSCRLFYRLWELYKKVKR  
NSTPPLSLYGQLLWREFFYTAATNNPKFDRMEGNPICQIPWDRNPEALAKWAEGKTGFPWIDAIMTQLRQEG  
WIHHLARHAVACFLTRGDLWISWESGVRVFEELLLDADFVNAGSWMWLSCSAFFQFFHCYCPVGFGRRTDP

SGDYVKRYLPKLGFPSTRYIYEPWNAPE SVQKAACIIGVDY PKPMVNHAETSRLNIERMKQIYQQLSRYRGL  
CLLASVPSCVEDLSGPVTD SASGQGSSTSTAMRLSQADQASPKRKHEGAEELCTEELYKRAKVTGLPAPEIPG  
KSL

>Athene\_cuni\_\_XP\_026710518.1

MRRGQGRKADAPELPRVSQRRKEEEEEEMREARRRAAPSVREFKYNKKRVRLVSQGS DLKDDARCILYWMSRD  
QRVQDNWAFLYAQRLALKQELPLHICFCLVPKFLDATIRHYDFMLRGLQEVAEECSELNIPFHLLLGyakdvl  
PTFVVEHGVGGLVTD FCPLRLPRQWVEDVRERLPDDVPFAQVDAHNIVPCWVASPKQEYSARTIRGKIHAQLP  
EFLTEFPPIRHPYPPSCPAEPIAWEACYSSLQVDRTVKEVEWATPGTATGLSVLQSFIAERLKSFGSHRNDP  
NKAALSNLSPWFHFGQVSTQRAILEVQKHRGKYKESVDAFIEEAVVRRELAENFCYYNENYDSVQGAYDWAQT  
TLKLHAKDKRPFLYKQLQELEQGATHDPLWNAQLQMVREGKMHGFLRMYWAKKILEWTRSPPEALQFAIYLND  
RYELDGRDPNGYVGCLWSICGIHDQGWAERAI FGKIRYMNYAGCKRKF DVGQFERRYAPHTPSQ

>Athene\_cuni\_\_XP\_026720170.1

MPRH TVHLFWKGLWLLDKPTLLAVMESSVIYPVCILDRKFMMSSMMHTGALRWHFLLRSLEVLQKNLWELG SCL  
LVIQGESVPRDHIHKWNIMQVALDAEMEPFCKEMAANVRCLGDELGFVLSLVGHSLCDTKRYVIVLKTSEVS  
PGRFISDLTSIGEKRSLCRRPLFHIRRCRAPDPGLAECYRVPLPVDLKIPPKSLSPWRGDETQGLQRLEEHLT  
DQGWASSTKPRTVLNSLLPNTTGLSPYFSMGCLSVRNFFYRLSNIYAQAKHHS LPPVWLQGQLLWREPCGVA  
SAIPNFTRMVGNPICLQVSWYEDAERLHKQRKTGIPWIDVVMTPLCQEGWIHHLARHTVXFLLRRDLWISWEE  
GMKVFEELLLDADYSISTRNWMMSASAFFHQVXIFCPVHFGKHMDPKGQDLWKYLPILKNFPSKYISEDXTA  
SEEEQKQAVCITGDYFPPLVSHGEXSDHAARLRKRVGAEQRXLVNFD SFLLAVDDTDDPMEMKVKHELCEEN  
ISKGKMARMTEQTEILSGITCWEPKHGPRGKPEAS

>Athene\_cuni\_\_XP\_026721435.1

MEPLEMPVETITPEVMEKCTTPVSDDHDEKYGVPSLEELGFDTDGLPSAVWPGGETEALTRLERHLERKAWVA  
NFERPRMNANSLLASPTGLSPYLRFGCLSCRLFYFKLTDLYKKVKNSSPPLSLYGQLLWREFFFYTAATNNPR  
FDKMEGNPICVQIPWDKNPEALAKWAEGR TGFPWIDAIMTQLRQEGWIHHLARHAVACFLTRGDLWISWEEGM  
KVFEELLLDADWSVNAGSWMWLS CSSFFQQFFHCYCPVGFGRRTDPNGDYIRRYLPVLRGFP AKYIYDPWNAPE  
ESIQKAACIIGVNYPKPMVNHA EASRLNIERMKQIYQQLSRYRGLGLLATVPSNPNGNGGMLMGYSPGESI  
SGCGSTGGAQLGAGDGHTVVQPCALGETHTGASGIQQQGYCQASSILHYAHGDNQQSHLLQAGRTALGTGISA  
GKRPNPEEETQSVSGPKVQRQSTN

>Atractosteus\_spat\_\_MBN3317673.1

MEALS NLSPWLHFGQVSAQRVVLEVRRYGRRW PQSVDVFVEEVVRRELADNFCFYNNKYDRVDGAYEWAQKT  
LREHAKDRRPYLYSRGELEAFRTHDKLWNAAQFQMVSEGKMHGFLRMYWAKKILEWTASPEEALATAIYL NDR  
YELDGRDPNGYVGCMMWSICGIHDQGWKEREIFGKVRYMNYAGCTRKFNVPKFEIKYNPKRCDD EDGNRKRGGD

>Atractosteus\_spat\_\_MBN3318031.1

MMHRSIHWFRKGLRLHDNPALLASLRDCAELWPVFLLD PWF PKNARVSVNRWRFLLRALQDL DGNLRKLGSRL  
FVVRGSPA EVFPRLF EQWKVTRLT FEVDTEPYARQDAQVGKIAEEHGV EVIQKVSHTLYDTERILVENNGKA  
PLTYNRLQALLRTIGAPKRVPVPPPTMEDMKG VCTPCLERHDEEFGVPTLEELGQDPRTAGPELYPGGETEALS  
RLDRHMQRTAWVCGFQKPNTEPNALSPSTTVLSPYLKF GCLSARTFWWR LTDVYRGRKHSEPPVSLHGQLLWR  
EFFYTAGLGIPNFD RMEGNPVCVQIDWDENAEHLAAWREQCQRC SRRAKKVL SLHGQYSRAVGS LWLVTSSAA  
ALFCPTSVRVCVSLRVCVVFEE LLLDADWALNAGNWQWLSASAFFHQYYRVYSPIAFGKKT DKNGDYIRKYLP  
VLKKFPSAYIYEPWKAPRSVQE QAGCIVGKDYPRPIVDHDVVS KKNIQRMKLAYGRR AQLSGEQEGTGKGMKR  
KGQSVADLLTKKQKRDSVEEKRTL SG

>Atractosteus\_spat\_\_MBN3321972.1

MVVNTVHWRKGLRLHDSPALRESLKGASLRVCYIILDPWFAGSSNVGINRWRFL LQCLEDLDASLRKLNSRL  
FVIRGQPADVF PRLFKEWNINRLSFEYDSEPF GKERDAAIKKLASEADVEVIVRSHTLYDLDKI IELNGGQP  
PLTYKRFQTLISRM DPLETPAEPITA EVMGKCTTPVSDDHDEKFGVPSLEELGFDT EGLSSAVWPGGETEALT  
RLERHLERKAWVANFERPRMNANSLLASPTGLSPYLRFGCLSCRLFYFKLTDLYKKVKNSSPPLSLYGQLLW  
REFFFYTAATNNPRFDKMEGNPICVQIPWDKNPEALAKWAEGR TGFPWIDAIMTQLRH EGWIHHLARHAVACFL  
TRGDLWVSWEEGMKVFEELLLDADWSVNAGSWMWLS CSSFFQQFFHCYCPVGFGRRTDPNGDYIRRYLPVLRG  
FPAKYIYDPWNAPE SVQKAACVIGVHYPKPMVHHA EASRLNIERMKQIYQQLSCYRGLGLLASVPSPNPSSG  
VAGMTGFSSGEGMHSSNAAGGVEGQAVTALS YSHGESHRGLQQQGYQMPSGRSSLP SYSSGDSQAGSNLLPQG  
YTRGSTIVHYTQGDSQQVSSVILQQGRGHLPSVLT TVKRPSPEESTQGIVPKVQRQSSN

>Atractosteus\_spat\_\_MBN3324451.1

MTHRTIHLFRKGLRLHDNP TLLGALESSAVLYPVFILDRAFME EAMACGVLRWRFILQSLQDLQRSLAALGSR  
LYVVQGRYDQVLREKVHQWGITQVTFDTEVEPF FTRLD DDIRALGQEMGFSVQSCVAHTLYDVRRIIRANGGE  
APLTYKKFLHVLALLGAPETPARRITREDFRKCRTPT EEEESAKEYRVPSLEDLGIAVESEALWVGGETEGLQR  
LEQHMQNQGWIENFTKPR TIPNSLLPSTTGLSPYFSLGCLSVRMFYHRLSHIYAQSKNHS LPPVSLQGQVLWR  
EFFYTVA AATPNFTRMAGNPICLQIDWYKDQEALDRWKTARTGFPWIDAIMTQLRQEGWIHHLARHAVACFLT  
RGDLWISWEEGMKVFEELLLDADYSVNAGNWMWLSASAFFHQYTRIFCPVRFGRRTDPEGHYLRKYLPVLKNF  
PSQYIYEPWTAPQQVQLEAGCIIGKDYPLPMVNHREVSESNLALMREVRREQE KTAQLTRDTADDPMEVGKKR  
ACQREAE TDRSDAFLEKPERAKRFGHAEGEAKALACNWPSETLRLPALGREVM

>Aureococcus\_ano\_XP\_009033552.1

KLRAWQLGLTGFLVDAAMRQLWVWGWMPNYVRHVVASFLVEHLHLDRHGEAWFHDTLVDADAAINAFMWQN  
GGRSGMDQWNFMHPVHAAKNCDPEGDYVRRWCPELAALPRDHIHQWRAPASL

>Aureococcus\_ano\_XP\_009033826.1\_AURANDRAFT

MAPKTTAVWFRKCLRLHDNAPLVEAAKRGGRLLPIFVLDPHFARPEFVGAPRYRFLLESADLDASLRKRGRSR  
LCVVRGETEATLDGLFAGACDALPGVKVDAILWEEELVEPWGVARVARVAAAARGVAASAVAGGHLLFDPR  
EVLGACGGKAPTTPAMVKAAAALGAVPAPLDPPATLPPPPDGLPDSSVPTLEAMGYEAPPAAAFGVAGGESA  
GLARLEAALARDGGKWARAFEKPKTKSTKFDVDPSTTVLSPYLKFGCVSARLFRARLADVYAGGSHAQPPPTSL  
LGQLYFREMAYANALKHGAAFAASPSPCADIPWDDPATDAAAAARLRAWEAGETGYPFVDAAMRQLRETGWI  
HHLARHAVACFLTRGDLWLPWTEGARVFDRDLLDADWAVNNFNWLGLAGVASWSPPFFRVYSPVFNHKQSSLN  
VDDAAGAYVDRFVPELRKLPKYKYAPWTAPAAVLAAAGVVLGDTYPRPLVDHKVQSKDNIARFKEAQQRNRA  
NKPKPPPKGAPKTKKQKV

>Aureococcus\_ano\_XP\_009034388.1

MSALAATAKPTTIVWLRLDELRVHDNALLAEAAARGGPVLPVYVLDDRVFDAAATSESGGSRKCGAKRARFTLE  
ALDDLRLATLGARGSGLVVERGRPADVLAGLCAAVGGDATVLCSDAACSEERKDEAAVAKVAPLAKVWEGTLYH  
PEDLRGVAFHDLFTAWRTKVEKAGTRVRGDFVFPKAATLPAPPAGVDAKLAAPLPTLDALGYDAADAACDGRGD  
FFAPAGGETAALARLRKYVFEEEDRLKDYFNTRDGMIGQGYSTKLAPWLSRGCVSRAVARACADYERTRGIKN  
KSTYWVVFELTWRDYFVFYAQKYGSKLFRPYGVKDIRERTWRADPEALRRWKAGETGAPLVDANMRELAATGF  
MSNRGRQNVASYLVLDLGLDWRLGAEHFEEHLVDYTPCANWGNWHAAGLSGGRVNRFNILKQSKDYDPKGDY  
VKLWIPELAKVPAPQCFTPSSLSKADREAAGAGDYPAPLPTQGFKFPD GARPGKKSHQQDRKGKGGERAQIQR  
KRKQKSRVQASAWAE

>Auxenochlorella\_pyr\_BAE48230.1\_CPD\_photol

WMSRDQVRDNWALIYAAQAAAARGVPVAVAFSLVTEFLGAGARQFGFMVRGLQLIQPKLEALNIPFFLLKGD  
PSETIPKLVDGTGASLLVTDYAPLRLGRQWRQAVAEQLEVPFHEVDAHNVPVWVASDKREYAARTIRPKIHS  
KLPEFLKEYPELPQQATWAHEVKPEAVDWEALIAEVLERGVKAVPEVDWCKPGEDAAMEALAGGKGFSLKARLS  
KYDAQRNDPTVADALSNSPYLHFGHLAPQRAAIEAAKHKSTHKASVEGFLEELVVRRELSNCHYVENYDS  
LDAAWDWARQTLNDRNDKREHVYTKQFEKGATHDKLWNAAQLEMVHCGKMHGFMRMWAKKILEWTASPEE  
ALEIAIYLNDRKYELDGRDPNGYVGCMWSIAGIHDQGWAERAVFGKIRYMNYAGCKRKFDVDKYVARINAMVSS  
IKAKAKAAKA

>Balaeniceps\_rex\_NXS41518.1

KVDYDVC SNYGNWLYSAGIGNDPRDNRKFNMIKQGLDYDGNNGDYVRLWVPELQGIKGADIHTPWALNSAALSQ  
AGVTLGETYPPQVVIAPWESRHINQSPQGRSPHPRGRGPARTPVQHKDRGIDFYFSRKKDV

>Balaeniceps\_rex\_NXS42748.1

CIYILDPWFAASSAVGINRWRFLQSLLEDLNSLRKLNSRLFVVRGQPTDVFPRLFKEWGVTRLTFFEYDSEPF  
GKERDAAIVKLAKAEAGVEVVIENSHTLYDLDRILNGLHKPPLTYKRFQAIISRMELPKKPVSTVTSQQMETC  
KVDIQENHDDVYGVPSLEELGFPTDGLAPAVWQGGETEALARLDKHLERKAWVANYERPRMNANSLLASPTGL  
SPYLRFGCLSCRLFYRLWELYYKKVRNSTPPLSLYGLLWREFFYTAATNNPKFDRMEGNPICIQIPWDRNP  
EALAKWAEKGTGFPWIDAIMTQLRQEGWIHHLARHAVACFLTRGDLWISWESGVRVFDLLELDDADFSVNAGSW  
MWLSCSAFFQQFFHCYCPVGFGRRTDPSGDYVKRYLPKLKGFPSRYIYEPWNAPEVSQKAAKCIIGVDYPKPM  
VNHAETSRLNIERMKQIYQQLSRYRGLCLLASVPSCAEDLSGPVADSVSGQGCSTSTAMRLSQADQASPKRKH  
EGAEELCTEELYKRAKVTCLPAPEIPGKSL

>Balaeniceps\_rex\_NXS44423.1

MPHRTIHLFRKGLRLHDNPTLLAALESSELVYPVYILDRKFMTSVMHIGALRWHFLLQSLLEDLQKNLRQLGSC  
LLVIQGEYESVLRDHIQKWNITQVTLDAMEPFYKEMEANIRRLGEELGFEVLSLVGHSLYDTRKILDLNGGT  
PPLTYKRFLHILSLLDGPEVPVRNLTAEDFQRCRPPDPGLAECYRVPLPVDLKIIPESLSPWRGGETEGLQRL  
EQHLTDQGWVASFTKPRITPNSLLPSTTGLSPYFSMGCLSVRTFFHRLSNIIYAQAKHSLPPVSLQGQLLWRE  
FFYTVASATPNFTKMAGNPICLQISWYEDAERLHKWKTAQTGF PWIDAIMTQLRQEGWIHHLARHAVACFLTR  
GDLWISWEEGMKVFEELLLDADYSINAGNMMWLSASAFFHQYTRIFCPVLF GKRTDPEGQYVRKYLPVLKNFP  
SKYIYEPWTASEEEQKQAGCIIIGQDYPPFMVNHKEASDHNQLMKRVREEQYRTAQLTRDDTDDPMEMKVKHD  
HSEENISKGVARMTE

>Balaeniceps\_rex\_NXS47370.1

DNWAFLYAQRALAKQELPLHVCFLVPKFLDATIRHYGFMLSGLQEVAKECAELNIPFHLLLGAKDVLPAFV  
VEHGVGGLVTDFCPLRLPQQWVQDVRERLPEDVPFAQVDAHNIVPCWVASPKQEYSARTIRGKIHAQLPEFLT  
EFPPVIHHPYPPSCPAEPIAWACYSSLQVDRVTKEVEWATPGTSAGLAVLQSFIAERLKSFSHRNDPNKAA  
LSNLSFWFHFGQVSTQRAILEVQKQRGKYKESVDAFVEEAVVRRELAENFCYNNENYDSVQGAYDWAQTTLKL  
HAKDKRPFLYELQELEQGTTHDPLWNAQLQMVREGKMHGFLRMWAKKILEWTRSPPEALQFAIYLNDRYEL  
DGRDPNGYLTLCCLWSICGIHDQGWAERAIIFGKIRYMNYAGCKRKFDVGQFERRYAPRT

>Balaeniceps\_rex\_NXS50437.1

MQHSSIHWRKGLRLHDNPALLAAAANCCRLHPLFI FIDPSRDRAGANARRFLLDALRDLDRSLREMGSRFLVV  
RGCPEEVFPRLFHAWGTTRLTTFEVDTEPPARRRDAAVAELAARHGVEVIQEVSHSTLYDTERVLALNDGKAPLT

YKRLQSQLLASLGPPEKVPVPALTEEHLQGEHGVDLGRARARSWVSVSLTVDPGAERWPSHPHCPRHPRLPHPAW  
VCGFKKPETEPTSLSPSTTVLSPYLKFGCLSVRTFWWRLDEVYQGREHSRPPVSLHGQLLWREFFYTAGASIP  
NFD RMVGNPVCLQVDWDDNPQH LRAWREGQTGYPFIDAIMTQLRTKGWIHHLARHAVACFLTRGDLWVSWEEG  
LKVFEELLLDADWSLNAGNWLWLSGSAFFHRYFRVYSPIAFGKKTDRDGAYIRKYL PVLKDFPTEYIYEPWKA  
PRAVQE QVGCLVGTHTYPQPIVEHRAASERNLGRMKAAR

>Baryphthengus\_mart\_\_NXG68295.1

MPHRTVHLFRKGLRLHDNPTLLAALESSEVLYPVYILDRRFMTSAMRVGALRWRFLQLSLEDLRKNLGLQLGSS  
LLVLQGEHEAVLREL VQEWNITQVTLD AEVEPFYKEMEANIRRLGEELGFVLSMVGHSLYDTNRILDLNGGT  
PPLTYKRFLHVL SLLGDPELPVRDLTAGDFQRCGAPEPGLAERYKVPLPVDLEVPPESLSPWRGGETEGLRRL  
EQHLTDQGWVTSFTKPR TIPSLLPSTTGLSPYFSVGCLSVRTFFYRLSNIYAQAKHSLPPVSLQGGQLLWRE  
FFYT VASATPNFTQMAGNPICLQIRWYEDEEMLHKWKT AQTGFPWIDAIMTQLRQEGWIHHLARHAVACFLTR  
GDLWISWEEGMKVFEELLLDADYSVNAGNMMWLSASAFFHQYRRIFCPVRFGKRTDPEGQYIRKYL PVLKNFA  
SKYIYEPWTASEEEQKQAGCII GQDYPFPMVNHKEASDHNLQLMQQVREEQSRTAQLTRDESDDPMEMKTKRD  
RAEENLSKGKVAKTTE

>Baryphthengus\_mart\_\_NXG70584.1

KVDYDVCSNYGNWLYSAGIGNDPRDNRRFNVIKQGLDYG DG GDYVRLWIPELGGIEGADIHAPWALSSTALSQ  
AGVTLGDTYPQPVVTAPEWGRHISQRPQGRSPHPKGRRGP THPPKQHKDRGIDFYFSRKDA

>Baryphthengus\_mart\_\_NXG76848.1

DNWAFLYAQRLALKQELPLHVCFLVPKFLDATIRHYGFILRGLQEVAKECAELNIPFHLLLGCAKDVLPTFV  
VERGVGGLVTD FCPHLPRQWVEDVKEQLPEDVPFVQVDAHNIVPCWVTS PKQEYSARTIRGKIHAQLPEFLT  
EFPPVIRHPYSSSCP AETITWEACYSSLQVDRTVKEVAWATPGTAAGLAVLRSFIAERLKSFGSHRNDPNKAA  
LSNLSPWFHFGQLSTQRAILEVQKHRGKYKESVDAFVEEA VVRRELAENFCYYNENYDSVQ GAYDWAQTTLKL  
HTKDKRPFLYELQELEQGTTHDPLWNAQLQMVREGKMHGFLRMYWAKKILEWTRSPEEALRF AIYLNDRYEL  
DGTDPNGYLM LCPHPTGCLWSICGIHDQGWAERAIFGKIRYMN YAGCKRKFDVQGQFERRYAPRT

>Baryphthengus\_mart\_\_NXG77614.1

SLEDLDNSLRKLSRLFVVVRGQPTDVFPRLFKEWGVTRLTFEYDSEPF GKERDAAIVKLAKEAGVEVVIENSH  
TLYDLDRI IELNGHKPPLTYKRFQAIISRMELPKKPVSTVIRQQMETCKVDIQENHDDVYG VPSLEELGFPTD  
GLAPAVWQGGETEALARLDKHLERKAWVAN YERPRMNANSLLASPTGLSPYLRFGCLSCRLFYRLWELYKKV  
KRNSTPPLSLY GQLLWREFFYTAATNNPKFDRMEGNPICIQIPWDRNPEALAKWAEKGTGFPWIDAIMTQLRQ  
EGWIHHLARHAVACFLTRGDLWISWESGVRVFEDELLDADFSVNAGSMMWLSCSAFFQQFFHCYCPVGFGRRRT  
DPSGDYVKRYLPKLKGFP SRYIYEPWNAPE SVQKAAKCIIGVDY PKPMVNHAETSRLNIERMKQIYQQLSRYR  
GLCLLASVPSCVEDLSGPVTDSSSGQGCSTSAAMRLSQADQASPKRKHEGAEEELCAEELYKRAKVTGLPAAEI  
PGKNL

>Baryphthengus\_mart\_\_NXG79270.1

FLLQCLEDLDANLRKLSRLFVIRGQPADVFPRLFKEWNI AKLSIEYDSEPF GKERDAAIKKLASEAGVEVIV  
RISHTLYDLDKII IELNGGQPPLTYKRFQTLISRMEPLEMPVETITPEVMEKCTTPVSDDHDEKYG VPSLEELG  
FDTDGLPSAVWPGGETEALTRLERHLERKAWVANFERPRMNANSLLASPTGLSPYLRFGCLSCRLFYFKLTDL  
YKKVKKNSSPPLSLY GQLLWREFFYTAATNNPRFDKMEGNPICVQIPWDKNPEALAKWAEGR TGFPWIDAIMT  
QLRQEGWIHHLARHAVACFLTRGDLWISWEEGMKVFEELLLDADWSVNAGSMMWLSCSSFFQQFFHCYCPVGFG  
GRRTDPNGDYIRRYLPVLRGFP AKYIYDPWNAPESTQKAAKCIIGVNYPKPMVNHA EASRLNIERMKQIYQQ  
SRYRGLGLLATVPSNPNNGNGGMLMGYSPGESISGCGSTGGAQLGTGDGHTVVQSCALGDSHTGSSGIQQQGY  
CQASSILHYAHGDNQQSHLLQAGRTTLGTGISTGKRPNPEEETQSVGPKVQRQSTN

>Basidiobolus\_mer\_ORX77140.1\_cry

MVNSIMLHSTPTRRSV IICLFRHDLRIRDNPILHYANSHPTATHMLPVYCFDPRQVNLTRARGKDYAEPKSRL  
FNLPRSSKLRTFLVESVLNLKTNLKKLGSELLIALEPPEEF LPRVADELLPEYDVEAVYLQEEVTDEEIRVQ  
QKLIHRMNAPVESF HGATLVHPEDLPFPMEDLPDVYTKFRKAVESMDTPFRPVLPTPKKLKPLPGNDLLDQML  
TVDADHLLPSMGVVD TAPDLRTVFPFGGGEDQAIERLTDWVWNTKSI STYKETRNGLLGTDYSSKLS PWLALG  
CLSPREILKQVEAYEDSNEANISTY WIRFELLWRDYFWFVGKYGNGIFHRDGVLANRSDDQPSWKVDPNLMK  
AWIHGETGIPWVDANMREL RNTGYMSNRGRQNVASF LAKDLRVDWRFGGEWFETHLLDYDPCS NYGNWQYGW  
F SVAGVGNDPRENRHFNMIKQAKDYDPEGKYVAMWCPEL RDPVKHIHTPWKMPHDVQQKANC VIGRDYPEPIV  
LQEVWEKHVARPPKDTKKSSGNPNERVSKKDSRRRQRRKAKASKPHSHR

>Basidiobolus\_mer\_ORX97314.1\_DNA\_photol

MNTFIWFRTDLRTADNTALHAAAE CARQGAGALLGVFVISPEEWKAHDLSPFKVDFM LRLNTQLRKKLKE LNV  
PLVIEHAENQSDVPQIVLSCCQKYNVDKVFCNQEYEVDEEKRAKTEALLQHNI EFYRRHDQCIVEPGVVVT  
QAEKPYTVFTPFKKNL RKVGSDDKKYHNPLPAPSPFPEQNLSRCRTSAQTDPPGELPEFPLSP EMKKVASSMY  
PEGEEKAIERLDRFVQKKISNYDTGRDFPIDDGTSVLSPYLALGVISPRQCLAKALGANENRIASGNEGVTW  
ISELAWRDFYRNVLVSFPRVCKNRAFKPETEDIEWNDNPKHFTAWCEGRTGYPIVDAGMRQLNSIGWMHNR LR  
MVVAMFLTKDLLINWQKGERYFMNHLVDGDFASNNGGWQWAASTGTDSQPYFRI FNPALQSERFDKNGDFIRK  
WVPELKPVKGKAIHEPYKHLSPSEFKKLGYPKPIIDH SKARQTTLAAFKAI AKK

>Bathycoccus\_pra\_XP\_007509298.1\_predicted\_

MSPALSNVDDGKTKKKKRVILWHRNDLRVHDNLTKEALTFCSESELCELVPTYIFDPRWFLSDDAFDRSDQ  
KRREKSLTNAPKCSQRRAEFLLESVLDLKERYKRLGSDLLIKIGKSENVLDALDADVVCSEVCEDEALER  
KVVRKAKGELKLVDNTLYHYEDVFESGNCYQNGLNDLPTQFTQFKNKVESKVSVRKPIINDAELSDGLKKFS  
SPSNVSEEMQFVPTIEDIPLSDDARQMHAAIPKDNSITPVYSFKGGESEALKRVQRYLYETDAVATYFDTRN  
GMLEDLESTKLAPYLALGCISPRFIENEIRKYEKERVENKSTYWVIFELTWRDFYRFFALRHGAKIFKLDGIG  
SNGKMPWPWTAEHEGRDEIFEKWISGTTGYPLIDANMRELKLTGWMSNRGRQNVASWLALDARIDWRMGAEWFE  
FLLLDYDPASNWGNWVAAAGLTRGRVNKFNIPKQTKDYDPQMKYCRKFIPELDSKDYPRPVQLKKFAFEES  
SRNNGGRNGPGRGTTNGRGGRGKQNRQPRNNAFYDDDRQNGGGGS

>Bathycoccus\_pra\_XP\_007511873.1\_CPD\_photol

MLLRTATRCCSPLLNNRFALFKSSKRTPARRSATTCAFFPSSSLFTNLTTTTTTASATARGFQDHFARRSNR  
ASSNRTLTLTLLQSPNGGRFTTRKKHTAAISSTFVVYAGTTNTTIDINENNNNNKNEDKNMIVHPDRVMLIND  
QPILREGNGPIVYWMSSRDQVRVNDNWAMLYAIELANKEKKPLVVVFNVTFLGAGARQFGFMLRGLREVESAL  
EERDIPFKLLHGGDEPNAEIEKFCNEVNASAVVTDFSPLRLGLKWRDDFAKETKRSVRVDAHNIVPCWVASP  
KLEVGARTLRGKLAKLYGDFMVPFPDNFPNVENKDAALHAKIKSVKTDWDDVLGQALERGKDVPEVTWAVPGE  
KAAMAVLDNFLTTRMSLYGLRNDPAKPQALSGLSPYLHFGQISGQRCAMKALEAKKGSNGKAVDVFFEEELVVR  
RELADNFCYSPQYDTIEGQKYDWAKDTLRMHAGDKREYTYTYEEFEQAKTHDNLWNAAQRELVYGGKMHGFM  
RMYWAKKILEWSDTPENALKYAIALNDRWSLDGRDPSGYVGCWMSIVGVHDQGWKEREIFGKIRYMAYS  
GCEK KFKIPEYIKRVDALVEAVQKCEVSYKSNPGAWEIGRDDVLPKVAKSDNDDDDERKSKKQKK

>Bathycoccus\_pra\_XP\_007514096.1\_protein

MGNEATTSIVWFRKGLRIHDNPALSEALIDAKNFGGGDESKKVLPLFILDPWFCNEKSVGANRMNLLQSLTN  
LNENLGSLLSIENVNDANNCLTVVQGPKDVLPNVIKKFNVSSVYFEKEQVEPFQKQRDEEIIEMCKKLNV  
NTYASHTLYDQEFLLSKASAKGIPPSTMGAFQKVLANVGEPPSPVPEPPKNSLRVIPNAGDALSKEFKYANGI  
PTLEDLGYKAKSLSFKGGKGGTEGLRRMRGALCRGGDYKYVQEFQSSPCQLFAKEKSGSKALNPFEMA  
KKASSSSSPKEESLLWPSTTALSPLHKFGTVSVRQFYFELQDILKNELKGKHTNPPTSMLGQILWREFYVNA  
CGTPNYDKMVGNRICKQIKWKHDPENLAKWENAQTGFPIWDAAMTQLKEEGWMHHLARHAVACFLTRGDLFIS  
WEEGARVFDRLVDADWALNNGNWMWLSASSFFYQYFRVYGPHSFAKKYDKEGAYVKHFLPVLKDMPSKYVYE  
PWTAPLEVQKAGCIVGVDPKPMVDHAIASKQCMAMWNEAYAAGKEKKSGGEEKSNKKAKTK

>Batillaria\_attr\_KAG5688704.1

MPGDSNQKKEDNWALLYAQRLALKLELPLYVVFCLVPKFLDATIRQFGFMLKGLAEVEKECRELGISFHLLMG  
EARTVLPNFVKNNIGGVVTDFSPLRPTKWKVQDMAKELPQEIIPFCQVDAHNIVPCWEASPKLEYSARTIRTK  
IHNVLSEYLTEFPVVKHPHKVKAMPEPVDWDAHKFLEVDRSVGEVEWATAGTAAAYSTLESFCTQRLKYFS  
SERNDPNKPALSNLSPWIHFQGISVQRCILMVKMFKSREKDGADAFIEEAVVRRELADNFCFYNEHYDSIKGA  
YKWAQDSLDAHRGDKRPYIYTRQQLDAKTHDDLWNAAQVQMVREGKMHGFLRMYWAKKILEWTESPEQALAE  
AIYLNDRKYNLDGRDPNGYVGCWMSICGIHDQGWAERAVFGKIRYMNYNGCKRKFDPVPGFVRKYRKK

>Batillaria\_attr\_KAG5693470.1

MLLSVLWQLNPGILEANNNPPLTYRRFQSILSGLPPPPLPLDPITTSVQHTQTPISDDHDEKYGVPTLEEL  
GFETDSLGPARGFQGESEALARTYRHLERKAWVASFERPKMSPQSLFPSQTGLSPYLRFGCLSPRLFYWKLTE  
LYKKVKKGQDPPLALHGQLLWREFFYSAATNNPNFDMVGNSVCVQIPWDHNPEALAKWAEGHTGFPWIDAIM  
VQLKKEGWIIHHLARHAVACFLTRGDLWISWEEGMKQFFHCYCPVNFGRADPTGDFVRHYLPVLKWFPTQYIY  
EPWTAPEAVQKAACKIIGKDYPLPMVDHSHVSRINMERMRQVYKHLVLCSTVSGYRRKLDLPKIPKMDMFCLK  
ANMFSSTSSDDDEQTSVIRRENKI

>Batillaria\_attr\_KAG5702948.1

MNACRKKPAAPLHPIPVPPKKWSLVGMDIIGPLQVTDGRNQYIVALTDHFTKFPVAKAIPCKSSEEVARFMYE  
TICIFGAFDSLITDQGREFINFALDILTRFNINHRISAYHPETNGQREDRNRTLKDTLVKITDNDWDDELL  
PAALFAYRTSVHKSTQFSPLALYGEQAKLPFDVTGDANEQDLNEEIMDTMKGIIHEEVKNKIGENISRAQKKQ  
KEYYDSRRAYDHGFRIGDKVLIINAAVRHRMGGKMAPRFVGPYELFKLLDSNWLCKFEKPQTEPNSLQPSTTV  
LSPYLKFGCLSARTFYRLLLEVYRLNKFHSQPPVSLHGQLLWREMFYTVGAGTPNFDRMEGNPVCQRQIPWDTN  
PEYLAAWKEGRTGYPFIDAIMTQLRQEGWIHHLARHAVACFLTRGDLWISWEEGQKVFEELLLDADWSLNAGN  
WMWLSASAFFHQYFRVYSPIAFGKKTDKNGDIYKKYLPILRKFPAYQYIYEPWKAAPRSVQEAAGCVIGRDYPKP  
IVDHDITISKKNIKRMAEAYASHKEGKDSSEMDEEKYQ

>Batillaria\_attr\_KAG5704110.1

TNGAGYPRMRFLLECLDDLDKTLRQKGGRLFVLHGQPEDVFPKLFQEWGVTRLTFEQDPEPVWQDRDNKVKAL  
CKELEVEECIEKVSHTLWDPLNIIQANGSPPLTYAMFCQVTEIVGLPPRACPDPDFTGKVLPSVHGDVAKFHV  
PTCEELGVYPESDRQSHPLSGYSGGECRALELLELRIEKERQAFERGQCLPNQINPDLTGLPMSLSPHLRFGS  
LSVRHFYWLIHRTFMEVTQSETVPTSITGQLIWREYFYCMSVNNPKYNCMEGNPICLDIDWYRNMEQFEKWSK  
GQTGYPWIDACMRQLREEGWIIHVCQSVACFLTRGDLWIDWQMGLEVFDRLVDADWSVCAGNWMWVSSSAF  
EKVLQCPRCVCPVRYGRRMDPKGDYVRRYVPELQNMPLLYLFEPWKAPAAVQETAGCVVGRDYPMPMVDHKQA  
SKMCMAMEKIKGKCRDVPPIAPSNEAEVISFIWIGNKSEDDKNIRCDQHDMRLRDKVR

>Batillaria\_attr\_KAG5707978.1

MNNLYEPCLKARDDKICKQLESQGVFVKRFHSYLLHEPGSVNTESMGMRGIGSVTHFMECCRQSSTQSISGLPA  
DKPPCLPASGSMPPQSQALDELGLSRLPRRRDGTVIDWAKGIRESWDFSEDGAWNALELFVDEGIRHYEKESGR  
ADMLNTRSPPYLHFGQVSPRAVLRHAQGMRSKPKFLRKLAWRDLSYWLLTLFPMPSPKPMRPHYQAQRWSQDK  
SHLRAWQKGKGTGYPLVDAAMRQLWLTGWMNNYTRHVVASFLISYHLHWEHGYAWFQDTLLDADVAINAMMWQ  
NGGMSGLDQWNFMHPVDAAMTCDPNGQYVRQWCPELAALPDDFIHKPWKCPPSVLRRAGVELGKTYPHRIIT  
DLEEAREQSLRDVVTLRLANHQYVDPYTGNDLVPLPSGLLLPVITRKEFKYKTANPHAKDNPHATAVLRGYRSR  
KRDEAIAFANQVDFTASTMNECALRQKRYEQANRFVQF

>Batillaria\_attr\_\_KAG5712394.1

ALQWAHRNSDHILPLYCFDPRHFKGTYHFGFPKTGPHRLKFLLESIEDLRQNLQKHGSNLIVRQGKPEAVVPE  
LVKQLGTENVEALVFQKEVTQEEDVDEKKEKCGVKVHTVWGHITLNVDDLPFKPHNLPDVTQFRKRVESQ  
DRVQRQEIAMPETLRPLPPDVLGNVPSFDDFGMPKPQAASSSVFPFPGGETTALCRLESYLWKTNDVATYKET  
RNGMIGSEYSTKFSPLAHGCI SPRKIYWEIKKYERERTANQSTYWVIFELLWRDYFRFVALKYGNRIFFLEG  
IQGKNIPWKKDMKQFEAWKEGRTGVPYVDANMRELMATGFMSNRGRQNVASFLT KDHLHDWRLGAEFESALI  
DHDVCSNYGNWLYSAGLGNDPREDRKFN VVKQGLDYDSNGDYVRLWVPELSKVQGGSVHFVWTLNSAVLSHSD  
VSLGETYPTPLVVAPEWSRHFGRP

>Bemisia\_tab\_XP\_018904762.1\_cry-2

MAARGTAIHWIRKGMRLHDNPALIAAIESQKNVGEICILRPVYILD PYFRKYM RVSPNRWRFLQQALEDLDKS  
FRAIGTRLYVLHGKPEEIFFPELLKEWNVKLLTFESDIEPYACKRDSSVMSIAKKFGVKVLQSVSHTLYNPEII  
IKKNLGKAPLTYQKFTTVVDSIGLPPKVPDAPNALPKEAQPEDLAAAKYNVPTLAEFGLDVKS LHPTKFPGGE  
TEGLARLAEKLSDKAWCKFEKPNTSPNSLEPSTTVLSPYLKFGCVSARLFYKVKDVISKAPHSKPPTSLIG  
QLFWREFYYTVASVTPNFHKMEGNPVCCQVPWDSNSEHLDAWAFGRGTGYPFIDAIMRQLRQEGWIHHLARHAV  
ACFLTRGDLWISWEEGQGVFEELLLDADWALNAGNWMWLSASAFFHQFFRVYSPVAFGKKTDFKGDYIKKYVP  
ELGKYPSEYIYEPWNAPKSLQERAGCVIGVDYPKRIVIHENVYKNNIQRM SLAYKNNKQNTETTNSNPAGSSK  
SKTGKGGSTKRKPEAEVAASGIKKFLKKN

>Bemisia\_tab\_XP\_018905816.1\_photolyase

MSSAPPAKKAKAETSESSNGSSSSEGGFEEFLKQIEEDRKKAASVLEFKFNKKRVRILSKSKEVPEWGKGV  
YWTFRDQRIHDNWAFLFAQKLALKNDVPLHFAFCRLPKFLD ATLRHF KFI FEGLKETEKECKKLN IQFHFLIG  
CGKDVLPDFVKKHKLGA VVIDFMPLRGPMWADEL SKSLPDGVPLVQVDAHNIVPVWETSEKLEYAARTIRNK  
VNGKLP EFLTQYPPVIKHPHSGDLKASPIDWEEAEKTLEVDKSVGPVKWAKPGYRGGMQQLYTFVTKRIKNYG  
TARNDPKNALSM LSPWFHFGHISVQRAILEVKKVKGYSESVAAFCEEAI VRRELSDNFCFYNNKYDSIKGAY  
DWAKKTLKDHSGDKRPYLYTKAELEQGHTHDDLWNAAQNTLINDGKIHGFM RMYWAKKILEWTESPEQALQYA  
IYLNDKYS LDGRDPNGFVGCMWSICGIHDQGW SERAVFGKIRYMN YEGCKRKFDINGYIIKHGGKVYTKGKEN  
TMDKFVKKKK

>Bemisia\_tab\_XP\_018906320.1\_putative\_c

MASPKILIYLLRRDLRVHDNPIFHKLTSMSSQANAPFTHLLPLYVFP AHQIEVSGFLSSSDEKSPYPEARSKV  
GKFWRGQLRAKFLAESVWDLKQNL ETIGSGLEIRVGM LHDVVKQLVEGFKSKGVQVKGLWMTSEEGYEEKAE  
ERQVRKII VNAGGDFQLWKDEKYFIDDDIPFDDPQKYPDVFTKYRNTVEPLREAPRKVLPTPKKLPLPQNI  
PPQAHPFKIPGNLKD LIAALQKPLDAGLG LKNPPQMPSAGASSAVPFAGGATSGQKRLKHLIESGAMTRYKDT  
RNGMVGTDYSSKLSLWLALGSLTAREVHSALIDFEEGKT DVGKGAEGYGKGENKGTTHMRFELLWRDYMRLCT  
RKYGSRLFLVGGFRNARNIQWKHDNSIMQRWLEGGTIGIGLVDA AQRELFTGTFTSNRARQNVASFLT KHLEQD  
WRLGAEWYECNLVDYDVSSNWGNWQYTAGVGNDPREDRKFN PVKQASDYDPKAEFVKAWIPEVRELQPEEAWQ  
CWKASYAAKQKPGLRGNIMAERPLAKISFTPRSGGNDGHRGGGRSRGRAQWF

>Bemisia\_tab\_XP\_018915448.1\_cry-1

MSEDRSRVSVLWFRHGLRIHDNPALLRALEDTDIFYPIFIFDGESAGTKLISYRMKFLLESLEDLDNQFRA  
KGGKLYVFFGSPIEIFAKFKAHLNFYKLTFEQDCEPIWQARDNSVKKLCDDLDI IWDESISHTLWDPREIIDT  
NGGSPPLTYSMFLHTVSVIGPPRPVEDPCWDGIKFGVLPDSL KRELDVRDKIPVPADFN LKPELKQSEY TIE  
WFGGENQALS NLRKRIAVEEKA FRQGFCQPNQTQPDLLGPPTSQSAALRYGCLSVRKFFWALHDTFSDVHNMP  
SNSNITSQLIWREYFYTMSVDNKYYAEMARNPVCLNIPWSSVKDETAKANL KAWEDGKTGYPFIDALMRQLKQ  
EGWIIHIGRNAVSSFLTRGDLWISWEEGLRHFLRYLLDADWSVCAGNMMWVSSSAFEKL LDCNFCICPVNYGR  
RLDPYGEFVKRYVPELQKMPVEYVYEPWRAPLEVQEHANCVIGRDYPKRIVDHN VVSHENKEKMKEICKSLKV  
RTPHCAPSDELEIRQYMWLPDSCTSHLSTLK

>Bemisia\_tab\_XP\_018916708.1\_cry-1-like

MLDDNMGT SKHTMHWFRKGLRLHDNP SLMEGLIGASTFRFCVFIIDPWFASTSNVGINKWRFL LQCLEDLDCS  
LRKLN SRLFVIRGQPADALPKLFKEWNITCLSFEEDPEPFGKVRDQ NIMALCKELSIEVISRVSH TLYKLDKI  
IEKNGGRAPLTYHQFQT VIAQLDPPQQAESPVSRLIANAF TPISEDHDETYGVPTLEELGFSTEGLLPPVWL  
GGEAEAMTRLKRHLERKAWVASFDRPKMTPE SLQASQTGLSPYLRFGCLSTRLFYYQLNDLYKKVIDIKKAVP  
PLSLHGQLLWREFFYCAATNNPNFDMVGNPICVQIPWDKNAEALAKWANAQTGF PWIDAIMTQLREEGWIIH  
LARHAVACFLTRGDLWMSWEEGMKVFEELLLDADWSV NAGMWMWLS CSSFFQQFFHCYDPVRFRGRKADPNGDY  
IRKYL PVLKNMPTKYIHEPWIAPGPVQKAAKCLIGEDYPLPMVNHAVASRINI ERMKQVYLQLSKYKNLGQHC  
MPISTKESTKSIMNSNIPIPLMDYS

>Betta\_splendens\_XP\_029009113.1\_cryptochro

MVVNSVHWFRKGLRLHDNPALQEALNGADTVRCVYILD PWFAGAA NVGINRWRFLLEAELEDLNSLKKLNSRL  
FVVRGQPTDVFPRFLKEWKVTRLTFEYDPEPYGKERDGAIIKMAQEFGVETVIRNSHTLYNLDR IEMNNNNP  
PLTFKRQTMVSRLELPRRPLMPVTQQQMEKCTQIADNHDQLYSIP SLEELGFKTEGLPPAVWHGGESEALD  
RLNKHLDKKSQVQVWVANLEHSRVNTCSLYASPTGLSPYLRFGCLSCRVLYYNLRELYMKLRKRCSPM SLFGQ  
LLWREFFYTAATNNPNFDRMEGNPICVQIPWDQNPEALAKWAEGR TGFPWIDAIMTQLRQEGWIIHHLARHAVA  
CFLTRGDLWISWESGMKVFEELLLDADWSVNAGSWMWLSCSAFFQQFFHCYCPVGFGRRTDPTGDYIRRYIPI  
LKDYPNRYIYEPWNAPE SVQKAANCVVGVDPKPMINHAESSRLNIERMKQVYQQLSHYRGLSLLASVPTIQE  
EAEPPMTDESQTSSGPDSPHRGPNDCEETGCSMAPDSSTTCPSCCAPPPDPEETLCTASGSKNLNTAASASLT  
QATATPLL PASSVRGPLSRAPSSPSSLSALSLSSSPSPTQASCSSQRRKGLVRKMRRSQRRHRGRQSCATS Y  
REGGGKPEDEEQEEAGGDERMEGDGEQDEERMEEDSTGLNQ

>Betta\_splendens\_XP\_029010221.1\_cryptochro

MVVNTIHWFRKGLRLHDNP SLRDSIRGADTLRCIYILD PWFAGSSNVGINRWRFL LQCLEDLDASLRKLNSRL  
FVIRGQPTDVFPRIFKEWQITRMSY EYDSEPF GKERDAAIQKLASEAGVEVMVQISHTLYSLDKIMELNGGQP  
PLTYKHFQALINHMDPVELPAETITSDVMKTCATPISEDHDEKFGVPSLEELGFETEGLT TAVWPGETEGLM  
RLERHLERKAWVANFERPRMNANSL LASPTGLSPYLRFGCLSCRLFYFKLTDLYRKVKKNSTPPLSLY GQLLW  
REFFYT TAANNPCFDKMEGNPVCVQIPWDRNPEALAKWAEQTGFPWIDAIMTQLRQEGWIIHHLARHAVACFL  
TRGDLWISWEEGMKVFEELLLDADWSVNAGSWMWLSCSSFFQQFFHCYCPVGFGRRTDPSGDYIRRYLPVLRG  
FPARYIYDPWNAPEEVQKAAKCVIGLHYPKPMVHHAESRVNIERMKQIYQQLS CYRGLLLAMVPSNNGSNG  
SNVPGINTESRQGHEDRSIKEGVPHFERQSTQKRRHEEAPSEISSKCWRQSK

>Betta\_spl\_XP\_028986920.1\_CPD\_photol

MSDRKRKATS AAPAPEEPSAKQQKLPSVKKGADAGCCLQDLVDQQRSEKRGMAFN RKVRV FVSGTEKVKQGSK  
GVLYWMSRDQRVQDNWALIHAQQ LAVEEKLPLHVCFC LVPKSELSTLRYYSFMLKGLEEVAQECKSLNIQFH  
LLHGSAGEVLPGFVSDHSFGALVTD FSPLREPLQWLEDVKKKLPKDV PFIQVDAHNIVPCWVASPKLEYAART  
IRGITNLLPEFLTGFPLVEKHPHTAIR TAKPVDWDKTLASLNVDRSVGETAWASAGTRAGMAVLQSFIDERL  
KLFKTHRNDPNAAALSQ LSPWIRFGHLSAQ RVALQVKHCKKGSSSVASFLEELVVRRELT DNFCFYNK NYDS  
VEGAYDWAQQTLKAHAKDKRSYLYTREHLETAKTHDKLWNAAQYQMIIEGKMHGFLRMYWAKKILEWTSSPEE  
ALSIALYLNDRYNL DGDQDPNGFVGCMWSICGIHDQGWAE RPVFGKIRYMNYS GCKRKF DVAKFERSYCPKTL

>Betta\_spl\_XP\_029000458.1\_cry\_circad

MAHSTLHWFRKGLRLQDN PALMAALRDCKELYPVFILDPYLHNKTCMGPNRWRFLIGSLKDLDLSLRKLNSRL  
FVVRGKPGEMLRELFSRWKITKLT YEYDTEPYSLSRDKEVA AVAQE HGVVVYKVSHTLYDVDRIIEQNNGKT  
PLTYKRLQELTRSLGP PPKPI PAPSVENMQDVKT PCSENHEGKYGIPTLEELGHNTASLPEELFP GGQEALR  
RLDEHMRRASWVCSFEKPQTS PNSLSPSTTVLSPYVTFGCL SARTFWWRLADV YQGKHSQPPVSLHGQLLWR  
EFFYTASVGVPNFNRMEGNPVCTQVDWDTNSEYVA AWREARTGFPFIDAIMTQLRQEGWIIHHLARHAVACFLT  
RGDLWISWEEGQKVFEYLLLDGDWALNAGNWQWLSASTFFHQYFRVYSPIAFGKKTDKNGDYIKKYLPLLKKF  
PAEFIYEPWKAPRSVQLAAGCIVGKDYPRPIVQHEVVSKANIGRMKAAYARRPHDAAESP SKSPNNKPGAKRK  
VLSVADMLMKQRKE

>Betta\_spl\_XP\_029004449.1\_cry\_DASH

MSTYRIIICLLRNDLRVHDNELFHW AQTNADYIVPLYCFDPRHYLGTHNYNLPKTGPFR LRFTLESIRDLRNT  
LLSKGSNLVVRGEPERVVAAALIKHLGSVSTVAFQKEVTSEELNVEKNVNDVCDKMKVKVHTCWGSTLYHIDD  
LPFHHISGLPDVYTQFRKAVETQSRVRPVFPMPEQLKPLPPGLEEGE IPTAEALQQTEPVSDARSAPFCSGGE  
SQALARLKHYFWD TDAVATYKETRNLGIGVDYSTKFASWLALGCISPRYIYHQIKQYERERTANQSTYWVIFE  
LLWRDYFRFVAIKYGNKIFQLKGLQDKSVPWKKDMKLFTAWKEGQTGV PFDANMRELAMTGFMSNRGRQ NVA  
SFLT KDGLDWRMGAEWFEYLLIDYDVCSNYGNWLYSAGIGNDPREN RKFNMIKQGLDYDNNGDYVRLWVPEL  
QAIRGADVHTPWTLS TSALSHAGVSLGETYPTPIVIAPEWSRHLNNKARGTGPSPRGKKGPSHTPKQHRDRGI  
DFYFSRSKNL

>Betta\_spl\_XP\_029010334.1\_photolyase

MPRSAAAIDSKAWVRKMIREVLVGREDPEGLFAMCLSVLGPQETR SQFLCLIRPLAAANAELHFR LSSIIYQE  
YFSKFQTEEDELELALALS LMEIKDQDVLSTQSQESRFLQPGDEGLKQTPPENAVGTCAAEAIARGVPVMEEG  
GVHQSEKGNRVKSRRRRHRAARQQAVGLPSSLSAPPPVLLWFRRDLRLCDNPALSASLECGAPVIPVFIWSPE  
EEEGPGTTLATGGASKYWLHQALSCLCASLEHIGSHLVYIKAHGGGAGVGSSLHSLQELIKDTGARTVLANAL  
YEPWLKARDDAVASALQKDGT ELMFHSYCLRDPSVSTEGVGLRGIGSVSHFMSCKQNPASVLGMALDPPA  
SLPAAAQWPQGVSLDTLGLAQMPRRKDGTVINWAADIQKCWDFSEEGAQARLEAFLQDGVYRYHKESGRADAP  
NTSCLSPYLHFGQLSPRWVLQA AKRTCCQTSKFQRKLAWRDLAYWQLTLFPDLPWESVRPPYKALCWSSRRDH  
LKAWQRGRTGYPLVDAAMRQLWLTGWMSNYMRHVVASFLIAYLHLPWQQGYRWFQDTLVDADVAIDAMMWQNG  
GMCGLDHWNFVMHPVDAAMTCDPCGTYVRKWCPELADLSDEFIHKPWKCPI SMLRRSGVVFGQTYPERIITDL  
EERRSQSLQDVAHVRKEFNQYVDKHTGCDLVPLPPRLLSETMGLSQKDDCVVLEGKQFLLPVITRMEFKYQQE  
NPDTDAAANPYNALLKGYVSRKRDE TIAFLNERDFTASVMYEAVQRKERLES DHRRMEGLPEPPALRGKVRRT  
PTAKDKFSIVPGGGA VTSFE

>Bifiguratus\_ade\_OZJ01509.1\_BZG36\_0555

MATLFWFRNGLRVHDNRALLKALDYDLDEKTSCIRNADKKHSALVYPVYIILEPDRLKSGLIGPNRVKYLQVKT  
CHCREAAVDKSAGDPLSKI PKLCADYKVNKL VFERDTDEYCRGRDENIKELMKKCHVQVETYSGHTLWDLDDI  
MDRSGGQLTKSYGPFVKLLEKMPQPQNRFPSIPTMQGTLDPHMATDPKYDLPNVEDYLQGEPTTIHKGGESE  
GLRRLDNYLQDTRTRVFRKPQTSPIDTHPASTTILSPFMKFGSLSCRTFWHRVNEVYKKGQHSAPPESLIGQ  
LYWREFFYSQGEVALLIPWKGYNENKEDEEKFAQAWAEGRTRYPWIDAVMHQLIKHGWMHQLARHCVACFLTRG  
QLFISWEKGAEVFHXYLLDADYNLNNGNWLWLSASAYTTYFRVYSPTKFPQKYGKSDGAKFIRQFVPEVAKL  
PDLYIFEPWKAPPSVQKSSNCVLGKDYPHPIMDAENAKAENMEIMRICYEKKVHGNCSPKEYEDHMALFKIVL  
AKDYNQYNGASNAKAPRKGQINLETAMQQQLAKRTQRQRENN  
>Bifiguratus\_ade\_OZJ06231.1\_BZG36\_0080  
MPAQNRRTSLDEYFRTGGPPLKKEKIEDNVKTESSQSNGGAATETGSATTSIHQALASRWTTTSSNGVANGAF  
YSVKHESLPKPNGKMLNCLHWFRDLRLQDNPAISYATFIANQCQTHACAIYIISPEDMKLHDDAPIKIDFWM  
RNLKCLQQELDKNINPLVIKTVPKRRDIPQVLLDFCDQHGISELTINHEYEVEDEDARDKKVQRLFESKKGKHHVH  
GFHEQCQVIQPGKLMTQSNKPYTVFTPFKRAWLSLVEVHKISPGQFADLQLAPKLEANDVKVRDSNSSSFHTLFT  
DKSLTTIPDSVPGFEMPADLQKTAHQMPAGEADAHSRLDNFVRDKVKLYDKKRSPLGEPYTSTLSPHFASGI  
ISSRQCLQAAVKANNGKLSSGSDGIQSWIQEI IWRDFYRHVLVHYPKVCKNQPFDEGNNIQWATYNEDDEENE  
AFFAWCEGRTGYPIIDAGMRQMNATGWMHNRLRMATAMFLSKDLLINWQRGERYFMQCLIDGDLASNNGGWQW  
AASTGTDAQRYFRIFNPMLQSEKFDKSGDYIRRWPVELKTIRGPAIHDPYHVLDRKAFEALNYPKPMVDHKFG  
RDRALQAYKAAMHAGSAKQ  
>Biomphalaria\_gla\_XP\_013065471.1\_cry\_DASH-1  
MQTASENPSVAICLFRNDLRVHDNEALFTANQKGKFLPLCYCFDPRHHAGTYHFGFPKTGCHRLRFLLESVTD  
LRLKLQSMGSNLIVRLGKPEDVIAELVNKLNLQNNVAVVIQKEVTEEEVKVEQDIRSKCRVPLLTVWGHTLYH  
IEDLPFEPKHLDPVYTEFRKKVEDNLPVRKLINLPVQLNPLPMGIDQGLIPTFPDFGFSVPDRDPRSAFFFIG  
GESSALQRLNDYFWVTDNVSTYKETRNGMIGTNFSTKFSPLAHGCLSPRKIYWELKRYERERASNQSTYWVI  
FELLWRDYFRYVSLKYGNKIFFSGGIKNEPTQWKTNHQHFKAWQEGRTGVPIIDANMRELAATGFMSNRGRQN  
VASFLTQDLQDLWRGAEWFESELLIDHDVCSNYGNWLYSAGIGNDPRENKRKFNVVKQGLDYDGDGNYVRLWVP  
ELAAIKSGKVHCIWTLNNTQLQAGGVLLGQTYNPPIIVAQEWSRHVNRPSSSTSTGASSGKGKKRSSGSQKSL  
EHQGQYPGQKRGLDFYFSHTNPR  
>Biomphalaria\_gla\_XP\_013068586.1\_photolyase  
MPLCPPNYFGLVDGNIWSSSQVDAHNIVPCWVASPKLEYGARTIRSKIHKQLDEFLTEFPPLVKHPHSPEKMP  
EETDWEKADSYLEVNRKVAEVSWAKEGSLRMLSEFCEKRLKYFSSDRNDPNKQALSNLSPWFHFQGQISVQ  
RCILTVKLYRSKSNDSVNAFIEEAVRRELADNFCFYNPYDAVQGTNDWAKKSLDLHRKDKRPYLYSRDQLE  
QSKTHDDLWNAAQTLVNEGKMHGFLRMYWAKKILEWTKSPENALADAIYLNKYNLDGRDPNGYVGCWWSIC  
GIHDQGWAERAVFGKIRYMNQYQCKRKFDPVAFVRKYKRT  
>Biomphalaria\_gla\_XP\_013075939.1\_cry-1-like  
MSDIEKKNHVTIHWFRHGLRLHDNPALLDGLDCEVEFYPIFIFDGNVAGISTAAFFPMQFLLETQLDLDENLK  
SHGSRLYSFQGDPEVIFKKLIEEWGVTRITFEQDPEPVWQDRDTRVKNMCLELEIECIERVSHTLWDPPQI IK  
ENGGTPPLTYAMFCQVADIVGPPPKPREDPNFTGISLPVSEHHDEKYRLPTLAELGVEAECEKQASPYCHYL  
GESKAMKLLSIRLEKERKAFSLNQSLPNQLFPELSGMPMSLSPLHFRGSMSSIRKFYWLLREAYAEVHPNAHIP  
SSITGQLIWREYFYCMSVNNPNYNRMVGNPICLKIDWYDNDNHLKAWKMGMTGYPWIDACMRQLLQEGWIIHQV  
CRHATACFLTRGDLWIDWVKGLQVFDRLYLLDADWSVCAGNWMWVSSSAFEKVLQCPKCICPVRYGRMDPKGE  
YVRRYVPELKDMPLOYLFEPWKAPLKVQEEAKCIIGEDYPLPIVNHKTASRDCQSRMEI IKSFKDVPHIRPA  
NEDEVYTSMMWVCKELEKMDLCRHDNEKLLFNM  
>Biomphalaria\_gla\_XP\_013080710.1\_cry-1-like  
METVSYMLTAWHDGRLMWNTSLYSGIDTVKVPASELWTPDLVPYTSVCYVLEATLRLLTARNNLNLYLFCFFY  
YFRFLLESLEDLSSLRKLNSRLFVVRGQPADVLPRLFQEWGITHLAFEDPEPYGKERDSAISALARELSIQ  
VITRSSHTLYDPKVVI AANGNNPPLTYKRFQSILSKLDPPLQPCALTSAMVAEVTTPVSDHDDRFSVPSLD  
ELGFDVDSLGPQFRGGESEALARLYRHLERKAWVASFERPKMSPQSLYPSGTGLSPYLRFGCLSPRLFYWKL  
IELYKKVNIVLPLFLIQLLWREFFYTATNNPNFDRMVGNSICVQIPWDHNPEALSKWAEGMTGYPWIDAIM  
VQLRKEGWIIHLLARHAVACFLTRGDLWISWEEGMKVFDMLLDADWSVNAGMWMWLSCSAFFQQFFHCYCPVG  
FGKRADPSGDFVRHYLPILKGFPTQYIIEPWTAPEVSQKAAKCIIGKDYPLPMVQHTACRVNLERMRQVYKR  
LVLKSTASKRMFLDLPKIPKVSFLSKAKMFLSSSSDEDMSQKQRRRKVDE  
>Biomphalaria\_gla\_XP\_013089589.1  
MVASFLVNKLNIHWHIGRDWFNCLFDADLGNSTSWQWVSGCGVDPVPYFRIFNPITQGEKFDKNGEYTRK  
YVPELMYMPDSYLFKPPWMAKESILKSANVIGKSYPAPIVDLISSRNSAL  
>Biomphalaria\_gl\_XP\_013065770.1\_cryptochro  
MSKYKVIHWFRKGLRLHDNPAFLKAIEESTEYIPVFLDPWFVTSSAIGINRWRFLLQSLVNLDSNLKMLNLR  
LFVVKGKPEIEIKRLCQEWKINRLTFEVDTEPYAVQRDKIVEEIVQAMGVEVIKCVSHTLYDVHRTVQTNGGK  
APISYQGFQAVLSKLGPPAPALPAPTADLSGCKTPISTHEKDYGVPTLSDLKKSETDCGPLLYPGGETEAL  
DRMERHIKKINWICTFEKPNTSPNSIIPSTTVLSPYLKFGCLSARLFYHKLADVYSGKKHSQPPVSLHGQMLW  
REFFYTGVAVTKNFDRMQGNSVCKQIPWGSNKEHLLAWTHAKTGYPFIDAIMTQLRLEGWIIHLLARHAVACFL

TRGDLWISWEEGQKVFEELLLDADWSLNAGNWMWLSASSFFYQYFRVYSPIAFGKKTDPNGDYIKKYLPVLKK  
YPAKYIYEPWKAPLSMQQTAGCVIGKDYPKPIVDHDTV RKENIKMTEAYALDKQTKEQKVLPRNGHQIQDPN  
QALQ

>Blattella\_ger\_PSN30513.1\_cry-1

MSEETTNRSKVSVLWFRHGLRLHDNPALLEAIRDTDEFYPIFIFDGESAGTKAVGYNRM CYLLEALNDLNEQF  
KKYGGKLYVFKGSPTQIFKRMWEELELGKICFEQDCEPLWYNRDSSVKT MCKELNINCVEKVSHTLWEPKAVI  
ETNGGSPPLTYQMFLHTVSVIGPPRPVSDVNWNNTVTFGKLPDYLAEEFKMFPEIPHPEDFNI FREAKTEKLI  
RWDGGETKALKQLLDRLDVEESA FRQGYL PNQAQPDLLGPPTSLS PALRFGCLSVRRKFPSISVPNKSTIHH  
LVCKVRKTGTFADKKRNRKRTVLTEEKLDDIGACFEQSPHKSLSKLTQQITHKDYNPHTLDELKENIRQQIAL  
ISMDELQRVFRNFRKRCEACIRHGGRHVHDLFNEVHKGEPPACQNITGQLIWREYFYTMSVNNEFYAEMERNP  
ICLNIPWHDGDDIETGHLAKWKQGKTGF PFIDAVMRQLLQIGQFVLAIGCGFQVLLNNFWIVHIVSVLSIMD  
VVLTHGEIIRYVPELNNYPVEYLYEPWKAPIEVQE KAGCVVGRDYP ERIVDHLKASEQN RADMNKIILGNIYS  
YREN RVILL

>Blattella\_ger\_PSN38921.1\_C0J52\_1186

MASKTKMKMLDMPASSSSQLSKTDFFLKLKEDRTTASESVMEFKFNKKRVRVLSEAAEVPERAEDNWAMLYAQ  
KLALKNEVPLHVSFCLVPKFMDATIRHYQFMLKGLQEVAAECKDLNIQFHLLLGQAVNILPKFVMQHKGMAVV  
TDFAPLRVPTKWVKDVQAALPKDVPFCQQAESILEVDRSVKAVTWATPGTKAGLEV LHSFCTSRLKLFASKRN  
DPNANALS NLS PWFHF GGYN YLRKGLNTVVQVLEKGMYP LLSRIAALVAEAVRNSFQSASAIRTNSQFPGSTR  
TALRRLKDEKLFARIAANKELLKDEHKLFRLAFSEENTNRNWNRLIFSDDVTFSS TNGGKVIVYRPRGAGYDE  
RYVAKQIRRESVDAFCEEAI VRRELADNFCFYNEKYDSL DGAYDWAKIT LEAHRKDKRQYLYTREELEKAVTH  
DDLWNSAQLQLVQEGKMHGFLRM YWAKKILEWTESPKKALADAIYLNDRFSIDGRDPNGFVGCMWSICGIHDQ  
GWAERP IFGKIRYMNYEGCKRKFDIAAYIIK WG GKKHKK

>Blattella\_ger\_PSN44595.1\_cry-1

MENGIKTSVLPQARLEGLWLLDGF PFEICARFLVGILPIVPTTMFRRF GSEFAQTELASVCHKRTTCRCTPKT  
IQAPLTYHQFQT VVASMGPPPPAEPSITQKSINGTYTPIGEDHDDKFGVPTLEELERKAWVASFGRPKMTPQS  
LLASQTGLSPYLRFGCLSTR LFYYQLTDLYKKIKKACPPLSLHGQLLWREFFYCAATKNPKFDRMIGNPICVQ  
IPWDKNAEALAKWANGQTGF PWIDAIMTQLREEGWIHHLARHAVACFLTRGDLWISWEEGMKVFEELLLDADW  
SVNAGMWIRYLPVLKNFPTRYIHEPWNAPESVQKAACIVGKEYSLPMVNHAVASRINIERMKQVYQQLSKYR  
GPGTEEESSAKGCTTVGLLATVPTSQSQSTN ILNPM LHMREFKKSPPLEPKWERSPPDNAMNGHSPTYGEDPT  
KGIQLNCYQLQQQQQQMQIQNPHHQKQENEECE

>Bodo\_sal\_CUG26768.1\_DNA\_photol

MALRRTQLLWWASSSSRRLTRHLHNNPNNVFSLQDTVAIDDGIIH HFDSPPM SHVVTPPAFQPMPGSSVSTDD  
EVMQSQASSVVAHATTEVAVTRRHAAQQRSTKALAAFHQ RQLGILELWKS LPPLAAGYP AESSVGVCYWLNDL  
RVHDHYPLALACRRAKETGGVPV VAMMCLDPRCFAQPSQILGCYRMGPERAKFTLECIASLRGELGALGVPLV  
IRIGLPEVILPTLFAQLRCHHVYTTTQYAPHEKVIHDSLQLTAAQVHSVWHTTLVHVDDLPTPLASMR TGFR  
WFHDDAVMATIRPTKPYDCSDALKELPSVL PFFQAFDEDNGR TTRSTTHNSKLKTHNP SHQRAVGETSISEEG  
MGALPTMADLGYGSYP ELAVTHVIATSSSHHG GERSATQRLEEWLEQGGMKRMVKLG VVKRPTVDMYATNLL  
RISPYLSTGCMSPRRLYERLREYAYDNVMDGSSQSQFQEAMLR LFRRDYFHFQGLLHGNSMFYSYGPTPENTD  
EAPDWRYDDKLLRRWCNGLTGFPFADAA MRELLATGWVGAPGRQALMWLLSIGLEQDW RAGA EWFERCSLD FD  
PFVCYGNAAAYSKLTPDDYDDAVH THHYLAGMHDQTGIYIKKWL PQLSKVPSVYIHRPHVM SERMQEMHGVFL  
GKTYPIPIKLWDGAQSTMGPSQLTAYFETAEQRRSRGPM EALEFSRDKMAPLSSLHLTTGPQRYRNVASAM LH  
ISENMEVDDDENVLVPASRQLKDDAMHLATMAHSINN

>Bodo\_sal\_CUG86883.1\_photolyase

MSSKRSRSPSAEMSPTKAHRPDKMRINVFLFRDLRVADNTALIH LAKQHPQTPILPAFFFNPMQIDPKQNPY  
YGAPCVRFMFESLKDNLQLDDRLVLLHGSDEECFKTLQKKFDIENISFN RDYTPFAQLRDAALDEWCKVNHV  
QVCSSVQASLWDYSLPLDCVKSGAEKPYAMFTPYYNKVMAAHLHQVPS PASESDTTAVKLLISAKIKSTLF  
DRVAESLIDSLPTNPDSVPVQGGRTNALWRLEHVLPDMKQYETQRNFLSPQRTSLLSPFMKFGCVSVREVYAAA  
AAAYGAKSCFVKELFWREFYAMLLFNNPVL CAGQLSPLSKVKAEGNMPFQEKFA PFRWKHPETTQH WVA FQQ  
GKTGVPLVDAAVRCLNATGWCHNRNRMVIGSFATKVL FVDWRICEQWFATKAVDYDVASNSGGWQWCSGQAD  
AMPYFRTFNPFQQA KKFDESCDFIKKWVPELKEVDKKV IIAWNEKGTTTLSKTTGYPLPIVDVRESTKR VIAE  
YGIITSVT TXXXXXXXXXXXXXXXXXXXXXXXXXXXXXXXXXXXXXXXXXXXXXXXXXXXXXXXXXXXXXXXXXXXX  
XXXXXXXXXXXXXXXXXXXXXXXXXXXXXXXXXXXXXXXXXXXXXXXXXXXXXXXXXXXXXXXXXXXXXXXXXXXX  
HLRTLFXPAAVDMQILYRVPVATHGDATVVHVNSESD FQVGLQVWNDSIRPLQLARQEPLLA AFEALASSGAPQ  
TVISPLPAPTGSGAPSSFVTPKKKSTRAPAPDNSTADVSSILPSTPQQVQQQPTAIGTDWYHSREKASNLLSS  
FAPESPDPTTIRITL RAGQASSRIRLHPYNRPDVNDLRQMVQSELLRRLTSAEQEQILSGMSNSTVKFLMYV  
NTPAAPVDIDVEDNTDVTFCDEIKKYGNDYSVQLMCEWVDATEVPCAREDVRLVETDLVEVVLPPRSALT FN  
LAHTPKREHHEVKIDMGEE

>Boleophthalmus\_pect\_\_XP\_020781257.1

MSTARTIICLLRNDLR LHDNELLHWAQRHAEHIVPLYCFDPRHYEGTYYYNF PKTGPFRLRFL LDSVKDLRNT  
LVTKGSNLIVRQGPEDVVADLIKQLGTVSTVAFHEEITSEELNVEKNVKLVCAQMKIKVQSCWGSTLYHRDD

LPFNHISRLPDVYTQFRKAVESQSSVRPIFPTPEKCLKPIPPGLEEGAIPATAEDLKQTEPIDDLRSAPFCRGGE  
SEALARIKHYFWDटनावात्यकेत्रंग्लिगव्दयस्तकलपलालगसिप्रयिह्योक्तयेाqrtanqstywvife  
llwrDYfKfVAlkyGNRMFHinglQnksVPWKKDMKLFNTWKEGRTGVPFVDANMRELAMTGfMSNRGRQNVa  
SfLTkDLGLDWRMGAewfeyLLIDYDVCSNYGNWLYSAGVGNDPRENrkfNMIKQGLDYDNNGDFVRQWVPEL  
QAVRGSDVHMPWTLSSPALSNAQVSLGETYPVPIVMAPEWSRHVNKKQPGGASGSSHRGKKGPSHTPKQHkDR  
GIDFYFSKGKGF

>Boleophthalmus\_pect\_\_XP\_020786820.1

MVVNTIHWFRKGLRLHDNAALRDSIRGSDSLRCIYILDpWFAGSSNVGINRWRfLLQCLEDLDASLRKLNSRL  
FVIRGQPTDVFpRLfKEWQINRLSYEYDSEPFgKERDAAIQKLACEAGVELMVRISHTLYNLdKIIElNGGQP  
PLTYKRfQGLINHMGPVELPAETITAeVIRTCVTPIGHDHDDKYRVPSLEELGFETEGLVTAVWPGGETEALM  
RLERHLERKAWVANFERPRMNANSLLASPTGLSPYLRFGCLSCRLfYfKLTdLYKKVKKSSHPPLSLYGQLLW  
REffYTTATSnpCFDKMDGNpVCVQIPWDRNPEALAKWAEGRTGfPWIDAImTQlRQEGWIHHLARHAvACfL  
TRGDLWISWEEGMKVFEETLLDADWSVNAGSWMWLSCSSFFQqFFHCYCPVGfGRRTDPNGDFIRRYLPILRA  
YPaKYIYDPWNAPEdVQKAaKCIIGLHYPKPMVNHAeASCINIERMKQIYQQLSCYRGLGLLATVPANLSNGT  
SQGPVGpVEEPSVLERPPRTERPQSAQKRHEEPLTEGNAKSWRPSK

>Boleophthalmus\_pect\_\_XP\_020790376.1

MSedVSTVQnksVLNIQNSDQSSRQSSPSSKQNSSEPKRskRRRQRskGTGQQVVGLPTAPSSQPPVLLWfRR  
DLRLCDNPAMIGALEIGAPVIPVFIWAPDEEEGPGTTVAMGGACKfWLHQALSLRSSLERIGSSLVfLKAES  
GSSLQTLRGLLQETGACTVVANALYEPWLKQRDDLVLSGLHKDGVGLKMYHSYCLRDpYSVSTVGVLGRGIGS  
VSHfMScCKQNPgpPLGATLDPPVSLPTPSHWPLGVTLDtLEAKMPRRKDGTIIDWAANIRKSWDFSEEGA  
AQlFTfLQDGvYRYEKESGRADYpNTSGLSPYLHFQGLSPRWLLWDAKEAKCRPPKfQRKLAWRDLAYWQLSL  
FPDLpWESLRPPYKALRWSSNQSHLKAWQRGRTGYPLVDAAMRQLWLsgWMNNYMRHVVASfLIAYLHLpWQE  
GYRWfQDTLVDADVAIDAMMWQNGGMCGLDHWNfVMHPVDAAMTCdPCGAfVRQWCPELADLPDELIHKpWK  
PASMLRRAGVVLGQSYPERIITDLEERTQSLKDVAQVRLQfKQYVDQGSgcdLVPLPPRLfLLPLITRMEfK  
HQLEEPDADAVSNPYNAVLKGYVSRKRDEtIAfLNERDfTASVMNEGSQRrERMDVNyRKMEGLPQsREPRGR  
ARRTPTAKDRfSIVPGAVVNTLR

>Boleophthalmus\_pect\_\_XP\_020790995.1

MVVNSVHWFRKGLRLHDNPALQeALNGADTVRCVYILDpWFAGAAANVGINRWRfLLEALEDLdNSLKKLNSRL  
FVIRGQPTDVFpRLfKEWNVTRLTfEYDPEPYgKERDGAIIKMAQEFgVETLVRNSHTLYNLdRIIEMNnnNP  
PLTFKRfQTIVSRLELPRRPLPPITPQQMDKCHTKISDNHDQLYNIPSLLEELGFRTeGLPTAVWRGGESEALE  
RLNKHLdKKVWVASIEHPRVSTCSLYASPTGLSPYLRFGCLSCRVLyYNLRELYMKLRKRCSPPLSLfGQLLW  
REffYTAATNNPNfDRMEGNPICVQIPWdQNPEALAKWAEGRTGfPWIDAImTQlRQEGWIHHLARHAvACfL  
TRGDLWISWESGMKVFEELLLDADWSVNAGSWMWLSCSAFFQqFFHCYCPVGfGRRTDPTGDYIRRYIPILKD  
YPNRYIYEPWNAPEsVQKAANCvGVdYpKpMINHAEGSRlNIERMKQVYQQLSHYRGLSLLASVPTIQEEAE  
PPMTDESQTSSGPDSPPKLSdVEAAGCSTAPDSSTMDPFSfSVSPYtALDEttCPKNEPPTAISSTSPDPMT  
AQPKPSSPASpSPNVAPSPGRSTSLGPRRKGMARKTRRSQRQRVRQNCATATKEGDRRTDDESrDSTTTEDKM  
EEEIEQDDEKMEEEmLGGEStGHlQ

>Boleophthalmus\_pect\_\_XP\_020795196.1

MVtCLIQSEfSLCMRYTfFRtFCVtAPKGLLKcPLNTPLCPHFDQfHSFRCKPIMSQKRKATTDAGAEKPNKQ  
PKITSEKKAAGWLQEQVLKQRAEKkEMfKNKKRLRfLTDTQKIKQGAEGILYWMNRDQRVQDNWALIHAQRLA  
LKEELPLHVCfLLVPKSKLSTYRHfSfLLKGLEEVsQELKTLGIEfHLLHGPPGEVLPGfVSDRSLGAVVTD  
FSPLREPLQWLEDLKKKLPKDIPfIQVDAHNIVPCWEASPKLEYAARTIRGKINKVLPEfLTDFPLVEKHpyI  
AIRtAQVDWAKVLASLQVDKTVGETDWAkPGTKAGMAMLESfIDVRLKLfATQRNDPNAAALSQLSPWIRfG  
HISAQRVALQVKKKGGEssAPfIEELVVRRELTdNfCYNKKYDSIKGAYDWAQKTLKDhAKDKRPYVYTQDQ  
LEKAKTHDDLWNGAQfQMISEGKMHGfLRMYWAKKILEWTSsPEEALSIALYLNDRYSLDGQDPNGfVGCmWS  
ICGIHDQGWAErPIfGKIRYMNYKGCQRKfDVARfEKYRPKDL

>Boleophthalmus\_pect\_\_XP\_020797397.1

MSHTCIHWFRKGLRLHDNPALIAALKECKELYPVfVLDPYLYNNAfGLNRWRfLIGSLRDLDcSLKKLNSRLf  
VVRGKPEDVfPGLfKKWkVSKLTyEYDTEPYSLSRDQTVTKLAKEHGVEVIYKVSHTLfDINRIIEANNGKPP  
LTYNRMQAIVSDLGSPKXXXXXXtMDDVKNMSTPYSKDHEEEfEVPKLDELGHDISSIPEELfPGGEVEALKR  
LDEHMKKTQWVCNfEKpQTSpNSLIpSTTVLSPYVTFGCLsARTfFWRLADVYQgKKHSSPPVSLHGQLLWRE  
FFYtASLGIPNFNKMKNpVCTQVDWDNNPEFLAAWREARTGfPFIDAImQLRTEGWIHHLARHAvACfLTR  
GDLWISWEEGQKVFEELLLDGDWALNAGNWQWLSASTfFhQfFRVYSPVAFgKKTdKNGDYIKKYLPllKKfP  
PQYIYEPWKAPrSVQQAAGCIIGKDYPKPIVEHEVVSKKNIQRMKLAYAKRSADKPESpSKKQGVKRKAPSVV  
DMLNKKAKQ

>Bombycilla\_garr\_\_NXN81953.1

MGVNAVHWFRKGLRLHDNPALRECIQGADTVRCVYILDpWFAGSSNVGINRWRfLLQCLEDLDANLRKLNSRL  
FVIRGQPADVFpRLfKEWNIAKLSIEYDSEPFgKERDAAIKKLASEAGVEVIVRISHTLYLDdKIIElNGGQP  
PLTYKRfQTLISRMEPLEMPVETITPEIMKKCTTPVSEDHDEKYGVPSLEELGFDTDGLPSAVWPGGETEALT  
RLERHLERKAWVANFERPRMNANSLLASPTGLSPYLRFGCLSCRLfYfKLTdLYKKVKKNSSPPLSLYGQLLW

REFFYTAATNNPRFDKMEGNPICVQIPWDKNPEALAKWAEGRGTGFPWIDAIMTQLRQEGWIHHLARHAVACFL  
TRGDLWISWEEGMKVFEELLLDADWSVNAGSWMWLSCSSFFQQFFHCYCPVGFGRRTDPNGDYIRRYLPVLRG  
FPAKYIYDPWNAPESVQKAACKIIGVNYPKPMVNHAEEASRLNIERMKQIYQQLSRYRGLGLLATVPSNPNGNG  
GLMGYSPPGESISGCGSTGGAQLGTGDGHSVVQSCALGDSHTGTSGIQQQGYCQASSILHYAHGDSQQSHLLQA  
GRTALGTGISAGKRPNPEEDTQSVGPKVQRQSTN

>Bombycilla\_garr\_\_NXN82933.1

CIYILDPWFAASSAVGINRWRFLLQSLEDLDNSLRKLNLSRLFVVRGQPTDVFPRLFKEWGVTRLTFFEYDSEPF  
GKERDAAIVKLAKEAGVEVVIENSHTLYDLDRIIELNGHKPPLTYKRFQAIISRMELPKKPVSTVISQQMETC  
KVDIQENHDDVYGVPSLEELGFPTDGLAPAVWQGGETEALARLDKHLERKAWVANYERPRMNANSLLASPTGL  
SPYLRFGCLSCRLFYRYRLWELYKKVKNRSTPPLSLYGQLLWREFFYTAATNNPKFDRMEGNPICIQIPWDRNP  
EALAKWAEKGTGFPWIDAIMTQLRQEGWIHHLARHAVACFLTRGDLWISWESGVRVDFEELLDADFSVNAGSW  
MWLSCSAFFQQFFHCYCPVGFGRRTDPSGDYVKRYLPKLKGFPSRYIYEPWNAPESVQKAACKIIGVDYPKPM  
VNHAETSRLNIERMKQIYQQLSRYRGLCLLASVPSCVEDLSGPVTDASGQSCSTSTAVRLSQADQASPKRKH  
EGAEPECPEELYKRAKVTGLPASEIPGKS

>Bombycilla\_garr\_\_NXN85679.1

DNWAFLYAQRALAKQELPLHVCFLVPKFLEATIRHYRFMLRGLQEVAEECAELNISFHLLLGAKDVLPTFV  
AEHGVGGLVTDIFSPLRLPRQWVEDVKERLPEDVPFAQVDAHNIVPCWIASPKQEYSARTIRGKIHAQLPEFLT  
EFPPVVRHPPHPPSCAAEPIAWEACYSSQLQVDHTVKEVEWATPGTAAGMAVLKSFIAERLKSFSSTHRNDPNKAA  
LSNLSPLWLHFGQVSTQRAILEVQKHRRHYKDSVDAFVEEAHVVRRELAENFCYYNENYDSVQAYDWAQTTLKL  
HAKDKRPYLYSLQELEQGTTHDPLWNAQLQMVGEGKMHGFLRMWAKKILEWTRSPEEALQFAIYLNDRYEL  
DGRDPNGYVGKCRMGRGCLWSICGIHDQGWAERPVGFKIRYMNYAGCKRKFDFVEQFERRYAPTH

>Bombycilla\_garr\_\_NXN88810.1

LCSPSVLKVDYDVCSNLYSAGIGNDPRDNRKFNMIKQGLDYDNGNDYVRLWVPELQGIKGADIHTPWAL  
SSAALSQAGVTLGETYPWPVVTAPESWRHIPQRPGGSPHPRGRGPAQHKDRGIDFYFSRKKDV

>Bombycilla\_garr\_\_NXN90577.1

QAKHHSLLPPVSLQGQLLWREFFYTVASATPNFSQMAGNPICLQICWYKDTEKLHKWKMAQTGFPWIDAIMTQL  
RQEGWIHHLARHAVACFLTRGDLWISWEEGMKVHCVLLFSSVLPSP

>Bombyx\_mor\_NP\_001182627.1\_cry\_2

MSAAPETLPPPSAQAHTPARPHMSAPRRTPGKHTVHWFRKGLRIHDNPALREGIIDAFTFRCVFIIDPWFAS  
SSNVGINKWRFLQLCLEDLDKSLKLNLSRLFVVRGQPADALPKLFREWGTALTFEEDPEPYGRVRDHNIISK  
CREVGITVTSRVSHTLKLDKIIERNGGKAPLTYHQFQALIASMPPPPPAEVTITPQMLNGATTPTITDNHDDR  
FGVPTLEELGFETEGCLKPPIWIGGESEALARLERHLERKAWVASFGRPKMTPQSLLASQTGLSPYLRFGCLST  
RLFYQLTELYKRVKVRPPLSLHGQILWREFFYCAATRNPNFDRMEGNPICVQIPWEKNQDALAKWANGQTG  
YPWIDAIMIQLREEGWIIHLSRHAVACFLTRGDLWISWEEGMKVDFEELLDADWSVNAGMWMWFSCSSFFQQF  
FHCYCPVRFGRKTDPNPDFIRKYIPALKNMPTRYIHEPFWMAPESVQAAAQCSIGRDYPMMPVDHTKASQINIE  
RIKQVYAQLARYKQPATLNANAVQRPVNLQSSPSPTSIIASINQSNFLCSQTPDPQNATSHSFKEPSDTFFIN  
KKNKDTESNQTRYKRVIIVQKTRNSNVEINVSAPQDRRASDNYITINEGDPAHSTDAKKQENNYDFKNLAIDN  
HIRGFNNIQNINSQYYLTNYSTKKKETEIKNETDEGPFVRPESYGTDRAYTINRCPSMSNEKEFETPKENLKQ

>Bombyx\_mor\_NP\_001182628.1\_cry\_1

MLGGSVLWFRHGLRLHDNPSSLHSALEETSGPFFPIFIFDGETAGTKVVGYNRMRYLLEALDDLDKQFKKYGGR  
LLLVKGKPSAVFRRLWEEFGIRKLCFEQDCEPVWRPRDES VKTACREIGVTCREHVSHTLWEPDTVIKANGGI  
PPLTYQMFLHTVATIGDPPRPVDNAKLGRIGFGLPLCFYEEFTVYDKVPNPEDLGVFLENEDIRMIRWVGGE  
TAALKQMQRHLAVEYETFCRGSYLPHTHGSPDLLGPPISLSPALRFGCLSVRKFYWSLQDLFQQVHQGSLCSTQ  
YITGQLIWREYFYTMSVNNPHYGQMTDNPICLDIPWKSPEGDELERWASGRTGFPFVDAAMRQLRLEGWLHHA  
VRNTVASFLTRGTLWLWSEHGLAHFLKYLLDADWSVCAGNWMWVSSSAFEALLDSGECACPVRLGQRLDPSGE  
YVRRYVPELARVPTEYIYEPWKAPLDVQERANCIIGKDYAPVNVHIVAAQRNRNAMEDTKMEKNHAKQGRGP  
LASSNSGRRWNSPLDYQQTGREKIY

>Bombyx\_mor\_XP\_004930027.2\_photolyase

MLHIPLVNQFNTVLKRYSVFIMASASKRKRTSIPMALGKSNESTSTIEEFLKKLQKKREETAESILNFDNFNKK  
RIRIISQEQIIPDDCDGVVYWMRDSRVQDNWAFLLFAQKLALKNEVPLHVCFLISKYLDASLRQFHFLVKGL  
EKVAAECKKLNIQFHLLEGSGAEVLPQWVVDHNIGAVVCDFNPLRVPMGWLDGVKGKLRKDVPLIQVDTHNVV  
PCWVASDKQEYSARTIRNKINSKLEFLTEFPPIKHPYSSKFEEAEPIDWHEAIEETREADKSVGPVDWAKPGY  
DEAVKMMKSFLDKRLNIYASKRNDPTQDALSNLSPWFHFGQISVQRVALCVQEYKSKFTESVNAFLEEAIVR  
ELADNCFYCEHYDSVKGASAWAQKTLDDHRKDKRTHIYTLKLSKGETHDDLWNSAQLQLVKEGKMHGFLRM  
YWCKKILEWTPTPEDALKYGIYLNHYSIDGRDPSGFVGCWWSICGIHDQGWAERAVFGKIRYMNYDGCKRKF  
DIKAFIARYGGKVHXYVPKK

>Bombyx\_mor\_XP\_037874830.1\_cry-1

MSKTPTVIHWFRLDLRIHDNLALRNAINEAENRKHLRLPIYFLDPNIKDKVGINRLRFLQLSLEDLDNNLKKL  
NTCLYVLRGKAVDLLPKLFDWQVKYLTQCQVDIDPEFVQQDEYIEDIAEKKGVFINKRVQHTVYDVHKVLREN  
NGAVPLTYQKFLSLVKSINVKEPIEISNVLSSHCKPIDIQSENYSIPNLKELQIDEETLAPVKYHGGETEALK

RLNLYMSKKEWVCKFEKPNSSPNSIEPSTTVLSPYISHGCLSAKLFYYKLKEVENGRQHTLPPVSLMGQLMWR  
EFYYTAGTGVANFDKMGVNAICIQIPWTKNDAFLKAWAEGKTGYPFVDAIMRQLKQEGWIHHLARHMOVACFLT  
RGDLWISWEEGAKIFEDYLLDYDWSLNAGNMMWLSASAFFYKYFRVYSPVAFGQKTDKEGVYIKKYVPELKKY  
PRE

>Bos\_taur\_\_DAA29534.1

MGVNAVHWFRKGLRLHDNPALKECIQGADTIRCVCYIILDPWFAGSSNVGINRWRFLQCLELDANLRKLNSRL  
FVIRGQPADVPRLFKAWNITKLSIEYDSEPFQKERDAAIKKLATEAGVEVIVRISHTLYDLDKIIELNGGQP  
PLTYKRFQTLISKMEPLEIPVETITSEVIEKCTTPLSDHDEKYGVPSLEELGFDTDGLPSAVWPGGETEALT  
RLERHLERKAWVANFERPRMNANSLASPTGLSPYLRFGLSCRLFYFKLTDLYKKVKNSSPPLSLYGQLLW  
REFFYTAATNNPRFDMEGNPICVQIPWDKNPEALAKWAEGRGTFPWIDAIMTQLRQEGWIHHLARHAVACFL  
TRGDLWISWEEGMKVFEELLLDADWSINAGSMMWLSCSSSFFQQFFHCYCPVGFGRRTDPNGDYIRRYLPVLRG  
FPAKYIYDPWNAPEGIQKVAKCLIGVNYPKPMVNHAEEASRLNIERMKQIYQQLSRYRGLGLLASVPSNPNGNG  
GLMGYSPGENIPGCSSNASCTQGSGILHYAHG

>Bos\_taur\_\_NP\_001276715.1

MAAAAAAATQAPAARGDGASSVHWFRKGLRLHDNPALLAAVRGAHCVRCVYIILDPWFAASSSVGINRWRMMKN  
EATQSLLRVLTQLWRKLASGGQLPCHMEWGVTRLTFEYDSEPFQKERDTAIMKMAKEAGVEVVTENSHTLYDL  
DKIIELNGQKPLTYKRFQAIISRMELPRKPVGSVTSQQMEGCRAEIQESHDETYGVPSLEELGFPTEGLGPA  
VWQGETEALARLDKHLERKAWVANYERPRMNANSLASPTGLSPYLRFGLSCRLFYRLWDLYKKVKRNST  
PPLSLFGQLLWREFFYTAATNNPRFDRMEGNPICIQIPWDRNPEALAKWAEGRGTFPWIDAIMTQLRQEGWIH  
HLARHAVACFLTRGDLWVSWESGVRVDELLEDADFSVNAGSMMWLSCSAFFFQFFHCYCPVGFGRRTDPSGD  
YIRRYLPKLKGFPSRYIYEPWNAPEIQKAAKCVIGVDYPRPIVNHAEEASRLNIERMKQVYQQLSRYRGLCLL  
ASVPSCVEDLSNPVAEPSSIQAGSSSSVGPRLPGGPASPKRKLEAAEEPPGGELSKRARVAESLPSELPSRG  
V

>Brachionus\_caly\_\_CAF0775459.1

MPKGTGIHWRHGLRIHDNPALVACQDEVERFIPIFIFDGKTAGTDVCGYLRFRLQLSLQDLENQFASNGINF  
MCFHGEPEHEILEKLIKWEVVRVISFEKDSESTWHKRDILVKEMCSKNNVQVIELVSHTLYDPEEIFSINSNSP  
PNTCEELRKSCYKIGNPEQPIPRPDLKFLSAHLLSTNDLYIPEIHKVPNVEYFGLKPECKEQEFCLFPGETK  
ALELCHSRIQYEEKESFKSGKINPNLSKPVLFTEKISLSPYLRFGLSIRKLYWDLKKAYVNFTGPRNLYCPA  
EQLEWREYFYQLSYKNENFAQVDGNHMCFKIPWDYGYKQDLFLKWEQGQTGF PWIDACMRQLVQEGWIHHVCR  
NSVALFLTRGVFLFLSWERGMKTFFKYQIDADWSVCSGNWNWIATGDPEEILNSANTFCPVKYGKKIDPQGNYYI  
KKYVTELKDFPLEYLNPEPWKAPLDIQEKSNCIIIGKDYPEPIVDYEEAFKENIAKLQQFFHSEKKEIFETFLND  
KNALKPANSQEYRAYTFAKFLESEKSSKQSSKLSARDNSSVPDLEQFL

>Brachionus\_caly\_\_CAF0961683.1

MPPKKSITKESVNDTKPLIKTEIKKEPEPTQSLNSDNLKMEKVTNCIYWFRKALRLHDNPSSLNAIEKSQY  
IYPIFILDVPWFVQHSKVGPNRWRFLLESNDLDEQLKRKNSRLILIRGQPKKVFTTEKIKAWNINLICFESDTE  
PYAKKRDEEITSLANELGVRVETKYGHTLYNPEYVYKKNNGKVPLQYQSFLGILAKIGDPPKPLDELSGMFK  
IEIDYDLYKVPDLESIGVDSSKCGPRLYPGGETEALRRFEKFKNDSSWVCAFEKPNTSPNSLQPSSTTVLSPYL  
KFGCLSSKKFYWRKLQVYAKKKHSLPPVSLEGQLLFREFFYVGSYTPNFDKIEGNTVCRQIKWDDKPEYVQA  
WKEARTGYPFIDAIMTQLRTEGWIIHHLARHAVACFLTRGDLVCSWEKGQEVFEYLLDQDWSLNAANWQWLSA  
STFFHQYFRVYSPIAFGKKTDDNGDYIRKYLPIKSFPTKYIYEPWTAPLEIQKRHNCCIIGKDYPRPIVDHNI  
ISKINISRMKKAYEETKATAAADGEEEDGKKTTPTSKSVKTVAKSEKTSPPDSRPPSKRAK

>Brachionus\_caly\_\_CAF1108553.1

MSKVPSPGVKKAASSKQLKLDKLVISPGKTSRPFDEDSPEQEPPAKKPNSRLNSEDETDSSKKTNFPIFKSAFQ  
APNLEAISECTLAEEIRKKRHELFEVSNAFRFNKKRVQVLTEVKEFPENSKGILYWMSRDQRVQDNWSLLYAQ  
KLALKQNLPLYVCFCLVPTFLNATIRHYIFMLEGLKEVEKELNELNIQFHLLIGQAKDQVPKFIQENKIAGLI  
CDFSPLRHKNWVEELKKNLPDNI PFAQVDAHNVVPCWIASDKLEYAARTIRNKINSKLDDYLTEFPPIKHP  
VVSEIEKKTIDWEACYSSLQVDQSVKVVKWARPGYLGAIKNLEDFIKNKIKFYDSEKNDPNKNALSNMSPWYH  
FGQVSVQRCMLEVKKYASKNSEAVKALMEESIVRRELADNFCYYQPNYDNLEGAYDWAKLTLEAHRKDKRPAL  
YSLSELENFKTSDRLWNASQIQLRVEGKMHGFLRMYWAKKILEWTESPEQGLEAYIYLNDKYSLDGRDPNGYV  
GCMWSICGIHDQGWAERAVFGKIRYMNYEGCKRKFDVERFITRYARKSEI

>Brachionus\_plic\_\_RNA12022.1

MSKLPTNVKKAATKQLKLDKLVISPGKTARARSKSPEQGPPRKKPNSQLNSEDEVEAKKQETKQTFPVFQSG  
MAASTGNTKSPCQLAEIEKCRNELFESVNAFRFNKKRVQVLTEAREFPEDAQGIYWMSRDQRVQDNWALL  
YAQKLALKQNLPLYVCFCLVPTFLNATIRQYHFMLEGLKEVQKELTDLNIQFHLLIGLAKDQVPKFVAEHKIG  
GLICDFSPLRTHKNWLQEMRKNLPSNVPLAQVDAHNVVPCWIASDKLEYAARTIRNKINSKLDEYLSFPPVI  
SHPVPAQIDCKPIDWDACFKSLECDQSVKIVKWASPGYLAGIKNLEDFIQNRLKNYDSRNDPNKNLSNMS  
WYHFGQVSVQRCMVEVKYASKFSNSVKGLMEETIVRRELADNFCYYQPNYDNINGANEWAKISLDAHRKDKR  
PALYSLSELENFKTADKLWNASQIQMRVEGKMHGFLRMYWAKKILEWTESPEQALEYSIYLNDKYNLDGRDPN  
GYVGCMWSICGIHDQGWAERAVFGKVRMNFEGCKRKFDIERYCLKYMAKKSEI

>Brachionus\_plic\_\_RNA16403.1

MPKGTGIHWFRHGLRLHDNPALLACQDEVERFIPIFIFD GKSAVFLPCTLLTGTETCGYVRLRFLQLQSLQDLES  
QFKEHGINFMCFHGEAHNVLENLIKWEVVRVISFEKDSESIWHKRDNLVKEMCARHNVQVIECVSNTLYDPEE  
VFSLSNSNQPPNTCEELRKSCYKIGEPEQPVPRPDLKFIASHLVSTNDLYDPVRHKIPDLDFFNKIPENKQKK  
CIFIGGETKALELCKIRIQYEKESFLAGKLNPNLSKPVLFTEKVSLSPYLRFGLSVRKLYADLKVVYVKNFN  
GLKNVYCPVEQLFWREYFYQLSYKNEKFAQVDGNPMCCKIPWDYHGKQDLFLKWESGQTGF PWIDACMRQLVQ  
EGWIIHHVCRNSVALFLTRGVLFMSWERMRTFLKYLIDADWSVCSGNWNWIATGDPEEVLNPTVTFCPVKYGK  
KIDPKGEYIKNYVPELREFPLEYLYEPWKAPLDMQEKAGCVIGKDYPEPIVDNEQAFRENI AKLQQFFHSERK  
EIFETFLNDKNALKPANSKEYRAYTFAKFLESEFEDF

>Brachionus\_plic\_\_RNA17082.1

MSDLQKQRLGILWFRNDLRLNDNLSLDKTIHLVKEKKLDLVLPIYCFDKLLFEGRSREAQLPKLGPFRRNFLI  
ESVENLKEKLQKKLNSNLICILYGEQDVEIKKLIKILTENPGIHIEYLIASREVPSDEVLENKVKKYLD SKR  
IKNFFLWDNLMIHPDDLFPFGHFSKTPDMFTQFRKSVELKESNYNVRKSVQIESNFSLP TFSQNDIVGQSIPEK  
AKITESPKSAILGMKGGEDQAE LRMQQYFFKTDGLFKYKTTRNGLVGTEYSSKLSMWLALGCISPRYLYWKVK  
EFETMKCSNESTKCLAFELLWRDFFKYHSLKFGKRIFYQNGCYTGAAGYQMNWKKDQRLFEKWINGETGYPFV  
DANMKELKETGWMSNRGRQNVASFLT KDLEIDWRFGAEYFETMLIDYDCTSNWGNWQYVAGVGTDP RADRYFN  
VIKQAYDYDQNGEFVKLWIPALQNVSD EFWHCPFRMSLVEQKSFNCILNKDYLPIVQMKHKWNPYSNKANKF  
AARQKRAK

>Brachionus\_plic\_\_RNA42711.1

MAPKREKIKNESDPSLGFGLKNEPSEPINATDMEKTAKCIYWFRKALRLHDNP SLMHAIQKSQYIYPIFILD P  
WVQKAKVGPNRWRFLQLQSLNDLNEQLIRKNSRLILIRGNPSAVFAEKIKEWDINLICFETDTEPYAKLRDQE  
ITKIATELVKVVETKYGHTLYNPDYVYKKNNEKIPLQYQS FVGALAKIGDPPKPIDEPSNVFNKLEIDYDLYK  
IPDLVSIGIDPSACGPLLFPGGETEALRRLEDKFKNESWICSFEKPNTSPNSLAPSTTVLSPYLKFGCLSARK  
FYWRLKQVYAKRKHSMPVVSLEGQLLFREFFYYVGAFTPNFNKIEGNPVCRQIKWDDKPEYVKAWKEARTGFP  
FIDAIMTQLRTEGWIIHHLARHAVACFLTRGDLYCSWEKGQEVFEEYLLDQDWSLNAANWMLSASAFFHQYFR  
VYSPIGFGKKTDENGDYIRKYIPVLKTFPAKYIFEPWTAPELVQKRHNCVIGKDYPRPIVDHNVISKINISRM  
KKAYEESKLVSTDDGDDKKS RPTSSKSTKNPPKSEKTS PDTRPPSKKSKN

>Bradysia\_cop\_XP\_037034936.1\_cry\_DASH-1

MGKFKNCLVWLNRNDRFHDNEALLWAHENAETITPLFCFDP RMFATTHRYQFPKTGNFRSKFLIECVDDLNR T  
IKAKGSLIILSKRPEEALAFIRGKCKFEAIAFQKEITKEEINVERECENFCLQNNITFQAIWGSTLYHKDDL  
PYDVKSTPDYTYTQFRKDVETRSKVRTEKRMPEKLLKPLPAELVGISEKIPLQLDLKLEPNLHANSAFFPNGGE  
TAALHRLKSYLWDTQAVEKYKITRNGLLGSEYSTKLS PWLAFGCISPRIFYEIRKYETERVKNDSTYWVIFE  
LLWRDYFRFVAVKYGNSLFYSSGGIKMKYKWTE DMEQFKKWADGKTGVPFVDANMRELLQTGWMSNRGRQNV A  
SFLT KD LKLDWRLGAEFYLLIDYDVCSNYGNWNYSAGIGNDPRADRKFNM IKQALDYDAEGEFIKLWIPEL  
VNIHKTGIHAPWTLRQELGGVKLGIDYPNPMVTAQ EWSRHLHKS KSSDWAAASKSKQKGHDYFKPNTSRK

>Bradysia\_cop\_XP\_037040970.1\_cry1-like

MTRSKFNSQLSGEKHTVHWFRKGLRLHDNP AII EGLTGSKTLRCIFIIDPW FAGISNAGINKWRFLQLQCLEDL  
DQNLRLKLSRLFVIRGQPADALPKLFKQWGTTCLTFEEDPEPFGKVRDDNIAALCKESNISVIKTVSHTLYDL  
ETIIE LNGGEAPLTYNQFQAIVASMEQPAAAVPTV TLEHLSTVFTPISEDHDEKYGVPTLYELGFETDNLQPP  
VWIGGETEALIRLERHLERKAWVASFGRPKMTPQSL LASQTGLSPYLRFGLCLSTRLFYHQLSDLYKKIKKACP  
PLSLHGQLLWREFFYCVATKNSNFDRMQNNPICVQIPWQKNPDALVKWAMGFTGFPWIDAIMTQLRNEGWIHH  
LARHAVACFLTRGDLWISWEEGMKVFD ELLLDADWSVNAGQWMWLSGSSFFQQIFHCYCPVRFGRKADPNGDY  
IRKYLPLCKTFFPLRYIHEPWSAPEDVQRVAKCIIGQDYPLPIVNHIRASRINMDRMRQAYQQLSKFRNANNTN  
NKR GKQLSVNLNTSNDNVP AVQQLDKGFLHPQRISIPSDSTYRQSYAHQLHQFKPELFAENVNYSKRENSHT  
TVLAYSYNRQTHNDDKFENFDFSASSLNANASNYVDDDQKDGGH SKHRKCELNENFDSFMEAE NENDPTRMT

>Bradysia\_cop\_XP\_037041975.1\_cry1-like

MDKQQKTIIHWFRKGLRIHDNPALAE AIDLIRKSPNKYVLRPIFVLDP EIPNWLKVGPNRWRFLQESLLQLDS  
NLRKIKSRLYVVRGDPKVIFPKLFNEWQVELLT FESDIEPYARQRDMLVEKQAKKFNVNITTVSHTIYNPEL  
IIQKSQGIAPKQYEGFLKIVSTMSIPEPLEAPAALPAKSKPSKDSNEHTDSKCYDCPALHELGVNEADLGDVL  
YPGGETEGLKRFQAILRKPDWICGF EKPKTSPNSLPSTTVLSPYLKFGCISRLMYS DLQKVLKNKKKHTTP  
PVSLIGQLLWREFFYTAAASDPNFNRMVGNSFCRQIPWKKNVQHLEAWTYGRTGYPFIDAIMRQLRQEGWIHH  
LARHAVACFLTRGDLWISWEDGQRVFEELL LDADWALNAGNWMWLSASAFYHLYYRVYSPVSFGKKT DKDGEY  
IRKYVPELANYPKSMIYEPWTATAAQQREFGCIIGKDY PQRIVIH DVVLKKNMAKMADAYQKHRDGGGGGKFD  
VDNTQAKPEPQSPKTEPVSPSTSSGCS SSKILKMEQNSTIVKYFKKDPKSP

>Bradysia\_cop\_XP\_037043249.1\_deoxyribod

MRHLNEIRLIVVYAKHLKINLSMSSSSISPPPKRKNKSNNPST SSEVSTEVD SKGRPKSVNFKEQFKNARIQT  
AESVLDFKFIKSRVRILSANGNPESARGIVYWM SRDARVQDNWAF LFAQKLALKNEVPLHICFLVPKFLDA  
TIRHYKFLNLGLKEVEAECSALNISFHLLIGTAATTIPKFVKDNGIGAVVCDFSPLRPVQWVDDVLHKL PKT  
VPLVQVDAHNIVPVWETS DKQEYAARTIRGKINKKLDNFLTD FPPVIRHPYESDAKKIKIDWQTA FDSLEVDM  
TVDEV DWAKPGYSHGVEEME QFCNHR LKIFNDKRNDEPLANALSNLSPWFHFGQISVQRTILT VKKYKKLYPSS  
VDAYVEEAVVRRELSDNFCFFNK NYDSINGLSGWAKQTLIDHKKDKREWIYTRKQLDSSQTHDDLWNSAQIQL

RLEGKMHGFLRMYWAKKILEWTNSPEEAEIAIYLNDRYSLDGRDPSGYVGCWWSIGGVHDMGWKERAIFGKI  
 RYMNYKGCEKKFDVKAFVSRYGKGVHSGKGGK  
 >Branchiostoma\_belc\_\_XP\_019616322.1  
 MSLRLFISSVPINSLFLARTKVFHRASILNFLCAKKSPPFVLGKQYIAVSSRNMSGDKRKSSSGSGESPSKKAK  
 VENGASSSSQDGAGEDFLQQIADRRTGVCESVAGFKFNKKRCRQMSDGGDLKQNCGGILYWMSRDQRVQDNW  
 ALLFAQRLALKHKVPLYVCFCLVPKFLDATIRHYGFMLKGLEEVEKELTELDSFHLTGHAVDVLPEFVSEK  
 NIGGVVTDFSPLRTPMKWVHDLAGKLPDVPFVQVDAHNIVPCWEASPKQEYGARTIRNKIHNQLSSYLTEFP  
 PVCKHPHPTKDKPEPTDWAAARASLKVDMTVAEVTWATPGTTGGLRQLESFCKQRLKNFGTDRNNPNKRALS  
 LSPWIHFGQISVQRCILTVKKYRSKYKESVDAYIEEAIIRRELSDNFCFYNHDKYDSIKGAAAWAQKTLKDHA  
 GDKREYLYSREQLEQAKTHDDLWNAAQIQLNKEGKMHGFLRMYWAKKILEWTESQVALKEAIYLNKYSLDG  
 RDPNGYVGCWWSICGIHDQGWAERPVGKIRFMNYNGCKRKFDVAQFVTKYKAKGFLKK  
 >Branchiostoma\_belc\_\_XP\_019620932.1  
 MEALSVFTSKSSSTHFLISTEMTNKEVGMEVQEQHNTIHWFRKGLRFHDNPSLLHALRTSRHVYPVYILDLDLDF  
 MKDFKIRCGANQWRFMIOCLEDLDERLRKYGLRLFVVRGSAETFFREQFRRWNITQLTHDVETEYHRRFRDAA  
 VRKIATDAGVEVVNYVAHTLYNIDKIIIEYNGGTAPLTYRKQKVLDRDFGAPPQASEMATAEHFANCSLPPEDL  
 HDEKYDMVTLEELGVKCNPFKVFVGGETEGLRRVEKHLQNGWITQFEKPKTAPTSLPSTTGLSPYFSVGCL  
 SVRYFYHRLNNIYAKAKDHSLLPPVSLQGQLLWREFFYVAAAQTPNFVVMAGNPICLQIPWYENKEHLRRWRHA  
 ETGFPWIDAISQLQOEGWIHHLARHAVACFLTRGDLWISWEEGQKVFEELLLDADYSVNAGNWMWLSGSAFY  
 HQYTRIFCPVRFGKRTDPNGTFIRAYLPVLKDFPAQYIYEPWKAPLKVQEAAGCIVGRDYPFPMVDHEIVSQQ  
 NLELMREIREQQRQITLLTLEGREDESSTSTDGGDSRKRRKRPVHPANDDEIIKVVVTAL  
 >Branchiostoma\_bel\_XP\_019620887.1\_MCRY  
 MKSTIHWFRKGLRLHDNPSLRDALQMLQPGDVWRVCVYVLDVPWFAGSSNVGVNRWRFLQCLELDASLRKLNS  
 RLYVIRGQPTDVFPRLFKEWKVSCLSFEEDSEPFGRERDMAMKLAKEAGVKVILRTSHTLYKLQDIIDVNGG  
 QPPLTYKRQFQAILSKMDPPDQPVDTITASTVDKLTTPIQDDHDEKYGVPSLEELGFDTNLPVWVWPGGETEA  
 LTRLERHLERKAWVASFERPKMTASSLLASPTGLSPYLRFGCLSPRLFYKKLTLEYKKVRSNHPPLSLYGLQ  
 LWREFFYTAATNNPNFDMVNNTICVQIPWDKNPEALAKWAEGQTGFPPWIDAISQLQOEGWIHHLARHAVAC  
 FLTRGDLWISWEEGMKVFEELLLDADWSVNAGSWMWLSGSSFFQFFHVYCPVNFGRRTDPNGDFIRKYLPLK  
 RGFPKAYIYDPWNAPEVQKAAKCIIGKDYPLPMVNHAEISRINVERMKQVYQQLSRYRGAGTQCLLATIPYP  
 DGGNGNPTGHKKHALVQGMERPHGERREREHQQPAHMPFLKRRRWDIRFQAPEAIDQSEGDMSNVD  
 >Branchiostoma\_floridae\_XP\_035688923.1\_cryptochro  
 MANKVQHSTIHWFRKGLRFHDNPSLLHALRTSRHVYPVYVVDQNMWKEHDIRYGANWWRFVIQCLEELDTRLR  
 KYGLRLFVVRGSAEDFFKEHFRKWKVTQLTHDVDETFYRIRDVAVRKIASDMGVEVVTHTVAHTLYDIDRTVE  
 RNGGTPPLTYRKFLKVYNEMGKPPKEKETATTEHFANCTLPPEALQDKKFDVMTLEELGMRCDFPAKFVGGET  
 EALRRLEKSLEDKDWLKFKEPKTSPNSLLPSTTVLSPIYITVGCL SARLFYHQLDKIYSKAKNHSQPPVSLHG  
 QLIWREFFYTAATAHTPNFNQMEGNRVCLQIPWNKNDHLTRWRNAQTGFPPWIDAAMTQLRKEGWIHHLARHAV  
 ACFLTRGDLWISWEEGMKVFEELLLDADWSLNAGNWMWLSASAFFHQYFRVYSPIVFGKKTDPKGTIFIRHYLP  
 VLKNFPKEYIYEPWKAPRNVQEKAGCIVGKDYPRPIVDHKEASQRNLDIMRDVRKDQKETASVTLGYGK  
 >Branchiostoma\_flo\_XP\_035662699.1\_cry-1-like  
 MKSTIHWFRKGLRLHDNPSLRDALQMLQPGDVWRVCVYVLDVPWFAGSSNVGVNRWRFLQCLELDASLRKLNS  
 RLYVIRGQPTDVFPRLFKEWKVSCLSFEEDSEPFGRERDMAMKLAKEAGVKVILRTSHTLYKLQDIIDVNGG  
 QPPLTYKRQFQAILSKMDPPDQPVDSITASTVDNLTTPIRDDHDEKFGVPSLEELGFDTNLPVWVWPGGETEA  
 LTRLERHLERKAWVASFERPKMTASSLLASPTGLSPYLRFGCLSPRLFYKKLTLEYKKVRSNHPPLSLYGLQ  
 LWREFFYTAATNNPNFDMVNNTICVQIPWDKNPEALAKWAEGQTGFPPWIDAAMAQLQOEGWIHHLARHAVAC  
 FLTRGDLWISWEEGMKVFEELLLDADWSVNAGSWMWLSGSSFFQFFHVYCPVNFGRRTDPNGDFIRKYLPLK  
 RGFPKAYIYDPWNSPESVQKAAKCIIGKDYPLPMVNHAEISRINVERMKQVYQQLSRYRGAGLLATIPYPDGG  
 NGNPTGHKKHAIVQGMERQHAERREHGQPAHAAEARDQSEGDMSNVD  
 >Branchiostoma\_flo\_XP\_035692392.1\_photolyase  
 MEAGEDFLDQIAERRQNVCEVAGFKFNKKRCRQMSDVGDLKQNCGGIMYWMSRDQRVQDNWALLFAQRLAM  
 KHKVPLYVCFCLVPKFLDANIRHYGFMLKGLEEVEKELTDLDVSFHLTGYAVDVLPGFVDEKNIGGVVTDVS  
 PLRTPKLVHDLAGKLPDVPFVQVDAHNIVPCWEASPKQEYGARTIRGKIHNQLSSYLTEFPVPSQHPHPPK  
 DKPEPTDWAAARASLKVDMTVAEVTWATPGTTGGLRMLSEFCKQRLKNFGTDRNNPNKRALSLSLSPWIHFGQI  
 SVQRCILTVKKYRSKYKESVDAYIEEAIIRRELSDNFCFYNHDKYDSIKGASAWAQKTLKDHAQKREYLYSR  
 EQLEQAKTHDDLWNAAQIQLNKEGKMHGFLRMYWAKKILEWTESQVALKEALYLNKYSLDGRDPNGYVGCW  
 WSICGIHDQGWAERPVGKIRFMNYNGCKRKFDVAQFVTKYKAKGYLKK  
 >Bremia\_lac\_TDH69075.1\_CCR75\_0051  
 MASVRRALEKLKLPAGLHCEIRIQWLCEGAALQTKDRYLLYWMQTSVVRTKHNYALEYAVAAANELKMPLYVVYL  
 FPDERSVVPALNNQVKDDEWKAQAIQDANAHAFATERHAFFALEGLTDAHERLASRGVSLDVFHHQHHAACPT  
 RSELLEICARKATLVVTDRLPYLRPWSALDTLVSSVETTQDDGKTGSSYGIVQIEGDVVVPVEEVTDKEEYAA  
 RTIRSKITKHLDRYIVPLEVMTLDKTCQTNGQSIVSLLNPHEIQALDVTSTKAIEATLKLDDVDRSVKSVKW  
 HFKGGEKAASACVKKFLTPANLEKYATERNEPSLDAGSDLSHYLRYGHISVVRIVLAAHKLKGVARAQEGVKS

FLEELIVRRELSVNLVVFNQENYDSMRCLPSYAQKTLQEHAEKRNVIYSRDTLESFQTDDRYWNAAQRELVI  
SGKMHGYMRMYWGKKLLEWTRTPEEGFNAALTLNNKYAIDAPDANSYAGIAWTFGKHDQGWRRERAI FGKVRYM  
NEAGLKRFKMDAYVLKVGRLA AKAKRGAASDNTDNVDGHVESGGKRKADSEQTGA VAKSKKL

>Bremia\_lac\_TDH74364.1\_CCR75\_0094

MKVLVWFRDVRMHDNLALHAALQQIKNTSGKGDVELIPLYILHRPQLLRGCVHRFQFVLESVADLAKSFQDR  
GSPLLIAGDGLKVLECLLPAGWITHLFFDGACEPFGIERDNQVLDVAKTLNIQTHVTNGYNLYDLKKVITSH  
SNQAPKTYRSFLKAIGNQSKPNEPISAPEKL PFSLRNPTELYQNVLN YWNDSNQSNQSQKNKNKKLI EDIGGP  
KHDFTL PDLQHFQFTPPEKHSFIYGGE EIALEMLKKFCADETR VAKFEKPKTSPAATPPSPSTTVLSPYLHLG  
CLSPRTFYHTVQAILQRHSNVTKPPTSLLGQLLWRDFYHCHGQANPYFDKMEE SPTCLQINWRYHLIPEKKED  
WSADDKLARSQFEAWRDGKTGFPWIDAIMIQLKEEGWMHHLARHAVACFLTRGDLYISWIRGLEVFQERLIDH  
DWSVNAGNWLWLSSSYFFTAYFRVYSPISFGK KYDPEGLLIK KYIPALKKFP AKYIYEPWKAPESI QRSAGCR  
IGTDYPAPIVEHPKAKKKCLEGLKMSYANHEYGTFTAKDTRRSTKRQREDS ENGE

>Bucco\_cape\_NXH11539.1

CIYILDPWF AASSAVGINRWRFL LQSLEDLDNSLRK LNSRLFVVRGQPTDVFPRLFK EWGVTRLTFFEYDSEPF  
GKERDAAIVKLAK EAGVEVVIENSHTLYDLDRI IELNGHKPPLTYKRFQAIISRME LPKKPVSTVTSQQMEVC  
KVDIQENHDDVYGVPSLEELGFPTDGLAPAVWQGGETEALARLDKHLERKAWVANYERPRMNANSLLASPTGL  
SPYLRFGCLSCRLFYYRLWEL YKKVKRNSTPPLSLY GQLLWREFFYTAATNNPKFDRMEGNPICIQIPWDRNP  
EALAKWAE GKTGFPWIDAIMTQLRQEGWIHHLARHAVACFLTRGDLWISWESGVRVFD ELLLDADFSVNAGSW  
MWLSCSAFFQ QFFHCYCPVGFGRRTPSGDFVKRYLPKLKGFP SRYIYEPWNAPESVQKAAKCIIGVDYPKPM  
VNHAETSRLNIERMKQIYQQLSRYRGLCLLASVPSCVEDLSGPVTD SASGQGCSTSTAIRLAPAEQASPKRKH  
EGVEELCTEELYKRAKVTGLPAPEIPGKS

>Bucco\_cape\_NXH15799.1

GEKSHQGLTQLFLLFSSCAPQVDYDVCSNYGNWLYSAGIGSDPRDNRKFSMIKQGLDYDGN GDYVRLWIPELQ  
GIKGADIHTPWALSSATLSQAGVTLGETYPQPVVTAPEWSKHINQRPQGRSSHPRGRRGPAHTPVQHKDRGID  
FYFSHKKDV

>Bucco\_cape\_NXH16479.1

LXWFRKGLRLHDNPALRECIQGADTVRCVYILDPWFAGSSNVGINRWRFL LQCLELDANLRK LNSRLFVIRG  
QPADVFPR LFKEWNI AKLSIEYDSEPF GKERDAAIKKLASEAGVEVIVRISHTLYDLDKIIELNGGQ PPLTYK  
RFQTLISRMEPLEMPVETITPEVMEKCTTPVSDDHDEKYGVPSLEELGFDTDGLPSAVWPGGETEALTRLERH  
LERKAWVANFERPRMNANSLLASPTGLSPYLRFGCLSCRLFYFKLTDLYKKVKKNSSPPLSLY GQLLWREFFY  
TAATNNPRFDKMEGNPICVQIPWDKNPEALAKWAEGR TGFPWIDAIMTQLRQEGWIHHLARHAVACFLTRGDL  
WISWEEGMKVFEELLLDADWSVNAGSWMWLSCSSFFQ QFFHCYCPVGFGRRTPDNGDYIRRYLPVLRGFP AKY  
IYDPWNAPESVQKAAKCMIGVNYPKPMVNHAESRLNIERMKQIYQQLSRYRGLGLLATVP SNPNNGNGNGGLM  
SYSPGESISGCGNTGGGAQLGTGDGHTVVQPCALGDSHTGTSGIQQGYCQASSILHYAHGDNQQSHLLQAGR  
TSLGPGISAGKRPNPEEETQTVGPKVQRQSTN

>Bucco\_cape\_NXH19275.1

MPHHTLHLFRKGLRLHDNP TLLAALQSSEVLYPVYILDRKFMTSVIHIGALRWHFLLQSLEDLQKNLCQLGSC  
LLVLQGEYESVLRKHIQEWNITQVTLDEEMEPFYKEMEANIRHLGEELGF EVLSRGSH TLYDTKRILELSGGT  
PPLTYKRFLHILSLLDPEQPVRSLTAEDFQRCQPPQQLAEQYRVPLPVDLRIAPESLSPWRGGETEGLQRL  
EQHLTDQGWVASFTKPKTTPNSL LPSTGLSPYFSMGCLSARSFFYRLSSIYAQAKHHS LPPVSLQGQLLWRE  
FFYTVASATPNFTKMAGNPICLQISWYEDA EKLHRWKMAQTGFPWIDAIMTQLRQEGWIHHLARHAVACFLTR  
GDLWISWEEGMKVFEELLLDADYSINAGNWMWLSASAFFHQYRRIFC PVRFGKRTDPEGHYIRKYL PVLKNFA  
SKYIYEPWTASVEEQKQAGCII GQDYPPFMVNHKEASEHNLQLMKQVREEQYRTAQLTRDDTDDPMEGKV KRE  
HSEENTSKGKVARTTE

>Bucco\_cape\_NXH23233.1

DNWAFLYAQR LALKQELPLHVCFC LVPKFLDATIRHYDFMLKGLQEVAKECAKLNIAFHLL LGYAKDVLPTFV  
VEHGVGGLVTD FCPRLRPRQWVEDVREQLPEDVPFAQVDAHNIVPCWVTSHKQ EYSAWTIRGKI HALLPEFLT  
EFPPVICHFPYPPSCPAETIAWEACYSSLQVDCTVKEVEWATPGTAAGLKV LQSFITERLKSFC SHRNNPNKAA  
LSNLSPWFHFGQVSTQRAILEVQKHRGKYKDSVDAFVEEAVVRRELAENFCY YNDNYSVQ GAYDWAQTTLTL  
HAEDKRPFLYELPELEQGITHDPLWNAAQRQMVWEGKMHGFLRMYWAKKILEWTCSPTEALRIAIYLNDRYEL  
DGRDPNGYVGCLWSICGVHDHGWAERAVFGKIRYMN YAGCKRKFDVQG FERRY

>Buceros\_rhin\_silvestris\_KF083926.1

GSEVVLFLYLAFFSRI IELNGHKPPLTYKRFQAIISRME LPKKPVSTVISQQMETCKVDIQENHDDVYGVPSL  
EELGFPTDGLAPAVWQGGETEALARLDKHLERKAWVANYERPRMNANSLLASPTGLSPYLRFGCLSCRLFYYR  
LWEL YKKVKRNSTPPLSLY GQLLWREFFYTAATNNPKFDRMEGNPICIQIPWDRNPEALAKWAE GKTGFPWID  
AIMTQLRQEGWIHHLARHAVACFLTRGDLWISWESGVRVFD ELLLDADFSINAGSWMWLSCSAFFQ QFFHCYC  
PVGFGRRTPSGDYVKRYLPKLKGFP SRYIYEPWNAPESVQKAAKCIIGVDYPKPMVNHAETSRLNIERMKQI  
YQQLSRYRGLCLLASVPSCVEDLSGPVADSASGQGCSTSTAVRLSQADQASPKRKHEGAEELCAEELYKRAKV  
TGLPAPEISGKS

>Buceros\_rhin\_silvestris\_KF090010.1

RFLQCLELDANLRKLNSRLFVIRGQPADVPRLFKEWNIAKLSIEYDSEFPFGKERDAAIKKLASEAGVEVI  
VRISHTLYDLDKIIELNGGQPPLTYKRFQTLISRMEPLEMPVETITPEVMEKCTTPVSDDHDEKYGVPSLEEL  
GFDTDGLPSAVWPGGETEALTRLERHLERKAWVANFERPRMNANSLLASPTGLSPYLRFGCLSCRLFYFKLTD  
LYKKVKKNSSPPLSLYGQLLWREFFYTAATNNPRFDMEGNPICVQIPWDKNPEALAKWAEGRGTGFPWIDAIM  
TQLRQEGWIHHLARHAVACFLTTRGDLWISWEEGMKVFEELLLDADWSVNAGSWMWLSCSSFFQQFFHCYCPVG  
FGRRTDPNGDYIRRYLPVLRGFPKYYIDPWNAPESVQKAAKCIIGVNYPKPMVNHAEASRLNIERMKQIYQQ  
LSRYRGLGLLASVPSNPNGNGGMLMGYSPGESISGCGSTGGAQLGTSDGHTVVQPCALGDSHTGASGIQQQG  
YCQASSILHYAHGDNQQSHLLQAGRTALGTGISAGKRPNPEEETQSVGPKVQRQSTN

>Buceros\_rhin\_silvestris\_KFO93683.1

DNWAFLYAQRLALKQELPLHVCFLVPKFLDATIRHYSFMLRGLQEVAKECAELNIPFHLLGYAKDVLPTFV  
VEHGVGGLVTDFCPLRLPRQWVEDVRDQLPEDVPFAQVDAHNIVPCWVASPKQEYSAWTFRCKINPQLPEFLT  
EFFPVVRHPYPSPCPAEPIAWEACYSSLQVDRTVKEVEWATPGTAAGLAVLQSFIAERLKSFGSHRNNPNKAA  
LSNLSPWFFHFGQVSTQRAILEVQKHRSKYKESVEVFVEEAVVRRELAENFCYYNENYDSVQGAYSWAQTTLKL  
HAKDKRPFLYNLQELEQGTTHDPLWNAQLQMVREGKMHGFLRMYWAKKILEWTHSPEEALQFAIYLNDRYEL  
DGRDPNGYVGKRLWSICGIHDHGWTERAVFGKIRYMNYAGCKRKFDVQGQFERRYAP

>Bucorvus\_abys\_NWR58043.1

MGVNAVHWFRKGLRLHDNPALRECIQGADTVRCVYILDPWFAGSSNVGINRWRFLQCLELDANLRKLNSRL  
FVIRGQPADVPRLFKEWNIAKLSIEYDSEFPFGKERDAAIKKLASEAGVEVIVRISHTLYDLDKIIELNGGQP  
PLTYKRFQTLISRMEPLEMPVETITPEVMEKCTTPVSDDHDEKYGVPSLEELGFDTDGLPSAVWPGGETEALT  
RLERHLERKAWVANFERPRMNANSLLASPTGLSPYLRFGCLSCRLFYFKLTDLYKKVKKNSSPPLSLYGQLLW  
REFFYTAATNNPRFDMEGNPICVQIPWDKNPEALAKWAEGRGTGFPWIDAIMTQLRQEGWIHHLARHAVACFL  
TRGDLWISWEEGMKVFEELLLDADWSVNAGSWMWLSCSSFFQQFFHCYCPVGFGFRRTDPNGDYIRRYLPVLRG  
FPKYYIDPWNAPESVQKAAKCIIGVNYPKPMVNHAEASRLNIERMKQIYQQLSRYRGLGLLATVPSNPNGNG  
NGGLMGYSPGESISGCGSTGGHLFPASPGAQLGTGDGHTVVQPCALGDSHTGASGIQQQGYCQASSILHYAHG  
DNQQSHLLQAGRTALGTGISAGKRPNPEEETQSVGPKVQRQSTN

>Bucorvus\_abys\_NWR62381.1

DNWAFLYAQRLALKQELPLHVCFLVPKFLDATIRHYGFMLRGLREVAEECAELNIRFHLLGYAKDVLPTFV  
VEHGVGGLVTDFCPLRLPRQWVEDIRERLPEDVPFAQVDAHNIVPCWVASPKQEYSAWTFRCKIHAQLPEFLT  
EFFPVVRHPYTPSPCPAEPIAWEACYSSLQVDHTVKEVEWATPGTAAGLAVLQSFIAERLKSFSSSHNNPNKAA  
LSNLSPWFFHFGQVSTQRAILEVQKHRGKYKESVEVFVEEAVVRRELAENFCYYNENYDSVQGHWAQTTLKL  
HAKDKRPFLYKLQELEQGTTHDPLWNAQLQMVREGKMHGFLRMYWAKKILEWTHSPEEALQFAIYLNDRYEL  
DGRDPNGYLMCLLWSICGVHDHGWTERAIFGKIRYMNYAGCKRKFDVQGQFEHRYAPRM

>Bufo\_bufo\_XP\_040265064.1

MEAASTAASLHWFRKGLRIHDNPALVAALRGARCVRCVYILDPWFAASSSGGVNRWRFLQSLLEDLDSSLR  
KLGSRLYVVRGQPADVPRLFKEWGNRLTFEYDSEFPFSKERDAAIMKLAKAEAGVEVIVENSHTLYDLDKII  
LNGNSPPLTYKRFQAIISRMELPRRPVLTITRQQMAPCRGEIKNTHDETYGVPSLEELGFRENQGAAVWPGG  
ETEALARLDRHLERKAWVANYERPRMNANSLLASPTGLSPYLRFGCLSCRLFYRLQELYQKVKNSSPPLSL  
YGQLLWREFFYTAATNNPKFDQMEGNPICVQIPWDRNPEALAKWTEGKTGFPWIDAIMTQLRLEGWIHHLARH  
AVACFLTTRGDLWNSWECGVKFVDELLEDADFSVNAGSWMWLSCSAFFQQFFHCYCPVGFGFRRTDPSGDYVRRY  
LPVLKGFPSRYIYEPWNAPESVQKEAKCVIGVDYPKPIVNHAEASRLNIERMKQTYQQLSRYRGLCILASVPS  
CAEDLSGPISDPVAHQISIEAAPKLSLCPADSPKRRYKKSVEGACKKARMQSVAEVEMTAKDF

>Bufo\_bufo\_XP\_040284355.1

MSQKARAPKRKSEGSGNEKSDTSQKDDSKTKSITATKSQGKRNPQEHKNKSKVISDASSSETSEVDVKKKKLQ  
EKKVDVDGGLLEAVKKSRLSVATSVSDFKFSKKRVRLVSAEENLKDDALGIVYWMSRDQRVEDNWAFLYAQRL  
ALKQKLPLHVFCFLVPKFLDATIRHYGFMLKGLQEVAEDCKGLNIPFHLLIGYAKDVLPDFVKEHGIGGVVTD  
FSPLRVPLQWVSDICERLPEDVPLVQVDAHNIVPCWVASNKQEYGARTIRRKIHDQLSQFLTDFFPPVITHPYK  
SNLKAEPVDWDKCYASLEVDRTVKEVEWAKPGSKAGMNTLHSFISERLKFFNSDRNNPNRRALSSLSPWFFHG  
QLSVQRAILEVQKYRSKYKESVDSFVEEAVVRRELADNYCYNKNYDKVEGAYDWAKNTLKDHAHAKDKRTHLYT  
LEQLESQKTHDPLWNAQMVHEGKMHGFLRMYWAKKILEWTSSPEEGLRFAIYLNDRFQLDGRDPNGYVGCW  
SICGIHDQGWAEARAVFGKIRYMNYQGCKRKFDVAEFERRYHPPKFTA

>Bufo\_bufo\_XP\_040287471.1

MPQRSIHWRKGLRLHDNPALLAAIKGCEELHPIFILDWPFPRNMKVSGNRWRFLIEALRDLDENLKKINSRL  
FVVRGKPTFVFPQLFKKKVTRLTFEVDTEPYSRQDAEVEKMASEHNQVIQKVSNTLYDVDRVIAENNGKP  
PLTYVRLQTVLASIGPPKRPCPAPTKEKMDCCTPWKPSYEEIYGVPTEELGQDPSKLGPHLYPGGESEALR  
RLDLNMKRTAWVCNFKKPETEPNSTTPSTTVLSPYMKFGCLSTRIFYWRLTEIYQKKHSSPPVSLHGQLLWR  
EFFYTAGAGIPNFNKMEGNSVCVQVDWDENKEYLKAWSEARTGYPFIDAIMTQLRTEGWIHHLARHAVACFLT  
RGDLWISWEEGQVQFEDLLLDADWSLNAGNWQWLSASAFFHQFFRVYSPVAFGKKTDKNGDYIKKYLPILKKF  
PPEYVYEPWKSPRSVOERAGCIIGKDYPKPIVEHEIVSKRNIQRMKAAYARRSGTGGEKVPKSQGVKRKVPV  
SQFFKKK

>Bufo\_bufo\_XP\_040288557.1

MKMAALSRTIICLLRNDLRYHDNEVLLWAHRNADHIVPLYCFDPRHYLGTHYYNFPKTGPHRLKFLLETVQDL  
RNTLQKKGSNLLRRGQPEDVIEDLIKQLGGVSAVVLQEEATKEELDVEKSVKQVCTQHGVKFHTIWGSTLYH  
RDDLPFRHISSLPDVTYQFRKVVEAQCKVRPTLQMPKELKSLPAGLEEGSVPTAEDFEQQDPLTDPRTAFPCN  
GGESQSLQRLQYYFWDTNLVASYKDRNGLVGM DYSTKFAPWLALGCISPRYIFEQIRKYERDRTANQSTYWV  
IFELLWRDYFRFVALKYGRKIFFLKGLQDKKVPWKKDLKQFDWKEGRTGVFPVDANMRELAMTGFM SNRGRQ  
NVASFLTKDLGLDWRMGAEWFEYLLVDYDVC SNYGNWLYSAGIGNDPREN RKFNMIKQGLDYDGKGDYIRLWV  
PELQEI KGGDVHTPWALSNAALAHANVTLGETYPPFIVMAPEWSRHVNQKPD SGATASGRRPGPSHMPKQHKN  
RGIDFYFSRNKNV

>Bufo\_bufo\_\_XP\_040295401.1

MGVNAVHWFRKGLRLHDNPALKECIRGADTIRC VYIILDPWFAGSSNVGINRWRFL LQCLEDLDANLRKLNSRL  
FVIRGQPADVFPRLFKWKISKLSIEYDSEPF GKERDAAIKKLASEAGVEVIVRISHTLYDLDKI IELNGGQP  
PLTYKRFQTLISKMEPLEIPVETITAEVMDK CSTPVSDDHDEKYGVPSLEELGFDTEGLPSAVWPGGETEALT  
RLERHLERKAWVANFERPRMNANSLLASTTGLSPYLRFGCLSCRLFYFKLTDLYKKVKKNSSPPLSLY GQLLW  
REFFYTAATNNPRFDKMDGNPICVQIPWDRNPEALAKWAEGR TGFPWIDAIMTQLRQEGWIHHLARHAVACFL  
TRGDLWISWEEGMKVFEELLLDADWSVNAGSMMWLS CSSSFFQQFFHCYCPVGFGRRTDPNGDYIRRYLPILKG  
FPPKYIYDPWNAPEAVQKVAKCIIGVNYPKPMVNHA EASRLNIERMKQIYQQLSRYRGLGLLASVPSNPNGNG  
NGGLMSYSPGDTMPCCSNNGGPQMGASEGNSSSNSNNQGESHS GTGGMQGYWQGSSILHYNYGDSQQSYLIQ  
DVGNNRRVT

>Bulinus\_trun\_\_KAH9490127.1

MCYKSVCVFVFSKIWTLLKKIFEVIKALKRNINVTNLNLRNLLIIKRSIKMSKHKVIHWFRKGLRLHDNPALR  
EALKQSSEVYPVFVLDPWVFNSSKIGINRWRFL LQSLENLDNNLKS LNLRLYVVRGK PETELPRLCKEWEITR  
LTFEVDTEPYAVQRDKKVEEIVQPMGVEIVKCVSHTLYDVHEIIKANGDKAPLTYQGFQSM LSKLGPPAQALP  
APSKQDVSDIKTLISSTHDVKYGVPTLSDLGKSESSCGPLLYPGGETEALDRMERHIKKINWICTFEKPNTSP  
NSIIPSTTVLSPYLKFGCL SARLLYHKLAEVYK GKKHSQPPVSLHGQMLWREFFYTVA AVTPNFDHMKDNPVC  
KQIPWTSNQEHL SAWTHAKTGYPFIDAIMTQLRQEGWIHHLARHAVACFLTRGDLWISWEEGQKVFEELLLDA  
DWSLNAGNMMWLSASAFFHQYFRVYSPIAFGKKTDPNGDYIKKYIPVLKKFPAKYIYEPWTAPSSVQQAAGCI  
IGKDYPKPIVEHDKVRNENIKKMADAYAQDKLNKEGSQSSPKRPHSSDSKNTSAKKSRTK

>Bulinus\_trun\_\_KAH9490293.1

MKRSFSGKESKKTTKRKQDEGQTSEKSTASITCAEEKDTVPEVVD FLEKITKRRERLHENVAKFNFNKKRVR  
VLSKTEEFPEKSHGVLYWMSRDQRTQDNWAFLYA QRLAMKLEVPLYVCFLIPKFLEATIRQFGFMMKGLALV  
EKECKDLGIPFHLLLGEASQCIPPF LQEK NIGGVVTFDSPLRVPMKWVDDLKKALPTDIPFCQVDAHNIVPCW  
VASPKLEYGARTIRSKIHNQLGQFLTEFPPLVNHPHSPEKMPAATDWKKAESYLEVDKKVTEVEWAKPGTEAG  
LRMLESFCEKRLKYFSTDRNDPNKEALS NLSPWFHFGQISVQRCILTVRLYRSKSSDSVNAFIEEAVVRRELA  
DNFCFYNPDYDSVKG TNDWAKKSLDLHRKDKRPYMYTREQLERSQTHDDLWNAAQ TQLVIEGKMHGFLRM YWA  
KKILEWTESPEKALADAIYLN DKYNLDGRDPNGYVGCMWSICGIHDQGWAERAVFGKVRYMNYEGCKRKFDVP  
AFVRNGLQLSTVVYNDLQLSKVVYNDLQLSTVVYNDLQLSTVVYNDLQLSTVVYNDLQ

>Bulinus\_trun\_\_KAH9507287.1

MQIASENPSIAICLFRNDLRVHDNEALYTANQKGKFL LPLYCFDPRHYAGTYHFGFPKTGCYRLQFLLESVTD  
LRLKLQSLGSNLIVRLGKPEDVIAELVKSLNIPNNVAVVIQKEVTEEEVKVEQDIRSKCRVPLLT VWGHTLYH  
IEDLPFEPKHLDPVYTQFRKKVEDNIPVRKLINLPVQLNPLPMGIDPGLIPTFANFGFTAPDRDPRTAF PFFG  
GETSALERLHHYMWVTDNICTYKETRNGMIGPDFSTKFS PWLAHGCISPRKIYWEIKKYERERTSNQSTYWVI  
FELLWRDYFRYVALKYGNKIFFSGGIKGESVPWKTNHSHFKAWQEGRTGVPPYVDANMRELAATGFM SNRGRQN  
VASFLTKDLQLDWRLGAEWFE SLLIDHDVCSNYGNWLYSAGIGNDPREN RKFN VVKQGLDYDGDGNYVR LWVR  
ELAGIKTGKIHCIWTLSNSQLQSGGVILGQTYPSPIVIAPEWSRHVNR PSSSSGASSGKGKGKSSSSSHKSQVQ  
QGPYPGQKRGLDFYFSNTNPR

>Bulinus\_trun\_\_KAH9508662.1

MKENHREYSMAQSQTS LPTKKHSLFWFRKGLRLHDNPALLAIDGASTYRCIYIILDPWFAGASQVVINKWRFL  
LESLEDLDSSLRKLNRLFVVVRGQPADVLPRLFQEWGITHLA FEEDPEPYGKERDAAISALAREQSIQVITKS  
SHTVYDPKIVIAANGNSPPLTYKRFQSILSKLD PPLQPCESLSSNMVAEVSTPVSDDHDRFNVPSLEELGFD  
VDSL GPAQFRGGESEALARYHLERKAWVASFERPKMSPQS LYPSTGLSPYLRFGCLSPRLFYWKLT ELYK  
KVKKGAEPPLALHGQLLWREFFYT VATNNPNFDRMAGNSICVQIPWDHNPEALAKWAEGMTGYPWIDA IMAQL  
RKEGWIHHLARHAVACFLTRGDLWISWEEGMKV FDEMLLDADWSVNAGMWWLSCSAFFQQFFHCYCPVGF GK  
RADPSGDFVRHYLPVLKGFP TQYIYEPWTAPESVQKAAKCIIGKDYPLPMVQHAEACRVNLERM RQVYKRLVL  
KSTASKRMFLDLPKIPKVS LFLSKAKMFLSSSDEDV SQKQRRRKIDE

>Bulinus\_trun\_\_KAH9520043.1

MSHNEKKGHVTVHWFRHGLRLHDNPALLDGL EDCREFYPIFIFDGDVAGTSTA AAFPRMQFLFESLQDLDDNLK  
SHGTRLYVFKGDPVDVFKRLIEEWGVTRITFEQDPEPVWQARDSRVKKLCADQDIECIERVSH TLWDPQLIIK  
ENGGTPPLTYAMFCQVADIVGLPPKPKGNPDFSGISLPVSEHHDEKYQLPTLAEMGV EAESEQQASPYCRYMG  
GETKAFKLLTIRLEKERKAFTMNQSLPNQLY PELSGMPLSLSPHLRFGSMSIRKFYWSLRQVYSEVHPNTQIP  
AAITGQLIWREYFYCMSVNNPNYNRMIGNPICLKIDWYDNDSHL KAWKMGKTGYPWIDACMRQLLQEGWIHQV

CRHATACFLTRGDLWIDWVKGLEVFDRYLLDADWSVCAGNWMWVSSSAFEKVLQCPKCICPIRYGRRIDPKGE  
YVRRYVPELKNMPLRYLFEPWKAPQKVQEEAQCIIGEDYPMPIVNHGIASKECQTRMEIIKSKSKDIPHIRPA  
NEDEVYSSMWVSKELEKMDLCRHNNDRI LFD M

>Cafeteria\_roe\_KAA0161729.1\_FNF31\_0367

MSAAAAA AVPGRRAKAAIHWFRKGLRLHDNPALLRACEAAAVYPVFVIDPWVSEERVGVNMRMFLLETLED  
LDAALRARSSKLSVLRGRPEEVLPRAAAHWGADLLTFEADFEPYALQRDEAVRSLLAERGVRVESFVSHSLYD  
PRGVAAAGPGGKPLSYGPFVKLLRGIGPPRPARDPPAAMPSEGWKAPAALTFTDNATTASGTGDGASSLP  
ASGEPASAAHGDR LAEARI PSLADLGYAPPEHAPLFPGGEQEGLRRMAAKLSRGDWVRAFAKPKTSPTAVGEP  
DTTGLSPYLKFGCVSSRRFWHELA AVNAGGPHGSPPTSLEGQLLWREFYICHGFSFPNYDRMAGNPVCRQIAW  
QDDPELLRRWEEGTTGFPWIDACMRQLRAQGWLHHLGRHAVACFLTRGDLYQSWERGARVFDRLLVDS DWALN  
NGNWMWLSASAYFFQFFRVYSPVAFPKHTDPDGDYVRRWVPELANFPKAYIYEPWKASKQNQRKWGCEIGSDY  
PEPIVDHVAVSKLNMARHKAAYEAHKAPGPPRDVPVGDSPGAFQVGSAPRAPKRARGDGDEGDAAAPGSGSEE  
RDGASAAKRKAPAS P

>Cafeteria\_roe\_KAA0175826.1\_FNF27\_0254

MMARRAGRVAAPVSSGLAGAAAASEGRRAVATGATSASGGTAVVWFKATDLRLHDHGPLAKAHAAHSHVVHVM  
CIDPRWFGASPTGFAKTGFHRRARFLSESVADLARSLAARGSSLVVRASRPEVALPAVAAAACGASAVYAHSEVC  
SEELAADRAVRAALHGLPSPVRLSQCWGNTLHDVADLPFDASSDTPQVFSQFRRLVEAKCKPRPPLPPPPALR  
PAPPGFAAGTSPHGLAMLPLDGGGPGSQPPHSHAAVRPLPASAVDAVLAGRVPMAWELGCALPPGMDTSALRP  
VAPPAGVGLPPGVALASGPGAASGAAGGAVPPAAPAAPAPALSARQVECGGLRDPRAIQFLFGGETAALA  
RLRLYLWDEDRLREYKQTRNGMAGQGFSKLSPLAVGALS PRQVAAEVARYERERVANESTYWLLFELLWRD  
YFRFACIGWGSDFRLAGPKRALDPGRGWSRDPVWGPWTRAQTGYPLVDACMREL TQSGFMSNRGRQNVASF  
LARDLEADWRVGAEWFE SLLADHDPCSNYGNWTVVAGVGADPREDRYFSIPKQARNYDGHGTFMRLWLPEGLD  
VVRRAKLA FQENAHLTDEVAIKRAVAKGRYVWREIHATHALHKYRSIKKRY Y

>Cafeteria\_roe\_KAA0176536.1\_FNF27\_0181

MATAGRAPKRDRSEGEAAAAA PPPKKGRAPAAAVSPRRQRALNSVPVRPGPILYWMSRDQRAEDNWALLAAQD  
LAQARGEPLVVA FSLVRGFLGATQRQFDWMLRGLEETEADLRKNIPFVLVRGPCERTIQSLAERGKFGAIVC  
DFAPVRIGRRWRD TVASNAGVAVIEVDARNIVPAWLASDKLEYAARTIRPRIHRQLGEFLTEFP SLAKQEDFF  
PGGWDALQRLASEASADAASAEGTTVQGGVGASAAAASAGAGAEALPCGAGAGIPWPEVRRSLD VDATVPPVA  
WLAPGPAAAMAQVGRFLARIRAYGKDRNDPSKGATSLSPYLHFGHLSSQRAALLARAQRSKAPESVDGFIEE  
MVVRRELAENYVFYNQDGYDRIDGMY PQFGNDSWAQSRSLREHASDKRSVLYTREELES GKT HDPLWNAQAEM  
VHLGHMHGFNRMYWAKKILEWTPSPEEALATC IALNDKYQLDGRDPNGWVGCAWAVAGVHDNGWKERP VF GKI  
RYMNL TSTIRKFSIDSYVARVAQRVEAETGLRSDVT KGMAAKQAAPGKKGQLWGLAGLR RVKAE

>Calidris\_pugn\_\_XP\_014800382.1

MSGAARTAI CLLRCDLRAHDNQVLHWAQGNAD FVVPLYCFDPRHYLGTHCYGF PKTGPHRLRFLLESVKDLRE  
TLKKKGSTLVVRKGKPEDVVRDLITQLGSVS AVAFHEEATQEELDVEKGLCQVCSQHGVKIQTFWASTLYHRD  
DLPFRSISRLPDVYTHFRKAVESEAKVRPTLRMADQLKPLPPGVEEGCIPTMEDLGQKDPVTDPRTA FP C SGG  
ETQALMRLQYYFWDTNLVASYKETRNLVGM DYSTKFAPWLALGCISPRYIYEQIQKY EKERTANQSTY WVLF  
ELLWRDYFRFVALKYGKRIFSLRGLQSKEVPWKDLQLFDCWKEGKTGVPFVDANMRELAATGFVSNRGRQNV  
ASFLT KDLGLDWRMGAEWFEYLLVDYDVC SNYGNWLYSAGLGNDPRDNRKFNM IKQGLDYDGN GDYVRLWVPE  
LQGIKGAEIHTPWALSAAALSQAGVTLGDTYPQPVVTAPEWSRHINQRPQGQRPHPRGKRGP AHTPRQHKDRG  
IDFYFSRKKDVQ

>Calidris\_pugn\_\_XP\_014801325.1

MRRGQGRKAEATEVPGVSRRRKEEEEAMQEARRRAAPSVREFKYNNKKRVRLVSQGS DLKDDARCILYWMSRD  
QRVQDNWAFLYAQRLALKQELPLHVCFLVPKFLDATIRHYGFMLKGLREVAEECAELNIPFHLLLG YAKDVL  
PAFVVERGVGGLVTDFCPLRLPRQWVEDVKERLPEDVPFAQVDAHNIVPCWVASPKQEYSARTIRGKIHAQLP  
EFLTEFPPIRHPYSPSSPTEPIAWEACYSSLQVDRTVKEVEWATPGTAAGLAVLQSFIAERLKSFGSHRNDP  
NKAALSNLSPWFHFGQVSTQRAILEVQKHRAKYKESVDAFVEEAVVRRELAENFCYNNENYDSVQ GAYDWAQT  
TLKLHAKDKRPFLYK LQELEQGTTHDPLWNAAQ LQMVREGKMHGFLRMYWAKKILEWTRSPEEALQFAIYLND  
RYELDGRDPNGYVGCLWSICGIHDQGWAEARAI FGKIRYMNYAGCKRKF DV AQFERRYAPRTLSQ

>Calidris\_pugn\_\_XP\_014801760.1

MSHRTIHLFRKGLRLHDNP TLVAALESSEVLYPLYILDRKFMTSVMHIGALRWHFLLQSLEDLQKNLSQLGSC  
LLVAQGEYEAVLRDHVQKNITQVTLDAEME PFYKEMEAKIRRLGEELGFEVLSLVGHSLYD TKRILDLNGGT  
PPLTYKRFLHILSLLDGPEVPVRNLTAEDFQRCQPPDPGLAEGYGVPLPVDLKLPPESPSPWRGGETEGLRRL  
EQHLTDQGWVASFTKPRTPVNSLLPSTTGLSPYFSMGCLSVRTFFYRLSNIYAQAKHSLPPVSLQ GQLLWRE  
FFYTASATPNFTKMAGNPICLQIPWYEDAERLHKWKTAQTGFPWIDAIMTQLRQEGWIHHLARHAVACFLTR  
GDLWISWEEGMKVFEELLLDADYSINAGNWMWLSASAFFHQYTRIFCPVRFGKRTDPEGHYIRKYL PVLKNFP  
SKYIYEPWTASEEEQQRAGCLIGRDYPFPMVNHKEASAHNLQ LMKQVREEQPRTAQLTRDETDDPMEMKV KRD  
HSEENIPKGKVARMA DDTEVPLEPKKGRGEAGGN

>Calidris\_pugn\_\_XP\_014805817.1

MAAVAPLAPLAPGPAPSLCRSVHWFRRGLRLHDNPALQEALRDAASLRCIYILDPWFFAASSAVGINRWRFLLQ  
SLEDLDNSLRKLNLSRLFVVRGQPTDVFPRLFKEWGVTRLTFEYDSEPFGERDAAIVKLAKEAGVEVVIENSH  
TLYDLDRIIELNGHKPPLTYKRFQAIISRMELEPKKPVSTIMSQQMETCKVDIQENHDDVYGVPSLEELGFPTD  
GLAPAVWQGGETEALARLDKHLERKAWVANYERPRMNANSLLASPTGLSPYLRFGCLSCRLFYYRLWELYKKV  
KRNSTPPLSLYGQLLWREFFFYTAATNNPKFDRMEGNPICIQIPWDRNPEALAKWAEKGTGFPWIDAIMTQLRQ  
EGWIHHLARHAVACFLTRGDLWISWESGVRVFEDELLLDADFSVNAGSWMWLSCSAFFQQFFHCYCPVGFGRRT  
DPSGDYVKRYLPKLKGFPSTRYIYEPWNAPESVQKAAKCIIGVDYPKPMVNHAETSRLNIERMKQIYQQLSRYR  
GLCLLASVPSCVEDLSGPVPDSASGQGCSTSTAMRLSQADQASPKRKHEGAEEPCAEELYKRAKVTGLPAPEI  
PGKSL

>Calidris\_pugn\_\_XP\_014816511.1

MQHSSIHWFRRGLRLHDNPALLAAVTDCCRHLPLFILDPSGSRAGANAWRFLLDALQDLDRSLQEMGSRLFVV  
RGCPEEVFPRLFHAWGTTRLTFEVDTEPLAHRDDAAVAELAAQHGVETIQKVSHTLYDTERILALNDGKAPMT  
YKRLQSLLASLGPPEKPPALPTREHLQGCRVPCQVSHNADYGVPTLEELGQDPTKVGPLHYPGGETAALTRLD  
THMERTAWVCSFKKPEPETENSLSPSTTVLSPYLRFGCLSVRTFWWRLEIYQGREHSQPPVSLHGQLLWREFF  
YTAGATIPNFDQMLGNPVCLQVDWDDNPQHLQAWREGRTGYPFIDAIMTQLRSEGWIHHLARHAVACFLTRGD  
LWVSWEEGLKVFEELLLDADWSLNAGNWLWLSGSAFFHRYFHVYSPVTFGKKTDDQDYGAYIRKYLPIKDFPTE  
YIYEPWKAPRAVQERAGCLVGTNYPQPIVEHQAVRERNMGRMKAARARKNGSGPKKHQAPPTVLLSPRLPSSP  
PANKREPPASPSVAESQRKKPKAEQR

>Calidris\_pugn\_\_XP\_014819465.1

MEPLEMPVETITPEVMEKCTTPVSDDHDEKYGVPSLEELGFDTDGLPSAVWPGGETEALTRLERHLERKAWVA  
NFERPRMNANSLLASPTGLSPYLRFGCLSCRLFYFKLTDLYKKVKNSSPPLSLYGQLLWREFFFYTAATNNPR  
FDKMEGNPICVQIPWDKNPEALAKWAEGRGTGFPWIDAIMTQLRQEGWIHHLARHAVACFLTRGDLWISWEEGM  
KVFEELLLDADWSVNAGSWMWLSCSSFFQQFFHCYCPVGFGRRTDPNGDYIRRYLPVLRGFPKYIYDPWNAP  
ESVQKAAKCIIGVNYPKPMVNHAESRLNIERMKQIYQQLSRYRGLGLLATVPSNPNGNGGLMGYSPGESI  
SGCGSTGGAPLGTGDGHAVVQPCALGDSHTGASGIQQQGYCQASSILHYAHGDNQQSHLLQAGRTALGTGISA  
GKRPNPEEETQSVGPKVQRQSTN

>Caligus\_rog\_QQP54369.1\_cry1

MKNAEPPLALFNQLLWREFFFYAAAFQNPNFDRMKGNPICLQIPWDKDSVALRKWSLGKTGFPWIDAIMTQLRE  
EGWVHFICRHAVVCFLTRGDLWISWEEGMKVRNSYSRKDWPSGYPLELKILFIFNIQAF

>Callithrix\_jacc\_\_XP\_002752992.2

MGVNAVHWFRRGLRLHDNPALKECIQGADTIRCXYILDPWFAGSSNVGINRWRFLLQCLEDLDANLRKLNLSRL  
FVIRGQPADVFPRLFKEWNITKLSIEYDSEPFGERDAAIKKLATEAGVEVIVRISHTLYDLDKIIELNGGQP  
PLTYKRFQTLISKMEPLEIPVETITSEVIEKCTTPLSDDHDEKYGVPSLEELGFDTDGLSSAVWPGGETEAL  
RLERHLERKAWVANFERPRMNANSLLASPTGLSPYLRFGCLSCRLFYFKLTDLYKKVKNSSPPLSLYGQLLW  
REFFFYTAATNNPRFDDKMEGNPICVQIPWDKNPEALAKWAEGRGTGFPWIDAIMTQLRQEGWIHHLARHAVACFL  
TRGDLWISWEEGMKVFEELLLDADWSINAGSWMWLSCSSFFQQFFHCYCPVGFGRRTDPNGDYIRRYLPVLRG  
FPAKYIYDPWNAPEGIQKVAKCLIGVNYPKPMVNHAESRLNIERMKQIYQQLSRYRGLGLLASVPSNPNGNG  
GFMGYSAESIPGCTSSGSCSQSGILHCAHGDSQQTHLLKQGRSSMSTGISGGKRPSQEEDTQSIGPKVQRQS  
TN

>Callithrix\_jacc\_\_XP\_002755255.1

MAATVATAAAAAPAPAGTDGASSVHWFRRGLRLHDNPALLAAVARGARCVRCVYILDPWFFAASSSVGINRWRF  
LLQSLLEDLDTSLRKLNSRLFVVRGQPADVFPRLFKEWGVTRLTFEYDSEPFGERDAAIMKMAKEAGVEVVT  
NSHTLYDLDRIIELNGQKPPPLTYKRFQAIISRMELEPKKPVGSVTSQQMESCRAEIQENHDETYGVPSLEELGF  
PTEGLGPAVWQGGETEALARLDKHLERKAWVANYERPRMNANSLLASPTGLSPYLRFGCLSCRLFYYRLWDL  
KKVKRNSTPPLSLFGQLLWREFFFYTAATNNPRFDRMEGNPICIQIPWDRNPEALAKWAEKGTGFPWIDAIMTQ  
LRQEGWIHHLARHAVACFLTRGDLWVSWESGVRVFEDELLLDADFSVNAGSWMWLSCSAFFQQFFHCYCPVGF  
RRTDPSGDYIRRYLPKLKGFPSTRYIYEPWNAPESIQKAAKCIIGVDYPRPIVNHAETSRLNIERMKQIYQQLS  
RYRGLCLLASVPSCVEDLSHPVAEPSSSQAGSMSSAGPRPLPSGPASPKRKLEAAEEPPGEELSKRARVAELP  
TPELPSKDV

>Callorhinchus\_milii\_XP\_007885950.1\_cryptochro

MVNSVHWFRRGLRLHDNPALQAAVSGADTVRSVYILDPWFAGSSNVRINKRWRFLLQCLEDLDISLRKLKSRL  
FVVRGQPTDVFPRLFKEWNVTRLTFEYDSEPFGERDVAIVNLARKAGVETIVHTSHTLYDVNRIIEANGNKP  
PLTYKRFQAIISRLELPKSPVGSVTLEQMENCTTDEANHSEKYGIPSLDELGFNTSELGPATWNGGEIEALA  
RLNKHLERKAWVANYERPKLNADSLVSSPTGLSPYLRFGCLSCRLFYYRLQELYKTVKGAIPPLSLYGQLLW  
REFFFYTTATNNPKFDRMEGNPICVQIPWDKNPHALTQWADGLTGFPWIDAIMQLRKEGWIHHLARHAVSCFL  
TRGDLWISWEEGMKVFEELLLDADFSINAGSWMWLSCSAFFQQFFHCYCPVGFGRRTDPSGDYIRRYLPPLKE  
YPTKYIYEPWNAPLAVQKAAKCIIGIDYPKPIVNHAESRLNIERMKQIYQQLSHYKGLCLLPSVPSCCTDDSA  
SLAVRTHVDCTNTAALNSSYHVQSPVVMGKREKPECFTEDGCIIAKIPRLQSPEGNGRIV

>Callorhinchus\_mil\_XP\_007893621.1\_cry-1

MGGNSIHWFRKGLRLHDNPALMKTVLTSDRVRCVYILDPWFAGSSNVGINRWRFLQCLEDLNLRKLNSRL  
FVIRGQPADVFPRLFKEWDISLLSFEYDSEFPFGKERDAAIKKLASEAEVKVIVDVSHTLYNLDKIIELNGGQP  
PLTYKRFQTLISRMEPLDLPVETITREVMGRCTTPILDDHDEKYGVPSLEELGFDTEGLSSAVWPGGESEALT  
RLERHLERKAWVANFERPRMNSNLLASPTGLSPYLRFGCLSCRLFYFKLTDLYKKVKKNSSPPLSLYGQLLW  
REFFYYAAATNNPRFDKMEGNPICVQIPWDRNAEALAKWAEKGTGFPPWIDAIMTQLRQEGWIHHLARHAVACFL  
TRGDLWISWEEGMKVFEELLLDADWSVNAGSMMWLSCSSFFQQFFHCYCPVGFGRRTDPNGDYIRRYLPVLRG  
FPAKYIYDPWNAPEVQKAAKCILGVHYPKPMVNHAEEASCLNIERMKQIYQQLSCYRGLGLLDSVPSNPNGNG  
GIMGYSAGENTHGCNNLTGDLPTNGNHSPLYTQSEFQLRNNQQQSYITGVNGQGSNLLCFSQRDSQLSHTTL  
LQQGRNTPMSGKRHSPEEEMQGFQPKVQRQNSN

>Calonectris\_bore\_\_NXV89335.1

IRRCRSPDPALAEYRVPLPVLDKIPPELSLSPWRGGETEGLQRLQHLTDQGWVASFTKPRTI PN SLLPSTTG  
LSPYFSLGCLSVRTFFYRLSNIYAQAKHHSPPVSLQGQLLWREFFYTVASATPNFTKMAGNPICLQIRWYED  
AERLHKWKTAQTGFPPWIDAIMTQLHQEGWIHHLARHAVACFLTRGDLWISWEEGMKVFEELLLDADYSINAGN  
WMWLSASAFFHRYTRIFCPVRFGKRTDPEGQYIRKYLPI LKNFP SKYIYEPWTASEEEQKQAGCIIGRDYFPF  
MVNHKEASDHNQLQMKQVREEQHGTALTRDDTDDPMEMKVVRDH

>Calonectris\_bore\_\_NXV89640.1

RFLQEWGVTRLTFEYDSEFPFGKERDAAIVKLAKEAGVEVVIENSHTLYDLDRIIELNGHKPPLTYKRFQAIIS  
RMELPKKPVSTVMSQQMETCKVDIQENHDDVYGVPSLEELGFPDGLAPAVWQGGETEALARLDKHLERKAWV  
ANYERPRMNANSLLASPTGLSPYLRFGCLSCRLFYRLWELYYKKVKRNSTPPLSLYGQLLWREFFYTAATNNP  
KFDRMEGNPICIQIPWDRNPEALAKWAEKGTGFPPWIDAIMTQLRQEGWIHHLARHAVACFLTRGDLWISWESG  
VRVFDLELLDADFSVNAGSMMWLSCSAFFQQFFHCYCPVGFGRRTDPSGDYVKRYLPKLGFPSPRYIYEPWNA  
PESVQKAAKCIIGVDYPKPMVNHAETSRLNIERMKQIYQQLSRYRGLCLLASVPSCVEDLSGPVADSASGQGC  
STSTAMRLSQADQASPKRKHEGAEELCTEELYKRAKVTCCLPAEIPGKSL

>Calonectris\_bore\_\_NXV90725.1

KVDYDVC SNYGNWLYSAGIGNDPRDNRKFNMIKQGLDYDGNNGDYVRLWVPELQAIKGADIHTPWALNSAALSQ  
AGVTLGETYPPQPVVTAPEWSRHINQR

>Calonectris\_bore\_\_NXV93746.1

MQHSSIHWFRKGLRLHDNPALLAAADCHRLHPLFILDPSSTRTGANARRFLLDALRDLGSLREMGSRFLFVV  
RGCPEEVFPRLFHAWGTTRLTFEVDTEPPARRRDTAVAEELAAHGHVEVIREVSHTLYDTERVLALNDGKVPLT  
YKRLQSLLASLGPPEKPAPALTREHLQGCRTPCQVSHDADYGVPTLEELGEDPAELGPHLYPGGETAALARLD  
TLMERTTWVCGFKKPEPETEPTSLSPSTTVLSPYLKFGCLSVRTFWWRLEDEYVQGREHSQPPVSLHGLLWREFF  
YTAGASIPNFDPMVGNPVCLQVDWDDNPQHLRAWREGRTGYPFIDAIMTQLRAEGWIHHLARHAVACFLTRGD  
LWVSWEEGLKVFEELLLDADWSLNAGNWLWLSGSAFFHRYFHVYSPITFGKKTDRDGAYIRKYLPLVKDFPAA  
YIYEPWKAPRAVQERAGCLVGTHYPRPIVEHGAASKRNLERMKAAR

>Calonectris\_bore\_\_NXV94998.1

MGVNAVHWFRLKGLRLHDNPALRECIQGADTVRCVYILDPWFAGSSNVGINRWRFLQCLEDLNLRKLNSRL  
FVIRGQPADVFPRLFKEWNIAKLSIEYDSEFPFGKERDAAIKKLASEAGVEVIVRISHTLYDLDKIIELNGGQP  
PLTYKRFQTLISRMEPLEMPVETITPEVMEKCTTPVSDHDEKYGVPSLEELGFDTDGLPSAVWPGGETEALT  
RLERHLERKAWVANFERPRMNANSLLASPTGLSPYLRFGCLSCRLFYFKLTDLYKKVKKNSSPPLSLYGQLLW  
REFFYTAATNNPRFDKMEGNPICVQIPWDRNPEALAKWAEGRGTGFPPWIDAIMTQLRQEGWIHHLARHAVACFL  
TRGDLWISWEEGMKVFEELLLDADWSVNAGSMMWLSCSSFFQQFFHCYCPVGFGRRTDPNGDYIRRYLPVLRG  
FPAKYIYDPWNAPEVQKAAKCIIGVNYPKPMVNHAEEASRLNIERMKQIYQQLSRYRGLGLLATVPSNPNGNG  
NGGLMGYSPGESISGCGSTGHLFPSSPGAQLGTGDGHTVVQPCALGDSHTGASGIQQQGYCQASSILHYAHGD  
NQQSHLLQAGRTAVGTGISAGKRPNPEEETQSVGPKVQRQSTN

>Calonectris\_bore\_\_NXV98579.1

DNWAFLYAQLALQELPLHVCFLVPKFLDATIRHYGFMLRGLQEVAKECTELNIPFHLLLGAKDVLPAFV  
VEHGVGGLVTDFCPLRLPRQWVEDVREQLPDDVPFAQVDAHNIVPCWVASPKQYEGARTIRGKIHAQLPEFLT  
EFPPVVRHPYLPSCPAEPIAWEACYSSLQVDRTVKEVDWATPGTAAGLAVLQSFIVERLKSFSSSHNDPNKAA  
LSNLSPPWFHFGQVSTQRAILEVQKHRGKYKESVDAFVEEAVVRRELAENFCYYNENYDSVQAYDWAQTTLKL  
HAKDKRPFLYDLQELEQGTTHDPLWNAQLQMVQEGKMHGFLRMYWAKKILEWTRSPEEALRFAYILNDRYEL  
DGRDPNGYVGKLQDRGLWSICGIHQGWAERAI FGKIRYMN YAGCKRKF DVGQFERRYAPRT

>Calypte\_anna\_\_KF095415.1

RFLQCLEDLNLRKLNSRLFVIRGQPADVFPRLFKEWNIAKLSIEYDSEFPFGKERDAAIKKLASEAGVEVI  
VRISHTLYDLDKIIELNGGQPPLTYKRFQTLISRMEPLEMPVETITPEVMEKCTTPVSDHDEKYGVPSLEEL  
GFDTDGLPSAVWPGGETEALTRLERHLERKAWVANFERPRMNANSLLASPTGLSPYLRFGCLSCRLFYFKLTD  
LYKKVKKNSSPPLSLYGQLLWREFFYTAATNNPRFDKMEGNPICVQIPWDKNPEALAKWAEGRGTGFPPWIDAIM  
TQLRQEGWIHHLARHAVACFLTRGDLWISWEEGMKVFEELLLDADWSVNAGSMMWLSCSSFFQQFFHCYCPVG  
FGRRTDPNGDYIRRYLPVLRGFPAKYIYDPWNAPEVQKAAKCIIGVNYPKPMVNHAEEASRLNIERMKQIYQQL  
LSRYRGLGLLATVPSNPNGNGGLMGYSPGESVSGCGSTGGAQLGTGDGHTVVQPCALGDSHTGASGIQQQG  
YCQASSILHYAHGDNQQSHLLQAGRTTLGTGISAGKRPNPEEETRGVGPVKVQRQSTS

>Calypte\_anna\_\_KFP00512.1

DNWAFLYAQRLALKQELPLHICFCLVPKFLDATIRHYGFMLRGLQEVAKECAELNIPFHLLLGyakdVLPafV  
VDHGVGGLVTDfCPLRLPRQWVEDVkerLPEDVPFAQVDAHNIVPCWVASPKQeYSARTIRGKIHAQLPEFLT  
EFPPiIPHPYSPSCPAEPIAWEACYSSLQVDRtVKEVEWATPGTAAGMAVLKSFITERLKSfSSSHRNDPNKAA  
LSNLSPWFHFgQVSTQRAILEVQKHRRKYKESVDafVEEAVVRRELAENfCYYNENYDSVKGAYDWAQTTLNL  
HAKDKRPFLYKLQELEQGTTHDPLWNAAQLMVQEGKMHGFLRMYWAKKILEWTRSPeeALQFAIYLNDRYEL  
DGRDPNGYVGCLWSICGIHDQGWAEraIFGKIRYMNYAGCKRKFDVGEfERRYTP

>Calypte\_anna\_\_XP\_008500450.1

MTAICLLRCDLRAHDNQVLHWAQSNAEFVVPlyCFDPRHYLGTHCYGFpKTGPHRLRfLLESVKDLRETLKRK  
GSTlVVrkGKPEDVVDLITQLGSVSAVafHEEATQeELDVEKGVsQVCKQHGVrTRTFWAATLYHRDDLPFR  
PIVRLPDVFTQFRKVVESQVKVRPTLQMAHHLKPLPPGLEEGCIPTMEDLGQKDPVTDPRtaFPCSGGETQAL  
MRLQYYfWdTNLVASYKETRNGLVGMDYSTKFAPWLALGCISPRYIYEQIQKYEKERTANESTYwVLFELLWR  
DYFRfVALKYGNRIfSLRGLQNKYIPWKKDLQLfDCWKEGNTGVPFVDANMRELSASGFMSNRGRQNVASFLT  
KDLGLDWRMGAEWfEYLLVDYDVCSNYGNWLYSAGVGNDPREHRKFNMVKQGLDYDGKGDYVRLWVPeLQSIK  
GADIHTPWALNTAALSQAGVTLGETYPQPVVTAPEWSRHINQKPQGRSPHPRGKRGPahTPRQHRDRGIDfYF  
SHKKDL

>Calypte\_anna\_\_XP\_030307868.1

MAAMAAPAAVPCSPVPVPCsAPVPAfCRSVHwFRRLRLHDNPALQeALRDAASLRciYILDPWFAASSAVGIN  
RWRfLLQsLEDLDNSLRKMNSRLfVVRGQPTDVfPRLfKEWGVTrLTfEYDSEPFgKERDAAIKLAKeAGVE  
VVIENSHtLYDLDRiIELNGHKPPLTYKRfQAIISRMELPKKPVSTIMSQQMETCKVDIQENHDDVYGVPsLE  
ELGFPTeGLGPAVWHGGETeALARLDKHLERKAWVANYERPRMNANSLLASPTGLSPYLRFGCLsCRLfYYRL  
WELYKKVKRNSTPPLsLYGQLLWREffYTAATNNPKfDRMEGNPICiQIPWDRNPeALAKWAEGKTGFpWIDA  
IMTQLRQEGWiHHLARHAVACfLTrGDlWISWESGVRVfDELLLDADfSVNAGSWMWLSCSAffQqFFHCYCP  
VGfGRRTDPSGDYVKRYLPKLKGfPSRYIYEPWNAPEAVQKAACIIgVDYPKPMVNHAETSRLNIERMKQIY  
QQLSRYRGLCLLASVPSCVEDLGpVTDSTSGQGCSTSAAMRLLQADPASPKRKHEGAeELYSEELYKRAKMT  
GLPASEIPDKSS

>Camelus\_drom\_\_XP\_010994769.1

MGVNAVHwFRKGLRLHDNPALKECIQGAADTIRCVYILDPWFAGSSNVGINRWRfLLQcLEDLDANLRKLNSRL  
FVIRGQPADVfPRLfKEWNITKLSIEYDSEPFgKERDAAIKKLATEAGVEViVRTSHtLYDLdKIIElNGGQp  
PLTYKRfQTLISKMEPLiPVETITSEVIEKCTTPLSDDHDEKYGVPSLEELGFDTdGLPSAVWPgGETeALT  
RLERHLERKAWVANFERPRMNANSLLASPTGLSPYLRFGCLsCRLfYfKLTDLYKKVKKNSSPPLsLYGQLLW  
REffYTAATNNPRfDKMEGNPICVQIPWdKNPeALAKWAEGRTGFpWIDAIMTQLRQEGWiHHLARHAVACfL  
TRGDlWISWEEGMKVfEELLLDADWSINAGSWMWLSCSSffQqFFHCYCPVGfGRRTDPNGDYIRRYLPVLRG  
FPaKYIYDPWNAPEGIQKvAKCLIGVNPkPMVNHAeASRLNIERMKQIYQQLSRYRGLGLLASVPSPNPNgNG  
SLMGYSpgENIPGCSsSGSCTQGSgILHYAHGDSQQAHLLKQGKSSTGTGLSSGKRPSQeEDTQSIGSKVQRQ  
STN

>Camelus\_drom\_\_XP\_010998928.2

MAAAVATTAAAAPAPAAGeGATSVHwFRKGLRLHDNPALLAAVRGAHCVRcVYILDPWFAASSSVGINRWRf  
LLQsLEDLDtSLRKLNSRLfVVRGQPADVfPRLfKEWGVTrLTfEYDSEPFgKERDAAIMKMAKeAGVEVVTE  
NSHTLYDLDRiIELNGQKPPLTyKRfQTIISHMELPRKPVGSVTSQQMEScRAEIQENHDETFGVPSLEELGF  
PTEGLGPAVWQGETeALARLDKHLERKAWVANYERPRMNANSLLASPTGLSPYLRFGCLsCRLfYYRLWDLY  
KKVKRNSTPPLsLFGQLLWREffYTAATDNPRfDRMEGNPICiQIPWDRNPeALAKWAEGKTGFpWIDAIMTQ  
LRQEGWiHHLARHAVACfLTrGDlWVSWESGVRVfDELLLDADfSVNAGSWMWLSCSAffQqFFHCYCPVGfG  
RRTDPSGDYIRRYLPKLKGfPSRYIYEPWNAPEsIQKAACIIgVDYPRPMVNHAETSRLNIERMKQIYQQLS  
RYRGLCLLASVPSCVEDLSNPVAEPSSSQAGSMSSAGLRPLPGGPASPKRKLEAAEEPPGEELSKRARVAELP  
STELPGRDV

>Camponotus\_flo\_EFN74495.1\_cry-1

MTGSSNNEMVQGVASGVRGDGRKHTVHwFRKGLRLHDNPslKEGLAGASTfRCVfVLDPWFAGSTNVGINKWR  
fLLQcLEDLDcSLRKLNSRLfVIRGQPADALPKLfKEWGTtNLTfFEEDSEPFGRVRdHNISALCKELGISVVQ  
KVSHtLYKLDEIIERNNGKPPLTyHQfQNIvASMNpPEPPVSTVTAACIGNAYTPLKDDHDDHYGVPTLEELG  
FDTEGLLPVWVGGESeALARLERHLERKAWVASfGRPKMTPQsLLPSQTGLSPYLRFGCLsTrLfYYQLTDL  
YKKVQDDCNPIVIKkAVPPLSLHGQLLWREffYCAATKNSNFDRMQGNPICVQIPWdKNVeALAKWANGQTGF  
PWIDAIMTQLREEGWiHHLARHAVACfLTrGDlWISWEEGMKVfDELLLDADWSVnAGMWMWLSCSSffQqFF  
HCYCPVRfGRKADPNgDYIRRYLPVLKNfPTRYIHEPWNAPlSIQHAACKVIGKEYSLPMVNHNKTSRINIER  
MKQVYQQLNKYRGE

>Candidatus\_Lok\_TFG08969.1\_photolyase

MKKTRVRNLSKPKKSgGAIVYWMSRDQRVNDNWALIfAQDMAIREKLPMmViFCLIPsFLGATLRQYDFMLSG  
LEQIHEKLTELNIpfKIMSGFPQqEIPKFIDENDVGCLITDFsPLRIKRNWIKSIKEKLTIHFYEVDTHNIIP  
CWTASPKREYAAYTFRPKVRKLLPQYLDEfPPMKKMPDKSLENDLGINWEGLKKHLKIDPSVLPINWIQSGEK  
AAAEKLKNFMKDKLADYDALRNDPNKNGQSELSPYLHFgQISAQRIVLELNKIKKNGKSKNAfLEELVVRREL

SDNFCFYTPPEYDKFDSFPPWAKQTLKKHEKDKREYLYSLDELEGAKTHDDAWNAAQIEMVTKGKMHGYMRMYW  
GKKILEWTKTPEKALEIALYLNCKYEIDGRDPNGYVGVAVSIGGVHDRAWKEREIFGKVRYSYDGLKRKFNL  
KQYIERIYINKS

>Candidatus\_Pos\_DAC31551.1\_TPA:\_photo

MQVAIVWFRNSLRIHDNPVLSWAYESENIEAILPIYIFDEEINQRGTQTMGEHRLRFQFDCVEDLHENLKS  
DLDLHIFSGNCVAVLESINEQLQPYEVILLTEYSTSPQDREQNEVIENNIITHTQWSAKAIPSSQTILDVEA  
ITSSPKYKPPKSMKDMVRLFKLEFGDFENIVFQTNELNPSLSSRKKGLSVNSQYQTSLDKIRPLLTTPGYFRG  
GENEAIARLENKVISQHDYVNSFNKPKSISTNVKGNPFEPSTTGLSPYISTGCLSIIRLWNSCSEIQQSSEHT  
VPPVSLHGQILFREMFIYLLSRSTANWDQDIGNSQCKEIEWGELNQVQLDAWESGQTGFPLIDAMMRQLNATGW  
MHHLGRHAVSCFLTRGQLWQNWTHGRDVFERKLVDSDWAVNNGNWLWLAGVAPFSMPYYRIYNPCPDAKSSLN  
VETKDAEFIRHWPELAEFFSKYIFEPNLAPLHIQESAGCLIGKDYPSPIIDRKESRKKNLQSFKLSLENLR

>Candidula\_unif\_CAG5117961.1

MAKRASSSAGSKTRNSTKAAPAENDPKKEVKKAVKRKQEPDEVVPVKSCKPSKEIPESEDSAKSVKNGEDKKL  
STTGDFIEKIIQKRAAVCESVAKFKFNKKRVRVITDMEEFSLSSNGVLYWMSRDQRVQDNWAFLYAQRLALKL  
EAPLHVCFCLVPTFLEATIRQFGFMMKGLAEVEKECRDLNIPFHLLRVASTSVPNFVKENNIGGIVTDFSP  
RTPLKWLDDLKALPKDVPLCQVDAHNLPVCWVASPKLEYAARTIRTKIHNLQLEGFLTDFFPLVQHPHPPDKM  
PSVTDWKAADFLKVDRTVQEVSWAKPGSIHGLRMLDFCENRLKNFATHRNDPNKKALSNSLPWLHFGQISA  
QRCILTVKQYQGRHKDSVNAFIEETVIRRELADNFCFYNNENYDSIKGTYDWAQKTLEAHRGDKRQYLYSRKDL  
ELAKTHDNLWNAAQIQMVTEGKMHGFLRMYWAKKILEWTKSPEEALVEAIYLNDRYNLDGRDPNGFVGCWMSV  
CGVHDQGWMPVFGKIRYMNYEGCKRKFVDVIAFCTRYRKLKA

>Candidula\_unif\_CAG5120301.1

MEELEFHDSVDSKRHVTVHWFHGLRLHDNPALLAGLRGCREFYAVFIFDGAVAGISTAAPRPMQFLMETLQD  
LDENLKTGSRHLVFRGNPVEVFGKLIIEGWVTRVSLEQDPEPIWQKRSDVKALCSKREVIEWIERVSHTLWD  
PQLIIQENGSGPPLTYAMFCQVMEIVGQPPVPVRNPDFSQVSLPVSNDHDQKYGLPPLDALGVKAESDHQASP  
YCRYLGGETKALKLLSSRLEKERAASFRLSLPNQLYPLDTGMPSLSPLHFRGSLIRKLYWSLRLVYTQVH  
PNAPVPASITSQLIWREYFYCMSVNNPAYNRMKENPICLNIDWYDDENKFQQWKTGQTGYPWIDACMRQLMQE  
GWIHQVCRHATACFLTRGDLWIDWQKGLEVFDRYLLDADWSVCAGNMMWVSSAFENVLQCARCICPVRYGRR  
MDPSGEYVRRYPPELKGMPQLQYLFEPWKAPITVQOEAGCIGQDYPSPMVDHKIASQECKLRMDMVRKRSE  
AHIGPASEAEALSFLWVTKHSNAEIMEVCNHNLS

>Candidula\_unif\_CAG5124456.1

MKDNTNEHFMSQTQLHSHGTRHTLFWFRKGLRLHDNPALIAAIENATTYRCVYILDPWFAGASQVGINKWRF  
LLECLEDLSSRLKLNRLFVVRGQPADVLPRLFQEWGINTLAFEEDPEPYGKERDAAISAMVREFNIQVIAK  
SSHTLYDPKIVIAANGNSPPLTYKRFQSILATLEPPRQPCETLTGQMLVNVSTPVADDHDDRFSVPSPDELGF  
DSDLGPAQFRGGESEALARLYRHLERKAWVASFERPKMSPQSLYPSGTGLSPYLRFGCLSPRTFYWKLAELY  
KKVKKGVDPPLALHGQLLWREFFYTATNNPNFDRMVGNSICVQIPWEHNPEALAKWAEGLTGFPWIDAIMVQ  
LRKEGWIHHLARHAVACFLTRGDLWISWEEGMKVFEMLLDADWSVNAGMWWLSCSAFFQQFFHCYCPVGF  
KRADPSGDFVRHYLPVLKGIPTQYIYEPWTAPESVQKAAKCIIGKDYPLPMVQHAEACRVNLERMRQVYKRLV  
LKSTANKRIFDLPLKIPKVSMLSKAKMFLSSSSDEEVHQKQRRRKPVDEEFTHQ

>Capitella\_tel\_EL79477.1\_CAPTEDRAFT

MPEPPLKKQKSSSSSSSKHVSSDVFLERIKGLREDAASSISDFSFNKNRVRTLTPCKKPSPD SKGVLYWMSR  
DQRVQDNWALLYSQKLALDLEVPLYINFCLVPKFLEATIRQFGFMLKGLQEEVEKECKSLRISFHLHLGHATDH  
LPQFVEDHNIGAIVTDFCPLRVPTKWVTDLVKSLPDEIPLFQVDAHNIVPCWEASPKQEYGARTIRNKIHNQL  
SKYFTEFPPIVQHAFEAAPCPAVDWIEAEKSLEVDRSVKEVDWATPGTTAGLKNLESFIQKRLGNFDADRNN  
PNKNALSNMSPWFHFGHVAPQRAMLMVNEMKTKYSKSVAAAYIEEGVIRRELCDNYCFYQPNYDNIDGAYEWAR  
LTLKAHRKDKREYVYSKEQLEKKGKTHDDLWNAAQQTQLLIEGKMHGFLRMYWAKKILEWTETPERGLEEA  
IYLN  
DKYSLDGRDPNGYVGCWMSICGIHDQGWAERAVFGKIRFMNYNGCKRKFVDVAAFVSRYRTQAACKL

>Capitella\_tel\_EL04573.1\_CAPTEDRAFT

MCEENAQIPGEPSSKKKKKNVLYWFRCLRLHDNAALIVEVLKEADTFRCIFILDPWFAGASQVGINKWRFLLQS  
LEDLDSRLRLKLNRLFVIRGQPTDIFPKLFQKWDISALAFEEDPEPFGKERDSAVCTKSQDAGIEVIKTSHT  
LFNLQKILDGNSGVPLTYKRFQRI LARMDDPPRPVEAVTSVTIGSVVTPINSDHDDQYGVPTLEDLGFDTDN  
LEAAVWPKGGETEALSRLDRHLERKAWVASFEKPKMTPQSLMASPTGLSPYLRFGCLSTRLFYWRLTDLYRKVK  
KRTDMPLSIHGQLLWREFFYTATNNPNFDRMVGNPICVQVPWDKNPEALAKWAECKTGFPWIDAIMTQRLQE  
GWIHHLARHSVACFLTRGDLWISWEEGMKVFEELLDADWSINAGMWLWLSGSSFFQQFFHTYCPASFGRKAD  
PTGDYIRKYLPLVLFKAFPTKIYEPWTAPMEIQVAVRCVIGVDYPLPIVNHAEISQINMERMKQIYHQISLKS  
G  
PLSKYVRRRQRHMMEMTEGVSRLHVFMYGPGNPQNIPLNLSARGIPLQAAKWQMSLQQSKRNHSSSESDDQDRKV  
VRGDSRHMMHNNQ

>Capitella\_tel\_EL012703.1\_CAPTEDRAFT

MPSEGTRKSLRHRETLTGEKGDGRDQVVVHWFHGLRLHDNP SLMEGLRNCKELYPIFILDGEVAGTGTAGY  
NRMRFHLHQCLEDLDSKSFQKFGGRLYIFKGNPVDILAALFDEWQVTKLTFEQDPEPIWEDRDNKVKDLCKMRDV  
TYVERISHTLFHPDDVIEANGGNPPHTFSLMKQVLNMLGDPERPSSPDLSLVSLPLSNDFDDRCALDTLKDF

AGEYEMEEQEEPINKWIGGESRALDLLQGRCLKLEENAFKGGFLQPNQYRPDLIGPPLTSLPHLRFGCLSVRYFY  
YWAIHDIYSEVREELAPQSITSQLIWREYFYIMSVKNRNYAQMENNPICLQIPWYRDDNQLERWEMGKTGYPW  
IDACMNQLRREGWIHHVGRHAVSCFLTRGDLWIHWEDGLKVFLKYLLDADWSVCAGNWMWVSSSAFENCLQCP  
QCFSPIMYGMRMDPTGEYVRRYVPELRQVPLKYLHFHPWKAPKEVQEKAGCIVGTDYPAPMVDHNTASKDCKDR  
MQAVKALYKDPLSILHCAPSNMQEVQRFCWLPDTMATGKMCTADLLCEGIEGM

>Capsaspora\_owc\_XP\_004347271.1\_photolyase

MPRWSIPVRAAATAVGEAAAVKAASAAATPASSEASATVGTAKRRASVDASPSHQPKHARQESDADGDTDQN  
PSPSSNPLLQLGSLHAPPYVTKPKMVDERRIRILPTGADASAPPMPIPSGHDGVLYWMSRDQRVQDNWAL  
IYAQQLAIQHRVPLFVGFCFLVPHFLDATIRQYDFMMEGLREVETALRGLNISFHLFTGTAAEHLPGFVESKRL  
GAVVTD FSPVRVIQRWTTTELANS LAQT TIATTGATQSHTGIPLIQLDAHNVVPCWHASPKLEYAARTIRPKLH  
KLLSEFLTEFPEVAAHPC SARQSPSSPQSARASSAASSNAHFQSGLSAPVDWDAARASLQVNRTITAVPDI  
VPGTRAGMTTLRTFVEQRMRYFGAVRNDPNERVLSNLSFYFHFQGIAPQRAILVAYAAHARCRESVDVFVEEALV  
RRELSDNFCFYNPNYDSIAGASAWAQETLQAHAAGDAREFVYTEEELESATTHDLLWNAAQLEMVREGKMHGFM  
RMYWAKKILEWTASPSEALRIAIHLNDKYNLDGRDPNGYVGCMMWSICGIHDQGWGERPIFGKIRFMNLKGCQR  
KFDVAKYTARFPSTPSSQQAARKRGAAAGGIDRGSNYARATTTTSSNRSTS

>Capsaspora\_owc\_XP\_004349794.2\_photolyase

MSLPPPQPPQSRSLSQLLLQHPPSQAAAAAVPQESRNACHWFRINALRLDDNPALLAAIEYSSSSSSSSSAP  
SASAPTTTSASASHSGTAEPHNTLHNVFVLDPSDATIPSSGLPLVFLLESNTLQSRSLTWLGSHLTILRGQVE  
QVLPDYLSKHDISLVTYEEESTPEPASSQVAQRLEQALHPLRIRQRLETSAFVTHTLYDMNMLLVACKNTPPLT  
YGKFLSLIESIGPPVAPLDAPHRLAERGPAGQTDAAATGGIPSLAELGISEPHTPLMFHGGGETAGQARMHHYLG  
DLARVANF SKPELDPTLFEEPPSSSVMSPYLRFGCVSPRRFFFEINKVYIDSGVTPTQPPVSLLGQLYWREFFY  
LVAAGTPNFDRAAGNPICKQIQWDVNPEYLAAWESGRGTGYPWIDAAMNQLREVGWMHHLARHAVACFLTRGDL  
FLSWELGRDYLQRTLLDADWSISNANWMWMSASAFFHAYFRVYSPITFAQHYDPEGKFVRRFVPALRNFPSEY  
IYMPWSAPLEVQREAGCIVGVDYPKPIVDHEQVCRTNMERMRDAYAQQPDAAALMAVSAVSMLTRQPHDAVTL  
AQMHGQSSGTL SIKSSDSISAPFFKPLDTSANGVADTSRLGDTTSVHSGSTDSIPRAHQKTASEEAARVTNDA  
RRWSTTPVPVLSRDLGQILQQWHADMLQRAQAASQLVHHNHSDEAHRHASEAHHHALEPDSSTSLSSGSVTPP  
SQVGSAGTISNREVHFDPALHSMMA TEVVGQLHPAVGLVADHLNAAISTRVTRRSSEAFGD SHAAAAAAS  
QPGSAKRSRASTPPSVETSTRCTSPKR

>Caranx\_mela\_\_KAG7216105.1

MTKEGDSNQSEKPKRSKNRRQRRKAGGQQQVVGLPCSPSASRPVLLWFRDLRLCDNPALIGSLEVGA  
PVIPIVFIWSP EEEEGPGVTAVAGGACKYWLHQALSCFCSSLETIGSQLVFLKANGESNGIGSVSHFMS  
CCKQNPGSALGVPLDSPESLPTPDHWPQGVPLDTLGLARMPRRKDGTIDWAANIRKSWDFSEEGA  
HARLEAFLHDGVYRYEYESGRADAPNTSCLSPYLHFGQLSPRWLLWDAKGARCRPPKFQ  
RKLAWRDLAYWQLSLFPDLPWESLRPPYKTLRWSTDRGHLKAWQRGTGYPLVDAAMRQLWLTG  
WMNMYMRHVVASFLIAYLHLPWQEGYCWFDTLVDADVAIDAMMWQNGGMCGLDHNFMHPVDA  
AMTCDPYGTYVRKWCPELADLPDEL IHKPWKCPASMLRRAGVVFQGTYPDRIITDLEERRS  
QSLQDVALVRKKFGQYVDKRS GCDLVPLPRASSLRPWAYRTAMVMW

>Caranx\_mela\_\_KAG722414.1

MAQTCIHWFRKGLRLHDNPALLAALRDCKELYPVFILDPYLHNNTRMGINCWRFLIGALKDLD  
CSLRKLN SRLFVVS GKPEDVFPKLFNKWKVTKLTYEYDTEPYLSLRDKKVTTELAKDHQVEVIYRISHTLYD  
TDRIIEENNGKAPLTYNRMQAIVKTLGPPKKPMPAPTME DIKDVKTPCSENHEKTYGIPGLDKLGHNTAA  
IGEECFPGGEQEALRLVEHMERTAWVCSFEKPQTS PNSLSPSTTVLSPYVTFGCLSARTFWWR  
LTEVYQGGKHS DPPPVLHGQLLWREFFYTASVGIPHFNKMEGNPVCTQVDWDTNPEYLA  
AWREARTGFPFIDAIMTQLRQEGWIHHLARHAVACFLT RGD L WISWEEGQKVFAELLLDGD  
WALNAGNWQWLSASTFFHQFFRVYSPVAFGKKTDKNGDYIKKYL PFLKKFPAQYIYEPW  
KAPRSIQQAAGCIVGKDYPHPIVQHEVISKKNIQRMKLAYAKRPSNPTESSKKQGITRKKLEV  
HPF

>Caranx\_mela\_\_KAG7224924.1

MIILSVQLFHW AQRNAEYIVPLYCFDPRHYVGTYNYNLPKTGPFRLRFLLESIRDLRNTLLNKG  
SNLVVRRGKPEDVVAELIKQLGSVSTVAFHEEVTSEELNVETKVKDVC AQMKVKVHTC  
WGCTLYHRDDL PFHMSRLPDVYTQFRKAVETQSMVRPAFPTPEQLKPLPPGLEEGA  
IPTAQDLQQTGECPHDKVATYKETRNLIGVDYSTKFAPWLAVGCISPRYIYHQIKQYERERTANQ  
STYWIFELLWRDYFKFVAVKYGNRLFQLKGLQDKSVPWKKDMKLFNAWKEGRTGVPFV  
DANQRELAMTGFMSNRGRQNVASF LTKDLGLDWRMGAWEFYLIDHDVCSNYGNWLYSAG  
IGNDPRENKRPIHDVCSNENLVRSTDTVVDYDNNLDRLRNPEETRLVCCYVVFIRVLT  
KRTAVSLRCFTKNSTNMAYADPDVMDSIPLSALNVTVRKKLGLYLNP RNAVAADWMSVA  
EEMDFTYLEIQNYVETKNPTAMVLDDWQARSTADTVGKLLSILKKVDRSDAVEDLQPFID  
EDVRRYCENQKKKADPPLQVPEVDSCVPRTPGITLEDQEGAPELFDAFICYCQSD  
FHFVHEMIRELEQTEYRLKLCVFD RDVLP GSCVWTITSELIERCKRMVVVISDEYLD  
SDACDFQTKFALS LCPGARNKRLIPVVKPMTKPFPSILRFLTVCDYTRPCTQAWFWVRLAK  
ALSLP

>Caranx\_mela\_\_KAG7227261.1

LLEPSNCKYKTKHERAHVTGCVKWEQHSYIRVRPRQLVFVFLFGLLCGRSFSEHLLCCMLLCI  
WTRSSSFSSAPRRLKLITHSDQRHTLIPPLLIKSF TSETIMSDKKRKATSAPAGKEPTAKQ  
QKLVP GKEGKKERAEGWLQEQL

REQRSEKKEMKFHKKRLQFISDTEKIKQGSEGVLYWMSRDHRVQDNWALIHAQRLALKEKLPLHICFCLVVPK  
SELSTLRHYSFLLKGLEEVAKECKALDIQFHLLRGSAGEVLPGFVSDRSLGAVVTDIFYPLREPLQQLEDVKKK  
LPKDIPLIQVDAHNIVPCWVASPKLEYAARTIRSKITKLLPEFLTDFPLVEKHYPYTATRTAKPFDWAKTLASL  
QVDRTVGEPKWATPGTKGGMAMLESFIDVRLKLFDTLRNDPNAAALSSLSPIWIRFGHVSAQRVALQVQVRSKGS  
SGQSVASFIEELVVRRELTDNFCFYNNKYDRKTLKDHAQDKRPLYLYTRQQLLEEAKTHDKLWNAQYQMVIEGK  
MHGFRLMYWAKKILEWTSPEEALSIALYLNDRYELDGQDPNGFVGCMWSICGIHDQGWAERPVGKIRYMNY  
KGCTRKFDVARFERTVTSGGGDMHVKVLRWVICNVERICQLE

>Caranx\_mela\_\_KAG7231144.1

MVVNSVHWFRKGLRLHDNPALQEALNGADTVRCVYILDPWFAGAANVGINRWRFLLEALEDLDSSSLKKLNSRL  
FVIRGQPTDVFPRLFKEWKVTRLTFEYDPEPYGKERDGAIIKMAQEFGVEAIVRNSHTLYNLDRIIEMNNNSP  
PLTFKRQFQITIVSRLELPRRPLAPITQQQMDKCRNTIADNHDQLYSIPSLLEELGFRTEGLPPAVWRGGESEALD  
RLNKHLDKKVWVANLEKPRVSTCSLYASPTGLSPYLRFGCLSCRVLYYNLRELYMKLRKRCSPPLSLFGQLLW  
REFFFYTAATNNPNFDRMEGNPICVQIPWDQNPEALAKWAEGRGTGFPWIDAIMTQLRQEGWIHHLARHAVACFL  
TRGDLWISWESGMKVFEELLLDADWSVNAGSWMWLSCSAFFQQFFHCYCPVGFGRRTDPSGDYIRRYIPIILKD  
YPNRYIYEPWNAPELVQKAANCVVGVDPKPKMINHAEGSRLNIERMKQVYQQLSHYRGLSLLASVPTIQEEAE  
PPMTDESQTSSGPDSPRPDVPDSEAAGCSTAPDSSTVCASSAFAPHPILEDTLNTPQTPATHTQPSAAVSSTS  
ASNPPPLAAFPSPSSTPIQSPLSRSPSSPSSSCPTLSPSPSPASNLAQTFPKRKGPRKVRRSQRQRGRQSC  
PPSGREGERRMEEEEKKETAGDESMEENVEPEEERMEETSSEAGLQQ

>Caranx\_mela\_\_KAG7244469.1

MVVNTIHWFRKGLRLHDNPRLDSIRGADTLRCIYILDPWFAGSSNVGINRWRFLHLCLEDLDASLRKLNLSRL  
FVIRGQPTDVFPRLFKEWQITRLSYEYDSEPFYGERDAAIQKLANEAAVEVMVRISHTLYDLDKIIELNGGQP  
PLTYKRFQALINRMDPVELPAETITAIEVIKKCASPIITSDHDDKYGVPSLEELGFEIEGLTTAVWPGGETEALM  
RLERHLERKAWVANFERPRMNANSLASPTGLSPYLRFGCLSCRFLYFKLTDLYRKVKKNSTPPLSLYGQLLW  
REFFFYATATNNPCFDKMEGNPVCVQIPWDRNPEALAKWAEGRGTGFPWIDAIMTQLRQEGWIHHLARHAVACYL  
TRGDLWISWEEGMKVFEELLLDADWSVNAGSWMWLSCSSFFQQFFHCYCPVGFGRRTDPNGDYIRRYLPILRG  
FPARYIYDPWNAPEEVQKAAKCIIGVHYPKPMVNHAEEASRLNIERMKQIYQQLSCYRGLGLLATVPANPNNGA  
NGSNVTGVSTGTSQGGGSSEHPSTQEGTSRTERGQLTQKRREEAPSETSSKSWKQSK

>Carcharodon\_carc\_\_XP\_041029294.1

MNLSRLFSITCQSFCHRHSVICFFRLSFRVWVQSAKQRSNMLKNRKQANREPGCDAEGSDYSKKIEESSKKMA  
TTFSGSSNSVNTSKKESRKELNQDNDNQKEALNLRKEKRVKEITPGLNEGELSNPSNGKKRKEVQQTAAAP  
SRGGDLSESIKKSRSLSTATSVVEEFNYNKKRVRLSKTKGIRDNCQGIYWMSSRDQVRQDNWAFLYAQWLALKH  
KLPLHVCFCFLVPKFHDATIRHFDFMLKGLQEVAEECKQLDISFHLLIGFAKVDLPEFVKENNIGSVVTDIFSPL  
RSPLQWVENVRHNLPEDLQFVQLIDWDAAYAKLQVDLVKEVDWAKPGTAAGLTRMESFIEEQLYKFSTDRNN  
PNKTALSNMSPWFHFGQISVQRAILEIRKYRNKFKDSVDSYIEEAVVRRELADNFCFYNNKYDYKIEGASDWAQ  
KTLKIHSKDQRSHLYTLKQLEDGKTHDPLWNAAQQLQMVLEGKMHGFRLMYWAKKILEWTTSPPEALQFSIYLN  
DRYQLDGKDPNGYVGCMSICGIHDQGWAERPVGKIRYMNYNGCKKKFDVGQFERKYNHKKLTKPL

>Carcharodon\_carc\_\_XP\_041052556.1

MTLEWQSRLEFLLQCLELDSSSLRKLKLSRLFVVQGOPTDVFPRLFKEWNMTRLTFEYDSEPFYKARDATIVK  
LAKNAGIEVVVRTSHTLYDVDRIIANGNNPPLTFKHQFQTIIRLEVPKAPVNMVTLQMEKCTTAVQENHDE  
IYGIPSLLEELGFDTSSELGPAVWQGGETEALARLYKHLQKKASVTNYEKPKLSADSLSSPIGLSPYLRFGCLS  
CRTFFYYTLLQLYRMIKKHSNPPLSLFGKLLWREFFFYTAATNNPSFDKLGQNPICMQIPWDKNQQALTKWAHQ  
TGFPWIDAIMKQLRQEGWIHQLARHAVACFLTRGDLWISWEEVMKVFDDEMLLDADFSVNAGSWMWLLCSALFQ  
QFFQFYCPVGFGRRTDPSGDYVRRYLPVLQGYPTIYIYEPWNAPEVQKAANCIVGVHYPKPMINHLETSQNL  
IERMKQIYQKLSHHKGFCFLVALVPS

>Carcharodon\_carc\_\_XP\_041071962.1

MGRHSIHWFRKGLRLHDNPALLEALLGSDTIRCVYIVDPWFAGSSGVGINRWRFLQCLELDLDASLWKLNSRL  
FVVRGQPADVFPRLFKEWNIISRLTFEYDSEPFYSKERDAAIKKLAIEAGVEVIVQISHTLYDLDIIEERNGGQP  
PLTYKHQFQTLISRMESIEMPVGTITAEAMGKCTTPVFDHDEKYGVPSLEELGFDTEGLPSAVWPGGETEALK  
RLERHLERKAWVANFERPRMNSTSLASPAGLSPYLRFGCLSCRFLYFKLTDLYKKVKKNSSPPLSLYGQLLW  
REFFFYAAATNNPRFDKMEGNPICVQVPWDRNPEALAKWAEKGTGFPWIDAIMTQLRQEGWIHHLARHAVVCFL  
TRGDLWISWEEGMKVFEELLLDADWSVNAGIWMWLSCSSFFQQFFHCYCPVGFGRRTDPNGDYIRRYLPALRG  
FPAKHIYDPWNAPEVQKAAKCIIGVHYPKPMVNHAEEASRLNIERMKQIYQQFSCYRGLGLLASVPSNPNALG  
GAMDYSPGESTHRCSITGRSCLSSSLSSGKQSPGQMPAEGPKVHRQSSN

>Cariama\_cris\_\_KFP56213.1

HLAYSISRIIELNGHKPLTYKRFQAIISRMELPKKPVSTVISQQMETCKVDIQENHDDVYGVPSLEELGFPT  
DGLAPAVWQGGETEALARLDKHLERKAWVANERPRMNANSLASPTGLSPYLRFGCLSCRFLYYRLWELYKK  
VKRNSTPPLSLYGQLLWREFFFYTAATNNPKFDRMEGNPICQIPWDRNPEALAKWAEKGTGFPWIDAIMTQLR  
QEGWIHHLARHAVACFLTRGDLWISWESGVRVFDDELLDADFSVNAGSWMWLSCSAFFQQFFHCYCPVGFGRRT  
TDPNGDYVVKRYLPKLKGFPSRYIYEPWNAPEVQKAAKCIIGVDYKPMVNHAETSRLNIERMKQIYQQLSRY

RGLCLLASVPSCVEDLSGPVTDASAGQGCSTSTAMRLSQADQASPKRKHEGAEEELCTEELYKRAKVTGLPAPE  
IPGK

>Cariama\_cris\_\_KFP63074.1

DNWAFLYAQRLALKQELPLHVCFLVPKFLDAPIRHYGFMLRGLQEVAEECAELNIPFHLLLGCAKDVLPAFV  
VEHGVGGLVTDFCPLRLPRQWVEDVRERLPEDVPFAQVDAHNIIVPCWVASPKQEYSARTIRGKIHDQLPEFLT  
EFPPVVRHPYPPSPCAEPIAWEACYSSQLQVDRTVKEVEWATPGTAAGLAVLQSFIAERLKSFGSHRNDPNKAA  
LSNLSPWFHFGQVSTQRAILEVQKHRGKYKESVDVFVEEAVVRRELAENFCYYNDNYDSVQGAYDWAQTTLKL  
HAKDKRPFLYELQELEQGTTHDPLWNAQLQMVREGKMHGFLRMYWAKKILEWTRSPEEALQFAIYLNDRYEL  
DGRDPNGYVGCLWSICGIHDQGWAERAIFGKIRYMNYAGCKRKFVDSQFERRYAP

>Cariama\_cris\_\_XP\_009694612.1

LPDVYTHFRKAVESEAKVRPTLRMADQLKPLAPGVEEGCIPTMEDLGQKDPVTDPRTAFFPCSGGETQALMRLQ  
YYFWDTNLVASYKETRNLGVMDYSTKFAPWLALGCISPRYIYEQIQKYEKERTANQSTYWVLFELLWRDYFR  
FVALKYGRRIFSLRGLQSKEVPWKKDLQLFDCWKEGKTGVPFVDANMRELAATGFMSNRGRQNVASFLTCKDLG  
LDWRMGAEWFEYLLVDYDVCSNYGNWLYSAGIGNDPRDNRFNMIKQGLDYDGNNDYIRLWVPELRGKIGADI  
HTPWALNSAALSQAGVTLGETYPQPVVTAPEWSRHINQRPQGRSPHLRGRGPAHTPMQHKDRGIDFYFSRKK  
DV

>Cariama\_cris\_\_XP\_009696013.1

ILDNLGGTPPLTYKRFLHVLSSLGDPEVPVRNVTAEDFQRCRPPDPSLAERYRVPLPVDLKIPLLESLSPWRGG  
ETEGQLQRLEQHLTDQGWANFTKPRITPNSLLPSTTGLSPYFMSGCLSVRTFFYRLSNIYAQAKHHSLLPPVSL  
QGQLLWREFFYTASATPNFTKMAGNPICLQISWYEDAELHKKWTAQTGFPPWIDAIMTQLRQEGWIHHLARH  
AVACFLTRGDLWISWEEGMKVFEELLLDADYSINAGNWMWLSASAFFHRYTRIFCPVLFGKRTDPEGQYIRKY  
LPILKNFPISKYIYEPWTASEEAQKQAGCIIGQDYFPFPMVNHEASDHNQLMKQVREEQYRTAQLTRDDTDDP  
MEMKVVRDHSEENISKGVVRMTEKNEIPPEITSWEPKDGKRGEPEAS

>Cariama\_cris\_\_XP\_009703473.1

FLLQCLEDLDANLRKLNLSRLFVIRGQPADVFPRFLFKEWNIAKLSIEYDSEFPFGKERDAAIKKLASEAGVEVIV  
RISHTLYDLDKIIELNNGQPPLTYKRFQTLISRMEPLEMPAETITPEVMEKCTTPVSDDHDEKYGVPSLEELG  
FDTDGLPSAVWPGGETEALTRLERHLERKAWVANFERPRMNANSLLASPTGLSPYLRFGLCLSCRLFYFKLTDL  
YKKVKKNSSPPLSLYGQLLWREFFYTAATNNPRFDKMEGNPICVQIPWDKNPEALAKWAEGRGTGFPPWIDAIMT  
QLRQEGWIHHLARHAVACFLTRGDLWISWEEGMKVFEELLLDADWSVNAGSWMWLSCSSFFQQFFHCYCPVGF  
GRRTDPNGDYIRRYLPVLRGFPKAYIYDPWNAPESVQKAAKCIIGVNYPKPMVNHAESRLNIERMKQIYQQ  
SRYRGLGLLATVPSNPNGNGNGGMLMGYSPGESISGCGSTGGAQLGTGDSHTVQPCALADSHTGASGIQQQ  
QGYCQASSILHYAHGDNQQSHLLQAGRTALGTGISAGKRPNPEEETQSVGPKVQRQSTN

>Castor\_cana\_\_XP\_020027965.1

MAAAVGTVAAATVPAPATGADGASSVHWFRKGLRLHDNPALLAAVRGARCVRVYILDPWFFAASSSVGINRWRF  
LLQSLLEDLDTSLRKLNSRLFVVRGQPTDVFPRFLFKEWGVTRLTFEYDSEFPFGKERDAAIMKMAKEAGVEVVTE  
NSHTLYDLDRIIELNGQKPPPLTYKRFQAIISRMELPKKPVGSVTSQQMESCRADIQENHDDTYGVPSLEELGF  
PTEGLGPAVWQGETEALARLDKHLERKAWVANFERPRMNANSLLASPTGLSPYLRFGLCLSCRLFYRLWDLY  
KKVKRNSTPPLSLFGQLLWREFFYTAATNNPRFDRMEGNPICQIPWDRNPEALAKWAEGRGTGFPPWIDAIMTQ  
LRQEGWIHHLARHAVACFLTRGDLWVSWESGVRVFEELLLDADFSVNAGSWMWLSCSAFFQQFFHCYCPVGF  
RRTPSPGDYIRRYLPKLKGFPKAYIYEPWNAPESIQKAAKCIIGVDYPRPIVNHAEISRLNIERMKQIYQQ  
SRYRGLCLLASVPSCVEDLSHPVAEPGSGNQAGSISSMGPRPLPSGPASPKRKLEAAEEPPGEELNKRARVAELP  
APELPSKDS

>Castor\_cana\_\_XP\_020036490.1

MGVNAVHWFRKGLRLHDNPALKECIQGADTIRCVYILDPWFAGSSNVGINRWRFLLQCLEDLDANLRKLNLSRL  
FVIRGQPADVFPRFLFKEWNIITKLSIEYDSEFPFGKERDAAIKKLATEAGVEVIVRISHTLYDLDFQTLISKME  
PLEIPVETITSEVIEKCTTPLSDDHDEKYGVPSLEELGFDTDGLSSAVWPGGETEALTRLERHLERKAWVANF  
ERPRMNANSLLASPTGLSPYLRFGLCLSCRLFYFKLTDLYKKVKKNSSPPLSLYGQLLWREFFYTAATNNPRFD  
KMEGNPICVQIPWDKNPEALAKWAEGRGTGFPPWIDAIMTQLRQEGWIHHLARHAVACFLTRGDLWISWEEGMKV  
FEELLLDADWSVNAGSWMWLSCSSFFQQFFHCYCPVGFGRRTDPNGDYIRRYLPVLRGFPKAYIYDPWNAPEG  
IQKVAKCLIGVNYPKPMVNHAESRLNIERMKQIYQQLSRYRGLGLLASVPSNPNGNGGMLMGYAPGENIPGCS  
NSGSCSQSGSILHYAHGDSQQTHLLKQGRSSMVTGLSGKRPSQEEDTQSIGPKVQRQSTN

>Casuarinus\_casu\_\_NXE46009.1

RFLQCLEDLDANLRKLNLSRLFVIRGQPADVFPRFLFKEWNIAKLSIEYDSEFPFGKERDAAIKKLASEAGVEVI  
VRISHTLYDLDKIIELNNGQPPLTYKRFQTLISRMEPLEMPVETITPEVMEKCTTPVSDDHDEKYGVPSLEEL  
GFDTDGLPSAVWPGGETEALTRLERHLERKAWVANFERPRMNANSLLASPTGLSPYLRFGLCLSCRLFYFKLTD  
LYKKVKKNSSPPLSLYGQLLWREFFYTAATNNPRFDKMEGNPICVQIPWDKNPEALAKWAEGRGTGFPPWIDAIM  
TQLRQEGWIHHLARHAVACFLTRGDLWISWEEGMKVFEELLLDADWSVNAGSWMWLSCSSFFQQFFHCYCPVG  
FGRRTDPNGDYIRRYLPVLRGFPKAYIYDPWNAPESVQKAAKCIIGVNYPKPMVNHAESRLNIERMKQIYQQ  
LSRYRGLGLLATVPSNPNGNGGMLMGYSPGENISACGSTGGAQLGTGDGHTVGVTALGDSHTGASGIQQQ  
GYCQASSILHYAHGDNQQSHLLQTGRSLGTGISAGKRPNPEEETQSIGPKVQRQSTN

>Casuarius\_casu\_\_NXE46688.1  
KVDYDVCSNYGNWLYGAGIGNDPRDNRKFNVIRQGLDYGSGDYVRLWVPELRDLKGGDIHAPWALSSASLSQ  
AGIALGETYPRPVVTAPEWSRHISQRPQGRGPHPKGRKGAHTPMQHKDRGIDFYFSRKKDL  
>Casuarius\_casu\_\_NXE51766.1  
DNWAFLYAQRLALKQELPLHVCFLVPKFLDATIRHYGFMLRGLQEVAKECTELNIPFHLLLGyakDVLPTFV  
VRLGVGGLVTDfCPLRVPQQWVEDVRERLPEDVPFVQVDAHNIVPCWVTSPKQEYNARTIRSKIHSQlPEFLT  
EFPPVIQHPYSPSTPAEPIAWEACYSSLQVDRTVKEVEWATPGTASGLAVLQSFIAKRLKSFGSHRNNPNKAA  
LSNLSPWfHFGQVSTQRAILEVWKHHRKYKESVDIFVEEAVVRRELADNFCYYNKNYDSVQGAYNWAQNTLKL  
HAKDKRPFLYELQELEQGNTHDPLWNAQLQMVREGKMHGFLRMYWAKKILEWTCSPEEALQFAIYLNDRYEL  
DGRDPNGYVGKLHKGAWGCLWSICGIHDHGWP ERAVFgKIRYMNYAGCKRKFDVVQfFERRYAPCK  
>Casuarius\_casu\_\_NXE54110.1  
MPHRTIHLFRKELRLHDNPTLLAALESSEVVYPIYILDRKFMTSVMNIGALRWHFLLQSLENLQKNLLQLDSC  
LLVIQGEYGAVLRDHVKKWNITQVSLDAEVEPFYKEMEANIRSLGEEELGFEVLSLIGHSLYDAKRILDLNGGT  
PPLTYKRFLHILSLLDPEAPVRNLA AEDfQRCRPPDLCLAEcyRVPLPVDLKIPTeCLSPWKGETEGLQRL  
EQHLMNQGWVASFtkPRTIPNSLLPSTTGLSPYfSLGCLSVRTFFYRLSNIYAQSKHHSLLPPVSLQGQLLWRE  
FFYTVA AATPNFTKMSGNPICLQINWYEDAERLHKWKTAQTGFpWIDAIMTQLRQEGWIHHLARHAAACFLTR  
GDLWISWEEGMKVFEEMLLDADYSINAGNMMWLSASAFFHQYTRIFCPVRfGKRtDPEGQYIRKYLpILKNFP  
SKYIYEPWTASEEEQKEAGCIIGQDYPFPMVNHKEVSDHNLQLMKRVREEQYRTAQLTRDDADDPMEMKMKRD  
HSEENVKKGKVARTTE  
>Casuarius\_casu\_\_NXE56516.1  
CIYILDPWFAASSAVGINRWRfLLQSLEDLDNSLRKLSSRLfVVRGQPTDVfPRLfKEWGVTRLTfEYDSEPF  
GKERDAAIVKLAKAKEAGVEVVIENSHTLYDLDRIIELNGHKPPLTYKRfQAIISRMElpKKPVSSIIISQOMETC  
KVDIQENHDDVYGVPSLEELGFPTDGLAPAVWQGGETEALARLDKHLEKAWVANYERPRMNANSLLASPTGL  
SPYLRfGCLSCRLfYYCLWELyKKVKRNSTPPLSLYgQLLWREffYTAATNNPKfDRMEGNPICIQIPWDRNP  
EALAKWAEGKTGFpWIDAIMTQLRQEGWIHHLARHAVACFLTRGDLWISWESGVRVfDELLLDADfSVNAGSW  
MWLSCSAFFQqFFHCYCPVGfGRRTDPSGDYVKRYLPKLKGfPSRYIYEPWNAPESVQKAACCIIGVDYPKPM  
VNHAETSRLNIERMKQIYQQLSRYRGLCLLASVPCVEDLSGQVADPALGHSSSTSTVMRLPQSDQTSPrKkHE  
GAEElCTEELYKRAKVGGlpAPEIPGKSL  
>Catenaria\_ang\_ORZ31450.1\_FAD\_bindin  
MKKLTTLLWfRRDLRLHDHPALLHAVSTsATLfPVYCLEVPTKKRCGHLRWfLLESLADLDSQLRALGSRLf  
VVRGKAPDVLpQLVKAWAVDQVLVQSSPEPFARARDEEVAQRVAKEGGEfHGfPGRTLfEVSQLLAGAGNGAS  
DKGIPLPVTMTGfAKVADRLTVPKPEPAPTSIPLPLDSEsALHQLKSLLDPVsfASLTGPHHDLSLPRISPTD  
HTVPELGLLTPLAARSPhTGGESHALARLDtYMSHTAKVLAfEKPKTSpAALPDfVTGLVDtTVLSPYMTYGC  
LSPrLfHSRITSAYRAAKGKHSKPPVSLLAQLYWREffFAHGATVDGFELATEANPTCPTIDWRLLSADSD  
PEAHDDLKAWAEARTGYPWIDACMTQLRSEGWIHHLGRHSLACFLTRGDLYISWERGAEVfEDVLLDHDWALN  
RGNWAWLSGTSVfFRQWfRVYSPVKWGQSWDAEGKYIKRHLPQLAKfPKQYIYEPWKAPLAVQKQAGCIVGKD  
YPKPIVDHAEASKANMAKLKACfARGRDKNAGEDeGDADEDIEKDKVGSSRAGRAAARDVRKR  
>Catenaria\_ang\_ORZ37966.1\_DNA\_photol  
MPKAAASSSKGKNRSHADITDESTDEQpNTMSPASHSRPASAAIAAAASAATKHARRSGPVVfWFRKDLRLR  
DNKGlyKAWVQAahVNRTATTGGGDPmNGALLGIfVVCGRQWHHDLSPAKVDLMLRSVQSLQERMESpQLNI  
PLTILHARNIKHVPQVVKEYLAKVKATHLYfNVEYEVDEGRDDTVAELVQQAPlNVTCVPTHDECvVPGLV  
KTKDGTRTPVVYTPFRKSWESLVKSKQPYDYLALSPAEPNPMAVRTCKLGAGLfGTRVPDPTADGVDATAEL  
PGFEREFVPSVLEHTRANYLGTEDAAHARLVAFAHNKIKSYSDRDfPNLDGTANISAYLALGLISARQCITI  
AREANGLLDsgDKGCvHWIqEIVWREFYRHILVAFPRVCMNQPFKLDTLNVpWTSgDEEEAYfTLGARARRL  
KTTGfMSNRLRMITAMFLTKDLLVDWRKGEKYfMQHLVDGDLASNNGGWQWAASGTDSQPYfRIfNPWLQSV  
KfDPRGDFIRKYVPELRPItKAASVHEPHTKLTTSEfMRLGYVQPIVDHKKARDRVLKAFKVDpDQAH  
>Centropus\_beng\_\_NXX91158.1  
KVDYDVCSNYGNWLYSAGVGNDPRENRKFNMIKQGLDYGNGDYVRLWVSELQGIKGADIHIPWALSSAALSQ  
AGVILGATYPLPVVtTPEWSRHISQSLQGRSPHPKGRRAPAHtPALHRNRGIDFYfSHKKDV  
>Centropus\_beng\_\_NXX91360.1  
RfLLQSLEDLDNSLRKLNSRLfVVRGQPTDVfPRLfKEWGVTRLTfEYDSEPFgKERDAAIVKLAKAKEAGVEV  
IENSHTLYDLDRIIELNGHKPPLTYKRfQAIISRMElpKKPVSTVMsQQMETCKVDIQENHDDVYGVPSLEEL  
GFPTDGLAPAVWQGGETEALARLDKHLEKAWVANYERPRMNANSLLASPTGLSPYLRfGCLSCRLfYYRLWE  
LYKKVKRNSTPPLSLYgQLLWREffYTAATNNPKfDRMEGNPICIQIPWDRNPEALAKWAEGKTGFpWIDAIM  
TQLRQEGWIHHLARHAVACFLTRGDLWISWESGVRVfDELLLDADfSVNAGSWMWLSCSAFFQqFFHCYCPVG  
fGRRTDPSGDYVKRYLPKLKGfPSRYIYEPWNAPESVQKAACCIIGVDYPKPMVNHAETSRLNIERMKQIYQQL  
LSRYRGLCLLASVPSCVEELSGPVtDSASGQGCSTSTAMRLSQTdQASPrKkHEGAEElGTEELYKRAKVtGL  
PAPEIPGKSL  
>Centropus\_beng\_\_NXX98999.1

DNWAFLYAQRLALKQELPLHVCFLVPKFLDATIRHYGFMLKGLQEVAKECAELNISFHVLLGYAKDVLPAFV  
VEHGVGGLVTDFCPLRLPRQWVEDVRERLPEDVPFAQVDAHNIVPCWVTS PKQEYSAWTIRSKIHAQLPEFLT  
EFPSVIRHPHSPSCPAQPIAWEACYSSLQVDRVTGVEVWATPGTAAGLAVLHSFITERLKFFSSHRNDPNKAA  
LSNLSPWLHFGECPQASHPTAHTSSPTCSLPVPPGQVSTQRAILEVQKHRSKYKDSVDVFVEEAVVRRELSE  
NFCYYNENYDSVQGAYDWAQTTLLKLHAKDKRPFLYKLELEQGTTHDPLWNAQLQMVRREGKMHGFLRMYWAK  
KILEWTNSPEEALRFAIYLNDRYELDGRDPNGYVGCLWSICGIHDHGWGERAVFGKIRYMNYAGCKRKFDVGQ  
FERRYGPCT

>Centropus\_beng\_\_NXX99936.1

RILDNLNGGTPPLTYKRFLHILSLLDGPEVPVHTPTAEDFQSLTPRGAECLCSQGLGRLHLESWGQFWAPHSK  
KDLEGLERVQRREWSWGRGWVASFTKPRITIPNSLLPSTTGLSPYFSMGCLSVRTFFYRLSNIYAQAKHHS LPP  
VSLQGQLLWREFFYTVA AATPNFTRMAGNPICLQISWYEDA EKLHRWKTAQTGF PWIDA IMTQLRQEGWIHHL  
ARHAVACFLTRGDLWISWEEGMKVFEELLLDADYSINAGNWMWLSASAFFHQYTRIFCPVRFGRKRTDPEGRI  
RKYLPI LKNFPSKYIYEPWTASEEEQKQAGCIIIGEDY PPFMV D HKEASDHNL ELMRQVREEQHRTAQLTRDDA  
DDMEMMKVKREHSEECTSKGKVAKVTE

>Centruroides\_scu\_XP\_023242183.1\_cry-1-like

MSNSKEKNVHWFRLKGLRLHDQPSLREGLINSTTWRCVFI LDPWFAGSSNVGINKWRFL LQCLDDLDASLRKL  
NSRLFVIRGQPADVF PRLFKWKVTHLTFEKDPEPYGRIRDQ NITVMAQEMGITVISRTSHTLYNLEKIIKKN  
GDKTPLTYKQFQSVLATMEPPPPPPQPTITQELLKNSSTPIFEDHDDKYGVLTLEELGFDTEGLKPAIWQGGGT  
ESLIRLERHLERKAWVASFGRPKMTPQSLLPSQTGLSPYLRFGCL SARLFYQQLTDLYKKIKKANPPLSLHGQ  
LLWREFFYCSATNNPNFDRMLNPNPICVQIPWDINPEALAKWANGQTGF PWIDA IMSQLREEGWIIHVARHAVA  
CFLTRGDLWISWEEGMKVFEELLLDADWSVNAGSMMWLS CSSFFQ QFFHLYCPVRFGRKADPNGDYIRRYLPV  
LKNFPTKY LH EPWTAPEKVQVAVKCIIGKDYPLPIVNHQDVSRINLERMKQVYQQLNQYHG VFYQVFQHNPHC  
LLHPQIIHQKCLKAQNINLMSASTIITISQHLSNLNIQKLN

>Ceratotherium\_simum\_simum\_XP\_014647998.1\_PREDICTED:

MAAAAVVTGAGAAPAAAAAAGADGASSVHWFRLKGLRLHDNPALLAAVRGARCVRVYILDPWFAASS  
SVGINRWRFL LQSLLEDLDTSLRKLNSRLFVVRGQPADVF PRLFKEWGVTRLTFEYDSEPF GKERDAAIMKMAK  
EAGVEVVTENSHTLYDLDRIIELNGQKPLTYKRFQALISRMELPKKPVGSVTSQQMES CRAEIQENHDETYG  
VPSLEELGFPTTEGLGPAVWQGGETEALARLDKHLERKAWVANYERPRMNANSL LASPTGLSPYLRFGCLSCRL  
FYYRLWDLYKKVKRNSTPPLSLFGQLLWREFFYTAA TNNPRFDRMEGNPICIQIPWDRNPEALAKWAEKGTGF  
PWIDA IMTQLRQEGWIHHLARHAVACFLTRGDLWVSWESGVRVFD ELLDADFSVNAGSMMWLSCSA FFQ QFF  
HCYCPVGFGRRTDPSGDYVRRYLPKLKGFP SRYIYEPWNAPE SVQAAKCIIGVDYPRPIVNHAETSRLNIER  
MKQIYQQFSRYRGLCLLASVPSCVEDLSNPVAEPSSSQAGSMSSAGPRPPSPGPASPKRKLEAAEEPPGEELG  
KRARVAEPPAPELPGRDV

>Ceratotherium\_sim\_XP\_014636064.1\_cry-1\_X2

MGVNAVHWFRLKGLRLHDNPALKECIQGADTIRCVYILDPWFAGSSNVGINRWRFL LQCLEDLDANLRKLNSRL  
FVIRGQPADVF PRLFKEWNITKLSIEYDSEPF GKERDAAIKKLATEAGVEVIVRISHTLYDLDKIIELNGGQP  
PLTYKRFQTLISKMEPLEIPVETITSEVMEKCTTPLSDDHDEKYGVPSLEELGFDTDGLPSAVWPGGETEALT  
RLERHLERKAWVANFERPRMNANSL LASPTGLSPYLRFGCLSCRLFYFKLTDLYKKVKKNSSPPLSLYGQLLW  
REFFYTAA TNNPRFDMEGNPICVQIPWDKNPEALAKWAEGR TGFPWIDA IMTQLRQEGWIHHLARHAVACFL  
TRGDLWISWEEGMKVFEELLLDADWSINAGSMMWLS CSSFFQ QFFHCYCPVGFGRRTDPNGDYIRRYLPVLRG  
FPAKYIYDPWNAPEGIQKVAKCLIGVNYPKPMVNHA EASRLNIERMKQIYQQLSRYRGLGLLASVPSPNPNGNG  
GLMGYSPGENIPGCSSSGRRSSMG TGLSSGKRPSQEEDTHSIGPKVQRQSTN

>Cervus\_cana\_\_XP\_043295754.1

MGVNAVHWFRLKGLRLHDNPALKECIQGADTIRCVYILDPWFAGSSNVGINRWRFL LQCLEDLDANLRKLNSRL  
FVIRGQPADVF PRLFKEWNITKLSIEYDSEPF GKERDAAIKKLATEAGVEVIVRISHTLYDLDKIIELNGGQP  
PLTYKRFQTLISKMEPLEIPVETITSEVIEKCTTPLSDDHDEKYGVPSLEELGFDTDGLPSAVWPGGETEALT  
RLERHLERKAWVANFERPRMNANSL LASPTGLSPYLRFGCLSCRLFYFKLTDLYKKVKKNSSPPLSLYGQLLW  
REFFYTAA TNNPRFDMEGNPICVQIPWDKNPEALAKWAEGR TGFPWIDA IMTQLRQEGWIHHLARHAVACFL  
TRGDLWISWEEGMKVFEELLLDADWSINAGSMMWLS CSSFFQ QFFHCYCPVGFGRRTDPNGDYIRRYLPVLRG  
FPAKYIYDPWNAPEGIQKVAKCLIGVNYPKPMVNHA EASRLNIERMKQIYQQLSRYRGLGLLASVPSPNPNGNG  
GLMGYSPGENIPGCSSNASCTQSGSILHYAHGDSQQTHLLKQGRSSTGTGLSGSKRPSQEEDTQSIGPKVQRQ  
STN

>Cervus\_cana\_\_XP\_043336967.1

MAAAAAGTTSAAAAAQAPAAARGDASSVHWFRLKGLRLHDNPALLAAVRGAHCVRVYILDPWFAASSSVGINR  
WRFL LQSLLEDLDRSLRKLNSRLFVVRGQPADVF PRLFKEWGVTRLTFEYDSEPF GKERDAAIMKMAKEAGVEV  
VTENSHTLYDLDKIIELNGQKPLTYKRFQAIISRMELPRKPVGSMTSPQMEGCRAEIQENHDETYGVPSLEE  
LGFPTEGLGPAVWRGGETEALARLDKHLERKAWVANYERPRMNANSL LASPTGLSPYLRFGCLSCRLFYRLW  
DLYKKVKRNSTPPLSLFGQLLWREFFYTAA TNNPRFDRMEGNPICIQIPWDRNPEALAKWAEKGTGF PWIDA I  
MTQLRQEGWIHHLARHAVACFLTRGDLWVSWESGVRVFD ELLDADFSVNAGSMMWLSCSA FFQ QFFHCYCPV  
GFGRRTDPSGDYIRRYLPKLKGFP SRYIYEPWNAPE SIQKAAKCVIGVDYPRPIVNHA EASRLNIERMKQVYQ

QLSRYRGLCLLASVPSCVEDLSNPVAEPSSSQAGSSSSAGPRPLPGGPASPKRKLEAAEPPGGELSKRARVA  
ESLPSELPSRGV

>Chaetura\_pela\_\_KFU84257.1

DNWAFLYAQRLALKQELPLHVCFLVPRFLDATIRHYGFMLRGLQEVAKECTELNIPFHLLLGyakDVLPTFV  
AEHGVGGLVTDfCPLRVPRQWVEDVKERLPLDVPFAQVDAHNIVPCWVASPKQEYSARTIRGKIHAQLPEFLT  
EFPPVIRHPYPPSPCAEPIAWEACYSSLQVDRTVKEVEWATPGTAAGLAVLQSFIERLKSFGSHRNDPNKAA  
LSNLSPWFHFQISTQRAILEVRKHRDKYKESVDAFMEEAVVRRELAENFCYYNENYDSVQGAYDWAQTTLNL  
HAKDKRPFLYKLQELEQGATHDPLWNAQLQMVREGKMHGFLRMYWAKKILEWTRSPEEALQFAIYLNDRYEL  
DGRDPNGYVGKLQERSTGRRGCLWSICGIHDQGWAERAIFGKIRYMNYAGCKRKFDVQGQFERRYAP

>Chaetura\_pela\_\_KFU85512.1

GANARRFLLALQDLDSLSREIGSRFLFVARGCPPEVLPHLFRAWGTTRLTTFEVDTEPLTRQSDATVAELAAQH  
GVEVIREVSHTLYDTERVLALNNGKAPLTYKHLQSLLASLGPPEKPAPALTQEHLLQGCFTPCQASHDINYGIP  
TLEELGHDPSEVGPQLYPGGETAALARLDMFMERTAWVCGRKPEPETEPTSLRPSTTVLSPYLTGLCLSVRTFW  
WRLDEVYQRQREHSQPPVSLHGQLLWREFFYTAGASIPNFDPMVGNPVCLOVDWDDNPQHLCAWREGRTGYPF  
IDAIMTQLRTEGWIHHLARHAAACFLTRGDLWISWEKGLKVFEELLLDADWSLNAGNWLWLSGSAFFHRYFHI  
YSPVAFGKKTD RDGAYIRKYLPIKDFPAKYIYEPWKAPQAVQERAGCLVGYTHYPLPIVEHGVARERNLGRMK

>Chaetura\_pela\_\_KFU91102.1

RFLQLSLEDLDSLRKLNSRLFVVRGQPTDVFPRFLFKEWGVTRLTTFEYDSEPFGERDAAIVKLAKEAGVEVV  
IENSHTLYDLDRILNNGQKPLTYKRFQAIISRMDLPKKPVSTVMSQQMETCKVDIQENHDDVYGVPSLEEL  
GFPTDGLAPAVWQGGETEALARLDKHLERKAWVANYEKPRMNANSLASPTGLSPYLRFGCLSCRLFYRLWE  
LYKKVKRNSTPPLSLYGQLRGREFFFPAATNNPKFDRMEGNPICIQIPWDRNPEALAKWAEGKTGFPPWIDAIM  
TQLRQEGWIHHLARHAVACFLTRGDLWISWESGVKVFDELLEDADFSVNAGSMMWLSCSAFFQQFFHCYCPVG  
FGRRTDPSGDYVKRYLPKLKGFPSRYIYEPWNAPESVQKAAKCIIGVDYPKPMVNHAETSRLNIERMKQIYQQ  
LSRYRGLCLLASVPSCVEDLSGPVTDASASQGCSTSAAMRLSQADQASPKRKHEEAELCTEELYKRAKVTGL  
PAAEIPGKS

>Chaetura\_pela\_\_XP\_009992545.1

MSHRTIHLFRKGLRLHDNPTLLAALESSQVIYPVYILDEKFMTSVMHMGTLRWHFLLQSLEDLQKNLCQLGSC  
LLVLQGEYELVLRDHVQKWKITQVTLDAEMEPFYKEMEANIRHLGDELGFVLSLVGHTLYNTQRILELNGGN  
PPLTYKRFLHILSLLDGPEVPVRSVTAEDFQRCRPPDPGLAGCHRVPLPVDLKIPIENLSPWRGGETEGLRRL  
ERHLTDQGWVANFTKPRITPNSLLPSTTGLSPYFSLGCLSVRTFFYRLSNIYAQAKDHSLPPVSLQGQLLWRE  
FFYTVASATPNFTRMAGNPICLQISWYEDAEQLHKWKAQTGFPPWIDAIMTQLRQEGWIHHLARHAAACFLTR  
GDLWISWEEGMKVFEELLLDADYSINAGNMMWLSASAFFHQYTRIFCPVRFGKRTDPQGHYIRKYLPLVKNFS  
SKHIYEPWTASEEEQKEAGCIIGRDYPFPMVNHFAASAHNLQMRQVREEQHRTAQLTRDDTDDPMEMKVKRD  
HSEENVSRGKVTRMGQEOTEVPSGIAPGEPKSGQGGDPEES

>Chaetura\_pela\_\_XP\_010004154.1

MAVFLQLCLEDLDANLRKLNSRLFVIRGQPADVFPRFLFKEWNIAKLSIEYDSEPFGERDAAIKKLASEAGVE  
VIVRISHTLYDLDKIILNNGQPPLTYKRFQTLISRMEPLEMPVETITPEVMEKCTTPVSDDHDEKYGVPSLE  
ELGFDTDGLPSAVWPGGETEALTRLERHLERKAWVANFERPRMNANSLASPTGLSPYLRFGCLSCRLFYFKL  
TDLYKKVKKNSSPPLSLYGQLLWREFFYTAATNNPRFDKMEGNPICVQIPWDKNPEALAKWAEGRTGFPPWIDA  
IMTQLRQEGWIHHLARHAVACFLTRGDLWISWEEGMKVFEELLLDADWSVNAGSMMWLSCSSFFQQFFHCYCP  
VGFGRRTPNGDYIRRYLPVLRGFPKYYIDPWNAPESVQKAAKCVIGVNYPKPMVNHAESRLNIERMKQIY  
QQLSRYRGLGLLATVPSPNPNNGNGGLMGYSPPGESVSGCGSTGGAQLGTGDGHTVVQPCALGDLHTGASGIQQ  
QGYCQASSILHYAHGDNQQHLHLQAGRTTLGTGISAGKRPNPEEETQSVGPKVQRQSAS

>Chaetura\_pela\_\_XP\_010004307.1

MEERKDEETEEKSRYCLLNPPASGFAEFFLENVICNSVTSTEHAKRKTIGARDMVLWSWAESSDFVIPLYCFDP  
RHYLGTRSFGFPRTGPHRLRFLLESVRDLRETLKKKGSTLVVRKGKPEDVVCDLITQVGSVS AVAFHEEATQE  
ELDVEKGLCQVCSQHGVKIQTFWASTLYHRDDLPRPIARLPDVYTHFRKAVESQVKVRPTLPVADQLKPLPP  
GLEEGCIPTMEDLGQKDPVTDPRTAFCSSGETQALMRLQYYFWDTNLVASYKETRNLVGMDDYSTKFAPWLA  
LGCISPRYIYEQIKKYEKERTANESTYWVLFELLWRDYFRFVALKYGNRIFSSRGLQSKEIPWKKDLQLFDCW  
KEGRTGVPFVDANMRELAATGFMSNRGRQNVASFLT KDGLDWRMGAEWFEHLLVDYDVC SNYGNWLYSAGVG  
NDPRDNRKFNMVKQLDLDYDNGDYVRLWPPELQGIKADVHTPWALNSAALSQVGITLGDIIYPQLVTAPEWS  
RHISQRLQGRCPHPRGRRGPAHTPMQHKGRGIDFYFSPKKDV

>Channa\_argu\_\_KAF3686229.1

MLSNNDFLRKHEPSGNREARFRLVSMAHQCIHWFRKGLRLHDNPALMAALRDCKELYPVFILDPNLYNTTSVG  
INRWRFILGALKDLDCSLKKLDSRLFVVRGKPEDVFPFLFKKWKITAMTYEYDTEPYSLTRDKKVAALAKEHG  
VKVVKYISHTLYDIDRIIEENNGKPPPLAYKRLQAIKSLGPPKRPIPAPTMEDEMDVTPCSEQHEQTYGIPT  
LEELGRDTAALGEELFPGGEQEALRRLDEHMKRTGWVCSFEKPETSPNSLSPSTTVLSPYVTFGCLSARTFWW  
RLADVYQGGKHSLLPPVSLHGQLLWREFFYTASVGIPNFNKMESNPVCTQVDWDTNPEYLAAREARTGFPFID  
AIMTQLRQEGWIHHLARHAVACFLTRGDLWISWEEGQKVFEDLLLDGDWALNAGNWQWLSASTFFHQFFRVYS

PVAFGKKTDKRGDYIRKYLPFLKKFPAEYIYEPWKAPRSVQQAAGCIVGKDYPRPIVQHEVVSKRNVQRMKVA  
YAKRSPHPTESPSKSPSKKRGDVIMDEILFKKQRKV

>Channa\_argu\_\_KAF368887.1

MSLSVAGVEDNEVIVRKMLRDVLGGREDPEGFFAMCVSVLGHQETRSQFLYLIHPLSTAHSLSILTSIYKD  
YFTTLQAEDEDEVELAMALSLEEMKDHQLSTPSQESRLMQLEDKTNQSCSFLNDSHPQEGSHTLLPEVVKRR  
QNTHSAPISPWGNGPAPTTHVDIYNQETVIEREQMMMERDLTQSEKPKHMKNNRRQRRKPAGQHIVGLPFSLS  
PPPVLWFRDLRLCDNPALNASLEVGAIPVFIWSSKEEEGPGTTVAMGGASKYWLHQALSCLCASLERIS  
SHLVFLKANGEGSRVGSSNLTKLIKDTGARTVLANALYEPWLKERDDAVVSALQEDGIECRMYHSYCLRDP  
YSVSTEGVGLRGIGSVSHFMSCCRQNPGSALGVTLDPFVSLPTPAHWPQGVSLDTLGLARMPRRKDGTTINWA  
ANIHKSWDFSEEGAHVWLKAFLEDGVYRYDKESCRADAPHTSCLSPYLHFGQLSPRWLLWAAKGARGQSPKFQ  
RKLYWRDLAYWQLTLFPDLPWESVRPPYKALRWSSSRDHLKAWQQGRTGYPLVDAAMRQLWMTGWMNNYMRHV  
VASFLIAYLHLPWQEGYCWFDTLVDADVAIDAMMWQNGGMCGLDHNFMVMPVDAAMTCDPYGNYVRKWCPE  
LAELPDELIHKPWKCPTSMLRRAGVAFGQTYPQRIITDLEERSQSLQDVARVRKEFEQFVDKHTGCDLVPLP  
PRLVTEALGLSQRYSGVASEGKRFLPLITRMEFKYQQENPHADAALNPYNALLKGYSRKRDETI AFLNERD  
FTASVMYEA VQRKERLECDQRRMEGLPLSPAPQGRARRTTTAKDKFSIVPGGAGTSLR

>Channa\_argu\_\_KAF3689050.1

MVASTIHWFRKGLRLHDNP SLRESIRKADTLRCIYILDPWFAGSSNVGINRWRFL LQCLEDLDASLRKLN SRL  
FVIRGQPTDVF PRLFKWKITHLSYEYDSEPF GKERDAAIQKLASEAGVEVIVRISHTLYDLDKI IELNGGQP  
PLTYKHFQAI INHMDAVELSVETITSEVIKTCSTPISEDHDDKFGVPSLEELGFETEGLTTPVWP GGETEGLM  
RLERHLERKAWVANFERPRMNANSL LASPTGLSPYLRFGCLSCRLFYFKLTELYRKVKKNSTPPLSLYGQLLW  
REFFYTATNNPCFDMEGNPVCVRI PWDRNPEALAKWAEGR TGFPWIDAIMTQLKIEGWIHHLARHAVACFL  
TRGDLWISWEEGMRVFEELLLDADWSVNAGSWMWLSCSSFFQ QFFHCYCPVGFGRRTDPSGDYIRRYLPVLRG  
FPSRYIYDPWNAPEEVQKAAKCIIGVHYPKPMVSHAEASRINLERLKQIYQQLSCYRGLGLLATVPSNPNGA  
KGSVADINTGTNEAPGGSSKDPSIKGGTSQTERKSTQKRCHEETPPESSPKCWRQSK

>Channa\_argu\_\_KAF3689281.1

MAVNSVHWFRKGLRLHDNPALQEALSGADTVRCVYILDPWFAGAANVGINRWRFLLEALEDL DSSLKKLN SRL  
FVVRGQPTDVF PRLFKWKVTRLTFEYDPEPYGKERDGA I IKMAQEFGVETVVRNSHTLYNL DRI IEMNNNSP  
PLTFKRQFQTI VSRLELPRRPLLPVTQQQMDKCLTKIADNHDQLYSIP SLEELGFRTEGLPSTVWRGGESEALD  
RLNKHLDKKVWVANFEHSRVNTCSLYASPTGLSPYLRFGCLSCRVLYYNLRELYMKLRKRCS PPLSLFGQLLW  
REFFYTAATNNPNFDRMEGNPICVQIPWDQNPEALAKWAEGR TGFPWIDAIMTQLRQEGWIHHLARHAVACFL  
TRGDLWISWESGMKVFEELLLDADWSVNAGSWMWLSCSAFFQ QFFHCYCPVGFGRRTDPSGDYIRRYIPILKD  
YPNRYIYEPWNAPE SVQKAANC VGVDPYKPMVNHAESSRLNIERMKQVYQQLSHYRGLSLLATVPTIQEEAE  
PPMTDDSQTSSGPDSPHRFP GDSEAAGFSIAPDSSTA FPPSSSSAPCPDLEDSTNSHAPQTLYTSSSSHIQ PST  
AITSTS AIHFPTGAPPSVGSTLAQSPLSTSKPSSPSPSCSTLFPFP SLAMTPTQTSC LQGRRKVLARKVRRS  
QKQCGRQC GTPSTKETGGKMNEEERE EVGGEERMEEEPEQDERMEEDTCGETTGYQ

>Channa\_argu\_\_KAF3699093.1

MSEKRKSTSDGAAGEGPSAKQQKVSSMKKERAGGWLVLDLVNQQRSEIKGSMFNQKRLRFINDTKKIKQSGK  
VLYWMSREQRVQDNWALIH AQQLAVQEEVPLHVCVCLVVS KSELSTLRHYSFMLKGLQEVAQECKTLNIQFHL  
LHGTA GEILPGFVSDHSLGAVVTDFSP LKAPLQWLEDVKKNLPKEIPFLQVDAHNIVPCWVASPKLEYSARTI  
RGKITNLLPEFLTDFPLVERHPYTATRIAKPIDWNKT LGS LQVDRSVGETEWAKPGTKAGMAMLESFIDVRLK  
LFGTQRNDPNAAALSQ LSPWIRFGHLSAQRVALEVKRNGKGKDNSVGSFIEELVVRRELTDNFCYYNKKYDSV  
EGAYMWAQKTLKDHANDKRPYLYTCEQLEKAQTHDKLWNAAQYQMVVDGKMHGFLRMYWAKKILEWTSSPEEA  
LSIALYLNDRYELDGD PNGFVGCMWSICGIHDQGWGERPIFGKIRYMNKYGCTRKFDVAKFEKNYCPKKL

>Channa\_argu\_\_KAF3703631.1

MSTCRTI IYLLRNDLRVHDNELFHW AQRNAEYIVPLYCFDPRHYEGTTNYNLPKTGPFR LHFLLESIRD LRNT  
LINKGSNLVVRGKPEHVVAELIQ QLESVSTVAFHKEVTSEELSVEKKLKDVCDQMKVKVHTCWGSTLYHIDD  
LPFHHISGLPDVYTQFRKAVETQSRVRPVLPTPEQLKPLPPGLEGA IPTAGDLQQTEPVTDP RSAPFCSGGE  
SQALARLKHYFWD TNVASYKETRNGLIGVDYSTKFAPWLALGCISPRYIYHQIRQYERERTANQSTYWVIFE  
LLWRDYFRFVGKYGNRIFQVKGLQEKSIPWKKDMKLFSAWQEGRTGVFPFVDANMRELLMTGFMSNRGRQNV  
SFLT KDLGLDWRMGAEWFEYLLIDYDVCSNYGNWLYSAGVGNDPRENRKFNMIKQGLDYDNNGDYVRQWVPEL  
QNIRSADVHTPWT LSTAALSHAQVSLGENYPVPIVIAPEWSRHVNKTS GTGPSRPGKKGPSHTPKQHRDRGID  
FYFSRSKNL

>Chanos\_chanos\_XP\_030625976.1\_cryptochro

MVVNSVHWFRKGLRLHDNPAL EELNGADTVRCVYILDPWFAGSANVG VNRWRFLLESLEDLDTSLRKLNSRL  
FVVRGQPTDVF PKLFKEWNVTRLTFEYDSEPYGKERDGA I IKMAQEFGVETIVRNSHTLYNP DRI IEMNNNSP  
PLTFKRQFQAI INKLELPRRPLPTITKEQMDRCRTKISDNHDEHYSVPSLEELGFKNQGSAAVWKGGETEAL E  
RLSKHLDRKAWVANFERPRINSSSLFASPTGLSPYLRFGCLSCRVFYYNLRELYMKLRKRSSPPLSLFGQLLW  
REFFYTAATNNPNFDRMEGNPICVQIPWDHNPEALAKWAEGR TGFPWIDAIMTQLREEGWIHHLARHAVACFL  
TRGDLWISWERMKVFEELLLDADWSVNAGSWMWLSCSAFFQ QFFHCYCPVGFGRRIDPSGEYIRRYIPKLKD  
YPNRYIYEPWNAPE SVQKAANC VGVDPYKPMINHAESSRLNIERMKQVYQQLSHYRGLSLLASVPTIQEEAE

PPTSDDSSQASSSTSGPVPTPASTPTPDPASTQQQQQQQQQQAIAIIPAQRKRGRPAELQSTQKSKVQHTSQ  
AKADDQSEDKQ

>Chanos\_chanos\_XP\_030646865.1\_cryptochro

MVVNTIHWFRKGLRLHDNP SLRDSIQGADSLRCVYILDPWFAGSSNVGINRWRFLQCLEDL DASLRKLN SRL  
FVIRGQPTDVF PRLFKWKIKRLSYEYDSEPF GKERDAAIKKLANEAGVEVIVRISHTLYDLDKI IELNGGQS  
PLTYKRFQTLISRM DPVEMPAETITAEVMGKCATPVNDDHDDKFGVPSLEELGFETEGLSSAVWPGGETEALT  
RLERHLERKAWVANFERPRMNANSL LASPTGLSPYLRFGCLSCRLFYFKLTDLYRKVKKNSIPPLSLYGQLLW  
REFFYTAATNNPRFDKMEGNPICVQIPWDRNPEALAKWAEGR TGYPWIDAIMTQLRQEGWIHHLARHAIACFL  
TRGDLWISWEEGMKVFEELLLDADWSVNAGSMMWLS CSSSFFQQFFHCYCPVGFGRRTDPNGDYIRRYLPILRG  
FPAKYIYDPWNAPESVQKAAKCIIGVHYPTPMVNHAEEASRINIERMKQIYQQLSCYRGLGLLATVPSNSGGDG  
TGAGLGTGTGHVSGDSSQENTTTAHQIPTNTRGDL LGMAACSHGDQQPSTSAQQQQGYSGGSRATSHQETKQ  
MQRGRGVSSSLKRHSEEPASDSGSKIQRQNNN

>Chanos\_chano\_XP\_030647938.1

MTHSSIHWFRKGLRLHDNPALIAALRDCKQLYPVYILDPWYSNNTNIGVNRWRFLLGALKDLDRSLKKLN SRL  
FVVS GKPTEVFLKLF EKWKITRLTFEIDTEPYSQCRDEEVQKLAKDHGVEIIKEVSHTLYNLERI IDENKGKA  
PLTYKRFQTI VSAIGPPRKVPVPPPTQQDMQGVNTPYSEKDDKKYGIPTLDEL CQDADFAGPENFP GGGEQ EALR  
RLDKHLERTGWVCSFEKPQTSPNSLTPTTTTVLSPYLSFGCLSARTFWWGLSDVYQ GKHSQPPVSLHGQLLWR  
EFFYTAGLGIPNFDKMEGN GVCVQVNWDNNPEYLA AWREARTGFPFIDAIMTQLRQEGWIHHLARHAVACFLT  
RGDLWVSWEEGKKVFEELLLDADWALNAANWQWLSASAFFQQYFRVYSPVAFGKKT DKN GDYIKKYLPLL RKF  
PAEYIYEPWKAPRSIQERAGCIVGKDYPRPIVQHETISKKNIQRMKEAYAKRSPDPAVSPEKEKGKKRKAGSV  
LDMLTKKTKK

>Chanos\_cha\_XP\_030625371.1\_cry\_DASH

MSSSRTIICLLRNDLRLHDNEVFYWAQRNADHIVPLYCFDPRHYVGTHCFNFPRTGPFRLRFLLESVKDLRAT  
LKKRGSTLVVRH GKPEEIVSDLIKQLGT VSAVTFHEEVTSEERIEKKVKDVCTQSKIRVQTFWGSTLYHRDD  
LPFNHIGGLPDVYTQFRKAVEAQGRV RPIVPTPEQVKPVP PGLEEGAIP TYENLGQIEPLTDPRS AFPCQGGE  
SEALARLKH YFWDTDAVATYKETRNLGLVGVDYSTKFS PWLALGCVSPRYIYDQIKKYE AQRTANQSTYWVIFE  
LLWRDYFKFVA AKYGDRLFHLDGLQEKHVPWKTDMKLFNAWKEGRTGVPFVDANMRELALTGFMSNRGRQ NVA  
SFLT KDGLDWRMGA EWFEYLLVDH DVC SNYGNWLYSAGIGNDPREN RKFN MVKQGLDYDNNGDYVRQWVPEL  
QGIKGGDVHTPWALSSSALSHAQVSLNETY P SPVVMAP EWSRHVNKKPSGAVASGRGRKGPSHTPRQHKDRGI  
DFYFSKNKNF

>Chanos\_cha\_XP\_030631243.1\_photolyase

MAAEKVDRKRKRETTEMTGGKKQKLVS IHEGKREREAGWLEGEVAALRREAQGCRFDKKRLRFLSEAQKIKQG  
SDGVLYWMARDQ RVQDNWALIHAQQ LAMAENLPLHICFCLVPRYLDSTFRQYAFMLKGLQEVAKESVLDIQF  
HLLRGE PGDILPGFVKDQNF GAVVTD FNPLRVPLQWVENVKKGLQPDIPFMQVDAHN VVPCWEASGKLEYGAR  
TIRGKITKLLPKFLTEIPLVDKHPHTSKKTAEPVNWDEIFSSLEVDRSVGEVEWAKPGTAGGMATLESFIDVR  
LRHFATQRNNPN SAALSQ LSPWVHFGQISAQRVVKEVQ RSGKNASQSVASFTEELVVRRELADNFCFY NANYD  
NVKGAYEWAQKTLKD HAKDHRPYLYTREQLENAKTHDQLWNA AQRMVLEGKMHGFLRMYWAKKILEWTSSPE  
EGLSIAIYLNDRYSLD GCDPNGYV GCMWSICGIHDQGWKERSIFGKVRYMNYAGCTRKF DVAQFERRYATKKA

>Chanos\_cha\_XP\_030634406.1\_cry-1-like

MTHRTIHLFRKGLRLHDNP SLVAALLESSVAVYPVFVLDRAFVEGAMATGSLRWRFMLQSLEDLHRS LKARGSR  
LHVLQGSYQDVLRKLVKRWAITQLSFDTEVEPHYVQLDGELHILAQELGLTIHSCVAHTLYDIKR VVKANGGE  
PPLTYKKFLHILSLLGEPDKPAREITAQDFEKCRTPLDEEHEAEYRVPSLSELGIEVEYEV LWPGGESHALKR  
LEKHFESQGWVANFSKPR TIPNSLLPSTTGLSPYLSLGLSVRTFYHRLSKIYAQSKNHSLPPVSLQGQVLWR  
EFFYTVASATPNFTKMEGNPICLQIGWYEDPESLQKWRMAQTGFPWIDAIMTQLRKEGWIHHLARHAVACFLT  
RGDLWISWEEGMKVFE EYLLDADYSVNAGNMMWLSASAFFHQYTRIFCPVRFGRRTPD PGQYIRKYL PVLKNL  
PSKYIYEPWTAPEEVQLKAGCIIGKDYPLPMVDHVEVSQRNLTLMKQVRCEQESTAELTRDVADDPMEIGLKR  
DFQDDGLADGTGEHRVNGTTKRFSSEKDHQAQPCSWTTETPRLTEISGEVM

>Chanos\_cha\_XP\_030646307.1\_uncharacte

MSVAKDAKAVSQVRQMLRDLLLGREDPEGFFGLCLSVLGDNDTRTLFMDLIKPISSGHVQLHSQLSAIYHEYF  
SKGEDVEVELALALSLQEV SQEVKEQRS AKPPQVKSYAELAGGRWAWSVNGAGVQDRGSRGLEKQPTVTKWSL  
TDAEVQGPTTALT KGRNAELHLAEEGDDFIKEHDAGQSQKLKRSRRRRQRKNQEL SLLQSPSGSKPILLWLR  
DLRMWDNPALIGCLEMGAPIIPVFLWNAEEEGPGVTVAAGGASKYWLHQVLVCFNQSLEQRGSHLITQRAEP  
SSLEALLRLVAETGAGTVVATALYEPWLKERDEVVFRALERKGIHCQLFHSYCLRDPYSITTQGVLRGIGSV  
SHFMSCCQQNPGTGLGTPLDAPGALPVPSVWPQGCPLTALGLARMPRRKDGTVVDWAANIREAWDFSEDGAQA  
RLDAFLQDGVRYEKESECRADAPNTSSLSPYLHFGQLSARWLLWDARGARCRPPKFQRKLAWRDLAYWQLCLF  
PDLPWESLRPPYKALRWSSERAHLRAWQRGGTGYPLVDAAMRQLWLSGWMNNYMRHVVASFLIAYLHLWPQEG  
YRWFQDTLVDADVAIDAMMWQNGGMCGLDHWNFVMHPVDAALTCDPRGDYVRKWCPELAALPDDL IHKPWHCP  
ASMLRRAGVVLGGNYPERIVVDLEELRAQSLRDAAEVRRRFGEFVDCHSGCDLVPLPARLVQEALGSRAELVR  
SGTQFLLPVITRMEFKHQTS DPGTDNPYSAVLKGYVSRKRDETIAFLNERDFTASVMCESAQR RERQDRHQ R  
LLEGLPKAPPTTPRGRAR RTPARDPYSTVPGGVAVPRR

>Chara\_bra\_CBR\_g37632\_GBG83833.1

MEAAGGLGSSSLKILVLGTTGVGKSLVIDTLLGRKASKSSRRGRFQLQEFQQA VSGRQLHVLEASGMSKPGDLE  
EVRRQLIKRQLAVDVIIYVDRAGVPDSSSLNLLQLAGDKFGGGMWGVTLFALTYSGALEPEVVVPDQDLIAD  
WTAGMERALRGEERKHVLSLPEVVS LRVGGGNDLFEVDRASIFGAVERVVRNGSVFVPDSQDRRASRRSSGLI  
ELGNLMDNNVRAERILLSGRRQESARPQPKPALREDGGAALHGGKKKERDVCVEESGGCVEQQNAGRPLEEH  
RMLAARPQIAAAASLSLALQAATMAVTPLVSKSLAELSAGGRGRQSSSVSPATANKQPSIALYRQSRQEEEGG  
ALAQ SAGEEVSKTRGASALMASLAPVQAPAMVLGVP SGAQSKVLPAPAKKASSGAALGAAAAGLNLSVTAGMT  
SGSSTDRSRAGRLSAFPDFQRLPSTGRGSTDPKGAPGARKASLVWFRNDLRVHDNEALLKANNESLSILCVYC  
FDP RDY G K S S S G F D K T G P Y R A K F L L E C V A D L R K N L R A K G N D L V V R I G K P E E V I G K L A R E V G A E A V Y A H Q E V T H  
E E L E M E E R V A A T L K E E G I E T K Y S W G S T L Y H L E D L P F K L E D M P S N Y G G F R E K V Q N L R V R A T A Q A P D S L R P L P A R  
G G V K V G E I P T L Q E L G L N V G S T G N S R Q D R K G A G A Q F E L I G G E T E A M S R L K T F V A E A N G R R K A S A N G E K L Y G A N F  
S C K I S P W L A M G C L S P R K M Y E D L K N T K G A A A R G I S S D G A W S T D E S N G L N W L V F E L L W R D F F R F I T K K Y G S H R K D  
Q E L S P A M A S S G A A L A C A

>Chara\_bra\_GBG67780.1\_CBR\_g905

MANQGN D V T P T S V E D L N R V R E S V E R C Y D E G V C P D D A Y L G E V V E D R E G K R F E V N K M V D E V K E Q W L R E R S V V V T F  
Q G E A R N L Q R S V K E D L I R A Y E D G W T A K K L F Q P G L R R G R V K F E G A N V A S Y V A K A K E I A D W L V Q Q K E M S I K L A N K V  
Y S V S F K P R L S R Q E L Q D A R I Q E A E S K F W I M A L R V P L D A Y Y F L R S A V P G V S E W V S D H M A K W E A A K P H F G S T A E W L  
D G G I A I T S G I L D A V S R I L A R E R N I K E A D F K R R V K E A E E R M E G H P I S V M V W A A E R E K R L E E W D N F Q V E K Q R W W T  
E L L Q D K G I E T H D K M T K E T F Q K L L P S R S Q H Q M V E L K H P F N E S A P T A C S S T G M L Q Y A R L Y Y E D V L S T R R P Q D D V D  
S D L S T S S D M W D N T G V R L S T T A R L D L D R P L T L E E V T Q M L K T M A R G K S P G V D G L T V E F Y I T N W G A F G E S L V K L Y N  
K V T T G G K L G K G M T H G V I S V L F K K G D K A R G R V I A R R R Q A E V I T A D R R R G C A E I S S S Q A V T M A A G A L A T R H V T S R  
A S V V A A S A K G A A L D T N R R R G E G T S I V W F R N D L R V H D N E A L L R A W Q D S D A I L P V F C F D P R L F K K T F S F G L P K T G  
E I R A Q F L L E S V E D L Q R T L E S Q G S V L V V R H G K P E D I I P G I V R A S G A H T V Y G Q K E T C S E E L Y V E R K M S E A L K S L Q  
T A T S G K R N E R G V K L Q L F W G S T L Y H L D D L P F R S S H V P D V Y T Q F R K S V E S S C R V R L S L K M P T S L G P K I A A D V I D A  
I G G K G M L P S F Q E L G Y S Q K R Q L D P R A V L Q F R G G E T V A L A R L E D Y F W K K D K L R V Y K E T R N G M L G A D Y S T K F S P W L  
A F G C L S P R F I H D E L I W R D Y F R F L T I K Y G N N I F K L G G P R N V A G K Q L W N R S T S L F D A W K E G R T G Y P L V D A N M R E L  
S S T G F M S N R G R Q I V C S F F V R D M G M D W R M G A E W F E T C L L D Y D P A S N Y G N W T Y G A G V G N D P R E D R Y F S I P K Q S A T  
Y D P D G E Y V A H W I P E L A Q V P M P K R H A P Y R L S T E E Q L Q Y G V R I G E G G D Y P E P I V P L K F G D G G G S R P V N G P R P R S A  
P G R G N F R A R P A G R S M S S Y L Q R G N D

>Chara\_bra\_GBG70219.1\_CBR\_g6351

M D S S G G G P S C T V V W L R R D L R L E D N P A L I W A A R A G A V V P V F I W S P E E E G Q F Y P G R V S R W W I K Q S L K H L N N A L Q V  
L G S R L I M R R S R D S L S A L L E I V E A L G A K Q V F Y N H L Y D P V S L V R D H R V K Q G L V Q H G I V V Q S F N A D L L Y E P W E V Y D  
E E G Q A F T T F Q K F W D K C I L M A F E P D P M L P P K Q L Y G P G E D L G G P T E E Q L G L E D Q A E M A S N L L L S R A W T P G W G H A  
D K A L D S F I R G P L I E Y A D S R A K A D S A T T S L L S P H M H F G E I S V R K I F H E V Q K M H F K W K R E G V M Q G V S S V E L F L R S  
L G F R E Y S R Y L S F N F P F T H E R S L L A N L K W F P W R V D E R M F K A W R Q G R T G Y P L V D A G M R E L W A T G W L H N R I R V V V S  
S F F V K V L Q L P W R W G M K Y F W D T L L D A D L E C D V L G W Q Y I S G S L P D G H E L D R M E N P E V E G M K Y D P D G E Y V R R W L P E  
L V R L P T E W I H H P W D A P P E V L R A A G I E L G V N Y Q L P I V D M G E A R Q K L Q E A L S E M W A R E N D N N C M R A A G N T E E G Y G  
E T M I V V E G S G R R A T E N M V V E R V I V A R Q K A Q K S S S M F K D Q L V P D M V T E S T K K A A S I L A P A A Y P A S E V E T R S E  
Q E G Q E A Q P M L Q E D A A S S G T G L R L E D T S G H A A G V E V E V Q V R E A A G G A A A Q H G S Q G R E D V M S T A E S Y T S P S S D R G  
G M A T V P V W S Q S G S S S R S P S L A V D G R V P T V P V V P D V R K G I G S G G R S R R R M Q P R Q G V G R V G L P K P Q G D E D K P L A K  
R K R K K Q T D P A N A D

>Chara\_bra\_GBG74222.1\_CBR\_g17934

M I P A C S P R S S E W R R L C G T D Q T V G I A I S V G E N Y R Q L L P L R L G Y Q D K W R L H V F P Q R F S R W Q K V S S C C Q I G H V A A S  
L S H R G R R S G G G G G G G G G G D R S W R N Q R S T R L L A P H P V F C C C R S F N Y T C P I N E V F H E L I S Y N G T S E W N S T K P R L  
N R R C R L P D R C M P R H R C M P R D R C M Q R T R S V S L W Q S Y C V V Q Q L P L I G G L C I G R P L S D T W Q R L R G V P L I T S S S A S S  
L F F S L T S S P S P R L I E A R E A M K R S A T E K G G G G E G S G R G G E E N E A P S L K K T K L S V A E E T S K A N T A T P S G K N A T S S  
G K N A T S S A K N A T S S A K N A T S A S R K S A G S S P A K K P S S A A A T S A A K T A A A D V A S S D V A A G A T N Q T P T S G R D E G R  
T K T K E G G G G G R R E V D D V R V N P K R V R V L K P K Q K P D V D K V V G A V D V N T G P V I Y W M S R D Q R S C D N W A L L H A W E  
E A R E R E V P L A V V F N L V P K F L G A G A R H F G F L L R G L K V V A G K L E E R K I P F F L F R G E A M D T I P A F V E E C H A S L L V M  
D F S P L R I G R K W R D T I C E K V S I P V H E V D A H N V P V W V A S E K L E Y G A R T I R T K I H K N L P E F L V P F P A L P D A P R P W  
S S P D K G G K L K L P Q V R P I D W D K L I E Q A L R I G A D V P E V D W C L P G E D N A I E W L M G E K S G F V T K R L A K Y D S M R N D P S  
K H G A L S G I S P W L H F G Q I S A Q R C A L E A K K A R K Q Y P Q A V D A F L E E L I V R R E L A D N Y C Y Y Q P K Y D S L A G A W D W A R Y  
S L Q Q H A A D K R E Y I Y T K E Q F E K G K T H D P L W N A A Q P L E M V H Y G K M H G F M R M Y W A K K I L E W T S S P E E A L S V A I Y L N D  
K Y E L D G R D P N G Y V G C M W S I A G I H D Q G W A E R P V F G K I R Y M N F N G C K R K F D V E A Y V Q F V N K L T S N V L K K K R E A A A  
G G A P A S A K G S D S A V K T A P S K G S G L A A K V A A K G

>Chara\_braunii\_GBG80215.1

M L K V G L E G G A I D E D V I E V D D N T D F E E V A E D V I H G G L K C G R G I G G G D E G G P L E E G V R S E I G V M A V G H F G V P P A S  
G T V E E S A A G D G E P L D D K D V V E G E V G F V G C V T M V G V V V D V G G V D D V L A E R T V D V D G K G S G A D V V W G E V V V T T V  
M A G L F P S I A T T R L E M V E M E V F M S V M E V F T R E M D D W R D C M I W S R A A K S G A A G V A A G G F S A G P S V Q V L V Q S V Y S Q  
P P L Q V A V T G Q P T V S Q P A Q P Q G T Q P Q Q Q P V Q Q P A P Q G P Q P G V A Q V P G Q S Q W V P K T V I A A P K P F T G D K R G E H L D M

WLRAPVYVKCTLTLPHEEV LVAASYLEGS AARWLSGLVQLQGYVHDFRAWAAHQKLEDF LKMVEDRWHD PQE  
AQKATDVILT LHTRQFKSGREATDAVERLICVPGVRYDPQVLLTSYPRCFPIPLRNQLAGEANINMHHPSPFS  
KKALDLEAIGHGQTPTTDGRKKS LPPNWKAKGRIMFVDNDGSTIELDNEFQAGVGSEAGSLEASGGGVVVVVA  
QKGVVEREVVHTIEIILGSSIPNGRIYQTSVELDELRRQLKELVEKGWIRLSVSPYGPSVLFVPKKEGT LRM  
CIDYRGLNAITVKNREPLPRIGDLLDRVQGC RYLSKID LKSGYHQIAIRPEDQHKTTFQTRYGLYEFVVMFPFG  
LCNAPGTFQHTMNQIFHDYLDKFVIVYLDDILIH DYLDKFVIVYLDDILIFSR TVEEHVHLDKVL SLLRQHK  
FKINGEXCEFG RTRVLYLGHEISVEGLKPNDAKVASIRDWPRPRSVIEMRSFLGMTGY YCNFVQNY SIVAAPL  
PDLTRLDTPWEWTRDCEAAFKQLKHALTHHEVLKLSDLDPKPCVVTTDASQY GIGAVLAQQEGKKLR LVEYMSK  
TMPSQKLAKSTY GKELYAIYKAL THWRHYLHGS AVADCSPTLAAQAKQLEERINH VVASLGDISKFAGASIVS  
NQLQMLSDRVQQRPTAVAK EWKMSNFKIEKFDDYHKTGPLQWMMTFNVEADVHHTPPLRRLDALYLQLIGGAQ  
AFMTHMVATLECTIATLHTKITWEEFEKKWKTRFMVNNDKRHALNKIFRI FQGQQTSREWLT EWQRLVATPEL  
NLPFDSIRAEFFAQSCHTLTAALGSELQYQTFDEMISKARELIQVPLPSTDGGVAVVDLRSYLVKIDREHVTQ  
RYVDIDTPFLYIHIQIGKAICSALIDCGASRNDFSQDFMACAGLGPRVRRRSQPTHVLLANGHTQKSIDRWEF  
FYTNGYGNVNFD RMVGNPICKQIPWHQND E L F VAWRDAKTGYPWIDAVMVQLQKWGMHHLARHCVACFLTRG  
DLFLHWEKGRDVFDRLLIDSDWSINNGNWLWLSASAFFSQYHRIYSPITFPKKYDPSGKFVRHFLPVLKDMPS  
QYIYEPWTSPIDVQKKAKCIIGKDYPRPVVDHAEASKLCRQMAAAYQANRDVTDPGVSGNRLPKPSSNARKA  
SSSTATKRKRE

>Charadrius\_voci\_\_KGL88511.1

RFL LQSLEDLDN S L R K L N S R L F V V R G Q P T D V F P R L F K E W G V T R L T F E Y D S E P F G K E R D A A I V K L A K E A G V E V V  
IENSHTLYDLDR I I E L N G H K P P L T Y K R F Q A I I S R M E L P K K P V S T I M S Q Q M E T C K V D I Q E N H D D V Y G V P S L E E L  
GFPTDGLAPAVWQGGETEALARLDKHLERKAWVANYERPRMNANSL LASPTGLSPYLRFGCLSCRLFY YRLWE  
LYKKVKRNSTPPLSLYGQLLWREFFYTAATNNPKFDRMEGNPICIQIPWDRNPEALAKWAEGKTGF PWIDAIM  
TQLRQEGWIHHLARHAVACFLTRGDLWISWESGVRVFDELLDADFSVNAGSWMWLSCSAFFQ QFFHCYCPVG  
FGRRTDPSGDYVKRYLPKLKGFP SRYIYEPWNA PESVQKAACCIIGVDY PKPMVNHAETSRLNIERMKQIYQQ  
LSRYRGLCLLASVPSCVEDLSGPVADSASGQGCSTSTAMRLSQADQASPKRKHEGAEELCAEELYKRAKV TGL  
PAPEIPGKS

>Charadrius\_voci\_\_XP\_009879608.1

MQHRTIHLFRKGLRLHDNPTLLAALESSEAVYPIYILDRKFLTSMHLGALRWHFLLQSLEDLQKNLCQLGSC  
LLVIQGEYERVL RDHIQKWNITQVTLDAEMEPFYKEMEANIRRLGEE LGFEVLSLVGHSLYD TKRILDNNGGT  
PPLTYKRFLHILSL LGDPEVPVRNLTAEDFQRCRPPDPGLAECYRVPLPV DLEI PLES LSPWRGGETEGLQRL  
EQHLTDQGWVTSFTKPTIPNSLLPSTTGLSPYFSTGCLSVRTFFYRLSNIYAQAKHHS LPPVSLQGQLLWRE  
FFYTVASATPNFTKMAGNPICLQINWYEDAERLHKWKTAQTGF PWIDAIMTQLRQEGWIHHLARHAVACFLTR  
GDLWISWEEGMKVFEELLLDADYSINAGNMMWLSASAFFHQYTRIFC PVRFGKRTDPEGQYIRKYL PVLKNFP  
SKYIYEPWTASRXXXXXEEEQKQAGCIIGRDY PFPMVNHKEASDRNLQLMKRVREEQYGTALTRDDTD D P M E  
MKVKRRHSEENVSKGKVARMTEKKEVPSGISPQEPKNGERGEPEAS

>Charadrius\_voci\_\_XP\_009880290.1

MLLED RFL L Q C L E D L D A N L R K L N S R L F V I R G Q P A D V F P R L F K E W N I A K L S I E Y D S E P F G K E R D A A I K K L A S E A  
GVEVIVRISHTLYDLDKI IELNGGQPPLTYKR FQTLISRMEPLEMPVETITPEVMEKCTTPVSDDHDEKYGVP  
SLEELGFDTDGLPSAVWPGGETEALTRLERHLERKAWVANFERPRMNANSL LASPTGLSPYLRFGCLSCRLFY  
FKLTDLYKKVKNSSPPLSLYGQLLWREFFYTAATNNPRFDKMEGNPICVQIPWDKNPEALAKWAEGRTGF PW  
IDAIMTQLRQEGWIHHLARHAVACFLTRGDLWISWEEGMKVFEELLLDADWSVNAGSWMWLSCSSFFQ QFFHC  
YCPVGFGRRTPNGDYIRRYLPVLRGFPAKYIYDPWNA PESVQKAACCIIGVNY PKPMVNHAEASRLNIERMK  
QIYQQLSRYRGLGLLATVPSNPNGNGGMLMGYSPGESISGCGSTGGAQLGTGDGHTV VQPCALGDSHTGASG  
IQQQGYCQASSILHYAHGDNQQSHLLQAGRTALGTGISAGKRPNPEEETQSIGPKVQRQSTN

>Charadrius\_voci\_\_XP\_009881711.1

MRRGQGRKAEAAELPRVSRREEEEEALQEARRAAPS VREFKYNKKRVRLVAQGS DLKDDARCILYWMSRD  
QRVQDNWAFLYAQR LALQELPLHICFCLVPKFLDATIRHYGFMLRGLQEVAKECGELNIPFHLLLG YAKDVL  
PEFVVEHGVGGLVTD F C P L R L P R Q W V E D V R E R L P E D V P F A Q V D A H N I V P C W V A S P K Q E Y S A R T I R G K I H A Q L P  
EFLTEFPPIRHPYPPSCPAEPIAWEACYSS LQVDRTVKEVEWATPGTAAGLAVLQSFIAERLKSFGSHRNDP  
NKAALSNLSPWFHFGQVSTQRAILEVQKHRGKYKESVDAFVEEAVMRRELAENFCY YNENYDSVQ GAYDWAQT  
TLKLHAKDKRPF LYKLQELEQGTT HDPLWNAALQLMVREGKMHGFLRMYWAKKILEWTRSP E E A L Q F A I Y L N D  
RYELDGRDPNGYVGCLWSICGIHDQGWAEIRAIFGKIRYMNYAGCKRKF DVGQFERRYAPRALSQ

>Charadrius\_voci\_\_XP\_009888783.1

MIIALLRCGLRAHDNQVLHWAQSNAD FV I P L Y C F D P R H Y L G T H L Y G F P K T G P H R L R F L L E S V K D L R E T L K K K G  
STLVVRKGKPEDVVC D L I T Q L G S V S A V A F H E E A T Q E E L D V E K G L C Q V C S Q H G V K I Q T F W A S T L Y H R D D L P F R P  
IARLPDVYTHFRKVVESGVKVRPTLRMAEQLKPLAPGVEEGCIPTMEDLGQNDPVTDPRTAFCPSGGETQALM  
RLQYYFWDTNLVASYKETRNGLVGMDYSTKFAPWLALGCISPRYIYEQIQKYEKERAANQSTYVWLFELLWRD  
YFRFVALKYGKRIFSLRGLQSKEVPWKDLQLFDCWKDGKTGVPFVDANMRELAATGFMSNRGRQNVASFLTK  
DLGLDWRMGAEWFEYLLVDYDVCSNYGNWLYSAGIGNDPRDNRKFNMIKQGLDYDGSGDYVRLWPPELQGIKG

ADIHTPWALSSAALSQAGVTLGETYPQPLVTAPEWSRHINQRPVSTGKVRVGRGPAHTPMQHKDRGIDFYFSR  
KKDVR

>Charadrius\_voci\_\_XP\_009889134.1

MQHSSSIHWFRKGLRLHDNPALLAAATDCCRLHPLFILDPSNRRAGANARRFLLDALLDLDGSLREMGSRFLFVV  
RGCPQEVFPCLFRAWGTTRLTFEVDTEPPARQORDTAVAEELAAQHGVVEVIQKVSHTLYDTERVLALNGGKAPLT  
YKHLQSLTSLGPPEKPAPALTQEHLQGCHTPCQTSHTDIDYGVPTLEELGQNPAGMGPGLYPGGETAALARLD  
AHMERTAWVRGFKKPEPETEPTSLSPSTTVLSPYIKFGCLSVRTFWWRLDEVYQGREHSQPPVSLHGQLLWREFF  
YTAGASIPNFDPMVGNPICLQVDWDDNPQYLRAWREGQTYGPFIDAIMTQLRSEGWIHHLARHACFLTRGD  
LWVSWEEGLKVFEELLLDADWSLNAGNWLWLGSAAFFHRYFHVYSPVAFGKKTDRDGAYIRKYLPIKDFPAE  
YIYEPWKAPRAVQERAGCLVGTHYPRPIVEHRAASERNLGRMKAARAQKGTREPPAGPSVAESRRKKSKEAQ  
H

>Chauna\_torq\_\_NXK44152.1

RFLQSLLEDLDNSLRKLNLSRLFVVRGQPTDVPRLFKWGVTRLTFEYDSEPFGERDAAIVKLAKEAGVEVV  
IENSHTLYDLDRILNNGKPPITYKRFQAIISRMELPKKPVSSVTSQQMETCKVDIQENHDDVFGVPSLEEL  
GFPTDGLAPAVWQGGETEALARLDKHLERKAWVANERPRMNANSLASPTGLSPYLRFGCLSCRLFYRLWE  
LYKKVKRNSTPPLSLYGQLLWREFFYTAATNNPKFDRMEGNPICIQIPWDKNPEALAKWAEGKTGFPPWIDAIM  
TQLRQEGWIHHLARHACFLTRGDLWISWESGVRVDFELLLDADFSVNAGSWMWLSCSAFFQQFFHCYCPVG  
FGRRTDPSGDYVKRYLPKLGKGFPSRYIYEPWNAPESVQKAAKCIIGVDYKPMVNHAETSRLNIERMKQIYQQ  
LSRYRGLCLLASVPSCVEDLSGPAADSASGQGSSTSTAMRLPQSDQASPKRKHEGAEELCTEELYKRAKVTGL  
PAPEIPGKSL

>Chauna\_torq\_\_NXK48124.1

RFLQCLELDANLRKLNLSRLFVIRGQPADVPRLFKWNIAKLSIEYDSEPFGERDAAIKKLASEAGVEVI  
VRISHTLYDLDKIILNNGQPPITYKRFQTLISRMELPEMPVETITPEVMEKCTTPVSDDHDEKYGVPSLEEL  
GFDTDGLPSAVWPGGETEALTRLERHLERKAWVANFERPRMNANSLASPTGLSPYLRFGCLSCRLFYFKLTD  
LYKKVKKNSSPPLSLYGQLLWREFFYTAATNNPRFDKMEGNPICVQIPWDKNPEALAKWAEGRTGFPPWIDAIM  
TQLRQEGWIHHLARHACFLTRGDLWISWEEGMKVFEELLLDADWSVNAGSWMWLSCSSFFQQFFHCYCPVG  
FGRRTDPNGDYIRRYLPVLRGFPKYYIDPWNAPESIQAACCIIGVNYKPMVNHAESRLNIERMKQIYQQ  
LSRYRGLGLLATVPSPNPNNGNGGLMGFSPGESISGCGSTGGAQLGTGDGQTVGVQTCALGDSHTGGSGVQQQ  
GSYCQASSILHYAHGDNQQSHLLQAGRTSLGTGISAGKRNPEEETQSVGPKVQRQSTN

>Chauna\_torq\_\_NXK48987.1

KVDYDVCSSNYGNWLYSAGIGNDPRDNRKFNMIKQGLDYDNGDYIRLWVPELQGIAGADIHTPWALNSATLSQ  
AGVTLGETYPPPVVTAPEWSRHINQRPGRSPHPSGRRGPAPMQREHRGIDFYFSRNKDM

>Chauna\_torq\_\_NXK52963.1

DNWAFLYAQRLLALKQELPLHVCFLVPKFLDATIRHYSFMLKGLQEVGKECTELNIPFHLLLGAKDVLPTFV  
VEHGVGGLVTDFCPLRVPRQWVEDVRERLPEDVPFVQVDAHNIVPCWVTSAKQEYSARTIRGKIHSQLEFLT  
EFPPIIRHPPHPPSCPEAIAWDACYSSLQVDRTVTEVEWATPGTAAGLAVLQSFIDERLKSFSQQRNDPNKAA  
LSNLSPWFFHFGQVSTQRAILEVQKHRHMYKESVDAFVEEAVRRELADNFCYNNENYDSVRGAYDWAQTLEL  
HAKDKRPFLYELQOLEQATTHDPLWNAQLQMVREGKMHGFLRMWAKKILEWTRSPPEALRFAYLNDRYEL  
DGRDPNGYAGKLRSWGLWSICGIHQGWKERDVFVKIRYMNYAGCKRKFDDVQFERRYARRK

>Chauna\_torq\_\_NXK56767.1

MPHRTIHLFRKGLRLHDNPILLAALESSEVVYPVYILDRKFMTSMVHIGTLRWHFLLQSLLEDLQKKLCQLGSC  
LLVIQGEYESIVRDHVQKWNITQVTLDAEMEPFYKEMEANIRCLGEELGFEVLSLVGHSLYDTRKILDLNDGT  
PPLTYKRFLLHLSLLGDPEVPVRNLTAEDFQRCRPPDLGLAGCYRVPLPADLKIPPEISIPWRGGETEGLQRL  
EQHLTDQGWVASFAKPRTPVNSLLPSTTGLSPYFSMGCLSVRTFFYRLSNIYAQAKHSLPPVSLQGQLLWRE  
FFYTVASATPNFTKMAGNPICLQIRWYEDAERLHKWKTAQTGFPPWIDAIMTQLRQEGWIHHLARHAAACFLTR  
GDLWISWEEGMKVFEELLLDADYSINAGNWMWLSASAFFHQYTRIFCPVRFGKRTDPEGQYIRKYLPIKKNFP  
SKYIYEPWTASEEEQKQAGCIIGQDYPPFMDVHKEASDHNLQLMKQVREEQYRTAQLTRDDTDDPMEMKLKRD  
YSEENVTKAKAARMME

>Cheilinus\_undu\_\_XP\_041648513.1

MAHTCIHWFRKGLRLHDNPALVAALRDCKELFPVFILDPHLHNKTCYGINRWRFLIGALKDLDCSLRKLNSRL  
FVLRGNPEDVPKLFNQWKVTKLTYEYDTEPYSLSRDKTVTALAKDHGVEVIYKISHTLYDIERIIEENNGKT  
PLTYVRMQAIMKGLGAPKRPVPPTMEDMKDVKTPHFEKHERDYGLPTLEELGHNTTGLFEEKFPGGEQEALR  
RLDEHMQATKGWCSFEKQTSFNSLTPTSTTVLSPYVTFGCLSARTFWWRLTEVYQGGKHSPPVSLHGQLLWR  
EFFYTASVGIPNFKMEGNSVCTQVDWDTNPEYLAAWREARTGFPFIDAIMTQLRQEGWIHHLARHACFLTR  
RGDLWINWEEGQKVFEELLLDGWALNAGNWQWLSASTFFHQFFRVYSPVAFGKKTDKNGDYIKKYLPLLKKF  
PAAIYEPWKAPRSVQEAAGCIVGKDYPRPIVEHEVISKKNIQRMKSAYAKRSANPESPSKKQGVKRKQPSIA  
DVMKKKEKKK

>Cheilinus\_undu\_\_XP\_041651051.1

MVVNSVHWFRKGLRLHDNPALQAEALNGADTVRCVYILDPWFAGAANVGINRWRFLLEALEDLDNSLRKLNLSRL  
FVVRGQPTDVPRLKKEWKVTRLTFEYDPEPYGKERDGAIIKMAQEFGVETIVRNSHTLYNLDRILNENNSP

PLTFKRFQTIVSRLELPRRPLPPINQQQMDKCPTKISDNHDQLYSIPSLLEELGFRTEGLSPAIIWRGGESEALD  
RLNKHLDKKVWVANFEHPRPNMCSLYASPTGLSPYLRFGCLSCRVLYYNLRELYMKLRKRCSPPLSLFGQLLW  
REFFYTAATNNPNFDRMDGNPICVQIPWDQNPEALAKWAEGRGTGFPWIDAIMTQLRQEGWIHHLARHAVACFL  
TRGDLWLSWESGMKVFEELLLDADWSVNAGSWMWLSCSAFFQQQFFHCYCPVGFGRRTDPSGDYIRHYIPIIKD  
YPNRYIYEPWNAPEVQKAANCVVGVDPKPIINHAEVSRNLNIERMKQVYQQLSHYRGLSLLASVPTIQEEAE  
PPMTDESQTSSGPDSPPRGPADSEAAGCSTAPDSSTVCASSSYTPMHEDTADFKNQTPCTSSNTNPSAAITST  
STFMSTSLPPSTATPPSPAQSPLSRSKPSTPSSSCPSPSPSPATTPNQTPSSLGPKRKGPRKVRRSQRQR  
GRQCTAAAVREGERRSEEEEREAGEERMEEDVEQGEEKMEEETCGETARHQQ

>Cheilinus\_undu\_\_XP\_041651086.1

MVVNTIHWFRKGLRLHDNPSLRDSIRGADTLRCIYILDPWFAGSSNVGINRWRFLQLCLEDLDASLRKLNSRL  
FVIRGQPTDVFPRLLFKEWKITRLSYEYDSEPFGERDAAIQKLASEAKVEVIVRISHTLYDLARI IELNNGQP  
PLTYKRFQALITRMDAVELPAETITQQTIKNCATPIRDDHDDKFGVPTLEELGFETEGGLSTAVWPGGETEALI  
RLERHLERTAWVANFERPRMNANSLASPTGVTPYLRFGCLSCRLFYHKLTDLYRKVKRNDAPLLLLYSQLLW  
REFFYTTATNNPCFDKMEGNPVCVQIPWDRNPEALAKWAEQGTGFPWIDAIMTQLRQEGWIHPLARRSVVCFL  
TRGDLWVSWEEGMKVFEELLIDADWSVNAGSWMWLSCSSFFQQQFNCCCPVGFGRQMDPNGDYIRRYLPILRG  
FPARYIYDPWNAPEEVQKVEKCIIGVHYPKPMVNHAESRINIERMKQIYQQLSCYRGLGLLASVPANSSSNM  
RGVGAGTGPSSGRTSEKNPTQEGTRQTERGQTTLKRRREEAAPESSCKTMKQSK

>Cheilinus\_undu\_\_XP\_041651995.1

MPPSAGSDEDSKALVRKALREVLVGREDPEGFFAMCVSALGHQETRLHFLSIIQPLSTANISLHSILTSIYRE  
YFSKTEDDELEVALALSLEMRDHQLSAPSQESQLQQHLEHRIQKSSSQQISRSQSWGNSHTQHTNVAESREN  
TNLPKTGDLERNVQPKINLKGNPGKSLTMCAPVTSNSLREHGTAEGGGMMHEGDLDQPEKRKHSKNRRQRRK  
GACQRIVGLPTSPSARPPVLLWFRDLRLCDNPALNGSLEVGAIPVFIWSPKEEEGPGITVAMGGACKYWL  
HQALSCFCSSLERIGSHLVFLQAKGESKEVGSSLCCLKELKETGARTVLANALYEPWLKERDDEVVSALQKD  
GVEFKMFHSYCLRDYPYSVSTEGVGLRGIGSVSHFMSCKQNPGSALGVPLDPPVALPSPSHWPQGVSLDELGL  
ATMPRRKDGTIDWAANIRKSWDFSEEGAARLEGFLHDGVYRYEKESGRADAPNTSCLSPYIHFGQLSPRWL  
MWDAGARCRPPKFQORKLAWRDLAYWQLTLFPDLPWESLRPPYKVLWSNNHSHLKAQWRGRTGYPLVDAAMR  
QLWLTGWMNNYMRHVVASFLIAYLYLPWQEGYRWFQDTLVDADVAIDAMMWQNGGMCGLDHNWFVMHPVDAAM  
TCDPCGSYVRKWCPELSDLPDEVIHKPWKCPVSMRRAGVVFQGTYPERIVTDLEERNHSLQDVALVRREFG  
QYVDKRSGLDLVPLPPRLVSEALGLSHRDGGVVKEGKQFLPVITRMEFKHQLEDPDADAASNYPYNAVLRKGYV  
SRKRDETIAFLNERDFTASVMEGAQRKERLES DYRRMEGLPRLPAPRGKARRTTAKDRFSTVPGGAVTSLK

>Cheilinus\_undu\_\_XP\_041659813.1

MLKCILIRASSPFARRYFLRLHHSTERSIPIFFHQTKSFTSQTSMSSDKKRKAPAAAKEPSAKQQKLTMPKVE  
KAGGWLQDHLRQRTDNKDMKFNKKRLRFISETEKIKQGSEGLVYWMRLDQVRVDNWLIIHAQRLAVKENLPL  
HICFCLVVPKSELSTLRHFSFMLNGLREVAKKCKNLDIQFHLLHGSAGEVLPGFVSDHGLGAVVTDFSPLEQ  
LQWLEDVKKLPKDIPLIQVDTHNIVPCWVASPKLEYAARTIRGKITKLLPEFLTDFPLVEKHPHTAARTAKP  
IDWDKTLASLKVDRTVGETEWAKPGTKAGVAMLESFIDVRLKMFDTQRNDPNAPALSQLSPWIRFGHLSAQRV  
ALQVQHSGRKAGVTVTSFIEELVVRRELTDNFCFYNNKYDCVEGAYDWAQKTLKDHAQKRPYLYTREQLEKA  
KTHDKLWNAAQYQMVSEGKMHGFLRMYWAKKILEWTSSPEEALSIALYLNDRYELDGQDPNGFVGCMWSICGI  
HDQGWAERPPIFGKIRYMNYKGCLRKFDVARFERKYCPKDL

>Cheilinus\_undu\_\_XP\_041669776.1

MSASRTVICLLRNDLRLHDNELFHWAAQRNAEYIVPLYCFDPRHYVGTYTYNLPKTGPFRLRFLLEGIQDLRNT  
LVNKGSNLVVRRGKPEEVVADLIQLGSVSTVAFQEEVTSEELNVEKRVKDVCAQMKVKVHTCWGSTLYHRDD  
LPFPHMSRLPDVYTQFRKAVETQSRVRPLFPTPEQLKPLPQEELEGTIPTAEELQQTEPVNDPRSAFPCSGGE  
SQALARLKHYFWDTNAAVAYKETRNGLIGVDYSTKFAPWLAMGCISPRYIYHQIQQYERERTANQSTYWVIFE  
LLWRDYFKFVAAKFGNRLFQVEGLQDKSVPWKKDMKLFNAWKEGRTGVPPVDANMRELAMTGFMNSNRGRQNV  
SFLTCDLGLDWRMGAEWFEYLLIDYDVCSNYGNWLYSAGIGNDPRENRKFNMIKQGLDYDNNGDYVRQWVPEL  
QGIRGADIHTPWTLSAALSHAQVSLGETYPTPIVMAPEWSRHVNKKPSGPGSPRGKKGPSHTPKQHRDRGI  
DFYFSRSKNL

>Chelmon\_rost\_\_XP\_041794067.1

MVVNSVHWFRKGLRLHDNPALQEALNGADTVRCVYILDPWFAGAAANVGINRWRFLLEALEDLDSLLKKLNSRL  
FVVRGQPTDVFPRLLKEWKVTRLTFEYDPEPYGKERDGAIIKMAQEFGVETIVRNSHTLYNLDRI IEMNNNSP  
PLTFKRFQTIVSRLELPRRPLPPVTQQQMDKCCHTKIADNHDQLYSIPSLLEELGFRTEGLPPAIWQGGESEALD  
RLNKHLDKKVWVANFEHPRVNMCSLYASPTGLSPYLRFGCLSCRVLYYNLRELYMKLRKRCSPPLSLFGQLLW  
REFFYTAATNNPNFDRMEGNPICVQIPWDQNPEALAKWAEGRGTGFPWIDAIMTQLRQEGWIHHLARHAVACFL  
TRGDLWISWESGMKVFEELLLDADWSVNAGSWMWLSCSAFFQQQFFHCYCPVGFGRRTDPSGDYIRRYIPIIKD  
YPNRYIYEPWNAPEVQRAANCVVGVDPKPMINHAEGSRNLNIERMKQVYQQLSHYRGLSLLASVPTIQEEAE  
PPMTDESQTSSGPDSPPRGPADIEAAGCSTAPDSSTVCASSYTPPHPDLEEAADNYPSQTPCTSLHSCTHPSA  
AITSTSTSHPPSTATPPSPAQSPLSRSKPPSPSSSCPSTLSPSPGPATPMTQTSSLGQRRKGLARKVRRRIQRQR  
GRQCTCTPASREGDRRSEEEEEEREAVGEERMEEDVEQEEERMEETSEETAGHQQ

>Chelmon\_rost\_\_XP\_041794469.1

MPPSAAAGAEDSKALVRKLLREVLVGREDPEGFFVKCVSALGHQETRSQFLSLIEPLSTANSSLHSTLTISIYM  
EYFSKTEDDELELALALSLEMKDHQMSAPSQESSLQHPGGDRPNQRSSIQLAPVSPQESNHSQADVADRR  
KNINSPQGGPWVKVSPQTRETRELQKSAHVYKYNKETPGTSQTVCVSRLSGSISKQDTVEEGDQMMDEGDVN  
PSEKPKHKNRRQRKAGQVVGGLPCSPSAPPPVLLWFRDLRLCDNPALTGSLEFNAPVIPVFIWSPPEEEE  
GPGITVAMGGACKYWLHQALSCFSSLERIGSHLVFLKANGEGNEVGSSQRALKELVKETGARTVLANALYEP  
WLKERDDAVVSALQKDGVECRMFSYCLRDPYSVSTEGVGLRGIGSVSHFMSCCRQNPGSALGVPLDPPVSLP  
TPAHWPQGISLDTLGLARMPRRKDGTIDWAANIRKSWDFSEEGAHARLEAFLRDGVYRYEKESGRADAPNTS  
CVSPYLHFGQLSPRWLLWDAKGARCRPPKFQQRKLAWRDLAYWQLTLFPELPWESLRPPYKALRWSSHRGHLKA  
WQGRGTGYPLVDAAMRQLWL TGWMNNYMRHVVASFLIAYLYLPWQEGYRWFQDTLVDADVAIDAMMWQNGGMS  
GLDHNWFVMHPVDAAMTCDPHGTYVRKWCPELADLPDELIHKPWKCPASMLRRAGVVFGQTYPERIVTDLEER  
RSHSLQDVALVRKEFGQYVDKRS GCDLVPLPPRLVSEALGLSHRDGGVVTAGKQFLLPVITRMEFKHQLEDPD  
ADATSNPYNALVKGYVSRKRDETI AFLNERDFTASVMYEGTQRRERLES DYRRMEGLPRPPAPRGRPRRTPTA  
KDRFSIVPGGAITS LR

>Chelmon\_rost\_\_XP\_041799864.1

MAHTCVHWFRLRLHDNPALMAALRDCKELYPVFILDPHLHNNSCVGINRWRFLIGALKDLDCSLRKLNSRL  
FVVRGKPEDVFPKLFNEWKVTKLTYEYDTEPYSVSRDKTVTALAKEHGVVEVIYKISHTLYDIDRIEDNNGKA  
PLTYNRMQAIKTLGPPKRPI PAPT MEDMKDVKTPISENHEKKYGIPTLEELGRDTAALVEEQFPGGEQEALR  
RLDEHMKRTAWVCSFEKPQTS PNLSPSTTVLSPYVTFGCLSARTFWWRLTDVYRGKKHSDPPVSLHGQLLWR  
EFFYTASVGIPHFNMEGNSVCTQVDWDTNPEYLAAREARTGFPFIDAIMTQLRQEGWIHHLARHAVACFLT  
RGDLWISWEEGQKVFEELLLDGDWALNAGNWQWLSASAFFHQFFRVYSPVAFGKKTDKHGDYIKKYLPLKKF  
PAEYIYEPWKAPHSVQQAAGCIVGKDYPHPIVQHEVISKKNIQRMKLAYAKRSADPAASPSKKQGVKRKTPSV  
VDMLNKKERKK

>Chelmon\_rost\_\_XP\_041804411.1

MLHCIWRSSSSCSLARFPRLVARSTRRPTSVFCCRIKPFTGEAIMSEKKRKATSAAATKEPSAKQLKVAAAK  
EQGWLEDMVQQORSEKKEMKFNKKRLRFISDTEKMKQGSEGVLYWMSRDHRVQDNWALVHAQRLAVKENLPLH  
VCVCLLVPKSELSTLRHYSFMLKGLEEVAKKCKSLNIQFHLLRGSAGDVI PGFVSDRSLGAVVTD FSPLREPL  
QWLEDVKKL PKDIPLIQVDAHNIVPCWVASPKLEYAARTIRGKITKLLPEFLTDFPPVEKHYPYTATRTAKPV  
DWDETLASLQVDRTVGEPEWAKPGTKAGMAMLESFIDVRLKLFDSQRNDPNAAALSQ LSPWIRFGHLSAQ RVA  
LQVQRSGKSTGQPVASFIEELVVRRELTDNFCFYNNKYDSVEGAYEWAQKTLKDHA KDRPYLYTREQLEKAK  
THDKLWNGAQYQMVSEGKMHGFLRMYWAKKILEWTSSPEEALSIALYLNDRYELDGQDPNGFVGCMWSICGIH  
DQGWAERP IFGKIRYMNKYGCLRKFDVARFERKYCPKNL

>Chelmon\_rost\_\_XP\_041817076.1

MSTSRIICLLRNDLRLHDNELFHWAQRNAEYIVPLYCFDPRHYVGTYNLDLPKTGPFRLRFLLESIRDLRNT  
LLNKGSNLVVRGKPEEVVADLIKQLGSVSTVAFHEEVTSEELNVEKRVKDVCAQM KVKVHTCWGSTLYHRDD  
LPFNHISRLPDVYTQFRKAVETQSRVRPVFPTPEQLKPLPQGLEEGA IPTAEDLQQTEPVT DPRSAPFCSGGE  
SQALARLKHYFWD TDAVATYKETRNGLIGVDYSTKFAPWLAMGCISPKYIYHQIKQYERERTANQSTYWVIFE  
LLWRDYFKFVAVKYGNRLFQVKGLQDKSIPWKKDTKLFNSWKEGRTGVFPVDANMRELAMTGFMSNRGRQ NVA  
SFLT KDGLDWRMGAEFEC LLIDHDVCSNYGNWLYSAGVGNDPRENRKFNMIKQGLDYDSNGDYVRRWVPEL  
QGIKGADVHTPWALSTAALSHAQVSLGETYPTPIVTAPEWSRHVNKKASGTGPS PRGKKGPSHTPKQHRDRGI  
DFYFSRSKNL

>Chelmon\_rost\_\_XP\_041819920.1

MVINTIHWFRKGLRLHDNP SLKESLLGADTVRCVYILDPWFAGSSNVGINRWRFLQLSLEDLDSSLRKLNSRL  
FVIRGQPTDVFPRLFKEWNISRLSYEYDSEPF GKERDAAIKKLACEAGVEVTVRISHTLYDLDKI IELNGGQS  
PLTYKRQFTLISRMDAVEGPAESVTADVMGKCTTPLSEDHDDKFGVPSLEELGFDTEGLSSAVWPGGETEALT  
RLERHLERKAWVANFERPRMNASSLLASPTGLSPYLRFGCLSCRLFYFKLTDLYRKVKKNSSPPLSLYGQLLW  
REFFYTAATNNPCFDKMESNPICVQIPWDRNPEALAKWAEGR TGFPWIDAIMTQLRQEGWIHHLARHAVACFL  
TRGDLWIGWEEGMKVFEELLLDADWSVNAGSMMWLS CSSFFQQFFHCYCPVGFGRRTPNGDYIRRYLPILRG  
FPAKYIYDPWNAPENVQKAAKCIIGVHYPKPMVHHAESRLNIERMKQIYQQLSCYRGLGLLATVPSTSNGNR  
NGNSETGFPVEASQDAAAPSGYQMPVHSQEDWQSGVMMYMQGDPQTSISTHQQGYAGTNSNVMCYTQGTQQIP  
G PALQKGPEHHSTTQTSSKRHSEDSGNGKCSKVQRVQSSH

>Chelonia\_mydas\_\_XP\_037738454.1

MKHISIHWFRLRLHDNPALLAAMTDC HLYPIFILDPWF PKNM RVSVNRWRFLVESLRDLDES LQKLNSRL  
FVVRGHPTEIFPVLFKEWKVTRLTFEIDTEPYSRQRDSEVVRLAADHGVQVIQKVSNTLYDTRVIAENNGKV  
PLTYVRLQTLAALGPPKRVPVAPTLENLKDCTPCKDNHDSEYGIPTLEELGQDPEQAGPRLYPGGESEALC  
RLDLHMNR TAWVCNFQKPQTEPNLSLSPSTTVLSPYIKFGCLSVRTFWWRLSEIYQGRKHSSPPVSLHGQLLWR  
EFFYTAGAGIPNFNMEGNPVCVQVDWDDNPEHLRAWSEGR TGYPFIDAIMTQLRTEGWIHHLARHAVACFLT  
RGDLWISWEEGQKVFEELLLDADWSLNAGNWQWLSASAFFHQFFRVYSPVAFGKKTDKGGEYIKKYLPLCRKF  
PAEYIYEPWKAPRSMQEQAGCVIGRDY PKPIVVHEVVSKRNVERMKAAAYARRSASTTAQLEGGGGKKGARRKT  
PAGPSVAELLTKPKTKSS

>Chelonia\_mydas\_\_XP\_037747093.1

MSGAGPRTVICLLRHDLRFHDNEVLHWAQNNADYIIIPLYCFDPRQYLRTYYYYGFPKTGPHRLKFLLESVKDLR  
QTLKKKGSNLVVRKGNPEDVVHDLITQLGTVAAVAFHEEATKEELDVEKALQRVCAQHGVKIQTFWASTLYHR  
DDLFFSHISRLPDVYTQFRKAVEAQAKVRPTVQMAQDLKPLAPGVEDGCI PAPEEFGQKDPLTDPRTAFPCSG  
GETQALMRLQHYFWDNLVASYKETRNLIGIDYSTKFAPWLALGCISPRYIYEQIRKYEKERTANQSTYWVI  
FELLWRDYFRFVALKYGTRIFLLKGLQDKEVPWKDKPKLLDAWKEGRTGVPFVDANMRELAATGFMSNRGRQN  
VASFLTKDLGLDWRMGAWEFYEYLLVDYDVCSNYGNWLYSAGIGNDPRENKRFNMIKQGLDYDSNGDYVRLWVP  
EIQCVKGGEIHTLWALSNAALSEAGIALGETYPLPVVLAREWSRHIKQRPNKRDHPPRGRKDPSTPRQHKDR  
GVDFYFSRNKDLS

>Chelonia\_mydas\_XP\_037756053.2\_LOW\_QUALIT

MTGYVGGAPEAARARGGAGVGWRSRAAEMAAAGSSPLGLARSVHWFRRLRLHDNPALQAALRDASSVRCIY  
ILDPWFFAASSAVGINRWRFLQLSLEDLNSLRKLGSCLEFVVRGQPTDVFPRLFKEWGVTRLTFEYDSEFPFGKE  
RDAAIKLAKEAGVEVVIENSHTLYDLDRIIELNGHKPPLTYKRFQTIISRMELPKKPVNSITSQQMEKCKSE  
IQENHDDTYGVPSLEELGFPTDGLAPAVWKGGETEALARLDKHLERKAWVANYERPRMNANSLASPTGLSPY  
LRFGCLSCRLFFYRLWELYKKVKRNNTPPLSLYGQLLWREFFYTAATNNPKFDRMEGNPICIQIPWRNPEAL  
AKWAEKGTGFPWIDAIMTQLKQEGWIHHLARHAVACFLTTRGDLWISWESGVRVDFDELLLDADFSVNAGSWMWL  
SCSAFFQQFFHCYCPVGFGRRTDPSGDYVRRYLPKLKGFPSRYIYEPWNAPESVQKAAKCIIGVDYPKPMVNH  
AETSRLNIERMKQIYQQLSRYRGLCLLASVPSCVEDLSSPVTDTTSGQGSSTSTVQRL LHCGQTSPKRKHEGV  
EELCTEELYKRAKVMGLHISEIPSKNL

>Chelonia\_myd\_EMP41017.1\_cry-1

MPHRTIHLFRKGLRLHDNPNTLLAALESSEVVYPVYILDRKFLMSAMNMGTLRWHFLLQSLEDLQRLNLTCLGSC  
LLVIQGEYESVLDRVKKWNITQVTLDAEIEPFYKEMERTIQALGGEMGFVLSLMGHTLYDIRRILDMNGGT  
PPLTYKRFLHILSVLGDPMFVRNLTAEDFQRCPPPELCLAEDDRVPPLPEDLDIPRESQSPWRGGETEGLQR  
LEQHLKNQGWIANFTKPRTPINSLLPSTTGLSPYFSLGCLSVRRFFYRLSNIYAQSKNHSPPVSLQGQLLWR  
EFFYTVASATPNFTRMAGNPICLQINWYQDAERLYKWRMAQTGFPWIDAIMTQLHQEGWIHHLARHAVACFLT  
RGDLWISWEEGMKVFEEMLLDADYSINAGNWMWLSASAFFHQYTRIFCPVRFGKRTDPEGQYIRKYL PVL TNF  
PSKYIYEPWTAPEEAQKQAGCIIGQDYPLPMVNHEASDRNLQLMKQVREEQYGTACLTRDDMDDPMEMGLKH  
ELSEENPKKGKRARNTQNT

>Chelonia\_myd\_XP\_037736147.1\_cry-1

MGVNAVHWFRLKGLRLHDNPALRECIQGADSVRCVYILDPWFAGSSNVGINRWRFLQLQCLEDLDANLRKLNSRL  
FVIRGQPADVFPRLFKEWNIAKLSIEYDSEFPFGKERDAAIKKLASEAGVEVIVRISHTLYDLDKIIELNGGQP  
PLTYKRFQTLISRMELPEMPVETITAEMEKCTSPVSDHDEKYGVPSLEELGFDTDGLPSAVWPGETEAL  
RLERHLERKAWVANFERPRMNANSLASPTGLSPYLRFGCLSCRLFYFKLTDLYKKVKKNSSPPLSLYGQLLW  
REFFYTAATNNPRFDKMEGNPICVQIPWRNPEALAKWAEGRGTGFPWIDAIMTQLRQEGWIHHLARHAVACFL  
TRGDLWISWEEGMKVFEELLLDADWSVNAGSWMWLSCSSFFQFFHCYCPVGFGRRTDPNGDYIRRYLPILRG  
FPAKYIYDPWNAPESIQKAAKCVIGVHYPKPMVNHAEEASRLNIERMKQIYQQLSRYRGLGLLATVPSNPNGNG  
NGGLMGYSYPGENISGCSSAGGAQLGSTDGHTVGVTCALED SHAGSSGIQOHGYSQGS SILHYAHGDHQQSHL  
LQQGRGTGSTSISTGKRPNPEKETQSIGPKVQRQSTN

>Chelonia\_myd\_XP\_037765512.1\_photolyase

MSQKSRNRRÄHGGE DTTAS PAGSGDTARTRAAVPRGQLKGKRKVLAEPSGA EALTVAKRRRKEGEAAEGGGA  
GSLGEAVRQARLRVAPSVQEFYRNKKRVRLVSESSDLKDAAGVVYWM SRDQRVQDNWAFLYAQR LALKQQLP  
LHVCFCFLVPKFLEATIRHFSFMLKGLQEVAKECQELDIPFHLLIGFAKDVLPAFVTDHGLGGVVTDFSPLRVP  
MQWVEDVKERLPGDVFPVQVDAHNIVPCWVTS DKQEYGARTIRRKIHDRLPEFLTEFPPIKHFPPTAPAE P  
IDWSACRASLQVDCSVKEVRWATPGTAAGLAMLESF IGERLKFFGTDRNNPTKAALSNLSPWFHFGQVSVQRA  
ILEVQKHSRQYKESVDGFIIEAVVRRELADNFCFYNRNYDKVEGAYDWAKTT LKLHAQDKRSHLYELKQLEEG  
KTHDPLWNA AQLQMVHEGKMHGFLRMYWAKKILEWTRSP EEALKFAIYLNDRYELDGRDPNGYVGLLAGSWGP  
VKRCRRVQET

>Chiloscyllium\_plag\_XP\_043558343.1

MSKNGKQTDNRNAKDSEHEKKIEEKSNNKETAFSSSSNSLKTSTKKSTKKRNHNNS SREDS PKLQAKGKRTVEE  
RPPGLIERKLSNSRINKKRKTEHQAETSLSGEGLNLLKSINKSRLATAKSV EEFNFNEKRIRLLSKTESVRENS  
WGIIYWMSRDQRVQDNWAFLYAQR IALKHKLPLHVCFCFLVPKF LDATIRHFGFMLKGLQEVAEECKQLNISFH  
LLIGFAKDVLPEFVKGNHNIIGIVTDFSPRLRPLEWIEDVRHNL PENLPIIQVDAHNIVPCWVTS DKQEYSART  
IRKKIHDKLPQFLTD FPPVIQHPFSSSLKQLLIDWDAAAANLEVDRTVKEVDWAKSGTAAGLIRMESFIKEQL  
QHFASTDRNNPNKTALSNMSPWFHFGQVSVQRTILEIKKYRNKFKDSDVDSYIEEAVVRRELADNFCFYNKQYDK  
IEGASDWAHKT LKMHSKDQRQYLYTLKELEDGRTHDSLWNA AQLQMIHEGKMHGFLRMYWAKKILEWTTSP EE  
ALRFSIYLNDRYELDGRDPNGYVGC MWISICGIHDQGWKERPVFGKIRYMN YNGCKRKF DIGQFERKYSYN

>Chiloscyllium\_plag\_XP\_043565791.1

MGGHSIHWFRKGLRLHDNPALLEALVGS D TIRCVYIVDPWFAGSSSVGINRWRFLQLQCLEDLDANLRKLNSRL  
FVVRGQPADVFPRLFKEWNISRLTFEYDSEFPFSKERDAAIKKLAI EAGVEVIVRISHTLYDLDMI IQHNGGQP  
PLTYKH FQTLISRMESIEIPVETITAEDMGKCTTPVFDHDDKYGVPSLEELGFDT EGLSSAVWPGETEAL A  
RLERHLERKAWVANFERPRMNSTSLASPTGLSPYLRFGCLSCRLFYFKLTDLYKKVKKNSTPPLSLYGQLLW

REFFYAAATNNPRFDKMEGNSICVQVPWDRNPEALAKWAEGRGTGFPWIDAIMTQLRQEGWIHHLARHAVACFL  
TRGDLWISWEEGMKVFEELLLDADWSVNAGSWMWLSCSSFFQQFFHCYCPVGFGRRTPNGDYIRRYLPVLRG  
FPAKHIYDPWNAPECVQAAKCIIGVHYPKPMVNHAESRLNIERMKQIYQQFSRYRGLGLLASVPSNPNTSA  
GPMEYSQGGSTHGCSSITTGKSFLVSSRSSGKRPSLGEGIPRVEPQSQRQNNND

>Chiloscyllium\_pun\_GCC23239.1\_chiPu\_0001

MIDARAKLKGECKSTAIEGQQRLRLAAQSRLLSITCRSFCHRLCVIYCPQPSGCVSLQCAKQRNNMSKNGKQT  
DRNAEDSEHKKKIEEKSNNKETAFSSSSNSLKTSTKKSTKKPNHNNSSREDSPKLQAKGKRTVEERPPGLTEG  
KLSNSRINKKRKTEHQAETSPSGEENLLKSINKSRLATAKSVEEFNFNKRIRLLSKTESVRENSWGIIYWMS  
RDQRIQDNWAFLYAQRLALKHKLPLHVCFLVPKFLDATIRHFGFMLKGLQEIAEECKQLNVSFHLLIGFAKD  
VLPEFVKGHNIGGIVTDFSPRLPLEWIEDVRHNLPENLPIQVDAHNIVPCWVTSQKQEYSARTIRKKIHDK  
LPQFLTDFFPVIQHPFSSSLKAQLIDWDAANLEVDRTVKEVDWAKPGTAAGLIRMEAFIKEQLQHFTSDRN  
NPNKTASSNMSPWFHFGQVSVQRTVLEIKKYRNKFKDSVDSYIEEAVVRRELADNFCFYNKQYDKIEGASDWA  
QKTLKMHSKDQRQYLYTLKELEDGRTHDSLWNAQLQMIHEGKMHGFLRMYWAKKILEWTTSPPEALQFSIYL  
NDRYELDGRDPNGYVGCMWSICGIHDQGWKERPVFGKIRYMNYNGCKRKFDIGQFERKYSYN

>Chiloscyllium\_pun\_GCC37125.1\_chiPu\_0015

METHSIHWFRKGLRLHDNPALKEALRGASTVRCVYILDWPWFAGSSNVGVNRWRFLQCLEDLDTSLAELNSRL  
FVIRGQPADVFPRLFKENINRLTFEYDSEFPFKERDAAIKKLASEAGVEVIVKISHTLYDLDKIIELNNGQP  
PLTYKRFQTLISQMDPPEPPVETISERSLGKSTILVLDHNEKHGVPSSLEELGFDTEGLPSAVWPGGETEALT  
RLERHLERKAWVANFERPRMNALSMLASPTGLSPYLRFGCLSCRLFYFKLTLEYKNIKKTDSPLSLYGQLLW  
REFFYTAATNNPCFDKMEGNPICVRIPWDKNPVSLAKWAEKGTGYPWIDAIMTQLRQEGWIHHLARHAVACFL  
TRGDLWISWEEGMKVFEELLLDADWSVNAGSWMWLSCSSFFQQFFHCYCPVGFGRRTDLNGDYVRRYLPILKG  
FPAKYIYDPWNA PNSVQVAAKCIIGIHYPKPMVIHAEASRLNIERMKQIYQQLSRYRGLGLLASVPSNQNGSG  
GTVYCLGDQITENNGIVQAHTSGGMVGKRELERDTAVSDDMESLAQKVRRCDDNNEDEQNLLNVSY

>Chilo\_sup\_AHL69753.1\_cry\_2

MSAAAQTLPSSTAARTHGPAALAPTSPSKCNPTGKHTVHWFRKGLRLHDNPALREGLNNAVTFRCVFIIDPWFA  
SSSNVGINKWRFLQCLEDLDCSLRRLNSRLFVVRGQPADALPKLFREWGTTTELTFEEDPEPYGRVRDHNIMS  
KCREIGINVSRVSHTLYKLDKIERNNGKAPLTYHQFQALIASMPPPPPAEAAISAQGFGNATTPIADDHDD  
RFGVPTLEELGFDTEGLKPPVWIGGESEALTRLERHLERKAWVASFGRPKMTPQSLFASQTGLSPYLRFGCLS  
TRLFFYYQLTELYKRIKRVQPPSLHGQILWREFFYCAATRNPNFDRMEGNPICVQIPWQKNQEALAKWANGQT  
GYPWIDAIMIQLREEGWIIHHLARHAVACFLTRGDLWISWEEGMKVFEELLLDADWSVNAGMWMWLSCSSFFQQ  
FFHCYCPVRFGRKTDPNNGDFIRRYIPALKNMPTRYIHEPWLAPEAVQQSARCIVGRHYPLPMVDHTKASQINI  
ERIKQVYAQLAQYKPLAILNPHTLQRPNMVQPSPTSILTNIQSNFLCSQNSDAQIISTVQNSTTKSSNVF  
QHFGANNNSRNDTKQSQSKPVVIIQRENSANVQKIDYGRANPCPSPRPQONYIINGQDVPHKSKEDTERAQS  
KQEENYNLKIFDINKFIQDYSNNQKTYPNQERKTEDVYQQDEKSISYGFTKPKFYMSYPNNGIVRNEHSHIET  
QEDEPTTRNHEYAGESTKETKKEKQIHNNCIQ

>Chilo\_sup\_CDK02014.2\_cry\_1

MLGGSVLWFRHGLRLHDNPALLSALEDRRMPLFPFIIFDGETAGTKLVGYNRMRYLLEALDDLNDNQFKKFGG  
LIMLKGPNIIVFKRLWEEFGIRKLCFEQDCEPVWRARDDSVKDACEIGVQCREHVSHTLWEPDVTIRANGGI  
PPLTYQMFLHTVDTIGDPPRPVVDADLCGVKFGALPECFYQEFTVFDKTPKPEELGVFLENEDIRMIRWVGGE  
TAALKQMQRRLNVEYETFCRGSYLPHTGNPDLLGPPISLSPALRFGCLSVRRFYWSVQDLFQKVHQGRLSSTH  
YITGQLIWREYFYTMSVNNPNYGMAGNPICLDIPWKSPEGDELQRWKEGRTGFPFVDAAMRQLLLEGWLHHV  
VRNTVASFLTRGSLWLSWEHGLQHFLKYLLDADWSVCAGNWMWVSSSAFEALLDSGDCACPVRLGQRLDPSGE  
YVRRYLPALARVPDRYIYEPWKAPIEVQEQANCIIGKDYAPAMVNLVAEAERNRFAMKDLREMLQKAPPHCCP  
SSEEEIRQFMWLNDEPAIALSTT

>Chilo\_sup\_QCH40574.1\_CRY1\_X1

MANKASVVHWFRLDLRIHDNLALRNAINEAENRQYYLRPVFIIDPDIKERVGVNRLRFLFQSLQDLDSNLRLK  
NSRLFILKGTADLFSKLFQWQVKYLTSQLIDPEIVKQDEIVDRLAEEKGIFIVRRVQHTVYDFHSVLKKN  
NGSVPLTYQKFLSLVKDIKVKETIETITKTLSDYCKPPDSTCEEYNVPSLNDLIGIDESSLKSCYHGGETEGLK  
RLNLYMEKKNWVCKFEKPNTSPNSIEPSTTVLSPYLSHGCLSSKLFYHRLKGVENGVAHSQPPVSLLGQLMWR  
EFYYTAGAGTENFDKMVGNAVCTQIPWGKNDKYLKAWSEGMTGYPFVDAIMRQLKQEGWIHHLARHMVACFLT  
RGDLWISWEEGARVFEDYLLDYDWSLNAGNWMWLASAAFFYKYFRVYSPVAFGKKTDEGLFIRKYVPELKKY  
PTEYIYEPWKAPKSVQRTAGCVVGEQYQIRIVDHDKIHKENMQMAAAYKVNKEKKSRLKRKL

>Chilo\_sup\_RVE51139.1\_evm\_004282

MVAGEFVKAESTNLPRI DALMVGFEV ALNPDFCSAEQRNDKASIMASAAKPKLSISSSSAKEETD TLTSFMQK  
IQKKREETAESILQYKFNKKRLRIVSQEQMVADKCEGIVYWMSRDSRVQDNWALLFAQKLALKNEVPLHVCFC  
LIAKYLDASVRQFHFLIKGLEKVAADCKKLNITFHLLLEGSGAEALPQWVVDHKGIVAVCDFNPLRVPLGWLED  
CKKKLKKDVPLIQVDAHNIVPCWEASNKQEYSARTIRNKINSKLGEYLTEFPPIKHPYTSKFEPIDWDQA  
IESREADKSVGPVDWAKPGYDEAVKMLKSFIDKRLKIFSSKRNDPTQDACSNSLSPWFHFGQISVQRVALCVQE  
YKSKHTESVNAFLEEAIVRRELADNFCFYCEHYDSLKGASAWAKTLDHRKDKRTHVYSLEQLSKAETHDDL

WNSAQLQLVKEGKMHGFLRMWCKKILEWSPTPEDALKYSIYLNDHYSVDGRDPNGYVGCMWSICGIHDQGWA  
ERAVFGKIRFMNYDGCKRKFNVNFAVARYGGKIHKNNTSKK  
>Chionoecetes\_opi\_KAG0711927.1\_cry\_DASH  
MKFGDRVFYPSGIMGKNIQWKDLHLFQKWKGVYLASFRTLSHHLARSHTAHSYLQLSEGRGTGVFPVDANMRE  
LLETGWMSNRGRQNVASFLIKMDGLDWRLGAWEFESQLAFPYRMGRHPAQSSLPTNT  
>Chionoecetes\_opi\_KAG0725286.1\_photolyase  
MLSKADEVPDCDGVVYWMSRDQRVQDNWAMLFAQRLALKYKVS LHVVFCLVPKFLDATIRHYQFMLKGLEEVE  
SECRELSISFHLHPGEPLAVLPEFIKSHNIGGLVTDFSPRLRLPLWVKEVKKAI PQNIPMCQVDAHNIVPCKK  
ASEKQEYSARTIRKKIHDKLPDFTLTKFPPIKHPHESKGENEAVDWAAAEEETLEVDMKVKAWEVAVPGTQAGL  
NTLDAFCLKRLRKYDKQRNDPNANALS NLS PWLHFGQISAQRCVLEV KRYKKQLKESVDNFIEETVVRRELGD  
NYCYYQENYDRLEGAYQWAIITLNDHKKDPRPYLSLETQLQEATHDELWNSAQIQLVKEGKIHGFMRMWAK  
KILEWTASPETALETAIYLNDRYSLDGRDPNGYVGCMWSICGIHDQGWGERAVFGKIRYMNYDGCKRKFKIDG  
YVARYGGKKHKYVPPSK  
>Chionoecetes\_opi\_KAG0726473.1\_cry-1  
MLNLGVFSQKRLAMKHGMKV TGYNRQH YLMGALS DLDQLREHGSQ LFMCKGSPVDVFTTLHKEMGVTHLSFE  
QDCEAIWNRDDDEVKMCSELGITMMERIAHTLWDPFEI IEANGGQPPTTYEMFVQVAGALGLPHQPSPDPDW  
QDVTFGELPDEVAQKIKLCPQVPSPEEQGWTRNGECPVYSGGEKAALAHRLRERLIVEDKAFR  
>Chionoecetes\_opi\_KAG0727244.1\_cry-1  
MTGDLIKPRPKHHVHVHFRKGLRLHDNP SLRAGLKNAATFRCIFILDPWFAGSSNVGINKWRFLLSLEDLDT  
SLRKLNSRLFVIRGQPAHVLP ELFWEDTTCLTFEKDPEPFGKVRDANIVAIAREMGIN VIVKTSHTL FKPEK  
IIDKNGGKPLTYKSFQNI LMTMDLPQLPLSTITLGDLENKCTPLTDDHDDKYGVPTLEELGFDTESLQQTGW  
KGGESEALTRLEHHLERKAWVASFGRPKMTPQSLYPSHTGLSPYLRFGCLSCRRFFKELNELYKKIRKSPPL  
SLHGQLLWREFYYTAATNPKFDHMEGNPICVQIPWDKNPEALAKWANGQTGYPVWDAIMTQLRNEGWIHNVA  
RHAVACFLTRGDLWVSWEEGMKVFDELLLDADWSVNAGSWMWLS CSSSFFQQFFHCYCPVRYGRKADPNGDYIR  
TYLPVLKNFPTKYLHQPWTAPE SVQRAARCVIGRDYPLPMVDHIKQSQNNIERMKQVYQQLAHYRGKINPAIK  
SPTMDHYSPPPPDFDKKRSSKTGKTDIHRDSGYRVHGQTCLKLTTGDHEC  
>Chionoecetes\_opi\_KAG0728005.1\_cry-1  
MTTVHWFVRKGLRLHDNPALLAALKEGAELRPVFVLD PWFVKNARVGVNRWRFLSQTLEDLDACLRLKLSRQVV  
QLFVVRGSPPEEVFPVL FKKWNVKRITWEIDTEPYARVRDEKVERLARESGVEVVC RVGHTLYRTEKI IDANMG  
KTPLTYQSLQKLVGKLGHP RPPLDTLTSLPDSCHLHGDAATDISFEPPSLKELGVDESQLEPCLYPGGETEAL  
VRLERYMERKSWCKFEKPKTSPNSLQ PSTTVLSPYLKFGCLSPRTMYHQLLQVYKGSTHTQPPVSLMGQLLW  
REFFYTVGATT PNFDRMEGNPVC RQIPWERDQKLMDAWTNAKTGYPFIDAIMTQLRKEGWIHHLARHAVACFL  
TRGDLWQPWEDGMKVFEELLLDADWSL NAGNMMWLSASAFFNSYFRVYSPVAFGKNTDKYGEYIRKHL PQLAK  
YPENIYIEPWKAPLGVQRAAGCVIGQDYPRPIVDHSIIMKRNMERMGKAYKAAKEKKAASDSQSSPRKKMKK  
>Chlamydomonas\_rei\_12g534550v5\_XP\_042918714.1  
MDSHGPLPLAALSLHALGAPAGLGASRHAARPTKAAPPPVSARDGVRSHPI NAALATSDSSSASSGAADSAPA  
QRPGPHALQRLVSAVPAALARLV TGPFHQPAFNGPASLSDMRVFPAPVPKRAAPGGGGRPAGGAARKAALVWF  
RNDLRLHDNPAL EQACRQSSSVLPVYVFDPRDYGKTPSGFDRGTGPGRARFLLEAVADLRQRLRDAGSDLVVR  
GRPEAVLKELAAAVGAGAVYQCQSEVTAEEMQVEGRVRAALDRESCELRPQWGGTLFHLEDLPFRLDAMPTSYA  
DFRERVANLKVRLSESDGGIKGLPAGNSVEPGDIPTLQRLGFSPAAATAGAAA PGSGLGAPLQLGGGPALVL  
RGGESEALRHMQAFIDELRRAVSGAAAAASGSGKPGAAPPSATFSCRISPWLALGCLSPRRMYHEMRQQLAPA  
GAPVIRSSSSSAIGSGSAAAPLSGPAKQGGAAGGAGSPANWLVFELLWRDFFRFVTQKHSAGARLAAAKSAA  
RSGRSAAAAPVAPAMAAALA  
>Chlamydomonas\_rei\_AAD39433.1\_class\_II\_D  
MSSKRKATEAPAAGEDGAAGPSSKKQAAASASAAAAAAGAGSAAAGGALVNPKRVRVLKPGSIGKGPVYVWMS  
RDQRLADNWALLHAIEAAQGAAGSSQVAVAFNLVPAFLGAGARQFGFMLRGLRQLAPRLEARGIKFYLLKGD  
AHTLPQLVSGLGAGLLVTDYSPRLRLGRTWRDQVCSALGSVPVHEVDAHNVPVWAAASEKREVGARTLRPKIHK  
ALPEFLREFPEVPTLP AWT PAVAPEAVDWDGLI SEVLSRGADVPEVEWCTPGEEAALEALTGPRGFLSPARLS  
LYDTRNDPATPSALSGLSPYLHFGQLAPQRAALEAAKHRAKYKAAVESYLEELVVRRELADNFCHYCPTYDS  
LEAAAEWARDSLDKHRTDKREFLYTRDQLECGATHDELWNAAQLEMVHVGMHGFMRMYWAKKILEWTQGPEQ  
AIEWAIYLNDRYELDGRDPGGYTGVLWSMAGVHDMGWAERAVFGKIRYMNYNGCKRKFDIKAYVAYVSKAVAE  
AKAKGRAAKLPSAAAAGASGAAAAGATAAAAAAAGPSPGAQAAKAAKAKAEKPKEAKPKAAKAAAKAKGPKDE  
KAAAAGAKRKAAPKASASSGEEGSDDE  
>Chlamydomonas\_rei\_XP\_001698054.1\_cry\_photor  
MAGVKNSIIWFRKGLRLHDNPALLEACKDAKHVYPVFVLD PHFLQSSYKVS VNRYN FLLESLEDLQRSFQAR  
GSRLLVLRGKPEEVFP RVFREWGTQLCFEHDTEPYAKVRDAAVRRLAAEAGVEVVTPI SHTLYD TDMLVARN  
GGAAPLTMQSFTKLVD RVGDP PAPAPDPPAAMP PPAEDMP SAAPAATGVPTWQEVGFKEPPLTVFKGGETEAL  
ARLEAAAFQDPKWVAGFQKPDTPSAWEKPATTVLSPYLKFGCLSARLFHARLLEVYRRHPAHSQPPVSLRGQL  
LWREFFYTVGSTTPNFHRMAGNPVCKQIDWDDNPEFLAAWREARTGFPWIDAIMTQLVTWGMHHLARHSVAC  
FLTRGDLYVSWERGMEVFEEHLIDQDHYLNAANMMWLSASAFFS QYFRVYSPVVF GKKYDPEGRFIRKFLPVL

```
>Chlamydomonas rei XP_001701553.1 cry_phtor
```

>Chlamydomonas rei XP\_001701871.1 cry DASH1,

>Chlamydotis macq KFP36953.1

>Chlamydotis\_macq\_KFP42943.1

>Chlamydotis macq XP 010113633.1

>Chlamydotis macq XP 010116266.1

>Chlamydotis macq XP 010117280.1

VLHWAQSHADFVIPLYCFDPQHLYLGTCHCYGFPKTGPPRQKESVKDLRETLKKKGSTLVVRKGKPEDVVRDLIT  
QLGVSVAFAFHEEATQEELDVEKGLCQVCSQHGVKIQTFWGSTLYHRDDLPRPIARLPDVYTHFRKAVESEA  
KVRSTLRMADQLKLAPGVEEGCIPTMEDLGQKDLVTDPRATFPCSGGETQALMRLQYYFWDNTNLVASYKETR  
NGLVGM DYSTKFAPWLALGCISPRYIYEQIQKYEKERTANQSTYVWLFELLWRDYFRFVALKYGKRIFSLRGL  
QSKEVPWKDLQLFDCWKEGKTGIPFVDANMRELAATGFMSNRGRQNVASFLTKDLGLDWRMGAEWFEYLLVD  
YDVCSNYGNWLYSAGIGNDPRDNRKFNMIKQGLDYGNGDYVRLWVPELQGIKGADIHTPWALNRAALAQAGV  
TLGETYPQPVVTAPEWSRHISQKPQGRSPHPRGRREPAHTPAQHKDRGVDFYFHHKDVHTLEKP  
>Chlamys\_isl\_AYE92098.1\_cry\_1,\_par  
LRIHDNPALCDALENCDEFYPIFIFDGEVAGTKFSGFNMRFLHESLEDLDNTFKKNEGRLYTFQGNKDVVK  
GLFQEWNVTRLTYEAEVEPIWEERDLEVEELCREKGIQLISRISHTLWNPSDIIDNNGGTPPVTYNHFEITTS  
LVGSPDRPVVPKLSKVNMPVSDNFDKKFALPSVKELGYEPECKEQTERINNWLGGGETKALQLEERLKNERE  
PITDGIMLPNLVPE  
>Chlamys\_isl\_AYE92099.1\_cry\_2,\_par  
YRCVYVLDPWFAQASQVGINKWRFLQCLEDLDCSLRKLNSRLFVVRGQPTNVFPLLFKEWNITTLSFEEDPE  
PFGKERDAAIKALAMEAGVETIVRTSHTLYDLQKIINQNGMSPLTYKRFQMILSKMDPPKQPEETINAAAYLG  
KCRTPLSDEHDEHYGVPTLEELGFDTEGLKPAELRGGEALSRLEHLEKAWVASFEKPKMTAQSLFPSQT  
ALSPYLRFGCLAPRLFYWKLAELFRKVKKQSEPPLSLHGQLLWREFFYTAATNNPNFDRMKDNPICVKVPWDH  
NPEGLAKWAEGMTGYPWIDAIMRQLKQTGWIHHLARHAVACFLTRGDLWISWEEGMKVFEDELLDADWSVNAG  
MWWMLSCSSFFQQFFHCYCPVSFGKRADPTGDFIRSYPVELKNYPSKYIFEPWNAPPSVQKAACVVGKDYPL  
PIIDHGDASKVN  
>Chloracidobacterium\_the\_WP\_058868137.1\_DNA\_photol  
MTKRILCWFRDLRLDDNTALLAAAYAAAEVVPVFI FDDAILSRPDTGAVRVAFLLESRLNLDENLRARGSQL  
LLRRGRPEQVLAQLVTETAASAVYFNRDVEPFALVRDARVQAHLEGRCAVEAFDDSSGLTAPDAIRTKAGTPYT  
VFTPYKQAVLAQPVPHPRPAPAMLRTPANVPSPDPWPSLKD LGFATSVSPPPGETPAQARLQDFIQNGLARYA  
TERDVLSADGTSRLSPYLRFGCLSPRRAYWAAREAVPEGAPGAETWIAELIWRDFYRQILFHFPYVETGAFRR  
AYDDLAWENNASWFDLWCQGKTGFPIVDAAMRQLLTGWMHNRARMIVASFLTKDLLIDWRWGERHFMKHLVD  
GDLAANNNGGWQWAASTGTDAQPYFRIFNPTAQGKKFDPTGAYVRQYVPELRAVPDRWIHEPAQMPVEVQRAFR  
CVIGVDYPAPMVDHSRQRAKALTMFGRFASPEKRPGR  
>Chlorella\_sor\_PRW45175.1\_photolyase  
MAALAAAGFCTTARIAACRGLRSSATQVRVRARWVVVQVRMSSGGGGSSGGGGGNRAVLWFRGTDLRVHDNVV  
VHEAARRVQAGQVSEVLPLYCFDPRFFSASAWGNPKTGAFRAQFLLESVLDLKRQLRVLGS DLVIAMGRPEEV  
LPGLMTERGSGGRTTVIAQSEVTSEETRVERKVKSAVAAAGGKLELWVGSTMFHLDDLPRFREDLSDLPDVFTP  
FKQKCEDRSKVRACLPTPKRGALPLGGIPADLLAFEPQ RVEDLNAVVPAGHPQLATTPLDARGVLD FKGGES  
AALARLNYYLFESHRIA EYFDTRNGMLGGDYSTKFAPWLAHGCLSPRTIYHEIKRYESQTGTANKSTYWVIFE  
LIWRDFFRFFALKHGNKIFFEGGVTDAQPWSHDAEAFRRWKEGRTGWPLVDANMRELAATGFMSNRGRQNV  
SFLALDLGLDWRWGADWFESLLLDYDVCSNWNWVAAAGLTGGRVNKFNITKQSN DYDPQGDYIRTWVPELKG  
VPARRIHEPWLM SREEQAAAGVQIGVDYPSPIKSSWKGYGGGGGGGRPSSSGGYRQGGGGGSGGGWQGGRG  
GSGQGGGRGGGAGGRSGRGPKPRSAFELYG  
>Chlorella\_sor\_PRW58644.1\_blue-light  
MPAPPPTSMEVEGSLRPHAALPEVPLPEGGLRRVIVWFRRDLRLADNPALVAALRMAPEVLPVYI WVPPEEG  
QFQPGRC SRWLLAASLKALDADLRALGSRL LAYRSPDSRALLCRLARELGAGAVLFNHLYDPI SMVRDNEVKA  
GLAAGVHCQS FNAEILREPWEVLAPGGKPFCTFDGFWGAHCGLPYPPPPPLPLPAALPLPRGIEATELAQL  
GIMTPEEEMSNAQLE FHWQPGSAGAHRLLD FVRGGRLKAFDHDRAKTDRQSTSR LSPHVHYGEISARHIYYV  
AKHAELEWARGGGGGGTSVADFLRQLGYREYSRYLSFHFPFTHERSLLEHLRAVPWRFDQRLFKAWRQGR TG  
PLVDAAMRELWGTGWMHNRMRVVAASFLVKNLLLPWQWGLKHYWDALLDADLES DALGWQYVAGCMADAHEFS  
Y MIDQPT EAKRFDPDGRYVRRWLPVLARLP AKWIHQ PWLAPESVLADAGVELGVNYPWPVMEVEESAALKAA  
DAVVQACLVRGGEAGAGGEVAAPPPAGPFRPATDAEP AEAEERLFMENYRHSVMAGSALPPIVDRAEGLGESED  
VSSNVVLGANA AAAAFAFSSAPAATTITGALSAAPAAARQAAAAAAAAAQQQQQAQTQEVQQPQRVPEQSQQV  
AQQPQQQAQAI VSMAGWRQLQTTPIGGSLPAAGSGPPGSGDGTGHATATGLHSTGVGVPSLPLSGGGES PQG  
QVPQGM RPPLPHHAAQQVVEAAAHKQALLRRAANEGQQGSNSPASGRMDEGEQQAQWPPELTLEPQQGHKRQ  
RQASPPPPG  
>Chlorella\_sor\_PRW58875.1\_UVR3\_3-lik  
MRFATLALAALLAACVPRPAHAASGDASYIGEVMMATSF CPTGSVEANGATVAAASNPSLYALLGTTYGGT  
STNFKLPNIK PQSSALAAEVGGSGGAMGATSIIWFRKGLRIHDNPALLAAAGADHLCPLFILD PWFLQPD  
KIGVNRVQFLLES LADLDASFRARGSRLLVLRGKPQEVLP PVFKEWGVTRLCFESDTEPYAKQRDAAVRQLAE  
AAGVEVHSSVSHTLYDPQLLLARNGGKPLTMQAF TKLADAVGPPPAADPPEKLPPLAPQAASLDAAASGV  
PSLADIGYPPAGTTPFKGGETAALARMADYLSDKDWVCAFEKPKGNPALFLRPATTVLSPYLKFGCLSPRLFH  
AKLQQIY SERSGKHTQPPVSLRGQLLWREFFTL CGSAVNFDRMEGNPICRQIPWADDPARIQAW EESRTGY P  
WIDAIMAQLRRQGWMHHLARHSVACFLTRGDLWCSWEAGQAVFDKYLIDADWSLNAANWQWLSASAFFS QYFR

VYSPISFGKQYDKNGDYIRHFLPALKDMPAKYIYEPWTAPLSVQQAAGCIIGKDYPRIVDHAVVHKENMAKM  
KAAVDAGKAAAGAAAGAGGAAAGSAAAAAAGGDGASSSGSKAGAKPAKRARKS

>Chlorella\_sor\_PRW61485.1\_CPD\_photol

MARVYSKAYRSDEPAMTSLARVYADANVNNPKEYWDYENLQIDWGSQDDYEVVRKVGRGKYSEVFEGVNVNRNN  
EKCIKILKPKVKKKKIKREIKILQONLYGGPNVIKLLDVVRDPQSKTPSLVFEYVNNNTDFKVLYPTLSDYDIRY  
YVMEILKALDFCHSKGIMHRDVKPHNIMIDHSQRKRLRIDWGLAEFYHPGREYNVRVASRYFKGPELLVDLQD  
YDYSLDMWSLGCMLAGMIFRKEPFFYGHNDYDQLVKICKVLGTDSFYSYLNKYGLELDPQLEALVGRHSRKPW  
TKFVNAENQHLVSAEAIDFIDKLLRYDHQERLTAKEAMAHPYLAPALAVHRPWAAAAPAEALRRGLQQRTRR  
SLAAAATPAAAAAMGADDDKRKAEEGLEGGPAKKVAAAKLAVHPRKRVRELRRKGAVEGSGPVIYWMSRDQVRDN  
WALLYAAEAAAARGVPVAVAFNLVTEFLGAGARQFGFMVRGLQELQPKLEALNIPFFLLKGDPDTETLPQLVQD  
TGASLLVTDFTPRLRGRQWKEGVAAKVEVPFHEVDAHNIIVPVWVASDKREYAARTIRPKIHSKLPEFLQEFPE  
LPEQPAWTGAKPEPVDWEALLQEVLERGKDVPEVAVACKPGEDAALAEALKGEKGFLLTKTRLSRYDEKRNDDPTVP  
DALSGLSPLYLHFGQLAPQRAAIEAAKCKSMHKASVEGFLEELIVRRELSDNICYFYVDNYDSLGAAYDWARQTL  
EAHRSDKREHLYTKEQFERGQTHDKLWNAQLEMVHSGMKMHGFMRYWAKKILEWTASPEEALEVAIWLNDKS  
LEVAIWLNDKYQLDGRDPNGYVGCWWSIAGIHDQGWAEARAVFGKIRYMNNGCKRKFIDIKYVARIGAMVRDV  
KAAAAAQ

>Chlorocebus\_saba\_XP\_007998737.1

MAATVATAAAVAPAPAGTDGASSVHWFRKGLRLHDNPALLAAVRGARCVRVYILDPWFFAASSSVGINRWR  
LLQSLEDLDTSLRKLNSRLFVVRGQPADVFPRLFKEWGVTRLTFEYDSEPFGERDAAIMKMAKEAGVEVVTE  
NSHTLYDLERIIELNGQKPLTYKRFQAIISRMELPKKPVGLVTSQQMESCRAEIQENHDETYGVPSLEELGF  
PTEGLGPAVWQGGETEALARLDKHLERKAWVANYERPRMNANSLLASPTGLSPYLRFGLSCRLFYRLWDLY  
KKVKRNSTPPLSLFGQLLWREFFYTAATNNPRFDRMEGNPICIQIPWDRNPEALAKWAEGKTGFPPWIDAIMTQ  
LRQEGWIIHLLARHAVACFLTRGDLWVSWESGVRVDFDELLLDADFSVNAGSWMWLSCSAFFQQFFHCYCPVGFG  
RRTDPSGDYIRRYLPKLKGFPSRYIYEPWNAPEISQKAAKCIIGVDYPRPIVNHAEISRNIERMKQIYQQLS  
RYRGLCLLASVPSCVEDLSHPVAEPSSSQAGSVNSAGPRPLPSGPASPKRKLEAAEEPPGEELSKRAKVAELP  
TPELPSKDA

>Chlorocebus\_saba\_XP\_008002745.1

MGVNAVHWFRLGLRLHDNPALKECIQGADTIRCVYILDPWFAGSSNVGINRWRFLQCLELDANLRKLNSRL  
FVIRGQPADVFPRLFKEWNIITKLSIEYDSEPFGERDAAIKKLATEAGVEVIVRISHTLYDLDKIIELNGGQ  
PLTYKRFQTLISKMEPLEIPVETITSEVIEKCTTPLSDDHDEKYGVPSLEELGFDTDGLSSAVWPGGETEALT  
RLERHLERKAWVANFERPRMNANSLLASPTGLSPYLRFGLSCRLFYFKLTDLYKKVKKNSSPPLSLYGQLLW  
REFFYTAATNNPRFDKMEGNPICVQIPWDKNPEALAKWAEGRTGFPPWIDAIMTQLRQEGWIIHLLARHAVACFL  
TRGDLWISWEEGMKVFEELLLDADWSINAGSWMWLSCSSFFQQFFHCYCPVGFGRRTPNGDYIRRYLPVLRG  
FPAKYIYDPWNAPEGIQKVAKCLIGINYPKPMVNHAEEASRLNIERMKQIYQQLSRYRGLGLLASVPSNPNGNG  
GFMGYSANIPGCSSSGSCSQSGGILHYTHGDSQQTHLLKQGRSSMGTGLSGGKRPSQEEDTQSIGPKVQRQS  
TN

>Chloroceryle\_aene\_NXI52898.1

MSHRTIHLFRKGLRLHDNPALLAALESSEVVYPVYILDRKFLTSMHVGLRWHFLLQSLEDLQKNLGQLGSC  
LLVLQGEYEALLRDHVQEWNIQVTLDAEMEPFYKEMEATIRRLGEELGFVLSLVGHSLYSTDRILELNGGT  
PPLTYKKFLHILSLLDPELPVRNLTAEDFQRCGAPDPGLAEQYRVPLPVDLKLPPQENLSPWRGGETEGLQRL  
EKHLTDQGWVTSFTKPRTPVNSLLPSTTGLSPYFSVGCLSVRTFFYRLSNIYAQAKHHSLLPPVSLQGQLLWRE  
FFYTASATPNFTQMVGNPICLQIRWYEDAERLHRWKMAQTGFPPWIDAIMTQLRQEGWIIHLLARHAVACFLTR  
GDLWISWEEGMKVHLGFISFVLGDRGLVEQVQVSATKMLRGLPLEPSWGDRLRELGLKLYLPVLKNFASKYIYEP  
WTASEEEQKHAGCIIGNKRRVMFWCAFCPPHPRPSRGHRAGVREGPRNFNSSSPRAADDTDDPELKLKRHS  
QENISKGKLARTTK

>Chloroceryle\_aene\_NXI53963.1

RFLQCLELDANLRKLNSRLFVIRGQPADVFPRLFKEWNIKLSIEYDSEPFGERDAAIKKLASEAGVEVI  
VRISHTLYDLDKIIELNGGQPLTYKRFQTLISRMELPEMPVETITPEVMEKCTTPVSDDHDEKYGVPSLEEL  
GFDTDGLPSAVWPGGETEALTRLERHLERKAWVANFERPRMNANSLLASPTGLSPYLRFGLSCRLFYFKLTD  
LYKKVKKNSSPPLSLYGQLLWREFFYTAATNNPRFDKMEGNPICVQIPWDKNPEALAKWAEGRTGFPPWIDAIM  
TQLRQEGWIIHLLARHAVACFLTRGDLWISWEEGMKVFEELLLDADWSVNAGSWMWLSCSSFFQQFFHCYCPVG  
FGRRTPNGDYIRRYLPVLRGFPKYIYDPWNAPEISVQKAAKCIIGVNYPKPMVNHAEEASRLNIERMKQIYQQ  
LSRYRGLGLLATVPSNPNGNGGGLMGYSPGESISGCGSTGGAQLGTGDGHTVVQPCALGDSHTGASGVQQQG  
YCQASSILHYAHGDNQQSHLLQAGRTALGTGVSAGKRPNEEETQSVGPKVQRQSTN

>Chloroceryle\_aene\_NXI54913.1

RFLQCLELDANLRKLNSRLFVIRGQPTDVFPRLFKWGVTRLTFEYDSEPFGERDAAIKLAKKEAGVEVV  
IENSHTLYDLDRIIELNGHKPPLTYKRFQAIISRMELPKKPVSTVIRQQMETCKVDIQENHDDVYGVPSLEEL  
GFPTDGLAPAVWQGGETEALARLDKHLERKAWVANYERPRMNANSLLASPTGLSPYLRFGLSCRLFYRLWE  
LYKKVKRNSTPPLSLYGQLLWREFFYTAATNNPKFDRMEGNPICIQIPWDRNPEALAKWAEGKTGFPPWIDAIM  
TQLRQEGWIIHLLARHAVACFLTRGDLWISWESGVRVDFDELLLDADFSVNAGSWMWLSCSAFFQQFFHCYCPVG

FGRRTDPSGDYVKRYLPKLGFPSTRYIYEPWNAPESVQKAAKCIIGVDYPKPMVNHAETSRLNIERMKQIYQQ  
LSRYRGLCLLASVPSCVEDLSGPVTDASASGQGCSTGTAMRLSQADQASPKRKHEGAEEELCTEELYKRAKVTGL  
PAAEIPGKN

>Chloroceryle\_aene\_\_NXI55221.1

DNWAFLYAQRLALKQELPLHVCFLVPKFLDATIRHYGFMLKGLQEVAEECAELNIPFHLLLGyakDVLPAFV  
VEHGVGGLVTDfCPLRLPRQWVEDIRERLPEDVPFAQVDAHNIVPCWVTSPKQEYSARTIRGKIHAQLPEFLT  
EFPPVIHHPYSPSCPAEPIAWEACYSSLQVDLTVKEVEWATPGTAAGLAVLQSFIAERLKSFSFHRNDPNKAA  
LSNLSPWFHFGQVSTQRAILEVQKHRGKYKESVDAFVEEAVVRRELAENFCYYNENYDSVQGAYDWAQTTLKV  
HAKDKRPFLYNLQELEQGTTHDPLWNAQLQMVHEGKMHGFLRMYWAKKILEWTRSPEEALRFAVYLNDRYEL  
DGSDPNGYVGKRCLWSICGVHDQGWAERAIFGKIRYMNYAGCKRKFDDVDQFEHRYAP

>Chloroceryle\_aene\_\_NXI57620.1

KVDYDVCsNYGNWLYSAGVGNDRDNRKFNMIKQGLDYDGDGDYVRLWIPELRLGIKGADIHTPWALNSAALSQ  
AGVTLGETYPQPVVTAPEWSRHISQRPQGRSPRPRDRRGAHPAAQHKDRGIDFYFSSHKKDA

>Chloropicon\_pri\_QDZ19648.1\_cry/DNA\_ph

MVAVKKEGGPLRKRLVWFRKGLRVHDNPALLEASQSAAEVYPVFVLDPSIDPTEDGVKIGANRAQFLLESLE  
DLQSLKKLGSHLICIRGRPEDVLPPLMRELDINHLGFEFDTEPYWKAQGEKMAKEAENLGARVHCPATHTLY  
DPEHLMACMMDAPKSYGQFLKLVAKCGSPPAVASAPESLPQISKDVLGRKHSGVPTLRDLGYEPLPASERTP  
FPGGETEALRRLEDQFRDTRRIALFEKPKTSPTDFETPSTTVLSPYLKFGCLSSRVFYFKLKEAYRKNGKHAD  
PPVSLLGQLYWREFFYLCGYAFPNFGKMEGNPICRQIPWDHSEGGKEKLRAWESAQTGYPFIDAAMTQLRQQG  
WLHHLARHAVACFLTRGDLWVSWEGRKVFDDKLLIDADWSLNNANWMLSCSSFFYQYFRCYSPVAFGRKYDP  
SGKYIRNFVPALRKMPKQYIYEPWKAPLSVQEAAGCIVGDYMPVCDHAVASKENMSKMAAAYKKAKSESPP  
PKKKAKKAK

>Chloropicon\_pri\_QDZ19871.1

MLRSEAKEAGLLDGGRRRGVLVWFRDLRLHDNETIYAAAMRARETNTLVNFCYIHRDVASSREPWHRRQG  
GASLRALDDHLIETFGEGGKVIIFRECEDEHDGVVSALAEVAEACGSSEIFFGRCFEELVAEEKHAQMQLSRL  
HGLRSKAFSTFLLHDPEAVAIDMRWKGHFGTLTPFHFAKQQRKELKTFPVPASMRIGEASVALEKAWTLEN  
DSNGFEVFLSTGVRDGDAAALSSSESSWVDKLVQNWFDGSTECFGEVHALKLLDEFIQHKMNKYESSRGYADA  
RAVSKLSPYLHFGVLSPAHMANRLEKSGCEAASKTLWRRLVWRDLAYWQLHHWPRMPTQPIRRFYEEHEWRED  
AEALERWKRGRGTGFPLVDAGMRELWHTGWMQQNARMCCALFTEYLVNHWARGAEWFHETLFDADLAINSMMW  
QNAGKSGLDQWNFTVGPTAKSLDPSGDYVRRWVPELKRPLPKPFLHAPWEATEAVLVEAGLSLGENYPHRISAV  
ADVASAKNRNLQAVLKLREKAKRSGFVDENGYDLIKAPRGSCRGSSNNGKVRVFTKPEYRRNGQKKTGGQONQK  
RGKKRPKVGKETKVVLRLQLSLEALRMDH

>Chloropicon\_pri\_QDZ22001.1\_cry

MTKMANGNGLKSSSKRLVLWFRNDLRLHDNAIVDKAKRSVASGDCKEVLPLYCFDPRVFQORSEYGS PKTGVRH  
AKFLVESVMDLRERLRSVGSDDLIAVNKPENVIADLVGDNGTSVFAQREVTHEERVTESLVEGILAGSERARL  
ELFWGATLYHRGDLPFKSNLRDLDPVFTPFNRKVEKQCSVRSLLSEPRAGDLPLGDAANLPLVKKMTNYEPSL  
KDILPGVDVPDQDERSLSFRGGEAAALERLRYLWDSDDLSTYFETRNGMVGGDYSTKFS PWLANGCLSPRK  
IYHEISEYERERVANKSTYWVVFELIWRDFFHFYCEKHGNSVFYPGGPAGRRNDWNDRDALRRWKEGRTGVP  
LVDANMRELLHTGFMSNRGRQNVASFLALDLKGDWRVGADHFESLLLDYDVC SNWGNWVSAAGLTGGRVNRFN  
IVKQSKDYDKAGEYIKLWIPELKRKVPQTQYIHKPWEMPRSVQESSGCFIGQDYPNPVATSKAWETYNGGKKSE  
KSKPYRGYYEKRSVRKEKKKSNFEMYG

>Chloropicon\_pri\_QDZ22673.1\_photolyase

MTETMSAESKPTRETVHKSrwRELNVAGAENHKASGPVVYLCYRDQRARDNWALLHALHVAETKGKAVVVLVFL  
TESQLRLGHRHSLFMIKGLQEMQKHLAALNVFHLVLGEPAAVVADVIAAWDAAALVTDfSPLREARQWRDSV  
AGSIQIPFHEVDAHNIVPIWITSNKQEYAARTIRSKIHRNIPQYLRAIPKPRKQDFDFSNTKGSFGEPNAVAW  
DDLVALAREKGQSDVPEVSWCEPGEEAALRALKGEDNSFLTkmrmnkyDELrnnPNKPAALS NLSPYLHFGQL  
SAQRCAIEAIGFKNNPSSNKSVDNYLEELVVRRELSDNFCFYNDLYDSVKGAASWAQETLQIHSSDKREHLY  
DKEALEQARTHDDLWNAAQKELTSFGKMHGFMRMYWAKKILEWTASPEEALDIAIYLNKYSLDGRDPNGYVG  
CMWSICGTHDQGWREREVFGKIRYMNYNGCKRKFDDVDAYVQIRREMKQNRIFYNEK

>Chloropicon\_pri\_QDZ25668.1\_cry/DNA\_ph

MATERDERAAKRLATESAEPLPQAVGPSSVTQAGKLSRVVWFRDLRLLEDNPALMAALRAGREVIPLFIWAP  
EEEGVFTPGLSSRWLTLQSLESLSRKLEALGSRLVLFTPTTKEGIVPFVKDNDIQAVYFNHLYDPI SLVRDK  
GIRTLQGLNVHVESFGADLMYEPWEIYDEKGQVFNTFDKFEHIVNKMPYEPFMPLPCPVAMPKVPDEVKGN  
RASLDEVAIMTEEEAATSEHLKEKWMPGSDSAHMVWNKFLCEKLAFKQEKAMVHSDCTSRLSPHMYGEISV  
SSLYFVLKKMKLSLSTALDSEQQIASVDKYIKQLGYREFSRYILFHNPFTHERPLLEHLCAVPWQYDQDLFKC  
WQQGCTGFPLIDAGMQELWSTGWCHNRLRILVGHFFVKYLNLPWQWGLKYFWDTLIDADLECDALGWQYLSGC  
MIDAPPFYSYIMDYEEECKRFDPDGKYVKKWLP LLARVPSKFIHTPWKAPAKILRASGVDMGITYPHRVVNMDQ  
VRKSVKHCCECLEAQKCGPQRGPFRHPTRSDPSRPSSMRTGTADEGMDGPYLPgKTKPEKADSVGLGGVQSHI  
SETDGCHNESTGVVES

>Choloepus\_dida\_\_XP\_037694977.1

MAATAVMAGSASLAPASGTEGASSVHWFRKGLRLHDNPALLAAVRGARCVRVCVYILDPWFFAASSSSVGINRWRF  
LLQSLLEDLDTSLRKLNSRLFVVRGQPADVFPRLFKWGVTRLTTFEYDSEFPFGKERDAAIMKMAKEAGVEVVTE  
NSHTLYDLDRILIELNGQKPPITYKRFQAIISRMELPKKPVGSVTSQQMESCRAEIQENHDETYGVPSLEELGF  
PTEGLGPAVWQGGEAEALARLDKHLERKAWVANYERPRMNANSLASPTGLSPYLRFGCLSCRLFYRRLWDLY  
RKVKRNSTPPLSLFGQLLWREFFYTAATNNPRFDRMEGNPICIQIPWDRNPEALAKWAEKGTGFPWIDAIMTQ  
LRQEGWIHHLARHAVACFLTRGDLWVSWESGVRVFDLLELLDADFVNSGSGMWWLSCSAFFQQFFHCYCPVGF  
RRTDPSGDYIRRYLPKLKGFPSRYIYEPWNAPEISIQKAAKCIIGVDYPRPIVNHAETSRLNIERMKQIYQQLS  
RYRGLCLLASVPSCVEDLSNPVAEPSSSQAGSMSSAGPRPVPSGPASPKRKLEAAEPPGEELSKRARVTELP  
TPELPSKGV

>Choloepus\_dida\_\_XP\_037702498.1

MGVNAVHWFRKGLRLHDNPALKECIQGADTIRCVYILDPWFAGSSNVGINRWRFLLQCLEDLDASLRKLNSRL  
FVIRGQPADVFPRLFKWVNITKLSIEYDSEFPFGKERDAAIKKLATEAGVEVIVRISHTLYDLDKIELNGGQ  
PLTYKRFQTLISKMEPLEIPVETITPEMIEKCATPLSDDHDEKYGVPSLEELGFDTDGLPSAVWPGGETEALT  
RLERHLERKAWVANFERPRMNANSLASPTGLSPYLRFGCLSCRLFYFKLTDLYKKIPWDKNPEALAKWAEGR  
TGFPWIDAIMTQLRQEGWIHHLARHAVACFLTRGDLWISWEEGMKVFEELLLDADWSINAGSMMWLSCSSFFQ  
QFFHCYCPVGFGRRTDPNGDYIRRYLPVLRGFPKAIYDPWNAPEGIQKVAKCLIGVNYPKPMVNHAESRLN  
IERMKQIYQQLSRYRGLGLLASVPSNPNGNGGLMGYSPGENIPGSSSGSCSQSGSILHYAHGDSQQTHLLKQ  
GRSSMGIGLSSGKRPSQEEETQGIGPKVQRQSTN

>Chondrus\_cri\_XP\_005711398.1\_unnamed\_pr

MPAMLLAFASGLPLNQKFLSTFFSPRNGKCQLFVQMPRTFANRNAEANNRSRVGQSYTRSSSGRRGNRGGGRY  
GGNRRNAAPRAQVDPFAGDPVIPSAPATLPSDSCAMVWLRNDLRVRDHAALALADTASVLVPFYVFDTSQYG  
PDHLSPHGFQRTGPFRAFQKQAVKEMQALRVRGSDLVVKIGDPVDEIMPVARQLIEEGFKPLRMVAHKEVT  
WEENKTEERMEKAFRELGEEMHADVDIHFWGATLHLLDDLFPNAGGPGVPETFTAYRKLEIERNGATVREEI  
KMPGRFKPYPLHIGIPSDEMPLLGDELEVAGLAEPNDHPYPHPLACVDFIGGLKEAEKRLDEFVWKADALRTY  
KETRNESGKNGSSKLSPLWALGCISPRTVYWECSYEEKREKNESTYWMVFELMTRDYFRWIAASVGTKLFA  
LNGYSGRGKNEASIWGIPWHLIKPLHKDRLQKWIDGKTGAPIVDGNMRELAGTGFMNSNRGRQNVASFLIHDLG  
YPDWRAGAEYLESQOLIDHDVASNANWAYLAGVGSDFRGGGRKFNVVKQSMQYDPEGRFLNRWVPELVDPVPM  
KHEPHTLSKAELEDLNVTPGKTYPNPIVPLSRAPQK

>Chondrus\_cri\_XP\_005711823.1\_unnamed\_pr

MSQANAARMHNPSPPSPSALTQAPITNASRRIRRRRAASPPAKRRRTASSTEDADSVSPPASPSPELRQPPSQAT  
APQGAkWFRKPSVVWYRGNDLRVEDHPALLAASQRGGPVPLFIWDPSSDFSGDLGHVKQWWLRESLSCLQRD  
LKRLGVQLYTRTGKSTEELRNFLCDTGADAVFWNRCYEPDLLTRDEELRDELLSEGLTAESFKAELLVEPWEL  
KNTEVNPRIYETFRSYMRAWMTFAPPPEFPFPCPSRLTAITSEVKSQVIGSALAFDIPHTLEEVLQKTWTGPSVQA  
NAQLEKFLIEVFPAFGDNRCRRHFDGTSRLSPHIRFGELSPRMYHSTRMRVSRWDQGSMLSAAASRKWSLAM  
SNGGKQEWKRASLLESLESGREVNREREPQGDTRSSPLTSGTHAKQEEESVGDKGGRGRPQPTPEKPPKTNF  
RHMMRSAAAVQRPALPPIQSARAFRLNLCRLDFSYHILFHNPDFHAKPLIPEYVNFPAEDKGSFTAWQTAK  
TGYPIDDAAMREL RATGWIHNRMRFLACFLT KYLLLPWSRGLKEFYGLLLDGDHSSNALGWQWTAGSNTYAA  
TLRNLNLPVKSASQHDPHGYSYVRQWLPELANLPTNFVHEPWKAPPDVLHAAGVELGTTYPNRIVMLKEARVRA  
FEAMRLMRQIFASAGVSRKLEVEDEEDLVMGWREDHSEVFPVEESAVTGTKRTLLPCLWALLQSDQEPYLSN  
SSSGSDPLIARDTASLTEGALAVPMDDQQESIENALLTAHNHGPPPEVLVIPLAETADDQALGDPITYPQEK  
CETEGMMVGPSSDNLVPVHGLGEPLKYHDSEVCAFPESENVSDRQAPMEADGSRVRTDSARARTRPDPVQVGA  
PNTCRGSAAQALNPSVPFPHQPPYQLQQFQQLQQLHKKFQLQNMHVHQQQQRQETQQHQRAAQQQRTSQHTSP  
HQHIHYPNSALPQRQPPHVHAMADAIYQQGCSNGSLPSTSLAGVPMGPAPVMMGPATGSQDLSANAMFTGGD  
RGSSVYAHPLGFGQFYGFPPVMPILNAPAANGGERNDGILSSATTDMSKLPAPGMMAMPYGYMGNMFEQNVL  
GGAHQAGNNHYASSLPQMQRQSPYRYSPPMYFPHTTPEISPAQGNHVPHRPSPSIPQSRHLDMPSVANA  
PNATAAAAVAGREREAQAQVASSNANTRTLPKSEQLTVDARNTPGLKPGFGVASRSVDTTKPLNSKVTNANTRL  
GQGRPRGRNNARSKAALKRKGSASNGIAKNRNEVKSSSNGRGQSGRSTAQEKGPKEQTQPGGTTLKARQE  
MLASVLGKEDHGFHGFYAKYLSSTYELTASTDRKTSKDYIRLCNLKDDYHKQCKSDKLKIYGIKSFSSKVLNLD  
VTGEWDRHNHGGVRGPYVYGIRPRRSTNPS

>Chondrus\_cri\_XP\_005712174.1\_unnamed\_pr

MPTAFLFPTTRVFFGKSVQNLREYRAIATSTHCLDVHPANYLAAPRRFVATMSSLSSPVERERVRTLNDPHAN  
TKGSHVVYWMNNAVRVRHNPALAEAAHMAASMEQALRVYILMDVTAQDSQPLPERHTSFLQLGLADVAASLRQ  
RKVPFVVLSPAEADVAIPAMAKDASAVTSDASYLRPGIATRKAARALQVPLIVVEADVVPVETATNKAEH  
AARTIRPKINRLRDDFLEPLEQVALPYQEQQDGKWDVADDWLEDGRKTEDRIDHVDVKKHDDVLASLQGLDRG  
APLVSSFKGGEKEAQEVLKTFLEKRLREYGPGRNEPSKQLQSDLSPLYLRAGNISPV DIALQTLDFAKDKKSGM  
KESLDSFLEELIVRRELAANACWFNPDKYDAYEHIVPSFARASLELHKADKRPTTYTYEELEAGLTHDDYWNA  
AQLEMVVRGKQHGMYRMVVKQIIGWVDDPAVAMDYGLRLNNRWELDAVDPN SYAGVIWCFGLHDQGWKERPI  
WGKVRYMNDAGLKRKFNMAYVAMVDRLIAEQGLPAHIAALRKARGADRRQKTIDQTMKRKRKTSAAPSNKAA  
KESLLRSIKRLKE

>Chondrus\_cri\_XP\_005718107.1\_cry/photol

MTLPGSVLHWFRDLRTADNRALNRAISLAKKSNLPLIPVFFLDPEYHNPTACGPLRMRFILSISALQORSID  
DKCSSRLRVICARPTDVFDPDLVRRWGVKHLVFEYIYAPSERARDEAVVADVEGFDVDVREHGFTLYNPNVLL  
QKAKGATAPTTMSSFLSLVDDVGD PENPVEFADGRQVELTSCPDATLKDDDDKGYLLVPKLGDIGYEDCTKQT  
GWERFRGGEEGIARMDEFLSREGGKVAARFAKPKTSPA AFVKRETTVLSPYLALGCVSSRVF HARLRDLEEN  
HDVAEMPQTRLWGQLMWREHFLLAGMVPEFHRMNGNPNVCRKINWRTGDEAELRLKTWAEARTGYPWIDALMM  
QLKTEGFVHHLGRHSLACFLTRGDLWVSWEEGYKVFEHYLVDYDYALNSANWMLSCSAFFSMYFRVYSPVAF  
AKKWDKEGAFIKHYLPVLRKLPKYIHEPWKAPAMVQKMAGCVIGKDYPERMVDHASKASKENIAKMKENYARN  
EYGAERGERQHMNGESRSSESRDSGDTSRKTKRRKTRR

>Chrysochloris\_asia\_\_XP\_006865104.1

MAAARGTVTTAALESAPSTDGASSVHWFRKGLRLHDNPALQAAVRGARCVRVYILDPWF AASSSVGINRWRF  
LLQSLLEDLDTSLRTLNSRLFVVRGQPADVFPRLFKWGVTRLTTFEYDSEFPFGKERDAAIMKLAREAGVEVVTE  
NSHTLYDLDRILNNGQKPPITYKRFQAIIVSRMELPRKPVGPVSSQQMESCGAEIQENHDETYGVPSLEELGF  
PTEGLGPAVWQGGETEALARLDKHLERKAWVANYERPRMNANSLASPTGLSPYLRFGCLSCRLFYRLWDLY  
KKVKRNSTPPLSLFGQLLWREFFYTAATNNPRFDRMEGNPICIQIPWDRNPEALAKWAEGKTGF PWIDAIMTQ  
LRQEGWIHHLARHAVACFLTRGDLWVSWESGVRVFEDELLLDADFSVNAGSWMWLSCSAFFQQFFHCYCPVGFG  
RRTDPSGDYIRRYLPKLKGF PARYIYEPWNAPEPIQKAAKCIIGVDYPRPIVSHAETSRLNIERMKQIYQQLS  
RYQGLCLLASVPSCVEDLSNPVAEPSPSQAGVLSSAGPRLLPSPGPASPKRKLEAAEEPPGEELSKRARVAEEP  
SLKQLSKDV

>Chrysochloris\_asia\_\_XP\_006865309.1

MGVNAVHWFVRKGLRLHDNPALQECIQGADTVRCVYILDPWFAGSSNVGINRWRFLLQCLEDLDANLRKLNSRL  
FVIRGQPADVFPRLFKWEDITKLSIEYDSEFPFGKERDAAIRKLATEAGVEVIVRISHTLYDLDKIILNNGGQP  
PLTYKRFQTLISKMEPLETPVETITSEVMGKCVTPLSDDHDEKYGVPSLEELGFDTDGLSLAVWPGGETEALT  
RLERHLERKAWVANFERPRMNANSLASPTGLSPYLRFGCLSCRLFYFKLTDLYKKVKKNSSPPLSLYGLLW  
REFFYTAATNNPRFDKMEGNPICVQIPWDKNPEALAKWAEGRTGF PWIDAIMAQLRQEGWIHHLARHAVACFL  
TRGDLWITWEEGMKVFEELLLDADWSINAGSWMWLSCSSFFQQFFHCYCPVGFGRRTPNGDYIRRYLPVLRG  
FPAKYIYDPWNAPEGIQKVAKCLIGVNPYKPMVNHAEEASRLNIERMKQIYQQLSRYRGLGLLASVPSNPNGNG  
GLMGYSYPGENIPGCSSSGSSSQSGSILHCAHGDSQQPHLLKQGRSPMRPGLSSGKRPSQEEETQGVGSKVQRQ  
STN

>Chrysochromulina\_KO031888.1

MTQLWHVGWMPNMYMRHVVAGFLVEFLNFDWRHGERWFAETLVDADTA INAYMWQNGGHSGMDQWNFMHPVFA  
AKSCDPEGDYVRRWLPQLAKLPIEFIHCPWEAPAALRATAKVVLGNRGANYAQRIILVDLEAARRRSFAAVME  
VRRGAGKDYILPSGHEAMALDNGQRAVLITRVDFREGKLTTRQTAESKWDERRRERTDDLSRAMQDSMREHSA  
ANSLDGGRLRLAEEEQ

>Chrysochromulina\_tob\_KO026945.1\_photolyase

MLRGLQEVRDLRLDGLIPFKVLSGNPVDEVPSFLRRHEGCALVTDFSPLRTGRAWKSAVGEKLSSTPFYEYVDA  
HNIVPVWVASDKQEVGARTIRKKINEKLPMWLKDFPPELPQPIEPPLHAQAVAAPLPAEDTSGIISPVPAPS  
STSDRTSVLDEGTLMALSAQLEAAVVASPLDLATAERVLGQLEGVRIDRALLKATGVGKAANELAKAKCDLST  
RARPSGSARSLALPRHPSASLLGECVAPT DWTALEKSLVIDRNVKQVDWLLPGPAAAREAVHAF CASRLALFA  
DKRNDPNVHAHSDLSPYLHFGQLSAQRMALMVQAAVAAPQAALQAGLESFLEESIVRRELSDNFCFYNPNYD  
NLNGAAGWARESLELHAADKREHVYTLKQLEEAQTHEDIWNAAQRMARTGKMHGFM RMYWAQEDSPALIASD

>Chrysochromulina\_tob\_KO031536.1\_6-4\_photol

MARERGVQVTRWGHTLTDLDA LLKRHPGGKPTTTYSSFLNHLDKQLKAVPLAVLNKPRQLPPVVDADLAGLG  
ASAATSASSSAAPASDAADAFGVPSAAALCLGPATSGVILRGGETEALARMEACLSQQGGAWVA AFEKPSTSP  
TEIDPFGQHTRSTTCLSPYLKFGCLSARVLHERVA AVYAAHPKHAKPPTSLHGQVYWREFY YACAHGTPNYEM  
MAANPICRQIPWEDDPELLAAWREARTGYPWIDAAMTQLREEGWIHHLARHAVACFLTRGDLWQSWEKGA EVF  
EELLLDADPAINRGNWMWLSCSCFFYQYFRCYSPVAFPKKYDKGAYVRKWL PQLKDFPAKYIYEPWKAPIAD  
QKKANCIIGQDYPKPIVNHELKRALTQQKLPM SKKVLPRVEP

>Chrysochromulina\_tob\_KO053579.1\_photolyase

MSVAAAATLTAATAALTSSRPFRFVVWFRSDLRMHDNPVLHKIAALPGAKEIVPVYCFDPRHFAKDAPH SFGCA  
KTGVLRAKFMCESVADLRSSLRACGSDLLVAVGKPEELLPTLVQPASAGPTTFVTQQQLTSEELRVDRAV VSA  
LKKAHGSASAPALRTIFSGTMYDDENLKT MFGDDYASMPDVFTPFRTKVEAKLVI PPPLASPKPGSLPLPANA  
GAVATAAAAAAVGGAGFDSMPSLSALGFSSEEVTSAA TPDPRGAMPFPGGERAALARLQHYIWDADCLGTYFE  
TRNGMLGADYSSKFAPWL AHGCLSPRLVAAECAKYEQRVKNKSTYWLVFELLWRDFFRLYAAKHGDAIFHIE  
GPARVRSKWVSNPELLQRWKEGR LGVPLVDANMRELAATGFMSNRGRQNVASYLALDLALDWRTGASWFEETL  
LDYDVASNWGNWASAAGVTGGRVNRFNIVKQSKDYDADGAYVRHWLPELKEVPAAKIHEPWTL SRDEQQRLRG  
VFLKPRTTLSQRPMRGVPMRTAV

>Chrysoperla\_carn\_\_XP\_044730763.1

MNSLFMTKINIKNSAAFCSEYIEGTWRAMSSGVGSAGDIRKTGGPPPPDKHMHVHWFRKGLRLHDNP SLREGL  
VGATTFRCVFILD PWFAGSSNVGINKWRFLLCLEDLDRSLRKLNSRLFVIRGQPADALPKLFKEWGTTSLTF  
EEDPEPYGRVRDENITALCNELGISVVQRVSH TLYKLHQI IENNGGQAPLTYHQFQAVIANMDAPSAAEGGIT

KKNIGNATTPLTDDHDDKYGVPTLEELGFETEGLLPPVWQGGESEALARLERHLERKAWVASFGRPKMTPQSL  
LPSQTGLSPYLRFGCLSTRLFYYQLTDLYKKIKKACPPLSLHGQLLWREFFFYCAATKNANFDKMIGNPICVQI  
PWDKNAEALAKWANGQTGF PWIDAIMTQLREEGWIIHHLARHAVACFLTRGDLWLSWEEGMKVFEELLLDADWS  
VNAGMWMWLSCSSFFQQFFHCYCPVRFGRKADPNGDYIRRYLPVLKNFPTRYIHEFPWVAPESVQRAAKCIIGK  
NYPLPMVNHAVASRINIQRMKQVYQQQLARYRNDDAEKKNLINVANQRQNMVAMSPSPNTVMSSINNSYNLAVS  
QKQSSIPNNKTESAYNIASEQYNTDYNQQQNQOTSQHQQFYTIVQTNHSINTFTESLNNQQEQFKQQHHHQQE  
QQQQSNQEQYENTRQTYCEPMKQSPINTQHNYDYMRENRRNFCNEPIKKSNLHNFCEPMKHSPMVQIEQESYK  
QNYQVTVQDNDGNTSVVTIVQQQQQEQLIGNCSRTNTINDDDSSMTINIKREEQRQ

>Chrysoperla\_carn\_\_XP\_044734495.1

MESSALWFRHGLRLHDNPSLHEAIKDRDRLFYPIFIFDGESAGTKLCGYNRMKFLTECLEDLDKQFRKYGGQL  
FVFENKPEVVFKALNKHYNLKLLCFEQDCEPVWRVRDENVKRLCDKRGVKWMECVSHTLWDPFRVIEENGSTP  
PLTYQAFLYVVSNIIGNPPRPVDDVNWQGIKFGIISPEIAAELKMFPKVPTAEDLGYTREAPNEIRMFRWIGGE  
TQALKLLQNRLAIEKSAFDGGYFLPNQANPDLLGAPTSQSAALRFGCLSVRRFYWNLDQVFKTVHGGNLPPSP  
HITGQLIWREYFYTMSVNNEYAEMERNPICLNIPWSEPKKEDLNRWKYGKTGF PFIDAVMRQLLLEGWVHHV  
ARNAVACFLTRGDLWISWEYGLHHFFKYLLDADWSVCAGNMMWVSSSAFEQVLDCEVCVPAFGRRLDPGGE  
YVKRYLPELRLSPSEYLYEPWKAPIDVQERSNCIIIGKDYPPPIVDHTEASKRNKYFMQTLREQIMGGGNAPPH  
CRPSDENEAKSFLGLPSQCHEHCLIQI

>Chrysoperla\_carn\_\_XP\_044735319.1

MIANEYIASQKRTNSEAFKTKTKDDSTVKDETKTNDLITSLKEKRNQTAKSILDFDFKKKRVQILSQAKEI  
KESDSSGGIYWMFRDCRVQDNWALLFAQKLALKNELPLNIFCLPQKYLEYNARHYKFLIKGLEEVQEECDE  
LNINFNVCVGEPAIQVVDFIESNHIQGVVCDFLPLKDCMQWQESVLNQIDSNQIPFIRVDAHNIVPCWIASDK  
LEYAARTIRNKINSQLSQYLQQYPPVIQHKYNNKNI INKKKIDWNDVLNQLKYDKSDELINNNEITWAEGGTS  
NGLKMLQSFFQKRIQLFGTKRNDPTISALSNLSPWLHFGHISAQRCVLVIQELKSKYTESVNSYCEEVIIRRE  
LSDNFCYYNINKYNKLDGAPSWAQLTLKQHSKDKRTYLYTLDELQHGRTDHLWNSAQIELYKTGKLHGFMRM  
YWAKKVLWETESPEQALQYALYLDQYALDGNDPNGYVGCMMWSICGVHDQGWGEREIFGKIRFMNYQGCKRKF  
DIKAYIARWGGKEYNKKQETIPFKKLLK

>Chrysoperla\_carn\_\_XP\_044742491.1

MEKKTVIHWFRLRIHDNPALLAAIEEAVKSSSALRPIFILDPLIITWMRVGNRWRFLQQSLDQLNENLTK  
IGSKLYVIRGTPENVFKRIFKDOWNISYITYEYDTEPYAKRRDALIEQLAHEANIRIESEISHTIYNTQLVIKK  
NGGKAPLTMQKFLSVVDSMSKPPIPVPAPTKIPEICKPTLDSFEKENPHCYDCPTLLELKVNEKNLNACKFPG  
GETEALNRLNKILLKKSICNFEPNTSSNSLEPSTTVLSPYLKFGCLSSRLFYIEINKIISGQKHSKPPVSL  
IGQLMWREFYTYTSSDTPNFDKMGVNPICQVPWDTNEKHLEAWTYGKTGYPFIDAIMRQLRQEGWIHHLARH  
AVACFLTRGDLWISWEEGLKVDFDELLDSDWALNAGNMMWLSASAFFHQFFRVYSPVAFGKKTDFKGDYIKKY  
VPELNKYPVDYIYEPWKAPLSVQTKAGCLIGKDYPKRIVIHEDVYKVNISKMSLAYKNNKTNDNNKQKGESSK  
ESEPAKKMKVSKSTNTTKSDSKSKQTSLSLTKFLK

>Chunga\_burm\_\_NWS56282.1

KVDYDVC SNYGNWLYSAGIGNDPRDNRKFNMIKQGLDYDGNNGDYIRLWVPELQGIKADIHTPWALNSAALSQ  
AGVTLGETYPQPVVTAPEWSRHINQRPQGRSPHLRGRKGAHTPMQHKDRGIDFYFSRKKDV

>Chunga\_burm\_\_NWS56972.1

MPHRTIHLFRKGLRLHDNP TLAALETSEAIYPVYILDRKFMTSVMHIGALRWHFLLQSLEDLQKNLCQLGSC  
LLVIQGEYESVLRDHIQKWNITQVTLDAEMEPFYKEMEANVRCLGEELGFVLSLVGHSLYDTKRILDLNGGT  
PPLTYKRFLHVL SLLGDPEVPVRNITAEDFQRCRPPDSSLAERYRVPLPMDLKI PLESLSPWRRGETQGLQRL  
EQHLTDQGWVANFTKPTIPNSLLPSTTGLSPYFSMGCLSVRTFFYRLSNIYAQAKHHSLLPPVSLQGQLLWRE  
FFYTVASATPNFTKMAGNPICLQISWYEDAELKHKWKTATQTFPWIDAIMTQLRQEGWIHHLARHAVACFLTR  
GDLWISWEEGMKVFEELLLDADYSINAGNMMWLSASAFFHQYTRIFCPVLFGKRTDPEGQYIRKYLPI LKNFP  
SKYIYEPWTASEEAQKQAGCIIIGQDYPPFMVNHKEASDHNLQLMKQVREEQYRTAQLTRDDTDDPMEMKVKRD  
HSEENISKGKTVMTE

>Chunga\_burm\_\_NWS57622.1

CIIYILDPWF AASSAVGINRWRFLLQSLEDLNSLRKLNLSRLFVVRGQPTDVFPRLFKWGVTRLTFFEYDSEPF  
GKERDAAIVKLAKEAGVEVVIENSHTLYDLDR IELNGHKPPLTYKRFQAIISRMELPKPVSTVISQQMETC  
KVDIQENHDDVYGVPSLEELGFPTDGLAPAVWQGGETEALARLDKHLERKAWVANERPRMNANSLLASPTGL  
SPYLRFGCLSCRLFYRLWELYKKVKNSTPPLSLYGQLLWREFFFYTAATNNPKFDRMEGNPICIQIPWDRNP  
EALAKWAEKGTGF PWIDAIMTQLRQEGWIHHLARHAVACFLTRGDLWISWESGVRVDFDELLDADFSVNAGSW  
MWLSCSAFFQQFFHCYCPVGFGRRTDPSGDYVKRYLPKLKGFPSRYIYEPWNAPESVQKAACCIIGVDYPKPM  
VNHAETSRLNIERMKQIYQQLSRYRGLCLLASVPSCVEDLSGPVTD SASGQGCSTSTAMRLSQADQASPKRKH  
EGAEELCTEELYKRAKV TGLPAPEIPGKGL

>Chunga\_burm\_\_NWS60171.1

DNWAFLYAQRLALKQELPLHVCFLVPKFLDATIRHYGFMLRGLQEVAEECAELNIPFHLLLGCAKDVLPAFV  
VEHGVGGLVTD FCLRLPRQWVEDVRQRLPEDVPFAQVDAHNIVPCWVASPKQEYSARTIRGKIHAQLPEFLT  
EFFPPVIRHPYPPSCVAEPIAWEACYSSLQVDRTVKEVEWATPGTAAGLAVLQSFIAERLKSFGSHRNDPNKAA

LSNLSPWFFHFGQVSTQRAILEVQKHRGKYKESVDVFVEEAVVRRELAENFCYYNDNYDSVEGAYDWAQTTLKL  
HAKDKRPFLYELQELEQGTTHDPLWNAQLQMVQEGKMHGFLRMYWAKKILEWTRSPEEALQFAIYLNDRYEL  
DGRDPNGYVGCLWSICGIHDQGWAERAI FGKIRYMNYAGCKRKF DVSQFERRYTPCT

>Chunga\_burm\_\_NWS60537.1

MGVNAVHWFRKGLRLHDNPALRECIQGADTIRC VYILDPWFAGSSNVGINRWRFL LQCLEDLDANLRKLNSRL  
FVIRGQPADVFPRLFKEWNI AKLSIEYDSEPF GKERDAAIKKLASEAGVEVIVRISHTLYDLDKI IELNGGQP  
PLTYKRFQTLISRMEPLEVPAETITPEVMEKCTTPVSDDHDEKYGVPSLEELGFDTDGLPSAVWPGGETEALT  
RLERHLERKAWVANFERPRMNANSL LASPTGLSPYLRF GCLSCRLFYFKLTDLYKKVKNSSPPLSLYGQLLW  
REFFYTAATNNPRFDKMEGNPICVQIPWDKNPEALAKWAEGRTGFPWIDAIMTQLRQEGWIHHLARHAVACFL  
TRGDLWISWEEGMKVFEELLLDADWSVNAGSWMWLSCSSFFQ QFFHCYCPVGFGRRTDPNGDYIRRYLPVLRG  
FPAKYIYDPWNAPESVQKAAKCIIGVNYPKPMVNHA EASRLNIERMKQIYQQLSRYRGLGLLATVPSNPNGNG  
NGNGGLMGYSPGESISGCGSTGGHLFPASPGAQLGTGDSHTTVVQPCALADSHTGASGIQQQGYCQASSILHY  
AHGDNQQSHLLQAGRTALGTGISAGKRPNPEEETQSVGPKVQRQSTN

>Chytriomycetes\_con\_TPX68125.1\_CcCBS67573

MASPKPRVCYWFRTDLRLHDS PALAAALNLKPEALFPLWCWDPNVNACCSLGL ESGVNR AFLQYVYKHRVGVH  
RFRFLLESMTVLSDQISAIQPN SKLLVVRGEPVELLPILWKKWGISHLVFEKDPSAYGRRRDAIVLKA AKLAN  
VTIVSVQGHHL YDPELVTLKNKGKPTMTITSLQNI VKKMGNVPKPVASPKELPLPL LKGSTKTERKDIFLELS  
NALRGTPIFSGNCLEGDTAVDLNSASLGGERHLPVTCYETVDGGDALFSVPTLES LGMSSEDKEAKIKGGEVIA  
LKRLATLCDDSKYIATFSKPKSSPAQWVDKPSTTLLSPYLKFGCLSIRKMWDVVEAKQRYIGAKTEPPENLN  
GQLLFRDMYACAEYAIGDAFGKVRGNEICRYMDWNLP TVYDESGVEIVPRPPGDSVSESRLKAFKDGQTGFPW  
IDAQMRQLKQEGWMHHLGRHSVAAFLTRGQCWISWERGAEIFDEY LIDWDPCSNPGNMMWLSCSAFYAQYFKL  
YGLVSFPQKYDKTGALVRKYCP ELAKYPDAYIYEPHKAPANVQKQAGCII GTDYPYPILDEKNSKDENMARMK  
ACYEAKFYGNSKEVLDGTANALIQQLHGLKGAPKEYVFP GSQKSGSASGSGKKESKTLDGWLKRKANSDEDGG  
RKK

>Chytriomycetes\_con\_TPX70061.1\_CcCBS67573

MSIKKS AVVCMQWNSLRASDQPV LQAALKLNSDYLVAMHVVD RQFVAAGSRASERRRAFYAASVRS LQTQLV  
QRGTGLV VLEESSSGSSNGLNEVRVSSVSISSAPATASSAVNPSED TANPSSAKSFSASAASLIAQK VALLS  
ETCRVD AVCVEDQNTVHELHFVDALKKAMAKLNLK LIVTPNAQTLVKHNAIASKYLPDTFTQFRLTVEKSGNM  
YREL FQIPSKLPPLPALEQAASQWHSSLSNETGASLEMDPRSAFPFAAGEKAALQRIQNYFTQTHAIKTYKG  
TRNELIGTQYSSKLS PFLAFGCVSASTVHNLLQ QYEATHGGNESTYWLLFELLWRDYFQFIGKKYGSQLYHLR  
GITTSTERIESTWKYNPRKFEAWITGHTGIPFVDANMRELLQTGFMSNRGRQNVASF LVRDLNLPWTLGAKWF  
EKHLLDHEPCSNYGNWQYVAGVGNDRPSDRYFNVIKQ GKDYDEGAYVKLWCP ELKNVPVSVIHC PWKMSFDE  
QKASEVALGVTYPLPIVEADAWKKHYAYSTKGKVGKANPSETVGRRPKRK

>Chytriomycetes\_con\_TPX75854.1\_CcCBS67573

MKRAASTSDHDSKRVKDDAQ AAPPAAQRPVVWIRSDLRISDNSALTRASRIAVADGNPLVVMFVVSPNEW  
LEHDMAAIKCRFILHCVSALRDALALLNVSFVTLTAASRRDVPQVVCDAVVRLNANRI LWNIEYIEI HETQRDK  
KVTKLLADRQIPSTACHDQCILMPGKARTKEGKVYTVFTPFKKTWITILQKDPSLYKLQPM SAPLPVASPALL  
ETITAISTGLPTTVPQPF EAPSQELIDFADKMYPAGEANARIRLESFVKARIKGYKNDRDSPGKDLTSRLSAY  
LALGVISPRECLVEALNANNQKFDSGSDGAVTWISELCWRDFYKNILVEYPRVCKNQPFKLETDNVTWTTDPE  
SPLFKAWCTGHTGYPIVDAGMRQLLAEGWMHNRVRMIVASFLTKDLGIDWRLGEKHFMRHLIDGDLASNNGGW  
QWAASTGTDSQPYFRI FNPTLQSEKFD PAGSYIRKFVPELKGVLGKEIHD PKGKLGLPRIAKLGYVAPIVDHK  
IASQAFLEAFKRIGIGK

>Ciconia\_magu\_\_NXJ33658.1

MQHSSIHWF RKGLRLHDNPALLAAADCRRLHPLFILDPSSSQAGANAQRFLLDALRDL DGLSREMGSRLFVV  
RGCPEEVFPRLFHTWGTTRLTFEVDTEPPARRRDAVAELAARHGVEVIREVSHTLYDTERVLALNDGKAPLT  
YKHLQSL LASLGPPEKPAPALTRDHLRGCTPCQVSHDANYGVPTLEELGQDPTEVGP HLYPGGKTAALARLD  
AVMERTAWVCGFKKPETEPNSLSPSTTVLSPYLKFGCLSVRTFWWRLDEVYQGREHSRPPVSLHGQLLWREFF  
YTAGAGIPNFD RMVGNPVCLQVDWDNNPQHLCAWREGRTGYPFIDAIMTQLRTEGW IHHLARHAVACFLTRGD  
LWVSWEEGLKVFEELLLDADWSLNAGNWLWLSGSAFFHRYFHIYSPVAFGKKTD RDGAYIRKYL PVLKEFP AE  
YIYEPWKAPRAVQERAGCLVGTHYPQPIVEHGAASKRNMGRMKAARTQK

>Ciconia\_magu\_\_NXJ33862.1

CIIYILDPWF AASSAVGINRWRFL LQSLLEDLNSLRKLNSRLFVVRGQPTDVFPRLFKEWGVTRLTTFEYDSEPF  
GKERDAAIVKLAK EAGVEVVIENSHTLYDLDR IELNGHKPPLTYKRFQAIISRME LPKKPVSTVMSQQMETC  
KVDIQENHDDVYGVPSLEELGFP TDGLAPAVWQGGETEALARLDKHLERKAWVANYERPRMNANSL LASPTGL  
SPYLRF GCLSCRLFYRLWELYKKVKRNSTPPLSLYGQLLWREFFYTAATNNPKFDRMEGNPICIQIPWDRNP  
EALAKWAEGKTGFPWIDAIMTQLRQEGWIHHLARHAVACFLTRGDLWISWESGVRVFD ELLLDADFSVNAGSW  
MWLSCSAFFQ QFFHCYCPVGFGRRTDP SGDYVKRYLPKLKGFP SRYIYEPWNAPESVQKAAKCIIGVDYPKPM  
VNHAETSRLNIERMKQIYQQLSRYRGLCLLASVPSCVEDISGPVADSASGQGCSTSTAMRLSQADQASPKRKH  
EGAEELCTEELYKRAKVTCLPAPEIPGKS

>Ciconia\_magu\_\_NXJ33894.1

DNWAFLYAQRLALKQELPLHVCFCCLVPKFLDATIRHYGFMLRGLQEVAEECAELNVPFHLLLLGYAKDVLPTFV  
VEHGVGGLVTDFCPLRLPRQWVEDVRERLPEDVPPFAQVDAHNIVPCWVASPKQEYSARTIRGKIHAQLPEFLT  
EFPPVIRHPYPSPCAEPIAWEACYSSLQVDRVTKEVEWATPGTAAGLAVLQSFVAERLKSFGSHRNDPNKAA  
LSNLSPWFHFHGGVSTQRAILEVQKHRGKYKESVDAFVEEAVVRRELAENFCYYNENYDSVQGAYNWAQTTLKL  
HAKDKRPFLYELQELEQGTTHDPLWNAQLQMVREGKMHGFLRMYWAKKILEWTRSPEEALRFAYLNDRYEL  
DGRDPNGYVGKLQDGGMGWGGCLWSICGIHDQGWAERAI FGKIRYMNYAGCKRKFDVGQFERRYAP

>Ciconia\_magu\_\_NXJ34657.1

MLHRTIHLFRKGLRLHDNPTLLAALESSEVVYPVYILDRTFMTSMMRIGALRWHFLLQSLEDLQKNLCQLGSC  
LLVIQGEYESVLRDHVQKWKITQVTLDAEMEPFYKEMEANVRRLGEELGFEVLSLVGHSLYDTRKILDLNGGT  
PPLTYKRFLHILSLLGDPEVPVRNPTAEDFQRCRPPDPLAECYRVPLPVDLKI PLESLSPPWRGGETEGLQRL  
EQHLTDQGWVASFTKPRITIPNSLLPSTTGLSPYFSMGCLSVRAFFYRLSNIYAQAKHHSLLPPVSLQGQLLWRE  
FFYTVASATPNFTKMAGNPICLQISWYEDAERLHKWKMAQTGFPPWIDAIMTQLRQEGWIHHLARHAVACFLTR  
GDLWISWEEGMKVFEELLLDADYSINAGNMMWLSASAFFHQYTRIFCPVRFGKRTDPEGQYIRKYLPLVKNFP  
SKYIYEPWTASEEEQKQAGCIIIGQDYPFPMVNHKEASDHNLQLMKQVREEQYRTAQLTRDDTDDPMEMKVKRD  
QSEENVSKGKVARMTTE

>Ciconia\_magu\_\_NXJ37697.1

KVDYDVCSSNYGNWLYSAGIGNDPRDNRKFNMIKQGLDYDGNNGDYVRLWVPELQGIKGADIHTPWALNSAALSQ  
AGVTLGETYPQPVVTAPEWSRHINQGPQGRSPHPRGRRGPAHTPMQHKDRGIDFYFSSHKKDV

>Ciconia\_magu\_\_NXJ40253.1

RFLQLQLEDLDANLRKLNLSRLFVIRGQPADVFPRLFKEWNIAKLSIEYDSEPFGKERDAAIKKLASEAGVEVI  
VRISHTLYDLDKIIELNGGQPPITYKRFQTLISRMEPLEMPVETITPEVMEKCTTPVSEDHDEKYGVPSLEEL  
GFDTDGLPSAVWPGGETEALTRLERHLERKAWVANFERPRMNANSLASPTGLSPYLRFGCLSCRLFYFKLTD  
LYKKVKKNSSPPLSLYGQLLWREFFYTAATNNPRFDKMEGNPICVQIPWDKNPEALAKWAEGRTGFPPWIDAIM  
TQLRQEGWIHHLARHAVACFLTRGDLWISWEEGMKVFEELLLDADWSVNAGSMMWLSLSCSSFFQQFFHCYCPVG  
FGRRTDPNGDYIRRYLPVLRGFPKAKYIYDPWNAPESVQKAAKCIIGVNYPKPMVNHAEASRLNIERMKQIYQQ  
LSRYRGLGLLATVPSNPNGNGGGLMGYSPPGESISGCGSTGGAQLGTGDGHTVVQPCALGESHTGASGIQQQG  
YCQASSILQYAHGDSQQSHLLQAGRTALGTGISAGKRPNPEEETQSVGPKVQRQSTN

>Circaetus\_pect\_\_NXW12461.1

RFLQLQLEDLDNSLRKLNLSRLFVVRGQPTDVFPRLFKEWGVTRLTFEYDSEPFGKERDAAIVKLAKAGVEVV  
IENSHTLYDLDRIIELNGHKPPLTYKRFQAIISRMEPLPKPVSTVISQQMETCKVDIQENHDDVYGVPSLEEL  
GFPTDGLAPAVWQGGETEALARLDKHLERKAWVANFERPRMNANSLASPTGLSPYLRFGCLSCRLFYRLWE  
LYKKVKRNSTPPLSLYGQLLWREFFYTAATNNPKFDRMEGNPICIQIPWDRNPEALAKWAEGKTGFPPWIDAIM  
TQLRQEGWIHHLARHAVACFLTRGDLWISWESGVRVFDELLEDADFSVNAGSMMWLSLSCSAFFQQFFHCYCPVG  
FGRRTDPNGDYVRYLPKLGKGFPSRYIYEPWNAPESVQKAAKCIIGVDYKPMVNHAEASRLNIERMKQIYQQ  
LSRYRGLCLLASVPSCVEDLSGPVTDASAGQGCSTNTAMRLSQADQASPKRKHEGAEELCTEELYKRAKVTGL  
PTPEIPGKSL

>Circaetus\_pect\_\_NXW13967.1

MQHSSIHWRKGLRLHDNPALLAAATDCRHLHPLFILDPSSSQAGTNAWRFLLDALQDLGSLREMGSRLFVV  
QGCPEEVFPRLFHAWGTTRLTFEVDTEPSAKKSDAVAELAERHGVVEVKKVSHSTLYDTRKVLALNDGKAPLT  
YKGLQSLLASLGPPEKPAPTLTLEHLQGCHTPCQVSHDTEYRVPTLEELGQDPTEVGPPLYPGGETAALTRLN  
ALMDRTAWLCSFKKPETEPASLSPSTTVLSPYLKFGCLSVRTFWWWLDEVYQGOQREHSQPPVSLHGQLLWREF  
FYTAGAGIPNFDPMVGNPICLQVDWDNNPQHLRAWREGQTYPFIDAIMTQLRTEGWIHHLARHAVACFLTRG  
DLWISWEEGLKVFEELLLDADWSLNAGNWLWLSGSAFFHRYFHIYSPVAFGKKTDGAYIRKYLPIKDFPA  
KYIYEPWKAPRAVQEQAGCLVGTHYPQPIVEHGAASKRNLGRMKAAQAQK

>Circaetus\_pect\_\_NXW15569.1

AQLSLLFSSSVLKVDYDVCSSNYGNWLYSAGIGNDPRENRKFNMIKQGLDYDGNNGDYVRLWVPELQGIKGADIH  
TPWALNSAALSQAGVTLGETYPQPVVTAPEWSQHINQKPQGRSPHPRGRRGPAHTPMQHKDRGIDFYFSSHKKD  
M

>Circaetus\_pect\_\_NXW19350.1

MPHRTIHLFRKGLRLHDNPTLLAALECEVVYPVYILDRKFMTSVMHIGTLRWHFLLQSLEDLQKKLCQLGSC  
LLVIQGEYESVLRDHIQKWNITQVTLDAEMEPFYKEMEANIRRLGEELGFEVLSLVGHSLYNTKRILDLNSGT  
PPLTYKRFLHILSLLGDPEVPVRNLTAEFDQKCRPPDLGLAECYRVPLPVDLKI PAESLSPPWRGGETEGLQRL  
EQHLTDQGWVASFTKPRITIPNSLLPSTTGLSPYFSMGCLSVRTFFYRLSNIYAQAKHHSLLPPVSLQGQLLWRE  
FFYTVASATPNFTKMAGNPICLQISWYEDAERLHKWKTAQTGFPPWIDAIMTQLRQEGWIHHLARHAVACFLTR  
GDLWISWEEGMKVFEELLLDADYSINAGNMMWLSASAFFHQYTRIFCPIRFGKRTDPEGQYIRKYLPIKKNFP  
SKYIYEPWTATEEEQKQAGCIIIGQDYPFPMVNHKEASDHNLQLMKQVREEQYRTAQLTRDDTDDPMEMKVKRD  
HPEENVSKGKVARMTTE

>Cloeon\_dip\_CAB3360699.1\_protein

MFTNKLTQQTNLLTQQLTTIFLTRIFSLSVANSFIRQSRMASGPKKLKLGESSKPINNDAFFTEINEARAKA  
GKSVMDFKFNKKRIKVLSKASDVPEECKGIVYWMSRDQRVQDNWAFLEAQLAIKNKVPLHICFCLLSKFLGA

PFRHFKFMLDGLQEVQQECKKLEIQFHLLEGEAASVLPAFIKAHDIGGVVIDFSPLRTHRSWVDELKKKLPST  
VPLCQVDAHNIVPCWVASDKLEYGARTIRKKVMDKLPFLTEFPLVAKHEYPAKFKAEPIDWTAVEEKELEVDR  
SVGPFVSWAKPGSEAGLAMLNEFCKRIKLFSGSKRNDPNINALSNLSPWFHFGHLSVQRAIKYVQFKSSHSES  
VAAFVEEAVVRRELSDNFCMHNPKYDSIEGTNNWAKETLEVHKKDKREYIYSLEQFDQAKTHDDLWNSAQLQM  
VREGKMHGFLRMYWAKKILEWTESPEQALEFAIHLNDKYNLDGRGPQWICWLHVVDLHRSPGLGREASVWQD  
SLHELPLGLQTQV

>Cloeon\_dip\_CAB3360724.1\_protein

MSGTETGTRSPPHA EKHTVHWFRKGLRLHDNP SLLEGLRAATTFRCVFILDPWFAGSSNVGINKWRFL LQCLE  
DLDRSLRKLNSRLFVIRGQPADTL PKLFKEWGTTCLTFEEDPEPFGRVRDQ NIMTLCKELGLSVVSRISHTLY  
DLEKILEKNN GKPLTYHQFQNVVASMDSPQPEPMVTLDTLRGCWTP LTEDHDDKYGVPSLEELGFDTEGLL  
PPVWRGGESEALARLERHLERKAWVASFGRPKMTPQ SLLASQTGLSPYLRF GCLSTRLFYYQLTDLYKKIKKA  
APPLSLHGQLLWREFFYCAATKNPNF DKMAGNPICVQIPWDKNPEALAKWANGQTGF PWIDAIMTQLREEGWI  
HHLARHAVACFLTRGDLWVSWE EGMKVFEELLLDADWSVNGGMMWLSCSSFFQ QFFHCYCPVRFGRKADPNG  
DYIRRYLPVLKNFPTKYIHEPWN APEAVQRAAKCIIGKDYAVPMVNHA IASRINMERMKQVYQQLSKYRGAGL  
LATVPSSQNGAIPPSEPLHSVT TSLGSLPNMNLKQSSLSPPKDKHRSKSPGAPMLPPARPQQHHSNQQQQQQ  
IGDCHFQKQSGI

>Cloeon\_dip\_CAB3366165.1\_protein

MSRGTVIHWFRKGLRLHDNPALLEAIRECEKQPEVIKELRPIFILDPLILDHMRVGP NRWRFLQQSLSNLDDR  
LKALGSALLVIRGKPEEVFPKLFKTWNVKCITFENDIEPYAKKRDEQIEAMAKDAGIKVIQKVSHTLYSPAKI  
LNANMGKVPLTYQKFVSVAEGLGPPPAAVDEPKKVP PGYSQILESRELKIPKEEDIFGNTNVPTLEELGLDES  
KLEPCLYPGGEAEALQRMQICLAKKAWICDFEKPNTSPNSLIPSTTVLSPYLKFGCLSPRLFFHEL NKI IQGR  
KHSKPPVSLVGQMYWREFYVVG FATPNYDRMVGNSICCCQIPWGNNQ EHLKAWTEGRTGYPFIDAIMTQLRKE  
GWIHHLARHAVACFLTRGDLWISWEEGQKVFEELLLDADWALNAGNMMWLSASAFFHQYFRVYSPVVF GKKT  
KFGDYIKKYLPIKKYPVEYIYEPWNAPLSVQKAAGCIIGTDYPRPIVKHEVVSKENIAKMNAAYKANKANG  
EAGKSKSSAAGGSSAKQAKKR

>Cloeon\_dip\_CAB3385983.1\_protein

MRIQCIGRSPPHARVIVPREAPVTWTATYAPALGAPV IQQRQWPTMNRPVQMSVLWFRHGLRLHDNPALLDAI  
SGPPSMFFPIFIFDGESAGTKVIGFNRMRFLLES LADLRQLRSRGGRLWLLRGDPSKIFQRLWEELALTKVC  
FEQDCEPIWNERDQSVRATCAERGVRCEE FVSHTLWDPKAVIYANGGLPPLTYQMFLHTVSTLGEPPRPVEDP  
DWTGVTFGTLPPRLVKEFQVFDEV PKPEYFGLSQPGYGLVRWIGGETRALQHLRERLTQEEQAFRKGII LPNQ  
SRPDL LGPPTSQSAALRYGCLSVRRFYWN LHDLFNAVSQGDPPAGLNISGQLIWREYFYTMSVYNPHYAEMSA  
NPICLDVPWDKNPTFLEKWKKGQTGF PFIDAAMRQLVSEGWIIHVARNSVACFLTRGDLWISWEDGLAFFLEH  
LIDADWSVCAGNMMWVSSSAFEQLLDCSKCLCPVNYGRRLDPWGEYIKRYVPELRNL PVEYLYEPWKA PLDVQ  
RDAGCIIGDHYPERIVDHQRASNQNRQVFQLIEGFNNDFNIK

>Clonorchis\_sin\_GAA29131.2\_photolyase

MSGASNWLKQIEQQLNAATSVTTFKFSKARVRQLKGPDEFFPAEANS GGVLVWMIRDQRVQDNWAFLYAQRLA  
LKQVPLHVCFLVPCYQADTLRHFSFMVGGLTQVEQE CRALNIHFHLLNIADGLSPSTRSQGSKHRWAEEDS  
QALQPPDLYGSQVAEQ LKSLVQTLNIGCIVTDFSPLRAPTMWIEHVRTQLPPQLPFCQVDAHNIVPVWCGSDK  
CEFSARTIRPKLYEQTGQFLTEFPPLIKHPFSCSAPT CRKTVNWNKIRENYWGDCTVQPV DWAKPGTAAAFYV  
LRSFIDERLRDFDAHRNDPANPALSGLSPWFHFGQMAPQRAVLEVAALQH KYGRSVDVFIEEAFNRRELADNF  
CFHTPLYDRLQGARQWAQDTLHKHAEDKRDVAFTRAQLESSGTTDDLWNA AQRLVQTGKMHGFLRQYWAKKI  
LEWCADGPEVAIQWAIYLNDRYSLDGTDPNGYVGIMWAICGVHDQGWPERRIFGKVRYMCYNGCRRWFSVPTF  
VSRFSDA

>Clunio\_mar\_AFS34617.1\_cry\_2

MPDPNQLPKKEKHIVHWFRKGLRLHDNPALREGLKNATTFRAVFFVDPWFAGSSNVGINKWRFL LQCLEDL DQ  
NLRLNSRLFVIRGQPAEKL PMLFKKWNTTCLTFEEDPEPF SKVRDNNITEMCKELNIEVISAVSHTLYKLEK  
IIEKNNGKAPLTYHQFQAI IASMEPPPPAEATIAEDIIGNTRTPIDDDHDDRYGVPTLEELGFDTEGLK PPIW  
IGGETEALARLERHLERKAWVASFGRPKMSPQSLLASQTGLSPYLRF GCLSTRLFYYQLTDLYKKIKKTC PPL  
SLHGQLLWREFFYCCATKNPNF DKMSGNPICVQIPWDKNPEALAKWANGQTGY PWIDAIMSQLREEGWIIHLA  
RHAVACFLTRGNLWISWEEGMKVFEELLLDADWSVNAGMWLWLS CSSFFQ QFFHCYCPVKFGRKADPNGDYIR  
KYIPALKNFPTKYIHEPWVASEAIQRTAKCIIGKDYLP MINHVIASRNNMGRMKQVYQQLAKYRQTPNNPEF  
GGS AISNILAKAQASAKAFTEQQSSSPSTTILKTVNNSGNYMCSQRS DHIEMPPQTVLYHEPSLNASSSVLQ  
QQNM MKHRNNTNDMCHQQENINEFQYDE DGTSHHNSYNYSQKQMTALNETQQQEDQHTIEFRMNNLGNEDTG

>Clunio\_mar\_CRK90905.1\_CLUMA CG00

MTKSVLWFRQGLRLHDNPALIEAINTDDGRRQVTFYPVFIFDGESAGTKDVGYNRMKFLLES LLDLDEQFKQL  
GAPGLFIFQGKPT EIFQNLHDNIGINKICFEQDCEYNERDNEIKYLSREL GIEVVEKVSHTLWNPEDIIRING  
GFAPLTYQMLLHTVNV LGLPPRPVNNEVDFSQVNFGTIPEHHKINLRLMKSI P SPEDFLIFPENTGSDVYVNW  
NGGERHALEQ MIDRVKHEEEAFASGTYLPNQANVDLMGSPKSMSAALRFGCLSVRRFYTYI HDKFNEVQDKMV  
YKLPGGHHITGQLMWREYFYTMSINNPYYGQIKNNPICLNIPWKSSEED EILKWKQGR TGVP IIDASMRQLLA  
EGWLHHTLRNL TATFLTRTGLWISWEVGLQHFLKYLLDADLPICGGNMMWVSSSAFETLLDSSRCSIISLAHR

LDPKGEYIKRYVPELRNPFPMKYIHEPWRAPIIDIQEDIECIIGQDYPSPMIDIVQALQINCNRMKKIRESLIES  
QPHVRPSNEDEIRTFFFWIADEIAIQCN  
>Clunio\_mar\_CRL02690.1\_CLUMA.CG01  
MSKRQTAIHWFRKGLRVHDNPALATAVNEAIKRDILLRPMFMLDPTIIQWLKVGPNRWRFLQQTALADLDKNLR  
KLNTKLFVVRGNPKEDFIKLFKEWNVILLTFESDIEPYSVDRDATVIKAAQFHFIEVIQECSHITFNPELVVK  
RNGGSAPLTYQKFLSVASSIKVPSPVEFPKLPASSLPVNDHYEEKDENCYDVPTLKEGLNEKDLGSCQFPG  
GESEALSRMEMNLKRKKWICDFEKPCTSPNSLEPSTTVLSPYLKFGALSSRLFYKRLKEVYKGSKHSNPPVSL  
EGQIMWREFYYTVAATTPNFNKMVGNRVCAQIPWVKNQKYLEAWSFGRTGYPPFIDAIMRQLRQEGWIHHLARH  
AVACFLTRGDLWCHWEEGQKVFEELLLDADWALNAGNWMWLSASAFFHQYFRVYSPVAFGKKTDSEGKFIKKY  
VPELKNFPSGIIYEPWKASLENQNKYGCIIIGKDYPNRIVDHDIVMKENLVKMKAAAYAKKKKFKR  
>Clunio\_mar\_CRL08549.1\_CLUMA.CG02  
MKRFLFTNDQQSSSKTKTENSSSDFVISIQNNRLKTAESIRDFKFNKKRVKILSKVEDVAEKSNGIAYWMAR  
DQRVQDNWALLFSQNLAIKNKIPLHVVFCLTDGFLGATIRHFDFMLKGLEEVANDCTTLNINFHLLRGEHTKE  
IPKFIKNNKIGAVVCFDSPLRIHRSWVDGIKKELPPYVPLVQVDAHNIVPIWITSQKQYEAARTIRNKINSKL  
GEFLTEFPPLVKHPHKSTEMPDKIDWKKTLQSLKVDETVGVVDWIKPGYKNAVEVLETFINKRLKVFATKRND  
PTINALSNLSPFFHFGQISVQRAIIEVQKHKSAAKDSVDAFCEEAIVRRELSDNFCFHNKNYDNLGDITDWA  
ITLNAHRKDKRPYLYTRDELEKSKTHDDLWNAAQNLRLVEAKLHGFLRMYWAKKILEWTASPEEALETAIYLN  
DRYNLDGRDPNGYVGCMMWSIGGIHDQGWGERAVFGKIRYMNIEGCKRKFDIKAFIARYGGVVHKKK  
>Clupea\_hare\_XP\_012677759.2  
MVVNSVHWFRKGLRLHDNPALQEALNGADTVRCVYILDPWFAGSANVGVNWRWFLLLETLEDLDSLRLKLSRL  
FVVRGQPTDVFPRLFKEWNI TRLTFEYDSEPYGKERDGAIIKMAQEFQVETVQNSHTLYNLDKIEMNNNR  
PLTFKRFQAIVSRLPLPRKPLPTITPEQMDSCRIKIADNHDEHYSVPSLEELGFRNVSPPEAVWRGGETEAL  
RLNKHLDKRGWVSNFERPRINMLSLLASPTGLSPYLRFGCLSCRVLYYNLRDLYMTLRKRCSPLSLFSQLLW  
REFFYTAATNNPNFDRMEGNPICVQIPWDNNPEALAKWAEGRGTGFPWIDAIMTQLRQEGWIHHLARH  
TRGDLWISWESGMKVFEELLLDADHSVNAGSWMWLSCSAFFQQFFHCYCPVGFGRRTDPNGDFIRRYIPKLK  
YPNRYIYEPWNAPEVQKAANCVVGVDPKPKMINHAEGSRLNIERMKQVYQQLSHYRGLSLLASVPTIQEEVE  
PSLSDDSQASGSSTPGAQRTSGGMKEVSTAAPAVVTSSSTASPPATSALTQRKRWPTELQSDQCCSQSKVQH  
TSNSPASQE  
>Clupea\_hare\_XP\_012696746.2  
MPVENDSSVAQVRHLLRELLVGREDPGGFFCLCLSLILGSRETRAGFRELIAPLTDKHRQLHSQ LITIIYQEYFS  
REEDDELRLAPQDEDELQALALSLVHTSCQNSPRQVPRSYAQLASAMPVKGPQGVDTQKSMGTHKPAGR  
VGERSPNGLKEPGATRPAAATANEGRTDSSLANDSDSQEKLSNDQSEKSRKSRRRRQRKQQQQLLKSPSSPRP  
ILLWFRDLRLLDNPALIGCLELGAPVIPVFLWNAQEEEGPGVTATGGACKYWLHQAALVCLNEALERIGSHL  
VTVKAEPSSSEALQRLVEETGAGAVVATALYEPWLKERDEGVFNTLQHRLSCHLYHSYCLQDPYTVTTQGVG  
LRGIGSVSHTSCCQONPTGPGSAPQDAPRTLVPVSAWPAGCPLEQLGLARMPRRKDGTMVDWAVNIRRDWDF  
TEEGAHARLEAFLQDGVRRYEKESARADAPNTSCLSPYLHWGQLSVRWLLWDARGARCRSPKFQRKLAWRDLA  
YWQLTLFPDLPWESLRPPYKALRWSSERAHLHAWQRGRTGYPLVDAAMRQLWQTGWMMNYMRHVVASFLIAYL  
HLPWQEGYRWFDTLVDADVAIDAMMWQNGGMSGLDHWNFVMHPVDAAMTCDPNGTYVVRWCPELAPLPDELI  
HKPWKCPASILRRAGVVLGQNYPERVVTDLLELRTQSLRDVAEVRRRFSEYVDQHSGCDLIPLPDRLVEEALG  
STGEVLRSGSRFLLPVITRMEFKHQSVEPDAAEGRVNPYNAVLKGYVSRKRDETVAFLNERDFMASVVHEGTQ  
RLERAERNQRLLEGLPAPPSATRGRPRRTPTMPQR  
>Clupea\_hare\_XP\_031416103.2  
MAPKKADLKRKAKSVKISNAKQLKVDREGEWLEGEVAEVRRAQDVKFNEKRLRFLSDTKTVIRGTEGVVYWM  
GRDQVRQDNWALIYAQQALAEELPLHICFLMPNFLEATFRHYSFMLQGLQEVAKESSVLDIQFHLLSGFP  
DTLPGFIKEWNMGAVVTDWFPLRDPTRWVDDVKKAISPDIPIQVDAHNVPWCWEASGKLEYAARTIRGKITK  
LLPTFLTEFPAVDKHPHSSPKTAQAVNWEILSSLGVDRCVGEVDWAKPGTSGGMAMLESFIDERLHCFATLR  
NNPNVAAASQLSPWIHFGQLSAQRVVRQVQKNGKKFSESVASFTEEMVVRRELADNFCFYNNYDKIEGAYEW  
ARKTLKDHAKDRSHIYTREQLEQAKTHDKLWNAAQTLLEIGKIHGFMRMYWAKKILEWTSSPEEALSIAIF  
LNDYSLDGCDPNGYVGCMMWSICGIHDMGWAERPVGKIRYMNIDGCKRKFDVAQFERLYSKMG  
>Clupea\_hare\_XP\_031420090.1  
MVVNTVHWFRKGLRLHDNPRLDSIRGADTLRCVYILDPWFAGSSNVGISRWRFLLQCLEDLASLRKLNSRL  
FVIRGQPTDVFPRLFKEWNI NLSYEYDSEPFGERDAAIQKLASEAGVEVTVRISHTLYDLDKI IELNGGQS  
PLTYKRQFTLISRMDVVETPVDAITPELMERCLTPLSDDHDDKFGVPSLEELGFETDGLSTAVWPGGETEALT  
RLERHLERKAWANFERPRMNANSLASPTGLSPYLRFGCLSCRFLYSKLTDLYRKVKNSVPPLSLYGQLLW  
REFFYTATANNPRFDKMDGNPICVQIPWDRNPEALAKWAEGRGTGFPWIDAIMTQLRQEGWIHHLARH  
TRGDLWISWEEGMKVFEELLLDADWSVNAGSWMWLSCSSFFQQFFHCYCPVGFGRRTDPNGDFIRRYLPILRG  
FPAKYIYEPWNAPEAVQKAAKCIIGVHYPKPMVNHAEEASRVNIERMKQIYQQLSCYRGLELLATVPSNSSGAA  
DGTAAGDGNQEGTTTSGRSLMVHQVPALTQGEQVGTGTPAGTRGEPYHTDTSHHQQQQQQQQQQQVFLMGETA  
ASHRQQAQT TTSQRVRGPMKRPTEDIASRSKIQRQSIH  
>Clupea\_hare\_XP\_031423160.1

MSHRTIHLFNRGLRLHDNPTLVAALESSAAMYPVFLLDRAFMEGSVRMGALRWRFILQSLLEDLHHS LQRLGSR  
LYVIQGSHEAVLRLVAQWGITQLSFDDEVEPHYKQLDKELRTLASELSLSVLSCVAHS LYDVKRI I KANSQ  
PPLTYKKFLRVLSVLGEPDTPAREITETDFQKCPTPGDEEGE EEPYKVP SLSELGFEVEYEVLPWPGGESHALKR  
LEKHFQSQGWVANFSKPR T I P NSLLPSTTGLSPYLSLGCLSVRTFYHRLSKVYAQSKNHS LPPVSLQGQVLWR  
EFFYTVA SATPNFTRMVGNPICLQIDWYEDPQALHKWKMGQTGF PWIDAIMTQLRQEGWVHHLARHAVACFLT  
RGDLWISWEKGMKVFE EYLLDADYSLNAGNWMWLSASAFFHRYTRIFCPIRFGRRTDPDGHYLRKYLPVLKNF  
PSKYIYEPWTAPEHVQHQS GCIIGKDYPLPMVNHL EASQRNLALMKELRIEQENTADLTRDMADDPMEVGVKR  
KLPEDTIAQRDATEYNSSVPVGNKRCSSPDESSWTPDPVRLPEMSSKV

>Clupea\_hare\_\_XP\_031440209.1

MSSSRTIICLLRNDLR LHDNEVFHWAQKNAEHIVPLYCFDPLQYL GTHCFNF PKTGPFR LRFLLD SVHDLRAS  
LKKRGSNLVVR CGKPDQVVDLIRQLG SVTAVAFHEEVTQEELEVEKQIKDVCSKNKVQV SFWGSTLYHKHD  
LPFNHISRLPDVYTQFRKAVESQARVRPVLSSPTQLRPLPLGLEEGSIPTYKDLEQTEPVADPRSAFPCSGGE  
SEALARLQHYFWD TDAVATYKETRNG LIGIDYSTKFS PWLAMGCISPRYIYEQIKKYERERTANQSTYWVIFE  
LLWRDYFKFVAMKYGNR LFN LNLGLQDKHPWK TDSKLLDAWKEGRTGVPFVDANMRELALTGFMSNRGRQNV  
SFLTKDLGLDWRMGA EWF EYLLVDHDVCSNYGNWLYSAGIGNDPREN RKFNMIKQGLDYDNNGDYVRQWVPEL  
RGIKGGDVHTPWALSSAALSHAKVSLNDTYPSPV VMAPEWNRHV NKKPVGASGSSSRGRKGPSHTHKQHKDRG  
IDFYFSKSKGLNASND

>Clupea\_hare\_\_XP\_042562756.1

MTHNCIHWFRKGLRLHDN PALTAALRDCKQLYPVFI LDPWF PNN TKIGINRWRFLIGALKDLDCSLRKLNSRL  
FVVRGKPD EVLPELFRKWKITRLTFEVDTEPYS LQORDMEVLKLAGDHGVEVIQKISHTLYNLERI IDENNQKA  
PLTYVRFQTVL KSMGLPKRPVPSPLENMKG VITPCTDKHENYGIPTLEELGQDPELAIPEVFPGGEQEALKR  
LDKYM DKPGWVCSFEK PQTSPNALTPSTTVLSPYVRFGCLSARTFWRLSDVYQ GK KHSQPPVSLHGQLLWRE  
FFYTAA LGVPNFNKMEGNPVCVQVDWDDKPDHLAAWREARTGFPFIDAIMTQLRQEGWIHHLARHAVACFLTR  
GDLWISWEEGQKVFEELLLDADWALNAGNWQWLSASAFFHQYFRVYSPVAFGKKTDKHGDYIKKYLP LLKKFP  
DQYIYEPWKAPRSIQERAGCIVGKDYPRPIVEHEIISKKNIQRMKAAYAKRSPQTAESPSKGKGVKRKRESIK  
DMLTKKKKKSD

>Coccinella\_sept\_\_XP\_044750690.1

MTDNETSDITSHIHHHRMASIKDKHTVHWFRKGLRFHDNPAMLEGLKNSKTFRCVFLDPWFAGSSNVGINKW  
RFL LQCLDDLDNNLKNLNSRLFVVRGQPADALPKLFKEWGTT CFSFEEDPEPFGQVRDKNI IALCNE LGITVI  
QRPSHTLYDLDKIIEKNGGTAPITYHQFLEVISSMGS PSEPLTPFDSVSSNQLNTPFTNDHDHEFGVPTLEQ  
LGFDTKTLSAAVWNGGESEALRRLERHLERKAWVASFGMPKMT PQSLLSSQTGLSPYLRFGCLSTRLFYYRLT  
ALYKKIKNAFPPLSLHGQLLWREFFYCAATRNP NFDKMLGNPICVQIPWDQNAEALAKWANGQTGF PWIDAIM  
TQLRQEGWIHHLARHAVACFLTRGDLWISWEEG MKVFEELLLDADWSVNAGTWMWLS CSSFFQQFSHCYCPVK  
FGRKADPNGDYIRKYICVLRNMP IKYIHD PWTAPDNVQKAAKCVIGKDYPLPMVNHS LVS KINI QRMKQVYRQ  
LKSYS ENNDEFGTQITENCKNSCQYVQTDK

>Coccinella\_sept\_\_XP\_044764764.1

MAPNV LKDLAKEIFAKNIATQRSEAGKSIKEFKFKKDRCLLSKYEDLREDSKGIIYWMSRESRVNDNWALLF  
AQKLCFKYEVPLHVCFFLDDYKELYPTTRQAGFLRKGLEHVRKDLEKLNIPFYLLKKS PLELVDI IQANDIGC  
LVCDFFPLRIVTNWQEK LKELLPSNVAIVQVDAHNI VPCWIASDKLERAARSIRPKILKQLPTYLTEFFAVSK  
QKEKKELVIKPGLEWSKNDKLDIEFVEEITWAEPEGEEGGIEMLR TFLLERLQYYGISSNEPSKKHQSNLSPWL  
HFGQISAQRIALEVSKLKKTTWTQ CERFLEEAIIRKEICDNFCLYNP NYDSFEGADK WAKETLNLHRDDKRDF  
LYTPEQFENCLTHDPIWNSAQFQLVTEGKLQGYMRMYWCKKILEWTESPEKAIKTALWLN DKYSIDGSDPNGF  
VGVMWSICGIHDQGFKERP VFGKIRFMVDYLSRKYDIKTYCAKYRPNAKVSGNITKYLQTSNKKNE DKEDS  
KSPNKTEGKNGKNKETETEDKV KPAKQSSDKSCGKKRTVKSETHEESKKKRKV

>Colius\_stri\_\_KFP26438.1

RFL LQSLLEDL DNSLRKLNSRLFVVRGQPTDVFPRLFKEWGVTRLTFEYDSEPF GKERDAAIVKLAKEAGVEVV  
IENSHTLYDLDR I IELNGQKPP LTYKRFAQIISRMELPKKPVSTVISQOMETCKVDIQENHDDVYGVPSLEEL  
GFPTDGLAPAVWQGGETEALARLDKHLERKAWVANYERPRMNANSLLASPTGLSPYLRFGCLSCRLFYRLWE  
LYKKVKRNSTPPLSLYGQLLWREFFYTAATNNPKFDRMEGNPICIQIPWDRNPEALAKWAEGKTGF PWIDAIM  
TQLRQEGWIHHLARHAVACFLTRGDLWISWESGVRV FDELLDADFSVNAGSWMWLS CSAFFQQFFHCYCPVG  
FGRRTDP SGDYVKRYLPKLKGFP SRYIYEPWNAPESVQKAAKCIIGVDYPKPMVNHAETSRLNIERMKQIYQQ  
LSRYRGLCLLASVPSCVEDLSGPVSDSASGQGCSSSTVLRLS QADQASPKRKHEGA EELCTEELS KRAKV TCL  
PAPEIPGKS

>Colius\_stri\_\_XP\_010202269.1

MSHRTVHLFRKGLRLHDNPTLLAAVESSQILYPVYI LDREFVTSVMHIGALRWHFLLQSLQDLQKSLCQLGSC  
LLVLQGEYEPVLKAHIQKWNITQVTLDAEME PFYKEMESNIRRLGEELGFEVLSLVGHS LYD TKRILELNGGS  
PPLTYKKFLHILSL LGDPEVPVRNLTAEDFQRCRPPDLGLAECYRVPLPVDLNI PLESLS PWKGGETEGLQRL  
EQHLTDQGWVAHFTKPKTIPNSLLPSTTGLSPYFSVGCLSVRTFFYRLSNIYAQAKHHS LPPVSLQGQLLWRE  
FFYTVA SATPNFTRMVGNPICLQIPWYEDA EKLHKWKTAQTGF PWIDAIMTQLQQEGWIHHLARHAVACFLTR

GDLWISWEEGMKVFEEMLLDADYSINAGNWMWLSASAFFHQYTRIFCPVRFGKRTDPEGKYIRKYLPIILKNFP  
PKYIYEPWTASEEEQKQAGCIIGQDYPPFMVNHKEVSDHNLQLMKQVREEQQRQAQLTRGESCCRDCHQPQGS  
>Colius\_stri\_\_XP\_010202766.1  
MRFLQLCKDLNLRKLNLSRLFVIRGQPADVFPRFLFKEWNIAKLSIEYDSEPFGERDAAIKKLASEAGVEV  
IVRISHTLYDLDKIIELNGGQPPLTYKRFQTLISRMEPLEMPVETITPEVMEKCTTPVSDDHDEKYGVPSLEE  
LGFDTDGLPSAVWPGGETEALTRLERHLERKAWVANFERPRMNANSLLASPTGLSPYLRFGCLSCRLFFYFKLT  
DLYKKVKKNSSPPLSLYGQLLWREFFYTAATNNPRFDKMEGNPICVQIPWDKNPEALAKWAEGRGTGFPWIDAI  
MTQLRQEGWIHHLARHAVACFLTRGDLWISWEEGMKVFEELLLDADWSVNAGSWMWLSCSSSFFQQFFHCYCPV  
GFGRRTDPNGDYIRRYLPVLRGFPKAYIYDPWNAPEVSQKAAKCIIGVNYPKPMVNHAEASRLNIERMKQIYQ  
QLSRYRGLGLLATVPSNPNGNGNGGLMGYSPGESISGCGSSGGAQMGTDGDGHTVVQPICALGDSHSGGASGIQQ  
QGYCQASSILHYAHGDSQQSHLLQAGRTALGTGISAGKRPNPEEETQSVGPKVQRQSTS  
>Colius\_stri\_\_XP\_010206669.1  
MAGTTRTAICLLRCDLRAHDNQVLHWAQSNADFVIPLYCFDPRHYVGTHCYGFPKTGPHRLRFLLESVKDLRE  
TLKKKGSTLVVRKGKPEDVVYDLITQLGSVSAVAFHEEATQEELDVEKGLCQVCSQHRVKVHTFWASTLYHRD  
DLFFRPIARLPDVFTHFRKAVESEAKVRPTLQLAEQLKPLTPGVEEGPIPTIEDLGQKDPVAEPRTAFPCSGG  
ETQALMRLQYYFWDTNLVTSYKETRNLVGM DYSTKFAPWLALGCISPRYIYKQIQKYEKERTANESTY  
>Colius\_stri\_\_XP\_010206798.1  
GEKEEEEEKEAVHEARRRTAPSVREFKYNNKRVRLVSQGDDLKEDARCILYWMSRDQRVQDNWAFLYAQRALAK  
QELPLHVCFLVPKFLDATIRHYDFMLRGLQEVAKECEEELNIPFHMLLGYAKDVLPTFVVEHGVGGLVTDFCP  
LRLPRQWVEDVRQLRPEDVPFAQVDAHNIVPCWLASSKQEYSAWTFRGKINTQIPEFLTEFPPIIHHPPYPPSC  
LAKPIDWEACYSSLQVDRTVKAVEWATPGTAAGLAVLQSFISQRLKSFGAHRNDPNKEALSNSPWFHFQGV  
TQRAILEVQKQRSKYKESVDVFVEEAVVRRELSNFYNDKYDSVQAAYSWAQTTLKLHAKDKRPFLYKLEE  
LEQGTTHDPLWNAAQLQMVREGKMHGFLRMWAKKILEWTHSPEEALQFAIYLNDRYELDGRDPNGYVADAGC  
LWSICGIHDHGWTERAVFGKIRYMNYAGCKRKFVDQFERRYAPQTLSQ  
>Colocasia\_esc\_hypothetice\_MQM01560.1  
MASTNPTSLLPCTPTQEAAEAPPEDHPHAAAPPPPTASISLSLSTLLSLSGHKPSAPPV GALPSKVRIPS  
QISAVSLSSSSAASSSKPSRTATRAAAISAFPLQAPLRYLTRPAEPSHPAAGRRTVWFRSDLRVHDNEAL  
TAASNDLSLLPVYLFDRDYGKSSSGFDKTGPYRATFLLESVRDLRNSLRARGSDLVVRVGRPETVLVELAR  
EVGADAVYAHQEVSHDEV RMEEKMAKVMEEEGVEVKYFWGSTLYHMEDLPFDLEHMPSNYGGFREKVQGLGVR  
KTIEALDQIKGMPRRGDVEPGDIPTLMDLGLTPPSTMGQDGKPASNSGLVGGETEALDRLKRFAAEFQAHPNK  
GDKDGNCGSIYGANFSCKISPWLAMGCLSPRFMFDELKKTARTISAASSQVNGGKPGNNGMNWLMFELMWRD  
FFRFITKKYSSTKKKIEAVPATACTGALV  
>Colocasia\_esc\_MQL88944.1\_Taro\_02151  
MLGGGAGGVGSTSGGGGGTTTSIVWFRDLRLLEDNPALAAAGVRSYVVALFIWAPEEEGHYYPGRASRWWSQ  
SLRHLDCSLRSLGTALITKRS LDAASTLVEVVRSTGASQVFFNHLYDPLSLVRDHRLKELLSSAQGITVRSFNA  
DLLEYPEVNDDEGQPFSTFAEFWNKCLSMYPDPAAPVLPKRIMSGDVSRCSSDNLVFEDDSEKGSNALLAR  
AWSPGWRNADKALAAFLSGPLIEYSVNRKKADSATTSLLSPHLHFGEVSVRKAFHLIRMKQLVWANDGSKAGE  
ESINLFLKSIGLREYSRYMSFNHPCSHEKPLLAHLKFFPWVDEGYFKAWRQGRGTGYPLVDAGMRELWATGWL  
HDRIRVVSSFFVKVLQLPWRWGMKYFWDTLDDADLES DALGWQYISGSLPDGRELDRIDNPQFEGYKFDPNG  
EYVRRWLPELARLPTEWIHHPWDAPESVLQAAGIELGSNYPLPIVEISEAKARLQEAIVEMWQLEAASRAAME  
NGTEEGLGDSSDLAPIDFPQGIQMEVEHEPVRINNPAALARRHEDQMVP SMTFSLVRDEEESYVDLGNREDN  
RPEVPSNLGFDPEPQRDTGNQAGATIPQNNNIPHFNLIRLQDAADSTSESSSSWTGRDGGVVPVWSPPTVSSH  
SEQFMGEDSAVGSSGYVRRHPPSRQLMNWWSHLSHNR  
>Colocasia\_esc\_MQL99100.1\_Taro\_03181  
MAKLEGLVLPGRIRVLKEAATPPGKEKKKGPPVYWMFRDQRCRDNWALIHAVDLANRSGAPVAVAFNLFHRFL  
GAHARQLGFMLRGLRELQARLAALRIPFFLFRGESGDTIPRFLGDCGASMLVTD FSPLEVRRSKDDICGRVG  
ASVAVHEVDAHNVPPLWSASGKLEYSARTIRTKIHKLLPEYLVEFPELPTPTAEWAAEPPAIDWDGLISDVL  
REGAEVPEMGWCEPGEAAAREVLMGSSEGFLTRRLRGYADDRNNPLKPKGLSGLSPYLHFGHISAQRCALEAR  
AFKKSHPQSVD A FLEEMIVRRELADNFCFYQPHYDSLQGAWEWARKTLTDHARDKRDHVYTKEELENAKTADP  
LWNASQLEMVHHGKMHGFMQRQIVLSTILIQVLIIRMYWAKKILEWTS GP EEALAI AIYLNDKYELDGRDPNGY  
VGCMWSICGVHDQGWREAVFGKIRYMNFAGCKRKFVDVGYIAYVKRLVGETKKRKLDSPTTKPKQTTITKSR  
RLSKAEG  
>Colocasia\_esc\_MQM06337.1  
MPWPARLGLQSLLGQLPSSAFLPRRCSGWILVRKDPNSCLLEFLVELKCTKVPMLPFGFQLAISCLGFASTTN  
CYFGCQYLVPDFRHLVVECLPENASKLLIMGSHSRTIVWFRDLRIEDNPALTTAGKDGSVLPVFIWCPKEEA  
QFYPGRVSRWWLKQSLIHFGKSLRSLGVPLILMRAEDTFSALLQCINATGSTRVFFNHLYDPVSLVRDHTIKS  
QLAEIGINVTTFNGDLLYEPWEVYDEQGLAFTTTFDAFW EKCKSLPVEPTFHLPPWRVLPDPGSEAVQGC SIEE  
LNLEKETEKSSNALLSRGWS PGWSNADKLLNEFMENHLIDYSRNM MKVEGATTSLLSPYLHFGELSIRKVYQS  
VRMKQMQLKEENSVA AESVKFFLKS LGLREYSRYLCFSFPFTHEKSLLGNLRHYPWQADEVQFKAWRQGRGTG  
YPLVDAGMRELWATGWIHNRTRVIVSSFCVKFLLLPWTWGMKYFWDTLDDADLES DILGWQYISGSLPDGHQL

DRLDSPEVQGWKFDPDGEYVRQWLPELTRVPTEWIIHPWDAPVSVLRAAGVELGLNYPKPIVDISVARERLDK  
AIAMMWELDRTSKAEKKDETSEVVDDNLAGFKSLDIPKVVVKREVTYTSSSNDQRVPSIQNLKSSCNPQCCKD  
IDHEKHNDNRNDSIAKPEKSHMEDLRSTAESSARKRSMSESLCAVPTSSFSSEAKFHDGYGLSKLQVPV  
ESTSMCLWQGNCNTDRMVTVCLSRWWTLTSEFQPGFIGCYWRHWFGRVPHMV

>Colocasia\_esc\_MQM06510.1\_Taro\_03933

MESNALLWFRKGLRIHDNPALDHARRGATRRLFPVFVLDPRYLEPDPTAFSPGSARCGINRIQFLLESADLD  
GSLRRLGSRLLVLRGGDPADVLIRVLKEWKIGKLCYEADTEPYGQARDNRVREFASASGIEIFSPVSHTLFD  
ADVIQKNGGKPLTYQSFVKLVGQPPSPIAQRVTSLPVGDVGEYEILGVPTLQELGYGDIGQVEFSPFRGGE  
SEALKRLKESLTSKEWVANFEKPKGDPSAFIKPATTVLSPYLKFGCLSSRYFYQSIQEIYKNAKRHTSPPVSL  
VGQLLWREFFYTVAFGTPNFDQMRENKICKQIPWSNDEKLLASWREGQTGFPPWIDAIMVQLQKWGMMHHLARH  
SVACFLTRGDLFIHWEKGRDVFERLLIDSDWAINNGNWLWLSCSSFFYQYHRIYSPTKFGKKYDPTGKFIRHF  
LPVLKDMPEKIYIEPWTAPLSVQKKANCIIGKDYPRPIVSHDTASKECKKKMGAEYAFNNLLGDANWKRLREK  
SEKDKLDPGRRPRLKQKRLG

>Colocasia\_esc\_MQM16981.1\_Taro\_04994

PETHHEAEKRPRHLPKHPRVVASLLVTSFFPSPSHTPLSLSLSPITTSLLPVPCHAMRVLVSPSPASLFFFF  
SSTVKPCLTPRRPPSSTSLSAPS FAMSSSSSTASSSTAPLPATRPGA AVQMPGLSAEEVAAAAD EAFARY  
TSAAGAGRRKEGAGVAVVWFRSDLRVLDNEALCRAWAASGSLLPVYCVDP RMFEETHYFGFPRTGAHRAQFLL  
ECLADLRKNLIKGLNLLVQH GKPEDILPAIAKAFGAHTVFAHKETCSEELLVERLVRDRLQQVTVILDGSPS  
QSIKPKLQLFWGSTMHYHIDDLPGTGS LPDIYTQFRKSVEYKCKVRSCYRLPTSLGPLPSHGMDEIGGWGNIP  
SLEQLGLVETKVDKGMCFIGGES AALARDLIKIYKETRNGMIRPDYSTKFSPWLAFGCLSPRYVYEEVKRYEK  
ERLANESTYWVLFELIWRDYFRFLSKKYGNSIFHLGGPRNVVSKWSQDQMLFESWRDGR TGYP LIDANMKELS  
ATGFMSNRGRQIVCSFLVRDMGIDWRMGAWEFEKCLLDYDPCS NYGNW TYGAGVGNDPREDRYFSIPKQAQTY  
DPDGEFVAYWLPELQALPKERRHSPGSSYIKQVVPLKFGS FNQKQGHASTEREKQKRLYNRKA

>Colossoma\_macr\_\_XP\_036413904.1

MAASRTVVCLLRNDLRLHDNEVFHWAQRNADHIVPLYCFDPRHYLGTHHFNFPKTGPFRLRLLLD SVKDLRAT  
LKKKGSNLIVRRGKPEEVVGDLIKQLGSVS AVAFHEEVTSEEKRVEKKVKHVCSQNKVKVQTFWGSTLYHRDD  
LPFCHIGGLPDVYTAFRKAVEAQSRVRPVLPSAEHIRPLPLGLEEGPIPTFDDLEQTEPLDDTRSAFFPCRGE  
SEALARLKHYFWETNAVAAYKETRNLGIGVDYSTKFAPWLALGCISPRYIYEQIKRYEAERTANQSTYWVIFE  
LLWRDYFRFVALKYGDRI FHLNGLQDKHVPWKTDMELEFNAWKEGRTGVPPVDANMRELFLTGFMSNRGRQNV  
SFLT KD LGLDWR LGAWEFEYLLVDYDVCSNYGNWLYSAGVGNDPREN RKFNMIKQALDYDSNGDYVRQWVPEL  
KGIMGGDVHTPWALSSASLSHAQVALDKTYPSPIVKASEWSRHINMKPSGAGSSKGGKSSHTPRQHRDRGID  
FYFSKSKNL

>Colossoma\_macr\_\_XP\_036415715.1

MPHRTLHLFRKGLRLHDNPTLLGALESSSVFVPVYVLDRAFE EVMRVGFLRWRFLQSLDDLHGRLSVVGS  
LYVLRGSHRAVLREL VVRWGITQISFDSETEPHHTVLQRELREMAEELGLTVNTCVSHTLYDPRRIIDANGGE  
APLTYKTFLRVLSDIGEPDKPVRDITTEDFQRCYTPDEAECEQYCVPSLSELGLEGPDEAQA EVLWPGETHA  
LQRLHKHLESQGWVENS KPAVPNSLWPNTTGLSPYFSFGCLSVRTFYHTLSRVYARARNHALPPVALQGQVL  
WREFFYTAATHTPNFTRMEGNPICLQIHNHDPDSLQKWRTARTGF PWIDAIMTQLRQEGWIIHLSRHAVACF  
LTRGDLWISWEEGMKVFE EYLLDADYSVNAGNMMWLSASAFFHQYNRIFCPVRFGRRTDPEGHYIRKYVPVLK  
NFP SRFIYEPWTAPEEVQLQAGCII GEDYPLPMVCHAEASERNLALMKEARSQENTAKLTRDVAEEPVDVCV  
KRELGEKDQPSKRFSSDPQSRPCSWGQETPRLPEITGQAM

>Colossoma\_macr\_\_XP\_036423969.1

MVVNSVHWFRKGLRLHDNPALQEALNGADTVRCVYILDPWFAGSANVG VNRWRFLLESLEDLDTCLRKLNSRL  
FVVRGQPADVFPRLFKEWNVTRLTFEYDPEPYGKDRDGAIVKIAQEFGVETIVRNSHTLYSPDRIIEMNSNSP  
PLTFKRQFQAI VNRLELPKKPLPTITQE QMASCRTQIADNHDEHYSVPSLEELGFKNQGDVTPVWKGGETEAL  
RLNKHLD RKAWVASFERPRINAHSLFANPTGLSPYLCFGCLSSRVFYHLRELYMKLRKSSPPLSLFGQLLW  
REFFYTAATNNPNFDRMEGNPICVQIPWDHNPEALAKWAEGR TGFPWIDAIMTQLRQEGWIIHLSRHAVACFL  
TRGDLWISWESGTVFEELLLDADWSVNAGSMMWLSCSA FFQQFFHCYCPVGFGRRTDPSGDYIRRYIPKLKD  
YPNRYIYEPWNAPE SIQKAANCVVGVDPKPMINHAESSRLNIERMKQVYQQLSHYRGLSLLASVPTIQEEAE  
PPLSDDSQASSGVPSSSQTQTQPQSQQTQTQPQPQPPDPDPQP PATASVPPAQRKRGRTP EPRTS LNPKVQHT  
SQA KASEQPPQT TDKQ

>Colossoma\_macr\_\_XP\_036440474.1

MSLAKASQVSAMLRDLMLGLEDEPFFCLCLSALGERDTRALFLDLIKPLASGHIQLYSQLTTIFFNYFSQGD  
EEALEVAIALSLHETTYRDDPPQSSSSDLAKEALGDSQAGDPKKPIKKECPLKDTRPQRTTTMIKRENNSDS  
SSCPADDESKNHDNMIHSVKPKMSRRHRQRKKQQLMQNPSAPRPVLLWFRRDLRMWDNPALIGCLELGAPIIP  
VFLWNAAE EEPGVTVATGGASKYWHLQALVCLNRSLEERSSHLVFQRAEPSSLAALQALVAETGAGAVVATA  
LYEPWLRDRDDSVWAVLEKQGVKCHIIYHSYCLRDPYTVSTKGVGLRGIGSVSHFMSCCQQNSGPGIGTPLDAP  
CILPTPLSWPQGCLPTQLGLARMPRRKDGTEIDWAVNIRQAWDFSEEGARARLETFLKDG VYRYEKESSRADA  
PNTSSLSPYLHFGQLSARSLLWDARGARCRPRKFQORKLAWRDLAYWQLSLFPHLPWESLRPPYKALCWSLDCA  
HLKAWQRGQTGYPLVDAAMRQLWLTGWMNNYMRHVVASFLIAYLHINWQAGYRWFQDTLVDADVAIDAMMWQN

GGMCGLDHWNFVMHPVDAALTCDPYGNVVRQWCPELKALPDDFIHKPWKCPSSVLCRAGVVFQNYPERIVVD  
LEERRAQLSDQVTLVRKRFSEYVCQQTGCDLVLPALQVQDAMGSGNDIVRHGEKEFLLPVITRMEFKHEPED  
TDTHDNYPYSAVLKGYVSRHRDEKIAFLNERDFTASVMYENARRRERLERDHCILEGLQCPTNKGKGQHRNVR  
PASGAVQKR

>Colossoma\_macr\_\_XP\_036440837.1

MVVNTVHWFRKGLRLHDNPRLRDSIAGADTLRCVYILDPWFAGSSNVGINRWRFLQCLEDLASLRKLNSRL  
FVIRGQPTDVFPRLFKEWKITRLSYEYDSEPFQKERDAAIKKLASEAGVEVTVRISHTLYDLDKIIELNGGQS  
PLTYKRFQTLISKMDAVETPAETITAEIMGKCATPISDDHDEKFGVPSLEELGFETEGLSSAVWPGGETEALT  
RLERHLERKAWVANFERPRMNANSLASPTGLSPYLRFGCLSCRLFYFKLTDLYRKVKKNSIPPLSLYGQLLW  
REFFYTAATNNPRFDKMEGNPICVQIPWDRNPEALAKWAEGRGTFPWIDAIMTQLRQEGWIHHLARHAIACFL  
TRGDLWISWEEGMKVFEELLLDADWSVNAGSWMWLSCSSFFQQFFHCYCPVGFGRRTDPNGDYIRRYLPILRG  
FPAKYIYDPWNAPEGVQKLAKCIIGVHYPKPMVNHAESRINIERMKQIYQQLSCYRGLGLLATVPSNSGGNG  
DGAGAGSGDSAQESSAAVHLTPANPREDLSASTFSCSHSDQQHGIIVQPQNSFSGTGRVGSHRQDSKQTLRGR  
GTVPMKRHNNEEPASSSGCKIQRQNSN

>Colossoma\_macr\_\_XP\_036450149.1

MKHKCIHWFRKGLRLHDNPALKAAALHDCEHIYPVFILDPWFPKNAQVGINRWRFLVEALKDLDSCLKKLKSRL  
FVVRGTPREVFPKLFEWKVTRLTFEVDTEPYSQIRDKEVMDLAKQHGVVEVITKISHTLYNIERIEEQNNGKP  
PLTYVRFQTVLKDMPKRPVPAPTREDMKGILTPSSDKHDEIYGIPTLEELGQDSSTLGPDLYPGGEQEALR  
RLDEYMQRGTGWVCSFEKPQTSNALSPTTVLSPYVKFGCLSAFTFWRLAEVYQGRKHSVPPVSLHGQLLWR  
EFFYTAAGVGPNSFKMEGNPNVCVQVDWDSNPEHLAAWREARTGFPFIDAIMTQLWQEGWIHHLARHAVACFLT  
RGDLWISWEEGQKVFEELLLDADWSLNAGNWQWLSASAFFHQYFRVYSPIAFGKKTDKNGDYIKKYLPLVKKF  
PPEYIYEPWKAAPKSVQQQAGCIVGKDYPRPIVDHVDVSKRNIQRMKAAYAKHSRDPHTSQTESKQKRKSASI  
KEMFTKKAKK

>Colossoma\_macr\_\_XP\_036453411.1

MLCTQRRASAGRAVNLIASAAALLSSLELRAALLTFLPRRAASMYARRAELKRKAELSSAVEGKKQKAEES  
GGERGERGGRQAGWLQLEVDELARNTGCKFNAKVRFLSENQKVPQCGGVLYWMARDQVRQDNWAVVYAQQ  
LALAEKLPLHICFCLVPRYLDAAQRQYAFMIRGLQKVAKECKSLDIQFHLLRGEPELTLPFCVKSWNFGAVVT  
DFNPLRLPLQWTEKVKKELPADVPMQVDAHNVVPCWEASPKLEYGARTIRGKITKLLPEFLTEFPVVDVPH  
PSTKTAKAVDWEVLSSVEVDRTVDEVKWAQPGTAGGMAMLESFIQHRLRLFATERNPNNSAALSQSPWLHS  
GQLSAQRVVKEVQRWGKNARESASFTTEELVVRRELADNFCFYKNKYDSIDGAYDWAKKTLKDHAADKRPYLY  
TQEQLNARTHDLQWNAQAQRQLLLEGKMHGFMRMYWAKKILEWTSSPEEALAIAYLNDHYALDGCDPNGYVG  
CMWSICGIHDQGAERAVFGKVRMYMNYAGCKRKFDVQGQFERRYTVKTA

>Columba\_livia\_AYE53929.1\_cryptochro

MGAAAPGPAPAVCCSGHWFRGLRLHDNPALHEALRDAASLRICIYILDPWFAASSAVGINRWRFLQSLLEDLD  
NSLRKLNSRLFVVRGQPTDVFPRLFKGGVTRLTFEYDSEPFQKERDAAIKLASEAGVEVVIENSHTLYDL  
RIELNNGHKPPLTYKRFQAIISRMELPKKPVSTIMSQQMEACKVDIQENHDDVYGVPSLEELGFPTDGLAPAV  
WQGGETEALARLDKHLERKAWVANERPRMNANSLASPTGLSPYLRFGCLSCRLFYRLWELYKKVKNSTP  
PLSLYGQLLWREFFYTAATNNPKFDRMEGNPICIQIPWDRNPEALAKWAEKGTGFPWIDAIMTQLRQEGWIH  
LARHAVACFLTTRGDLWISWESGVRVFEELLLDADFSVNAGSWMWLSCSAFFQQFFHCYCPVGFGRRTDP  
SGDYVKRYLPKLKGFPSRYIYEPWNAPEVQKAAKCIIGVDYKPMVNHAETSRLNIERMKQIYQQLSRYRGLCLLA  
SVPSCVEDLSGPVTDASGQGCSTSTAMRLSQADQSSPKRKHEGAELCTEELYKRARVTDLPATIEIPGKSV

>Columba\_livia\_NP\_001302444.1\_cryptochro

MGVNAVHWFRKGLRLHDNPALRECIQGADTVRCVYILDPWFAGSSNVGINRWRFLQCLEDLANLRKLNSRL  
FVIRGQPADVFPRLFKEWNTKLSIEYDSEPFQKERDAAIKKLASEAGVEVIVRISHTLYDLDKIIELNGGQP  
PLTYKRYQTLISRMEPLEMPVETITPEVMEKCTTPVSDHDEKYGVPSLEELGFDTDGLPSAVWPGGETEALT  
RLERHLERKAWVANFERPRMNANSLASPTGLSPYLRFGCLSCRLFYFKLTDLYKKVKKNSSPPLSLYGQLLW  
REFFYTAATNNPRFDKMEGNPICVQIPWDKNPEALAKWAEGRGTFPWIDAIMTQLRQEGWIHHLARHAVACFL  
TRGDLWISWEEGVKVFEELLLDADWSVNAGSWMWLSCSSFFQQFFHCYCPVGFGRRTDPNGDYIRRYLPVLRG  
FPAKYIYDPWNAPEVSIQKAAKCIIGVNYKPMVNHAESRLNIERMKQIYQQLSRYRGLGLLATVPSNPNGNG  
NGGLMGYSPGESISGCGSTGGTQLGTGDGHAVVQPCALGDSHTGASGVQQQGYCQASSILHYAHGDNQQSHLL  
QAGRTALGTGISAGKRPNPEEETQSVGPKVQRQSTN

>Columba\_liv\_\_XP\_005509179.2\_cry\_DASH-1

MSGTAICLLRCDLRAHDNQVLHWAQSSADVFVPLYCFDPRHLRLTQRCGFPKTPGPHRLRFLLESVKDLRET  
KKGSTLVVRKGPEDVVRDLITQLGSVSAAVAFHEEATQEELDVEQGLRQVCSQHGVKIQTFWGSTLYHRGDL  
FRPIARLPDVYTHFRKAVESEAKVRPTLRMADQLKPLAPGVEEGCIPTMEDLGQKDPVTDPRTAFCPSGGETQ  
ALMRLQYYFWDNTLVASYKETRNLVGMMDYSTKFAPWALALGCISPRYIYEQIRKYEKERTANQSTYVWVLFELL  
WRDYFRFVALKYGRRIFSRLGLQSKEVSWKKDLELFCWKEGKTGVPFVDANMRELAATGFMSNRGRQNVASF  
LTKDLGLDWRMGAEWFEYLLVDYDVCSNYGNWLYSAGIGNDPRDNRKFNMIKQGLDYGNGDYVRLWVPELQ  
IKGADIHTPWALNSAALAQAGVTLGETYPPPVVTAPEWSRHINQRPQGRNPHPRGRTGPAHPPAPHKDRGVDF  
YFSRKKDAR

>Columba\_liv\_XP\_005510394.1\_cry-1

MPHRTIHLFRKGLRLHDNPNTLLAALESSETIYPVYVLDRRFLASAMHIGALRWHFLLQSLEDLHKNL SRLGAR  
LLVIQGEYESVLRDHVQKWNITQVTLD AEMEPFYKEMEANIRRLGAELGFEVLSRVGHS LYDTRKILDLNGGS  
PPLTYKRFLHILSQLGDPEVPVRNLTAEDFQRCMSPEPGLAERYRVPVPADLEIPPQSLSPWTGGETEGLRRL  
EQHLTDQGWWANFTKPR TIPNSLLPSTTGLSPYFSMGCLSVRTFFQRLSNIYAQAKHHS LPPVSLQGQLLWRE  
FFYTVASATQNF TQMAGNPICLQIHWEYDAERLHKWKTAQTGF PWIDAIMTQLRQEGWIHHLARHAVACFLTR  
GDLWISWEEGMKVFEELLLDADYSINAGNWMWLSASAFFHHYTRIFCPVRFGKRTDPEGQYIRKYLPVLKNFP  
TKYIYEPWTASEEEQRQAGCIIGRDYPFPMVNHKEASDRNLQLMRRVREEQRGTAQLTRDDADDPMEMKRDCS  
EENTARGKVARGRE

>Columba\_liv\_XP\_005513288.1\_photolyase

MRRSRGKRKAEEAKLPRVSRRRKEEEEDAVQEARRTAPSVREFKYNKKRVRLVSQGS DLKEDARCILYWMFR  
DQRVQDNWAFLYAQRALALKQELPLHVCFLVPKFLDATIRHYDFMLKGLQEVT EEC AELNIPFHLLLLGYPKDV  
LPAFVVEHGVGGLVTDFSP LRLPRQWVEDIRERLPEDVPFAQVDAHNIVPCWVASPKQEYSAWTFRGKINSQL  
PEFITEFPFVICHYPYPPSCPAEPIAWEACYSS LQVDRTVKEVEWATPGTAAGLAVLQSFIAERLKYFGSHRNN  
PNKEALS NLS PWFHFGQVSTQRAILEVQKQRGKYKESVDVFVEEAVVRRELAENFCY YNENYDSVQ GAYDWAQ  
TTLKLHAEDKRPF LYKLQELEQGTTHDPLWNA AQLQM VQEGKMHGFLRMYWAKKILEWTRSPEEALQFAIYLN  
DRYELDGRDPNGYVGCLWSICGIHDHGWTERAVFGKIRYMN YAGCKRKFDV GQFERRYTPHTPSQ

>Colwellia\_psy\_WP\_011042217.1\_photolyase

MLLWLRNDLRTHDNPALHYFLSRNALSQHDSAVPAKAIF FICEQQWQ QHDSPIKIDFIKRHAHALVKELALL  
NIELELIELDNFTQ QKTYLHSYCQLHNITEVVANSEVEFNEQQRD KALYLELKASGIPLTLLEADVIVPKGV  
LNQSGIMYKVFTPFKRAWLTYIQQGGEYLGKVS VKSSAVNKADNQEEDQGSISSTWPLATVFEQQILPKFYQ  
QKISTYKLN RDIPSIKGTSGISPYLAAGVISPRFVLRLLLNKHPDLLVASDSEEF SWLNEI IWREFYRHLLFH  
EQRLCKHQCYKENYQ EMLWHNDAALFDAWCQGR TGYP LVD AAMRQLNQTGWMHNRLRMVVASFLT KHL LIDWR  
LGEKYFMQHLIDGDLASNNGGWQWAASTGCDAQPYFRIFNPIRQSERFDPKGVFIRKYIPELNNISDKAIHFP  
HQYIKDNELNIYWPAIVEHKEARL KALAFYKV

>Condylura\_cris\_XP\_004675775.1

MGVNAVHWFRLKGLRLHDNPALRECIQGADTIRCVYILDPWFAGSSNVGINRWRFL LQCLEDLDANLRKLNSRL  
FVIRGQPADVFPRLFK EWNITKLSIEYDSEFPFGKERDAAIKKLATEAGVEVIVRISHTLYDLDKI IELNGGQP  
PLTYKRQFQTLISKMEPLEIPVETITSEVIEKCTTPLSDDHDEKYGVPSLEELGFDT DGLSSAVWPGGETEALT  
RLERHLERKAWVANFERPRMNAN SLLASPTGLSPYLRFGCLSCRLFYFKLTDLYKKVKKNSSPPLSLY GQLLW  
REFFYTAATNNPRFDKMEGNPICVQIPWDKNPEALAKWAEGRTGF PWIDAIMTQLRQEGWIHHLARHAVACFL  
TRGDLWISWEEGMKVFEELLLDADWSINAGSWMWLS CSSFFQ QFFHCYCPVGFGRRTPNGDYIRRYLPVLRG  
FPAKYIYDPWNAPEGIQKVAKCLIGVNYPKPMVNHA EASRLNIERMKQIYQQLSRYRGLGLLASVPSNPNGNG  
GLMSYSPGENIPACSSSGSCPQGS GILHYAHGDSQQTHLLKQGRSPLGTGLSSGKRPNQEETQSSK VQRQST  
N

>Condylura\_cris\_XP\_004682938.1

MATAAVTAAAVSPAPAAVAEGASSVHWFRLKGLRLHDNPALLAAVRGARCVR CVYILDPWFAASSSVGINRWRFL  
LLQSLEDLDTSLRKLNSRLFVVRGQPADVFPRLFK EGVTRLTFEYDSEFPFGKERDAAIMKMAKEAGVEVVTE  
NSHTLYDLDR I IELNGQKPP LTYKRQAIISRMELPKKPVGSVTSQQMEGCRADIQENHDETYGVPSLEELGF  
PTEGLGPAVWQGGETEALARLDKHLERKAWVAN YERPRMNAN SLLASPTGLSPYLRFGCLSCRLFYRLWDL Y  
KKVKRNSTPPLSLFGQLLWREFFYTAATNNPRFDRMEGNPICIQIPWDRNPEALAKWAEGKTGF PWIDAIMTQ  
LRQEGWIHHLARHAVACFLTRGDLWVSWESGVRVFD ELLLDADFSVNAGSWMWLSCSA FFQ QFFHCYCPVGFG  
RRTDPSGDYVRRYLPKLKGFP SRYIYEPWNAPE SVQKAAKCVIGVDYPRPIVNHAE TSRLNIERMKQIYQQLS  
RYRGLCLLASVPACVEDLSNPVAEPSSSQAGSTSSAGPRPLPSGAASPKRKLEAEE EAPGEELSKRARVAGLP  
TPEAPGKDV

>Coregonus\_sp.\_'balchen'\_CAB1313618.1\_unnamed\_pr

MVGNTIHWFRKGLRLHDNP SLKESIRGADTLRCVYILDPWFAGSSNVGISRFL LQCLEDLDASLHKLNSCLFV  
IRGQPTDVFPRLFK EWINRLFYEYDSEFPFGKERDAAIQKLASEAGVEVTLNRGQSPLTYKCFQVLISHMDAV  
EMPAETITA EVMRKATPISDDHDDKFGVPSLEELGFETEGLATAVWPGGETEALT RLERHLERKAWVANFER  
PRMNVN SLLASPTGLSPYLRFGCLSCRLFYFKLTDLYRKVKKNSSPPLSLY GQLLWREFFYTTATNNPCFDKM  
EGNLVCVQIPWDRNPEALAKWAEGRTGF PWIDAIMTQLRQEGWIHHLARHAVACFLTRGDLWISWEEGMKVFE  
ELLLDADWSVNAGSWMWLS CSSFFQ QFFHCYCPVGFGRRTPNGDYIRRYLPILKGFP AKYIYDPWNAPE SVQ  
KAAKCVIGVHYPKPMVHHA EASRLNVERMKQIYQQLSCYRGLGLLATVAANPNNGHGAGVTSRMREPLKQQQ  
GPEADQQLVPEEEKEEGIPATLLSSRVDQRLNIASSFPDSSTLQEH IYLRGVSSNRNGREETASIPQTLSD F  
CEVSWLNGTSDHMPRELIAASLSVTFSLCGESQTQCSNHKPTVTLSPVLLER

>Coregonus\_sp.\_'balchen'\_CAB1322736.1\_unnamed\_pr

FLLESLEDLDSSLRKLNSRLFVVRGQPANVFPSL FKEWNVTRLTFEYDSEPYGKERDGA IIMKAEFGVETIV  
RNSHTLYNLDR I IELNNCPPLTVKNHPPLTFKRQFQALVNRLELPMKPLPTITQE QMDSCR TKIADNHDEHYS  
VPSLEELGFKTQGLNPAVWKGGESEALERLNKHLDRKAWVANFERPRINMCSLIASPTGLSPYLRFGCLSCR V  
FYYNLRELYMKLRKHCS PPLSLFGQLLWREFFY AAGTNNPNFDRMEGNPICVQIPWDHNPEALAKWAEGSTGF

PWIDAIMTQLRQEGWIHHLARHAVACFLTRGDLWISWESGMRVFEELLLDADWSVNAGSWMWLSCSAFFQQFF  
HCYCPVGFGRRTDPSPDYIRRYIPKLDKYPNRYIYEPWRAPESVQKAAKCIQVVDYPQPMINHAEGSRLNIER  
MKQVYQQLSHYRGLSLLASVPTIQEEAEPPPTDDSQASSSTCDSPPHTSSAQSNLTKRGRPSEPQSTQTCTHT  
KHLHTSPSKDQEQQWEEQSEHQPVDLQ  
>Coregonus\_sp.\_'\_CAB1354074.1  
MMAKQTGTQAKHYQCLEDLHRSLQALGSRLYVLQGPYQGTVMRLVAQWGITQLSMDTEIEPHYTQLDQQHRIM  
ARTCPSPAAEEYSEG DYRAPSGWVANFSPKPTIPNSLLPSTTGLSPYLSLGCLSVWAFYHKLSKIYAQSKNHS  
LPPVSLQGQVLWREFFYTVASATANFIKKEGNSICL  
>Coregonus\_sp.\_CAB1313746.1\_unnamed\_pr  
MPVSGGEDPMSQVRQMLRELLVGRENADGFFCLCVSVLGHNDTRTHFLPLIQPLATVHNGLHTTSLTSIYFEYF  
SKDEDELAVALALSLLLEVKGQQQTDTKSLFPDPKPGQQTDTQATATYRPQNSSVQSQSVSHNGSSSQPPAP  
LPKGVSYAQLAAAGRRQTQAQHQDSTSPRGSSGHGSSPQTERQRGPTQTQRQTDIKWSNLTQDVCASIASSL  
TSNLNQTKDDVNVEEYDQSEKPKRSKNRRQRRKGYGQQVVGVP RCPSPAPPVLLWFRRDLRLHDNPAVIGS  
LEAGGPVPIPVFIWCPEEEEEPGVTVAMGGACKFWLHQALSCLSALERIGGHLVFLRPDVEKEVEREGVGSSSL  
RALRSLVRETGAQTVLASALYEPWLRERDQIVVSALQDRDRVEVMVHSYCLRDPYTVTTTEGVGLRGIGSVSHF  
MSCCQMNPGPGLGVPLDPPISLSPSPVWPRGCPLEELGLARMPCKDGTIDWAANIRSSWDFSEEGAQSRLE  
AFLNDGVYKYEKESGRADAPNTSCLSPYLHFGQLSARWLLWDAKGARCRPPKFIRKLAWRDLAYWQLTLFPDL  
PWESLRPSYKARIGERGHKAWQGRGTGYPLVDAAMRQLWLTGWMNNYMRHVVASFLIAYLHLPWQEGYRWFQ  
NGGMCGLDHNFMHPVDAAMTCDPYGSYVRKWCPELAALPDDLHKKPWKCPASMLRRAGVVLGQSYPERVVT  
DLEERRSQSLQDVALVRRRCGEYVDPSCGCDLVPLPRLVSEALGGGVVNTGGQFLLPVITRMEFKHQSDNPD  
ADAASNYPYNAV LKGYVSRRRNETIAFLNQTDFTASVINEGAERRERQEKDQRRMEGLPHPLAARGRGRTPAA  
KDRFSTVPGGVATSHR  
>Coregonus\_sp.\_CAB1317817.1\_unnamed\_pr  
MHRSLLLIPASKHIWKFTLESQRHCYSSSLTKLVGLSSINNRTTMPAKKRKATFAKMDNAKQQKLQAVKEGE  
REREKGWLQGVVAEQRKEKQDLKFNKKRLRFLSQTQKIKQGSEGVVYWMNRDHRVQDNWALIHAQQALALEEKL  
PLHICVCLDCSALDIQFHLLQGSAGELLPGFVRDWILGAVVTD FSPLRTP LQWVEEVD AHNVPVPCWVASDKLE  
YAARTIRTKITKLLPEFLTEMLVDKHPHPAVRTAKPVDWAEVLSSLEVDRTVEEVDWAKSGTAAGIAMLESF  
IDLRLKNFATQRNNPNSSAVSQ LSPWIRFGHLSAQRVVLQVRSKGKSAAESVSSFTEELVKTLKDHA KDIRPY  
VYTRKQLEKAQTHDKLWNAAQYQMVIEGKMHGFLRMYWAKKILEWTSSPEGALSIAIYLNDRYELDGQDPNGF  
VGCMWSICGIHDQGWAERPIFGKIRYMNKYGCTRKFDVAQFERKYCPKDL  
>Coregonus\_sp.\_CAB1341255.1\_unnamed\_pr  
MDKTRRGEPKEKGLEREKGKSGGQCGERDEGSHRKKPGQEEKKRGRREMETALIGLHPSSPLVPGCKADPSP  
RPHSSVLAARLSFTVLLPCLLDSLDVQSDRPSGTINRLVDIREPSVDPQKPSRTDLVKPINHQNRDLRLVDHQ  
DFYSEAIRTIRPSSGSIDQSDRPWTLSPSDRLVNMSTSR TVICLLRNDLRLHDNEVFHWAQRNAEHIVPLYCF  
DPGHYLG TANYNLPRTPGFRLRFLLD SIQDLRTSLIQRGSTLVVRRGRPEEVVSDLIKQLGSVS AVAFHEEMK  
VKVHTCWGSTLYHRDDLFPNHLSRLPDVYTQFRKAVETQGRVRPVLPTLDQLKPLPPGSGLDEGPIPSPEDLE  
QTD TDAVATYKETRNLGMGMDYSTKFS PWLAIGCISPRYIYQ QIKKYESERTANQSTYWVVFELLWRDYFKFV  
GAKYGDRLFDIKGLQDKSIPWKKDMNLFNAWKEGRTGVFPVDANMRELALTGFMSNRGRQNVHDHVS SNYGNW  
LYSAGIGNDPRENRKFNMIKQGLDYDNNVCFSLTNNTVELPQLYLKGDYVRFWVQELQGIRGGDVHTPWTLS  
ASLSHALVTLDETYPSPIVMVP EWSRHANKKPTGAGPSARGKKGPSHTPKQHKDRGIDFYFSKSKNF  
>Coregonus\_sp.\_CAB1352867.1\_unnamed\_pr  
MLEKLDQDPEELFPGGEQEALRRLDQHMERKEWVCGFEKPQTS PNSLSPSTTVLSPYMTFGCLSARTFWWRLT  
DVYQGGKHSQPPVSLHGQLLWREFFYTAGLGIPNFDKMEGNPVCTQARTGFPFIDAIMTQLRQEGWIHHLARH  
AVACFLTRGDLWISWEEGQKVFEELLLDGDWSLNAGNWQWLSASTFFHQYFRVYSPIAFGKKTDKNGDYIKNY  
LPLLLKKYPAQYIYEPWKAPRSVQEAAGCIVGKDYPRPIVAHEVISKKNIQRMKAAYAKRSPHSSEESPGKEKG  
LFPLGTDIGSASPNNLNRIG  
>Coryphaena\_hipp\_\_AZB52138.1  
ESFIDVRLKLFGTQRNNPNAAALSQ LSPWIRFGHLSAQ RVALQVKHAGKNASESTSAFIEELVVRRELTDNFC  
FYNNKYDSVEGAYEWAKKTLKDHC TDKRPYIYTRQQLEKAKTHDKLWNAAQYQMVTEGKMHGFLRMYWAKKIL  
EWTTSPEEALSIALYLNDRYELDGQDPNGFVGCMWSICGIHDQG  
>Coryphaenoides\_rupe\_\_KAG7255536.1  
FLLQSLDLDASLRKLNRLFRPAHDVFPRLFKEWGDQRLSYEYDSEFPFGKERDAAIKKLACEAGVEVTVRIS  
HTLYDLDKIIELNGQSPLTYKRFQTLISRMEPVEVPADAITADAMWKCTTPLSGRPRRQVRRPLPGGSWVSF  
DTEGLSAVWPGGETEALTRLERHLERKAWVANFERPRMNANSLASPTGLSPYLRFGCLSCHLFYFKLTDLY  
RKVKKNSSPPLSLYGQLLWREFFYTAATNNPCFDKMEGNPICMQIPWDRNAEALAKWAEGQTGF PWIDAIMTQ  
LRQEGWIHHLARHAVACFLTRGDLWISWEEGMKVFEELLLDADWSVNAGSWMWLSCSSFFQQFFHCYCPVGF  
RRTDPNGDYIRRYLPYIYEPWNAPECVQKAAKCVVGVHYPKPMVNHAESRLNIERMKQIYQQLSCYRGLGLL  
ATVPSNTNGSGEASSGMLGFMEPAVAATTQNSASAPSGYQMVAAAPSQGDWQSAVMTYAPDEAQGGLGGAQQ  
QGYSVPGNSLMYYTQSAQQVLPVAVTQGARHHVQSIGKRHSEDAGSGSSSKFQRQCSH  
>Coryphaenoides\_rupe\_\_KAG7259523.1

MCTPARTVICLLRNDLRLHDHEVLHWAQSNAEHIVPLYCFDPRHYLGTSVYNLPKTGPFRLRFLLDSDVKDLRS  
SLVASEERAVERAVKDVCMKVHVHTCWGATLYHRDDLFPFHLARLPDVYTQFRKAVETQSRVRPLIVSPDQ  
LRPLPPGLEEGALPTLEDLGQSEPVADPRSAFPCRGGESQALARLQHYFWDTDVAVATYKETRNLIGTDYSTK  
LAPWLAMGCLSPRYVHHQIQQYESQRTANQSTYWVIFELLWRDYFKFVGVKYGNRLFHIRGLQDKSI PWKKDM  
ALFNAWKEGRTGVFPVDANMRELAMTGFMNSNRGRQNVASFLT KDCLDWRMGAEWFEYLLVDHVC SNYGNWL  
YSAGLGNDPRENRKFNMIKQGLDYDSNGDYVRRWLP ELRGVGGGDVHTPWTLSSAALAH AQVSLGDGYPPVPV  
MAPEWSRHAGRKPSDSGSSTRGRKGPSHTPKRHGDRGVDFYFSKSKNL

>Coryphaenoides\_rupe\_\_KAG7269861.1

MPSDKRKSAPCGEAPHAKKQKKFPPLTEERRERPEGWLQTEVEKQRAAEAGVQC�NHKTRFISDAQVKVQGSE  
GILYWMTRDHRVQDNWALIHAQQ LAMEEEQPLHVCVCLLV PESALSTLRHYSFMLKGLEEVAKECKALDIQFH  
LLRGAPAEVLPLGLVSDRGLGAVVTD FLPLRTPRQALESLKKS LPDDVPLVQVDAHNIVPCWVASPKLEYSART  
IRGKITKLLPEFLTDFPVVGKHL YTATRTDKPVDWAEALGSLRLDGAVGEVAVARPGAATGTAMLESFIDLRL  
RHFATHRNDPNSAALSQ LSPWIRFGHLSAQ RVALQVQRF GKKFSQS VAPFIEELVVRRELT DNFCFYNDNYDN  
VKGAYEWAQKTLKDHA KDKREYYQMVTEGKMHGFLRMYWAKKILEWTASPEQALSIALYLNDRYSLDGQDPNG  
FVGCMWSICGIHDQGWAERP VF GKIRYMNYKGCLRKFDVAEFETKYCPKKL

>Coryphaenoides\_rupe\_\_KAG7271508.1

MKRLSCSTGGGGGGGGGGGGCSTSSSGPECHAYSAGMAPACSIHWFRKGLRLHDNPALMSALRDCQELYPLF  
ILDPVCVNKEAMGANRWRFLLGALRDLDGGLRKLN SRLFVGAPQDVLPGLFREWGVSRLT YEYDTEPYSTRRD  
QAVGALARDHGVEVVYRISHTLHNIDRIIEENNGKAPLTYVR FQAVLKNLGP PKRPI PAPNLQDMKDVRTPCP  
AESGDEQQQKYGLPTLEELG HDLSCLQEALFP GGGEEALRRLEEHMERTAWVCSFEKPQTS PNLSPSTTVLS  
PYVTFGCLSARTFWWRLTDVYQ GKKHSAPPVSLHGQLLWREFYYTASVGVPNFHRMLGNPVCTQIDWDTNPEY  
LAAWREVFEELLLDG DWALNAGNWLWLSASAFFH QYFRVYSPVAFGKKTDKHGDYIKKYL PVLKKFPAEYIYE  
PWKAPRSVQEVAGCIVGKDYPRPIVEHEVISKKNIQRMKTSYAKRSQGVSESPQPQKEE

>Coryphaenoides\_rupe\_\_KAG7282122.1

MVVNSVHWFRKGLRLHDNP SLQEALIGADSVCCVYILDPWFAGSANVGLGINRWRFLLESLEDLDNSLRKLNS  
RLFVVRGQPTDVF PRLFKEWNVTRLT FEYDPEPFGKERDGAIIKVAHELGVETIEWNVTRLT FEYDPEPFGKE  
RDGAIIKVAHELGVETIVRNSHTLYNLDRIVEMNNNNP LTFKRFTIVNRLDLPRRPLPTVTAQQMERCKTR  
ISKDHDRHYSVPSLEELAGLSPFLRFGCLSCRLRKRCSPPLSLFGQLLWREFFYTAATNNPSFDRMEGNPICV  
QIPWDQNPEALAKWAEGR TGFPWIDA IMTQLRREGWIHHLARHAVFEELLLDADWSVNAGSMMWLSCSAFFQQ  
FFHCYCPVGFGRRTDP SGDYIRRYIPI LKDYPNRYIYEPWSAPLSVQKAANCVVGVDPKPMINHAEASRLNI  
ERMKQVYQQLSHYRGLNSPVHEPAARPLVPDSSTARTSSPAADADASHAAHTQPPQTPPSSSASTHTSTFPA  
FSPTPAIASVTKEPATVFLPPPQIPFPSSHAAASSQSPARDPAATPGPTVPVDLSHVTNPFVALSPRPVTLAA  
AGQHAAFLGHRKKGQPRKHRR TQSRGLLGGAPAGKADGGAKAAGRAGEGEEHMEEDVVF SRTG

>Corythaeola\_cris\_\_NXCl3099.1

KVDYDVC SNYGNWLYSAGIGNDPRDNRKFNMIKQGLDYDNGD YIRLWVPELQGIKGADIHTPWALNSAALSQ  
AGVTLGETY PQPVVTAPEWSRHTNQR PQGRSPHPRGRGPAHTPVQHRDRGIDFYFSRK KDV

>Corythaeola\_cris\_\_NXCl4474.1

MGVNAVHWFRKGLRLHDNPALRECIQGADTVRCVYILDPWFAGSSNVGINRWRFL LQCLEDLDANLRKLNSRL  
FVIRGQPADVF PRLFKEWNI AKLSIEYDSEPF GKERDAAIKKLASEAGVEVIVRISHTLYDLDKI IELNGGQP  
PLTYKRFTLISRMEPLEMPVETITPEVMEKCTTPVSDDHDEKYGVPSLEELGFDTDGLPSAVWPGGETEALT  
RLERHLERKAWVANFERPRMNANSLASPTGLSPYLRFGCLSCRLFYFKLTDLYKKVKKNSSPPLSLYGQLLW  
REFFYTAATNNPRFDKMEGNPICVQIPWDKNPEALAKWAEGR TGFPWIDA IMTQLRQEGWIHHLARHAVACFL  
TRGDLWISWEEGMKVFEELLLDADWSVNAGSMMWLSCSSSFFQQQFFHCYCPVGFGRRTDPNGDYIRRYLPVLRG  
FPAKYIYDPWNAPESVQKAAKCIIGVNYPKPMVNHAEASRLNIERMKQIYQQLSRYRGLGLLATVPSPNPNGNG  
NGGLMSYSPGESISGCGSTGGHLFPSSPGAQLGTGDGHTV VQPCPLGDSHTGASGIQQQG

>Corythaeola\_cris\_\_NXCl8833.1

DNWAFLYAQR LALKQELPLRVCFCLVPKFLGATIRHYGFMLRGLQEVAEECAELNIPFHLLLG YAKDVLPPFV  
VEHGVGLVTD FCPRLRLPRQWVEDVRERLPEDVPFAQVDAHNIVPCWVASPKQEYSASTIRGKIHAQLPEFLT  
EFPPVICHYPPLSCLAEP IAWESYSSLQVDRTVKEVEWATPGTAAGLAVLQSFIAKRLKSFGSHRNNPNKEA  
LSNLSPWFHFGQVSTQRAILEVQKHRGKYKESVDMFVEEAVVRRELAENFCYNNENYDSVQGAYSWAQTTLKL  
HAKDKRPFLYELQELEQGTTHDPLWNAAQ LQMVREGKMHGFLRMYWAKKILEWTRSP EEALRFAIYLNDRYEL  
DGRDPNGYTGLQEGGCLWSICGIHDHGWTERAVFGKIRYMNYAGCKRKFDVGEFERRYAPDM

>Corythaeola\_cris\_\_NXCl9319.1

MPHHTIHLFRKGLRLHDNP TLLAALESSETVYPVYILDRKFMTTVMHIGALRWHFLLQSLEDLQKNLCQLGSC  
LLVIQGEYESVLRDHVQKWNITQVTLDAEME PFYKEMEANIRRLGEELGFEVLSLVNHSLYDTR ILDLNGGT  
PPLTYKRFLHILSL LGDEVPVRNLMVEDFQRCSPDPGLAECYRVPLPVDLKI PLESFSPWRGGETEGLQRL  
EQHLTDQGWVASFTKPR TIPNSLLPSTTGLSPYFSLGCLSVRTFFYRLSNIYAQAKHHS LPPVSLQGQLLWRE  
FFYTVASATPNFTKMAGNPICLQISWYEDAERLHKWKTAQTGFPWIDA IMTQLRQEGWIHHLARHAVACFLTR  
GDLWISWEEGMKVFEELLLDADYSINAGNMMWLSASAFFH QYTRIFCPVRFGKRTDPEGQYIRKYLPI LKNFP

SKYIYEPWTASEEEQKQAGCIIGQDYPPFMVNHKEASDHNQLQMKQVREEQYGTACLTRDDTDDPMEMKVKRD  
HSEDNISKGKVARMRE

>Corythaeola\_cris\_\_NX19504.1

RFLQLSLEDLDNSLRKLNLSRLFVVRGQPTDVFPRLFKEWGVTRLTFEYDSEPFGKERDAAIVKLAKEAGVEVV  
IENSHTLYDLDRILIELNGHKPPLTYKRFQTIISRMELPKKPSTVISQQMETCKVDIQENHDDVYGVPSLEEL  
GFPTDGLAPAVWQGGETEALARLDKHLERKAWVANYERPRMNANSLLASPTGLSPYLRFGCLSCRLFYRYLWE  
LYKKVKRNSTPPLSLYGQLLWREFFYTAATNNPKFDRMEGNPICIQIPWDRNPEALAKWAEKGTGFPWIDAIM  
TQLRQEGWIHHLARHAVACFLTRGDLWISWESGVRVFDELLLDADFSVNAGSWMWLSCSAFFQQFFHCYCPVG  
FGRRTDPSGDYVKRYLPKLKGFPSRYIYEPWNAPEVQKAAKCIIGVDYPKPMVNHAEYSRLNIERMKQIYQQ  
LSRYRGLCLLASVPSCVEDLSGPVTDASAGQGCSTSTAVRLSQADQASPKRKHEGAEELCTEELYKRAKVTGL  
PTPEIPGKSL

>Corythaixoides\_conc\_\_NXJ87972.1

MGVNAVHWFRLKGLRLHDNPALRECIQGADTVRCVYILDPWFAGSSNVGINRWRFLQLCLEDLDANLRKLNLSRL  
FVIRGQPADVFPRLFKEWNIAKLSIEYDSEPFGKERDAAIKKLASEAGVEVIVRISHTLYDLDKIELNGGQP  
PLTYKRFQTLISRMEPLEMPVETITPEVMEKCTTPVSDDHDEKYGVPSLEELGFDTDGLPSAVWPGGETEALT  
RLERHLERKAWVANFERPRMNANSLLASPTGLSPYLRFGCLSCRLFYFKLTDLYKKVKKNSSPPLSLYGQLLW  
REFFYTAATNNPRFDMKMEGNPICVQIPWDKNPEALAKWAEGRGTGFPWIDAIMTQLRQEGWIHHLARHAVACFL  
TRGDLWISWEEGMKVFEELLLDADWSVNAGSWMWLSCSSFFQQFFHCYCPVGFGRRTPNGDYIRRYLPVLRG  
FPAKYIYDPWNAPEVQKAAKCIIGVNYPKPMVNHAEASRLNIERMKQIYQQLSRYRGLGLLATVPSNPNGNG  
NGGLMSYSPGESISGCTSTGGHLFPSSPGAQLGTGDGHTVVQPCPLGDSHTGASGIQQQGYCQASSILHYAHG  
DNQQSHLLQAGRTALGTGISAGKRPNPEEETQSVGPKVQRQSTN

>Corythaixoides\_conc\_\_NXJ92683.1

KVDYDVCSSNYGNWLYSAGIGNDPRDNRKFNVIKQLDYGNGDYIRLWVPELQGIKGADIHTPWALNSAALSQ  
AGVTLGETYPPQPVVTAPEWSRHTSQRPPQGRSPHPRGRGPAHTPVQHKDRGIDFYFSRKDV

>Corythaixoides\_conc\_\_NXJ93935.1

RFLQLSLEDLDNSLRKLNLSRLFVVRGQPTDVFPRLFKEWGVTRLTFEYDSEPFGKERDAAIVKLAKEAGVEVV  
IENSHTLYDLDRILIELNGHKPPLTYKRFQAIISRMELPKKPSTVISQQMETCKVDIQENHDDVYGVPSLEEL  
GFPTDGLAPAVWQGGETEALARLDKHLERKAWVANYERPRMNANSLLASPTGLSPYLRFGCLSCRLFYRYLWE  
LYKKVKRNSTPPLSLYGQLLWREFFYTAATNNPKFDRMEGNPICIQIPWDRNPEALAKWAEKGTGFPWIDAIM  
TQLRQEGWIHHLARHAVACFLTRGDLWISWESGVRVFDELLLDADFSVNAGSWMWLSCSAFFQQFFHCYCPVG  
FGRRTDPSGDYVKRYLPKLKGFPSRYIYEPWNAPEVQKAAKCIIGVDYPKPMVNHAEYSRLNIERMKQIYQQ  
LSRYRGLCLLASVPSCVEDLSGPVTDASAGQGCSTSTAVRLSQADQASPKRKHEGAEELCTEELYKRAKVTGL  
PSPEIPGKSL

>Corythaixoides\_conc\_\_NXJ95526.1

MPHHTIHLFRKGLRLHDNPITLLAALQSSETVYPVYILDRKFMTTAMHIGALRWHFLLQSLEDLQKNLCQLGSC  
LLVIQGEYESVLRDHVQKWNITQVTLDAMEPFYKEMEANIRRLGEELGFVLSLVNHSLYDTKRILDLNGGA  
PPLTYKRFLRILSLLDGPEVPVRNLVVEDFQRCRPPDPGLAERYRVPLPVDLKIPLNFSPWRGGETEGLQRL  
EQHLTDQGWVASFTKPRITPNSLLPSTTGLSPYFSLGCLSVRTFFYRLSNIYAQAKHSLPPVSLQGQLLWRE  
FFYTVASATPNFTKMAGNPICLQISWYEDAERLHKWKTATGTGFPWIDAIMTQLRQEGWIHHLARHAVACFLTR  
GDLWISWEEGMKVFEELLLDADYSINAGNMMWLSASAFFHQYTRIFCPVRFGKRTDPEGQYIRKYLPIKKNFP  
SKYIYEPWTASEEEQKQAGCIIGQDYPPFMVNHKEASDHNQLMERVREEQYRTAQLTRDDTDDPMEMKVKRD  
HSEDNVSKGKAARMRE

>Corythaixoides\_conc\_\_NXJ96048.1

DNWAFLYAQRALQELPLRVCFCLVPKFLDATIRHYGFMLRGLQEVAEECAELNIPFHLLLGyakDVLPPFV  
VEHGVGGLVTDFCPLRLPRQWVEDVRERLPEDVPFAQVDAHNIIVPCWVASPKQEYSASTIRGKIHSQLPFLT  
EFPPVISHPYHPSCPAEPIAWEASYSSLQVDRTVKEVEWATPGTAAGLAVLQSFITKRLKSFSGSYRNNPNKEA  
LSNLSPWFHFGQVSTQRAILEVQKHRGKYKESVDTFVEEAVVRRELAENFCYNNENYDSVQGAYSQAQTTLKL  
HAKDKRPFLYELQELEQGTTHDPLWNAQLQMVREGKMHGFLRMYWAKKILEWTRSPPEALQFAIYLNDRYEL  
DGMDPNGYTGKLQEGGHRAGRGCLWSICGIHDHGWTERAVFGKIRYMNYAGCKRKFDVGEFERRYAPGM

>Crassostrea\_gig\_ANJ02841.1\_cry\_1

MNTNREEVVVHWFRLHRLHDNPISLIDGLSECDFYPVFIFDGEVAGTKTAGYNRFRFLLECLQDLQDLKLNKAA  
GTRLYCFQGGQPTDILERLIEEWGVTKVTFEADPEPIWQERDLVRELLDKKNVQCVEKVSHTLWDPYEIENN  
GGSPPLTFSLFNLVSTIGPPPVPVEDPDFTDISLPVSQNHDKQFGIPSLLEDLNRPECEEQNKRLEWVLGGE  
SKALELLAIRMKHEEKAYENGYPMPNQYHPDLLSPPLSLSAHLRFGCLSVRKFYWSIHDKFEEVKPSMGAPVS  
LSAQLMWREYFYTMAINNINYDKMETNPICLNIPWYDNPEHEEKWTQGETGYPWIDAIMKQLRYEGVHHVAR  
HAVSCFLTRGDLWLNWEVGLKVIFYKYLLDADWSVCAGNMMWVSSSAFEKVLQCPNCFCPVRYGKRMDPSGEYV  
RRYLPVLKDMPLRYLFEPWKAPLPVQQKAKCIVGVDYPKPMVDHQKASKECIQNMKAVKDALMGREIPHCAPS  
EEIEARRFSWLPDHTPSGGHCTANFLCDGLKDMN

>Crassostrea\_gig\_AQM57602.1\_cry\_2

MSKSSKRKHVVHFRKGLRLHDNP SLREALKGSSSYRCVYILDPWFAGSSQVGINKWRFL LQCLEDLDTSLRK  
LNSRLFVLRGQPTDLFPKIFKEWNIT TLSFEEDPEPFGERDGAIQMLAKEAGVEVIVKTSHTLYDLQKI IAM  
NGGSPPLTYKRFQSVLAKMEAPSEPEETINSGLVKTPTPIAEDHDDKYGVPTLEELGFDTEGLGPAVFHGGE  
AEALTRLERHLERKAWVASFERPKMSQQSLFPSQNVLSPYLRFGLSARLFYWKLRRELYRKVKRKPPLSLH  
GQLLWREFFYT VATNNPNFDRMKDNPLCVQIPWDKNPEALAKWAEGKTGF PWIDAIMMQLRQTGWIIHNLARHS  
VACFLTRGDLWISWEEGMKVFEELLLDADWSVNAGMWWLSCSSFFQQFFHCYCPVGFGRADPTGDFIRTYL  
PVLKGYPAKYIYEPWTAPESVQRAAKCIIGEDCPVPMVNHAEVSKLNTGRMKQVYQQLAVYASIASVPKQIHS  
EEPYSKHEKAMHSGNHPSRVAMLENTDRGNHSQMSA

>Crassostrea\_gig\_AQM57607.1\_cry-like\_p

MESPTRKEILHNFQTGVIDAEECFMIVSLDGYDSTRQHFLKNIDFLRLTNPKKYNELFTVFANYFEKPPSGA  
FLDPFIGCSVENGYLTSDFGYELEVELASALS LQDQSESLNSKASYVSVVQEPISKQRNTSSNSERNQPKNVNN  
SYSKNVKDDNDSVTSSVSKSKRKNKGSTNRPVVYWFRRDLRLYDNPALFEAASMNVPVILVFLWSESEEDPEG  
VVAAGGATKLWLHHALNHLDKSISDRYNNRIIYRKTQSCQREILSLIEETGAKALLINDVYEPFLKQRDDKIC  
SELQRKGIECKRFHSHYLLHEPGSVSAESVGMRGVGSVTHFMECCRQSDAQPIGHPLDYPPTLPKPDQFPSSSS  
LHDLELAKMPRRKDGSIIDWAAPIVRQWDFGEEGAWKALELFLSEGVRKYEKESCRTDHLNTRCISPYLHFGQ  
ISPRAVLEEARMKSPKFLRKLAWRDL SYWLLTLWPDLP SQPTRVHYRDQAWSRDAGHLKAWQRGRTGFPLVD  
AAMRQLWLEGWINNYLRHVVASFLISYLR LHWVEGYRWFQDTLLDADVAINAMMWQNGGMSGLDQWNFVMHPV  
DAALTCDPDGAYVRKWCPEIAALPNDFI HQPWKCPPSILRRCGIKLGETYPNRVISDLEGAREQSLTDVVNV  
KKHPEFVDRRTGNDLVPLPDGLCPVITRKEFKYKLHHPKADNPHTAVLRGYRSRKRDEAIAFANERDFMAS  
AMNESVKLSERRLKATQYEAL

>Crassostrea\_gig\_XP\_011414696.2\_cry-1\_X1

MKTCAIHWFRKGLRLHDNPALQAACKVADDVKPVFI LDPWFANNANVGVNWRWRFL LQTLQNL DENLKKINSRL  
YIIKGPADVF PKLFKNWGVSHLTFEEDIEPYALTRDSA IKKLAEHNKVTSCVSHTL FDPQRIISKNGGKA  
PLTYQRLQTVLSSLGSPPKPVDSPSECKTKTESDHD KKYGVPSLEDLGKSEKECGPLLFPGGETEALRRLESM  
MGKKNWVCTFEKPKTAPNSLEPSTTVLSPYLKFGCLSPRMFYK LQEVYNKAKHTSPPVSLLGQLLWREFFYC  
VAVDTPNFDMEGNPVCKQIPWDTNESYLKAWKEGRTGYPFIDAVMTQLRQEGWIIHHLARHSVACFLTRGDLW  
INWEEGMKVFE EYLLDADWSLNAGNMMWLSASAFFHQYFRVYSPIEFGKKTDKDGDYIRKYVPQLSKYPTAYI  
YEPWKAPLKVQEKAGCIVGKDYPKPIVEHDKIRKKNIERMAQAYNASKTEGGAGAKRSDSSSSQKKKKAKVK

>Crassostrea\_gig\_XP\_011422754.3\_photolyase

MIRALRTFLYTHSTSKSCRRTFTLKAALLPPKHLEPFR LNSLCISDLSYSYPTVYWNANCFYLGVRKMSDK  
KKSKRKADTEELAKESSKKQKTEVTDSQGQGNGLIKQITESRKKLCE SVAEFKFNKKRIKVL SKVQDFPDGK  
NGVVYWMSRDQRVQDNWAMLYAQRLALKMEVPLHVCFC LVPKFLDATIRHYR FILKGLEEVEKECQELGISFH  
LLIGHAKDVLPSFVKDHI GGVTDF SPLRVP AEWVSAVSKALPSDIPLCQVD AHNVPWCWEASPKLEYGART  
IRNKIHNQLSQYLTEFPVSKHHPKPKAASQPV DWSKAEDSLEVDRKVTEVDWAVPGSTAGLNMLESFCHERL  
KYFGSDRNNPNKNALS NLSPWIKFGQISVQRCILTVRQYRSKYKESVESYIEEAIIRRELSDNFCFYNNYDS  
IDGAYDWAKQTLKVHADDERKYVYTKEQLEFAKTHDDLWNA AQKQMVLEGKMHGFLRMYWAKKILEWTPSPKV  
ALETAIYLNDKYS LDGRDPNGYVGCMWSICGIHDQGWKERDIFGKIRYMNYAGCKRKF DVAAFERKYKSKSIQ

>Crassostrea\_gig\_XP\_011441094.2\_cry\_DASH-1

MGTKGKTIICLFRNDLRIHDNEVLQWANRNAD FVLP MYIFDPRHFGGTYHFGFPKTGPHRTKFLLES IQDLRK  
NLKIRGSGLAVRKGK PHEELKKMIDMLGQSSVHSVVFHEEVTQEELDVEKSIKKHCGVNIKTFWGHTLYHSED  
LPFSPSQTPDVYTQFRKRVESQAPVRKCLDMPKSF RPLPEGVEEGE IPTNKDLGVEDPVT DPRSVDVFLGGES  
VAIDRLHHYLWETDAIATYKETRNGLLGADYSTKFSVWLALGSLSPRHIFWEVKRYENERTSNNSTYWVLFEL  
IWRDYFRYVAMKYGNQIFYEGGIQKNKIRWKQDKQFFRAWKEGKTGV PFVDANMRELAATGFMSNRGRQNVAS  
FLAKDLHLDWRLGA EWFESMLLDH DVC SNYGNWLYSAGIGNDPREDRKFN VVKQGF DYDSEG DYVRTWVPELK  
NVHGGSVHIVWTL SRGILEKAGVTLG ETPNPVHV APEWSRHYSKASGSGGARGGSSHRPQKGIDFYFKGGNQ  
RR

>Crassostrea\_virg\_XP\_022288154.1

MRRAFRTLLYTHSCSNHATICRTL TETSLICLIRFPKINRDRSLHHSCLSPQQLRLSDWINYCSNSQKRKMSDK  
KSQKRKMGEIEESIKESPKKQKTEVTDGQKGQTS LVLQIKEARENLCSSVAEFKFNKRRVRVLSKVQDFPDG  
KNGVLYWMSRDQRVQDNWAMLYAQRLALKMEVPLHVCFC LVPKFLDATIRHYR FILRGLEEVEKECKELGISF  
HLMIGHAKDVLPTFVKDNQIGGVITDF SPLRVP AEWVSGVTKTLPSDIPLCQVD AHNLPWCWEASPKLEYGAR  
TIRNKIHNQLNKYLTEFPVSKHHPKPKIPSEPV DWSKAEDSLEVDRKVKEVDWAVPGSTAGLNMLESFCHER  
LKFFGADRNNPNKNALS NLSPWVKFGQISVQRCILTVRQYRSKYKESVESYIEEAVIRRELSDNFCFYNEHYD  
SIEGAYDWAKQTLKVHADDKRDIYSKEQLEFAKTHDDLWNA AQKQMVLEGKMHGFLRMYWAKKILEWTPSPK  
IALETAIYLNDKYS LDGRDPNGYVGCMWSICGIHDQGWKERDVF GKIRYMNYAGCKRKF DVAAFERKYKSKLL

>Crassostrea\_virg\_XP\_022291740.1

MNHNQQEVVVHFRHGLRLHDNPALIEGLAEC DKFYPVFI DGEVAGTKTAGYNRYRFLLECLRDLD DNQAA  
GTRLYCFQGQPTDIFERLIEEWGVTKVTFEADPEPIWQ ERDRLVKDLDLDRNVQCVERVSHTLWDPHEI IQNN  
GGNPPLTFSLFNLVTSTIGVPPRPVENPDFTDISLPVSQNHDKQFGIP SLEDLNIRPECEEQNNRFMEWKGGE  
TKALELLEIRMKHEEQAYEKGYVMPNQYFPDLLSPPLSLSAHLRFGCLSVRN FYWRIHDKFKEVKPSVQALVS

LSAQLLWREYFYTMAVNNMNYDKMENNPICLNIPWYDNAEHEEKWTKGETGYPWIDAIMKQLRYEGWIHHVAR  
HAVSCFLTRGDLWLSWEVGLKVIFYKYLLDADWSVCAGNWMWVSSSAFEKVLQCPNCFPCVRYGKRMDPSGEYI  
KRYLPVLKDMPLRYLFEPWKAFLPVQQKAKCIVGVDPYPRPMVDHQVASKDCMKNMKAVKDALMGKEIPHCAPS  
EDMEARRFSWLPDHTPSGGKCTANFLCDGLMNMD

>Crassostrea\_virg\_\_XP\_022292416.1

MSTGSHAGGVLPPEQIGYIPDKLKAIEAFPYDTEAWSVLIRDAQMKPIEVARQVYERLVTQFPNAGKYW  
RIYIEQELKAKNFERVEKLFQRCCLKILSIDLWKLYLNYIKDTKGKLPSYREKMAQAYDFALDKMGMDIMSYQ  
IWVDYINFLKSVEAVGSAENQQITAVRKVFQRGVVNPMINIEGLWKDYCQYEQNINPLIAKKMTEDRGREYI  
NARRVAKEYEAVTRGLNKNLPSVPPQNNPDEAQQVDLWKKYIAWEKSNPLRTEDHALITKRVMFAYEQCLLCL  
GHHFDIWYEAATYLEQSSKILTEKGDQNAKMFADDEAGSIYERAVTTLMKNMMLVYFAYADFEESRMKYEKVH  
GIYKKLLVVQDIDPTLAFIQYMKFARRAEGIKSARQIFKMAREENRTRYQVFVAAAALMEYYCSKEKTVALKIF  
ELGLKKYGGIPEYLLCYMDFMHNLNEDNNTRVLYERVLSSGQVPPEKSIEIWSRFLAFESEVGDLASIQKVEK  
RRAQAIEKVQEFEDKDTALLIDRYKYLDLYPCTTSELKAVGYFDLARQQVVTLPASVTKVLEDEESKNKPQ  
YPKPDVEQMIAFKPRQIVPVGAHPVPGGEFPPPPAAANLISQLPPPDCFHGPFVIMDKFIEHFNQMVLPAPV  
GTENGIDGSFKLDPGTQLSIDFALGRKRKVTEGEDSDDEEGSEKHVVHWFRRKGLRLHDNPSLREALKGAATYRC  
VYILDPFWAGSSQVGINKWRFLQCLEDLTSLRKLNSRLFVLRGQPTDLFPKIFKEWNITTLSEEDPEPFG  
KERDSAIQMLAKEAGIEVIVRTSHTLYDLQKIIISMNGGSPPLTFKRFQSVLSKMEPPCEPEETVTSSFLEKKK  
TPITEDHDDKYGVPTLEELGFDTEGLGPAVFHGGEAEALTRLERHLERKAWVASFERPKMSQQSLFSPQNVLS  
PYLRFGLSARLFYWKLRRELYRKVKRKRIPLSLHGLLWREFFYTATNNPNFDRMKDNPLCVQIPWDKNPE  
ALAKWAEGKTGFPWIDAIMIQLRQTGWIHNLARHSVACFLTRGDLWISWEEGMKVFEELLLDADWSVNAGMWM  
WLSCSSFFQQFFHCYCPVGFGRADPTGDFIRTYLPVLKGYPAKYIYEPWTAPESVQRAAKCIIGKDYVPVMV  
NHAEVSKLNTGRMKQVYQQALALYASIAAVPKQIHSEEPSCNSKAMHSGNHPSRVAMIENTDHGNSQMSAEEG  
DNQHQFLAA

>Crassostrea\_virg\_\_XP\_022332471.1

MGTKGKTVICLLRNDLRIHDNEILQWANRNADFLVPLVYFDPRHFGGTYHFGFPKTGPHRTKLLIESVQDLRK  
NLKLRGSGLAARRGKPHEELKKVIDKLQSSVHVSFVEEVTQEELDVEKSIRKCCGVDIKTFWGHTLYHRDD  
LPFSPAQTPDVYTQFRKRVESQAPVRKCLDMPKAFKPLPEGVEEGEVPTNRDLGVEDPVHDPRSVDVFGGES  
VAIDRLHHYLWETDAIATYKETRNGLLGADYSTKFSVWLALGSLSPRHIFWEVKRYENERTSNNSTYVWLFEL  
IWRDYFRFVAMKYGNQIFFEGGIQNKSIWKQDKQLFQAWKEGRTGVPFVDANMREMAATGFMSNRGRQNVAS  
FLTKDLRLDWRLGAEFESMLLDHVCNSYGNWLYSAGIGNDPREDRKFNVVQKQGFQDYDSEGQYVVRTWIPELK  
NVHGGSVHIVWTLRGALEKAGVTLGETYPNPVHVAPEWSRHYSKASGGGGGGARGSSHKQQRGIDFYFKGN  
KRNMAEESLSERQEFELQALQAIYTGDDVLDLRVQDAWKVRRPPEIQITIKPQESFGNQGEHHVQVDLLVKCPE  
RYPEELPEFSFIKTKGLSNTQLSNLKSEVDSIARENKGEEMLLQIAQHVQQFLHANNKPPAKSFYEEMMLNKR  
KQEEQKEEEQRKELERLKKTEEKELQTLIEIQRRKEALKEENKKRKEETKQVDERPQSVSPSSSDSVPNV  
PVGTGPMVRRPRVSVPSPPLIVHNNETETRENKTRRQRTSTPCRDHLEEHTCQNHGTGGIVLAFSTKGERTIH  
RGACLGHGSSGNTVYVGIDTTSSELVTISEWVLKWRHYGRKKILRKEDGDEDKEGAACKQVNSIEQELLSLI  
RLHHPNLVHYLAIKYQQEPGKITLCLLMEYCSGTSLSVSIRKRPIHVTHIKYYTEEILNALAYLHNKDVVHK  
NLRASSIFLDATGKIKVADYSIERRLADLFYLLEQSRPGVHFDDNRPSQCRATKKGDSYGLGLVLLSLAIGEE  
VDESNLEIPTHFPSYFQDFLNKCLMKEDKSRWSVHQLLEHSFIKMALPLHLPITRHETQQEDESQDEDSDEE  
QPVITPYEASGQSRLTNEFEILKSLGKGGFGDVIVKRNKLDLRRFYAIKRIPLNPKSKQFNKKITREVKLLSRL  
NHENVVRYFNSWIELSDDPAHSESSSSSVSTTPKSTPKTPEKLTNTLDLSDDEKLAQPTVEESVEWSRSYSAI  
INPGWDSEEEDEADVFGTSFMLTDMSEDVVFVHVSVDNDELSIDQVDGENVKAGEESTLSPRLQYLYIQMEYCE  
KSTLRNCIDAGLYQDMNRVWRLFREIEGLVHIHEQGMHRLDKPVNIFLDSNDQVKIGDFGLATTSIISKSN  
ILDVKMLTSLAAGDNTESYSETTGDSLTGKVGTAIVSPPEMTGASKIVYTQKVDLYSLGIIFFEMCYKPLP  
TGMERVKILGNLRLPEINFPEDFDQYQLKGQTHIRWLLNHDPTRASTKDLLLSEHLPPQMEEEELDEILR  
STIADPLSKAYRHMLTALFSQNVNAADDLLFDSEIYKTKFSTNLPLVQEMVQEQMVRIFHHHGAVRVTTPLM  
PKCELYTKTDLYTRFMDHCGHLVSLPFDLRIPFVRYVARHNCTSVKRFCDKVFREKKVYGQHPRELTECAFD  
IITPNLGSFLPDAEVVLLVQEIISEFSVLQQRNYYIKINHMLVLQAILQHCGVTGDQMNDVLHILSGAKLDH  
YRNISKSLTSLGLSDQTVSTLLGILEMEGNYGKVASYLRCITKTRGEAASKAQGLHELEVILSNLDTLGLKL  
PVTVSLGFFVYNPQQFSGMIFQVMVDSKKKHSPDILAAGGCYDQLIEKFCSPLSHSPVESHGVSIAFEK  
IVQAMLDYKELTSTSSYDILVCTTIGHKPMKERMALVRLDLWAAGLRAEIIYLESMTQEEVQEFCSRSSGVSL  
VILKDDDPVAKVRSIEKDRITEKKFPSNALVVDLQQLQASSKQEQSDPPQVPPSKTLGMVTSSSDTGLSNH  
GNNILINFVNIENGKLASKSRYKYESQILAKVSSSTLSWLPKRSIDVIAVEFSAPVLKCIVAFLEVDGTDQEF  
EDSIGTVIEKQQRHYKKYIHKICDQIYHLKFEKRCNYIVLYGLKDDSIKLLT

>Crassostrea\_virg\_\_XP\_022335390.1

MKTCAIHWFRRKGLRLHDNPALLAACKAADDVKPVFILDWPFPKANVGINRWRFLQTLQNLDDNLKKVNSRL  
YVVKGKPNVEVFPKLFKHGVSHTLTFEEDTEPYAVSRDSEIQKIAKEHNVEVTLXVSHTLFDRTQRTISKNGGKA  
PLTYQRLQTVLSSMGSPKPVESPTKCQTKTEPDHDKKYGVPSLEELGKSPEDCGPXCIPGGEIEALRRMESM  
IQKKSWICSFEKPKTEPNLEPSTTVLSPYLKFGCLSXRLFYYKLQEVYSKAKHTSPPVSLHGLLWREFFYT  
VAADTANFDKMEGNPVCKQIXWDTNEEYLKAWKEGRTGYPFIDAIMTQLRQEGWIHHLARHSVACFLTRGDLW

ISWEEGMKVFEELYLLDADWSLNAGNWMWLSASAFFHQYFRVYSPIIEFGKKTDKDGNYIRKYVPQLSKFPAFI  
YEPWKAPLDIQKKAGCIIGKDYPKPIVNHQMRKKNIERMANAYNSNKTDDGGGEKKRSEASSVQKKKKRKVE  
>Crassostrea\_virg\_XP\_022341701.1

MEYEHGKEILHNFQTGGIDAEECFMIVSLDGYDATRHTFLRNIDFLRLTNPEKYKELVSIYATYFEKPPSET  
FLDPVGCSENGYLTSDFGYELEVELASALSLEDQKGNQPDKPSYVNVNHTVHNKPNNGSIPKRNANELQYK  
DSKETNHKQLLNRPSTSSQQHKKNNKKGGVAGQHMQPVIWFRDLRLYDNPALSEAASRNPVPIILVFIWSESE  
EDPQDILAAGGATKLWLHYALNELNRSISDKYTNKIIYRKTDSCQKEIMSLFEETGAKTLYINDVYEPFLKQR  
DDKFVXELQRKGIECKRFHSYLLHDPNSVSVSECVGMRGVGSVTHFMECCRLSTTQPIGRPLDYPGTLPKPNQF  
PPSLSLHELELAKMPKRKDGSMINWAAPIVEKWNFGEDGAWAELELFLSEGVRKYEKESCRADHLNTRISPY  
LHFGQISPRAVLEEARMKSPKFLRKLAWRDLISYLLSLWPDLPSPQTRVHYRDQAWSSNAHLKAWQGRGTG  
FPXVDAAMRQLWLEGWINNYLRHVVASFLISYLRHLWIEGYRWFQDTLVDADVAINAMMWQNGGMSGLDQWNF  
VMHPVDAALTCDDPDGAYVRQWCPEISALPNDFIHQPWKCPPSILRRCGIKLGETYPHRLTDLEGARDQSLAD  
VVNVVRKRHPEFVDRRTGNDLVPLPDGSCVPVITRKEFKYKLHHPEARDNPHTAVLRGYRSRNRDEAIAFANER  
DFMASAMNESIKLSERKLKSTQYQAL

>Crateromorpha\_mey\_CAZ66368.1\_cry

MTYNTLHIFTDDALRINDNNSLLSNLENTKNLYTVFYYGHIKKINHIPPHRVIFLLESKLNKERLDEYGIPL  
YFIDEPMFQSLRMLISKWNINRVTTPEPVSVIGKRDQLSLRNFLSAFGVMLRTYNSSTLYDVKVPVNITRSE  
FFRIITQMEPELSLPEELTEFLSKFSSFPDPFINKKIPSLSEFGITNETMSSIDTKFRGGETAAILQLEKLI  
NRCEPNNLPKVAQLNQYDAISPAIKFGCISVRTIYNRVSKLEPKYNEVKNIYDGLNRNDYCILVGGNCPNID  
NQGSIYTYILPWDVKQDASTRFQTGRTGYPFIDAAIAQLKREGFIHNSVKNILVRTLTCDLMWIGWHEGVRMF  
YKWSLDYNAACALSWMHGSKSTWLLLEEISISQINPIEEAKEIDKGDYIRKYLPELKDYPSEYIHTPWLA  
DQQIESECVIGQDYPYPNYCDVEERVQQCRKRLQIFYNIMPIAKKRRTLSLLKKRTRININNNDSVINIRAQL  
ECKATKLSQ

>Crocodylus\_porosus\_XP\_019407380.1\_PREDICTED:

MAASRSFASSVPALAGPCRAVHWFRGLRLHDNPALQAALRDAASVRCIYILDPWFFAASSAVGINRWRFLQ  
LEDLDNSLRKLNLSRLFVVRGQPTDVFPRLFKEWGVTRLTFEYDSEPFGERDAAIKLAKEAGVEVVENSHT  
LYDLDRIIELNGNKPLTYKRFQAIISRMDLPKKPVSSITSQQMEKCKAEIQENHDDMYGVPSSLEELGFPTDG  
LAAAVWQGGEMEALARLDKHLERKAWVANYERPRMNANSLASPTGLSPYLRFGCLSCRLFYYRLWELYKKVK  
RNSTPPLSLYGQLLWREFFYTAATNNPKFDRMEGNPICIQIPWDRNPEALAKWAEKGTGFPWIDAIMTQLRQ  
GWIHHLARHAVACFLTRGDLWISWECGVRVDELLLDADFSVNAGSMMWLSCSAFFQQFFHCYCPVGFGRRTD  
PSGDYVRRYLPKLKGFPSRYIYEPWNAPESVQKAAKCIIGVDYPKPMVNHAETSRLNIERMKQIYQQLSRYR  
LCLLASVPSCAEDLSGPVTDPAVQGCSTSTALKPSQSGQASPKRKHEGLEETCTEDLYKRVKVTGLHGPEIP  
SKSL

>Crocodylus\_por\_XP\_019388427.1\_photolyase

MFPKKQKQAAGADAGPSGCKRGRQDAQAAPGAESLAEVVEQARRRAAPSVREFKFNKKRVRLLSQESCLQDG  
ALGILYWMSRDQRVQDNWAFLYAQRALALKQQLPLHVCFCCLVPKFLEATIRHFGFLKGLREVAEECEGELGIPF  
HLLQGYAKDVLPGFVTRHGIGGVVTDFSPLRVPLQWVEDVKERLPQDVPLVQVDAHNIIVPCWVASSKQYEGAR  
TIRPKIHAQLPEFLTEFPVQHPFPAAAPAQPIDWDACYASLEVDRTVSEVKWAAPGTAAGLAVLQAFVTRR  
LPGYSEYRNNPNKAALSNLSPWFHFGQVSVQRAVLEVRKSRDRHRESVDSFVEEAVIRRELADNFCFYNKSYD  
QLEGAHWARDTLRLHARDKREYLYDLQQLLEEGKTHDQLWNAAQIQMVREGKMHGFLRMWAKKILEWTRSP  
DALRFAIYLNDRFELDGRDPNGYVGCMMWSICGIHDQGAERNVFGKIRYMNYAGCKRKFNVGQFEHKYRP

>Crocodylus\_por\_XP\_019400341.1\_cry-1\_X2

MGVNAVHWRKGLRLHDNPALCECIQGADTVRCVYILDPWFAGSSNVGINRWRFLQCLELDANLRKLNLSRL  
FVIRGQPADVFPRLFKEWNITKLSIEYDSEPFGERDAAIKKLASEAGVEVIVRISHTLYDLDKIIELNGGQP  
PLTYKRFQTLISRMEPLEMPVETITAEMVEKCTTPVSDHDEKYGVPSLEELGFDTDGLPSAVWPGGETEALT  
RLERHLERKAWVANFERPRMNANSLASPTGLSPYLRFGCLSCRLFYFKLTDLYKKVKKNSSPPLSLYGQLLW  
REFFYTAATSNPRFDKMEGNPICVQIPWDKNPEALAKWAEGRGTGFPWIDAIMTQLRQEGWIHHLARHAVACFL  
TRGDLWISWEEGMKVFEELLLDADWSVNAGSMMWLSCSSFFQQFFHCYCPVGFGRRTDPNGDYIRRYLPVLRG  
FPAKYIYDPWNAPEAVQKAAKCMIGINYPKPMVNHAETSRNLNIERMKQIYQQLSRYRGLGLLATVPSNPNGN  
NGGLMGYSPPGENVSGCSSAGSYFQASSILHFPHGDNQQSHLLQQGRTSLSSSISAGKRPNPEEETQSIGPKVQ  
RQSTN

>Crocodylus\_por\_XP\_019402505.1\_cry-2-like

MKHSCIHWFRKGLRLHDNPALLAAMKDCSDLYPIFILDWPFKPMQVSVNRWRFLIESLKDLDLDESLLKLNLSRL  
FVVRGHPAEVFPGLFKAWKVTRLTFEVDTEPYSKLRDAEVVRLAAAHGVQVIQKVSHTLYDTRIIAENNGKV  
PLTYRQLQAVLAGLSPKQPMPLAPTLETCLKDCCTPARDNHDPKYEIPTLEELQDQPKAGPRLYPGGESEALS  
RLDFHMKRMTWVCNFKKPDTEPNTLSPSTTVLSPIYKFGCLSVRTFWWKLAEIYRGKKHSSPPVSLHGQLLWR  
EFFYTAGAGIPNFRMEGNPICVQVDWDDNLEYVKAWKEGRTGYPFIDAIMTQLRTEGWIHHLARHAVACFLT  
RGDLWVSWEEGQKVFEELLLDADWSLNAGNWQWLSASAFFHQFFRVYSPVAFGKKTDKSGAYIKKYLPILRKF  
PAEYIYEPWKAPRSMQEQAGCIIGRDYPRPIVEHEAVSKRNIMRMKAAYAQRSHSKSAQVEKEGTTKGGKRL  
PAGPSVVELLTKKPKAKSS

>Crotophaga\_sulc\_\_NWS70718.1

KVDYDVCSNYGNWLYSAGIGNDPRENKRKFNMIKQGLDYGNGDYVRLWLPQLGLKGADIHSPWALTSAALSQ  
AGVTLGETYPQPVVTAPEWSRHMNQSLQGSSPHPRGRRAPAHTPAPHRNRGIDFYFSRKADV

>Crotophaga\_sulc\_\_NWS73616.1

MGVNAVHWFRKGLRLHDNPALRECIQGADTVRCVYILDPWFAGSSNVGINRWRFLQLCLEDLDANLRKLNSRL  
FVIRGQPADVFPRLFKEWNIAKLSIEYDSEPFGKERDAAIKKLASEAGVEVIVRISHTLYDLDKIIELNGGQP  
PLTYKRFQTLISRMEPLEMPVETITPEVMEKCATPVSDDHDEKYGVPSLEELGFDTDGLPSAVWPGGETEALT  
RLERHLERKAWVANFERPRMNANSLASPTGLSPYLRFGLSCRLFYFKLTDLYKKVKNSSPPLSLYGQLLW  
REFFYTAATNNPRFDKMEGNPICVQIPWDKNPEALAKWAEGRTGFPWIDAIMTQLRQEGWIHHLARHAVACFL  
TRGDLWISWEEGMKVFEELLLDADWSVNAGSWMWLSCSSFFQQFFHCYCPVGFGRRTDPNGDYIRRYLPVLRG  
FPAKYIYDPWNAPEVSVQKAAKCIIGVNYPKPMVNHAEASRLNIERMKQIYQQLSRYRGLGLLATVPSNPNGN  
NGGLMGYSPPGESISGCGSTAGQSNSFTQLGTGDGHTVVQPICALGDSHTGGSGIQQQGYCQASSILHYAHGDNQ  
QSHVLQAGRTALGTGISAGKRPNPEEETQSVGPKVQRQSTN

>Crotophaga\_sulc\_\_NWS77795.1

RFLQLSLEDLDNSLRKLNSRLFVVRGQPTDVFPRLFKEWGVTRLTFEYDSEPFGKERDAAIVKLAKEAGVEVV  
IENSHTLYDLDRIIELNGQKPPPLTYKRFQAIISRMELPKKPVSTVMSQQMESCKVDIQENHDDMYGVPSLEEL  
GFPTDGLAPAVWQGGETEALARLDKHLERKAWVANYERPRMNANSLASPTGLSPYLRFGLSCRLFYRLWE  
LYKKVKRNSTPPLSLYGQLLWREFFYTAATNNPKFDRMEGNPICIQIPWDRNPEALAKWAEGKTGFPWIDAIM  
TQLRQEGWIHHLARHAVACFLTRGDLWISWESGVRVFDELLLDADFSVNAGSWMWLSCSAFFQQFFHCYCPVG  
FGRRTDPSGDYVKRYLPKLGKGFPSRYIYEPWNAPEVSVQKAAKCIIGVDYPKPMVNHAEASRLNIERMKQIYQQ  
LSRYRGLCLLASVPSCMEDLSGPVTDASAGQGCSTSTPVRLSQTEQASPKRKHEGAEELCTEELYKRAKVTGL  
PAPEIPGKSL

>Crotophaga\_sulc\_\_NWS78428.1

DNWAFLYAQRALAKQELPLHVCFLVPKFLDATLRHYSFMLKGLQEVAAEECAELNIPFHLLLGCAKDVLPAFV  
VEHGVGGLVTDFCPLRLPRQWVEDVKERLPEDVPFAQVDAHNIVPCWVASPKQEYSARTIRGKIHAQLPEFLT  
EFFPVIRHPSHSPSCPAEPIAWEACYSSLQVDSTVKEVEWATPGTAAGLAVLQSFIAERLKFFGSHRNDPNRAA  
LSNLSPWFHFQGVSTQRAILEVQKHSKYKESVEAFVEEAHVRELAENFCYYNENYDNVQAYDWAQTTLKL  
HAKDKRPFLYGLQELEQGTTHDPLWNAQLQMVWEGKMHGFLRMWAKKILEWTRSPEEALRFAYLNDRYEL  
DGRDPNGYVGCLWSICGIHDQGWAERAVFGKIRYMNYAGCKRKFVGVGFERRYAPRT

>Crotophaga\_sulc\_\_NWS78782.1

MPHRTIHLFRKGLRLHDNP TLVAALESSEVVYPVYILDRFTLTSAMHIGNLRWHFLESLEDLQKNLCQLGSC  
LLVIQGEYESVLRDHVQQWNITQVTLDAMEPFYKDEANVRRLGEELGFEVLSRVGHSLYDTKRILDLNGGT  
PPLTYKRFLHILSLLDPEAPVKTPAEDFQRCRPPAPGLAECYRVPLPVDLEVPLENLSPPWRGGETEGLRRL  
EQHLTDQGWVASFTKPRITPNSLLPSTTGLSPFFSMGCLSVRTFFYRLSNIYAQAKHSLPPVSLQGQLLWRE  
FFYTVASATPNFTKMVGNPICLQISWYKDAEKLHKWKMAQTGFPWIDAIMTQLRQEGWIHHLARHAVACFLTR  
GDLWISWEEGMKVFEELLLDADYSINAGNWMWLSASAFFHQYTRIFCPVLFGRKTDPEGQYIRKYLPLVKNFP  
SKYIYEPWTASEEEQKQAGCIIIGEDYPPFMVNHKEASDHNQLMRQVREEQHRTAQLTRDDTDDPMEMNVKRE  
HSEEHPSKGVAKMTE

>Crypthecodinium\_coh\_QD016439.1\_6-4\_photol

MSAGVWFRKCLRLHDNAALTAAESSDSVIPFFILDPTFDRSKIGVNRHFHLESRLDLDEQLRERYNSRLIV  
FRGKPAEVLSELFEGSGEFLRGLSIFYERDIEPYARARDAVEDLAKKFKVPTMTFSGHTILDVDLVVQAPGFK  
PPIAMSSIQNLVKKHGPIPKATGAPKYLPAKLVKGGGHKYDVPDLAELYEEEEPTERHLMPPGGEREALARKRS  
CSDKDYIATFEKPKTESTGRQGAPWEPSTTGLSPYIKFGCISVRKVWHAIDDLCKGRKHSQPPMSLHGQLLFR  
EMFYVLGASVPNLDDKDKGNRMCKEIPWGHNQKVLSAWEEGRTGYPFIDALMRQLVQTGWMHHLGRHAVSCFLT  
RGDLWQNWNTAGRIDFDKYLLDSDWAINNGNWLWLAGVAPWSAPYFRIYDPCPGPKTSLNAVHSADFIRHFVPE  
LKGMPDRFLLTPWKAPDDVQKAAQCILGKDYKPIVDHKSAREGNLSRFKAALSNRTGSSSKLPEKFGQRKT  
DPGPMRVAYSDKSATSVLESQGASGSISTSGGGRVSAPEEDDDGRAKLKTGQAEAGALKRPAAVAAGGARKRP  
ATAATAAAATVTRGKSQ

>Crypthecodinium\_coh\_QD016452.1\_CPD\_photol

MATTSAAKKLFDVVALVDSRRCKINSIPFPDRPGPVVYWMMSRDQRSEDNWALLYAQGLAKQQKVPLHVVFCL  
VPKFLDATIRQFDFMLRGLREVEQDLISKDIPFHLKGLASNEVPAFCKEQEASAVVCDMAPLRVPMQWNTDV  
GNALADLNIPLVQVDAHNVPVWAASDKQEYAARTIRRKIMDSLPTYLKDFPPELKHDPDPAKDKWPKPVDWD  
LAECTLEVDRITVLPVKQFLPGMFEGKVLAEFCGSKLSKFADKRNDPNSDISSNLSPYLHFGQLAPQRAALAA  
RKAAEKDKKAYAKGCESFIEELVVRRELAENFCFYNPKYDKIEGASAWAQETLKAHQSDKREHIYTAQQLEEG  
KSHDDLWNAQLQLVREGKMHGFLRMWAKKILEWMPTPAEALAEAIRLNDRYELDGRDPNGYVGCMWSICGI  
HDMGWTERPIFGKIRFMNYAGCKRKFNIIPNFVKRYPGATKSVLTFPEAKKRKTD

>Crypthecodinium\_coh\_QD016498.1\_cry\_DASH,

MAGRLRCLWFRVDLRIDNPAALQAACRGSGNLLPVFVDFPKNFNVPTLAGARKSSARRAQFLLESVECLRKSL  
EKRGSGLAVGLGSAEDVFSKLCGDAQDIFLQESVCSEERSEEAREVEKRLKSKLQRVWGGTLYLPEECGQQPN  
NTPTLFTSFKNKAEGRGTIHQPIEPPKKLPQLPEDVANSLSYLPSLEDLGYSRDEAEAAKRS DPRGVLD

RGGEEAALARMQKWIWEDDRLQEYKEIRNGMLGEGFSSKLSPLWALGCMSPRRIYKEVQHYESERVKNKSTYW  
LIFELEWRDFFVYMAKTQGDKIFYKGGVVGDKAPWKNPKGALQRWKDGKTGDPLVDANMRELAATGFMSNRGR  
QNVASYLIFNLEVDWRHGAHFEEHLLDYDPCSNWGNWVAAAGLTGQRINKFNTKKQLNDYDPERRYVRHWLE  
ESKSSPTEMEVDEEGASSAGRRWAPKSQHDEKKGKGD

>Crypturellus\_undulata\_\_NWJ00429.1

DNWAFLYAQRLALKQELPLHVCFLVPKFLDATIRHYSFMLRGLQEVAKECTELNIPFHVLLGYAKDVLPAFV  
VRHGVGGLVTDIFYPLRVPQQWVEDVRERLPEDVPPFAQVDAHNIVPCWVTSSKQEYSAWTIRSKIHRQLPEFLT  
EFPFVIQHPYPPSTPAEPIAWEACDSSLQVDRTVKEVAWATPGTAAGLAVLQSFIAERLESYGSYRNNPNKAA  
LSNLSPWFFHFGQISTQRAVLEVRKHHRYQESVDIFVEEAVVRRELSDNFCYNNKNYDSVQGAYDWAQTTLKL  
HAKDKRPFLYKLQELEKGNTHDPLWNAQLQMVQEGKMHGFLRMYWAKKILEWTRSPPEALQFAIYLNDRYEL  
DGRDPNGYSRDADSVCCVCPAGCLWSICGIHDHGWTERAVFGKIRYMNYAGCKRKFDVQGQFERRYGPRK

>Crypturellus\_undulata\_\_NWJ00893.1

MPHRTIHLFRKGLRLHDNPTLLAALESSEAVYPVYILDRPFMASVMNIGALRWHFLLQSLENLQKNLLQLDSC  
LLVIQGEYESVLRDHVKKWNITQVTLDAEVEPFYKEMEAKIRSLGEEELGFKVLSLINHSYDQIRILDNDGT  
PPLTYKRFLHILSLLDGPEVPVRSPAEDFQRCRPSDLCLTECYRVPLPVDLKIPTESLSPWKGGETEGLQRL  
EQHLANQGWVASFTKPRITIPNSLLPSTTGLSPYFSLGCLSVRTFFYRLSNIYAQSKHSLPPVSLQGLLWRE  
FFYTVASATPNFTKMVGNPICLQINWYEDAERLHRWKAQTGFPPWIDAIMTQLRQEGWIHHLARHAAACFPTR  
GDLWINWEEGMKVFEEMLLDADYSINAGNMMWLSASAFFHQYTRIFCPVRFGKRTDPQGHYIRKYLPIILKNFP  
SKYIYEPWTASEEEQKEAGCIIQDYPFPMVNHKEVSDHNNLLMKQVREEQYRTAQLTRDDADDPMEMKMKRD  
HSEESIKKGKVARTTE

>Crypturellus\_undulata\_\_NWJ02641.1

RFLQLCLEDLDANLRKLNSRLFVIRGQPADVFPRFLFKEWSIAKLSIEYDSEPFGERDAAIKKLATEAGVEVI  
VRISHTLYDLDKIIEELNGGQPPITYKRFQTLISRMELPEMPVETITPEVMEKCTTPVSDDHDEKYGVPSLEEL  
GFDTDGLPSAVWPGGETEALTRLERHLERKAWVANFERPRMNANSLASPTGLSPYLRFGCLSCRLFYFKLTD  
LYKKVKKNSSPPLSLYGQLLWREFFYTAATNNPRFDMKMEGNPICVQIPWDKNPEALAKWAEGRTGFPPWIDAIM  
TQLRQEGWIHHLARHAVACFLTRGDLWISWEEGMKVFEELLLDADWSVNAGSWMWLSCSSFFQGFHCYCPVG  
FGRRTDPNGDIIRRYLPVLRGFPKFIYDPWNAPEVQKAAKCVIGVNYPKPMVNHAEASRLNIERMKQIYQQ  
LSRYRGLGLLATVPSNPNGNGGLMGYSNGENISACSSSTGGAQLGTGDAHAVDVQTCALGDSHAGASGIQQQ  
GYCQASSILHYAHGDNQQSHLLQTGRSLGTGISAGKRPNPEETQSIGPKIQRQSTN

>Crypturellus\_undulata\_\_NWJ08543.1

LLKVDYDVCNYSNWNLYSAGVGNDRGDRRFNTIKQGLDYDGSVDYVRLWVPELQELKGGDIHAPWALSGLSL  
AQAGITLGETYPQPVVTAPEWSRHIGPRPHRRGPHPKGREGPAHPPRQHKDRGIDFYFSRKKRL

>Crypturellus\_undulata\_\_NWJ09111.1

CIYILDPWFAASSAVGINRWRFLQLSLEDLDNSLRKLSSRLFVVRGQPTDVFPRLFKEWGVTRLTFEYDSEPF  
GERDAAIVKLAKAEAGVEVVIENSHTLYDLDRILNGLHKPPLTYKRFQAIISRMELPKKPVSSIVSQOMETC  
KVDIQENHDDVYGVPVSLEELGFPTDGLAPAVWQGGETEALARDKHLERKAWVANYERPRMNANSLASPTGL  
SPYLRFGCLSCRLFYRLWELYYKKVKNSTPPLSLYGQLLWREFFYTAATNNPKFDRMEGNPICIQIPWDRNP  
EALAKWAEGKTGFPPWIDAIMTQLRQEGWIHHLARHAVACFLTRGDLWISWESGVRVFDLDDADFSVNAGSW  
MWLSCSAFFQGFHCYCPVGFGRRTPSGDYVKRYLPKLKGFPSRYIYEPWNAPEVQKAAKCIIGVDYPKPM  
VNHAETSRLNIERMKQIYQQLSRYRGLCLLASVPCVEDLSGQVADPTLGQSSSTSTVMRVPQSDQASPKRKHE  
GAEELCTEELYKRAKVGLPAPEIPGKSL

>Ctenocephalides\_felis\_\_XP\_026474410.1\_LOW\_QUALITY

MEVDSKEEVVPGKHAVHWFRRLRLHDNPALLEALKGADTLRCVYILDPWAARGAGANALNKWRFLLESITDL  
DASLSRLDCRLHVVVRGQPADALPALLERWGVTLTSLYETDPEPYGRARDKLAARCRDNGVEIVEYESHTLYP  
LDSIIENNGGSAPVTFEQFLGVLTMTGPPDPAGPVRRDRFLFTTRTRVPTDPDYDQSYAVPTLSELGFANSS  
EPPVWRGGEAEALARLERHAEKRTLALNSSPNFDTLPPGFLLADGAGLSPYLRFGCLSCRLCYHQLADLAPAT  
KPLLQPPPAVMPLLLWREFLYCCGADNPRFDRVQGNPLCLQTPWDRDPTALAKWANGQTGFPPWIDAMSQRLSE  
GWIHHLARFALIDFLTKGALFISWEEGMKVFEEDLLDADWSTNAGSWLWLSLSCSSFFRKPAVPCPVALGKLVD  
PDAEYIRKYVPALRGFRSARLVHAPWLASREEQRRACRLGAQYPLPLLVDHARTKENARTRLACETLPGY  
RNRERLSESFQDESIDCNCEPVIKQQIAQDEPIMDTNIHLPDIRQEIKSLPEFESTINSLFI

>Cuculus\_canorus\_\_XP\_009568372.1\_PREDICTED:

MTAGRKPGTDWFRRLRLHDNPALQEALRDASSLRCIYILDPWFAASSAVGINRWRFLQLSLEDLDNSLRKL  
SRLFVVRGQPTDVFPRLFKEWGVTRLTFEYDSEPFGERDAAIKKLAKAEAGVEVVIENSHTLYDLDRILNGL  
HKPPLTYKRFQAIISRMELPKKPVSTVMSQOMETCKVDIQENHDDVYGVPVSLEELGFPTDGLAPAVWQGGETE  
ALARLDKHLERKAWVANYERPRMNANSLASPTGLSPYLRFGCLSCRLFYRLWELYYKKVKNSTPPLSLYGQ  
LLWREFFYTAATNNPKFDRMEGNPICIQIPWDRNPEALAKWAEGKTGFPPWIDAIMTQLRQEGWIHHLARHAVA  
CFLTRGDLWISWESGVRVFDLDDADFSVNAGSWMWLSCSAFFQGFHCYCPVGFGRRTPSGDYVKRYLPK  
LKGFPSRYIYEPWNAPEVQKAAKCIIGVDYPKPMVNHAETSRLNIERMKQIYQQLSRYRGLCLLASVPCVE  
DLSGPVTDSASGQGCSTSTAMRLSQPDQASPKRKHEGAEELCTEELYKRAKVTLPTPEIPGKSL

>Cuculus\_canorus\_\_XP\_009555905.1\_cry-1,\_par

VNAVHWFRKGLRLHDNPALRECIQGADTVRCVYILDPWFAGSSNVGINRWRFLQCLELDANLRKLNSRLFV  
IRGQPADVFPRLFKEWNIAKLSIEYDSEPFQKERDAAIKKLASEAGVEVIVRISHTLYDLDKIIELNGGQPPL  
TYKRFQTLISRMEPLEMPVETITPEVMEKCATPVSDDHDEKYGVPSLEELGFDTDGLPSAVWPGGETEALTRL  
ERHLERKAWVANFERPRMNANSLASPTGLSPYLRFGCLSCRLFYFKLTDLYKKVKKNSSPPLSLYGQLLWRE  
FFYTAATNNPRFDKMEGNPICVQIPWDKNPEALAKWAEGRGTGFPWIDAIMTQLRQEGWIHHLARHAVACFLTR  
GDLWISWEEGMKVFEELLLDADWSVNAGSWMWLSCSSFFQQFFHCYCPVGFGRRTDPNGDYIRRYLPVLRGFP  
AKYIYDPWNAPESIQKAAKCIIGVNYPKPMVNHAEASRLNIERMKQIYQQLSRYRGLGLLATVPSNPNGNGNG  
GLMGYSPGESVSGCGSTGGAQLGTGDGHTVVQPCALGDSHTGGSGIQQQGYCQASSILHYAHGDNQQSHVLQA  
GRTALGTGISAGKRPNPEETQSVGPKVQRQSTN

>Cuculus\_can\_XP\_009556633.1\_cry\_DASH-1

MTAICLLRCDLRAHDNQVLHWAQGIAGFVPLYCFDPRHYLGTHCHSFPKTGPHRLRFLLESVRDLRETLKKK  
GSTLVVRKGKPEDVVDLITQLGSVSAVAFHEEATQEELDVEKGLCQVCSQHGVKIQTFWGSTLYHRDDLPPFR  
PIARLPDVYTHFRKAVESGAKVRPTLQMAQDLKPLPPGVEEGCIPTMEDLGQKDPVTDPRTAFFPCSGGETQAL  
MRLQYYFWDTNLVASYKETRNGLVGMDYSTKFAPWLALGCISPRYIYEQIQKYEKERTANQSTYWVLFELLWR  
DYFRFVALKYGKRIFSLRGLQGKEISWKKDLQLFDCWKEGKTGVPFVDANMRELAATGFMSNRGRQNVASFLT  
KDLGLDWRMGAEWFYLLVDYDVCSNYGNWLYSAGIGNDPRENRKFNMIKQGLDYDNGDYVRLWVPELQGIK  
GADIHTPWALSKAALLQAGVTLGETYPEPLVTAPEWSRVHNQSLQGRSPHPRGRRAPAHTPVPHKNRGIDFYF  
SHKKDA

>Cuculus\_can\_XP\_009557709.1\_cry-1-like

MPHRTIHLFRKGLRLHDNPNTLLAALESSEVVYPVYILDRTFMSAMHIGNLRWHFLLQTLEDLQKNLCQLGSY  
LLVIQGEYESVLRDHVQQWNITQVTLDAEMEPFYKEMEVRIRRLGKELGFEVLSRVGHSYDTRKILDLNGGT  
PPLTYKRFLHILSLGDPMPVQTLTAEDFQRCPPAPGLAERYVPLAVDLKIPSENLSWRGGETEGLRRL  
EQHLNDQGWVASFTKPRITPNSLLPSTTGLSPYFSTGCLSVRTFFYKLSNIYAQAKHSLPSSSLQGQLLWRE  
FFYTVASATPNFTKMAGNPICLQISWYEDAELHKKWTAQTGFPWIDAIMTQLHQEGWIHHLARHAVACFLTR  
GDLWISWEEGMKVFEELLLDADYSINAGNMMWLSASAFFHQYTRIFCPVRFGKRTDPEGQYIRKYLPLVKNFP  
SKYIYEPWTASEEEQKQAGCIGEDYPFMVNHKEASDHNQLMRQVREEQQRQAQLTRDDTDDPMEMKVKRE  
HSEERTSKGKVAKMTEQTEIPAGISCWEPENGKEGEPEAS

>Cuculus\_can\_XP\_009563639.1\_photolyase

MGRVPAFPGLWERTGHRDGYQHSPGSGMGIGVGTISIPRALRVDRGLGTVPFSLVATTLLRASILAVLRMRGQ  
RKRKAEATEVPPVSRRRKEEEEEALQERRRAAPSVREFKYNKKRVRLVSQGSSELKEDARCILYWMSSRDQVRQDN  
WAFLYAQRLLALKQQLPLHVCFCCLVPKFLDATIRHYGFMLKGLQEVAKCAELNIPFHLLLGAKDVLPTFVVE  
HGVGGLVTDFCPLRLPRQWVEDVRQRLPEDVPFAQVDAHNIVPCWVASPKQEYSARTIRGKIHAQLPEFLTEF  
PSVIRHPHPPSPCPVEPIAWEACYSSLQVDRSVEEVEWATPGTAAGLAVLQSFITERLKFFGSHRNDPNKAALS  
NLSPWFHFGQVSTQRAILEVQKHSKYKESVDAFVEEAVVRRELAENFCYNNENYDSVQGACDWAQTTLKLHA  
KDKRPFLEEELEQGTTHDALWNAQLQMVREGKMHGFLRMYWAKKILEWTHSPEKALQFAIYLNDRYELDG  
RDPNGYVGCLWSICGIHDQGAERAVFGKIRYMNYAGCKRKFVGVGFERRYAPCMLSQ

>Cucurbita\_mos\_bluelightPa\_XP\_022960062.1

MDPNPQILENPEPISSSEDQSPVPVHSPFFAVASLTLSLSTVIPSNFLVQPRFSGLFSRQPNKDNVPTQAASL  
SHLPISCSSSLCPPKISLKSTVSANPLQIPLSLGPRRPSEPSNGAGMRRATIVWFRNDLRIHDNECLNSANND  
ISVLPVYCFDPRDYGKSSSGFDKTGPYRATFVIESVSDLRKNLQARGSNLVVRIGKPVTLAELAKEIGADGI  
YAHYEVSHDEMETEERIESAMKEENVEVKYFWGSTLYHIDDLPFKMEDMPSSHGAFRERVQGLSVRKTIEALD  
KMKGLPSRGDVEPGDIPSLSELGLNQPVAMSKEGWLPNTSQVGGETEALHRLQKYAAECRSQPPKATNNGAQ  
NSIYGATFSNKISPWLTMGCISPRSVFDELNKTVSRKHDGGNGTGTNWLMFELLWRDFFRFITKKYNSTKKQP  
NPSPATACTGALA

>Cucurbita\_mos\_XP\_022922402.1\_photolyase

MASTPSNSVQSGRIRVLKDVVTGSLDRPVGPVYWMFRDQVRKDNWALMHAVDEANRAKVPVAVAFNLFQFLG  
AKSRQLGFMLRGLQLQYDLEETLQIPFFLFQGEAEHTIPNFIRECEASLLVTDFSPLREVRKCKEEICKRVD  
ESVKVHEVDAHNVPPIWIASEKLEYSAKTLRGKINKKLPEYLIDFPALLIPTRKWPSTDKFIDWDRLIDDNL  
KGADVPEIEWCKPGEKAAMEVLMGSKDGLFTKRLKSYAIDRNNPLKPRGLSGLSPYLHFGQISAQRCALEARN  
VRKLNPPQAVDMFLEELIVRRELADNYCYQPHYDSLGLGAWEWARKTLMDHASDKREHVYTREOLEKAQTADPL  
WNASQLEMVVFHGMHGFMRMYWAKKILEWTRGPEEAEICIIYLNDKYEIDGRDPNGYVGCWWSICGVHDQGWK  
ERPIFGKIRYMNFAGCKRKFVDVDGYIAYVKRVVGEVKKRKAGEVVVDRKAKELRC

>Cucurbita\_mos\_XP\_022935871.1\_cry\_DASH,

MNTLRISFSSFPLLKTLPNSSSLKPAQIAANSAHRRIFVMNSSSKLDSRSSSSSICQVPGLESEEMDRIAEQM  
FRRYESPSSSSSVKRGKVAIVWFRNDLRLVDNEALYKAWISSEAVLPVYCVDPRLFGSTCYFGPKTGALRAQ  
FIVECLADLKRNLINRGLNLLIQHGKPEEILPSLAKALGAHTVYAQMETCSEELYVERMVSKGLKTVVLSPTS  
EKSAPSSARSPTLLLWVGTTMYHIDDLFPDNTSLPDVYTQFRKSVEAKCAIRDCIRLPALLGPPASIDNWGC  
VPSLDKLELQPPSVVKGMRFIGGESAAALSRIEYFWKKDLLRIYKETRNGLGPDYSTKFSPLWASGSISPRL  
IHEEVKRYEKEREANQSTYWVLFELIWRDYFRFLSVKYGNSLFHIGGPRKVESKWSQDKNLFESWRDGRGTYP  
LIDANMKELSTTGFMSSNRGRQIVCSFLVRDMGIDWRMGAEWFETCLLDYDPCSNYGNWYTGAGVGNDPREDRY

FSIPKQAQTYDPEGEYVAYWLPQLRMLPKDKRHFP GKMLYMEQVVPLKFGNAAR PQSQDYARRKNFGGRQAKD  
FKR

>Cucurbita\_mos\_XP\_022936701.1\_cry-1\_

MSGGGCSIVWFRDLRVEDNPALTA A VRSGAVVAVFIWAPEEEGHYY PGRVSRWWLKQSLALLDSSSLRSLGTF  
LVTKRSTNTISALLDVVKATGASQLFFNHLYDPLSLVRDHRAKEVLSAQGIGVRSYNADLLYEPWDVKDANGN  
PFTTFAGFWERCLSMPCDPEAPLLPPKRIISGDASRRCPCDTLVFEDESEKGSNALLARAWSPGWSNADKALT  
TFINGPLIEYSKNRRKADSATTSFLSPHLHFGEVSVRKVFHLVRMKQVLWANEGNEAGEESVNLFKLSIGLRE  
YSRYMSFNHPYSHERPLLGHLLKFFPWVVD EGYFKAWRQGR TGYP LVDAGMRELWATGWLHDIRVVVSSFFVK  
VLQLPWRWGMKYFWD TLLDADLES DALGWQYISGTL PDSREFDRIDNPQLEGYKCDPYGEYVRRWLPELSRLP  
TEWIIHHPWNAPEYVLQAAGIELGSNYPLPIVGLDAAKARLEEALSEM WQQEAAASRAAIENGTEEGLGDSSESI  
PIAFPQEITMEEEDVEPARMNAHTIRCYEDQMVP SMTSSVRLGDEPSLNIQST AEDGRAEVPINANLNQELTR  
NVVNPRVRPN DPTQTRLPYTPGIGLRTAAEDSTAESYSSSDVRRERDGGVVPVWSPSPSSSYTEQFVVEENGIG  
TSSSFLQGHQ QSHQIINWRRLSQTG

>Cucurbita\_mos\_XP\_022958759.1\_cry-1

MGCNKTIVWFRDLRIEDNPALTA AARDGFVYPVYIWC PKEEGQFY PGRVSRWWLKQSLAHLKQSLKSLGSDL  
VLMKTQSTIFSLLECINAIGATKVAFNCLYDPI SLVRDHNIKEKLVELGISVQSYNADLLYEPWDVYDENGNA  
FTTFKDYWGKCLLLQKEFISTLPPWK LQHAAGSVGSCCIEELGLENESEKSSNALLARAWSPGWSNADKALAE  
FVENHLL EYAKNRQQLGGSSTSLSPYLHFGEVSVWKVFQKVRMKQILWAREENAVGEQSTNLFLRAIGLREY  
SRYICFNFPFTHERSLLSSLKFFPWHASQNNFKAWRQGR TGYP LVDAGMRELWATGWIHNRI RVIVSSFAVKV  
LLL PWK WGMKYFWD TLLDADLES DILGWQYISGSLPDGHELERLDDPQIQGSKYDPDGEYIRHWLPELARMPT  
EWIHPWDAPQTVLKVSGVELGLNYPTPIVDL DLAANRLREAI IKMREIEAAAGANSNGTNEVVM DNADRIQS  
LGTANVVAEPKTCATYSSNDQKVPMIQTSKVDNPLSRKRSKPMEEKGEFQYNIRNDVQSEAGTSKPD EDL CST  
AESSSSKKPSTSRTSFSVPQFCSSSKGLPESSEGTDR

>Cucurbita\_mos\_XP\_022959592.1\_(6-4)DNA\_p

MRAAIQPFSLHCSTSNKFMA SNSSSLLWFRKGIRIHDNPALEYAAKGANCLYPVFVIDPHYMKPNPSAFSPGS  
SRAGLNRIQFLLES LVDLDMNLKKGSRLLVLHGEPGEVLIRCLEEWNVKKLCFEYD TDPYQALDSRVQNH  
SAAGVEVFSPVSHTLFNPADIIQKNGGRPPLSYQSFLKLAGEPSWARAPLSTTVSSLPVGDTRRSQILDVPT  
IRDLGYEDMGKVEWTFPRGGETEALKRLEESLSNKDWAKFEKPKGDPSAFLKPATTVLSPYLKFGCLSSRYF  
YQRVQDIYKNVKGHTTPPVSLVGQLLWREFFYTA AFGTPNFDRMKDNKICKQIPWKDDNELLAWRDARTGFP  
WIDAIMVQLRKWGMHHLARHSVACFLTRGDLFVHWEKGRDVFERLLIDSDWAINNGNWMWLSCSSFFYQYNR  
IYSPVTFGKKYDPNGDIYIRHFLPVLKDMPKQYIYEPWTAPLSIQKKAKCIIGKDYPEPVVSHDIATKDCRRKM  
AEAYELNKRNLNGMISEDLENLKR SSEEQSQKVQTKRKRQTIIDWIQAP

>Cyanidiococcus\_yan\_1,3-beta-gluc\_KAF6001014.1

MSLHFAFVLTTKATLPVLPYRQVGSAA RARRRYREHKLVLHLSVRHPLVMHGVSTLAEGSLERGGTFWSAQN  
GLEPAPMFIGADLGKNAEFGGKG GGVLLWFRSDLRLDDNPALSAALEEGSSVLPVYCFDPRQFGKTSFGFEK  
TGRYRARFLIESVADLRNALKKKGNNLLIRIGKPEEVL PDLCRKYEIKKVLHFQEVTFEELECEEAVTRLEE  
MKIEVRPFWTNTLYAVEDLPFPVEETPDVYTEYRLAVEQKSRVDP LSAPEEVRAIPRRVDYGTVP SLQELGL  
GDIPKSSEHGHMNATSSNIHNFRGGESEAQKRLAQYVQEAKLALTAGGDVERAAHLGADFSCKISPWLALGC  
VSPRRIFGEIRDQALNGSDGVQKSTTF FELVWRDFFRLITYKYSTSRLRKSEKAAGMPN RAPVAAAAS

>Cyanidiococcus\_yan\_KAF6000401.1\_cry

MFRRGMQSWGLVWFRNDLR LRDHEAFVTACKEHDGRVPIYVFDGRQVGP GAKTAVGGFSKCTPRAQFL LLD  
VQDLEDTLRQRYHGMQLIIYQNAYPEEVIPALITRLGSEKRVHITAVYYHQEVCVEEKAVEEALKVSLTNLYG  
HENATAVACRALRGSS TLYHPDDLPTASVAALPPVFTTW RKLVERCGRVRAPLAMVEPSQVHPLPFSIPCDR  
VPSSVRDLIGENCEQERFRQQLTWSLPTFS DMRMDARNAFPFRGGETASQERLQAYTFGSDAIARYKETRNL  
VGTEYSTKWSPYLAIGNITPRQIYHTLRQYEEMRPEKKGVSTYWA VFELEWRDFFRFAAMRYGNALFWRSGLR  
AVIQFELDKLSKHRRWRQDPVMLKTWQCGLTGFPFVDANQRELLATGWM SNRGRQNVASF LAKDLELDWRLGA  
EWFESLLLDYDPCS NYGNWQY CAGVGLDPRADRHFDVIRQARMYDPDGT FMAQWLPELASCTNWF DI PRIHSQ  
YPHYPRPVVSQ LNRGRKQIDAGFADRPKQVASEGSSQDRRRKPLAGARQREPRWMRRTHSGPADTMDTKTSSS  
EAKQTVLDHFGWSSKQRR

>Cyanidiococcus\_yan\_KAF6001522.1\_F1559\_0025

MLPRQALWIVQWKPVLESRQGSVLAWPWLHRVRIGVTLHCRSKRCRQH VNGTSQLPHLRFCLSRSSVFTSVCA  
QDRMP SRVEVKTESSVVEPERVHVANTKPIRPERRYVLYWVQASPRI PENHALEYA IERANSLRKPLVACFGV  
TDRYPEANIRHYRFLLEGLYELMHDLRSKRGIRLHVLYGSPDQVAAQCARDAACEVITDLGYMRVQRRWRESL  
AETLDCRLTLVESECVVPVALASEKHEFAARTLRPRIWKHIQRFCVPLSVQNLH HKDLDSVDYGPYAVLFGQ  
ASMTGAGTQHPVDSALEKLES LDRSVPSVSKYFRGGTSEAMRRLELFCTHKL AHYGQGRNHPEKDDTSCLSAY  
LHFGQISPI TIALAVWARKEAPRESRDAFIEELIVRRELSFNHCWYRPDDYDR LDSLDPDWIHR TKEEHRQDAR  
EHLYDLET LERARTHDPYWNAAQQEMVLTGRMHGMMRM YWAKKVIEWTPSWECA YDWLIYLN NKYELDGRDAN  
SFVGVLWSFGLHDRAHAERPIFGKLRWMSREGLERKFFPMHAYLERVNALARGMSWEEATASGLASRDAQTKSK  
KRPRR

>Cyanidiococcus\_yan\_KAF6001604.1\_F1559\_0040

MQPLECRLATFVAKPASLLRRHSSAEKSWLAQERASLFQNKQTQRGPLSFQKFGTSTRRAYLNMRTKRRSSET  
STTEARRPHPSGLASGRSAAGPSSASSSTTI IWLGRGDLRVYDNPLLVAHQREKQPLII IFTWSQADATGPF  
SYGDAQRAFMFSVIDELHRDLKRRYIQDIHYVRLRDQACASDYVELFDYLGKTLRANVLLLARRYEPWPQRQLD  
DEIEHALKTMNRWKVFSYNMHLLHEPGAVGYTGDSPATFGHFGTLLPFYRAWERNAGHPQPSEAVSWLPEAP  
QNLWPETFSATIGDVNASEVIPECRELSTSSFSLVPSLQSTGLHPVGAGVARWDITVMRSWDVREEAVRAQL  
RQFLQDRLPRYESSKSRADRQSVSRSLPFLALGVVSVREMYHETRDALRRLPEHKRSKTFARRLIWRELAYWT  
LHHFPEAAMEPIRSHYTTQEWNEDEPLIAAWQQGRTGYPLIDAGMRQLWQTGWMPQNIRMAVASFLIEYLNIIH  
WMHGLQWFHHTLVDLDAINAMMWQNAGRSGLDMWNFVIHPVTSSRTSDPTGAYVRQWIPELSQLPNEFIHAP  
WAAPESVRQAAAVRLGDTYPERIVNDLAEARRRSKRAVLEMRCRTEPHFFNDGDRIRVPILETGQSRLEHT  
GRSAGPHLYVVRHVFTTRREFRGAPFGTLLSEQAASTKAPQLQPVALQDTPAAQKGIAEEAS

>Cyanidiococcus\_yan\_KAF6002947.1\_cry-1\_

MPFDANALEESWQPGIDTVQLRLQHFLSVFPAYGDTRRRQRPQGGTSRLSPYLRFGELSPRRLYHAVRAFVL  
QCEPSDAIIRAARTLLKNLCMREYGYHLLFYRPSVVDRLVPEFEALPYARDEMCRYLEAWVSGHTGYPLVDA  
AMREL RHTGWLHANMRFLVASFFTKYLLLPWQLGARYLYKTLIDGDLASNSLQWQWVTGCNNDVFPLNCLVNP  
VVMGMRIDPDGEYCTNLVPRTEAYT

>Cyanidiococcus\_yan\_KAF6004024.1\_cry-2

MWVVMNGSSAVHWFRKGLRLHDNPALLDAVKNPATRYVLPVFCLDPVFLQPELVGVNRIQFLLECLQDLDRQL  
RQRRSRLFVLRGDPLEQFPFAFFRRYKTTLLTYEFDTEPYAKHRDERVRQLCTDLGIDVRTRATHTLYDPELVR  
CKLGERPTPLTYKSFYSFVTGTLGRPPASMPAPTTADDDIHTPDIELDAYKVPTLAELRAYDGLSVTTSFRGG  
ETEALAIMERFLTERQADVRAFSPKQTSPTAWPKASTQLSPYFKFGCLSPRLFIERVQELHPLEEPPVSLIG  
QIWWREFFTYVAYVTPNFHQMRGNRICRQISWREDRDDPLYRAWEEARTGYPWIDACMTQLRKEGWLHHLARH  
AVACFLTRGDLWVSWERGRETFRLLVDADYSLNSANWLWLSCSAFFHQYYRVYSPIGFPQKYDPNGDFVRHF  
LPVLREMPAKYIYTPWEAPLAVQRKAHCIIGEDYPSPIVDHATASRENMERMRKAVSESGPQRPPKRKRDDTG  
ASTSSPIP

>Cyclospora\_cay\_XP\_022589613.1\_photolyase

MPRGQPEGERICTGDKRRLEESATQLPGAGKHPQKKGCESETSSSLCWLKDSSVDHRRVRCLTPARTQPNTLGK  
TVVCLLQRDLRLQDNWALLFAQEAAALTGLTPLYVLHLVIPGHTFQPTIRHVSFHLSSLEEFATDLANQSIGFR  
CIPISTADDDKASTCEARSCIESTVTELKPCMLMVCIDLMPLRPSELVKQAANVCVTKGQCPLYQVDSHNIVPV  
WLASDKQEYSARTFRVRVTRFLREFACEIPRIGQHPHKLQTEDGQTLKIPDILNRLKLDHVSRLPSQWLPGSK  
AGLAALQEFCRPRLLAYASRNDPLERGQSGLSPLWHFGQLSSQRCLLTINSLGPGTKIGALAAAARESFIEE  
LVVRRELAENFIFYNSKYDEIQGAPKWAQDTLNAHRGDKREHIYSLSHFEGAKTHEALWNAQLQLVHDGKMH  
GFMRMYWAKKILEWAASPEALKISLHLNDKYSLDGTDPNGVVGCMWSIAGVHDQGWAERPFIKGKVRYMNLG  
CKRKFSVDEFIRRTSVVAATALKVAKKG

>Cygnus\_atratus\_XP\_035395284.1\_cryptochro

MAAAAAAPSRSVHWFRRGLRLHDNPALQAALRGAASLRICIYILDPWFAASSAVGINRWRFLQSLLEDLDNSLR  
KLNSRLFVVRGQPTDVFPRLFKEWGVTCLTFEYDSEFPFGKERDAAIVKLAKEAGVEVVIENSHTLYDLDRIE  
LNGNKPPLTYKRFQAIISRMELPKKPVSSVTSQOMETCKVDIQENHDDVYGVPSLEELGFPTDGLAPAVWQGG  
ETEALARLDKHLERKAWVANYERPRMNANSLASPTGLSPYLRFGCLSCRLFYYRLWELYKKVKRNSTPPLSL  
YGQLLWREFFYTAATNNPKFDRMEGNPICIQIPWDKNPEALAKWAEGKTGFPWIDAIMTQLRQEGWIHHLARH  
AVACFLTRGDLWISWESGVRVFDELLLDADFSVNAGSWMWLSCSAFFQOFFHCYCPVGFGRRTDPSGDYVKRY  
LPKLKGFPSRYIYEPWNAPESVQKAAKCIIGVDYKPMVNHAETSRLNIERMKQIYQQLSRYRGLCLLASVPS  
CVEDLSGPVADSASGQGSSTSAAVRLPQSDQASPKRKHEGEELCTEELYKRAKVTLGPASEIPGKSL

>Cygnus\_atr\_XP\_035400705.1\_photolyase

MPRGSGKRKASGGGEAAKREEEEEEEAAGRLEAALREARRAAAPSVREFRYNKKRVRLVSRGPPELREDAKC  
ILYWMSRDQVRQDNWAFLYAQRLALKQELPLRVCFCLVPKFLGATIRHYGFMLRGLQEVSKECTELNVPFHLL  
LGYAKDVLPPFVVQGVGGLVTDFCPLRVPRQWVEDVRERLPEDVPFVQVDAHNIIVPCWVTSPKQEYSARTIR  
GKIHSQLPEFLTEFPFVIRHPHPSPCPTPIAWDACYSSLQVDRSVAEVEWATPGTSAGLAVLQSFIAERLKS  
FGSQRNDPNKAALSNLSPWFHFGQVSTQRAILEVQKHRAHAKESVDAFVEEAVVRRELADNFCYYNENYDSLQ  
GAYDWAQTTLKLHAKDKRPFYELQQLEQATTHDPLWNAQLQMVRREGKMHGFLRMYWAKKILEWTRSPPEAL  
RFAIYLNDRYELDGRDPNGYVGCLWSICGIHDQGWKERDVFVKIRYMNYSGCKRKFDVDQFERRYAR

>Cygnus\_atr\_XP\_035410259.1\_cry\_DASH-1

MARAAVCLLRCDLRAHDNQVLHWAHNNADYIIPLYCFDPRHYVGTHCYGFPKTGPHRLRFLLESVKDLRETLC  
KKGSTLVVRKGPEDVVSDLITQLGCVGVAFHEEATQEELDVEKGLCQVCGQHGVKVQTFWAATLYHRDDL  
FGPIARLPDVTYQFRKAVESEAKVRPTLQLADQLKLAPGVEEGCIPTMEDLGQKDPGTDPRTAFCPSGGETQ  
ALMRLQYYFWDNTNLVASYKETRNLIGMDYSTKFAPWALGICSPRYIYEQIRKYEKERTANRSTYWVLFELL  
WRDYFRFVALKYGRRIFSVRGLQSKEVPWKKDLQLFDCWKEGKTGVPFVDANMRELAATGFMSNRGRQNVASF  
LTKDLGLDWRMGAEWFEHLLVDYDVCSNYGNWLYGAGVGNDPRDNRKFNMIKQGLDYDNGDYVRLWVPELRC  
VKGAAAHTPWALSSAALSQAGVTLGETYQPQPVVTAPEWSRHISQRPQGRSPHPRGRRGPARTPAQHKDGGIDF  
YFSRKKDV

>Cygnus\_atr\_XP\_035425030.1\_cry-1-like

MPRRTIHLFRKGLRLHDNPALLAALESSEVVYPVYILDRKFMTSVMHIGALRWHFLLQSLEDLQKNLCRLGSR  
LLVIQGEYELVVRDHVQKWNITQVTLDAMEPFYKEMEANIRCLGEELGFKVLSVVGHSYDTRKILDLNDGA  
PPLTYKRFLHILSLLDGPEAPVRNLTAEDFQRCRPPDLDLAECYRVPLPADLKIPPESSISPRWGGETEGLQRL  
EQHLADQGWVANFTKPRITILNSLLPSTTGLSPYFSMGCVSVRTFFYRLSNIYAQAKHHSLLPPVSLQGQLLWRE  
FFYTASATPNFTKMAGNPICLQISWYEDAERLHKWKTAQTGFPPWIDAIMTQLRQEGWIHHLARHAAACFLTR  
GDLWISWEEGMKVFEELLLDADYSINAGNMMWLSASAFFHQYTRIFCPVRF GKRTDPEGQYIRKYLPLVKNFP  
SKYIYEPWTASEEEQKQAGCIIGKDYPPFMDVHKEASDRNLQLMKHIREEQYRTAQLTRDDTDDPMAMKLKRD  
HSEENVTKAKAARMTEQT

>Cygnus\_atr\_XP\_035425130.1\_cry-1

MGVNAVHWFRKGLRLHDNPALRECVQGADTVRCVYILDPWFAGSSNVGINRWRFLQCLEDLDANLRKLNSRL  
FVIRGQPADVFPRFLFKEWNIAKLSIEYDSEPF GKERDAAIKKLASEAGVEVIVRISHTLYDLDKI IELNGGQP  
PLTYKRQFTLISRMEPLEVPVETITPEVMEKCTTPVSDDHDEKYGVPSLEELGFDTDGLPSAVWPGGETEALT  
RLERHLERKAWVANFERPRMNANSLLASPTGLSPYLRFGCLSCRLFYFKLTDLYKKVKKNSSPPLSLYGQLLW  
REFFYTAATNNPRFDKMEGNPICVQIPWDKNPEALAKWAEGRTGFPWIDAIMTQLRQEGWIHHLARHAVACFL  
TRGDLWISWEEGMKVFEELLLDADWSVNAGSMMWLSCSSSFFQQFFHCYCPVGFGRRTDPNGDYIRRYLPVLRG  
FPAKYIYDPWNAPE SIQKAAKCIIGVNYPKPMVNHAEEASRLNIERMKQIYQQLSRYRGLGLLATVPSNPNGNG  
NGGLMGFS PGESISGCGSTGGAQLGTGDGQTVGVQTCALGDSHAGTSGIQQQGYCQASSILHYAHGDNQQSHL  
LQAGRTSLGTGISAGKRPNPEEETQSVGPKVQRQSTN

>Cynoglossus\_semi\_XP\_008306150.1

MARSSRTVICLLRNDLRLHDNLFHWAQRNAENIVPLYCFDPRHYVGTYNYNFPKTPGFRLRFLLESIRDLRN  
TLISKGSNLVVRGKPEDVVAELIQQLSISTVVFHEEVTSEELNVEKKIKDVCAQMRVKVHTCCGSTLYHRD  
DLPFRHPSELDPVYTQFRKAVETRGRVRSVFPTPDQLKPPPPGLDEGVIPTAEDLQQTEPLSDPRSAFPCTGG  
ESQALARVQHYFWDTNAVASYKETRNLGMVDYSTKFAPWLAIGCISPRYIYHQIKQYETERTANQSTYVWIF  
ELLWRDYFRFVAVKYGNRLFQVKGLQDKSVQWKQDMRLF TAWKEGRTGVFPVDANMRELALTGFMSNRGRQNV  
ASFLT KDLGLDWRMGAWEFYEYLLIDYDVC SNYGNWLYSAGVGNDPRENKRKFNMKQGLDYDSNGDYIRQWVPE  
LQRIVGADVHTPWTLSAALSHAQVTLGETYPTPIVVAPEWSRHVNKKSSASGPSPRGKKGPSHTPKQHRDRG  
IDFYFSKSKNL

>Cynoglossus\_semi\_XP\_008309446.1

MAVNSVHWFRKCLRLHDNPALQEAVNAAHTLRVYILDPWFAGAANVGINRWRFLGAELEDLNSLKKFNSRL  
FVIRGQPTDVFPRFLFKEWKVTRLTFEYDPEPYGKERDGA I KMAQEFGVETVVRNSHTLYNLDR I EMNNNSP  
PLTFKRQFTIVSRLELPRRPLPVITQQQMEKCCTKISENHEQLYSIP SLEELGFRTERLPPAVWRGGESEALD  
RLNKHLDKKVWVANLEHSRINTCSLYASPTGLSPYLRFGCLSCRVLYYNLRELYMKLRKHSSPPPSLFGQLLW  
REFFYTAATNNPNFDRMEGNPICVQIPWDQNPEALAKWAEGRTGFPWIDAIMTQLRQEGWIHHLARHAVACFL  
TRGDLWISWESGMKVFEELLLDADWSVNAGSMMWLSCSA FFQQFFHCYCPVGFGRRTDP SGDYIRRYVPILKD  
YPNRYIYEPWNAPE SVQKAANCVVGVDPKPKMINHAEGSRLNIERMKQVYQQLSHYRGLS QLASVPTIQEEAE  
PPMTDESQTSSGPDSP PAGGALTEAAGCSILPDSSTLCPTVVTAHQSSDCPQTSAAVTST SASVNADPLKPPS  
PCSSSSSPCGTTSPPSTSAQTLTKRKGPAHKIRRSMRQRGHQGAERREDEEDKGREERMEDDDDENEESEMEQ  
DATGEMSGHRQ

>Cynoglossus\_semi\_XP\_024911595.1

MVMTHNCIHWFRKGLRLHDNPALVSALRDCKDLYPVFVLDPHLYNSDHMGINRWRFLVGCLHDLDCSLRKLKS  
RLFVLRGHPEDVFPELFKKWDVTKLTYEYDTEPYSLSRDGKVT ELAERHGVVEVYKISHTLYDMDRVIEENNG  
KAPLTYNRMQAILKSLGPPKKPVPAPTLEDMNEIKTPY TENHEEEYGIPPLGELCEDTAAPGEEKFP GGGEEEA  
LRLDEHMKRTAWVCKFEKPQTS PNLSPSTTVLSPYVTFGCLSARTFWWRLAGGYQGNKHSSPPVSLHGQLL  
WREFYYAASVGIPNFNKMVGPNVCTQVDWDSNELLA AWREARTGFPFIDAIMTQLRQEGWIHHLARHAVACF  
LTRGDLWINWEEGQKVFEKLLLDGDWALNAGNWLWLSASAFFHQFFRVYS PVAFGKKT DKNGDYIKKYLPLLK  
KLXYIYEPWKAPCSVQQAAGCIVGKDY PQPIVKHEE IHKKNIQRMKLAYAKRSSDA AVSPNKKQGLKRKASSV  
ADLLQSKGKKK

>Cynoglossus\_semi\_XP\_024915112.1

MARNSIHWFRKGLRLHDNPALREAVRGADTVRCVYFLDPWFAGSSNVGNRWRFLQCLEDLDASLRKLNSRL  
FVIRGQPANVFPRFLFKEWKISRLTFEYDSEPF GKERDAAIKKLAMEAGVEVNVKISHTLYDLDR I IELNGGQP  
PLTYKRQFTLISRLDPPEMPAETMTDSTMGGCVTPI SDDHGDYGVPSLEELGFDTEGLPTAVWPGGETEALT  
RIERHLERKAWVANFERPRMNANSLLASPTGLSPYLRFGCLSCRLFYFKLTDLYRKVKKNSSPPLSLYGQLLW  
REFFYTAATNNPRFDKMEGNPICVRI PWDKNPEALAKWAEAKTGFPWIDAIMTQLRQEGWIHHLARHAVACFL  
TRGDLWISWEEGMKVFEELLLDADWSVNAGSMMWLSCSSSFFQQFFHCYCPVGFGRRTDPNGDFIRRYLPVLRG  
FPAKYIYDPWNAPE SVQAAAKCVIGVHYPKPMVHHAEEASRLNIERMKQIYQQLSRYRGLGLLASVPSTNGNGN  
GGMMAYSPGEQQPGTNGNSNTVHLPAVSGSSVATSN GSGSILLNFDSEEQTRPNSVGQRQQPLQQ

>Cynoglossus\_semi\_XP\_024921971.1

MTVISRSLSPTPAKSSLLKLLACTSSSLSKVLSLLVEKFTCKAAMLSTKRKASSAAKAPKAKQQKGPPVKEEEK  
KKKKPESGGWLQNLVMQKRTKQKEMEFNQKRLRFIRD AKIKRGSAGVVYWM LRDQRVQDNWALIFAQKLAARK  
NLPLHICFCLMPKSTLSTLRHYSFMLKGLKEVAKECKALNVQFHLLHGSAAEVLPGFVSSHSLGAVVTDFSP

LREPLQWLEDVEKRLPTDIPIIQVDAHNIVPCWVASPKLEYAARTIRGKITKHLTEFLTGFPLVERHPFTARE  
KAKKIDWDQTLSSSLKVDRTVKETNWAQPGTCGGMAMLESFIDFRLKLFNGQRNDPNINALSQLSPWIHFGHLS  
AQRVALQVQKNGKSAAESVTSFIEELVVRRELADNFCFYNNKKYDRVEGAHEWAQKTLRDHAKDERPYLYTLQE  
LEKAKTHDNLWNAAQYQMVREGKMHGFLRMYWAKKILEWTSSPEEALSIALYLNDRYELDGDQDPNGVVGCMWA  
ICGVHDQGWAERPVGKIRYMNKYGCTRKFNVAQFEQKYCPQKCQKLRRF

>Cyprideis\_toro\_\_CAD7224866.1

MGLYGEILSHILEWDCMARFFLILEWNSVVAADFSPKIALQWIEGVKGALDKMDVPLIQVDAHNVPVWETS  
KQEYAARTIRRKIHDLKEFGTEFPPLVPHPAKEAAERIDWQALYDWLEVDESIGPVKWATPGTAAGLRVLEE  
FLTKRMKKYEKRNDPNEEALSNLSPWFHYGQVAPQRAILEVSLSRKANPKAADS FIEEALVRRELSDNFCFY  
PRYDSIEGAADWARKTLNDHKNDVREYLYSFEEFEGSRTHDDLWNAAQIQLVREGKMHGFLRMYWAKKILEWT  
TSPEEALAFAIKLNKLYELDGRDPNGFVGCMWSICGIHDQGWTERPIFGKIRYMNAYAGCKRKFVVKFVNKYG  
AKAYPYNKGGRKVAAGGSTSAAASTSRKRASTPAKSTAAKKAKK

>Cyprideis\_toro\_\_CAD7229706.1

FLLEALEDLDRSLRKLNSRLFVIRGQPADVLPKLYKDWQITHLTMEAEPEPFGRARDKNI I AISREYGVHVS I  
KTSHTLYRLDSIIERNGSVPVPTYRQFQLILQSMDDPPPPVAAVTMDTVGSSKTPLRQDHEDEYGVPTLEELG  
FEVEAKDHSSALWVGGESEALSRLERHLERKAWIASFGNPKFSPQSLMASQTGLSPYLRFGCLSCRLFFQELT  
KLYRQVRKSPPPVSLYGQLLWREFFYTAATKNPKFDRMVGNPICLQIPWDKNPQALAKWATGNTGFPWIDAIM  
RQLRIEGWVHHLARHALACFLTRGDLWLSWEDGMKVFEELLLDSDWSINAGTWMWLSCSSFFQTFHSHYCPVK  
FGRKADPSGDYIRKYVPVLKNFPTEYIHEPWIAPLEVQQQAKCVIGRNYPLPMVNHAEASRRNFERLRQVYRS  
LPRPGGFSVFRMDQKPSARPFRAPPPPLPARGAHLISAKLQQAASILSTPSSTTKHEPPKFFVDLLTGDEPS  
VAAQTNSSSSIRSRSQATSARKKVPPPRPPPPKKKVTPVSGISAKSDVLVDIGSDGGSIHSSGSDAGSGPQFP  
PSSMSVVDADFDFSPVSWGQRSSSFSTVSVASLSNSAPQRSSSLYSRPPAAPSSGAPSSVLSDLRDIQSSSLAS  
SNHPSPTVFGNGTQGVNWTATSSNATGVQSRSTSVKRDSPVTRKAFEDETLITSASNAVADLPKWKPTVI  
RARPISTPPVSTTVQTSTVSSTTSASITSATSIGENMNGSRTPELTAKSWSVSTDLSLATASSSTLSAGPSLPP  
RPKTSEIPYAVALYDYGSGNPEDLVFKAGDTILLHHWINEDWLEGSISGVTGMFPANFIQAGVLVHVVTGKINK  
EWLTGSYRGFRGQFPVSFVSHVPKRFRES

>Cyprideis\_toro\_\_CAD7232001.1

MGLIGYNRMFLCECLRDLDAGFRLYGGRLFVVESKMPHVLQQLSKEFRIEKITWDQDCEALYHPRDDAVKET  
CETLGIAWIERLGH TLWNPEDILEANGEEPPLTQAAFLQVATSLGHDPDRPRGKVDLSVSLKSDGVSDGLKK  
ELKLFDGVPDPADFGFRATRPHEPTYWMGGECEGLDLLSRLEQEARAFQDGCIRVTQTRPNILAPATSLSPY  
LRFGCVSVRMYWEIQDLYEVRGGASTAHVHLIDQLIWREFFYVMSARNPHYDKMEENPICLNIRWDDDPVA  
LACWEEGMTGYPLIDAFMRQLKEEGWIHHLGRNLVAQFLTRGAMWLSWVPLRHLRYQLDADWSVCSGNWMW  
ISSSAFEKVLDCSHCLSPVTFGRLEPSGEFVRRYPPELQNFPTIEWIYQPWQAPESVQEKS GCVIGKDYPLPI  
VDYAQASQRCRYVSFQKNVIMNLSFYLRIFE

>Cyprinodon\_variegatus\_\_DASH\_XP\_015255163.1

MSASRTVICLLRNDLRLHDNELFHWAQRNSEHIVPLYCFDPRHYVGTYNFNLPKTGPFRLRFLLESVRDLRNT  
LLSKGSNLVVRKGKPEEVVADLIKQLGVS SVSAFHEEVASEELNVEKKVKEVCAQLKVQVHTCWGSTLYHRED  
LPFFHISRLPDVYTEFRKAVESKSRVRPVLPTPERLNPLPPGLEEGAIP TAEDLQQTEPVSDPRSAFPCAGGE  
SSVLARLQHYFWD TDAVATYKETRNGLIGVDYSTKFS PWLALGCISPRYIYHQIKKYERERTANQSTYWVIFE  
LLWRDYFKFVGKYGKMKFQLKGLQGKSVPWKMDTKLFD AWKEGRTGVPPVDANMRELALTGFMSNRGRQNV  
SFLTKDLGLDWRLGAWEFEYLLIDHDVCSNYGNWLYSAGIGNDPRENKFNMIKQALDYDNNGEYVRRWVPEL  
GAIRGPDVHTPWNLSASLSHAGVSLGETYPTPMVTAPEWSRHF GKKGPSGAGSPKGGKGP SHHPKQHRDRGI  
DFYFSKSKNL

>Cyprinodon\_vari\_\_XP\_015226684.1

MGVNTIHWFRKGLRLHDNPALRASIQRADTLRCIYILDPWFAGSSSVGINRWRFLHLCLEDLDASLRKLNSRL  
FVIRGQPTDVFPRLFKENITQLSYEYDSEPF GKDRDAAIQKLASEAGVEVIVRISHTLYNLDEIIEVNGGQP  
PVTYKRFQGLINRMDDVEQPAETISSEMLKNCITLVTDHDDKFGVPSLEELGFETEG LSTAIWPGGETEALK  
RLERHLERKAWVANFERPRMNSNSLLATPTGLSPYLRFGCLSCRHFFRLTDLYKKVKKNSNPPLSLYGQLLW  
REFFYTTATNNPCFDMEGNPVCLQIPWDRNPEALAKWAEGR TGYPWIDAIMTQLRQEGWIHHLARHAVACFL  
TRGDLWISWEEGMKVFEELLLDADWSVNAGSWMWLSCSSFFQGFHCYCPVGFGRRTDPGGDYIRRYLPVLRG  
FPAKYIYDPWNAPEEVQKAAKCIIGTNP KPMVNHGESSRVNIERMKQIYQQLSCYKGLGLLATVPANPNSNS  
SIGDVSTGSAHYQKGFFEIHPSQEETSQTERRQSTLKRHHKEKTEPECSFKSWKQRK

>Cyprinodon\_vari\_\_XP\_015226847.1

MSDKKRKAPSAAEQGPSAKQPKKEKAAGWLESQVKQQREEKKDMKFNKKRQRFLTDSQKMKQGSEGVLYWMLR  
DQRVQDNWALIRAQQLAAKEEVPLHVCYLLVPKSELSTLRHYAFLKGLEQVAKACKKLN IQFHLLHGAPGE  
VLPGFVSDQGF GAVTDFSP LREPQQWLN AVKKKLSKDIP LIQVDAHNIVPCWVASPKLEYSARTIRGKITNL  
LPEFLTDFPPVEKHAHTATRTAKPVDWEQTLSSLDVDR TVGEPEWAKPGSKAGMAMLESFIDVRLKLFATQRN  
DPNMAALSQ LSPWIRFGQLSAQRVALQVRRCGKNAGESVAAFIEELVVRRELTDNFCYYNEKYDQVEGAYEWA  
QKTLKDHA KDKREYIYTREQLEN AKTHDKLWNGAQYQMVTEGKMHGFLRMYWAKKILEWTR SPEEALSIALYL  
NDRYELDGDQDPNGFVGCMWSICGIHDQGWAERAVFGKIRYMNKGC LKRFDVARFERKYRPKTA

>Cyprinodon\_vari\_\_XP\_015227078.1

MAHVCIHWFVRKGLRLHDNPALIAALKDCKELYPVFIMDPNLHSTEVGINRWRFLIGALKDLDSSSLRKLNLSRLF  
VLRGKPEEVFPKLFSSKWKVTKLTYEYDTEPYSLSRDEKVTSLAKETGIDVIYKISHTLNFNIERIEENDGKPP  
LTYKRLQAIVAKLGPPKKPIPAPTLDDMKDVKTPCSEKDEKKYGIPTLEEFGLDSTSLGEELFPGGGEQALRR  
LDEHMKKTGWVCSFEKPQTSPNSLSPSTTVLSPYVTFGCLSAFTFWWRLTEVYRGKKHSDPPVSLHGQLLWRE  
FFYTCSLGIPIPNFNKMKGNTVCTQVDWDTNQDYLAAWREARTGFPFIDAIMTQLRQEGWIHHLARHAVACFLTR  
GDLWISWEEGQKVFEELLLDGDWALNAGNWQWLSASAFFHQFFRVYSPIAFGKKTDKNGDYIKKYLPLLEKFP  
PQYIYEPWKAPRSVQQAAGCIVGKDYPHPIVQHEQVSKKNIQRMKEAYARRSTASSESPIKKQGEKRKSLSVV  
DMLQKKARKE

>Cyprinodon\_vari\_\_XP\_015239296.1

MVVNSVHWFRKGLRLHDNPALQEALSGADTVRCVYVLDPWFAAGANVGINRWRFLLESLEDLDNSLKKLNLSRL  
FVVRGQPTVEVFPRLFKENNVTRLTFEYDPEPYGKERDAAI IKMAQEFQVEAVVRNSHTLYNLDR IEMNNNNP  
PLTFKRQFQTIVSRLELPRRPLAPISQQQMNRCLSNISDNHDQLYSIPSLVELGFRTEGLPTAVWRGGESEALD  
RLSRYLDKNVNLGREQEPHISLKSTLMGTFLXSPPLLSHVIVSCPVAVRYS DALKQDQTDLLLCQLCKRSSPP  
LSLYGQLLWREFFYTATNPNPNFDRMEGNPICVQIPWDQNPEALAKWAEGRTGFPWIDAIMTQLRQEGWIHHR  
ARHAVACFLTRGDLWISWESGMKVFEELLLDADWSVNAGSWMWLS C S S F F Q Q F F H C Y C P V G F G K R T D P S G D Y I  
RRYVPILKDYPNRYIYEPWNAPEALQKAVNCVVGVDY PKP MINHAEGSRLNIERMKQVYQQLSHYRGLSLLAS  
VPTIQEEAEPPMTDESQTSSGPDSPRLDLVEVEAAGCSTVPDSSTSIPHS DQEDTSHHHLFLDHCTSSGQPPS  
PTSSPTRGATSRHKPGSPSCSCLSPSTSPSSDPLSQRQRCQSCPVEEERMQEEVDEEEKMEEEAAPQQ

>Cyprinodon\_vari\_\_XP\_015239459.1

MIVMSYRSPWENRGTERVAGDQAVVRQMLREVLVGREDPECFFAMCLSVLGNQETRSEFLSI IKPLSTANIRL  
HSVLRSLYQDYFTKTEDDELEIALALSLEMKENQMSAPNQLVLQAGNDQSSLPSSKPTSQEKSFQKQEDVP  
GREKSEFTEQSRSKTKETFLDIENDKSLSFKSGDNQSLGSSQPPYIPGSSASFTIPTTASKSDQMIRGDGNVS  
EKPKRPKSRQRRAAAQQVVG LIRSPSAPPPVLLWFRDLRLCDNPALIGSLEVGA PVIPIFIWSP EEEEEGP  
GVTVAMGGACKYWLHQALSCFRASLEQIGSHLVFFKASNDVTEVGSSSLNTLKT LVKETGAQSVMANALYEPWL  
KERDDAVSSALQKEGVEFKMFHSYCLRD PFSVSTEGVGLRGIGSVSHFMSCCRQNP GAAGVPLDPPVSLPSP  
AHWPQGVPLDALGLARMPRRKDG TIVDWAANIRKSWDFSEDGAHARLEAFLHDGVYRYEKESGRADAPNTSSL  
SPYLHFGQLSPRWLLWDAKGARCRPPKFQRKLAWRDLAYWQLTLFPDLPWESLRPPYKALRWNTDRSHLKAWQ  
KGNTGYPLVDAAMRQLWLTGWMNNYMRHVVASFLIAYLHLPWQEGYRWFQDTLVDADVAIDAMMWQNGGMCGL  
DHWNFVMHPVDAAMTCDPYGSYVRKWCPELSDLPDEL I HKPWKCPASMLRRAGVVF GQTYPERIVIDLEERT  
KSLQDVALVRKQFQYV D K R S G C D L V P L P K R L V S E A L G L S H R D G A V V T E G K Q F L L P V I T R M E F K H Q L E D P D A D  
AASNPNYAVLKGYSRKRDETI AFLNERDFTASVMYEGAQRERLERDHRRL E GLPPP PSARGKARTPTAKD  
RFSVVPGGAIVSKN

>Danaus\_ple\_ple\_OWR51555.1\_KGM\_210113

MQHTVYDFNSVVKNNNGSIPLTYQKFLSLVSDVQVKDIIQISKGVSDECKASDYDSQGYDIPSL EEFQVNESE  
LSECKYPGGESEGLKRLDVYMAKKQWVCNFEKPKSSPNSIEPSTTVLSPYISHGCLSAKLFYHKLKQVENGSK  
HTLPPVSLMGQLMWREFYYTAGSGTENFDKMVGNSVCTQIPWKKNDAHLKAWAEGKTGYPFVDAIMRQLKQEG  
WIHHLARHMAVACFLTRGDLWISWEEGAKVFEDFLDYDWSLNAGNWMWLSASAFFYKYRVYS P V A F G K K T D K  
DGLYIRKYVPELKKYPSEFIYEPWKAPKGVQKTAGCVIGEGYPNRIVDHDKVHKDNIQKMNSAYKVNKEKKAM  
KRPRQ

>Danaus\_ple\_ple\_XP\_032522602.1\_cry-1

MLGGNVIWFRHGLRLHDNP SLHSALEDASSPFFPIFIFDGETAGTKMVGYNRMRYLLEALNDLDQQFRKYGGK  
LLMIKGRPDLIFRRLWEEF G I R T L C F E Q D C E P I W R P R D A S V R A L C R D I G V S C R E H V A H T L W N P D T V I K A N G G I  
PPLTYQMFLHTVEIIGNPPRPVDDVDLNGVNFGLPESFYREFVVDKAPKPEDLGVFLENEDIRMIRWVGGE  
TAALKQMQUERLAVEYETFCRGSYLP THGNPDLLGPPISLSPALRFGCLSVRRFYWSLQDLFQQVHQGRLASTQ  
FITGQLIWREYFYTMVSNPNY AQMSGNPICLDIPWKEPENDELQRWKEGRTGFPFVDAAMRQLRTEGWLHHV  
VRNTVASFLTRGTLWLSWEHGLQHFLKYLLDADWSVCAGNWMWVSSSAFEALLDSGECACPVRLGRRLEPTGH  
YVRRYVPELARMPEYIYEPWRAPLEVQEAAGCVIGRDYPAPVVDHTAAAARNRANMQELRRLLEKAPPHCCP  
SSEDEV R Q F M W L G D D S Q P E L T T T

>Danaus\_ple\_ple\_XP\_032529216.1\_photolyase

MKIKFLTHFTTKMASSAKKPKLLLP IKNESSTINVD DFMKQIHKKREETAKSILDFNFNKSRLRIISQEQMVS  
DDCEGIVYWMRSRVQDNWAFLYAQELALKNKVPLHVCFLIAKYLDASVRQFHFLIKGLEKVAADCDKLN I  
SFHLLEGNGAEVLPQWVIDHRIGAVVCDNFNPLRVPLGWVEGAKKKLKKDVPLIQVDAHNVPVPCWVASNKQEYS  
ARTIRNKINSKLDEYLTEFPPIKHPHSSSFKEPIDWDKAIETREADKSVGPIGWAGPGYDNAVKTLKSFLD  
KRLKVFATKRNDPTQDALSNLSPWFHFGQISAQRVALCVKEYKTKYTESVNSYLEEAIVRRELADNFCFYCEH  
YDSIKGASQWAQKTLDDHRNDKRTHIYTL EQFCKAETHDDLWNSAQIQMVKEGKMHGFLRMWCKKILEWTSS  
PEEALKYAIYLN DHYSVDGRDPSGYVGC MWSICGVHDQGWAERAVFGKIRFMNYDGCKRKFNVPAFVCRYGGK  
VHKYNNLTDKQKKK

>Danaus\_ple\_XP\_032511499.1\_cry-1-like

MSVAETLPLRARSPTAQKSSQPAGVPKEKHTVHWFRKGLRLHDNPALREGLVDATTFRCVFIIDPWFASSSNV  
GINKWRFLQCLELDKNLRKLNLSRLFVVRGQPADALPKLFREWGTALTTFEEDPEPYGRVRDHNIMTKCREV  
GIQVTSRVSHSTLYKLDDIIEKNGGKAPLTYHQFQALIASMPPPPSAEPTISLETNRAVTPISDNHDERFGVP  
TLEELGFDTEGLKPPIWIGGENEALLRLERHLERKAWVASFGRPKMTPESLLSSQTGLSPYLRFGCLSTRLFY  
YQLSELYKRIKQERPPSLHGQILWREFFYCAATRNPNFDRMEGNPICVQIPWEKNQEALKKWANGQTGFPI  
DAIMIQLRNDGWIHHLARHAVACFLTRGDLWISWEEGMKVFEDELLDADWSVNAGMWMWLSCSSFFQQFFHCY  
CPVRFGRKTDPNPDFIRKYIPVLKNMPTRYIHEPWVCPEEIQKSIRCIIGKDYPMPIVIDHTKASEINLERIKQ  
VYAQLAKFKPQGALIPQMLQRPVNLQSSPSPTSIIANINQSNYLCSSQSSDVPTPTNQTNTQFKEDAVFLKPTV  
NNIKSNVDKQQQFKQVVIVQEDKHSENQRHSVGNKYIVNEINKNINDIPVKQNNYDFKALTNLNKFSSNEPLT  
FLNQTPNKNESFGQDVNNVIDVYSTSKPKFYFTDNGVITHNENAQTFRKDSYSDNYNKESTGSNRVGEVHSNN  
PQTDKISSEKK

>Danio\_rerio\_BAA96850.1\_cryptochro

MVVNSVHWFRKGLRLHDNPALQEALNGADTVRCVYIILDPWFAGSANVGVNWRWFLLESLEDLDTSLRKLNSRL  
SVVRGQPTDVFPRLFKEWNVTRLTTFEYDSEPYGKERDAAIIKMAQEYGVETVVRNSHTLYNPDRIIEMNNHSP  
PLTFKRFQAIVNRLELPRKPLPTITQEOMARCRTQISDNHDEHYGVPSLEELGFRTQGDLSHVWKGGETEAL  
RLNKHLDRAKAWVANFERPRISGQSLFPSPTGLSPYLRFGCLSCRVFYNNLRDLFMKLRRRSSPPLSLFGQLLW  
REFFYTAGTNNPNFDMEGNPICVQIPWDHNPEALAKWAEGRGTGFPIWIDAIMTQLRQEGWIHHLARHAVACFL  
TRGDLWISWESGMKVFEELLLDADWSVNAGSWMWLSCSAFFQQFFHCYCPVGFGRRTDPSGDYIRRYIPKLKD  
YPNRYIYEPWNAPEVQKAANCIVGVDPKPMINHAESSRLNIERMKQVYQQLSHYRGLSLLASVPTIQEEAE  
PPMSDDSQASSSSTGQASSPPHLSITAPSTPPLSESSSPNSSPTASTSVPHQTKRVRPSETPSKQKTKVKHT  
SQARGLELKMDDKQ

>Danio\_rerio\_NP\_991249.1

MSASRTVICLLRNDRLHDNEVFHWAQRNAEHIIPLYCFDPRHYQGTYHYNFPKTGPFRLRFLDLSVKDLRAL  
LKKHGSTLLVRQGPEDVVCCELKQLGVSSTVAFHEEVASEEKSVEEKLKEICCCQNKVRVQTFWGSTLYHRDD  
LPFSHIGGLPDVYTQFRKAVEAQGRVRPVLSTPEQVKSPPSGLEEGPIPTFDSLQTEPLDDCRSAFFPCRGG  
TEALARLKHFWDTNAVATYKETRNGMIGVDFTSKFSPWLALGCISPRYIYEQIKKYEVERTANQSTYWVIFE  
LLWRDYFKFVALKYGNRIFYMNGLDKHVPWKTDMKMFDAWKEGRTGVPFVDANMRELALTGFMSNRGRQNV  
SFLTKDLGLDWRGAWEFYLVDHVCNSYGNWLYSAGIGNDPRENRKFNMIKQGLDYDNGDYVRQWVPEL  
RGIKGGDVHTPWTLNSALSHAQVSLNQTYPCPIITAPEWSRHVNNKSSGSPSSSKGRKGSSYARQHKDRGID  
FYFSKNKHF

>Danio\_rerio\_NP\_001070765.2\_cryptochro

MVVNTVHWFRKGLRLHDNPILRDSILGAHSVRCVYIILDPWFAGSSNVGISRWFRLLQCLELDASLRKLNSRL  
FVIRGQPTDVFPRLFKEWNNINRLSYEYDSEPFQKERDAAIKKLANEAGVEVIVRISHTLYDLDKIIELNGGQS  
PLTYKRFQTLISMEAVETPAETITAEMVGPCTTPLSDDHDEKFGVPSLEELGFDTEGLSSAVWPGGETEALT  
RLERHLERKAWVANFERPRMNANSLASPTGLSPYLRFGCLSCRLFYFKLTDLYRKVKKNSSPPLSLYGQLLW  
REFFYTAATNNPRFDKMEGNPICVQIPWDKNPEALAKWAEGRGTGFPIWIDAIMTQLRQEGWIHHLARHAVACFL  
TRGDLWISWEEGMKVFEELLLDADWSVNAGSWMWLSCSSFFQQFFHCYCPVSFGRRTDPNGDYIRRYLPVLRG  
FPAKYIYDPWNAPEVQKAAKCIIGVHYPMMPMVHHAESRLNIERMKQIYQQLSCYRGLGLLAMVPSNPNNG  
ENSTSLMGFKTGDMTKEVTTPSGYQMPPTSQGEWHGRTMVYSQGDQQTSSIMTSQGFNGNGSTM CYRQDAQQI  
TGRGLHSSIIQTSGKRHSEESGPTTVSKVQRQCSS

>Danio\_rerio\_XP\_005168334.1

MLPEAIWSPSEVFSSWRKSVAMSHRTIHLFRKGLRLHDNPILLGALASSSALYPVYVLDREVFLQGAMHMGALR  
WRFLQSLLEDLTRLQAIGSRLFVLCGSTANILRELVAQWGITQISYDTEVEPYTRMDKDIQTVAQENGLQT  
YTCVSHSTLYDVKRIVKANGGSPPLTYKKFLHVLVLGEPEKPARDVSIEDFQRCVTPVDVDRVYAVPSLADLG  
LQVEAEVLWPGGESHALQRLKHFQSQGWVANFSKPRTPINSLLPSTTGLSPYLSLGLSVRTFYHRLNSIYA  
QSKNHSLLPPVSLQGQVLWREFFYTVASATPNFTKMEGNSICLQIDWYHDPERLEKWRTAQTFPIWIDAIMTQL  
RQEGWIHHLARHAVACFLTRGDLWISWEEGMKVFEELLDADYSVNAGNWMWLASAFFHKEYTRIFCPVRFGR  
RTDPQGEYLRKYLPLVKNFSPQYIYEPWKAPEVDVQLSAGCIIGKDYPRIVSHIEASQRNLALMRQVRTEQQT  
TAELTRDVADDPMEAGLKRELEEEGLLEEAESQCTSKRFSGSSDHKSRPCSWTPETLQLELSGEVM

>Danio\_rer\_NP\_957358.1\_CPD\_photol

MSANKNNLKRQMKSTISAGGKQPKLTGEKGKESGWLLKEVAELRRAAQGCFFNKKRLRYLSDTQKVKQSSQGV  
LYWMSRDQRIQDNWALIYSQQLALAEKLPLHICFCLVPKFLDATYRQYAFMLKGLQEVVKECKSLDIEFHLLS  
GEPVHNLPFAFVKSWNIGAVVTDNFNPLRISLQWIDTVKKHLPSDIPFIQVDAHNVVPCWEASTKLEYGARTIRG  
KITKHLQEFLLTDMPLVDTHPYCASRAAKIIDWEEVLSLEVDHNVCVEWAQPGTTGGMFMLESFIDQRLHIF  
ATHRNNPNSDAVSHLSPWIHAGQLSAQRVVMQVKRKNASESVASFIEEIVVRRELADNFCFYNNQYDNISGA  
YDWAKKTLQEHAKDRRQYLYTKKELESAETHDQLWNAQQRQLLEGMHGFRLMYWAKKILEWTASPEEALS  
AIYLNDRSLDGCDPNGYVGCMMWSICGIHDQGWAERPFIHGKIRYMNYAGCKRKFDFVEQFERKYAAIKKNPNLN  
AKISV

>Danio\_rer\_XP\_005155462.1\_cry\_circad

MSHNTIHWFRKGLRLHDNPALIAALKDCRHIYPLFLLDPWFPKNTRIGINRWRFLIEALKDLDSSSLKKLNSRL  
FVVRGSPTEVLPLKLFKQWKITRLTFEVDTEPYSQSRDKEVMKLAKEYGVEVTPKISHTLYNIDRIIDENNGKT  
PMTYIRLQSVVKAMGHPKKPI PAPTNEDMRGVSTPLSDDHEEKFGIPTLEDLGLDTSLSLGPLHFPGGGEQALR  
RLDEHMERTNWVCKFEKPKTSPNSLIPSTTVLSPYVRFGLSARTFWWRLADVIRGKTHSDPPVSLHGQLLWR  
EFFYTTAVGIPNFNKMEGNSACVQVDWNNPEHLAAWREARTGFPFIDAIMTQLRQEGWIHHLARHAVACFLT  
RGDLWISWEEGQKVFEELLLDSDWSLNAGNWQWLSASTFFHQYFRVYSPIAFGKKTDKHGDYIKKYLPVLKKF  
STEYIYEPWKAPRSVQERAGCIVGKDYPRPIVDHEVVHKKNILRMKAAYAKRSPEDKTINKGEKRKASPSIKE  
MFQKKAKR

>Danio\_rer\_XP\_009291670.1\_uncharacte

MSAGEETKPVSEVRELLRELILGREDPQGFFCMCVSLLGDADTRRLFLDLIKPLSSEYEHLHSQLTSVFLEYF  
SKDESEEELELALTLSLYETKQIDPEDKLHNSDHQHHPVRSYKTYADVRTESSGADGSVVPENQPTAKCTLDTE  
VHKTRNAIKHINGDKITKSQKRRLRKKQHLLKNPSGPRPVVLWFRDLRMWDNPALIGCLELGAPVIPVFLWN  
AMEEEGPGVTMSTGGASKYWLHQALVSLKRSLEERGSHLVTLKAEPSSLTALQGLMDETGAASVVATALYEPW  
LKERDDALWETLEKRGVTCHIYHSYCLRDPTYTVSTRGVGLRGIGSVSHFMSCCQQNPAGGLGSPLDAPTTLPS  
PSAWPQGCPLADLGLARMPRRKDGTVIDWAVDIRKTWDFSEEGAHTHLEAFLRDGVYRYEKESCRADAPNTSC  
LSPYLHFGQLSARQVLWAARGARCKSPKFQRKLAWRDLAYWQISLFPDLPWESLRPPYKALRWSSDHAHLKAW  
QRGRGTGYPLVDAAMRQLWQTGWMNNYMRHVVASFLIAYLHFPWQEGYRWFQDTLVDADVAIDAMMWQNGGMCG  
LDHWNFVMHPIDAALTCDPCGTFVRQWCELPKALPDDLIHKPWKCPTSMMLRRAGVVFSDSYPERIVIDLEERR  
AQSLQDVASVRRRFRQFVDQRSQCGLVPVPSRLVQDALGSMEDIVKHEKNGFLLPVITRMEFKHQSEDPDRQD  
NPYSAVLKGYVSRKRDETVAFLNERDFTASVMCESAQRRERLERDSCLEGLPRPTASRGGARTQTRDPYSK  
VPGGVAVPRK

>Daphnia\_mag\_BAS19218.1\_cry

MSSYESAPREKQVVHWFRKGLRLHDNP SLKDGLKGCSTYRCIFILDPWFAGSSNVDINKWRFLLESLEDLDQN  
LPKLNSRLFVIRGQPAGVLPKLFKEWETTCLTFEEDPEPFGRVRDQNMIMCKDFNIEVITRASHTLYHPQKI  
IEKNGGKAPLTYRQFQNI IASVDPPPPPEADITFETIGRGYTPIDDSVDDRFSVPTLEELGFDTDGLMPAVWR  
GGESEALTRLERHLERKAWVASFGRPKMTPQSLLASQTGLSPYLRFGLSVRLFHQQLTNLYKKIKKAQPPLS  
LHGQVLWREFFYCAATNPNFNDKMGVNPICIQIPWDSNAEALAKWANGQTGF PWIDAIMTQLREEGWIIHHLAR  
HAVACFLTRGDLWISWEEGMKVFEELLLDADWSVNAGTWMWLSCSSFFHQFFHCYCPVRFGRKVDPNGDFIKK  
YQPIKLNFPLOYIHEPWNAPESVQRAAKCIIGKDYPLPMVNHLEASQLNIERMKQVYQRLTQYRGTVMSPTA  
KSDNGVIHNVNKNKRENSHAKQYRTEELRQNSTQRNQSNLN

>Daphnia\_mag\_XP\_032780865.1\_cry-2-like

MNKPVVIHWFRKGLRLHDNPALLSALEKVGESHYELRPVFILDPWFVKHARVGPNRWRFLIQSLQDLNNLKK  
IGSRLFVVGKSPLEGFKKLFKEWNVKKLTFEVDIEPYAKIRDEEIKQLAEKHSVTVITKVSHTIYDLEQVFKA  
NGNKAPLTYVKFQSVVAKFGTPAKALDAPGNLPKQCQTLLLSEDYNVPLLEEMRVDLTGLGKELFPGGESEAL  
IRLNKYMNQQEWVCKFSKPDTPNSIEPSTTVLSPYLKFGCLSSRLMYHRIHDVIAGRKHTSPPTSLTGQLLW  
REFYYTCGAYVPNFDMEGNPICKQIPWKKDPEDKHYLAWKDGTGYPFIDAIMTQLRTEGWIIHHLARHAVAC  
FLTRGDLWVSWELGQOVFEELLLDADWSLNAGNWMWLSASAFFHQYFRVYSPIAFGKKTDKHGDYIKKYLPVL  
KKFPSEYIYEPWKAPLSVQKAGCIIIGKDYPKRIVEHEIAVKDNLAKMKEAYQGNKEEGPENEIAKRKKAPSK  
DSSPKITKFLKKK

>Daphnia\_mag\_XP\_032781741.1\_photolyase

MSKPD SAIGSSKTPAAKKLKLETSDDPESSSRTPSVDSGFLASVELKRKQCAGNILEFKFNKKRCRLLSKSM  
LGNFGGGVLYWMSREQRVQDNWALLYAQRALAKMKLPLHVCFCFLVPTFLGATIRQFGFMLKGLEEVEAEQKL  
QIEFHLLKGDSQICVPNLIKKLKLDVAVADFSPLRVPLSWIEKVESIPEDVPFCQVDAHNIVPVWVASDKQE  
IGARTIRKKIHDKLDEFLLTDFPAVVTHPHPSQRKAKPVDWKAANAYLEVDRTEVEEDWITPGTKSGLLELSNF  
CQKRLRLFGEKRNDPNVAALSNLSPWLHFGQLSAQRCILEVKEYKAKYAKSVDVYIETLIRRELSDNFCFYN  
PNYDNLKGAANWAQETLDVHKKDKRPALLTSQQLEEGKTHDDLWNASQIQLTRTGKMHGFLRMYWAKKILEWT  
ETPEEALRLAIYLNDRYSLDGRDPSGYVGCWWSICGIHDMGWKQRDVFVGKIRYMNYKGCQRKFDVVAFVQRF  
ARTYPIKGVKYE

>Daphnia\_mag\_XP\_032785219.1\_cry\_DASH-1

MLKIVNMTNRVAVCLFRNDLRYDNEVLAHAHKNNTDYILPLYCFDPRHFAGTHHYGFPKTGSFRTRFLLESVE  
DLRKKLLKHGNSLMIVHGKPEDVVS KIVKNLVGFKLTLLLHAEVTKEETDVEKSLQKVCQENKASFVNIWGST  
LYHKGDLPFQISKVPDAYTAFRKDVEDQLKIRPEISMPEKLKPVPSFPSEISWGNLPSYEMLSNSEPLLNPS  
AFPFGGETAALQRLKSYLWDTNVAQYKETRNLIGSDYSTKFSPLALGCLSAKIHWELEKEYEQQRTKNQ  
STYWVRFELLWRDYFKFVSMKYGDRIFYPNGMKGRQEWKKNMELFKAWQAGKTGVPFVDANMRELLETGWMS  
NRGRQNVASFLVKDLHLDRLGAEFESLLLDHVC SNYGNWNYVAGIGNDPRENKRKFNMIKQSMDDYDLEGNF  
IRMWVPELREIPGSKIHSPWMLSSGALSAANVRLGQNYPNPVVVAPEWSRHQREGKESGHGGRGHGIPKAGNQ  
RGIDIFYFKNPGTKK

>Daphnia\_mag\_XP\_032790260.1\_cry-1-like

MNIIWFRRLGLRLHDNPALLSAIENSKEFLALYIFDITTFQDAGYKPYHMYGFLLECLNDLNESFQSVGTKLHIF  
QGCPLFVFRHLRQSHCINKLCFIQDCEPIWHERDNAVKNLCELDIEVYEHVAHTLWDPMDI IASNGGTPPLT

YEMFVHVAMSVGDPPKPAADPEWKGVKFVSIIEPFETNRFTLFDGVPTLGA VGVPENPVGCRNRKIIGGETNAL  
KHFEIRLRAEETAFRSGFYQPNQARPDLLGPPLSLSAAISVGAMSVRLFYWKIHELFDKVNKGSPPAWLGITG  
QIIWRDYFYAMSRMNPKEFDKEVDNPICLQIPWNEEELFEKWNGQTGYPFIDAGMRQLNQEGWMHHSVRNAV  
AMFLTRGDLWLNWDIGAEYMANQLVDSDSVNSGNWMWVSSSAFERLLDCSVCINSVLYGKRLEPSGDYIRRY  
VPELANFEFEYIHEPWKAPIDIQRAANCIIGKDYPTRIVIHEEVLTRNQTMKDFRRKFKETPAHCQPSSNSE  
VYKFFCLPDDSLPF

>Daphnia\_pul\_EFX71237.1\_DNA\_photol

MSKPSSSKGASKPPATKKPKLESSDDESSASLVTDSSGFLANIHLKRKKCADNILEFKFNKKRCRLLSKSME  
LGDCGGGILYWMSREQRVQDNWALLYAQRALAKMKLPLHICFCLVPTFLGATIRQFGFMLKGLEEVETECQKL  
KIEFHLLKGESQICVPDLITKLKLDVAVADFSLRVPLSWIDKVESIPKNVPFCQIDAHNIVPVWVASDKQE  
VGARTIRKKINDKLDEFLEFPVIVHHPAKTKAKSVDWKAADAYLEVDRVTGGEVDWITPGTKSGLQELFNF  
CQRRLLKMYAEKRNDPNLAALSNLSPWLHFGQISAQRCILEVKGYKTKHAKSVDAYMEETIIRRELSDNFCFY  
TNYDNLKGANWAQETLEVHKKDKRPALLSAQQLEEGKTHDDLWNASQIQLTRTGKMHGFLRMYWAKKILEWT  
ETPEEALRIAIYLNDRYSLDGRDPSGYVGCMMWSICGIHDMGWKQRDVF GKIRYMNYKGCQRKFDVVA FVHRFG  
ARAYPIKGVKYD

>Daphnia\_pul\_EFX77441.1\_CRY-D

MNVLWFRRLRIHDNPALLSALENSKDFIALFVFDTTFQDPGYKPYHMGFLLECLHDLNESLESVGTKLHVF  
QGCPLLEVFRHLHNIKPINLCLFIQDCEPIFHERDIAAKNLCSIEDIEVYEHVAHTLWDPMDI IASNGGTPLT  
YEMFVHVAMSVGDPPKPVADPEWKGVKFLTLEPFESNRFTLFGGVPTLSQIGVPENPVGCRGRRIFGGETNAL  
KHFAIRLQAEETAFRSGFYQPNQARPDLLGPPLSLSAAISVGAI SVRLFYWRIHEIFDKVNRGNPPAWLGITG  
QIIWRDYFYAMSRMNPKEFDKEVDNPICLQIPWNEEELFEKWNGQTGYPFIDAGMRQLNQEGWMHHSVRNAV  
AMFLTRGDLWLNWDIGAEYMANQLVDSDSVNSGNWMWVSSSAFERLLDCSVCINSVLYGKRLEPSGDYIRRY  
VPELANFEFEYIHEPWKAPIDIQRTANCIIGQDYPAQMVVHEEVLPRNLEWMKEFRQKFKETPAHCQPSSNSE  
VYKFFCLPDDSLPF

>Daphnia\_pul\_EFX82092.1\_CRY-M

MSGYDSEPREKQVVHWRKGLRLHDNP SLKDGLKGCSTYRCIFILDPWFAGSSNVDINKWRFLLESLEDLDQN  
LRKLNSRLFVIRGQ PAGVL PKLFKEWETTCLTFEEDPEPFGRVRDQNIITMCKDFNIEVITRASHTLYHPQKI  
IEKNGGKAPLTYRQFQNI IASVDAPPPESDITFESIGRGYTPMDESMDDRFSVPTLEELGFDTDGLMPAVWH  
GGETEALTRLERHLERKAWVASFGRPKMTPQSLLASQTGLSPYLRFGCLSVRLFHQQLTNLYKKIKKAQPPLS  
LHGQVLWREFFYCAATNPNFNDKMIGNPICVQIPWDSNAEALAKWANGQTGF PWIDAIMTQLREEGWIIHLLAR  
HAVACFLTRGDLWISWEEGMKVFEELLLDADWSVNAGTMMWLS CSSFFHQFFHCYCPVRFGRKVPNGDFIKK  
YQFVLKNFPLOYIHEPWNA PESVQRAAKCVIGKDYPLPMVNHLEVSQ LNIERMKQVYQRLTQYRG TG LMSHSP  
QSDHGII INVGNKNKNENSHAKQFRTDEL RQNAVQRNQSNLN

>Daphnia\_pul\_EFX85418.1\_DNA\_photol

MNNKPVVIHWRKGLRLHDNPALLNALEKVGESHYELRPVFILDPWFVKNKVGPNRWRFLVQSLQDLDDNLK  
KIGSRLFILKGSPTETFKKVFEKWNVKKLTFEVDIEPYAKTRDEEIKKLADHHSVTVAKVSHTIYDLEKVFK  
ANGNKAPLTYVKFQSVVAKFGTPEKALNAPGKLPKQCQTLLSDKYNVPLEEMQVDLTGLGKELYRGGETEA  
LARMEKYMSQQDWVCKFSKPDTS PNSSIEPSTTVLSPYLKFGCLSPRLMYHRLHEIIDGRKHTSPPTS LTGQML  
WREFYYTCGAYTPNFNRMVGNPVCKQIPWKVDPEDEHFVAWKNGRTGYPFIDAIMIQLRTEGWIIHLLARHAVA  
CFLTRGDLWVSWELGQQVFEELLLDADWALNAGNMMWLSASAFFHSYFRVYSPVAFGKKTDKHGDIYIKKYL PV  
LKKFPT EYIYEPWKAPLSVQQTAGCIIGKDYPKRIVDHDVVMKENLAKMKKAYQ GKEEAPEGE PVKRKKSASN  
ESPPKITKFFKKN

>Daphnia\_pul\_EFX86680.1\_hypothetic

MIRILKMSNRVAICLFRNDLRYHDNEVIALAHKSADFLVLPYCFDPRHFEGTHHYKFPKTGIFRTQFLLESVE  
DFRQTLVKRGSNLMIVHSKPEEALLKIFKSLTGLKVTLILQTEVTKEETDVEKRLQKICQEIKASYINCWGST  
LYHKGDLFPQINHVPDSYTGFRKDVEEKLRIRPEISMPDKMKPVPTFAHEIPWGNLPTIEALNSTKPIPNSSS  
AFPFNGGETAALLRLKSYLWDTNAVAQYKETRNGLIGSDYSTKFSSWLSHGCLSPRIHWELEKYELQRTKNQ  
STYWVRFELLWRDYKFFVSMKYGDRIFY PNGMKGRRQQWKDMELFKAWQMGKTGVPFVDANMRELLATGWMS  
NRGRQNVASFLVKDLLLLDWRLGAEFESL LLDH DVC SNYGNWNYVAGIGNDPRENRFNM IKQSM DYDLEGN Y  
IRMWVPELREIPGSKIHS PWMLSSGALSAKIRLGDNYPNPVVVAPEWSRHQKGKDFGQGNPKGGTQRGIDF  
YFKNPGGQK

>Darwinula\_ste\_CAD7244622.1\_unnamed\_pr

MEDFERVNHRQRTSGVIALHWRHGLRLHDNPALS YAAANAKKLYVMFTFDGESAGTKLIGYNRMKFLLLES LH  
DLNCQLHSYGGQLLVFREKPLKVITRLHDVLGVNLVTTFEQDCEPIWNERDEAVKEGCRELGIECREEVSHTLW  
DPKEVVDMNGGVPLTYTMTFLQVTS AIGEPPHPEERLDFSSVKFGIVPVGLAAELNLFAEIPTPEDLNVKCSH  
PADIEENSGSWIGGETQALLLFDMLAVEADAFKRNFYLPNQARPDLLGPSRSLSPYLRYGCLSIKMYWGIH  
DLFAEIHKGKPPCHVHLTAQLIWRDFFYAMSVGNPNYDRVKENPICLQIPWRHKQKELQQWKDGKTGF PFVDA  
VMRQLLREGWIIHVARNAVAQFLTRGGLWISWEDGLKVFLKHLLDADWSVC SGNWLWISSSAFETILDCSHCL  
SPVAYGRRLEPTGDYIR

>Darwinula\_ste\_CAD7250301.1\_unnamed\_pr

MNEGWVMTNRQASDTATSSVRHRS AKHSSRPKHSVHWFRRLHLDNPSLRAGLENCITWRCIFILDPWFAGS  
SNLGLNKWRFL LQCLEDLDQSLRK LNSRLFVIRGQPADVLPKYLKEWGTTC LMEEDPEPFGRVRDH NINVL C  
REMG IQVKS KVSHTLYKLEK IIEKNGGVAPLTYGQFQAVLSHMDPPPAPVPTITTTQTIGNAYTPI SDDHDEQF  
AVPTLEELGFDTESLKPTLWPGGEMEALARLERHLERKAWVASFGRPKMTPQSLLASQTGLSPYLRFGCLSPR  
LFHQQLSELYRKIRRCPPPLSLHGQLLWREFFYTAATNNPSFDMQGNPICVQIPWDKNPEALAKWANGQTGY  
PWIDAIMVQLREEGWIIHHLARHAVACFLTRGDLWISWEEGMKVFEELLLDADWAVNAGNWLWLSCSSFFQQFF  
HSYCPVRFGRKADPNGDYIRRYLPVLKNFPTAYIHEPWTAPEAVQKA AKCRIGQDYPLPMINHL DASRINMER  
MKLVYQKLHNYRGGSVSPSSFH IPMKRVKLELEPWNGQALTT

>Darwinula\_steve\_CAD7245491.1\_unnamed\_pr

AGKSVESFPFIKKRVRI LSGATEVKENSSGIVYWMSRDQRIQGLEEVSS ECTLG MNFHL LRGEAKSSLVKFV  
KDYDIGAVVTDFAPLRVPLGWVEDVKKNLPNDVSLCQVDAHNIVPCWVASEKLEYGARTIRPKIH NKLSEFLT  
EFFPPVINHPYPPKIAEAIDWDEVQKFLEVD RSV EEVQWATPGTRAGMQMLHEFIQKRLKLFGEKRN DPTVDA  
LSNLSPWFHFGQVS VQRCILEVKKQ GKSNKSVEAFVEEAVVRRELADNFCFNNPNYDSIKGAYDWAR KTLND  
HKDDKRSYLYTRKELEEAKTHDDLWNAAQIQMVSEGMHGF LRMYWAKKILEWTASPEEALTIAIYLN DKYEL  
DGRDPNGYVGCMWSICGIHDQGWAE RPFVFGKIRFMNYQGCKRKFDVDSFVRKYKARAFSKK

>Dasypus\_nove\_XP\_004473360.1

MGVNAVHWF RKGLRLH DNPALKECIQGADTIRCVYI LDPWFAGSSNVGINRWRFL LQCLEDLDANLRK LNSRL  
FVIRGQPADVF PRLFK EWNITKLSIEYDSEPF GKERDAAIKKLATEAGVEVIVRISHTLYDL DK IELNGGQP  
PLTYKRQFQTLISKMEPLEIPVETITPEMIEKCTTPLSDDHDEKYGVPSLEELGFDTDGLPSAVWP GGETEALT  
RLERHLERKAWVANFERPRMNANSLLASPTGLSPYLRFGCLSCRLFYFKLTDLYKKVKKNSSPPLSLYGQLLW  
REFFYTAATNNPRFDMEGNPICVQIPWDKNPEALAKWAEGR TGFPWIDAIMTQLRQEGWIIHHLARHAVACFL  
TRGDLWISWEEGMKVFEELLLDADWSINAGSMMWLSCSSFFQQFFHCYCPVGFGRRTPNGDYIRRYLPVLRG  
FPAKYIYDPWNAPEGIQKVAKCLIGVNYPKPMVNHA EASRLNIERMKQIYQQLSRYRGLLLASVPSNPNGNG  
GLMGYAPGENILGCSSSGSCAQGSSILHYAHGD NQQTHLLKQGRSSMGTVLSSGKRPSQEEETQSIGPKVQRQ  
STN

>Dasypus\_nove\_XP\_012380336.1

MRRPRMNANSLLASPTGLSPYLRFGCLSCRLFYRLWDLYRKVKRNSTPPLSLFGQLLWREFFYTAATNNPRF  
DRMEGNPICIQIPWDRNPEALAKWAEGKTGF PWIDAIMTQLRQEGWIIHHLARHAVACFLTRGDLWVSWESGVR  
VFDELLLDADFSVNAGSMMWLSCSAFFQQFFHCYCPVGFGRRTPSGDYIRRYLPKLKGFPSRYIYEPWNAPE  
SIQKAACCIIGLWNGKGWNGPTGMVQTSPLIVPVGWHSDYSPASLPGLLASVPSCVEDLSNPVAEHSSSQPG  
SMSSTGPRPLPSGPASPKR KLEAAEPPGEELSKRARVAELPSKDA

>Dendrobium\_cat\_blue-lighta\_XP\_028552950.1

METDPSPLQPQTPDSSEEQQKEITSSPSKSSPPIASLSLSLSTNLLSKPTPPVATAQPFAALPSRLKIPTQI  
FSLTRLSFSASSVSTPARPSNLSSSTPALLSSPSPFLRRRPADPSGGAAARRCTLLWFRCDLRTHDNEALTA  
SNESLSILPVYLFDP RDY GKSSSGFDKTGPYRATFLLQSVADLRSLRARGSDLVVRIGRPESVLVELARLVG  
ADAVYMHREVSHEEARTEERVEKAMESEGVEVKYFWGSTLYHIDDLPFEELEQMP SNYGGFREKVQGLNVRKTI  
EALDQIKGLPSRGDVEPGEIPTLMDLGLNPAPAVTQDGKPAVSASLAGGETEALERLRKFAVECCAQPNKGFR  
NGAQDSIYGANFCKISPWLAMGCLSPRFMYEELKRTANRAISSKTQKNVDASGGSGMNWLMFELLWRDFFRF  
ITKKYSTKRKVGAEPVTACTVQSSFSTR

>Dendrobium\_cat\_XP\_020678783.1\_cry-1

MMDSQSRTIVWFRRLRIEDNPALLSAARDGVTLVPVFIWCPSEEGKFYPGRCSRWWLKQSLAHL DQSLKSIGA  
PLVFIRAESTVSALLHCVNAIGATRVVYNHLYDPVSLVRDHAVKSQLVDHGIVVQSYNGDLLFEPWEVYDASG  
HAFTTFNEFWNRCLSLPTEPA AFLPPWQLVPSPGIESLDSCSIEELGLEKESEKPSNALLGRGWS PGWSNADK  
VLSVFVGENLLNYSKNRMKLEGT TTSLLSPYLHFG EISVRKIFQNVMRQIQWTKENS DAVESVDFFLR SIGL  
REYSRYLCFNFPFTHEMSLLGNLKHYPWRADQEQFKSWRQGR TGYP LVDAGMRELWATGWMHNRTRVIVASFF  
VKFLQLPWTWGMKYFWD TLLDADLES DILGWQYISGSLPDGHELIRLDSPEVQGRKFD PDGAYIRSWIPELAR  
MPTEWIIHHPWDAPTSILKAAGVDLGSNYPKPIVDINIAREHLDDALSTMWELDRAAKAERFNGAGEVVDNVK  
MQTFDIPTVVVRREASDITSSLDQRVPSFHNMDTNFNKKRSINLDYVMKKEVEFRNNEKGT VGEEDDLRSTAE  
SSSAKRSISEAQFSVPLPCYSESESKNQCGYDAFKPQFFRGSPSTQPVQKDNAM E AQYEEADVESCKEGLRS  
CKRPA

>Dendrobium\_cat\_XP\_020678980.2\_photolyase

MAAAGAVHPGRVRL LNPIKTPPPSPGSPAGPVVYWMFRDQSRSDNWALIHAIHLANHSSAPIAVAFNLFHRE  
LNAHARQLGFMLRSLILLRLRLHELGI PFFLFRGDAVD T I PKFLCECGASALVTDFSPLRSVREWKAEICERV  
GERVRVYEVDAHNVVPVWVASNKLEYSAKTIRAKIQRVLP EYLV EFP EISKPDLEWGLED PKEIDWEELVAEV  
LREGGEVPEIEWCEPGEDAAMEALMGAKEGFLTRRLKNYSTDRNNPLKPRALSGLSPYLHFGQISAQRCALEA  
RKLNKNSHPQAVETFLEELIVRRELADNFCYYQPHYDSFLGAWDWARRTLMDHAADKREHLYTRDELEKAKTAD  
LLWNASQLEMVHHGKMHGFM RMYWAKKILEWTS GP EEALAIALYLN DKYEIDGRDP SGYVGCMWSICGVHDQG  
WKERAVFGKIRYMNYAGCKRKFDVDGYIAHVKSLVRSNKRKAENAKSPMPKISRT

>Dendrobium\_cat\_XP\_020685617.1\_(6-4)DNA\_p

MESSSSSNLCMIWFRKGLRIHDNPALELAQKGSKHLFPVFVLDPPYIIDPDSLASSPGSSRAGINRIQFLLESILV  
DLDCGLRRLESRLVLKGEFVQVIARLLKDNWIGKLLFFEFDTPEYQAQTRDNKVKDIASASGIEVFSPVSHTLF  
DPAEVIRKNGGKAPLTYKSFVAIAGKPSAPLRSMYSKLPPIGDIAGYEILGVPSIHDLGYKDVKEFSPFRGG  
ETEALKRLKENLVNKKWVAEFKPKGDPSEFIKPAITVLSPYLKFGCLSSRYFFQCVD DAYKTVKKHTQPPVS  
LAGQLLWRDFFYTAVFGTPNFDRMQGNKICKQIPWRDDEKLFVAWRDAQTGYPWIDAIMIQLKKGWMMHLLAR  
HSVACFLTRGDLFIHWEKGRDVFERLLIDSDWAINNGNWLWLSCSSFFYQYHRIYSPISFGKKYDPSGNFIRH  
FLPVLKDMPEYIYEPWTAPLSIQRQANCIIGRDYKPKVPHDLASKECKRQIGAAAYALNLSGETADAEKLN  
SLRRKLEEDDYDGIQNMKQKKRMSK

>Dendrobium\_cat\_XP\_020695999.1\_cry-1\_isof

MPPASSTNGGNTSNNNISIVWFRDLRVEDNPALAAAGVRAGYVVSFVIWAPEEEGHYFPGRVSRWWLSQSLKH  
LDSSRLSLGSNLITKRSFDTASTLV DVVNSTGATNLFNHLVDPLSLVRDHRIKELLSSRGLTVRSFNADLLY  
EPWEVADENGCPSTFEPFWNKCLNMPYDPAAPLLPKRIISGDVSRCPSDTLVFEDESERGSNALLARAWSP  
GWRNANKALNAFINGPLIDYSVNRKADGATTSLLSPHLHFGELSVRKVFHLVQIKLLVWINEENESGKESVN  
LFLKSIGLREYSRYLSFNHPFSHERPLLSHLKFFPWVDENYFKAWRQGRGTGYPLVDAGMRELWATGWLHDRI  
RVVVSFFVKVLQLPWRWGMKYFWDTLDDADLECDALGWQYISGTLPDGREFDRIDNPQFEGYKFDPNGEYVR  
RWLPELIRLPTEWIHHPWDAPEPVLQAAGIELGSNYPLPIVEISAAKERIQEALIEMWQIETASRTAMENETE  
EGLGDSSDLPPFYYPQEIDMEADPEPTRANNLQTTTRYIDQMVPSITSSFVRNDEDAISVDISSTREDGRAE  
VPTNVNFDDQTHGATDQDGAAVVRNNAVLEFNPARLQNRLEFSESSSSSYTERDGGLPVWSPSNLSEHFISE  
ETSVRTSAYLQRHPQSHQMMNWRQISPLRSWEVESTLHPNAIG

>Dendrobium\_cat\_XP\_028549270.1

MRSLSLFPQHSVASTLCSPKTAGIMCSASSSYSATSSAVRLAAVHPVPSLTADEISAAASEAFARHSAAGL  
KRSGNGVAIVWFRNDLRVVDNEALLKAWVGSSALLPVYFVDPRHFGSTHLFGFPKTGALRAKFLLECLHDLKK  
NLKERGLDLLVKHGSPEDILPSIAKAFGAHTVFAHKETCSEELHVEKLVKGLQQVILPQHRSNPKTVPNPRL  
QLIWGSTMYHIEDLPFDAENLPDVTQFRKSVESKSSIRECNKLPVLSPLPSSSLGEVGGWGSVPVSLGDLGL  
AEPKLDKGMHFIGGENAALGRVYEFWKALILAMNPL

>Dendronephthya\_gig\_XP\_028409958.1\_photolyase

MSRISRKRKPDGVEHEATSEKKKAKSSAESFNMKVRILTGQKDVSSGYQGIVYWMWRDQRVQDNWAMIYAQK  
IAMEHNMPLHVCFALPEKFREASIRQYGFMLKGLQEVEKELKKNLISFHMLLGDPSTTVSKFISSYNIAGVVT  
DFSPLKETRSWLDQVVKTVPSDVAVFEVDADHNIVPCWEASPKLEYAARTIRPKITNQLPSFLTEFPFCVKHPI  
DSKAHKDTNWKNVYKFI EVDQSVPEVSWAIPGTEAGMKRLMTFSEGNLKHFFSTERNDPTKNSLSNLSPWFTG  
QISVQRAILAVSKQKSKWKESVEAFIEESVIRRELADNFCFYNNYDSVDGASEWAKTLRDHVKDKREYIYT  
KEQFETAKTHDRLWNAALQVQVREGKMHGFLRMWAKKILEWTKTPEDALEIALYLNDKYQLDGNDPNGFVGC  
MWSICGIHDQGWSESI FGKIRYMNYEGCKRKFVAAFEDEYK

>Denticeps\_clup\_XP\_028813092.1

MGGNAVHWFRKGLRLHDNPALRDALRGADTLRCVYILDPWFAGSSSVGVSRWRFLQCLEDLDASLRKINSRL  
FVIRGQPTDVFPRLFKEWKVTRLSYEYDSEFPFGKERDAAIRKLANEAGVEVMVRISHTLYDLDKI IELNGGQS  
PLTYKRQSLISRMDAVEMPAETITADVMGRCTTPI SDDHDDKFGVPSLEELGFEVDTLTTAVWPGGETEALT  
RLERHLERKAWVANFERPRMNANSLLASPTGLSPYLRFGCLSCRLFYFKLTDLYRKVKNCVPLSLYGLLW  
REFFYTAATNNPRFDKMEGNPICVQMPWDRNPEALAKWAEGRGTGFPWIDAIMTQLRQEWIHHLARHAVACFL  
TRGDLWISWEEGMKVFEELLLDADWSVNAGSMMWLSCSSFFQQFFHCYCPVGFGRRTPNGDYIRRYLPILRG  
FPSKYIYDPWNAPESVQKVAKCIIGVHYPKPMVNHAEEASRINIEMKQIYQQLSCYRGLGLLATVPSNSSNNG  
ESSMSGAAAGPSSVDSAQEGSAAAAVQQVTSAPQSEAAAQSSWHGDLRYPGTSTRQQHGNLVGGTDESQRQDS  
KMAHAPASQRGKGTIAVKRHNEDLVARSSKVQRQSSH

>Denticeps\_clup\_XP\_028822473.1

MSNARTVICLLRNDLRHDNEVLHWAHNAEHIVPLYCFDPLHYLGTHCFNFPKTGPFRLRFLLDVSKDLRTS  
LEKKGSSLVVRGEPHKVIGDLIRQLGVSVAFAFHEEATQEELKVERQIKDVCSONKVRVQSFVGSTLYHRDD  
LPFNHISRLPDVYTQFRKAVESQGRVRPVTPTPEQLRPLPTGLEEGPIPTFQDLEQTEALTDGRSAFPCCGGE  
TEALARIQHYFWDTDVASYKETRNGLIGVDYSTKFAPWLAGCLSPRHIIHQIKKYEARTANQSTYWVIFE  
LLWRDYFRFVAVKYGNQIFHLNGLQDKKVPWKKDMKLFNAWKEGRTGVFPVDANMRELALTGFMSNRGRQNV  
SFLTMDMGLDWRMGAWEFEYLLVDYDVCSNYGNWLYSAGIGNDPREDRKFNMVKQALDYDNNGDYVRLWVPEL  
QGIKGGDVHTPWTLSAALSHAGVCLNENYPSPTVAPEWSRYVNKRPAAGGAAPSARGKKGPSHTPRSHKDRG  
IDFYFSRSKKL

>Denticeps\_clup\_XP\_028833071.1

MYARLARLIQSARSGKVRRLHDRLLHFPSLIQTLAFGLRDSGKTAFRNHSIKRLACTMPSSSERKRKAKG  
SAAEASTGKKPKPSSAHQTEEAGGWLEARVATLRRQARGFKFNHNRVSI LSVQKIKQGSQGVVYWM SRDQRV  
QDNWALIYAQQLAIEDKLPLHICFCLVPHFLDATFRHYAFMLKGLQEVAKECSALEIQFHLLHGSPGDTLPGF  
VKDWNLGAVVTD FCPRLRETQLWLDDVKKGLSSDVPFFQVDAHNIVPCWVASNKQEYGARTIRGKITKLLPEFL  
TELPVADQHPHSSSKTPKPIDWENTLSSLEVDRSVGEVDWAQPGTTGGFSMLESFIDQRLQYFATHRNPNPVA  
ALSQLSPIWHFGQISAQRVVSILVQTHGKNREAVASFTEELVVRRELADNFCFYNNKYDSVQGAYEWAQKTLQD

HAGDCRKPLYTCEQLEQAQTYDKLWNAAQIQVVTEGKMHGFMRMYWAKKILEWTASPEQALSIAIYLNDRYSL  
DGCDPNCYVGCMWSICGIHDQGWREAVFGKVRYMNYEGCKRKFVDVGQFERKYCSKKP

>Denticeps\_clup\_\_XP\_028838111.1

MSHSCIHWFRKGLRLHDNPALLAALRDCRRLYPIFILDWFAAAAANVGINRWRFLVGALKDLDRLSLRELDL  
FVVRGKPSDVFPELFWREWSVTRLTFTETDTEPYSQQORDKEVLRLAEEHGVEVIQKISHTLYNIERIEENNGKA  
PLTYVRFQTVVKTIQPPQRPLPSPPTLQEMNGKCTETHNEKYGIPTLEELGKDPQLAGPEIYPGGEQEALRRLD  
KYMERTGWVCSFEKPNTSPNALSPSTTVLSPYLKFGCLSVRTFWWRVLVGIYQGKKHSQPPVSLHGQLLWREFF  
YTAGRGISNFDMEGNPVCVRVDWDSNLEYLSAWREARTGFPFIDAIMTQLRQEGWIHHLARHAVACFLTRGD  
LWISWEEGQKVFEELLLDADWALNAGNWQWLSASAFFHQYFRVYSPVAFGKKTDKNGDYIKKYLPILKKFP  
YIYEPWKAPRSVQERAGCIVGKDYPRPIVEHEAVSKKNILRMKAAYAMHSPDTGGPSSKASAGHRLQFPLYEK  
RI

>Denticeps\_clup\_\_XP\_028841978.1

MVVNSVHWFRKGLRLHDNPALQEALNGADTVRCVYIILDPWFAGSANVGINRWRFLLESITDLDTSRLQNL  
FVVRGQPAEVFPRLFKENITRLTFEYDSEPYGKERDGAIIKMAQEFVETTVVRNSHTLYNLDRIEEMNNNSP  
PLTFKRFQAILNRLELPRKPLPAITREQMDSCRTKIADNHDEHYSVPSLEELGFKNVDQTPAVWKGGETEAMD  
RLNKHLDRAKAWANFERPRISVSSLMASPTGLSPYLRFGCLSCRVFYYSRLRELYMKLRKRCSPPLSLFGQLLW  
REFFYTAATNNPNFDRMESNPICVQIPWDHNPEALAKWAEGRTGFPWIDAIMTQLRQEGWIHHLARHAVACFL  
TRGDLWISWESGMKVFEELLLDADWSVNAGSWMWLSCSAFFFQFFHCYCPVGFGRRTDPSGDYIRRYIPKLKD  
YPNRYIYEPWNAPEVQKAANCVVGVDPKPKMINHAESSRLNIERMKQVYQQLSHYRGLSLLASVPTIQEEAE  
PPMSDDSQASGSASDSGKVGWDPSEEQERQT

>Denticeps\_clup\_\_XP\_028853227.1

MTHRTIHLFNKGLRLHDNPSSLAAMESSAAVYPVYVLDRLQMAASAHIGPLRWRFILQSLEDLHSSLQERGS  
LHVLQGPYLDVVRHLVARWGITQISFDSEVEPHCVQLEAGLRGLAGELGLSIIISCVAHITLYDVKRIIKTNDGK  
PPLTYKKFLHVLISFLGEPDKPARDITTADFQKCLTPRQDGDDEKDRVPTFEELGLEVEPEVLWPGGESHALKR  
LEQHFQSQGWVANFSKPRITPNSLLPSTTGLSPYLSLGLSVRTFYHRLSSIYAQSKNHSPPVSLQGQVLWR  
EFFYTASATPNFTKMEGNPICLQIGWYDNQALQKWKGQTGFPWIDAIMTQLRQEGWIHHLARHAVACFLT  
RGDLWISWEEGMKVVRRRVEVSVGGIFTALCVQVFEEYLLDADYSINAGNMMWLSASAFFHHYTRIFCPVRFRGR  
RTDPEGQYLRKYLPLVKNFPSKYIYEPWNAPEEVQLQAGCVIGKDYPLPMVSHQEVSENRNLELMKQVRSEQGN  
TAELTRDVADDPMEIGAKRHAQEEGPGADESAGRSCSSAASSRKRCSGGEHGGGRACSWTPEAVRLPEISS  
EV

>Dermacentor\_silv\_\_XP\_037562602.1

MAAMSHAPAPAPHHQQQVTSAGGGGNSVGERHVHWFVRKGLRLHDQPALRVGLQGARTCRCVYIILDPWFAGSS  
NAGVNKWRFLQLSLEDLDARLRKLNLSRLFVIRGQPADVFPKLFKEWRVTHLTFEQDPEPYGAIRDQKITALAH  
EMGVSVVCEPSHTLYPLERILERHGGKTPLTYRQFQSVVVDMEPPAQPLPAPESLPRTPIDEDHDERFAVPTL  
AELGFDMDNLKAAVWPGGETEALARLERHMERKQAWVASFGSPRMTPKALLASQTGLSPYLRFGCLSRFLYH  
QLADLYRKIRNSNPPLSLQGQLLWREFFYCAATRNPNFDRMHNNPMCVQIPWDVNAEALAKWANGQTGYPWID  
AIMRQLREEGWIIHVARHAVACFLTRGDLWLSWEEGMKVFDLLEDADWSVNAGSWMWLSCSSFFQFFHVVY  
PVRFRGKADPSGDYIRKYLPLVKHFPNNYIHEPWTAPESVQVAARCVVGRDYPLPMVNHQVASHVNLQIRQV  
YQQLTQCCKAPGLFPLSPSASPTECNKQNHFIIDRKLRTKNSRQEDDEEESMEGVV

>Dermatophagoides\_pte\_\_XP\_027196527.1\_uncharacte

MVYLVLQKDLRQFDNPALYHARRQKQVIVVYVMEKRLGLTSKWWLCRSLQTFEELDPFWIPVLYLDNSDK  
ISELFEYLSKYIEIERIHSNGLDFELPDDYDEIHDSFQPNLIFKPEDMIKEYKIFTPFWKSIHANCSPVKPLP  
IPEYSRKNYVDLEFDEYIDLPMKDDSDRWNQMDQYWKIGEKAAQERFESFVKTKLSYDHGRDFFCEDGTSKL  
SPHLRFGEISVRQIYERLNTKSTERFCSELGWREFAYHVNRYHPDMTKIPLNPKYRDFWPEFSDDHLEAWKTG  
NTGFPVIDAAMRDIISTGWMHNRMLVASFLVKNLLIPWQIGEEWFYEHLVDADPAINPFSWQWVAGCGTDS  
VPYFRIFNPMLQGEKFDKSGIYVRKWLPEFADFPLKQNIHQYIIKQPQLCPKNYPKPIIDFKSSRERTLSTFK  
NIVAPKVIQLKKPRLV

>Desmodus\_rotu\_\_XP\_024414631.1

MKMAKEAGVEVVTENSHTLYDLDKIIELNGQKPLTYKRFQAIISRMEPLRPKPVGSVTSQQMERCPAEIQENH  
DETYGVPSLEELGFPTGLGPAVWQGGETEALARLDKHLERKAWVANYERPRMNANSLLASPTGLSPYLRFGC  
LSCRLFYRLWDLYKKVKRNPPLSLFGQLLWREFFYTAATNNPRFDRMEGNPICIQIPWDRNPEALAKWAE  
GKTGFPWIDAIMTQLRQEGWIHHLARHAVACFLTRGDLWVSWESGVRVDELLEDADFSVNAGSWMWLSCSAF  
FQQFFHCYCPVGFGRRTDPSGDYIRRYLPKLKGFPSRYIYEPWNAPESIQKAAKCIIGVDYPRPIVNHAEISR  
LNIERMKQIYQQLSRYRGLCLLASVPSCMEDLSNPVAEPSSSQTGSTSSAGPRPLPTGPASPKRKLEAAEPP  
GEELSKRARVAELPAPELQSRDV

>Desmodus\_rotu\_\_XP\_024435149.1

MGVNAVHWFRKGLRLHDNPALKECIQGADTIRCVYIILDPWFAGSSNVGINRWRFLQLCLEDLDANLRKLN  
FVIRGQPADVFPRLFKENITKLSIEYDSEPFGERDAAIKKLATEAGVEVIVRISHTLYDLDKIIELNGGQ  
PLTYKRFQTLISKMEPLEIPVETITSEVIEKCTTPLSDDHDEKYGVPSLEELGFDTDGLPSAVWPGGETEAL  
TLERHLERKAWVANFERPRMNANSLLASPTGLSPYLRFGCLSCRLFYFKLTDLYKKVKNSSPPLSLYGQLLW

REFFYTAATNNPRFDKMEGNPICVQIPWDKNPEALAKWAEGR TGFPWIDAIMTQLRQEGWIHHLARHAVACFL  
TRGDLWISWEEGMKVFEELLLDADWSINAGSMMWLSCSSFFQQFFHCYCPVGFGRRTDPNGDYIRRYLPILRG  
FPAKYIYDPWNAPEGIQKVAKCLIGVNYPKPMVNHA EASRLNIERMKQIYQQLSRYRGLGLLASVPSNPNGNG  
ALMGYSPGEHIPGCSASCTQSGSILHYAHGDSQQTHLLKQGRSSMGTGLSSGKRHSQEEDTQSIGPKVQRQ  
STN

>Dianemobius\_nig\_BAF45421.1\_cry\_precur

MDNRSNVHKKVAVHRFRHGLRLHDNPALLDAVKDCDAFLPIFIFDGESAGTKLVGYNRMKFLLES LQDIDSQ L  
KKYGGNLYLFHGTPLCVFYISQTIGLHKLCFEQDCEPIWQHRDDL VKKFKCKENG I KCIERSHTLWNPHDVI  
KTNGGIPPLTFEMFVHTVSVIGPPPRPVEDVEWSVVNFVGLPMSSIPSDIKVFKNFPTPEDFGISSEVGNMNR  
IIQWIGGESQALRHLQERLKVEENAFREGYCLPNQARPDLLGPPTSQSAALRFGCLSVRKFYWSIQDMYSSIC  
GPSPNQNITSQLIWREYFYTMSVGNEYAEMDRNPICLNIPWKNDYGSDFNKWKEGKTGYPFIDAIMRQLIQE  
GWIHHVARNAVACFLTRGDLWISWEEGLNFFLQYLLDADWSVCAGNMMWVSSSAFEQLLD CSHCMCPVNYGR  
LDPWGQYIKRYIPELKNYPVEYLYEPWKAPLHVQETAGCIVGKDYP ERIIDHQIASEKNRSYMDEIRNRLMNP  
PPHCRPSSEKETRQFMWFPDDCSEHSSQ

>Dianemobius\_nig\_BCX29417.1\_cry\_2,\_par

FGRVRDQNIMAMCREMGISVISRVSH TLYRLESII EKNGGKAPLTYHQFQT VVASMDSPPPAEPRISARTTDG  
VHTPVTDHDDHDFRGVPTLEELGFDTEGLLPVWVTGGESEALARLERH LERKAWVASFGRPKMTPQSLLASQTG  
LSPYLRFGCLSTRLFYQ L TDLYKKIKKACPPLSLHGQLLWREFFYCAATNNSNFDRMNGNPICVQIPWDKNP  
EALAKWATGQTGF PWIDAIMTQLREEGW I HHLARHAVACFLTRGDLWISWEEGMKVFEELLLDADWSVNAG

>Dicentrarchus\_labr\_AFP33464.1

MVVNTIHWFRKGLRLHDNP SLRDSIRGADSLRCVYIILDPWFAGSSNVGINRWRFL LH CLEDL DNSLRKLN SRL  
YVIRGQPTDVFPRLFK EQINRLSYEYDSEPF GKERDAAIQLKACEAEVEVMQVSHTLYNLVKI IELNDGHP  
PLTYKRFQALINRMDA VELPAETITLEVIRNCATPISEDHDDKFGVPSLEELGFETEGLT TAIWPGGETEALM  
RLERH LERKAWVANFERPRMNAN SLLASPTGLSPYLRFGCLSCRLFYFRLTDLYRKVKNNSPPLSLY GQLLW  
REFFYTTATNNSCFDKMEGNPVCVQIPWDRNPEALAKWAEQ TGFPWIDAIMTQLRQEGWIHHLARHAVACFL  
TRGDLWISWEEGMKVFEEL LIDVDWSVNAGSMMWLSCSSFFQQFFHCYCPVGFGRRTDPNGDYIRRYLPILRG  
FPAKYIYDPWNAPEEVQKAAKCIIGVHYPKPMVNHA EASRVNIERMKQIYQQLSSYRGLGLLATVPVHINNGG  
NGKRVDAGTRQGSAGSCETPSIQEGMSSAERGQFTLKRREEVPLESSSKSWRHSK

>Dicentrarchus\_labr\_CBN81995.1

MSTFRTIICLLRNDLRFQDNELFHWAQRNAEYIVPLYCFDPRHYVGTYNYNLPKTGPFRLRFL L DSIRDLRNT  
LLSKGSNLVVRQ GKPEEVVADLIKQLGSVS AVAFHEEVTSEELNVEKG VKDVC AQMKVKVHTCWGSTLYHRDD  
LPFHHSRLPDVYTQFRKAVETQSRVRPVFPTPEQLKPLPSGLEGA IPTAEDLQQTEPLTDPRS AFPCSGGE  
SQVLARLKH YFWDTDAVATYKETRNGLIGVDYSTKFAPWLAMGCISPRYIYHQIKQYEKERTANQSTYWVIFE  
LLWRDYFKFVG VKYGNRLFQVKGLQDKSIPWK KDMKLFNAWKEGQTGVPFVDANMRELAMTGFM SNRGRQ NVA  
SFLTKDLGLDWRMGA EWFEYLLIDHDVCSNYGNWLYSAGIGNDPREN RKFNMIKQGLDYDSNGDYVRQWVPEL  
QGIKGADVHTPWT LSTAALSHAHVSLGETYPNP I VIAPEWSRHVNKKPSGTGPSQRGKRGPHTPKQHRDRGI  
DFYFSRSKNL

>Diceros\_bic\_KAF5926500.1\_HPG69\_0011

MRQTMRLNLAGVTSLLDLLLGTVPFLHNKRC TVGADPFLLQCLEDLDANLRKLN SRLFVIRGQPADVF PRLFK  
YVIVLIIILN NATVCKIKNNYLIYTPKFYSSKEWNITKLSIEYDSEPF GKERDAAIKKLATEAGVEVIRISHT  
LYDLDKIIELNGGQPPLTYKRFQTLISKMEPLEIPVETITSEVMEKCTTPLSDDHDEKYGVPSLEELGFD TDG  
LPSAVWPGGETEALTRLERH LERKAWVANFERPRMNAN SLLASPTGLSPYLRFGCLSCRLFYFKLTDLYKKVK  
KNSSPPLSLY GQLLWREFFYTAATNNPRFDKMEGNPICVQIPWDKNPEALAKWAEGR TGFPWIDAIMTQLRQE  
GWIHHLARHAVACFLTRGDLWISWEEGMKVFEELLLDADWSINAGSMMWLSCSSFFQQFFHCYCPVGFGRRTD  
PNGDYIRRYLPVLRGFP AKYIYDPWNAPEGIQKVAKCLIGVNYPKPMVNHA EASRLNIERMKQIYQQLSRYR  
GLGLLASVPSNPNGNGGLMGYSPGENIPGCS SSGSCSQSGSILHYAHGDSQQTHLLKQGRSSMGTGLSSGKRPS  
QEEDTQSIGPKVQRQSTN

>Diceros\_bicornis\_minor\_KAF5920599.1\_hypothetic

MAAAAVVTGAGGAPAAAAAAGADGASSVHWFRKGLRLHDNPALLAAVARGARCVRCVYIILDPWFAASSSVGIN  
RWRFL LQSLEDLDTSLRKLN SRLFVVRGQPADVF PRLFKEWGVTRLTFEYDSEPF GKERDAAIMKMAKEAGVE  
VVTENSHTLYDLDR I IELNGQKPPLTYKRFQALISRMELPKKPVGSVTSQQMES CRAEIQENHDETYGVPSLE  
ELGFPT E GLGPAVWQGGETEALARLDKHLERKAWVANFERPRMNAN SLLASPTGLSPYLRFGCLSCRLFYFRL  
WDLYKKVKNRSTPPLSLFGLLWREFFYTAATNNPRFDKMEGNPICIQIPWDRNPEALAKWAEGKTGF PWIDA  
IMTQLRQEGWIHHLARHAVACFLTRGDLWVSWESGVRVFD ELLDADFSVNAGSMMWLSCSAFFQQFFHCYCP  
VGFGRRTDPSGDYVRRYLPKLKGFP SRYIYEPWNAPE SVQKAAKCIIGVDYPRPIVNHAETSRLNIERMKQIY  
QQFSRYRGLCLLASVPSCVEDLSNPVAEPSSQAGSMSSAGPRPPPSGPASPKRKLEAAE EPPGEELGKRARV  
AEPPAPELPGRDV

>Didymodactylos\_carn\_CAF0784413.1

VNQIPETSTGIVYWM SRDQRVQDNWAMLYAQRLALKQQFALHVCFLVPTFLQATIRAYRFMLKGLQECEQEC  
KILNIQFHLLMGAENVLPQFVEKNNIGTVVCDFAPLRVPRSWVENVAKKITTI PVVQVDAHNVPWCWKASPK

LEYAARTIRNKLHQQMDEYFTEFPPLIKHPHSTKHPAEIIDWQKADDCLQVDRVVEVDWAKPGYQGGIEQLE  
SFINTRILHFALGRNDPNKGAISMLSPWLHYGQISPQRALLIISKLRSKYKDSDCDSFIEETFVRRELSDNICY  
YQENYDNLNGAWDWAKKTLNDRNDKRTHLFTRDQFEYAQTYDDLWNASQVQMVKEGKLHGFLRMWCKKILE  
WTKTPEEAIEIAIYLNDKYNLDGRDPNGYVGIMWSLCGIHDQGWRRERPIFGKIRYMNYEGCKRKFDIKTFCEK  
YKSL

>Didymodactylos\_carn\_\_CAF1148914.1

LFFIYSQALSWANNNCNDVLNVYCFDPREITAGTYKYDFPKCGIHRLKFLIETVICLKTLLEEKGSNLFVQRE  
IPEIVILNLVQKFKQHYSITIIHFHQEVTREETDVEAAIRKVAIEHKVNVKEFWGLTLFHPNDLPYTSPKFFPD  
VYTTFRMTLETKNIRVRKLIDCSQQLKPLPDNIEILQVPNLSDFGHSVAEIHAKTVFPFSGGETSALNRLQSY  
VWTKDLVQSYKKTRNSLVNVDHTTKFSAWLSNGSLSPRKIYFEIKRYEKECGINDAGYWIIFEI IWRDFFRFI  
ATKYGNRIFYPSGLSNKKYVWKQDVNLFKEKWRTGHTGCPFVDANMREMLLTGWQSNRGRQNVASYLTKDQLD  
WQYGAEFWESILIDYDVC SNYGNWIYQAGVGNDPREYRHFNMIKQAFDYDPEGEFVRTWIPELAKLPNDLIHT  
PWLASSIELKQANVELGVTYPRPIMIVPQWNNRVRSNVNYICFIILG

>Dimargaris\_cri\_RKP40130.1\_DNA\_photol

MWFRFTDRVSDNTALHYAIAANSRHAAGQVIALYVVSPEEWLLHGVGPIKLDWFWRNLECLHEELALRDIPLVI  
LTARRAADVPHIVTSFCRRMHALLHFFNIEYEVDLARDQRAIELLNSTGGRPAEALHANGSPASTTPTGSP  
PIHVHQFHDQCIVEPGTVLTNEDRPYSVYSPFRRKWYQVFAQNPDFQRLLPAPGIPSPMDRTLNFQKRHPALF  
LTAKQFSSYWAELRGLLPVDLQLDPEASRQAGQRYGVGEKHAQTLLADFTRLVLVSQYKERRDFFGDDAGTSRL  
STYLASGIISPRQCLHAAVDHNDQRLECGDPGAVHWIQLIWRIFYRHVLVAFPRVCKNRAFNPGRDGIQWND  
NPEGYKRWCEGMTGYPIVDAGMRYLNAIGWLHNRLRMVAMFLT KDLLIDWRLGEKHFNRYLIDSDSFASNNGG  
WQWSGSTGTDAQPYFRVFNPLLQSEKFDPSGRFIAQWVPELKPPLYDKGIKRTADSKSKLPIHAPYERLSTTEF  
KSLGYPKPIVEHHKAKDIAIKVFEAALKKKP

>Dinothrombium\_tin\_RWS08790.1\_photolyase

MSQSNARRKVEHRQSAVKVKQEVCDENDSDGDNDPCSAIRKSRSLIARSINEFNFNKKRVRVLSDESEVCE  
CKSIIYWITRDARVEDNWSMLYAQRSLKFNVPPLYVCFCLVPKFLNATKRQYNFLLKGLQEVERDCHNLNIPF  
RLIDGEASQVLPLFAKQHDAGAIVTDFSPLRIKRDWIENLKVKLHNIPICQVDAHNIIVPCWVASPKLEYGAR  
TIRKKIHDKLAEFLLTHFPVIRSPFECEIKSNNWDAALKSLQIDDETVDVVKWAVPGTEAGIRMLISFCNERL  
KDYASKRNNPNYNCLSNLSPWFHFGHLSVQRAILEVKKYSNKYKESVDAFIEEAIIRRELAENFCYNDKYDS  
LEGAWDWAKITLKAHEKDKRPYIFSKEQLEKAQTLDPWNAAQRMQMLREGKMHGFLRMWAKKILEWTKSPEE  
ALEIAIFLNDKYNLDGRDPNGYVGCMWSICGVHDQGAERPIFGKIRYMNYEGCKRKFDVSEFENKYKP

>Dinothrombium\_tin\_RWS10201.1\_cry-2-like

MNGIYWFRKALRLHDNPALSEAVEKCELTFLPLFILDPSIRSFVKVGANRWRFLVQSLQDLDRSLREANLRLIV  
IRGTPKDLMPKLIDKWKINLIAYEMDTEPFAIKRDQEI DQIANKLKVELIKRVSHLTLYDPNDILRNSASKSTP  
FTYQGFLTTL SKMGSLSPLPVPDFSHLHPIEKYLKNEPCELPTEELGIKESECGPCLFPGGETEAIKRMEQ  
TLSDHKWVVSFAKPNTSPNSLKPSTTVLSPYLKFGLSCRRLYFKLKEIESKSSKCTQPPVSLVGQLLWREFF  
YANAALTPNFDKMGVNPICKQIEWDKNDEHLKAWKEGRTGYPFIDAIMIQLKTEGWIHHLARHAVACFLTRGD  
LWISWEDGLKVFEELYLLDADWSLNAGNWLWLSASAFFHQYFRVYSPISFGKKTDPNGDFIRKYIPVLRFRPKE  
HIYEPWKAPKFVQQCKCLIGVDYPKPIVDHETVRKINLSKMAKAYANNAESIVEETGDVLMSPKKKKKI

>Dracunculus\_med\_VDN58570.1\_unnamed\_pr

MATNSKRIHQNLNQMI FNGGKYILYIMRCIRQKSSPALTF SCKRANLLNVPVISAFFYDYQNHNKAQRVFLME  
GLIEVKKKMNSSGIPLICLKANNKTAVQIAADLSKWACEVVIDAGYLRHERLFEENLNNVLVDGNRRLTRVEG  
NVVVPVTLASSLLEFGARTLRPKIWQH VADMLKEKWNDQPIVQCKDLKSVVDVKLDYMDLSVELKEALEQRNS  
KNKFIGGENEASKTLDDFISKINGYETKRNI PGTDYQSSLSPYLHYGMINPVDIIRRVNESKVNKASKDAFI  
EELLVRREL SHNFVYYAMDNYDKMHGYLRMYWAKKVIEWTPSYQH ALDFLIEQNDKYELDGNDPNGYAGVFWN  
FGLHDRAHAERKIFGKLRYMNAEGLRRKYKNNIEKFVEINRYLANRQLDEPLPKSKSKS

>Dreissena\_poly\_\_KAH3736653.1

MDEAPKRNVLHWFRLRLHDNP SLREALDGANSFRCVYILDPWFAGVSQVGINRWRFLQLCLEDLDSSLRKL  
NSRLYVVRGPADVF PKLFKEWNINVLSFEEDPEPFGRSRDSAISALAQEIGVEMIVRISHTLYDLQKIISEN  
NGTAPLTFKRFQSVLSRMDPPAKPEDRISLDTICQCRTPIALDHDDKYGVPTLDELGFDTSGLSSKVFRGGES  
EALQRLHRHLERKAWVASFEKPKMTS QSLFSPQTTLSPYLRFGCISPRLFYWKLQELRYKIKKQNDPPLSLHG  
QLLWREFFYLTATNNPNFDMKMEGNAICVQVPWDKNPEALAKWAEKGTFPWI DAIMVQLREVGWVHHLGRYAI  
ACFLTRGDLWISWEEGFKVFDELLLDADWSVNAGMWLWLSCSSFFQQLNCYCPVGF GKQADPTGDFIRHYLP  
VLKGFPPQYIYEPWNAPESVQVAAKCI VGKDYPVPMVNHA EASKLCMERMKQVYQMLLKRRAKVQLPKQIAYK  
ATEQEVS EDKPTREIGVEWFQEGFHVAALIESEIGVEWLQKGYVY TALLESEIGVGFGHKGFI GFHVGFHKG  
HEGFHEGFHKGFIHKGFIHNGFRKDFMWLPFLN

>Dreissena\_poly\_\_KAH3738683.1

MATSTMPPAQTSSDSVEVKVVAIHWFRHGLRIHDNPALLETVEEGWELYPVFI FDGEVAGTRTAGYNRMRLI  
ESLRDLDETFNNYGGRLYVFTGDL MNILGNLIKEWNVSRLSFDADVEAIWHKRDQDVRRLCSEL DVEVVERVS  
HVLWDPKDILENNGGKPLTYSLFNQVARAVGDPKTVDDPDFSKVTFKVKS NHDKLFGI PDVETLGVFPECE  
QQNQRRHNNWVGGETRALQLLSQRMQVEKMAFSVGMVMPNQTFPNVSGPPLSMSAHLRFGCLSIRKLYWVLRNA

FEKSHPGKGFSNSAIGQLLWREYFYTMSVNNINYNIDKMEENPICLNI PWYNDQEKLLKKWENGETGFPWIDAIMK  
QLKHGEWIHHVCRHATSTFLTRGDLWLNWVDGLKVFTKYLLDADWSVCAGNWMWSSSAFEKVLQCPKCFPCPV  
RYGRKMDPDGVYIRRYLPVLKDMPLRYLFEPWKAPKSVQEKANCIIGVDYPLPMVEHGKASKQCYNMMMEVK  
KLLATGKEMELCGPANTEEVAQFVWMPGNHAGTCHQGEEANPSMLCDGLMGM

>Dreissena\_poly\_\_KAH3779326.1

MSKRQEIDKILTEFTSGSIAADECFLILSLCGLQEIESRFLTLIQGLRPRYGELYNRLCNVYMGYFDIKPSQ  
IPSFLPDLRAVENGYATDYGSNNIGFELDMELALKLSEQEYTALNNGYSKAQTSKSPGFSSKPPGFSSNPP  
GFSSKPPGFSYAGALKTGSNMPVTFSAAKPLNNQLDNVKHTYTPVKTVLQACNSKDKTEASGTAEDSIGQN  
SDVTEKPKQKRKKKKNRVDRPLSNPSVIFWFRRDLRVYDNPALVAASQSGAPVPIPIFLWSDREEGPQKT  
LATG AATKYWLYMALPKLNSDLNNQFNNSIIYRKADNYLNELLDLFKSSGAKTLIINDVYEPFLKSRDDKICS  
VLKS KGIKCERHHSYLLHEPGTIKTESLCMRGMSVTHFMEMCRQCSTSPIGLPIDPPECLPAGTYRPESMPLEMLD  
LGKLPKRKDGTVIDWAKI IRESWDFSETGAWEALQLFLNDGVRRYEKESSRGDQLNTCRISPYLHFGQISPR  
T VLCEGRHMKSPKFLRKLAWRDL SYWMLS VLPDL PSEPSRPQYI HQRSQNKTHL KAWQKGNTGYPLVDAPMR  
Q LWLTGWMNNYMRHVVASFLISYLHISWVEGYLWFQDTLLDADVAINAMMWQNGGMSGLDQWNFMHPVDAAM  
T CDPKGDYVRKWVPELAKLHEDFIHQPWKAPPSILRRAGIELGVNYPHRIITELEEAREQSLRDVVEVRQKFPE  
MIDPKTGNDLVR LPSGVRVPVITRKEFKYKTSNPDGNENPHNAVLRGYRGRKRDELVEFFNQRDFLASTMKEC  
TSRHENGLKQMDLSFL

>Dreissena\_poly\_\_KAH3805941.1

MSSSSSKEEKKRKLENGGSDEPSPKKTQVEDLASRISEARKSLCSSVADFKFNKKRVKVLKSSEDIPNECDGI  
VYWM SRDQRVQDNWAFLYAQKLALKLEVPLHVCFLVPKFLEATIRHFTFMLEGLKEVEKECTELGISFHLLI  
GHAKDRLPQFVAENKIGGVVTFDSPLRVPMWVDDVGKALPKNIPFCQVDAHNLVPCWEASPKLEYGARTIRN  
KIHNLQAGYLTEFPVCKHKHTAPDSKSVDWAAAYASLEV DLSVKPVDWAKPGSSHGIKMLESFCKDRLKDFA  
TDRNPNKNALS NLSPWIHFQQLSAQRCILTVRQYKAKHKE SVDAYIEEAVIRREL GDNFCYNNKKYDSIEGA  
YDWAKKTLQDHEKDKRDH VYTREQLERGKTHDPLWNAQNQM VLEGKMHGFLRMYWAKKILEWTPSPSEALS  
Y SIYLN DKYSLDGRDPNGYVGC MWSICGIHDQGWAE RAVFGKIRYMNYQGCKRKFDVTKFEMRYRKQTTEK

>Dromaius\_novaehollandiae\_XP\_025957051.1\_cryptochro

MPHRTIHLFRKELRLHDNPTLLAALESSEVVYPIYILDRKFMTSMVNIGALRWHFLLQSLENLQKNLLQLDSC  
LLVIQGEYGAVLRDHVKKWNITQVSLDAEVEPFYKEMEANIRSLGEE LGFEVLSLIGHSLYDAKRILDNNGGT  
PPLTYKRFLHILSLLDPEAPVRNLA AEDFQRCRPPDLCLAE CYRVPLPVDLKI PTECLSPWKGETEGLQRL  
EQHLMNQGWVASFTKPR TIPNSLLPSTTGLSPYFSLGCLSVRSFFYRLSNIYAQSKHSLPPVSLQGQLLWRE  
FFYTVA AATPNFTKMSGNPICLQINWYEDAERLHKWKTAQTGFPWIDAIMTQLRQEGWIHHLARHAAACFLTR  
GDLWISWEEGMKVFEEMLLDADYSINAGNMMWLSASAFFHQYTRIFC PVRFGKRTDPEGQYIRKYLPI LKNFP  
SKYIYEPWTASEEEQKEAGCIIGQDYPFPMVNHKEVSDHNLQ LMKQVREEQYRTAQLTRDDADDPMEMKIKRD  
HSEENVKKGKVARTTEQT

>Dromaius\_novaehollandiae\_XP\_025963309.1\_cryptochro

MAAAASATPRGPCRSVHWFRRLRLHDNPALQAALRDAVALRCIYILDPWF AASSAVGINRWRFLQLSLEDLD  
NSLRKLSSRLFVVRGQPTDVFPRLFKEGWVTRLTFEYDSEPFGERDAAIVKLAKEAGVEVVIENSHTLYDLD  
RIIELNGHKPPLTYKRFAQIISRME LPKKPVSSIISQQMATCHKVDIQENHDDVYGVPSLEELGFPTDGLAPAV  
WQGGETEALARLDKHLERKAWVANYERPRMNANSLASPTGLSPYLRFGLSCRLFYRLWELYKKVKRNSTP  
PLSLYGQLLWREFFYTAATNPNKPFDRMEGNPICIQIPWDRNPEALAKWAE GKTGFPWIDAIMTQLRQEGWIHH  
LARHAVACFLTRGDLWISWESGVRVFD ELLLDADFSVNAGSWMWLSCSAFFQQFFHCYCPVGFGRRTPSGDY  
VKRYLPKLKGFPSRYIYEPWNAPESVQKAAKCIIGVDYPKPMVNHAETSRLNIERMKQIYQQLSRYRGLCLLA  
SVPCVEDLSGQVADPALGHSSSTSTVMRLPQSDQTS PKRKHEGA EELCTEELHKRAKVGGLPAP EIPGKSL

>Dromaius\_novaehollandiae\_XP\_025973731.1\_cryptochro

MGVNAVHWRKGLRLHDNPALRECIQGADTVRCVYILDPWFAGSSNVGINRWRFLQLCLEDLDANLRKLNSRL  
FVIRGQPADVFPRLFKEWNI AKLSIEYDSEPFGERDAAIKKLASEAGVEVIVRISHTLYDLDKI IELNGGQP  
PLTYKRFTLISRMEPLEMPVETITPEVMEKCTTPVSDDHDEKYGVPSLEELGFDTDGLPSAVWPGGETEALT  
RLERHLERKAWVANFERPRMNANSLASPTGLSPYLRFGLSCRLFYFKLTDLYKKVKKNSSPPLSLYGQLLW  
REFFYTAATNPNRFDKMEGNPICVQIPWDKNPEALAKWAEGR TGFPWIDAIMTQLRQEGWIHHLARHAVACFL  
TRGDLWISWEEGMKVFEELLLDADWSVNAGSWMWLSCSSFFQQFFHCYCPVGFGRRTPNGDYIRRYLPVLRG  
FPAKYIYDPWNAPESVQKAAKCIIGVNYPKPMVNHA EASRLNIERMKQIYQQLSRYRGLGLLATVPSNPNGN  
NGGLMGYS PGENISACGSTGGAQLGTGDGHTVGVTALGDSHTGASGIQQQGYCQASSILHYAHGDNQQSHL  
LQTVLLEENIPDKEDKGQNYDTLYWN

>Dromaius\_nov\_XP\_025949274.1\_photolyase

MVEEVLFLFTGIVCHHATLARLVIPSATAWSRPWRLQYLSQHCPPTRTVLRMPKKKGKRKAGQGSEPEAE  
PDAT ELPRLSPKRNKEEAAMGKLQEAVREARRKAAPSVQEFKYNKKRVRLISQRSDLKDNAECILYWM SRDQRVQD  
NWAFLYAQRLALKQELPLHVCFLVPKF LDATIRHYGFMLRGLQEVAKECTELNIPFHLLXGYAKDVLPTFV  
V RLGVGGLVTD FCP LRVPPQWVEDVRERLPEDVPFVQVDAHNIVPCWVTSPKQEYNARTIRSKIHSQ  
LPEFLTE FFPVIQHPYSPSTPAEPIAWEACYSSLQVDCTVKEVEWATPGTASGLTVLQSFI AKRLKS  
FSGSHRNPNKAAL SNLSPWFHFGQVSTQRAILEVQKHHKKYKESVDIFVEEAVVRRELADNFCYNNKNYDSV  
QGAYDWAQTTLKLH

AKDKRPFLYELQELEKGNTHDPLWNAAQLQMVREGKMQFAVYLNDRYELDGRDPNGYVGCLWSICGIHDHGWP  
ERAVFGKIRYMNYAGCKRKFDVVQFERRYAPCKLKD  
>Dromaius\_nov\_XP\_025952431.1\_cry\_DASH-1  
MSAAGRTVLCLLRSDLRAHDNEVLHWAQSNADCVVPLYCFDPRHYVGTHCHGFPKTGPHRLRFLLESVRDLRE  
TLKKKGSTLVVRKGKPEDVVHDLITQLGSVSAVAFHEEATKEELDVEKGLCQVCGQHGVKIQTFWGSTLYHRD  
DLPFRPITRLPDVYTEFRKAMETEAKVRPTLHMADQLKPLAAGVEEGCIPTMEDLGQKDFVTDPRTAFFPCSGG  
ETQALMRLQYYFWDTNLVASYKETRNLIGMDYSTKFAPWLALGCISPRYIYEQIRKYEKDRATANQSTYWVLF  
ELLWRDYFRFVALKYGRRFFSLRGLQGKEVPWKKDLQLFDCWKEGKTGVPFVDANMRELAATGFMSNRGRQNV  
ASFLTDLGLDWRMGAEWFEYLLVDYDVC SNYGNWLYSAGIGNDPRDSRKFNMIKQGLDYDGS GDYVRLWVPE  
LQGIKGGDIHAPWALSSASLSQAGITLGETYPRPVVTAPEWSRHISQRPQGRGPHPKGRKGAQTTPMQHKDRG  
IDFYFSRKKDL  
>Dromiciops\_glir\_XP\_043823907.1  
MGVNAVHWFRKGLRLHDNPALKECIEGADTVRCVYIILDPWFAGSSNVGINRWRFLQLQCLEDLDANLRKLNSRL  
FVIRGQPADVFPRLFKEDIKLSFEYDSEFPFGKERDAAIKKLASEAGVEVIVRISHTLYDLDKI IELNGGQP  
PLTYKRFQTLISKMEPLATPVETLTPEMMNKCVTPLSDDHDEKYGVPSLEELGFDTDGLPSAVWPGGETEALT  
RLERHLERKAWVANFERPRMNANSLASPTGLSPYLRFGCLSCRLFYFKLTDLYKKVKKNSSPPLSLYGQLLW  
REFFYTAATNNPRFDKMEGNPICVQIPWDKNPEALAKWAEGRTGFPWIDAIMTQLRQEGWIHHLARHAVACFL  
TRGDLWISWEEGMKVFEELLLDADWSINAGSWMWLSCSSFFQOFFHCYCPVGFGRRTPNGDYIRRYLPVLRG  
FPAKYIYDPWNAPEGIQKVAKCVIGVNYPKPMVNHAEEASRLNIERMKQIYQQLSRYRGLGLLASVPSNPVNG  
GLMGYTPGENISAGSSSSGAVPATANDGQTLKGCVPEPTTGASGTQQQGRSTLSGNKRPRQEEDPQSAGPKV  
QRQSTN  
>Dromiciops\_glir\_XP\_043826737.1  
MAATIVTVTAASAVPAPALAPAPTPTPTPTPTPTPTPTPTPAPEEGASSVHWFRKGLRLHDNPALQAALR  
GARCVRCVYIILDPWFAASSSVGINRWRFLQLSLEDLDISLRKLNSRLFVVRGQPTDVFPRLFKEWGVTRLTFE  
YDSEFPFGKERDAAIVKMAKEAGVEVVTENSHTLYDLDR I IELNGQKPPLTYKRFQAI ISRMELPKKPVSCVTS  
QQMERCQAEIRENHDDAYGVPSLEELGFPTDGLGPAVWQGGETEALARLDKHLERKAWVANYERPRMNATSL  
ASPTGLSPYLRFGCLSCRLFYRLWELYKKVKRNNSPPLSLYGQLLWREFFYTAATNNPKFDRMEGNPICIQI  
PWDRNPEALAKWAEKGTGFPWIDAIMTQLRQEGWIHHLARHAVACFLTRGDLWVSWESGVRVDFELLLDADFS  
VNAGSWMWLSCSAFFQOFFHCYCPVGFGRRTPSGDYVRRYLPQLKGFPSRYIYEPWNAPESVQKAAKCIIGV  
DYPKPIVNHAETSRLNIERMKQIYQQLSRYRGLCLLASVPSCMEDLSTPMAEVS VGQASSVSGAGPKALPCGP  
ASPKRKLDTTEEASGEEHSKRARGMAALSIAELAVKDA  
>Dromiciops\_glir\_XP\_043854557.1  
MAPKKRSHSTSGEPEKMESQENKAKRKPLQKHQFSKSNMVQKEEEDKKEAEKKGGAEGLQEVRQSRRLRTAHS  
VLEFRFNKQVRRLISQDCHLQDHSQAFVYWMSRDQRVQDNWAFLYAQRLALKQKLPLHVCFLAPCFLGATIR  
HYDFMLRGLLEEVAEECEKLCIPFHLLGLPKDVLPAFVQTHGIGGIVTDFSPLLHHTQWVKDVQDALPKQVPF  
VQVDAHNIIVPCWVASDKQEYGARTIRHKIHDRLPFLTEFPVICHYPYPSNIQAEFPVDWNACRAGLQVDRSVK  
EVSWAKPGTASGLTMLQS FIAERLPYFGSDRNNPNKDALS NLSPWFHFGQVSVQRAILEVQKHSRYPDSVAN  
FVEEAVVRRELADNFCFYNNKYDKLEGAYDWAQTTLRLHAKDKRPHLYSLEELESKTHDPLWNAAQMOMVKE  
GKMHGFLRMYWAKKILEWTRSPEEALEFAIYLNDRFQLDGRDPNGYVGC MWSICGIHDQGWAEREVFGKIRYM  
NYAGCKRKFDVAEFERKYSPAD  
>Drosophila\_mel\_BAA12067.1\_photolyase  
MDSQRSTLVHWFRKGLRLHDNPALSHIFTAANAAPGKYFVRPIFILDPGILDWMQVGANRWRFLQQTLEDLDN  
QLRKLNSRLFVVRGKPAEVFPRIFKSWRVEMLTFTETDIEPYSVTRDAAVQKLAKAEGVRVETHCSHTIYNPEL  
VKAKNLGKAPITYQKFLGIVEQLKVPKVLGVPEKLLKMPPTPKDEVEQKDS AAYDCPTIKQLVKRPEELGPNK  
FPGGETEALRRMEESLKDEIWARFEKPNTAPNSLEPSTTVLSPYLKFGCL SARLFNQKLKEI IKRQPKHSQP  
PVSLIGQLMWREFYITVAAAEPNFDRLGNVYCMQIPWQEHDPHLEAWTHGRTGYPFIDAIMRQLRQEGWIH  
LARHAVACFLTRGDLWISWEEGQRVFEQLLLDQDWALNAGNWMWLSAFAFFHQYFRVYSPVAFGKKTDPQGHY  
IRKYVPELSKYPATCIYEPWKASLVDQRAYGCVLGTDPHRIKHEVVHKENIKRMGAAYKVNREVRTGKEEE  
SSFEEKSETSTSGKRKVRRATGSAPKRKR  
>Drosophila\_mel\_NP\_523653.2\_photorepai  
MFTLASYWRESFKIVLPLQAMKRKAQKAGPSKKAANEKASSEPKSDQESSDEEASTSKALLVSKPDYQNF  
QFLTHLEHQVCTAANIQEF SFRKKRVRLSKTEDVKESSLG VVYWMSRDGRVQDNWALLFAQRLALKLELP  
LTVVFCVLPKFLNATIRHYKFMGGQLQEVEQQCRALDIPFHLLMGSAVEKLPQFVKSKDIGAVVCDFAPLRLP  
RQWVEDVGKALPKSVPLVQVDAHNVPLWVASDKQEYAARTIRNKINSKLGEYLSVFPVVRHPHGTGCKNVN  
TVDWSAAYASLQCDMEVDEVQWAKPGYKAACQQLYEFC SRRLRHFNDRNDPTADALSGLSPWLHFGHISAQR  
CALEVQRFRGQHKASADAFCEEAIVRRELADNFCFYNEHYDSLKGLSSWAYQTLDAHRKDKRDP CYSLEELEK  
SLTYDDLWNSAQLQLVREGKMHGFLRMYWAKKILEWTATPEHALEYA ILLNDKYS LDGRDPNGYVGC MWSIGG  
VHDMGWKERAI FGVRYMNYQGCRRKFDVNAFVMRYGGKVHKKK  
>Drosophila\_mel\_NP\_732407.1\_cry

MATRGANVIWFRHGLRLHDNPALLAALADKDQGIALIPVFIFDGESAGTKNVGYNMRFLDLSLQDIDDDQLQA  
ATDGRGRLLVFEGETPAYIFRRLHEQVRLHRICIEQDCEPIWNERDESIRSLCRELNIDFVEKVSHTLWDPQLV  
IETNGGIPPLTYQMFLHTVQIIGLPPRPTADARLEDATFVELDPEFCRSLKLFEQLPTPEHFNVDNMGFLA  
KINWRGGETQALLLLDERLKVEQHAFERGFYLPNQALPNIHDSPKSMSAHLRFGLSVRRFYWSVHDLFKNVQ  
LRACVRGVQMTGGAHITGQLIWREYFYTMSVNNPNYDRMEGNDICLSIPWAKPNENLLQSWRLGQTGFPLIDG  
AMRQLLAEGWLHHTLRNTVATFLTRGGLWQSWEHGLQHFLKYLLDADWSVCAGNWMWVSSSAFERLLDSSLVT  
CPVALAKRLDPDGTIYIKQYVPELMNVPKEFVHEPWRMSAEQQEQYECLIGVHYPERIIDLSMAVKRNMLAMKS  
LRNSLITPPPHCRPSNEEEVRQFFWLADV V

>Dryobates\_pube\_\_KfV67658.1

RFLQLSLEDLDNSLRKLNSRLFVVRGQPTDVFPRFLKEWGVTRLTFEYDSEPFGKERDAAIVKLAKEAGVEV  
IENSHTLYDLDRIIELNGHKPPLTYKRFQAIISRMELPKKPVSTVISQQMETCKVDIQENHDDVYGVPSLEEL  
GFPTDGLAPAVWQGGETEALARLDKHLERKAWVANERPRMNANSLASPTGLSPYLRFGCLSCRLFYRWE  
LYKKVKRNSTPPLSLYGQLLWREFFYTAATNNPKFDRMEGNPICIQIPWDRNPEALAKWAEGKTGFPPWIDAIM  
TQLRQEGWIHHLARHAVACFLTRGDLWISWESGVRVFEDELLDADFSVNAGSWMWLSCSAFFQQFFHCYCPVG  
FGRRTDPSGDYVKRYLPKLGKGFPSRYIYEPWNAPEVQKAAKCIIGVDYPKPMVNHAETSRLNIERMKQIYQQ  
LSRYRGLCLLASVPSCVEDLSGPVTDASAGQGCSTSTALRLSQAQASPKRKHEGAEELCTEELYKRAKVT  
ELPAAELPGKS

>Dryobates\_pube\_\_KfV69614.1

DNWAFLYAQRALAKQELPLHVCFLVPKFLDATIRHYSFMLRGLQEVAKECAELNIPFHLLGYAKDVLPTFV  
VEHGVGGLVTDFCPLRLPRQWVEDVRERLPEDVPFAQVDAHNIVPCWVASPKQEYSARTIRGKIHAQLPEFLT  
EFPPIIIRHPYTSSCLAQPIAWVCYSSQLQVDHTVKEVEWATPGTAAGLAVLQSFITERLESFGSHRNDPNKAA  
LSNLSPWFHFGQVSTQRAILEVQKHRDKYKESVDVFVEEAVVRRELAENFCYNNENYDSVQGAHDWAQTTLKL  
HSKDKRPFYLTLEELEHGTTDPLWNAQLQMVREGKMHGFLRMWAKKILEWTRSPEEALQFAIYLNDRYEL  
DGRDPNGYVGCLWSICGIHDQGWAEAVFGKIRYMNYAGCKRKFDDVQGFERRYAP

>Dryobates\_pube\_\_KfV74926.1

RFLQLCLEDLDANLRKLNSRLFVIRGQPADVFPRFLKEWSIAKLSIEYDSEPFGKERDAAIKKLASEAGVEVI  
VRISHTLYDLDKIIELNGGQPPPLTYKRFQTLISRMELPEMPVETITPEVMAKCTTPVSDDHDEKYGVPSLEEL  
GFDTDGLPSAVWPGGETEALTRLERHLERKAWVANFERPRMNANSLASPTGLSPYLRFGCLSCRLFYFKLTD  
LYKKVKKNSSPPLSLYGQLLWREFFYTAATNNPRFDKMEGNPICVQIPWDKNPEALAKWAEGRTGFPPWIDAIM  
TQLRQEGWIHHLARHAVACFLTRGDLWISWEEGMKVFEELLLDADWSVNAGSWMWLSCSSFFQQFFHCYCPVG  
FGRRTDPNGDIIRRYLPVLRGFPKAYIYDPWNAPEVQKAAKCIIGVNYPKPMVNHAEEASRLNIERMKQIYQQ  
LSRYRGLGLLATVPSNPNGNGGGLMSYSPGESISGCGSTGALFSASPGAQLGTGDGHTGVQSCPLGDSHTGA  
SGIQQQGYCQASSILHYAHGDNQQPHLLQAGRTALGTGISAGKRPNPEEETQSVGPKVQRQSTN

>Dryobates\_pube\_\_XP\_009894705.1

MSHRSIHLFRKGLRLHDHPALLAALQSSQLLYPLYILDQQFLSSVMHMGALRWHFLLQSLQDLQESLCQLGSC  
LLVVQGGQYEAVLRELQVQWNISQVTLDAEVEPFYKEMEARIICLGEELGFEVLSLVGHSLYDTRKRVLELNGGS  
PPLTYKRFHLHLSLLGDPPELFPVRLTAEDFQRCQAPAPGLAELXRVPLPGDLQMPPELSLSPWRGGETAGLRL  
EQHLADQGWVTAFAKPRITPNSLPPSTGLSPYFSLGCLSVRTFFHRLAKIYAQAKHSLPPVSLQGQLLWRE  
FFYTVASATPNXXXXXXXXXCCQISWAEDAERLHRWKTVRGSPGIDAIMTQLRQEGWIHHLARHAAACFLTRG  
DLWISWEEGMKVPPCSAVVFLGLDGEPCGRKYLPIILNFGSKHIYEPWTASEEEQKQAGCIIQDYPPFM  
VNHKEVSEHNQLQMKQVREEQHRTAQLTRGETEDPMELKARCDHSEEDLPKGKVAKVAEXSPAGLSCWGPTRW  
QRGQPEAT

>Dryobates\_pube\_\_XP\_009897427.1

GAAGPAFCLLRCDLRVHDNQVLHWAQSNADFVIPLYCFDPRHYLRTHCYGFPKTGPHRLRFLLESVKDLRETL  
KKKGSTLVVRKGKPEDVVSDDLITQLGSVSAVAFHEEATQEELDVEKGLCQVCSQHGVKVHTFWASTLYHRDDL  
PFRPIARLPDVYTHFRRAAESEAKVRPTLRMADQLKPLAPGVEEGCIPTMEELGQKDPVTEPRTAFPCSGGET  
QALTRLQYYLWDTNLVASYKETRNLVGMDDYSTKFAPWLALGCISPRYIYEQIQKYEKERTANSTYWVLFEL  
LWRDYFRFVALKYGTRIFSLRGLQNKEMPWKDLRLFDCKWDGRTGVPPVDANMRELAATGFMSNRGRQNVAS  
FLTCDLGLDWRMGAEWFEYLLVDYDVCSNYGNWLYSAGLGNDRDSRKFNMVQGLDYGSGDYVRLWVPELQ  
GIKADIHTPWVLSSAALSQAGVTLGETYPEPVVTAPEWSRHISQRPQGRGPHPRGRRGPTHMPAQHKDRGID  
FFFSRKDKAR

>Dryodora\_gla\_AQX17841.1\_putative\_p

MSAVGVHWFYRGLRLHDNAPLLKAISSCSTLIPLYIIDTDYFTPSSCGINRMGFLDLSLKALDEDLREKGSKL  
FVAKGKPCDILRTIIQQNKVEILTFERDTEPYNRAMDESVSMAESLKIDVSALWGHTMFDPEYLLGLNNGSA  
PLTMTSFQKLMYVTGHPPKPLDPPGKITPPPEGLRCEGVHLPNPPSLEDLNEFNFKQEDKTTWFVAGEKEA  
MKVMEKFFAQKRRTANFEKPKTSPTALEPDTTALSPLYMSRGSLSRLFYHRLKDTVKDFKNASKPPVSLQGQL  
YWREMAYLIGFSTPNFSQMKGNPICKQIPWQTGPDAKILLEKWESEGQTGFPAVDAMNQLKTEGWMHHLARHL  
VACFLTRGDLWVSWEMGRDVFDKHLVDADWSINNFSWHWLSCSAFFHQYFRCYSPIAFFKKTDPNGAYIKKHV  
PMLSKFPAKYIYEPWTAPKATQEACGCVIGRDYPMVMDHSTVNKINMGKMKKAYDAAKPLDRGKKRETGKD  
SPAARKQSTLSNFSSEKRINC

>Dunaliella\_sal\_AAX56342.1\_6-4\_photol

MLRCAQPKYAPLKRQAFNQKLNRLVAAARTPSKSSSTSRMASTSSGQQGRSILWFRKGLRLHDNPALRDACTG  
SAAVFPIFIIDPYFLQKSNNKGVNRYQFLLESLSDLNSSLTSLGSQLLVLRGTPEEVI PRVLRDWSIKKLCY  
EIDTEPYAKARDARVDDMAREAGVEVKHWSHTLYD TDMLVRENKGKAPLTMQAFEKLVDRVGHPALTALPAPT  
ARLPPVDVSLPGIKDAEVGVPTWQEMGFKEAPTAIFKGGETEALKRLEHYMKD TKWXASFEKPSTDP SAFPTEP  
STTALSPYLKFGCLSARFFHQRLLDVYRLHPKHSQPPMSLRGQLLWREFFYTLGSHTPNFDRIAGNPICRQIT  
WDTNPALLKAWRDGATGYPWIDAAMTQLREWGWMHHLARHSVACFLTRGDLYLSWESGKEVFEELLLDADYFI  
NAANWMWLSASAFFAQYFRVYSPVVF GKKYDKEGAYIRKFLPVLKDMPAKYIYEPWTAPKEVQQRANCIIGRD  
YPAPIVDHAVASKECIARMGAAYKATNTGGSAGKASPAKAASSGDAGTSASAGAPSSSKKTTGKRAASADQGG  
KRQKTLEESMTKKRCQ

>Dunaliella\_sal\_ABK76277.1\_CPD\_photol

MPKRKAQHPPEDDPSAGNAGPSSQPSSANHLVDQRRVSELLSGNNSPTPPVVYWMSRDMRVSDNWALLQGCQ  
EALQRLQLASHADTAAAAAATAAHSSPALAQPPLVVAFNLVPQFLGAGARSFCF MLKGLRELETKLRQFNIP  
FYLLRGQPEDTIPQLVDALRAGLVVSDYSPLRLSKQWKQVAAKLQAKGVGFQVVD AHNVPVPAKIASNKREYA  
ARTIRPKIEKLLPEFLIEFPNQGLPPIMPTAGQGPHPTPIDWPALLAEVTEAGAAVPEVDWITPGEAAAARAA  
LDGSQGFLTTPRIAQYHVKRNDPSC TTGLSNLSPYLHFGQLSAQRAALEASKLRSRHREAVDRYLEELIVRRE  
LADNFCHECPDYDKLVPGTAYDWALKSLEKHKRDRPITYTRQQLES GHTGDDLWNAGQMELV RQGKMHGYIR  
MYWAKKILEWSGTPEEAVENAIYLN DKWSLDGRDPSGYTGMWSVAGVH DRAWIDRPIYGKIRVMTYDGCKGK  
FDVPAYVAYVESLGRARQ

>Dunaliella\_sal\_DNA\_photolyase\_KAF5834002.1

MAMEPPYPAPQHPTSAPMPPLASFMVARGHAPYLSNRQPVALSRSRSSPAT TWNHPSQQRCFPASPSLAY  
HTRSGAGSSKQGCVASNTAAQPPWLFCLLQRI PGLLLRVLRGQATNGPQAVLQ RATMAGAGLLFGLGMLAKL  
PKRGNAAGDGHGRRAAPLHAGIVWMRSDLRVSDHEALSAAAQECSSLVPLYCFDPAEY GKDSSSFERTGPGRA  
RFTIESVVALRQELRALGSDLIVRVGRPDVLPCLAAQVGAQAVYCHSDVASEAQQVESRVHEALRCMGVQLK  
TFWGGSTLFHADDLPFARTAVPANYAHFSQALAQVPVRAPTPTPTLLQAMPAGCCINPGDVPTLTQLGLTKEA  
ELIPPSALLGPGRLRGGEALKHLRAFILDV KAAAGRQQEQQGAAMKKELPGSGGSGPNLQGMCI GPTFSC  
KISPWALALGCISPRTVYHEMRHQLGLLGS LGGLSKEGNVPTGLEHRALGSNWLMFELLWRDFFR FKSAPPALP  
G

>Dunaliella\_sal\_KAF5839248.1

MAAEGAKRRLIVWLRNDLRLTDNTLLHEAASLCSGATGQAKYDEVLPVYIFDPRS YAVLKTGDYKTGVYRALF  
VVQSVKDLKARLRQAIGSDLLVLVGKPEEVIQCLVRGCQSPQVLSSQEV TSEELKVEAALERALKPVGGRLTR  
LWSNTLYHMDDLQSPQGFLGARGIKGMPDGFTSFREKVERGSRVRQALPAPSKGSLPLPSSASQLQVPSSALL  
DRGQSGGAGDGGPSLQALLQADPSFESLPWAEGAAPQPPGTHPQAVLKFQGGETAALARLKYLLWSDLLSTY  
FDTRNGMLGGDYSTKFAPWLAAGCISPR TIYHEIKKYE AQRIANKSTYWVIFELIWRDFFRFFAAKHEDRIFY  
ESGTIGKKLPWVKDPSRYERWAQGTGLPLVDANMRELAATGVCNIVNVNHLH THLFASHRENAFMGRHPV

>Echeneis\_nauc\_\_XP\_029353429.1

MHTTCIHWFRKGLRLHDNPALKSALRDSKELYPVFILDPHLHDSTRVGINRWRFLIGSLKDLD CSLRKLNSRL  
FVVRGKPEEVLPELFDKWKVTKLTYEYDTEPYSLSRDQKVSALAKEHGV EVTYKISHTLYDIDRIIEENNGKA  
PLTYNRMQAVVKT LGAPKKVPAPTLD DDIKDVKTPCSDKHEKYGIPALEELSRDTAALGEDLFP GGEQEALRR  
LDEQMKRTGWVCTFEKPQTS PNLSPSTTVLSPYLTFGCLSARTFWWRLTEVYRGKKHSDPPVSLHGQLLWRE  
FFYTASVGIPNFNKMEGNPVCTQVDWDTNPEYLA AWAREARTGFPFIDAVMTQLRQEGWIHHLARH AVACFLTR  
GDLWISWEEGQKVFEELLLDGDWALNAGNWQWLSASTFFHQYFRVYSPVAFGKKT DKS GDYIKKYLP LLKKFP  
EQYIYEPWKAPRSIQQAAGCIVGKDYPHPVVQHEV I SKKNIQRMKSAYAKRSADPNESPSKKQGVKRKATS VV  
DMLIKKVRKSL

>Echeneis\_nauc\_\_XP\_029378125.1

MVVNSVHWFRKGLRLHDNPALQEALNGADTVRCVYILDPWFAGAA NVGINRWRFLLEALEDLDNSLKKLNSRL  
FVIRGQPTFVFPRLFKEWKVTRLTFEYDPEPYGKERDGA I IKMGQEFGVETIVRNSHTLYNLDRIIEMNNNSP  
PLTFKRFQTIVSRLELPRRPLLTITQQQMDECR TKIADNHDQLYSIPSLEELGFRTEGLPPAMWQGG ESEALD  
RLNKHLDKKVWVANLEHPRVNTCSLYASPTGLSPYLRF GCLSCRVLYYNLRELYMKLRKRCSPPLSLFGQLLW  
REFFYTAATNNPNFDRMEGNPICVQIPWDQNP EALAKWAEGR TGFPWIDAIMTQLRQEGWIHHLARH AVACFL  
TRGDLWISWESGMKVFEELLLDADWSVNAGSWMWLS CSAFFQQFFHCYCPVGFGRRTPSGDYIRRYIPILKD  
YPNRYIYEPWNAPEFVQKAANCVVGV DYPKPMINHAEGSR LNIERMKQVYQQLSHYRGLSLLASVPTIQEEAE  
PPMTDESQTSSGPDSPRPVDSEAAGSS TAPDSSSTVCASSATAPCSDLEHLLNSHQ TGIRCTPSHTQLCAAV  
TSTSASHQSCLAASPSPTPIQSPLSRSKTPPN SC TTLPSASPATTVAQTFPKR KSLARKVRRSQRRHGRQ  
SCTPACKEGERRVKEEQKDESGGEERMEQT VEMDEERMEEEESGEIATPQQ

>Echeneis\_nauc\_\_XP\_029378273.1

MGVNTIHWFRKGLRLHDNP SLRDSIRGADTLRCIYILDPWFAGSSNVGINRWRFL LHCLLEDLDASLRKLNSRL  
FVIRGQPTDVFPRLFKEWQINRLSYEYDSEPF GKERDAAIQKLANEAAVEVMVQISHTLYDLDKI IELNGGQP  
PLTYKRFQALINRMDAVELPAETITCEVIKKCATPIGDDHDDKFGVPSLEELGFETEGLT TAVWPGGETEALM  
RLERHLERKAWVANFERPRMNANSLLASPTGLSPYLRF GCLSCRLFYFKLS DLYRKVKKNSTPPLSLYGQLLW

REFFYTTATNNPCFDKMDGNPVCVQIPWDRNPEALAKWAEGRGTGFPWIDAIMSQLRQEGWIHHLARHAVACFL  
TRGDLWISWEEGMKVFEELLLDADWSVNAGSWMWLSCSSFFQQFFHCYCPVGFGRRTPNGDYIRRYLPILRA  
YPAKYIYDPWNAPEEVQKAAKCIIGVHYPKPMVNHAESRINIERMKQIYQQLSCYRGLGLLATVPANPTNGP  
SGSNVTGVNTGTSQGPSSSEEQYVQEGTSRTERGQVTQKRRREEAPSESSSSKSWRPSK

>Echeneis\_nauc\_\_XP\_029378353.1

MAPGAEDSKVLVSRLRLREVLEGREDEGEFFAVCVSVLGQQQTRSQFLSLIRPLSSADSPLHRVLTSVYQGYQ  
TEDNELELALALSISDMKDYQISAPSQESRLQQPKDSSNQISSVRLTPKSEARGGSHAQLAVAAGKRNTSSSQ  
SGAWGSVCPPKTAQETELQKGARADKHKETSGKGPTVCVFKPSASFSGLDMGQMTKDGDLELEKPKRPKNR  
RQRRKACGQQVIGLPSSLSAPRPILLWFRDLRLCDNPALIASLEVGAAPVIPVFIWSPEEEGPGITVAAGGA  
CKYWLHQALFCFCSSSLERIGSHLIFLKANAEGNAKGSSSLCALKDLIKETGARTVLANALYEPWLKERDEEVVS  
ALQKDGVECKLFHSYCLRDYPYSVSTVGVLGRGIGSVSHFMSCCRQNPGSALGVPLDPPASLPTPSQWPQGVSL  
DILGLACMPRRKDGTITIDWSANIRKSWDFSEEGAHAKLEAFLNDGVYRYEKESGRADAPNTSCLSPYLHFGQL  
SPRWLLWDAKGAHCRPPKFQORKLAWRDLAYWQLTLFPDLPWESLRPSYKALRWSSDRGHLKAWQRGQTGYPLV  
DAAMRQLWLTGWMNNYMRHVVASFLIAYLHLPWQEGYRWFQDTLVDADVAIDAMMWQNGGMCGLDHNFMVHP  
VDAAMTCDCPGTYVRKWCPELKDLNFIHKPWKCPTSMRLRAGLTLGQTYPHRVIDTLEERRSQSLQDVTLV  
RKKFGQYVDKHTGCDLVPLPSRLVSEALGLSHSNGGAVEAGKQFLLPVITRMEFKHQLEDPDADAGSNPYNVAV  
LKGYVSRKRDETIATFFNERDFTASVIYEAQRKERLESYRKMEGLPQPLALRGKARRTPAKDRFSIVPGGA  
VTSPW

>Echeneis\_nauc\_\_XP\_029380225.1

MLLHFCRSSTFSCALLKLVRHSDQRPTSLPPLFLKSVTSETIMSGRKRKASPGPDDEEAATAKQQKVTAKEKE  
RTEGWLQGLVKEQRSENKDMKFNKKRLRYISDREKIKQGSEGILYWMRLDRHVQDNWALIHAQRLALKENLPL  
HVCVFLVVPKSKLSTLRHYSFMLKGLEEVAKECEALDIQFHLRLGSPGELLSGFVSDHNVGAVVTDFSPREP  
MQWLEEIKTRLPEDIPLIQVDAHNIWPCWVASPKLEYAARTIRGKITKLLPEFLTDFPLVEKHPYATTITTKP  
VDWDKTLASLQVDRTVGEPEWAKPGTQGGMAMLETFFIDVRLKVFATQRNDPNASALSQLSPIRFGHISAQRV  
ALQVQCGGKSAGQSVSSFIEELVVRRELTDNFCFYNNKYDSVEGANDWAQKTLKDHAOKRPHYHYTCQOLEEA  
ETHDKLWNAAQYQMVKEGKMHGFLRMYWAKKILEWTSSPKEALSIALYLNDRYELDGQDPNGFVGCMMWSICGI  
HDQGWAERPIFGKIRYMNYKGCTRKFDVAQFERKYCPKKL

>Echeneis\_nauc\_\_XP\_029385143.1

MSASRTVICLLRNDLRLHDNELFWWAQRNAEHIVPLYCLDPRHYVGTYNYNLPKTGPFRLRFLLESIRDLRNT  
LLNKGSNLVVRRGKPEDVVAELIKQLGSVTTVAFFHEEVTSEELNVEKKVKDCAQMKVKVQTCWGCTLYHRDD  
LPFHHISSLPDVTYQFRKAVETQSRVRPAIPTPEQLKPLPPGLEGAIPTALDLEQPEPLTDPRSAPFCSSGE  
SQALARLKHYFWDTDVATYKETRNGLIGVDYSTKFAPWLAGCISPKYIYHQIKQYERERTANQSTYWVIFE  
LLWRDYFKFVSAKYGNRLFQVEGLQDKSVPWKKDMKLFDAWKDGRGTGVPFVDANMRELAMTGFISNRGRQNV  
SFLTKDLGLDWRMGAEWFEYLLIDHDVCSNYGNWLYSAGIGNDPRENKFNMIKQGLDYDSNGDYVRQWIPEL  
QGIRGADVHTPWTLSSTAALSHAQVSLGDTYPTPIVIAPEWSRHVNKKSGSTGSPKGGKGPSHTPRQHRDRGI  
DFYFSRSKNL

>Echinococcus\_gr\_KAH9284864.1\_photo-lyas

MPAKLSTEDFSKWVERININRVESCGKSVASYPFAACRVRLVSGTNEFKSVAETNLDDISGGVGSCRGCIYVW  
MSRDQRIQDNWALLFAQRIALKFSVPLHVCFNLVSSSALRTRRHASFLLEGLAEIEKECKDLEIGFHLLPVPV  
TKSKSGVKRSADGNVVHHGSDTGKAEPIVDVLKQLDARVVVTDFSPLRDDLRAVQFVSSHLSQDISLYQVDAH  
NVVPAWFASDKLEYSARTIRGKLHDKAKHLFTDFPPVIHHPIPSKWEAVDWKAIKQSLVGLVDESVEPVWAK  
GGAKAGLSQLFSFLHHLRAYATHRNDPTKKALSNSPWLHFGHISAQRCLWEVNLRRSLHKESTDAFMEEAF  
VRRELSDNFCYYPNYDSIKGAWSWAQETLRKHANDLRKPSYSEETMESATTEDDLWNAQRQLRREGKMHGF  
LRMYWAKKILEWHAEGPEKALQLGFRLDNRYSLDGTDPSTGYVGVMMWSICGVHDQGWKERPIFGKIRYMNFAGC  
KRKFDVAAFIRRYPRRMCTLYTLAHK

>Echinops\_telf\_\_XP\_004708484.1

MAAAVGTAALAATAPAPNKDGASSVHWFRKGLRLHDNPALLAAVRGARCVRVCYILDWPFAASSSVGINRWRF  
LLQSLADLDARLRTLHSLFVVRGQPADVFPRLFKEWGVTRLTFEYDSEPFGKERDAAIMKLAKEAGVEVVTE  
NSHTLYDLDRIIELNGQKPLTYKRFQAIISRMELPRKPAGAPTGLQMESQAEIPENHAETYGVPSLEELGF  
PTEGLGPAVWQGGETEALARLDKHLERKAWVASYERPRMNANSLASPTGLSPYLRFGCLSCRLFYRLWDL  
KKVKNRSTPPLSLFGQLLWREFFYTAATTNPRFDRMEGNPICIQIPWDRNPEALAKWAEKGTGFPWIDAIMTQ  
LRQEGWIHHLARHAVACFLTRGDLWVSWESGVRVFDLLEDADFSVNAGSWMWLSCSAFFQQFFHCYCPVGFG  
RRTDPSGDYIRRYLPKLKGFPESHYIYEPWNAPEVQKAAKCIIGVDYPRPIVNHAESSRLNIERMKQIYQQLS  
RYRGLCLLASVPSCVEDLSNPVAEPSVSQALSMSSTGPRLPTSRTSPKRKLEAAKAPPGEDLSKRARVAKAP  
RPEPPGKAV

>Echinops\_telf\_\_XP\_045148331.1

MGVNAVHWFRLRLHDNPALKECIQGADTIRCVYILDWPWFAGSSNVGINRWRFLLQCLEDLDANLRKLNSRL  
FVIRGQPADVFPRLFKEWDITKLSIEYDSEPFGKERDAAIKKLATEAGVEVIVRISHTLYDLDKIIELNGGQ  
PLTYKRFQTLISKMEPLEIPVETITSEVIEKCVTPLSDDHDEKYGVPSLEELGFDTDGLPSAVWPGGETEALT  
RLERHLERKAWVANFERPRMNANSLASPTGLSPYLRFGCLSCRLFYFKLTDLYKKVKKNSSPPLSLYGQLLW

REFFYTAATNNPRFDKMEGNPICVQIPWDKNPEALAKWAEGRGTGFPWIDAIMTQLRQEGWIHHLARHAVACFL  
TRGDLWISWEEGMKVFEELLLDADWSINAGSWMWLSCSSFFQQFFHCYCPVGFGRRTDPNGDYIRRYLPVLRG  
FPAKYIYDPWNAPEGIQKQAKCLIGVNYPKPMVNHAEEASRLNIERMKQIYQQLSRYRGLGLLASVPSNPNGNG  
GLMGYSPGENTTGCSSGGGCPPNGILHYAHGDSQQAALLKQGRSPLGTGLSSGKRPSQEEDTQSVGPKVQRQ  
SSN

>Echinostoma\_cap\_VDP70089.1\_unnamed\_pr

MLGGLKEVEQECSRSLNIPFHLINAADFLDSEEDPGLGVRIRWSPDYVPSQMAGSYLYDAAVARAICSLVNSL  
PTGCLVVDIFSPLRAPSAWVERVAASVPDRVPVCQTTYAVKVFKVQAASDVDAHNIVPVWCGSDKLESHARTIR  
PKLFSTKSKYLTEFPPIIAHPFRSEFDITRHPTIDWQTVLDRYCGDKSVKAVSWAIPGTRAAFEVLRSFIDER  
LKGFDSQRNNPANPALSGLSFWHFHQIAPQRAILEVSTVQKKYGRSVDIFIEEAFNRRELAENFCFYNPPLYD  
SLQGARQWAQETLTQHATDTRPASYTRDELESAKSGDDLWNAAQRQLVHTGKMHGFLRQYWAKKILEWCAEGP  
QTAIDWAIYLNDRFSLDGSDPNGYVGIMWAICGIHDQGNWERTIFGKVRTMTYNGCKKWFSIPAFVERFTEHN  
VTSK

>Ectocarpus\_sil\_CBJ30497.1\_cry\_1

MSSSKEPSSIIHWFRKGLRLHDNRALLEACNGTASLYPLFVLDSDPASPESRAGPLRTAFLLESQDLDEQLRA  
KGSRLFVVRGKPEEVLPLQLFEEWNVKKLTFEADSEPRSRARDREVGSLAKEAGVQVLIRGTSTLRNLQNYHML  
MGKKQGTLYKTYGAFLKLHDNAGVPDPCAPDISGDLPAFGASPDAAEYDRFSIPSLSDLGVEPLAKALKFRGG  
EREALARLERVMAREDWISKFEKPKTSPNSIEPSTTVLSMYISHGCLSTRRFWALCKVYTKKGGSKPPVSLK  
GQLLWKEFNYFSGYSIPSFDMVGNPVIRQIPWDKDEEKLMAWKEARTGFPWIDAAMTQLKDEGWIHHLARHA  
VACFLTRGDLWQSWEDGAADFDELLDADWSINNFWQWLSCSAFFYQYFRCYSPIAFGKKTQDNGDYIKKYL  
PALRKFPISKYIYEPWTAPLQVQRGCGCIIGKDYPKPIVDHADTSKANMAKMNDAYDAHQEAQAAESHDDGGSG  
SGGGGSGGGSGGGARSARGAQPASSKRVR

>Ectocarpus\_sil\_CBJ48325.1\_cry\_2

MMASMSAGGTAAGGSAAALKGAAGIVWFKYSDLRLEDHEPLALAHRESAQVAHVFCIDDRWFGQTRRGTSKM  
SAARCRFLLESVADLRARLRERGSDLLVRRGHPEDVIPALAAARLGGGSVAGVTLFAHTDVCSEEADVHA AVKS  
ALAAASSAGRGGGA AVAVKEAWGNTLHDVADLPFDPSGVPEIFTQFRKSVESKYSCKMRPPVPLPSFPRPVP  
TGTTQDDGEASAPGAIP TTEELGLGTAPERDARSVF PFNGGETAGLRVQSYIWDEDRLEKYKVTNRNLLGSG  
FSSKFS PWLALGCLSPRTIVKEIRKYETDRIANDSTYWLIFELLWRDFFRYS AVKNGNSIFHLGGPRRDTRGRQ  
RWLDDAGSLEAWKEGETGYPLIDANMRELKASGFMSNRGRQVVASFTRDLQMDWRLGAEHFEEYLLDHDPAS  
NWGNWNYVAGVGS DPREGRYFNIEKQAKTYDAEGAYMRHWLP ELAALPTTALQTPGGIT TMLRHMHA IPTSVY  
PDFIAPLKFSKAGGGRGGGRGGDGRGGGRGGGGGRGGGKRGGGGKGNNGSRKFKASRLQT

>Ectocarpus\_sil\_CBN78764.1\_conserved\_

MALLETPDWFKAEVRCLTDASVPRDQGNVWYMSRDQRAEDNWAMLYAKNLAQEGGVPLVVAFVLGAWQVT  
EPKTTLR YAGFMLKGLEETE GDLRKKKIPFHL LQAAEPRDVVP AF AKELGALAI VTD MCPLRDPTRRAREVAE  
ELNKS G DGTPLFQVDAHNVPVWATSDKQETMARTIRPKIHARPDFLGAIPELSPNPQGT KLPAATDWKAAQT  
SLDLDRSVPEISWLKPGAKGASDNLQSF IETRMKG FADLSNNPNEDVCSHMSPYFNLGQMSAQAAMVRVKASR  
RHPDGVKAFVEQGVVRRELSDNFCFYNDNYDNLSGAAGWARESLEAHANDQREWTYSVQELEEAKTHEDLWNA  
AQLQLVRDGKMHNF LRM YWAKKILEWSPSPHDALE RCLFFNDKYELDGRDPNGFTGCAWSVMGIHDMGWKERE  
VFGKIRYMNYAGCKRKFDVQEFVSKYAGAGEA AVAAGGT VAPAKRKPSAAKGRSSAAKKGKAVSGRKG

>Egretta\_garz\_\_KFP11678.1

RFL LQCLEDLDANLRKLNSRLFVIRGQPADVFPRLFKEWNI AKLSIEYDSEPF GKERDAAIKKLASEAGVEVI  
VRISHTLYDLDKIIELNGGQPPLTYKRFQTLISRM EPLEMPVETITPEVMEKCTTPVSDDHDEKYGVPSLEEL  
GFDTDGLPSAVWPGGETEALTRLERHLERKAWVANFERPRMNANSL LASPTGLSPYLRFGCLSCRLFYFKLTD  
LYKKVKKNSSPPLSLYGQLLWREFFYTAATNNPRFDKMEGNPICVQIPWDKNPEALAKWAEGRGTGFPWIDAIM  
TQLRQEGWIHHLARHAVACFLTRGDLWISWEEGMKVFEELLLDADWSVNAGSWMWLSCSSFFQQFFHCYCPVG  
FGRRTDPNGDYIRRYLPILRGFPAKYIYDPWNAPE SVQKAAKCIIGVNYPKPMVNHAEEASRLNIERMKQIYQQ  
LSRYRGLGLLATVP SNPNNGNGGLMGYSPGESISGCGSTGGAQLGTGDGHTVVQPCALGDSHTGGSGIQQQG  
YQQAASSILHYAHGDNQQSHLLQAGRTALGTGISAGKRPNPEEETQSVGPKVQRQSTN

>Egretta\_garz\_\_KFP13269.1

DNWAFLYAQRALAKQELPLHVCFC LVPKFLDATIRHYGFMLRGLQEVAEECAELDIPFHL LLLGYAKDVLPAFM  
VEHGVGLVTD FCLRLRPRQWVEDVRERLPEDVPFAQVDAHNIVPCWITSPKQEYSARTIRGKIHAQLPEFLT  
EFPPVVRHPYPSPCQAQPIAWEACYSS LQVDRTVKEVEWATPGTAAGLAVLQSFIAERLKSFGSHRNDPNKAA  
LSNLSPWFHFHGGVSTQRAILEVQKHRGKYKESVD AFVEEAVVRRELAENFCYYNDNYDSVQ GAYDWAQTTLKL  
HAKDKRPFLYKLQLEQGTTHDPLWNAAQLQMVREGKMHGFLRM YWAKKILEWTRSP EALQFAIYLNDRYEL  
DGRDPNGYVGKRLWSICGIHDQGWAERAVFGKIRYMNYAGCKRKFDVGQFERRYAP

>Egretta\_garz\_\_KFP23211.1

RFL LQSLEDLDNSLRKLNSRLFVVRGQPTDVFPRLFK EWGVTRLTFEYDSEPF GKERDAAIVKLAKEAGVEVV  
IENSHTLYDLDR IELNGHKPPLTYKRFQAIISRMELPKKPVSTVMSQQMESCKVDIQENHDDVYGVPSLEEL  
GFPTDGLAPAVWQGETEALARLDKHLERKAWVAN YERPRMNANSL LASPTGLSPYLRFGCLSCRLFYRYRLWE  
LYKKVKRNSTPPLSLYGQLLWLGVFYTAATNNPKFDRMEGNPICIQIPWDRNPEALAKWAEKG TGFPWIDAIM

TQLRQEGWIHHLARHAVACFLTRGDLWISWESGVRVFDLLELLDADFSVNAGSWMWLSCSAFFQQFFHCYCPVG  
FGRRTDPSGDYVKRYLPKLGKGFPSRYIYEPWNAPESVQKAAKCIIGVDYPKPMVNHAETSRLNIERMKQIYQQ  
LSRYRGLCLLASVPSCAEDLSGPVTDASAGQGCSTSTSTVRLSQADQASPKRKHEGAEELCAEELYKRAKVTC  
LPAPEIPGKS

>Egretta\_garz\_\_XP\_009632356.1

MPHRTIHLFRKGLRLHDNPILLAALESSEVVYPVYVLDKRFMTSMVHIGALRWHFLLQSLEDLQKNLCQLGSC  
LLVIQGEYESVLRDHIQKWKITQVTLDAMEPFYKEMEANIRRLGEELGFEVLSLVGHSLYDTRKRVLDLNGGT  
PPLTYKRFLHILSLLDGPEVPVRNLTAEDFQRCSPDPGLAEHYGVPLPVDLKI SPESLSPWRGGETEGLQRL  
EQHLTDQGWVASFTKPRITPNSLLPSTTGLSPYFSMGCLSVRTFFYRLSNIYAQAKHSLPPVSLQGQLLWRE  
FFYTVASATPNFTKMAGNPICLQISWYEDAERLHKWKTATQTFPWIIDAIMTQLRQEGWIHHLARHAVACFLTR  
GDLWISWEEGMKVFEELLLDADYSINAGNMMWLSASAFFHQYTRIFCPVRFGKRTDPEGQYIRKYLPLVKNFP  
SKYIYEPWTASDEEQKQAGCIIQDYPPFMVNHKEASDHNQLMKQVREEQSRTAQLTRDDADDPMEMKVKHG  
HAEENGSKGKVARMTQTEIPSGISPNGKRGEPEAS

>Egretta\_garz\_\_XP\_035753346.1

MQHSSIHWFRLRLHDNPALLAAATDCRRLHPLFILDPSRGRAGANAQRFLLDALQDLGSLREMGSRFLFV  
RGCPEEVFPRFLHAWGTTRLTFEVDTEPSTRQRDAAVAKLAAQHGVVIREVSHTLYDTQRVLALNDSKAPLT  
YKRLQSLAALGPPEKPAPALTQEHLLQGCRTPCQVSHDTPYKVTLEELGQDPAELGPHLYPGGETVALARLD  
TFMERTAWVCGFKKPEPTEPNLSPTTVLSPYIKFGCLSVRTFWWRLEDEVYQGRKHSQPPVSLHGLLWREFF  
YTAGASIPNFDPMVGNPVCLQVDWDDNPQHLRTWREGQTYPFIDAIMTQLRTEGWIIHHLARHAVACFLTRGD  
LWISWEEGLKVFEELLLDADWSLNAGNWLWLSGSAFFHQYFRIYSPIAFGKKTDRDGAYIRKYLPLKDFPAE  
YIYEPWKAPRAVQERAGCLVGTHTYPQPIVEHGAASKRNLERMKAARAQKGGKPPQMHRVPPAALPPPWLSSP  
PGTKREPPAGPSTAESQRKKPKNEQR

>Egretta\_garz\_\_XP\_035755535.1

DLRAHDNQVLHWAQGNADFVPLYCFDPRHYVGTHCYGFPKTGPHRLRFLLESVKDLRETLKKKGSTLVVRKG  
KPEDVVRDLITQLGSVSAAVAFHEEATQEELDVEKGLCQVCSQHGVKIQTTFWASTLYHRDDLPRPIARLPDVY  
THFRKAVESEAKVRPTVRMADQLKPLAPGVEEGCIPTMEDLGQKDPVTDPRTAFFPCSGGETQALMRLQYYFWD  
TNLVASYKETRNLVGM DYSTKFAPWLALGCISPRYIYEQIQKYEKERTANQSTYWVLFELLWRDYFRFVALK  
YGKRIFSLRGLQSKEVPWKDQLLLDCWKEGKTGVPFVDANMRELAATGFMSNRGRQNVASFLT KDGLDWRM  
GAEWFEYLLVDYDVCSNYGNWLYSAGIGNDPRENKRKNMIKQGLDYDNGDYVRLWVPELQGIKGADIHTPWA  
LNSAALSQAGVTLGETYPPQPVVTAPEWSRHLSQRPQGRSPHPRGRRGAHTPMQHKDRGIDFYFSRKKDAR

>Eimeria\_max\_\_XP\_013335797.1\_DNA\_photol

MSNLHWCLPDSGLPRGDGVLLTAGRLRASGTWLRGTVDSSRRVRCVTTPLTEPKSSGESVVCVLQRDRLRLQDNW  
ALLFAQDAALSLEKPLHLVHLVAPGCSFQRTTRHLQFHLQGVQELAVGLTSHNIPFHCFLLSAEASAAAAEA  
TDRLKRALQQLNPRLLVCDLMLPLRLPAAFVKELGFVCKEVMRCPLYQTD AHNVYAARTFRPRVMSLLEEF GCD  
FPQLRHPHTSSALQGGIANILQQQPQVDEAVQLPPQWVPGAAGGFAALKAFCSSQQLAAYPSRNNPLLNTQS  
GLSPWLHFGQIAAQRCLLAVRALGPATKIGAAAAAGRESFIEELVVRRELAENFTFYNGAYDKIEGAPRWAQE  
TLEAHRGDKREYVYSLAQFEAAKTHDVLWNAQLQLVHVGMHGFRLMYWAKKILEWSPSAQEALSAALHLND  
KFSLDGTDPNGIVGCMWSVAGVHDQGWAERPVGKIRYMNLSGCRKFPVDEFVQKVQASTRKLKVETHPKTR  
NKQKEPTARVNATLALQPSPNKSTKKEKRQ

>Electrophorus\_elec\_\_XP\_026872983.2

MVVHAVHWFRLRLHDNPALQEAAGADTARCVYVLDPWFAGAAKGVNRWRFLLESLEDLDASLRKLNSRL  
FVVQGPADVFPRFLFKEWNVTRLTFEYDSEPYGKDRDGAIIKMAQEFVGVETIVRHSHTLYNPDRVLEMNGGNP  
PLTFKRQFQALVNRLELPKKPLPTVTAEQLAGCRTQLADDHDERYSVPSLEELGFKNPGKGASVWKGGETEAL  
RLGKHLDRKAWVANFERPRIKAHSLFASATGLSPYLCFGCLSCRVFYHHLRELYLKLRRRSSPPPSLFGQLLW  
REFFYTAATNNPNFDRMEGNPICVQIPWDHNPEALAKWAEGRGTGFPWIDAIMTQLRQEGWVHHLARHAVACFL  
TRGDLWISWEEGVKVFEELLLDADWSVNAGSWMWLSCSSFFQQFFHCYCPVGFGRRIDPNGDYIRRYVPQLKD  
YPDRYVYEPWNAPEAVQRASGCVGVDPYKPMINHAESTRLNIERMKQVYQQLSHYRGLSLLASVPTIQEEAE  
PLLSDDSQAGSSALPTGSGCRSFVSLSTEGGDTPDSSRPARLTPVQRLQ

>Electrophorus\_elec\_\_XP\_026888640.2

MVTNTVHWFRLRLHDNP SLRDSIVEADTLRCIYILD PWFAGSSSVGINRWRFLQLCLEDLDANLRKLNSRL  
FVIRGQPTDVFPRLFKEWKITRLSYEYDSEPF GKERDAAIQKLAREAGVEVTVRISHTLYHLDKIIEMNGGQS  
PLTYKRFQTLISRMDAVETPAETITADIMGRCTTPI SDDHDDRFGVPSLEELGFDTEGLPSAVWPGGETEALT  
RLERHLERKAWVANFERPRMNANSLASPTGLSPYLRFGCLSCRIFYFKLTDLYRKVKNSAPPLSLYGQLLW  
REFFYTAATNNPRFDKMEGNPICVQMPWDRNPQALAKWAEGRGTGFPWIDAIMTQLRQEGWIHHLARHAVACFL  
TRGDLWVSWEEGVKVFEELLLDADWSVNAGSWMWLSCSSFFQQFFHCYCPVGFGRRTDPNGDYIRRYLPVLR  
FPAKYIYDPWNAPESVQKLAKCMIGVHYPKPMVNHAESRINIERMKQIYQQLSCYRGLGLLASVPSNSSCNG  
DGAGGGPGDSSQEVSGAAHLTPANPLEGMSAGILFSSHGDQQPGISGLPQTGGRVRSRQEPKSHQGGGSVPV  
KRHSEDPSSNGCKIQKRNTD

>Elephantulus\_edwa\_\_XP\_006896803.1

MATTVVTTATTGPLAPAPGTEGASSVHWFRKGLRLHDNPALLAAVRGARCVRVCVYILDPWFFAASSSVGINRWRF  
LLQSLLEDLDKSLRALNSRLFVVRGQPADVFPRLFKEWRVTRLTTFEYDSEPFQKERDAAIMKMAKEAGVEVVTE  
NSHTLYDLDRIIELNGQKPPITYKRFQAIISRMELPKKPVGSVTSQQMEGCRAEIQENHDETFGVPSLEELGF  
PTEGLGPAVWRGGETEALARLDKHLERKAWVANYERPRMNANSLASPTGLSPYLRFGCLSCRLFYRRLWDLY  
KKVKRNSTPPLSLFGQLLWREFFYTAATNNPRFDRMEGNPICIQIPWDRNPEALAKWAEKGTGFPWIDAIMTQ  
LRQEGWIHHLARHAVACFLTRGDLWVSWESGVRVDFEILLDADFSVNAGSMMWLSCSAFFQQFFHCYCPVGFG  
RRTDPSGDYIRRYLPKLKGFPSRYIYEPWNAPEISQKAAKCIIGVDYPRPIVNHAETSRLNIERMKQIYQQLS  
RYRGLCLLASVPSCVEDLSNPVTEPSSSQAVSVTSAGQRQLPSGPASPKRKLETAEEPPGEEVSKRARVAELS  
SPELPSNDV

>Elephantulus\_edwa\_\_XP\_006897613.1

MGVNAVHWFRKGLRLHDNPALKECIQGADTIRCVCYILDPWFAGSSNVGINRWRGFCVVIPIFRVVSNSRHPPA  
LSGSRNRKLADPLEWDITKLSIEYDSEPFQKERDAAIKKLATEAGVEVIVRISHTLYDLDRIIELNGGQPPIT  
YKRFQTLIRKMEPLEIPVETVTSEMVEKCTTPLSDDHDEKYGVPSLEELGFDTDGLPSAVWPGGETEALTRLE  
RHLEKAWVANFERPRMNANSLASPTGLSPYLRFGCLSCRLFYFKLTDLYKKVKKNSSPPLSLYQQLLWREF  
FYTAATNNPRFDKMEGNPICVQIPWDKNPEALAKWAEGRGTGFPWIDAIMTQLRQEGWIHHLARHAVACFLTRG  
DLWISWEEGMKVFEELLLDADWSINAGSMMWLSCSSFFQQFFHCYCPVGFGRRTPDNGDYIRRYLPVLRGFPA  
KYIYDPWNAPEGIQKQVAKCLIGVNYPKPMVNHAASRLNIERMKQIYQQLSRYRGLGLLASVPSNPNGNGGLM  
GYSPGENIPGCSSSGSCSQSGILHYAHGDSQQTHLLKQGRGSLGMGFSGGKRPSQEEEMQSIGPKVQRQSTN

>Elysia\_chl\_RUS74619.1\_EGW08\_0176

MFLSASGIFATQLSGNRLIGLCFTIPRAVFALKTLNWRKQTGVHKSFPLTSSISSVRIATKNSSVRKRPTVWQ  
TRPSAFFTSSIMGEDNPSSSEKKTEKSSSKKEKVVKKEEKVSKTKGKEEVKDEGPKTKSEKKERPARTVEKRKL  
EKHQEEEEATAKSKIEDQNGATEPAEDVGNTDNEEFINKINQRRIDVCEDVSKFKFNKKRVRISEEDFCED  
SNGVVYWMSRDQRVQDNWAFLYAQRLAMKLEVPLHVCFCCLVPKYLDATIRMYGFMKGGLAQVEKECRELNIPF  
HLLCGEASKSIPAFLEKNIGGVVTDIFSPLRVNVKVVDDLNALPADVPLCQVDAHNLVPCWEASPKLEYGAR  
TIRNKIHNQLGQFLTEFPPLVKHPPKMPQITDWWKADGSLKVDRTVLEVAWAKPGTQAGYKMLQSFCEKR  
LKHFATARNDPNKQALSNSLPWIHFQGISVQRCILTVRLYRSKSSDSVNAFIEEAVIRRELADNFCYYNKHVD  
SVKGAYDWAKSLALHKDDKRPYLYTRDELEESKTHDDLWNAAQYQLVSEGMHGFRLMYWAKKILEWTTTSPE  
EALAFAIYLNDRFSLDGRDPNGYVGCMMWSICGIHDQGWAEARAVFGKIRYMNYQGCKRKFDVPGFVLRYKKKKL  
EAKK

>Elysia\_chl\_RUS76899.1\_EGW08\_0153

MSQKCHRVIHWFRLKGLRLHDNPALIEACKDASELYPVFVLDPWFVTNSNVGANRWRFQAQTLDLDDKQLKLLK  
LRLFVVRGNPETELEKLCCKWKITKLTIEVDTEPYAVARDERVGKTMEDLGVSVIPCVSHTLYDVHSIVKING  
GKAPLTYQSFQTAASRLGPPPQALPAPTLDLPGCRNLASDAHGKEFEIPSLTELRVCESDLGPNLYPGGETE  
ALDRMERHLKKVNWICSFEKPKTEPNLLPSTTVLSPYLKFGCLSARLFYHKIINVYKGGKHSQPPVSLIGQV  
LWREFYYTVAAVTPNFDKMEGNPVCKQIPWQENADHLNAWKQGRGTGYPFIDAVMTQLRQEGWIHHLARHAVAC  
FLTRGDLWVSWEEGQKEFEKLLLDADWSLNAGNMMWLSASAFFHQYFRVYSPVAFGKKTDPNGDFIRKYIPVL  
KKFPAKFIFEPWKAPASMQQAAGCIIGKDYPKPIVDHDVVRQKNIQKMAAAYAKSKSSTSETNKNHGKELSSK  
KRQSDDVGDGSPSKKKKS

>Elysia\_chl\_RUS77009.1\_EGW08\_0152

MNSNTDNNSNSEQSSATPTSPSTSKKHALFWFRKGLRLHDNPALIAAIHGAATYRCVYILDPWFAGASQVGIS  
KWRFLLESLEDLDSSLRKLNSRLYVVRGQPADVLPRLFQEWSITTFEEDPEPYGKERDAAALSALAREFSIQ  
VIAKPSHTLYDPKNVIAANGNSPPLTYKRFQSIISTLPPPEKPCETLSALAITNGTTPVSHDHNDKYSVPSLD  
ELGFDIDSLVPATFRGGESEALSRLNRHLERKAWVASFERPKMSPQSLYPSGTGLSPYLRFGCLSPRTFYWKL  
TELYKRVKKGVEPPLALHGQLLWREFFYTVATNNPNFDRMVGNSICVQIPWEHNPEALAKWAEGMTGFPWIDA  
IMVQLRREGWIHHLARHAVACFLTRGDLWISWEEGMKVDFEILLDADWSVNAGMWMWLSCSAFFQQFFHCYCP  
VGFGKRADPSGDFVRHYLPVLKAMPTQYIYEPWTAPESVQKAAKCIYKDYPLPMVQHSVVSQINLERMRQVY  
KRLVLKSSARNRMFMGLPKMPKVDVILNKVMFLSSSSDEEVSQKHRRRPSKHINDC

>Elysia\_chl\_RUS80278.1\_EGW08\_0119

MQVTRTLSPKAMAMNAKYGICLFRNDLRIHDNEVLNVANQKSDFLIPLYCFDPRHYKGTYHFGFPKTGKYRAS  
FIIDSVDLRSIAIQLSGSKLIVRHGKPENVIQELIRNLNLKDVTVFLQEESMDEEKRVERAIQTKCNVAIESL  
WGHTLYHVEDLPFQPKHLPDVYTEFRKRVENRAVIRKCFPTPSSLKPLPPDIDEGKMPTLADLELSEPEKNAQ  
SAFFPPGGESSLQRLHDLWGTDVSSYKETRNGMIGSDYSTKFSTWLAHGCISPRKIYWEIKKYEKERTSN  
QSTYVWIFELIWRDYFRFVGLKFGNKLFPYGGIKGEDVWRWSDKEQFNWAKEGRTGVPYVDANMREMAATGFM  
SNRGRQNVASFLTDLKLDWRLGAEWFESELLLDHVDVCSNYGNWLYSAGLGNDPRENRKFNVVKQGLDYDADGD  
YVRLWVPELAAVKTGKVHCVWTLSPSVLQAAGVTGLGETYPRPIVTAPEWSRHVNRPGSSGGGRGKGASQSR  
GRGQGSSSHRGHGSNSQYPGQKRGIDFYFSGSS

>Elysia\_chl\_RUS86048.1\_EGW08\_0062

MDTESSVSGSSSCDNNKEHVTVHWFRHGLRLHDNPALLEGLKDCREFYPIFILDGHVAGVSTAAPFRMQFLF  
ETLTDLDNNLKQFGTRLYFLRGDPVEVFEHLFEEWGVTRLTFEQDPEPIWQDRDIKVKDLCQSRGVEECIEKVS  
HTLWDPHRIIEENGHPPLTFAAFNQVAEIVGLPDKPVPNPDPFGQIALPFIADHDQKYGIPSLSSLGVEPESEK

EQASPCCRYLGGETKALKLLLSRLENEKRAFALDLSLPNQLYPDLVGMPMSSLSPHLRFGSLSIRKLYWALRCS  
YAQIHPNSPIPASITSQVLVWREYFYCMSVNNPKYNCMEGNPICLKINWYNDEEKFKCWKEGRTGFPWIDACMR  
QLVQEGWIHHVCRHAVSCFLTRGDLWIDWQKGLEVFDRLYLLDADWSVCAGSWMWVSSSAFEKILQCPRCICPV  
RYGRMDPSGSYIRRYVPELKDMPMMYLCEPWKAPLKVQEEANCVIGVDYPAPMVDHKKAAQECCKMERIKN  
LCKGVPHVAPTNETEVL SYMWLGKNQDEGMQASLHSTCSHLSSISL

>Emiliana\_huxle\_XP\_005763851.1

GGIVYWMGRDQVRQDNWALLHAAELAEASHLPLSVVFCPLPPAAGSPSTGPGSTLREYGFMLKGLREVSTELA  
ALRVPFCLLHGGSPPELLSQFCAQHEVAVVVADYSPLREPRGWKEALIAARPATPVLEVDHNVVPVWVASDK  
REVGARTIRKKITEKL PQWLVDIPALPPRAAADPQPPAGLAAAAAMDWVALEAGLQLDRAVAETSPTHPSGA  
AAALAAVDAFCDERLKL FADKRNDPNIAACSDLSPYLHFGQLSAQRMALCVKQHAKARSDSVASFLEESIVRR  
ELSDNFCHYEPAYDSL DGAAGWARESLELHASDKREHVYSLEQLEGAQTHEDLWNAAQRLAARGKMHGFMFRM  
YWAKKILEWTASPAEALRIGLYLNDKYSIDGRDPNGYVGVGWSVMGVHDMGWAERAVFGKIRYMNYNCGCKRKF  
DVKQYVAEWSGKKAAGSTSAGAKSASAGRAKAGGKAMKQTTLGGGSTAAADDEPRAKAPPPKKPKLAIP I

>Emiliana\_hux\_XP\_005763563.1\_putative\_C

MRTRFVWVRNDLRLHDNPCLARILAHKGAEARRSRDASESFHVL PVFLFDPRQYRRTARGCDKTGPFRAKF  
LYDSVLDLRQQRLRGIGSDDL VAPRGEGDTHTTILCQEQVTSEELRVDRALRSALPAGSCQFKPVWGGSLSELP  
YRQDLSDL PDGFTPFPRNKAGRPVESRCEVRAPIKRPGNGDLPLPPADALAAAAPLSCTALPPLPEIGLSEAAL  
GEASRTLRRDAAPDPRGVMPFPGGEAAALARHYLAISLAAPWLKHYLWSDALATYFETRNGMLGADYSSKFA  
PWLAHGCLSPRQVAHECRRYEGARVQNKSTYWMGGPIGSHQSWRSDAQLLQRWKD GELGVPLVDANMRELKAT  
GFMSNRGRQNVASYLALDLQLDWREGAEHF EALLLDYDVCSNWGNWVSAAGLTGGRVNRFNIVKQSKDYDTDG  
AYVRHWLPELKDVP SQFVHEPWKMGRAEQERFGCRIGTHGDAASDYPNPPKISPLASYHGFRHDIMES

>Emiliana\_hux\_XP\_005767880.1\_putative\_C

MVAVVYWFRKALRLHDNPALIAAAEGASSLPVYCLDPKTC SRARGAWTNP NMRFLLES LADLDASLRKLNS  
RLIVLHGD PV EALPAACK EWSASRLAYELDYEQYSLRRDKAVRSQAEQAGLEV VTRVGHTLVDPEALLLLSRG  
APVTSYDKFRGLLAQELKARPVTTLPPPASLPPPGRTAAPHAIP SLEELGLEPMGDAAVIARGGEGAALRAME  
AHLRRRDWIASFEKPKTSPT EMLAGGPF DAGAGRSTTVLSPYLTFGCLSSRLLYERVA AVYAEAAPRHSQPPV  
SLHGQLLWREFYVCCMHATPNYR RMVGNPICRQISWGEDAALVAAWREGRTGYPWIDAAMTQLRREGWIHHLA  
RHAVACFLTRGDLWQSWETGA AVFEEYLLDADEA INFGNWMWLS CSCFFYQYFRCYSPVAF PQKYDKQ GAYVR  
HWLPQLARLP AKYIYEPWKAPIAVQKEAGCIIGVDY PKPIVDHQAAAAATAAAPASARPLLAPPPSPRRHPH  
DPRPHAPATRSAGGVQREYGEDGRGV RGPQGQGGRGARRRQWQAGCRGRQAGGGGWQAQARGERRRRKAEEA  
LLVTAHPRASPQGSASICALWVALRGE

>Emiliana\_hux\_XP\_005784167.1\_photolyase

IVWLRAGDMRLTDNPALHAAAESGNPVI PVFIQPPRCEE GGWPLAGAAAYWLHHS LVALQHSL SRLGS AVVVR  
RAADCGSSAAALAAALAAESGSR RVYYNASFEPWLVRDEALEQELASQGVRAKRCAGNVLYHPEDARP DERT  
AAHGFGSVGFFLA AVATLPPPPPLPPPRRLKPPAAWPHSLPLSELGYGRLPVRPDGTVEDWAAGIRRSWAVG  
EIGAQRAL EAFVSGGIQRFEGRERFRADQANTAAISPHLRFGELSARAVLHSVRERASAPTFLRLAWRDLAY  
WALWRFPHLPSRPF RPWF EAQAWSSDQPALEAWQAGATGFPLVDAAMAQLWATGWMPNYMRHV VAGFLVEFLN  
LDWRRFSLPVPRHGLRWF DYTLVDADTA INAYMWQNGGHS GMDQWNFMHPVFAAKSCDPEGDYVRRWLPQLA  
ALPVEYIHC PW EAPFALRAAAGVVLGGNYPKRILDDLEAARRASHAAVMAVR

>Engystomops\_pust\_\_KAG8563182.1

MSAAVSSCVFGHARECRVRSRWLQNILCNMERVMERTGLEAEVEAAMRQLLAGQVQADEFFCVLLSLLGEH  
RVRALLPNIIQSLSSSSPALHSRLMSIHSQYYLQGPTDPYDEELEIALALS LQEAS PCTAVPREDVCSRSMLS  
FAEAAKKT VKKL NPEQKSSVYSKNCKPNDTEPRGALSEG VVGCHISDRKKHNVELAYNGQPEPEDCVLHNYED  
VYP IESPATKPNKTKKNRRGRKRKNVPVPGSPVAMKPAIVWFRDLRLYDNPALIAALELGPVPIPVFLWSMS  
EETGHNFTLATGGATKFWLHHALYQLDQSI IQMYGSHIVLRVNSSCAEELVSLVLQSGAETVLVNALYEPWLK  
ERDDLIAEILERKRVTRFKCHSYCLYEPYSVSTEGVGLRGIGSVSHFVSCCKKNASAAIGT PLQAPS NLPLPS  
LWPGSVELDSLELAKMPRRKD GSEIDWAATIRKSWDFSEDGAYTCLGNFLEDGIKHYDKESGRADKPYTSHIS  
PYLHFGQISPRTVLHEANFTKKSVPKFLRKLAWRDLAYWLLVLF PDMHVEPVRPAYRSQRWSSDKRHLRAWQK  
GMTGYPLVDAAMRELWLTGWMCNYSRHVVASFLVAYLHLHWIHGYRWFQDTLVDADVAINAMMWQNGGMSGLD  
HWNFMHPVDAALTCDPNGSYVRQWCP ELAGLPDEYIHKPWKCAPSQLKRAGTSAVCIFFINLFSASSSV DQ

>Engystomops\_pust\_\_KAG8564697.1

MEAGTAAVSSVHWFRKGLRLHDNPALVAALRGARCVRCVYI LDPWF AASSSGGVNRWRFL LQSL EDLDSSLR  
KLGSRLFVVRGQPADVF PRLFKEWGVNRLTFEYDSEPF GKERDAAIMKLAKEVGVEVIVENSHTLYDLDKIIE  
LNGNSPPLTYKRFQAI ISRMELPRRPVPTITRQQMEYCRGEIKSTHDDTYGVPSLEELGFP CENQGVAVWPGG  
ETEALARLDRHLERKAWVANYERPRMNANSL LASPTGLSPYLRFGLSCRLFYRYRLRELYQKVKNSPPLSL  
FGQILWREFFYTAATNNPKFDQMEGNPICVQIPWDRNPEALAKWAEGKTGFPWIDA IMTQLRQEGWIHHLARH  
AVACFLTRGDLWNSWECGVKFVDEL LLDADFSVNAGSWMWLS CSAFFQQFFHCYCPVGFGRRTDPSGDYVRRY  
LPVLKGFPSRYIYEPWNAPESVQKEAKCIIGVHYPKPIVNHAEASRLNIERMKQTYQQLSRYRGLCILASVPS  
CAEDIGGPITDPTAAHHTSMEAAPKLSLCSPDSPKRKHEESAEGAFKKVRVQSI AEAEERRAKDF

>Engystomops\_pust\_\_KAG8568157.1

MPHRSIHWFRKGLRLHDNPALLAAMKDCEELHPIFILDPWFPRNMKVSVNRWRFLIEALKDLDENLKMINSRL  
FVVRGKPAEVFPQLFKKWKVTRLTFEVDTEPYSRQDAEVGRIATEHNVEVIQKVSNTLYDVDRVIAENNGKP  
PLTYVRLQTVLASIGPPKRPCSAPTENMKDCRTPWKGSYEEIYGIPTLEELGQDPTKLGPPLYPGGESEALR  
RLDLNMKRTAWVCNFKKPETEPNSLTPSTTVLSPYMKFGCLSTRTFYWRLAEIYHGKKHSSPPVSLHGQLLWR  
EFFYTAGAGIPNFNKMEGNSVCVQVDWDENKDYLEAWREARTGYPFIDAIMTQLRTEGWIHHLARHAVACFLT  
RGDLWISWEEGQKVFEELLLDADWSLNAGNWQWLSASAFFHQFFRVYSPVAFGKKTDKNGDYIKKYLPILKKF  
PPEYIYEPWKS PRSVQERAGCIIGKDYPKPIVEHETVSKHNIQRMKAAYARRSGTSGEQAPKSPSNKKGVKRK  
APSVADLFKKK

>Engystomops\_pust\_\_KAG8573280.1

MRMMAAPGRIVICLLRNDLRYHDNEVLLWAHRNADYIVPLYCFDPRHYVGTHYYNFPKTGPHRLKFLLESIKD  
LRNTLKKIGSNLLLRGHPENVIEDLIKQIGPVSAVALQEEATKEELDVEKSLKQVCTRHGKHYHTIWGSTLY  
HREDLPFRHISGLPDIYTQFRKAVEAQCKVRPTLQMPKELKPLPGGLEEGSVPTAEDFGEQDPLTDPRTAFFC  
SGGESQALQRLQHYFWDNTNLVASYKDTRNGLIGMDYSTKFAPWLALGCISPRYIFEQIRKYEKEQTANQSTYW  
VIFELLWRDYFRFVALKYGRRIFFLRGLQDKEVPWKDLKQFEAWKEGRTGVPFVDANMRELAMTGFMSSNRGR  
QNVASFLLTKDLGLDWRMGAEWFEYLLVDYDVCSNYGNWLYSAGIGNDPRENKRKNMIKQGLDYGNGDYIRLW  
VPQLQEIKGQDVHTPWALSNAALAHANVTLGDSYFPPIVMAPEWSRHVNQKPDSCAASSRRGRGPSHMPKQHK  
NRGIDFYFSRNKNV

>Engystomops\_pust\_\_KAG8579692.1

MGVNAVHWFRKGLRLHDNPALMECIQGADTVRCVYIILDPWFAGSSNVGINRWRFLLQCLEDLDANLRKLNLSRL  
FVIRGQPADVFPRFLFKWKISRLSIEYDSEFPFGKERDAAIKKLASEAGVEVIVRISHTLYDLDKIIELNNGQP  
PLTYKRFQTLISKMEPLETTPVETITGEVMEKCTTPVLDDHDEKYGVPSLEELGFDTEGLPSAVWPGGETEALT  
RLERHLERKAWVANFERPRMNANSLLASTTGLSPYLRFGCLSCRLFYFKLTDLYKKVKKNSSPPLSLYGQLLW  
REFFYTAATNNPRFDKMEGNPICVQIPWDRNPEALAKWAEGRTGFPWIDAIMTQLRQEGWIHHLARHAVACFL  
TRGDLWISWEEGMKVFEELLLDADWSVNAGSWMWLSCSSFFQQFFHCYCPVGFGRRTDPNGDYIRRYLPILKG  
FPPKYIYDPWNAPEGVQKVAKCIIGVNYPKPMVNHAEEASRLNIERMKQIYQQLSRYRGLGLLASVPSNPNGNG  
NGGLMSYSPGDSMPGCSNNGGPQIGGGEGNSASNSNNQGESHSAGGIQGYWQGSILHYNHGDSQQSYLIQD  
VGNRRVT

>Engystomops\_pust\_\_KAG8581634.1

MPKSKSESSGGEKSDTSQEDASKRKSITTAKRKSQENKGKSKIISDLSSSETSDSDAKKKMKQEKNDAAEASGS  
LSEAVKKSRLGAATSVSDFKFNKKRVRLVSPEADLKDDALGVVYWMSRDQRVEDNWAFLYAQRLALKQKLPLH  
VVFCLVPKFLEATIRHFGFMLKGLQEVAEDCKGLNIPFHLIGYAKDVLNPNFVKEHGIGGVVTDPSPLRVPMQ  
WVSDVCERLPKDVPLVQVDAHNIIVPCWVASNKQEYGARTIRRKIHDQLSQFLTEFPVTTHPYNSKLEAEPID  
WDKCYASLEVDRTVKEVEWAKPGAKAGMDMLHSFITERLKFFNADRNPNRQALSNLSPWFHFGQLSVQRAIL  
EVQKYRSKYKESVDGFVEEAVVRRELADNFCYYNKNYDKVEGAYDWAQNTLKDHAQDKRTHLYTLQOLENGKT  
HDPLWNAAQQLQMVHEGKMHGFLRMYWAKKILEWTSSPEEALRFTIYLNDRFELDGRDPNGYVGCWMSICGIHD  
QGWAERAVFGKIRYMNYQGCKRKFDVDQFERRYHPPKFFAG

>Engystomops\_pust\_\_KAG8589654.1

MHIHIAELKGFASSLHVWRTCTHSTEDLQELTTFTMPHRTIHFIRKGLRLHDNPTLAALESSDVIFPLYILD  
KNFITSNTNVGSNRWNFLQSIEDLHCNLQKLNCLFVIKGDYKQVLRDYVQKWNITQVTVDHEIEPYRDM  
ENITAMGQELGQFLSLVSHSTLYDIRRIITENGGRAPLTYKRFHLHLSRLGDPEPPSREITEEHFMKCTTPAD  
AFVTEEHRVPLPEDLDVPRSKSTNWIGGESQGLRRLQHLQKQGVWSQFKKPQTIPNSLLPSTTGLSPYFSVG  
CLSVRVFFQKLSTIYAQAKNHSLPPVSLQGQLLWREFFYTVASYTPNFTKMAGNPICLQIDWYKDEDKLNKWT  
KAQTGFPPWIDAIMTQLREEGWIIHHLARHAVACFLTRGDLWISWEEGMKVFEELLLDADYSINAGNMMWLSASA  
FFHHYTRIFCPVRFGKRTDPDGNIRKYLPLVKDFPAKYIYDPWTAPEDIQKQAKCIIGQDYPFPMVDHKVVS  
EHNLQLMKLVREQQHKATDLTQDAADDPMEMDIKEYFRKDKEPNSMENPNKKRRCAEDMNVEQVKTHELCKVK  
VC

>Eolophus\_rose\_\_NXD62675.1

RFLQSLLEDLNSLRKLNLSRLFVVRGQPTDVFPRLFKEWGVTTRLTFEYDSEFPFGKERDAAIKLAKEAGVEVV  
IENSHTLYDLDRIIELNGHKPPLTYKRFQAIISRMELPKKPVSTVISQQMETCKVDIQENHDDVYGVPSLEEL  
GFPTDGLAPAVWQGGETEALARLDKHLERKAWVANAYERPRMNANSLASPTGLSPYLRFGCLSCRLFYRLWE  
LYKKVKRNSTPPLSLYGQLLWREFFYTAATNNPKFDRMEGNPICIQIPWDRNPEALAKWAEKGTGFPWIDA  
TQLRQEGWIHHLARHAVACFLTRGDLWISWESGVRVFDLLEDADFSVNAGSWMWLSCSAFAFFQFFHCYCPVG  
FGRRTDPSGDYVKRYLPKLKGFPSRYIYEPWNAPEVQKAAKCIIGVDYKPMVNHAETSRLNIERMKQIYQQ  
LSRYRGLCLLASVPSCVEDLSGPVTDASAGQGCSTSTAVRLSQADQPSPKRKHEGAEEELCTEELFKRAKVTGL  
PAPEVPGKSL

>Eolophus\_rose\_\_NXD65032.1

KVDYDVCSNYGNWLYSAGVGNDRDNRKFNMVKQGLDYGNGDYVRLWVPQLQGIKGADIHTPWALSSAALSQ  
VGVTLGETYPQPIVTTPEWSRHISQRPVSTGKEISRHPRGRRGPAHLVPQHKDRGIDFYFSRKDA

>Eolophus\_rose\_\_NXD71355.1

DNWALLYAQRLALKQELPLYVCFCLVPKFLEATIRHYGFMLRGLQEVAEECAELNIAFHLLRGYAKDVLPAFV  
VEHGVGGLVTDIFSPLRLPWQWVQDVRERLPEDVPPFAQVDAHNIVPCWIASPKQEYSASTIRGKIHAQLPEFLT  
EFPPVVRHPYPSPCAEPIAWEACYSSLEVDRTVKEVEWATPGTAAGLAVLQSFICKRLKYFGSHRNNPNKAA  
LSNLSPWFHFGQVSTQRAILEVQKHQHKYKESVDMFVEEAVVRRELAENFCYYNENYDSVQGAYEWAQTTLKL  
HAKDERPFLYKLQELEQGTTHDPLWNAQLQMVREGKMHGFLRMYWAKKILEWTRSPEEALQFAIYLNDRYEL  
DGRDPNGYVGKGNADALSPHAGCLWSICGIHDHGWTERRAVFGKIRYMNYAGCKRKFDVGGQFECRYPPAL  
>Ephemera\_dan\_KAF4518708.1\_(6-4)-phot  
MSSSGTVIHWFRKGLRLHDNPALLSAIEKIDDKCFELRPIFILDWPWIVTKLRVGTNRWRFLQQSLQDLDSKLR  
AIGSRLYVLRGKPENVPFKIFKDWKVKRLTFELDTEPYARERDARIEKLAKAEAGVPVAQKVSHTLYDTERVIM  
TNMGKPPLTYQKMVSLAEQMGRPLLKPSAPESLPDECKVGAAGLPVNETDWPNTDVPSLEELGVDPAKLQPC  
YPGGETEALRRMEEHLAKKAWICKFEKPETSPPNSLKPSTTVLSPYIKFGCLSARTFYHGSASHSKPPVSLVGQ  
MWREFFYTVSAATPNFDRMQGNPICQIPWGSNPHTLKAWEQGTGFPIIDAVMRQLRQEGWIHHLARHVSAC  
FLTRGDLWISWEEGMKVFEELLDADWALNAGNMMWLSASAFFHQYFRVYSPIAFGKKTDKDGSIKRYVPEL  
AKYPAEYIYEPWKSSLSVQRAAGCIIGQDYPRPIVNHDEASKRNKSRMAEAYKKNKQNKTDGSSNAKKRGAG  
NDRGFAKKFKQ  
>Ephemera\_dan\_KAF4519522.1\_B566\_EDAN0  
MASPEKRVKVGDNKTSKPGSTSTSNVGDFIANIENEREKAASSILEFKFNKKRVRILSKASDVAVNASGIVYWM  
SRDQRVQDNWALLFAQKLAMKNKIALHVCFLLPKFLDATIRHFKFMLDGLVEVQTECSKLGQLQFHLLQGDAA  
SVLPSFVKTHKIGALVADFSPLRTHLDWTESVKKTLPSDVAHNLPVCWVASDKLEYGARTIRNKITSKLPEF  
LTQFPVVKHPYPASFKAEPIDWSELESSLEVDTSVGPVTWAAPGTQAGLAVLHEFCQKRLKNFGTKRNDPTI  
NVLSNLSPWFHFGQISVQRAILTVNFKFSKYAESVAAFVEESVVRRELSDNFCFYNPKYDSIDGTNAWAKTTL  
IQHKKDKRPYLYTQEELDSAHTHDDLWNSAQIQLVKEGKMHGFLRMYWAKKILEWTVSPEEALRIAIYLNDRY  
SLDGRDPNGYVGCMMWSICGIHDQGWAEREVFGKIRYMNYAGCKRKFDVSAFVARYGGKVHFNKSNGQOTLKVT  
KGKSK  
>Ephemera\_dan\_KAF4522540.1\_Chryptochr  
MAGMNKLPRISVLWFRHGLRLHDNPALLDAIKNSDEFYPIFIFDGESAGTRLVGYNRMRFLLLEALADLDRQLR  
AVGGQLYLLQGPSRLFLQRLWEERSLTKLCEQDCEPIWHARDAKVRATCIDRCIHCHNEHISHTLWDPKEVIR  
TNGGSPPLTYQLFLHTVSVIGDPPRPVADPDWSNVKFGKLPEIITQEFKMFACVPSPEHFGLTTPATSPVVRW  
VGGETQALKHLQERLQVEEAAMRGVILPNRASPDLLAPPTSQSAALRFGCLSVRREGWMHHVARNVAVACFLT  
RGALWQSWEHGLQHFLKHLIDADWSVCAGNMMWVSSSSFEQLLDCSQYVCPVNYGRRRYVPELRRYPVEYLYE  
PWKAPLETQQNAGCIIGEDYPERIVDHTKALKQNRKYMQLRDEMMEATPDHCCPSNEDEVLSFMQLPEACFE  
ELNMSQA  
>Ephemera\_dan\_KAF4523712.1\_cry\_2  
MNCVLNKDNTTSSNTVSEKHTVHWFRKGLRLHDNPSSLHEGLKDATSLRCVFILDPWFAGSSNVGINRWRFLLQ  
CLEDLDRSLRKLNSRLFVIRGQPADALPKLFKEWGTCTCLTFEEDPEPFGRVRDQNMIMTLCRELGSLVISRISH  
TLYDLEKILEKNGGKAPLTYQFQNVVASMDPPPEPEHTVDSFGDTNTPVSDDHDEKYGVPSLEELGFVVDGL  
LPPVWRGGESEALARLERHLERKAWVASFGRPKMTPOSLLASQTGLSPYMRFGCLSTRLFYYQLTDLYKKIKK  
TVPPLSLHGQLLWREFFYCAATKNPNFDMVGNPICVQIPWDKNPEALAKWANGQTGFPIIDAIMTQLREEGW  
IHHLARHAVACFLTTRGDLWISWEEGMKVFEELLLDADWSVNGGMMWMLSCSSFFQQFFHCYCPVRFGRKADPN  
GDFIRQVRRYLPVLKFKPTRYIHEPWNAPESVQKAAKCVIGKDYGMPMVNHAVASRINIERMKQVYQQLSKYH  
GAGLLETVPSSQMNGINLYENITLTNSSDTTVLYKSNVNRQSKQKRHH  
>Eptesicus\_fusc\_XP\_028005951.1  
MNVNAVHWFRLGLRLHDNPALKECIRGADTIRCVYILDPWFAGSSNVGINRWRFLLQCLEDLDSNLRKLNSRL  
FVIRGQPADVFPRLFKEWNITKLSIEYDSEPFGERDAAIKKLATEAGVEVIVQISHTLYDLDKIIELNGGQP  
PLTYKRFQTLISKMEPLEIPVETITLEVIEKCTTPLSDDHDEKYGVPSLEELGFDTDGLPSAVWPGGETEALT  
RLERHLERKAWVANFERPRMNANSLASPTGLSPYLRFGCLSCRLFYFKLTDLYKKVKNSSPPLSLYGQLLW  
REFFYTAATNNPRFDKMEGNPICVQIPWDKNPEALAKWAEGRGTGFPIIDAIMTQLHQEGWIHHLARHAVACFV  
TRGDLWISWEEGMKVFEELLLDADWSINAGSMMWMLSCSSFFQQFFHCYCPVGFGRADPNQDIIRRYLPVLRG  
FPAKYIYDPWNAPEGIQKVAKCLIGVNYPKPMVNHAESRLNIERMKQIYQQLSRYRGLGLLASVPSNPNGNG  
GLMGYSTGENIPGCSSSGRRSSMGTGLGSGKRPSQEEDTQSIGHKVQRQSTN  
>Eptesicus\_fusc\_XP\_028009374.1  
MAATAVTA AAAAAPAPAAGTEGASSVHWFRKGLRLHDNPALLAAVRGARCVRCVYILDPWFAASSSVGINRW  
FLLQSLLEDLDTSLRKLNSRLFVVRGQPADVFPRLFKEWGVTRLTFEYDSEPFGERDATIMKMAKEAGVEVVT  
ENSHTLYDLDRIIELNGQKPLTYKRFQAIISRMELPKKPVASLTHQMESCPAEIQENHDETYGVPSLEELG  
FPTGLGPAVWQGGETEALARLDKHLERKAWVANERPRMNANSLASPTGLSPYLRFGCLSCRLFYRYRLWDL  
YKKVKRNSTPPLSLFGQLLWREFFYTAATNNPRFDRMEGNPICVQIPWDRNPEALAKWAEGKTGFPIIDAIMT  
QLRQEGWIHHLARHAVACFLTTRGDLWISWESGVRFDELLLDADFSVNAGSMMWMLSCSAFFQQFFHCYCPVGF  
GRRTDPGSDYIRRYLPKLKGFPSTRYIYEPWNAPESIQAACCIIGVDYPRPIVNHAESTRNLNIERMKQIYQQL  
SRYRGLCLLASVPSMEDLSNPVAEPSSSRTGSMSSAAAALWLREQSLGARTATMAAESNRQKS  
>Equus\_asin\_XP\_014707833.1

MGVNAVHWFRKGLRLHDNPALKECIQGADTIRCVYILDPWFAGSSNVGINRWRFLQCLELDANLRKLNSRL  
FVIRGQPADVFPRLFKAWNITKLSIEYDSEPFQKERDAAIKKLATEAGVEVIVRISHTLYDLDKI IELNGGQP  
PLTYKRFQTLISKMEPLEIPVETITSEVIEKCTTPLSDDHDEKYGVPSLEELGFDTDGLPSAVWPGGETEALT  
RLERHLERKAWVANFERPRMNANSLASPAGLSPYLRFGCLSCRLFYFRLTDLYRKVKKNSSPPLSLYGQLLW  
REFFYTAATNNPRFDKMEGNPICVQIPWDKNPEALAKWAEGRGTGFPPWIDAIMTQLRQEGWIHHLARHAVACFL  
TRGDLWISWEEGMKVFEELLLDADWSINAGSWMWLSCSSFFQQFFHCYCPVGFGRRTDPNGDYIRRYLPVLRG  
FPAKYIYDPWNAPEGIQKVAKCLIGVNYPKPMVNHAEEASRLNIERMKQIYQQLSRYRGLGLLASVPSNPNGNG  
GLMGYSPGENIPGCSSSGSCSQSGSILHYAHGDSQQTHLLKQGRSSLGPGLSGKRPGEEDTQIGIPKVQRQ  
STT

>Equus\_asin\_\_XP\_014716667.2

MAAAAAAVTVAAPAAAAAGTEGASSVHWFRKGLRLHDNPALLAAVRGARCVRVCYILDPWFAASSSVGINR  
WRFLQSLLEDLDTSLRKLNSRLFVVRGQPADVFPRLFKEWGVTRLTFEYDSEPFQKERDAAIMKMAKEAGVEV  
VTENSHTLYDLDR I IELNGQKPPLTYKRFQAI ISRMELPRKPVGSVTSQQMESCRADIQENHDETYGVPSLEE  
LGFPTEGLGPAVWQGGEMEALARLDKHLERKAWVANYERPRMNAASLLASPTGLSPYLRFGCLSCRLFYFRLW  
DLYRKVKRNSTPPLSLFGQLLWREFFYTAATNNPRFDRMEGNPICIQIPWDRNPEALAKWAEAKTGFPWIDAI  
MTQLRQEGWIHHLARHAVACFLTRGDLWVSWESGVRVDFDELLLDADFSVNAGSWMWLSCSAFFQQFFHCYCPV  
GFGRRTDPNGDYIRRYLPKLKAFPSRYIYEPWNAPEAVQKAAKCIIGVDYPRPIVNAETSRLNIERMKQIYQ  
QLSRYRGLCLLASVPSYVEDLSNPVAEPSSSQAGSVSSAGPRPPSPGPASPKRKLEAAEPPGEELSKRARVA  
EPPSRAV

>Equus\_caba\_\_XP\_005606624.1

MGVNAVHWFRKGLRLHDNPALKECIQGADTIRCVYILDPWFAGSSNVGINRWRFLQCLELDANLRKLNSRL  
FVIRGQPADVFPRLFKAWNITKLSIEYDSEPFQKERDAAIKKLATEAGVEVIVRISHTLYDLDKI IELNGGQP  
PLTYKRFQTLISKMEPLEIPVETITSEVIEKCTTPLSDDHDEKYGVPSLEELGFDTDGLPSAVWPGGETEALT  
RLERHLERKAWVANFERPRMNANSLASPAGLSPYLRFGCLSCRLFYFRLTDLYRKVKKNSSPPLSLYGQLLW  
REFFYTAATNNPRFDKMEGNPICVQIPWDKNPEALAKWAEGRGTGFPPWIDAIMTQLRQEGWIHHLARHAVACFL  
TRGDLWISWEEGMKVFEELLLDADWSINAGSWMWLSCSSFFQQFFHCYCPVGFGRRTDPNGDYIRRYLPVLRG  
FPAKYIYDPWNAPEGIQKVAKCLIGVNYPKPMVNHAEEASRLNIERMKQIYQQLSRYRGLGLLASVPSNPNGNG  
GLMGYSPGENIPGCSSSGRRSSLGPGLSGKRPGEEDTQIGIPKVQRQSTT

>Equus\_caba\_\_XP\_023509705.1

MAAAAAVTAAAAAPAAAAAAGAEAGASSVHWFRKGLRLHDNPALLAAVRGARCVRVCYILDPWFAASSSVGIN  
RWRFLQSLLEDLDTSLRKLNSRLFVVRGQPADVFPRLFKEWGVTRLTFEYDSEPFQKERDAAIMKMAKEAGVE  
VVTENSHTLYDLDR I IELNGQKPPLTYKRFQAI ISRMELPRKPVGSVTSQQMESCRADIQENHDETYGVPSLE  
ELGFPTEGLGPAVWQGGETEALARLDKHLERKAWVANYERPRMNAASLLASPTGLSPYLRFGCLSCRLFYFRL  
WDLYRKVKRNSTPPLSLFGQLLWREFFYTAATNNPRFDRMEGNPICIQIPWDRNPEALAKWAEAKTGFPWIDA  
IMTQLRQEGWIHHLARHAVACFLTRGDLWVSWESGVRVDFDELLLDADFSVNAGSWMWLSCSAFFQQFFHCYCP  
VGFGRRTPSGDYIRRYLPKLKAFPSRYIYEPWNAPEAVQKAAKCIIGVDYPRPIVNAETSRLNIERMKQIY  
QQLSRYRGLCLLASVPSCVEDLSNPVAEPSSSQAGSVSSAGPRPPSPGPASPKRKLEAAEPPGEELSKRARV  
AEPPSRAV

>Erinaceus\_europaeus\_XP\_007519157.1\_PREDICTED:

MAAVAVTAAATAAAAGPGPVADGASSVHWFRKGLRLHDNPALLAAVRGARSVRVCYILDPWFAASSSVGINRW  
RFLQSLLEDLDTSLRKLNSRLFVVRGQPADVFPRLFKEWGVTRLTFEYDSEPFQKERDTAIMKMAKEAGVEV  
TENSHTLYDLDR I IELNGQKPPLTYKRFQAI ISRMELPRKPVGSVTSQQMESCRADIEQENHDETYGVPSLEE  
GFPTTEGLGPAVWQGGETEALARLDKHLERKAWVANYERPRMNANSLASPAGLSPYLRFGCLSCRLFYFRLW  
LYKKVKRNSTPPLSLFGQLLWREFFYTAATNNPRFDRMEGNPICIQIPWDRNPEALAKWAEAKTGFPWIDAI  
TQLRQEGWIHHLARHAVACFLTRGDLWVSWESGVRVDFDELLLDADFSVNAGSWMWLSCSAFFQQFFHCYCPV  
FGRRTDPNGDYIRRYLPKLKGFPSRYIYEPWNAPEAVQKAAKCIIGVDYPRPIVNAETSRLNIERMKQIYQ  
LSRYRGLCLLASVPSCVEDLSNPMAEPSSSQAGSASSAGPRSLTSGPASPKRKLEAAEPPGEELSKRARVAE  
LSIPEPPSKDV

>Erinaceus\_eur\_XP\_016040514.1\_cry-1

MGVNAVHWFRKGLRLHDNPALRECIQGADTVRCVYILDPWFAGSSNVGINRWRFLQCLELDANLRKLNSRL  
FVIRGQPADVFPRLFKAWNITKLSIEYDSEPFQKERDAAIKKLATEAGVEVIRISHTLYDLDRNTTSQHL  
LDAPVPLRMLPCGAGIWTQGLSHKTSALSSFDTDGLPSAVWPGGETEALTRLERHLERKAWVANFERPRMNA  
NSLLASPTGLSPYLRFGCLSCRLFYFKLTDLKYKKVKNSSPPLSLYGQLLWREFFYTAATNNPRFDKMEGNPI  
CVQIPWDKNPEALAKWAEGRGTGFPPWIDAIMTQLRQEGWIHHLARHAVACFLTRGDLWISWEEGMKVFEELLLD  
ADWSINAGSWMWLSCSSFFQQFFHCYCPVGFGRRTDPNGDYIRRYLPVLRGFPKAYIYDPWNAPEGIQKVAK  
CLIGVNYPKPMVNHAEEASRLNIERMKQIYQQLSRYRGLGLLASVPSNPNGNGGLMAYSPGENIPVCSSSGSCSQ  
GSGILHYAHGDSQQTHLLKQGRSSVGTGFSNGKRPSQEEDMQSPKVQRQCTN

>Erpetoichthys\_calabaricus\_XP\_028649658.1\_cryptochro

MVNSIHWFRKGLRLHDNPALLAALNGADTVRCVYILDPWFAGSTNVGNRWRFLLESLEDLDTSLRKLGSRL  
FVIRGQPADVFPRLFKAWNITRLTFEYDSEPFQKERDAAIKFAEELGVETTVKNSHTLYNLDR I IELNNNSP

PLTYKRFQGIISRLEPPKKPVASLTKEQMOKCTTDIPETPYECFRVPSLDELGFKTATLSPSIWKGGETEALL  
RLEKHLERKAWVASFERPRINVNSLIASPTGLSPYLRFGCLSCRTFYITLLELYKKVKGNRTPPLSLFGQLLW  
REFFYTAATNNPKFDRMEGNPICVQIPWDKNPKALAKWAEGQTGYPWIDAIMIQLKQEGWIHHLARHAVACFL  
TRGDLWISWECGMKVFDELILLDADFVSNAGSWMWLSCSAFFQQFFHCYCPVGFGRRTDPGSGNFIRHYIPKLKD  
FPNRYIYEPWNAPDTVQKAARCIIGIDYPKPMISHAEASRLNIERMKQIYQHLSHYKGLSLLASVPTVPEEID  
SLALEDCHKHSSMPGKVSPLGKRDRPPDLEIDEKCTDPKVSCSHLMKGNFEQ

>Erpetoichthys\_calabaricus\_XP\_028671785.1\_cryptochro

MVVNTVHWFRKGLRLHDNPSLWDSLKGADSVRCVYILDPWFAGSSNVGISRWRFLQLCLEDLDANLRKLNSRL  
FVIRGQPADVFPRLFKEWNIISRLSFEYDSEPFGKERDAAIKKLASEAGVEVIVRISHTLYDLDKIELNGGQP  
PLTYKRFQTLISRMEPLETTPVESITADVMGKCTTPVSDDHDEKFGVPSLEELGFDTTEGLPSAVWPGGETEALT  
RLERHLERKAWVANFERPRMNANSLASPTGLSPYLRFGCLSCRLFYFKLTDLYKKVKKNSSPPLSLYGQLLW  
REFFYTAATNNPRFDKMEGNPICVQIPWDKNPEALAKWAEGRTGFPWIDAIMTQLRQEGWIHHLARHAVACFL  
TRGDLWISWEEGMKVFEELLLDADWSVNAGSWMWLSCSSFFQQFFHCYCPVGFGRRTDPNGDYIRRYLPVLRG  
FPAKYIYDPWNAPEIQKAAKCVIGLHYPKPMVNHAEASRLNIERMKQIYQQLSCYRGLGLLASVPSNPNGNS  
SGGVMGLSTNEIIQGTHSSVGTVMGTGENQVGGGLTFQHGDSHPVLHHEGYGSEILLYSQRGSQQTESVILQP  
VGRGTAVSTLTTVKRPNPEETTQGIGRKVQRQSSN

>Erpetoichthys\_cal\_XP\_028650777.1\_photolyase

MSNSTTFRCCLOSCWKVQSLPPTTLYTFAAWLYCATSKIEMQRKSSTKYSVKQLKAKKSKLLEDDHDDYAC  
KRQKLPEVTGGGKRLSDAICISRRETASSVAEFKFNKKVRILSETEDIVDGS DGILYWMSRDQRVHDNWALL  
FAQRLALKQKQPLHVCFLVPRFLEATIRHFGFMLCGLQEVEKECTELDISFHLLIGYAKDVLPEFVKSNHIG  
AVVTDFSPLRVPLQWLQDVKDRLPEGIPFVQVDAHNI VPCWVVS DKQEYAARTIRKKIHDKLPEFLTEFPV  
LHPHCTKIKTKEVDWEKARASLEVDHTVKEVDWAKPGTLGGLAVLESFISERLKIYSSDRNDPNKEALS NLSP  
WFHFGQLAVQRAVLEVQKFRSKYRESVESFIEESVVRRELSDNFCFYNPRYDSL DGAFEWARKTLEDHTKDKR  
THLYSRAELEEGRTHDPLWNAALQMVHEGKMHGFLRM YWAKKILEWTHSPA EALEIS IYLNDRYELDGRDPN  
GYVGC MWSICGTHDQGWSERAVFGKIRYMNYAGCKRKFDV NQFEYRYNHKKFTP

>Erpetoichthys\_cal\_XP\_028659921.1

MCAARTVICLLRNDLRFNDNEILYWAQANA EYVVP LYCFDPRHYLGTHTFNF PKTGPFRLKFLLESVKDLRET  
MQKKGSNLVVRKGKPEEVIQELIQKLKFVTAVTFQDEV TMEEKVVEYGVKQVCSQLNIKVQTFWGSSLFHRDD  
LPFHHSIQLPDVFTYFRKAVESQGIVRPTFAMPSQMKPLPEGVEEGDIPSHETFGQICPLLDPRSAPFPCEGGE  
TKALERLMHYFWDKNLIATYKETRNLIGIDYSTKFAPW LALGCISPRYIYEQVKKYEKERMANQSTYWVIFE  
LLWRDYFRFVALKYGRRIFFPKGLQDKAVAWKKDGKLFDTWKEGKTGVPPFDANMRELALTGFMSNRGRQ NVA  
SFLTKDLGLDWRMGAEWFEYLLTDYDVCSNYGNWLYSAGIGNDPREN RKFNMIKQGLDYDGDGEYVRLWVPEL  
KEIKGGDIHTPWALSSASLSHFNVHLNETYPSPII VQPEWSRHTNQKPANSSGHRGRGGS HNLPKQHKKDRGI  
DFYFSGNKHSE

>Erpetoichthys\_cal\_XP\_028666189.1\_cry-1-like

MKHNSIHWFRKGLRLHDNPALLAALKDCAEMRPIFILD PWFPMKVMKGINRWRFLIESLKDLD CSLRKMNSRL  
FIVRGKPVEVFPRLFKWRVTRLTFEIDTEPYAQLRDSQVAE IAKEHGVVEVIRKVSNTLYDTERIILENNGKP  
PLTYVKLQDLLSRLGPPKKPAPSLKGEDLKG IHTPYTDYHDT EFGIPTLEELGLNPAATGPHLFP GGETEAI R  
RLGEYMQKSVWVCNFKKPETEPNSLTPSTTVLSPYVKFGCLSVRTFWWKIAEVYHGK KHSPPVSLHGQLLWR  
EFFYTAGVGIPNFDHMEGNSVCLQVDWDSNEEYLA AWREGRTGYPFIDAIMTQLRTEGWIHHLARHAVACFLT  
RGDLWISWEEGQKVFEELLDADWSLNAGNWQWLSA SAFFYQFYRIYSPIAFGKKT DKN GDYIRKYIPI LRKF  
PVDYIYEPWKAPRSIQERAGCIIGKDYPKPIVDHDTVSKKNIQMKMAAYTRRSATSSKSGENCLKGPKKRSL S  
MANVFTKKISQKTC

>Escherichia\_col\_WP\_001583322.1\_photolyase

MTTHLVWFRQDLRLHDNLALAAACRNSSARVLALYIATPRQWATHNMSPRQAE LINAQLNGLQIALAEKG IPL  
LFREVDDFVASVEIVKQVCAENSVTHLFYNYQYEVNERARDVEVERALRN VVCEGFDDSVILPPGAVMTGNHE  
MYKVFTPFKNWLKRLREGMPECVAAPKVRSSGSI EPS SITLNYPRQSFDTAHFPVEEKAAIAQLRQFCQNG  
AGEYEQQRDFFPAVEGTSRLSASLATGGLSPRQCLHRL LAEQPQALDGGAGSVWLSELIWREFYRHLMTYYPSL  
CKHCPFIATWDRVQWQSNPAHLQAWQEGKTGYPIVDAAMRQLNSTGWMHNRLRMISASFLVKDLLIDWREGER  
YFMSQLIDGDLAANNGGWQWAASTGTDAAPYFRIFNPTTQGEKFDR EGEFIRRWLPEL RDVPGKAVHEPWKWA  
QKAGVKLDYPQPIVDHKEARLRTLAA YEEARKGA

>Esox\_lucius\_XP\_010881675.1\_cryptochro

MVVNTIHWFRKGLRLHDNPSLKE SIRGADTLRCVYILDPWFAGSSNVGISRWRFLQLCLEDLDASLRKLNSRL  
FVIRGQPTDVFPRLFKEWQISRLSYEYDSEPFGKERDAAIRKLASEAGVEVT VKVSHTLYDLDKIELNGGQS  
PLTYKRFQTLISHMDLVEMPAETITAEVMRKCATPLSDDHDDKFGVPSLEELGFETEGLVTA VWP GGETEALT  
RLERHLERKAWVANFERPRMNANSLASPTGLSPYLRFGCLSCRLFYFKLTDLYRKVKRNGSPPLSLYGQLLW  
REFFYTTATNNPRFDKMEGNPVCVQIPWDRNPEALAKWAEGRTGFPWIDAIMTQLRQEGWIHHLARHAVACFL  
TRGDLWISWEEGMKVFEELLLDADWSVNAGSWMWLSCSSFFQQFFHCYCPVGFGRRTDPNGDYIRRYLPILKG  
LPAKYIYDPWNAPEGVQKAAKCEIGVHYPKPMVNHAEASCLNIERMKQIYQQLSCYRGLGLLATVPANSNNGG  
NSAGGIPVPVPGPSPEEIHNDGAVQAGRGQFAVKRRNEDLIPGVSSKARRQTSN

>Esox\_lucius\_XP\_019896110.1\_cryptochro

MVVNSVHWFRKGLRLHDNPALQEALNGADTVRCVYILDWPWFAGSANVGINRWRFLLESLEDLDSSLRKLNSRL  
FVVRGQPANVFPSPFLKEWSVTRLTFEYDSEPYGKERDGAIIKMAQEFVETIVRNSHTLYNLDRLIEMNSGSP  
PLTFKRFQALVNVLELPAKPLPTVTKEQMDSCRTKISGNHDQHYSVPSLEELGFKTQGLGPAVWKGGESEALE  
RLNKHLDRAKAWANFERPRVSMCSLMASPTGLSPYLRFGCLSCRVFYYNLRELYMKLRKHCSPPSLFLGQLLW  
REFFYTAGTNNPNFDRMEGNPICVQIPWDHNPEALAKWAEGRTGFPWIDAIMTQLRQEGWIHHLARHAVACFLT  
TRGDLWISWESGMRVFEELLLDADWSVNAGSWMWLSCSAFFQQFFHCYCPVGFGRRTDPSGDYIRRYIPKLKD  
YPDRIYIEPWAPESVQKAAHCIVGVDYPKPMINHAEGSRLNIERMKQVYQQLSHYRGLSLLASVPTIQEEAE  
PPLTDDSQASGSTCESPPHTSSAQPNLTGRGRPSDSPGAPKATQSKHQHTTAPREEQEPDQGEWDEQQHLAEP  
MDSQ

>Esox\_luc\_XP\_010900290.2\_photolyase

MHRSWWLLRTSHHVWVWCAAIESRIPYHNLNKLIGLSSINPRTNMPAEKRKAPSNNKMGNNAKKQLQVAKEGMGE  
SEEVNEHQNDLKFNNKMRFLSQTEKMKQSGSEGVVYWMNRDHRVQDNWALILAQQLALEGKVPLHICVCLVL  
PQNSKLATLRHVGFMLRGLLEENAKECRALDIQFHLLQGSAGEVLPGFVADWNLGAVVTDIFSPLREPLRWLEDV  
KKGIPLDIPFIQVDAHNVPVPCWVASDKQEYAARTIRTKINKLLPEFLTEMPVTGKHPHPAAQTAKPVDWAGLM  
SSLELDRTVEEVGWARPGTAAGLAMLESFIDQRLKNFATLRNNPNSSALSQSPWIRFGHLSAQRVVLRVKSC  
EKKARESVPFTFIEELVVRRELTDNFCFYNSNYDSVKGASDWAQKTLKDHAKDPRPYVYSQEQLKAQTHDKLW  
NAAQYQMVTEGKMHGFMRYWAKKILEWTSSPEEALSIAIYLNDRYELDGQDPNGFVGCMWSICGIHDQGWGE  
RPVFGKIRYMNYKGCTRKFDVAQFERKYCPKTA

>Esox\_luc\_XP\_028972045.1\_cry\_DASH\_X

MSTSRTIIYLLRNDRLHDNEVLHWTQRTADYVVPPLYCFDPRHHLGTANYNLPCTGPFRLRFLLDISIQDVRAS  
LLSRGSNLVVRGRPEEVVGDLIKQLGSVSAAVAFHEEVAPEDQKVERGVRDVCSQMVKVYTCWGSTLYHRDD  
LPFNHLSRLPDVYTQFRMAVESKGRVRPVLPTPGQLKPLPPGSGLDEGPIPSPEELAQTAVRDPRAFPFSG  
GESQALARLQHYFWDTDVATYKETRNGLIGPDYSTKFSAWLALGCISPRYIYQQIKKYESERTASQNTYWVI  
FELLWRDYFKFVGAKYGDRMFDIKGLQDKSIPWKTDMKLFNAWKEGRTGVFPFDANMRELALTGFMSNRGRQN  
VASFLTDLGLDWRMGAEFQYLLVDHDSVSNYGNWLYSAGIGNDPRENRKFNMIKQGLDYDNNGEYVRQWVP  
ELQGIRGGDVHTPWTLSSSSSLSHSQLTLEETYPSPIVMAPEWSRHVNRKLSGAGASARGRKGPSHTPKQHKDR  
GIDFYFSKSKNF

>Esox\_luc\_XP\_034149143.1\_cry\_circad

MAHTCIHWFRKGLRLHDNPALLAALQDCKEIPVFVLDPHSPVNVNNGINRWRFLIGALKDLDCSLRKLNSRL  
FVVRGKPEEVFPKLFQEWKVTRLTIEYDTEPFSLCRDKDVRLAAEEHGVFVIFKVSHTLYNIERIIEENNGKA  
PLTF SRLQTLVKSIGPPRRPVPAPTSQDMKDIKTPCPEQYEQIYGMPKLEQLDQDPERLTVELFPGGEQEALL  
RLDQHMERKEWVCGFEKPQTSNLSPTTVLSPYMTFGCLSARTFWWRLTDVYQGGKHSQPPVSLHGQLLWR  
EFFYTAGVGIPNFNKMEGNPACTQVDWDSNPEYLAAWTQARTGFPFIDAIMTQLRQEGWIHHLARHAVACFLT  
RGDLWISWEEGQKVFEELLLDGDWSLNAGNWQWLSASTFFHQYFRVYSPIAFGKKTDKNGDYIKKYLPLLKKF  
PAQYIIEPWKAPRSVQEAAGCIVGKDYPRPIVDHEVISKKNIQRMKGAYAKRSPHSSKESPPSSKEGKGRKAS  
SVLDMLMKKKKT

>Eudromia\_elegans\_NXA36424.1\_CRY2\_prote

CIYILDPWFAASSAVGINRWRFLQLSLEDLDNSLRKLSSRLFVVRGQPTDVFPRLFKEWGVTRLTFEYDSEPF  
GKERDAAIVKLAKAEGVEVVIENSHTLYDLDRILNGLHKPPLTYKRFQAIISRMELPKKPVSIVSQOMETC  
KVDIQENHDDMYGVPSLEELGFPTDGLAPAVWQGGETEALARLDKHLERKAWANYERPRMNANSLASPTGL  
SPYLRFGCLSCRLFYRLWELYKKVKRNSTPPLSLYQQLLWREFFYTAATNNPKFDRMEGNPICIQIPWDRNP  
EALAKWAEGKTGFPWIDAIMTQLRQEGWIHHLARHAVACFLTTRGDLWISWESGVRVFDLDDADFSVNAGSW  
MWLSCSAFFQQFFHCYCPVGFGRRTDPSGDYVKRYLPKLKGFPSRYIIEPWNAPEVQKAAKCIIGVDYPKPM  
VNHAETSRLNIERMKQIYQQLSRYRGLCLLASVPCVEDLSGQVADPAVGQSSSTSTVMRVPQTDQASPKRKHE  
GAEELCAEELYKRAKVGGLPAPFVPGKSL

>Eudromia\_ele\_NXA31107.1\_PHR\_lyase

DNWAFLYAQRALAKQELPLRVCFCLVPRFLDATIRHYGFMLRGLQEVAKECTELNIPFHVLLGYAKDVLPAFV  
VRHGVGLVTDFCPLRVPPQWVEDVRERLPEDVPFAQVDAHNIVPCWVTSPKQEYSAWTIRSKIHRQLPEFLT  
EFPPVIQHPYPPSTPAEPVAWEACDSSLQVDRTVKEVAWATPGTAAGLAVLQSFIAERLASFGSHRNDPNKAA  
LSNLSPPWFHFGQVSTQRAILEVQKHHGKHKSVDVFVEEAVVRELAENFCYNNKYNDSVQGAYNWAQTTLKL  
HAKDKRPFLYKQLQELEQGNTHDTLWNAAQLMVQEGKMHGFLRMYWAKKILEWTHSPEEALQFAIYLNDRYEL  
DGRDPNGYAPLRAGMLTLCVCPAGCLWSICGIHDHGWTERAVFGKIRYMNYAGCKRKFDVGQFERRYSRK

>Eudromia\_ele\_NXA35803.1\_CRYD

LLKVDYDVCSNNGWLYSAGVGNDRPRNRRFNMIKQGLDYDGSGDYVRLWVPELQELKGGDIHAPWALSSASL  
SRAGITLGETYPQPVVTAPEWSSHISHRPQGRGPHPKGRKGAHPPTQHQRGIDFYFSRKKHQ

>Eudromia\_ele\_NXA37922.1\_CRY1

RFLQLQLEDLDANLRKLNSRLFVIRGQPADVFPRLFKEWSIAKLSIEYDSEPFGERDAAIKKLATEAGVEVI  
VRISHTLYDLDKIELNGQPPLTYKRFQTLISRMELPEMPVETITPEVMEKCTTPVSDDHDEKYGVPSLEEL  
GFDTDGLPSAVWPGGETEALTRLERHLERKAWANFERPRMNANSLASPTGLSPYLRFGCLSCRLFYFKLTD

LYKKVKKNSSPPLSLYGQLLWREFFYTAATNNPRFDKMEGNPICVQIPWDKNPEALAKWAEGRGTGFPWIDAIM  
TQLRQEGWIHHLARHAVACFLTRGDLWISWEEGMKVFEELLLDADWSVNAGSWMWLSCSSFFQQFFHCYCPVG  
FGRRTDPNGDIYIRRYLPVLRGFPAKFIYDPWNAPESVQKAAKCVIGVNYPKPMVNHAEASRLNIERMKQIYQQ  
LSRYRGLGLLATVPSNPNGNGGGLMGYSPOGENISACSSSTGGAQLGTGDAHAAGVQCTCTLGDSHAGTSGIQQQ  
GYCQASSILHYAHGDNQQSHLLQTGRTSLSGTGISAGKRPNPEEETQSIGPKVQRQSTN

>Eudromia\_ele\_NXA43208.1\_cry1\_

MPHRTIHLFRKGLRLHDNPALLAALASSDTLYPVYILDRGFVASATTMGPLRWHFLLQCLEDLRASLLQRGSC  
LLLLQGEHERVLREHVSKWNITQVTLDAQVEPCYKEMEAKIRSLGQEMGFKVLSLTSHSTLYDVQRILDLNGGT  
PPLTYKRFLHVLSSLGDPEVPVRNPTAEDFQRCRPPDLCLAECCRVPLPADLNI PMESLSPWKGGETEGLQRL  
ERHLMNQGWVASFTKPRTPVNSLLPSTTGLSPYFSLGCLSVRTFFYRLSHIYAQSKHSLPPVSLQGQLLWRE  
FFYTVASATPNFTKMVGNPICLQINWREDAERLHKWKTAAQTGFPWIDAIMTQLRQEGWIHHLARHATAACFLTR  
GDLWISWEEGMKVFEEMLLDADYSINAGNWMWLSASAFFHRYTRIFCPVRFGKRTDPHGHYIRKYLPIILKNFP  
SKYIYEPWTASEEEQKEAGCIIIGQDYPFPMVNHKEVSDHNNLLMKRVREEQRRTAQLTRDDADDPMEMKLKRD  
HSEENVKKGKMAKTE

>Euphausia\_sup\_ANW48376.1\_cry\_1

MTNTGCVVHWFHRLHFDNPALLHGLKLVDNLIKFLAVFIDDGHCAGLKNTGYNRARFLSESLEDLDDTLKK  
YKSQLYCFQKGPEEIFRILHKEIGIRRLTFEQDCEAIWNERDKVVNKMCCQELNIDVVEEVAHTLWNPYDIIEL  
NGGTPPLTYEMFLQVSSTAGKPPKPCSRPQWEIVNFQEIINDQLALKLKMHPKVPTPEMFGVYREGGENMQYT  
GETSALKHLKERLLVEENAFRDGYILPNQVNADILGAPMSMSAALRFGCLSVRKFYWSVQNTYEKLYAGESPP  
TYSLTAQLIWREFFYCMSVNNPKFDQMKDNPICIQIPWYDNKEHLKAWTDGQTYGPFIDACMRQLKREGWLHH  
IGRTAVSCFLTRGDLWISWEEGLKVIFYKYLIDADWSVSAGNWMWVSSSAFERQLDCSTCICPVNYGRRVEPTG  
DYIRRFVPELSSIPLEYLFEPLAPLRVQEQNGCIIIGKDYPTRIVIHKNASKENRRMMQDISAKLEMATPHVC  
PSNNVETRFTFLRLPDQCQHNV

>Euphausia\_sup\_CAQ86665.1\_cry

MTRGGEKHVVHWFHRLHFDNPATLKGAGLKGATTFRGIFIIDPWFAGSSNVGINKWRFLQCLEDLDTTLRKL  
NGRLFVVRGQPAHVLPQLFKTWGTTCLTFEKDPEPFGKVRDANITHIAREMGIQVIKTSHTLYKLEKII SKN  
GGKLPPTYKTQFQNVSTMEPPPLPASPVTVRVDGDAFTPIDEDHDEKYGVPTLEELGFETENLAPSIWKGES  
EALARLEHHLERKAWVASFGRPKMTPQSLYPSRTGLSPYLRFGCLSAARFFAELNDLYRKIKKSPAPLSLHGQ  
LLWREFYYTAATNNPKFDHMEGNPICVQIPWDKNAEALAKWAHGRGTGFPWIDAIMSQLRKEGWIHNVARHAVA  
CFLTRGDLWVSWEEGMKVFEELLLDADWSVNAGSWMWLSCSSFFQQFFHCYCPVRYGRKADPNNGDIYRTYLPV  
LKNFPTKYIHEPWTAPENVQKQSKCVIGRDYPMMPVDHVQSQANLMRMKQVYQQLSHYRVTPPKITSLLKSC  
PPPLPVICDKSKNTKNNKNEITRESNYTQQMQPA

>Euplokamis\_dun\_AQX17844.1\_putative\_p

MNGLGESVGLHWFHRLHFDNRLALLKAIKTSSTLIPLYILDTKYLSPAYRGVNYQSWILDTLRCLNDELRAK  
GSRLFVVIGNPINVLLSVIEKFQVKSITWERDTEPYNKDIDDRLYDICRDEIDAHGFWGHTLYDPDYLLLELN  
EGAAPLTMTGFLNIIALAGPPLKPVAAPSTVPGPPTDIYCGDIFETIPTLSDLKSYGYNPLDKTTKFVAGEKE  
AFRRMEKFQARSRVATFDKPKTNPTSLEPDTTALSPYISRGSLSTRYFYSKLLEALGESTESTRPIKGSLE  
GQLYWREMAYLIGYSTPNFNQMVGNPVCKQIPWLEGKEAKMLLHKWEMGKTGYPAIDAAMNQLRIDGWLHHLG  
RHLVACFLTRGDLWVHWELGRDIFNRYLLDSDWSITNFSWHWLSCSAFFHQYFRCYGPSTFFKRTDQTAGAYVR  
KFVPILKNFPDNYIYEPWKAPIEVQEAAGCIIIGKDYPMPIVDHVESKRNMGMKRMAYLNAQLNLNFMY

>Euprymna\_sco\_AGJ94014.1\_cry-1

MDVKMKKKIÄVHWFHRRQRIHDNPALIDALKDCDEFYPIFIFDGKVAGTEICGYNRWRFLLENLKDLDLDDTFSQ  
FGGRLYCFHGGQVDIFKNMFEEWGVNYITAEDDEPIWKERDDSARELCEESGITCKFFTSTHTLYSPQDIISK  
NGGTPPLTLELFQLVISSLGDPMPRIPEPNLEGVNMPVPENFEKFALPNLSYFGIEPECEEQKKPINVFGGE  
KRALALLKARLEKEKLFFEQGSCLPNHQENPELLAKAISLSPYLRFGCVSIRKTYWGICDITYKQVCHKETPSE  
VICQLHWREYFYVMCVGNINFDRIEGNPICLKINWAKNDELKKEWFGQTGYPWIDAIMNQLRFEGWNHNVGR  
HAVSCFLTRGDLWISWEEGLKVFLKYQLDADWSVCAGNWMWVSSSAFEKALQCPTCYSPIMYGMRMDRNGEFV  
RTYLPVLKDMPLKYLFCPWKAPLGVQEKANCIIGKDYPEPICSHRDMSRENMAKMYKIKEELLKGHI PHCAPT  
CEMEVWKFWLPPIEHHEFAHNL

>Euprymna\_sco\_AGJ94015.1\_cry-2

MSGERKNVIHWFHRLHFDNPALKEALEGATTIRCVTYTLDPWFAGSSQVGINKWRFLNCLLEDLDASLRKL  
NSRLFVVRGQPADVFPQLSKEWNITTLSEEDPEPFGKDRDAAICTLVRDAGIEVIKTCHTVYDSKAILEKN  
GGRPPLTYNKFQKILEEMDLPPRPLETVTVGDFGDCRTPLSVDHDEKYGVPTLEELGFDTEGLGQSNFHGET  
EALARLDRHLERKAWVASFEKPKMTPQSLFPSHTALSPYLRFSCLSPRLFYWXNRTIXXDQKGRITPPLSLH  
GQLLWREFFYTAASNNPRFDQMVGNPVCVQIPWDINQEALAKWAEGMTGFPWIDAIMKQLRKEGWIHHLARHS  
VACFLTRGDLWISWEDGMKVFEELLLDADWSVNAGMWMWLSCSSFFQQFFHCYCPVGFGKRIDPNNGDFIRHYL  
PILKRFPKAYIYEPWNAPEVQKTAKCIIIGKDYVPMVNHSEVSRINMERMRQVYHRLTMRSTATIPKQIHSR  
EGQQYTKHSPMDVCFYGTSKHDKRYEQHFMLKSY

>Euroglyphus\_may\_OTF77403.1\_photolyase

MATLVLLQRDLRQFDNPALYNVRRRKPIIVVHVMEKRLGSTSKWWLCKSLRLFRQQLEEWISIPLLHLDDSAN  
FSDMIDYLNHDHIEIEQIYSNGLDFELPDNFVEIHESFLANLIFIPEDMTKEFKIFTPTFWKSIRKNCSPVKPLP  
NPDWCKKNHVNIEFDEYNELPMMADDRWNQMESYWEIGEKAQKRLELFVKTKLSDYDHGRDFFHKDGTSKL  
SPHLRFGEISVRQIYEKLNNKSNERFCSELGWREFAYHVYRNHGDMAKIPLNPKYCDFWPEYNDHLNNAWRNG  
QTGYPVIDAAMRDLSTTGWMHNRLRMLVASFLVKNLLIPWQIGEEWFYDHLVDADPAVNPFWSQWVAGCGTDS  
VPYFRIFNPMLQGEKFDPPQGIYVRKWLPEFADFPMKRNIHQDI IKQPNLRPENYPQPIIDFKSSRERTLSTYK  
AIVAAKVIQLKKPRLP

>Euryarchaeota\_arc\_MBF56040.1\_photolyase

MWFRQDLRISDNPALLEAVSSGEIPIYIILDDINSQSEKIGDASRVWLHYSLLELNRSNLNGNLRFFFKGAAKEI  
ISELIRETDSKKIVWNRCYEPWRIKRDYIKKDLKESGIEVKSCNGSLLWEPQEICKSDGTHYRVFTPFYRRG  
CLNAVPPRIPQNTPLNIKFAEILNLKRDCSLEEELELLPKHNWYISMVKNWKIGEQQGLDDLDLDFLKNQIVNYK  
MGRNIPAKKSVSRLSPRLHFGELSPNQVWYAAQQIIEPGDSNLDSFLSELGWREFAYHLHFHYPSLANENLNP  
KFNSFAWKTTETNNIEAWQTGMTGYPIVDAGMRELYQTGYMHNRLRMIVGSFLVKNLLQHHWHGRDWFHNCCLVD  
ADLCVNSASWQWIAGCGADAAPYFRIFNPITQGEKFDPEGEYTKKWPELINIPKKFLFCPWQAPAEILEKSG  
IQLGTTYPMPIVDLKVSRNLALAEAFSKLPKTA

>Euryarchaeota\_arc\_MBF60325.1\_CMA66\_0727

MKLAVVWFRNALRIHDNPVLSWAYESENADFILPIYIFEEIEQQKSTQNMGEQRLRFQFDCVENLHQNLKKNKL  
DLDLHVFSGDCLEVLSESIREQLQPFVILLKEYSTNPRDRKQSELIGKKLINTNPTWSIKSFPSTQTILDIEA  
IVGSPGYKPPKSMKDMVRLFKIEFGDYENIIFETNDPNPSSNERKQDVSVNSKYQVSLDKIRSSLSTAGYFRG  
GENEAITRLEKKVISQNDYVNSFNPKPSISTNIQGNPMEPTTGLSPYISTGCLSIRRLWNSCSEIQQSGET  
VPPVSIQGGQIMFREMFIYLLSRSDNWDQDSGNPQCKEIEWGELNHALLDSWDSGQTGFPLIDAMMRQLNATGW  
MHHLGRHAVSCFLTRGQLWQNWTHGRDIFERKLIDSDWALNNGNWLWLAGVAPFSMPYYRIYNPCPDSKSSLN  
VETKDAEFIRYWPELAEFSPKYIFEPHLAPLHIQESAGCLIGTDYPNPIIDRKESRKKNLQSFKHSLEKLR

>Eurydice\_pul\_AGV28717.1\_cry\_2

MKMTGTNGSGKAKPKNVVHFRKGLRIHDNPALRLGLRNCTTFRCIFILDPWFAGSSNVGVNRWRFLQSLLED  
LDRSLRTFNSRLFVIRGQPAKALPELFKEWDTTILTFEEDPEPFGKARDANVAMAKEMGIKIVIRTSHTLYK  
LDRIIETNGGKPLTYKSFQNILSHIGPPSKPDSPVNREEINGGITPVSDHDDKFGVPSLEDLGFDTDHLPN  
PVWKGGETEALTRLEHHLERKAWVASFGRPKMTPQSLYASPTGLSPYLRFGCLSPRQFYVKLNELFQKIKKLP  
PPLSIHQQLLWREFYYCAATNPNPKFDHMEGNPICVQIPWDKNPEALAKWANGQTGYPWIDAIMTQLRQEGWVH  
NVARHAVACFLTRGDLWVSWEEGMKVFDEPLLDADWAVNAGSMMWLSCSSFFQFFHCYCPVRYGRKADPNGD  
YIRTYLPVLKNFPSRYIHEPWTAPEGVQRAAKCIIGIDYPMMPVDHSHKQSQHNIERMKQVYQQLTHYRGTAAP  
FSKSMKNRNHINIEFPPPRFEFEKPFPPKKDKREVKTAVD

>Eurydice\_pul\_AGV28718.1\_6-4\_photol

MSVICWFRKGLRLHDNPALTAIDQGMELFPVFLDPWFVANARVGNRWRFLHESLTDLDNSLKAIGSRFLFI  
LKKGPEEALVKYYSKFVDKAITWEYDSEPYSKERDQRIEIESESCKGVKVIKKGHTLYEAERIFKANGNKVPL  
TYQAMQKSMNSNLGAPPKPKPAPSQLP SHCEPKNKALMTSTKFNIPSLLEDLNDVSELLPLYPGGESEALKRM  
KKCLSKKQWICNFEKPKTSPNSLEPSTTVLSPYLKFGCLSSRLFYELAKVYEGNKHSQPPVSLHGQLLWREF  
FYAVGALSPNFDMEGNPICQIPWSNDQKLLAEWKHVRLQGRGTGYPFIDALMTQLKREGWIIHHLGRHAVACF  
LTRGDLWQSWEEGMKVFEELLDADWLSNAGNMMWLSASAFFHQYFRVYSPVAFGKSTDPDGDYIRKYIPALS  
KFPTKYIYEPWKAPLSQKAAGCIIGQDYPRPIVDHDIARKKNLQKMSNAYKADKEKRGADDTSNKAKKKK

>Eurypyga\_heli\_KFW12078.1

DNWAFLYAQRLLALKQELPLHVCFLVPKFLDATIRHYDFMLRGLQEVAEECAELNIPFHLLLGAKDVLPAFV  
VEHGVGGLVTDFCPLRLPRQWVEAVREGLPEDVPFAQVDAHNIIVPCWVASPKQEYSARTIRGKIHTQLPEFLT  
EFPFVIHHYPSPSCPAEPIAWEACYSSLEVDHTVKEVEWATPGTAAGLAVLQSFITERLGSFGSHRNDPNKAA  
LSNLSPWFHFGQVSTQRAILEVQKLKGKYKESVDAFVEEAVVRRELAENFCYNNENYDSVQGAYDWAQTTLKL  
HAKDKRPFLYKLQELEQGTTHDPLWNAQLQMVREGKMHGFLRMYWAKKILEWTRSPPEALRFAIYLNDRYEL  
DGRDPNGYVGKRLWSICGIHDQGWAERAI FGKIRYMNAYGCKRKFVDVGQFERRYAP

>Eurypyga\_heli\_XP\_010145866.1

MPHRTIHLFRKGLRLHDNPNTLLAALESSGVVYPVYIILDREFMTSAMHMGALRWHFLLQCLEDLQKNLCQLGSC  
LLVIQGEYESVLRDHDVQKWNITQVTLD AEVEPFYKEMEANIRHLGEELGFEVLSVSHSLYDTRKRIIDLNGGT  
PPLTYKRFLHILSLLDGDEVPVRTLTAEDFRSCRPPDPGLAERCVRPLAADLKILPESTSPWRGGETEGLQRL  
EQHLTQGWVASFTKPTIPNSLLPSTTGLSPYFSLGCLSVRTFFYRLSNIYAQAKHHSLLPPVSLQGQLLWRE  
FFYTASATPNFTKMAGNPICLQIGWYEDAERLHKWKTAQTGFPPWIDAIMTQLRLEGWIIHHLARHAVACFLTR  
GDLWISWEEGMKVFEELLDADYSINAGNMMWLSASAFFHQYTRIFCPVRFGKRTDPEGQYIRKYLPLKNFP  
SKYIYEPWTASDEEQAQAGCIIGRDYPPFMVNHKEASDRNLQLMKQVREEQCGTAQLTR

>Eurypyga\_heli\_XP\_010146875.1

MQHSSIIHWFRKGLRLHDSFNAQRFLLDALRDLDGNLQELGSRLFVVRGCPPEVFPRLFHAWGTTTLTTFEVDTE  
PPARRRDAVAELAARHGVEVIQEVSHSTLYDTERVLALNDGKAPLTYKRLQSLALLGPPEKPAPALTQEHRL  
GCCPPCQASHDADYGVPTLEELGQDPTEVGPHLYPGGETAALARLDTLMKRTTRGCSFKKPETLCRQREHSQP  
PISLHGQLLWREFFYTAGSSIPNFDPMVGNPICLQVDWENNPEHLRAWREGRTGYPFIDAIMTQLRTEGWIIH

LARHAVACFLTRGDLWVSWEGLKVFEELLLDADWSLNAGNWLWLSSSAFFHRYFHVYSPVAFGKKTDRDGAY  
IRKYLPIKDFPAEYIYEPWRAPRAVQERAGCLVGTHYPQPIVEHGVASKRNLGRMKAHARKGNRFPKKYPG  
PPTAQPSQPLSPPPPGIKREPEASPAAAKSQRKKPKQR  
>Eurypyga\_heli\_\_XP\_010147964.1  
VLHWAQSNADFVIPLYCFDPRHYLGTHCYGFPKTGPHRLRFLLESVKDLRETLKKKGSTLVVRKGKPEDVVRE  
LITQLGSVSAVAFHEEATQEELDVEKGLCQVCSQHGVKIQTLWASTLYHRDDLPRFPIARLPDVYTHFRKAVE  
SAAKVRPMLRMADQLKPLALGVEEGCIPTMEDFGQKDPVTDPRTAFCPSGGETQALMRLQYYFWETNLVASYK  
ETRNLVGM DYSTKFAPWLALGCISPRYIYEEIQRYEKERTANASTYWVLFELLWRDYFRFVALKYGKRIFSL  
RGLQSKDIPWKKDLQLFDCWKEGKTGVPFVDANMRELAATGFMSNRGRQNVASFLT KDGLDWRMGAEWFEYL  
LVDYDVCSNYGNWLYSAGVGNDPRDNRKFNMIKQGLDYDGN  
>Eurypyga\_heli\_\_XP\_010154061.1  
IIELNGHKPPLTYKRFQAIISRMEPKKPVSTIISQQMETCKVDIQENHDDVYGVPSLEELGFPTDGLAPAVW  
QGGETEALARLDKHLERKAWVANYERPRMNANSLLASPTGLSPYLRFGCLSCRLFYRLWEYKKVKRNSTPP  
LSLYGQLLWRGVFFTPATNTFDRMEGNPICIQIPWDRNPEALAKWAEKGTFGPWIDAIMTQLRQEGWIHHLAR  
HAVACFLTRGDLWISWESGVRVFEDELLDADFSVNAGSWMWLSCSAFFQQFFHCYCPVGFGRRTDPSGDYVKR  
YLPKLKGFPSRYIYEPWNAPESVQKAACCIIGVDYPKPMVNHAETSRLNIERMKQIYQQLSRYRGLCLLASVP  
SCVEDLSGPVADSASGQGCSSSTTARLSQADQASPKRKHEGAEELCAEELYKRAKVTGLPAPETPGKSL  
>Eurypyga\_heli\_\_XP\_010159206.1  
FLLQCLEDLDANLRKLNSRLFVIRGQPADVFPRLFKEWNI AKLSIEYDSEPFGERDAAIKKLASEAGVEVIV  
RISHTLYDLDKIIELNGGQPPLTYKRFQTLISRMEPLEMPVETITPEVMEKCTTPVSDDHDEKYGVPSLEELG  
FDTDGLPSAVWPGGETEALTRLERHLERKAWVANFERPRMNANSLLASPTGLSPYLRFGCLSCRLFYFKLTDL  
YKKVKKNSSPPLSLY GQLLWREFFYTAATNNPRFDKMEGNPICVQIPWDKNPEALAKWAEGRGTGFPWIDAIMT  
QLRQEGWIHHLARHAVACFLTRGDLWISWEEGMKVFEELLLDADWSVNAGSWMWLSCSSFFQQFFHCYCPVGF  
GRRTDPNGDYIRRYLPVLRGFPKYIYDPWNAPESIQAACCIIGVNYPKPMVNHAEASRLNIERMKQIYQQ  
LSRYRGLGLLATVPSNPNGNGGGLMSYSPGESISGCGSTGGAQLGTGDGHTVVQPCALGDSHTGASGIQQQGY  
CQASSILHYAHGDNQQSHLLQAGRTALGTGISAGKRPNPEEETQSVGPKVQRQSTN  
>Eurytemora\_aff\_XP\_023320251.1\_photolyase  
MASSSKAKLDGISGLMEERVELASSVSEFKFNKKRVRVLQGVGDGMKRECKSVMYWMWRDRRVQDNWALLY  
SQKIALELNVPQLVLCVPQSLGELTLRHYTFMLEGLKEVAEECKELNIGFSLALGEPDIITKSYLTKHKIG  
LLVVDYSPLRYHKAWLDCIQEKIDTPIHQVDAHNIVPVWITS DKQEYAARTIRPKITKNLAEYLTGFPVIEH  
PVDSISEISGLDFDEVYKGLKIDRTGWGVEPVKTFPTPGTRAGLCNLEEFCAKRIKEYGAKRNDPNVSALS  
NLS PWVNNQQISMQRAVIYVKKHGKSQSESVASFVEEGVVRRELSDNFCEYNPDYDTLKGASDWAKKSLNEHKKDK  
REYIYTREEFEEGRTHDDLWNAQLQLVREGKLHGFLRMYWAKKVLEWTESPESALVEALRLNDRYAVDGN  
NDP NGYVGMWSITGIHDQGAERAVFGKIRFMNYAGCKRKF DINKFIIKYGAKVHKKK  
>Eurytemora\_aff\_XP\_023327943.1\_cry-1-like  
MSKVEPGGKGFP EQGRPESKPTLKKTP EGLVRMRAQAEKDVINILWFRNGLRLHDNGSLHNATEDKTAKLLPV  
FIFDGETPVTKECEYNKMKFLL ECLEDLNEQFIEAGAKLYCIQGNPEEVLRLKLKHRVQINRVCFDQDCEAIWL  
ERDNNIRNYCVSHKIEVF EHGATLWDPLEII EANGGTPPLTYSHFCHVTKGIGEPKRPLPNIDLSTVSFYEI  
PDSILAE LKTFPGVPTPEDLGFYKGD EEEKIYKGGERTALKYFNRRMAVEKEAFLDGSFLPNRRDPDILNPPKS  
LSPDLKFGCISVKLFYWSTIDAFNQVNEKKSSSYLIVS QLIWREFYYAMSANNPFFAEMERNPVCINIPWKED  
EQALEKFNAARTGYPFIDAGIRQLKKEGWIIHVLRLNLSMFLTRGDLWLNWVHGEKLFRTYLI DGDAVNAGN  
WLWVSSSAFEKSLNYSYSLDPRVYGRHVDSHGKYIKRYIPELANYPVEYIYTPWKAPLEIQKKAGCII GKDYP  
EPMIDHDEAVAQNRQMMLSLQKDLLTQEKQPNHVRPSGDLEINLFFRIHD  
>Eurytemora\_aff\_XP\_023329370.1\_cry-1-like  
MSRNSKSKRKHSHVHFRKGLRLSDNPALLRAIRRCETFRCIFILDPWFAGSSNVGTNKWRFLLCLEDLDNGL  
RKLNSRLFVVRGQPADVLP TLFKAWGTTYFTFEEDPEPFGRVRDQNIAMCKEMGIVVTKEHSHTLYNLEKII  
YRNGGKAPLTYKTFQTIIESMDPPSKPVPTLTLLMLGTGITPLSDDHDEKYGVPTLEELGFDCDHLKQSVWEG  
GETEALSRLERHLERKAWVASFGRPKMTPQSLLASQTGLSPYLRFGCLSTRLFYHALSDLYRRIKKCDPPLSL  
HGQLLWREFFYCASTKNPNFDMVGNPICVQIPWDKNDEALAKWANAQTGFPWIDAIMTQLREEGWIHHLARH  
AVACFLTRGDLWVSWE EGMKVFEDELLDADFSVNAGSWLWLSCSSFFQQFFHCYCPVKFGRKADANGDYIRRY  
LPVLKNYPTRYIHEPWTAPDAVQKSARCIIGQDYKPKICHHPVVS KINMERMKQVYQQLAHYRQTGQTGPGIP  
QDLLNQLPKTPKIPKVPNVTTGGSMGPPNPPSNEKKKDGDCMDQPESSSQIQEQNWIGSCSKFSQDTWIRSK  
SQDWVGNPEAKVQDQTWIGSSSTPIPRASVLTDLQTTIDNKECTRAEEQASILSQTGGVIVYEQYNGANSQYI  
PYIQERKNSSQSTS IHQTS DCLPVL SVLTVNYSRLSACIICSICKLFQIVCLYYVF  
>Eurytemora\_aff\_XP\_023333098.1\_cry\_DASH-1  
MSASLKTAVYLFNRDLRLHDNECWVLANKTADYVIPLYCFDPAHFKKTWHFGLPKTGAIKRAKFLIETVNDLKT  
NLKTKNTDLVVKENPVSALKSLVEACRLSAPVTS LIYQKEVTFEEVNLENDLKKFCGNLDIKVHEVWGSTLF  
HLEDLPFKINRVPD TYTNFRKEVEGRSKVRRIVSDPQVIKPWPDSKIDGGSVPTLQVLGLEEPGLENRTAFPF  
SGGETSALGKTIFILGENYSTKFSPWLAFGSLSPRIYSEIKRYEDERSNKSTYWVIFELLWRDYFRFVCLK  
FGDKVFYRSGILGRDQAWIQDTNKFKAWVEGRTGVPFVDANMRELKETGWMSSLDWRFGAEWFESQLLDHVC

SNYGNWNYAAGIGNDPRENRRKFNMIKQGMDDYDADGEFVRTWVPELRKIPGGKIHVPWTLNDKELTSAGVDLGV  
NYPKPLVLAPEWGRHSQKTNKPPSYRDPKQGRPINAFFKPEYGGGGVQSGSGREGGGVQSGSGRGGGGGKKG  
PGRGKAPRGGRVQF

>Eurytemora\_aff\_XP\_023343976.1\_uncharacte

MVYRNVVWTALYEPILKERDSRLEKRLAGAGVHVDIEHSYLLHRPDQVTVAGVGARGIGSVTHFMECCSKSNPG  
DSIGKPIDPPRYLNNPTTWPTSHSLPQLRLYRKPVKADGSVVDWAKEIRASWKFGEDGGYQNLRKPIRLPYAN  
QPWSQNKAKHLKAWQRGNTGFPLVDASMRQLWKIGWMNNYMRHVVASFLISYLRIWIEGYNWFQDTLLDADVA  
INAMMWQNGGMSGLDQWNFMHPVDAAFTCDPQGEFVRTWIPELAGLPDKLIHQPWKCPKGVLSRAGVRLGEN  
YPNRIIENLEDAREQSLQDVTEVRRKHSRGFIDPQHGRDMTGIPCTLLGINGVKQNSILMVPLITRKEFIYRT  
GCPDAKDNYPYNAVLKGYVGRARDEEIERTNKVDFTASTMLEFKERKARLDKLNQVVEEDEGRRGGRRGGGIQR  
RTKTHDKFTKV

>Eurytemora\_aff\_XP\_023343983.1\_cry-1-like

FNCSPVHLFTCSLVHLFIRDWDARLLTWEEDTEPYAVSRDAKIKNIAKDLNVEVKTFCGHTLYNPEAIIAANK  
GDVPLTYQKFQGLLSKLGSPAKPLELPAVLPTESKPEDIDESKYDVPSLEDILKRAKKSDDLGLNKFPGGES  
EALKRLEDKICEKTRGVWLKFEKPNTSPNSLEPSTTVLSPYLKFGCLSPRTMYWQLQSIYKTGKHTEPPVSLH  
GQLLWREFFYTGVANTRNFDKMEGNQICKQIDWDSNPEKVAWAEARTGFPWIDAIMTQLRTEGWIHHLARHS  
VACFLTRGDLYQSWERGQEVFEELLLDADWSLNAGNWMWLSASSFFYQFFRVYSPVAFGKKTDPTEGYIRKYL  
PQLKKYPDKYIYSPWEAPLAVQKAAGCIIGQDYPRPIVDHTVISKINIGRMKKAYDAGKAGKETPKKKEGKEP  
PKKKQKTMDGFLAKK

>Evechinus\_chlo\_ACO51511.1

GKMHGFLRMYWAKKILEWTTSPEEALEIAIYLNDRYSLDGRDPNGYVGCWMSICGIHDQGWGERPVFGKIRFM  
NYKGCKRKFDVDTFINRYKKY

>Exaiaptasia\_dia\_KXJ19326.1\_cry-1

MQQLSSILAMXLICDPKFLVFKGMARQVSWHFRKDLRLHDNPALCESLANSDEFYAIYVLSPPFNKSIVSQR  
KKNFLQLSKLVLEENLQKLGSKLIVVQGNLLQVFPFILKHFGITKLTFTETACDRYGRQNEKVVEHLARELGIO  
VSSFASHTLFEVDEVVQVCGDSIPVLFEEYLDVVAQLQTPSKPYKVKCTPAYNIEKLLDETLVAQMYHLNDV  
QMSGELVGGEDNGLMKLEEYLEQNGTGFLIDAIMRQLRQEGWINSTAQDIVCRFLTTKGLWISWDKGKFTFD  
ALLLNSQWSLVAGSCMLSSQSSFFKKTIPLGFCPVKEAKRLDPNAEYINFVPSMGMDTSTLSILAHNTPHMLI  
FTEGGKPEYTEKKTLLERELGNGTTGFPWIDAIMRQLRQEGWIHNFAREAVGCFLTRGCLWISWEEGFKAFFE  
MQLDAEWGMNANCMMWLSLSCSSYVQGSVPWYCPVEVAKKFDPAQYIRRYVPEVRRLPKKYIYEPWKAPQVRQE  
AARCVVGFDPPEMCDHIKQREICVQKLSEHSKRLTTPIVTGEIVHPLNNDVLKHCDGDYHATERE

>Exaiaptasia\_dia\_XP\_020903321.1\_cry-DASH

MASKSRAVICLLRNDLRYHDNEVLWAYKNAEFVPLYCFDPRHFKCTWHFGFPKTGPFRAKFLVESVKDLRE  
QLKTKRNLVVRGKPEEVVLELISRVSNTETVKVEAIAFQSEPTKEELDVENAIQSGCGVPVHKIWGSTLYHI  
DDLPEFIKRVPDYTEFRKRVEAQSRVRSSIKMPETFKPLPPTVSEGLVPSLEELGIKESKDEPRSAFPFTGG  
ETTGLQRLNYYLWDTNLVSKYKETRNLIGHEYSTKFSTWLALGCLSPRKIYEEVKRYEKQRTSNQSTYWWIF  
ELLWRDYFKFVACKFGDRLFHLGLRGKNQEWKDDTLFKAWKEGRTGVFPVDANMRELAATGFMSNRGRQNV  
ASFLTDLKLDWRLGAWEFYYLLVDHVC SNYGNWLYSAGVGNDRQDRKFNMKIQGLDYPKGEYIRQWIPE  
LAGIPGGDVHTPWRLSQALSSAMVSLGETYMPVVTAPWXRHTSAKTKTGPKGSPQGRVAKRGIDFYFSSN  
SNGGKR

>Exaiaptasia\_dia\_XP\_020904995.1\_cry-1

MEVHVAHDSIRRRAINSLHWFRKDLRLHDNPALREAVLNCDTFRVYIFDTRNAQNSTIGINLWRFLLOSLE  
ELDGSRLKLNRLFVVRGQPADVLPRLFEQWRITKLTFTEDTEPFGKERDSAIRMLAREAGIDVVVKRSNTLY  
DLQEIISRNNDKPKTYKSFLNLVLRMSPPDLPVNTITHNSVGLGFTPFDESLLDQYGIPTLQELGLDASKLC  
SEVWQGGAEALNRLDRHLERKAWIASFEQPKINSNSLIATTNGVSPYLRFGCLSPRLFYHRLSDLFRKLKRRK  
VPPISLYGQLLWREFFYCVSTNNPNFDKMVHNPLCLQVEWRDDGRVEEDLERWAKGQTGFPWIDAVMAQVRQE  
GWIHPLARYAAASFLTRGDLWISWERGKVFEEFLDADWSINAGNMMWHSCSAFSQHFFYPQCPIGFGKRLD  
ANGDYISKYLPVLKGFPPNYIHEPWKAPPHVQKLARCIIGKDYPSPMLDHEEKREKENLARIVNILEYTTEDKP  
EISYKEIDDKPEQDLDFLALSSSG

>Exaiaptasia\_dia\_XP\_020910442.1\_photolyase

MATSEPPSKAKKESKGSXEEIDIMKHYNEKRKGVCDSVLDFKFNKKRVRLTSTTDMKDDCKGILYWMWRDQ  
RVQDNWALLYAQRLALKQVPLHVCFLPKQFLDATIRKYGFMKGLQFVEKELEDLDIKFHLLLGEPDQVLP  
GFVKEFGGGIVCDFCPLRLPMKWVNEFVKSLPKDVPLCQVDAHNIVPCWEASPKLEYGARTIRPKIHKVLQS  
FLTEFPPIKHPHQTEVKSAGADWSAIDFIEVDSSVPEVDWAKPGTAAGLNMLESFCKVRLKNFGASRNDPT  
KNAISNLSPWFNTGQISNQRTILKIREYRGKYKDSVESFIEESVVRRELSNFYCYNDKYDSIEGTNDWAKKT  
LKDHASDKREYLYDREALETAKTHDNLWNAAQRLTREGLHGLRMYWAKKILEWTKTPETALADAIYFNDK  
YALDGIDPNGYVGCWMSICGIHDQGWAERPVGKIRYMNKYGKQKFDVAEFIRRYKP

>Exaiaptasia\_dia\_XP\_020915067.1\_cry-1\_X1

MAAKRVHHTIHWFRKGLRLHDNPALREAYDTSLTVRVPYILDPDLVKCGQIGVVRWRFILQSLEDLDQSLRQI  
NSRLLVIQGRPSEVFADLFKKWEITKLTFEVDTDXXAKAXDEEVIKLASQANVEVVQKVSHTLFDLDAILAKN

LGTAPLYKSFQAVVSTLGAPDEPLPAVDRIYITHGCKLPIDDEHDRIYSIPTIDDLGLSIPESSEVLYPGGEV  
EALRRMNEYMAKQDWVCKFEKPSTSPNSIEPSTTVLSPYLALGCLSVRLFYKKIQEIYSKAKKHSQPPVSLHG  
QLLWREFFSTCAHNTNPNFNKMEGNRVCLQIPWDKNDDHLKAWSTGCTGFPFIDAIMIKLRKEGWIIHLLARHAV  
ACFLTRGDLWISWEEGLKVFFENLLIDHDWSLNAGNWMWLSASAFFHAYFRVYSPIAFGKKTDPNGDFIRKYL  
VLKRFPAKYIYDPWNSPLSVQQAAGCVIGKDYKPIVDHXKAVTKNLARMKQAREAKYGSQAANVKKSPPKR  
KRSSEKTNGKVRKITDFTKS

>Falco\_cher\_\_XP\_005442448.1

MSGVARTAICLLRCDLRAHDNQVLHWAQSNADFIPLYCFDPRHYLGTHCFGFPKTGPHRLRFLLESVKDLRE  
TLKKRGSTLVVRKGKPEDVVCDLITQLGSVSAVAFHEEATQEELDVEKLLCEVCCQHGVKTHTFWGSTLYHRD  
DLFFRPIARLPDVYTHFRKAVESEAKVRPTLQMAQDLKPLAPGVEEGCIPTMEDLGQKDPVTDPRTAFFPCSGG  
ETQALMRLQYYFWDTNLVASYKETRNLVGM DYSTKFAPWLALGCISPRYIYEQIQKYEKERTANQSTYWVLF  
ELLWRDYFRFVALKYGRRIFFSLRGLQNKVEVPWKDLQLFDCWKEGKTGVFPVDANMRELAATGFMSNRGRQNV  
ASFLTKDLGLDWRMGAEWFYLLVDYDVCSNYGNWLYSAGIGNDPRDNRKFNMIKQGLDYDSNGDYVRLWVLE  
LQGIKGADIHTPWALNSAALSQVGVTLGKTYPPVVTAPESWRHINQRBPQERSPHPRGRGPAHTPRQHKDRG  
IDFYFSRKKDA

>Falco\_cher\_\_XP\_005443744.1

MPRGQRKRKAEGTELPVSRRRKEEEEAVQEARRRAAPS VREFKYNNKKRVRLVSQGS DLKENARCILYWMSRD  
QRLQDNWAFLYAQR LALKQELPLHVCFLVPKFLDATIRHYGFMLRGLQEVAEECAELNIPFHLLLGAKDVL  
PVFVVEHGVGGLVTD FCPRLRSRQWVEDVRERLPEDVPFAQVDAHNIVPCWVTSPKQEYSARTIRGKIHAQLT  
EFLTEFPPIRHPYPPSCPAEPIAWEACYSSLQVDRVTKEVEWATPGTTAGLAVLQSFITERLKSFSSSHNDP  
NKAALSNLSPWFHFQVSTQRAILEVQKHRDKYKESVD AFVEEAVVRRELAENFCYNNENYDSVQ GAYDWAQT  
TLKLHAKDKRPFLYKLQELEQGATHDPLWNAQLQMVREGKMHGFLRMYWAKKILEWTRSP EALQFAIYLND  
RYELDGRDPNGYVGCLWSICGIHDQGWAERAIFGKIRYMNYAGCKRKFDVQGQFERRYAPHTCSQ

>Falco\_cher\_\_XP\_014135100.2

MDRFLQLSLEDLDNSLRKLSSRLFFVVRGQPTDVFPRLFKEWGVTRLTFEYDSEFPFGKERDAAIVKLAK EAGVE  
VVIENSHTLYDLDR IIELNGHKPPLTYKRFQAIISRMELPKKPVSTVISQOMEACKVDIQENHDDVYGVPSLE  
ELGFPTDGLAPAVWQGGETEALARLDKHLERKAWVANYERPRMNANSLASPTGLSPYLRFGLSCRLFYRYL  
WELYKKVKRNSTPPLSLYGQLLWREFFYTAATNNPKFDRMEGNPICIQIPWDRNPEALAKWAEKGTGFPWIDA  
IMTQLRQEGWIIHLLARHAVACFLTRGDLWISWESGVRVFDELLLDADFSVNAGSWMWLSCSAFFQ QFFHCYCP  
VGFGRRTPSGDYVKRYLPKLKGFP SRYIYEPWNAPESVQKAACIIIGVDYPKPMVNHAETSRLNIERMKQIY  
QQLSRYRGLCLLQSV PSCVEDLSGPVTD SASGQGCSTSTAMRLSQADQASPKRKHEGAEEELCAEELYKRAKVT  
GLPAPEIPGKSL

>Falco\_cher\_\_XP\_014141780.1

MEPLEMPVETITPEVMEKCTTPVSDDHDEKYGVP SLEELGFDTDGLPSAVWPGGETEALTRLERHLERKAWVA  
NFERPRMNANSLASPTGLSPYLRFGLSCRLFYFKLTDLYKKVKKNSSPPLSLYGQLLWREFFYTAATNNPR  
FDKMEGNPICVQIPWDKNPEALAKWAEGR TGFPWIDAIMTQLRQEGWIIHLLARHAVACFLTRGDLWISWEEGM  
KVFEELLLDADWSVNAGSWMWLSCSSFFQ QFFHCYCPVGFGRRTPNGDYIRRYLPVLRGFP AKYIYDPWNAP  
ESIQKAAACIIIGVNYPKPMVNHAESRLNIERMKQIYQQLSRYRGLGLLATVPSNPNGNGGMLMGYSPGESI  
SGCGGTGAAQLGTGDGHTVVQPCALGDTHTGASGIQQQGYCQASSILHYAHGDNQQSHLLQAGRTALGTGIST  
GKRPNPEEETQIVGPKVQRQSTN

>Falco\_cher\_\_XP\_027658934.1

MQHSSIHWFRKGLRLHDNPALLAAATDCCCLHPLFILNPSNSQAGTNAQRFLLDALRDLDGSLQKIGSRLFFV  
RGCPEEVFPSLFHAWGTTLLTFEVDTEPSARQDATVAKLAAQHGV EVIQEVSHTL YDTERVLALNKGKAPLT  
YKRLQSLLATLGPPEKPAPALTQEHLQGCHTPCQASHDTDYGVPNLEELGQDPTNVGPHLYPGGETAALTRLD  
ALMERTAWVCSFQKPR TAPTSLSPTTVLSPYLKFGCLSVRTFWWRLDQVYQGEHSQPPTSLHGQLLWREFF  
YTAGASIPNFDRMAGNPVCLQVDWDNNPQHLHAWREGQTGYPFIDAIMTQLRTEGWIIHLLARHAVACFLTRGD  
LWVSWEEGLKVFEELLLDADWSLNAGNWLWLSGSAFFHQYFRVYSPVAFGKKTDRDGAYIRKYVPI LKDFPAE  
YIYEPWKAPRAVQERAGCLVGTHYPQPIVEHGVASKRNLGRMKLAHARKGNKSPVRHQAHFTSSCHPSCLSLP  
QAPSESHWLVPQWPNHKGKSPRPRGSEPHKDVQAVVSYGSC TTPCVLTHFAQPPCINPFPSPLRLATWLLPP  
PQKSTPTPSTCPKKG

>Falco\_cher\_\_XP\_027672562.1

MLHRTIHLFRKGLRLHDNPALLAALESSEAIYPVYILDRKFMTSVMHIGALRWHFLLQSLEDLQKNLSQLGSC  
LLVIQGEYESVLRDHVQKWNITQVTLDAEMEFPYKEMEANIRRLGEELGF EVL SLVGHSLYDTRKRI LDNGGS  
PPLTYKRFLHILSLLDPEVPVRNITAEDFQRCRAPELCLAEYRVPLPVDLKI PPESLSPWKGGETKGLQRL  
EQHLTDQGWVASFTKPR TIPNSLLPSTTGLSPYFSMGCLSVRTFFYRLSNIYAQAKHSLPPVSLQGGQLLWRE  
FFYTVASATPNFTKMAGNPICLQISWDEDAERLHKWKTAQTGFPWIDAIMTQLHQEGWIIHLLARHAVACFLTR  
GDLWISWEEGMKVFEELLLDADYSINAGNWMWLSASAFFHQYTRIFCPVHFGRRTDPEGQYVRKYL PVLKNFP  
SKYIYEPWMASEEEQKQAGCIIIGRDYPFPMVNHKEASDHNLQLMKQVREEQYGT AQLTRDDTDDPMEMKPGCK  
AAPGLSDGCERLAAGSWRC

>Fasciola\_hepa\_\_THD28195.1

MASENSFLIKIEKKRVNTAKSVLDFKFAKSRIRHLHGPEEFPGLVDESEAPMSVLYWMIRDQRVQDVAMGRL  
TTQLSTTCALSVVCEIPRHYWENKHVLSSEQKETDFRGGMNNWAMLYAQRLALKFRVPLHVCFCCLAPCYQAD  
TLRHLSFMLSGLVEVEQECSRSLNIPFHLVNADNHLGPDENRKSGMQARWSPNYTTSSSAQIYDAAVAQAVGSL  
VKSLHVGCLVVDIFSPLRAPSAWVESVVRALPEDIPVCQVDAHNIVPVWCGSDKLESHARTIRPKLFSKTVKYL  
TEFPPVIIHPFQNEMDTNCQSMIDWQSIKANHFVDSSVDAVTWATPGTKAAFEVLRSFIEERLKGFDAQRNNP  
ANPALSGLSPLWFHFGQISPQRSILEVSAVRKSYVRSADIFIEEAFNRRELAENFCFYNRLYDCLQGAREWAQE  
TLMKHAKDKRLVAYTRKQLENAETADDLWNAAQORQLVHTGKMHGFLRQYWAKKILEWCAEGPQTAIDWAVYLN  
DRFSLDGTDPNGYVGMCGVLLFAFCFRTNNLLAVSHLAFDKLCQTFITYT

>Fasciolopsis\_busk\_\_KAA0185550.1

MLYAQRLALKFQVPLHVCFCCLVPSYQADTLRHLSFMLGGLMEVEQECHSLNIPFHLINAGDYLTDPDEDLISGV  
VARWSPDFTTSSIPQLYAQAVSRAICRLVDSLYTGCLVVDIFSPLRAPSAWVESVIQNLPENIPVCQVDAHNVV  
PVWCGSNKLETHARTIRPKLFSKTAKYLTEFPPVIVHPFQNELSINLRPSMTDWQSIIRAGRYVDSSVDVVAWA  
NPGTKAAFEVLHSFIKDRCLKGDAQRNNPANPSLSGLSPWFHFGHIAQORSILEVSAVRKLYGRSADIFIEEA  
FNRRELADNFCFYNPPLYDCLQGAREWAQETLMAHSKDKREVAYSREQLENAKTTDDLWNAAQORQLVHTGKMHG  
FLRQYWAKKILEWCAEGPQTAIDWAVYLNDRFSLDGTDPNGYVGIMWAICGIHDQGWNERKIFGKVRCTYNG  
CKKWFSIPEFVMRFPE

>Felis\_catu\_\_XP\_003989258.1

MGVNAVHWFRLRLHDNPALKECIQGADTIRCVYILDPWFAGSSNVGINRWRFLQCLELDANLRKLNSRL  
FVIRGQPADVFPRLFKAWNITKLSIEYDSEPFGERDAAIKKLATEAGVEVIVRISHTLYDLDKIIEINGGQP  
PLTYKRFQTLISKMEPLEIPVETITSELIEKCTTPLSDHDEKYGVPSLEELGFDTDGLPSAVWPGGETEALT  
RLERHLERKAWVANFERPRMNANSLLASPTGLSPYLRFGLSCRLFYFKLTDLYKKVKKNSSPPLSLYGQLLW  
REFFYTAATNNPRFDKMEGNPICVQIPWDKNPEALAKWAEGRTGFPWIDAIMTQLRQEGWIHHLARHAVACFL  
TRGDLWISWEEGMKVFEELLLDADWSINAGSWMWLSCSSFFQQFFHCYCPVGFGRRTPDNGDYIRRYLPVLRG  
FPAKYIYDPWNAPEGIQKVAKCLIGVNYPKPMVNHAEEASRLNIERMKQIYQQLSRYRGLGLLASVPSNPNGNG  
GLMGYSPGENIPGCSSSGSCSQSGSILHYTHGDSQQTHLLKQGRSSMGTGLSGGKRPSQEEDTQSIGPKVQRQ  
SVN

>Felis\_catu\_\_XP\_023095565.2

MAAAVVTAAAAAPAPAAGADGASSVHWFRLRLHDNPALLAAVRGARCVRVYILDPWFFAASSSVGINRWRFL  
LLQSLEDLDTSLRKLNSRLFVVRGQPADVFPRLFKEWGVTRLTFEYDSEPFGERDAAIMKMAKEAGVEVVTE  
NSHTLYDLDRIIDLNGQKPLTYKRFQAIISRMELPKKPVGSVTSQQMESCRAEIQENHDEAYGVPSLEELGF  
PTEGLGPAVWQGGETEALARLDKHLERKAWVANYERPRMNANSLLASPTGLSPYLRFGLSCRLFYRLWDLY  
KKVKRNSTPPLSLFGQLLWREFFYTAATNNPRFDRMEGNPICIQIPWDRNPEALAKWAEGKTGFPWIDAIMTQ  
LRQEGWIHHLARHAVACFLTRGDLWVSWESGVRVFEELLLDADFSVNAGSWMWLSCSAFFQQFFHCYCPVGFG  
RRTPDPSGDYIRRYLPILKGFPSRYIYEPWNAPEIQKAAKCIIGVDYPRPIVNHAETSRLNIERMKQIYQQLS  
RYRGLCLLASVPSCVEDLSNPVAEPSSQTGNVSSAGPRALPSGPASPKRKLEAAEEPPGEELSKRARVAGLP  
APELPSRDV

>Ficedula\_albi\_\_XP\_005039905.1

MGVNAVHWFRLRLHDNPALRECIQGADTVRCVYILDPWFAGSSNVGINRWRFLQCLELDANLRKLNSRL  
FVIRGQPADVFPRLFKAWNIAKLSIEYDSEPFGERDAAIKKLASEAGVEVIVRISHTLYDLDKIIEINGGQP  
PLTYKRFQTLISMEPLEMPVETITPEVMKKCTTPVSDHDEKYGVPSLEELGFDTDGLPSAVWPGGETEALT  
RLERHLERKAWVANFERPRMNANSLLASPTGLSPYLRFGLSCRLFYFKLTDLYKKVKKNSSPPLSLYGQLLW  
REFFYTAATNNPRFDKMEGNPICVQIPWDKNPEALAKWAEGRTGFPWIDAIMTQLRQEGWIHHLARHAVACFL  
TRGDLWISWEEGMKVFEELLLDADWSVNAGSWMWLSCSSFFQQFFHCYCPVGFGRRTPDNGDYIRRYLPVLRG  
FPAKYIYDPWNAPEIQKAAKCIIGVNYPKPMVNHAEEASRLNIERMKQIYQQLSRYRGLGLLATVPSNPNGNG  
NGGLMGYSPGESISGCGSTGGAQLGTGDGHTVVQSTCLGDSHSGTSGIQQGYCQASSILHYAHGDNQQSHLL  
QAGRTALGTGISAGKRPNPEEETQSVGPKVQRQSTN

>Ficedula\_albi\_\_XP\_005040598.1

MSRAAGTAICLLRCDLRAHDNQVLHWAQHNAADFVVPVLYCFDPRHHLGTHCYGLPKTGPHRLRFLLESVKDLRE  
TLKRKGSTLVVRKGKPEDVVRDLITQLGSVTAUVFHEEATQEELDVEKGLCQVCRQHGVQIHTFWGSTLYHRD  
DLPPFRPIDRLPDVYTHFRRALECGAKVRPTLRMPDLLKPLAPGLEEGNIPTMEDFGQKDPVTDPRTAFCPSGG  
ETQALMRLQYYFWDTNLVASYKETRNLVGM DYSTKFAPWLALGCISPRHIYEQIQKYERERTANQSTYVWL  
ELLWRDYFRFVALKYGRRIFSLKGLQSKEIPWKKDLQLFERWKEGRTGVFPVDANMRELSATGFMSNRGRQNV  
ASFLTCKDLGLDWRMGAWEFFYLLVDYDVC SNYGNWLYSAGIGNDPRDSRKFNMIKQGLDYGNGDYVRLWVPE  
LQAIKGADIHTPWALSSAALSQAGVTGETYPQPVVTAPEWSRHIHQRPGGSPHPRGGRGPAQHKDRGIDFYF  
SRKKDAC

>Ficedula\_albi\_\_XP\_005047216.1

PLGPAPALCRSVHWFRRGLRLHDNPALQEALRDATSLRCIYILDPWFFAASSAVGINRWRFLQCLELDNLSL  
KLNSRLFVVRGQPTDVFPRLFKEWGVTRLTFEYDSEPFGERDAAIKKLAKKEAGVEVVIENSHTLYDLDRID  
LNGHKPPLTYKRFQAIISRMELPKKPVSTVISQQMETCKVDIQENHDDVYGVPSLEELGFPTDGLAPAVWQGG  
ETEALARLDKHLERKAWVANYERPRMNANSLLASPTGLSPYLRFGLSCRLFYRLWELYKKVKRNSTPPLSL

YGQLLWREFFYTAATNNPKFDRMEGNPICIQIPWDRNPEALAKWAEGKTGFPWIDAIMTQLRQEGWIHHLARH  
AVACFLTRGDLWISWESGVRVFDLLELLDADFSVNAGSWMWLSCSAFFQQFFHCYCPVGFGRRTDPSGDYVKRY  
LPKLKGFPSRYIYEPWNAPESVQKAACKIIGVDYKPKMVNHAETSRLNIERMKQIYQQLSRYRGLCLLASVPS  
CVEDLSGPVTDALGQGCSTSTAVRLSQAEEQASPKRKHEGAEEPCPEELYKRAKVADLPASEIPGKSL

>Ficedula\_albi\_\_XP\_005059365.1

MLHRTIHLFRKELRLHDNPVLLAALQSSEALYPVYILDRAFTSSMHIGALRWHFLLQSLEDLHKNLCQLGSC  
LLVIQGEYETVLRDHIQRWNITQVTLDAAEMEPFYKEMEANIQRLGAELGFEVLSLVSHSLYDTQRILDINGGS  
PPLTYKRFLHILSLLGDPEVPVRNLTAEDFQRC SAPDADLAESYRVPLPEDLKISPENLSPWRGGETEGLQRL  
EQHLTDQGWWASFTKPRITIPNSLLPSTTGLSPYFSMGCLSVRTFFYRLSNIYAQAKHSLPPVSLQGQLLWRE  
FFYTVASATPNFTQMAGNPICLQICWYKDAERLHKWKMAQTGFPWIDAIMTQLRQEGWIHHLARHAVACFLTR  
GDLWISWEEGMKVFEELLLDADYSINAGNWMWLSASAFFHQYTRIFCPVRFGKRTDPQGN YIRKYLPI LKNFP  
SKYIYEPWTASEEEQKQAGCII GQDYPFPMVNHKEASDHNLQLMRQVREEQHRTAQLTRDDADDPMEIKVKRD  
HSEENISKGKVARTTE

>Ficedula\_albi\_\_XP\_016156003.1

MRRGRGKRKAELTEVPPASRRRTEEEEA IENARRRAAPS VREFKYNNKKRVRLVSQGSSELKDDARCILYWMCRD  
QRVQDNWAFLYAQR LALKQELPLHVCFLVPKFLEATIRHYRFMLRGLQEVAQECAELNISFHLLLGyakDVL  
PTFVAEHGVGGLVTD FSPLRLPRQWVEDVRERLPEDVPFAQVDAHNIVPCWVASPKQEYSARTIRGKIHAQLP  
EFLTEFPVVRHPHPSPCPAQPIAWEACYSSLQVDHTVKEVEWATPGTAAGMAVLKSFIAERLKSFSSTHRNDP  
NKAALSNLSPWLHFGQVSTQRAILEVQKHRNRYKDSVDAFVEEAVVRRELAENFCYNNENYDSVQGAYDWAQT  
TLKLHAKDKRPYLYSLQELEQGTHDPLWNAAQ LQMVWEGKMHGFLRMYWAKKILEWTRSP EALQFAIYLND  
RYELDGRDPNGYVGCLWSICGIHDQGWAE RPVFGKIRYMNYAGCKRKFDVERFERRYAPTRSQ

>Firmicutes\_bac\_HDS30348.1\_photolyase

MESERLRIIRPGEIARGPVVYWM SRDQ RVSNNHSLVYAQSFAIREKVPLAVVFC LADNFLVATLRQYDFMLRG  
LTETALS LGEKNISFHLLRG NPGTEIPKFVKENKIGMLVGDFDPLKIKREWKNEVAKKISVPFHEIDSHNVVP  
CRAVSGKQEYGAYTIRPKIQRL LKKFMVLVPKIVRHPVSFDRN PENIEWEKI IAGLKIDRSVPPEWIKPGEK  
NARAMLKKFLIHGISRYSAERNDPNADAQSNLSPYIHFGQISAITVALETIKKSPDDENRRAFLEELIVRREL  
SDNFCWHNENYDNIGGIPGWAKASLREHKS DKREYIYMEREFESASTHDRLWNAAQIEMV KRGMHGWMMRYW  
SKKILEWTKSPDEAIRIAIYLNDKYELDGRDPNGYAGILWSIGGLH DRPWGEREIFGKVRYMNYNGARRKFDV  
ERYIERFGA

>Fistulifera\_sol\_GAX13915.1\_photolyase

MIINPDPVHHIPKSELPEWFIPSR S RLLTDPNLTSKSSNAKDGSVVYWMQRDMRARDNWALCLASYFAAQKGL  
PLRVVYAFAPPPKRLDPMPSLQDLP MTRRHGNFLLGGLELVHKELEEKKIPLHFVMAESHE SVGEEVCRLLE  
ELRACLVSDFSPLRQFREWME LQATPLLNNAAVPFYQVDTHNIVPVWTAAPNRQVGARTLRPKINNVIKTYL  
KEFPVMAGNTQDVELPKFERDVYEAYLKIDETVKDWDWAI PGTDAGLQQFRKFCQVGLPKYNEHRNDPVQPHI  
CSNLSAWINHGHISFQRLTMDVYKLNKYPTGVAGFVEEGVVRRELS DNYYVEPNHYDSLDAADWAKESLQL  
HTADPREHLYSTEELEQGKTHDELWNAAQ LQLVREGGMHGFMRMYWAKKILEWTESPEIALKTSQYFNDRYAL  
DGKDPNGFVGWWSIMGIHDQGWQERP VFGKIRYMNYNGCKRKFSIPQYVARYEGALRNAETVPSVKVLGSSA  
KSSKGAPKKRVTNTTLDVFLK KKKH

>Fistulifera\_sol\_GAX23745.1\_cry

MHDVSIHWYRNGLRFDHNPTLLDACQQSKTMLPLYVIDPDAPFAQTQGLRPACIRANFVMESI QEVDKKLRNM  
NSQMIVILGPKPKQVIPEVVALLGASALFYEQEAAAPIRKADAEILQELKSKVGTDCDCKGYPHSLHPMELYL  
SKCKGNVAPSSYGAFTKIFNSLKVPEVEEVTQVPLPEDALRKLDKDFGEQLRLPSLEDLGYENTKEKLKNR  
AKGGIDFIGGEDAGLALLRYMMSRKQWVATFEKPNTSPNALKVDTTGLSPYVKHGCVSPRTFYHQLSKVYAQF  
NSKEISKPPVSLHGLMWREYN YLMGYSTPNFHQ MADNPVMRQIPWDDDPQLLSVWENSQTGYPFIDALMTQF  
RETGFLHHLGRHAVACFLTRGDLWQSWEKGAEVFEYYLVDADWSINNFWQWLSCSAHFYQYFRCYSPVAFGK  
KTDPDGT YIRKWLPMFKDMPSKFIYEPWEAPLAVQEKCGVIIGKDYPYPIVDHKIVSKDNMSRMKEAYDSQKN  
GLPMPE SQPVETNEKRITFADSSNSEDASQEPDSKRKK

>Fistulifera\_sol\_GAX28242.1\_photolyase

MSTVAKKASCQAVYYWFRNDLRLHDHPALTA AIQRASQLQVPLIPVYCFDPRYFGSEAYSEYGSWKCSPRRAQ  
FVLESVSDLQQR L MNAGSNLVVVTRQTPEDYFMTCKTTHHPKAFLFYQEEVCREET TIAKKVTQHFRQNVQA  
IWGSTLYELSELPPYDAPESMPDTFT PFRNKVEKKCVIPKPLPAPTKLPFPADLTTPASKLTLADIGYEGM  
LEKLSHDPRGVMEFVGGETAGLARVKDYIWT KDLLRHYFDTRNGMLGADYSSKFAPWLAHGCISPRFVAQQCQ  
RYEQERVENKSTYWLIFELLWRDFFKFFAWKHGDTL FQPGGTIQSTKRWKTFEKSLQAWKEGKTGYPLVDANM  
RELNATGFM SNRGRQNVCSFLCLELMQDWR LGADYFESTLLDYDVYSNWGNWCSGAGMTGGRINRFNIVKQSK  
DYDQHGEYVKHWLPELKNVPANLVHEPWKMTQFQQTEYN CRLGVDYPHPIVKPPF DATPKQGPDTKGGRANGQK  
GKLDTNPNR SRGQRRDMKSLNKGSYRVEG

>Fragilariopsis\_cyl\_OEU14018.1\_FAD\_bindin

WMQRDMRTIDNWALNLAQHHA EKSNLPLRVVHVMTTPPPSSDDDDDEPPPLEQLRTTERHGRFLLGGLQCVHN  
ELNKKNVPLHIHNSYDTQHQQHPNVLENFLNDYNPSVVCDTNVLRHVRRWNESPV LKNALDAINVPLYQVD  
AHNIVPVWYASPKREVGARTLR SKLHRLVDECLQNKDHKNGSIPAFSHEQFLDWDDSVKDVLT KDQKPGTAGG

RKQFDDFCNTGLRHFSMLRNDPNNDQISSSLSPWFNHGHLSFATCLRYLKTHNRDAEGKASFIEEGFVRRELS  
DNFLWYAPDITYDTLEAGAQAQDSLELHTSDPREYIYTLNEFESGKTHDDLWNAAQIQMMNTGKMHGFLRMYW  
AKKILEWTSTPADALQYAQYFNDKYSLDGRDPNGFCGVAWSIFGNHDMGWKEREIFGKIRFMNYKGCKRKFKV  
DEFVRK

>Fragilariopsis\_cyl\_OEU16032.1\_FAD\_bindin

MDLIGCGVCSGFFYQYFRCYSPIVFQKKNDPNGNYIRKYVPELKDLP SKYIYAPWEAPTALDKAGVKLGKNY  
PRPVVDHKVISKENMNRMLAYVDHKAREAASVAAAKEKKPSKKKQRTS

>Fragilariopsis\_cyl\_OEU23746.1

MKPSRTISTTSSFSTRVELFFKNPDDLKDRIRFLQSEGISR FNIVNKDKKDTMNVWIDSIREVYPESNICAHY  
SLKYNKVPRKGIAEQRD PFLKDLEEDYCNAD EILLISGSGKKTQWNTIEALKAVQDIKSTSAESS SKTKPK  
ISVAYNPFYFPSSSDQEEENRRLEEKFATGCVSKIY LQFGTDLNSLKN GIEFCYSKAKELNYDDISIAGSLFLP  
TKQLIAQQKFRPWNGVFLSQEFLSGPEHATAIVSEMIKIYMKNNI ELLWEAPGIRTEKDMGMVHDIMERAVGS  
KDDEITGNKETVSSSTTGTSNSDIDISATKRPKLMINNARSSLEKKNIIRSDDPCLLI FGTHDVR LQDNKAVE  
EATRRHKIVLPVFLWTKEDSDGMWSAKGAI AVCLQDALYSLETSLQSFDLHLECR LCTNTDDGPEHGVT EIRD  
LIDKVGAKAVFWNKEFTPEGRKRGD FRKDFLIKRGVQVYETQSSLLYDPDKIELSSDFDGGHFATLMPFLNNC  
RKNFGPPRPPTPRVDTRFRLLEETSLPTYTDSISTSTVNDLNIVKVTGNHKWDEPIRKRFP MSEKAANDAMEVF  
ARNGMKKYEMERSRADQDGATSQ LSPHLRIGTLSPNQLYWRIEDSGLSPKTLARRLIWRDLAYYQLSVFPDMR  
TRCIRSHYEDMEWVDGPDEEERRFHAWKTGMTGFPIVDAGMRELYATGWM TQSIRMVVASFLVEYLRVNWTKG  
CEWFHYTLVDADSAINAMMWQNAGRSGIDQWNFILSPTTASQDSTGAYTQRWVPELADLPTSALIHRPWE GSI  
DVLLQAKVVLGR TYPHRIVTDLKAERQLSVDSTLSMRKSQEYND SRGYDLIQLPNGSKTIVFTKKEYRINEN  
GGLLKNDP TSVRRKKTTRRK

>Fragilariopsis\_cyl\_OEU15165.1

MASRGVVG LTTQPASRISYSNGQHGG L VFYWFRLGDLRLHDNPGLERAAAYCRETQSNLIPLFCFDPRIFGAA  
AITEFGSMKCAPRRAKFVIESIDDLKRSLEERGSKLLISSEKPEELFSRILKDASSETHNKIIYQQEVCSEEI  
EIANNVEKLFKSSEAVWGSTLYDLKDLPYDDSL EDPNGFTA FRNKVEKNCSIRGPLPIPKDLNTISNNQDLT  
SMIDQYSIELPSLQDLGYTLDQIDHANFQDPRGVM TFRGGETAGLARVKEYLWDKDLLKTYFDSRNGMLGSEY  
SSKLSPLAHGNISPRYLASECKKYEETRVANKSTYWL VFEVLWRDYFKYFAKKHGDKIFSAGGITGSSPEWK  
HYEKNLQAWIEGKTGFPLVDANMRELGATGFMSNRGRQNVCSFLALELNL DWRYGADYFESALLDHDVHSNWG  
NWCAGAGMTGGRINKFNIVKQ GKDYDQHGEYVRHWLPELKDVP T NIIHEPWKMSQFQQVGSNCRLGVDY PNP I  
VKPYSPNPKNSGRSKGDN SKPSPNNNRGRGQRKDMKSMKKGSYDIRG

>Frankliniella\_occ\_KAE8746400.1\_cry\_2,\_par

MCSSESESEFITSPSAGSAATSIRPSPALSAATASAAAPRTKHSVHWFRKGLRLHDNP SLRHGLKGATTLCI  
YFLDPWFAGSSNVGINKWRFL LQCLEDLDRSLRKFN SRLFVIRGQPADALPKLFKEWGTNLTFEEDPEPFGR  
VRDQ NIMAMCKELSISVSVKSHTLYELEKII EKNGGKPLTYHQFQNVVASMDPPPQAMPTITSRNMQDCYT  
PIEDDHDEKYGVPTLEELGFDT E GLKPAVWLGGETEALARLEHHLERKAWVASFGRPKMTPQSLLASQTGLSP  
YLRFGCLSTRLFYYQLTDLYKKIKKAVPPLSLHGQLLWREFFYCAATRNP NFDMQGNPVCVQIPWDHNL EAI  
AKWANGQTGF PWIDAIMTQLREEGWIIHHLARHAVACFLTRGDLWISWEEGMKVFEELLLDADWSVNAGMWMWL  
SCSSFFQQFFHCYCPVRFRGRKADPN GDIIRYLPILKNFPTRYIHEPWSAPENVQRAAKCVVGKDY PKPMVNH  
GTASRINIERMKQVYTQLSKYRGS

>Frankliniella\_occ\_KAE8747724.1\_6-4\_Photol

MSKATAVHWFRKGLRLHDNPALVAALKSEIELRPVYIFDPWYEKNVLCGPNRWRFLHQSLTDLDKSLRDIGSR  
LFVFRGTPEEVFTSLFSEWKVQRLTFEIDIEPYALERDEQIIKIARQEDVEVIQKISHTLYNTELVLKANMDK  
PPLTYQKLVSLLQSLGEPPEAVAAPKELLSEQRVSSKLLDSHDYDIPTLEDLGVDQSQLGPCLPFGGETEGLA  
RLGRCLERKEWISTFEKPKTIPNSLSPSTTVLSPIRFGCVSSRLTYHKINEILKVYKKH SKPPVSLIGQMYW  
REFYYVASATPNFDMIGNKVCCAVPWDENPEFVEKWAQAQTGYPFIDACMRQLRQEGWIIHHLARHAVACFL  
TRGDLYQSWEVGQKVFEELLLDADWALNAGNWMWMSASAFYHQFYRVYSPVAFGKKTDVLGQYIR

>Frankliniella\_occ\_XP\_026276018.1\_photolyase

MSSNKEPPKKIKVNDSPSSPSVSAQSNLKQRLMLDRKETAESILNFKFNKKRVRI LSKATEVPSDCKGIAYW  
MFRDERVQDNWAF LFAQKLALKNKVPLHVCFLLT KFLDGTIRQFKFLKGLREVQKECEELNIEFHMYGSG  
GDVM PGFVEKNIGALVIDFMPLRNVMAYADQLKALPKDVPLCQVDAHNIVPCWEASNKLEYGARTIRPKIH  
KQLPEYLTQFPPIKHPYSGPLKAEKVDWRCEAHLEVDRSVDEVEWAVPGYSGGIATLESFINKRLKFFG TK  
RNDPTQDALSNISPLWHFGQVSAQRCILVVKALRSKYPE SVDGYIEEAIIRRELSDNFCFYNP KYDSIEGTND  
WAKKTLNDHKKDKRPYLYTREELRDSKTHDDLWNSAQIQLVKEGKMHGFLRMYWAKKILEWTASPEQGLADAI  
YLNDRYSLDGRDP SGYVGC MWSVCGIHDQGWGEREVFGKIRYMNYQGCKRKFDISAFVARYGGKVYTKSATMD  
KFLT GKKK

>Frankliniella\_occ\_XP\_026282294.1\_cry-1

MATSDNNMCDKATV LWFRRGLRLHDNPALIKALSTKNVFYPIFIDGETAGITKESSYNRVRFFLES LKDLDR  
QLRAKKGKLHFIKGD PVKVFEA IHNIVPLELVSFEQDPEPMWESRDSKAKAYFDQHTIKWTEEISHTLWNPLD  
IIKANGGV PPLTYEMFLHILSVVGDP RPVEDPEWEGVKFGFLPLNIGNEVT VYHSIPTPEQLGYLQTRSSDQ  
QINRWIGGEQTALIKLQDR LKVEERAFLDGIYLPNQARPNLLGPSSQSAALSFGCLSIRKIFYWAVHDMFNKI

YLGHTQLNQSITGQFIWREFFYTMSIKNPYYGEMERNPLCLNLPWTKNREDLAKKWENGLTGYPFIDAVMRQL  
HQEGWVHHVARNACFLTRGDLWISWEVGLRLFLRLLLDADWSLCAGNWMWVSSSAFEQLLDSCSSCVCVNY  
GRRDPQGEYIRRYIPELRNYPYIEYLYEPWKAPLKVQEMAGCYIGQEYPERIVDHAVVSEKNRKMENIRLTL  
VEESTPHCCPSNEEEVRQFMWLPESCSDYLCANRK

>Fulmarus\_glac\_\_KFV89387.1

RFLQLQCLELDANLRKLNLSRLFVIRGQPADVFPRLFKEWNIAKLSIEYDSEPFQKERDAAIKKLASEAGVEVI  
VRISHTLYDLDKIIELNGGQPPLTYKRFQTLISRMEPLEMPVETITPEVMEKCTTPVSDDHDEKYGVPSLEEL  
GFDTDGLPSAVWPGGETEALTRLERHLERKAWVANFERPRMNANSLASPTGLSPYLRFGCLSCRLFYFKLTD  
LYKKVKKNSSPPLSLYGQLLWREFFYTAATNNPRFDMEGNPICVQIPWDRNPEALAKWAEGRGTFPWIDAIM  
TQLRQEGWIHHLARHAVACFLTRGDLWISWEEGMKVFEELLLDADWSVNAGSWMWLSCSSFFQQFFHCYCPVG  
FGRRTDPNGDIIRRYLPVLRGFPKYYIDPWNAPESVQKAAKCIIGVNYPKPMVNHAASRLNIERMKQIYQQ  
LSRYRGLGLLATVPSNPSGNGGGLMGYSPEGESISGCGSTGAQLGTGDGHTVVQPCALGDSHTGASGIQQQGY  
CQASSILHYAHGDNQQSHLLQAGRTALGTGISAGKRPNPEEETQSVGPKVQRQSTN

>Fulmarus\_glac\_\_KFW08398.1

DNWAFLYAQRALKQELPLHVCFLVPKFLDATIRHYGFMLRGLQEVAKECTELNIPFHLLLGyakDVLPAFV  
VEHGVGGLVTDfCPLRLPRQWVEDVREQLPDDVPFAQVDAHNIVPCWIASPKQYEGARTIRGKIHAQLPEFLT  
EFPPVIRHPYLPSCPAEPIAWEACYSSLQVDRTVKEVEWATPGTAAGLAVLQSFIVERLKSFGSHRNDPNKAA  
LSNLSPWFHFGQVSTQRAILEVQKHrgkyKESVDAFVEEAVVRRELAENFCYYNENYDSVQGayDWAQTTLKL  
HAKDKRPFLYDLQELEQGTTHDPLWNAQRQMVQEGKMHGFLRMYWAKKILEWTRSPEEALRFaiYLNDRYEL  
DGRDPNGYVGKLQDRERAIFGKIRYMNyTGCKRKFDVGQFERRYAP

>Fulmarus\_glac\_\_KFW11500.1

HLAYFVPRIIElNGHKPPLTYKRFQAIISRMELPKKPVSTVMSQQMETCKVDIQENHDDVYGVPSLEELGFPT  
DGLAPAVWQGGETEALARLDKHLERKAWVANYERPRMNANSLASPTGLSPYLRFGCLSCRLFYRLWELYKK  
VKRNSTPPLSLYGQLLWREFFYTAATNNPKFDRMEGNPICIQIPWDRNPEALAKWAEKGTGFPWIDAIMTQLR  
QEGWIHHLARHAVACFLTRGDLWISWESGVRVFEELLLDADFVNAGSWMWLSCSAFFQQFFHCYCPVGFGRR  
TDPsGDYVKRYLPKLKGFPsRYIYEPWNAPESVQKAAKCIIGVDYPKPMVNHAETSRLNIERMKQIYQQLSRY  
RGLCLLASVPSCVEDLSGPVADSASGQGCSTSTAMRLSQADQASPKRKHEGAEElCTEELYKRAKVTCLPAPE  
IPGKS

>Fulmarus\_glac\_\_XP\_009574953.1

VLHWAQSNADFVIPLYCFDPRHYLGTRCYGFPKTGPHRLKFLLESVKDLRETLKKKGSTLVVRKGKPEDVVCD  
LITQLGSVSAVAFHEEATQEELDVEKGLCQVCSQHGVKIQTfWASTLYHRDDLPRPIARLPDVYTHFRKAVE  
SEVKVRPTLCVADQLKPLAPGVEEGRIPTMEDLGQKDPVTDPRTAfPCSGGETQALMRLQYYfWDTNLVASYK  
ETRNELVGMdYSTKFAPWLALGCISPRYVYEIQIkyEKERAANQSTYWVLFELLWRDYFRFVALKYGKRIFSL  
RGLQSKEVPWKKDLQLFDcWKEGKTGVPFVDANMRELAATGFMSNRGRQNVASFLTKDLGLDWRMGAEWFEYL  
LVDYDICSnyGNWLYSAGIGNDPRDNRKFNMIKQSLDYDNGGDYVRLWVPELQAIKGADIHTPWALNSAALSQ  
AGVTlGETYPQPVVTAPEWSRHISQRPQGRSPHPRGRGPAHTPVQHKDRGIDFYfSRKKDI

>Fulmarus\_glac\_\_XP\_009575143.1

RCRPPDLGLAECYRVPLPVDLKIppESLSPWRGGETEGLQRLEQHLTDQGWVTSfTKPRTIPNSLLPSTTGLS  
PYfSLGCLSVRTFFYRLSNIYAQAKHHSLLPPVSLQGQLLWREFFYTVAATPNfTKMAGNPICLQISWYEDAE  
SLHKWkTAQTGFPWIDAIMTQLHQEGWIHHLARHAVACFLTRGDLWISWEEGMKVFEELLLDADYSINAGNWM  
WLSAFAFFHQYTRIFCPVRfGKRTDPEGQYIRKYLPIlKNfPSKYIYEPWTASEEEQKQAGCIIGQDYPFPMV  
NHKEASDHNlQLMKQVREEQYRTAQLTRDDTDPMEMKVKRdHSEENVSKGKVARMTEQTEIPSGITRGEpKN  
DKRGEPEAS

>Fulmarus\_glac\_\_XP\_009580326.1

TRLTFEVDTEPPAHRRTAVAElaARHGVEVIQEVSHtLYDTERWGRTGYPFIDAIMTQLRTEGWIHHLARHA  
VACFLTRGDLWVSWEEGLKVFEELLLDADWSLNAGNWLWLSGSAFFHRYfHVYSPIAFGKKTDrdGAYIRGGL  
PGGFDPSPXRAVQEAGCLVGTHYPRPIVEHGAASKRNLGRMKAAARQK

>Fundulus\_hete\_\_XP\_012708076.2

MGVNSIHwFRKGLRLHDNPALRDSIRGTGTLYCIYILDPWFAGSSSVGINRWRfLLHCLEDLDASLRKLNLSRL  
FVIRGQPTDVFPRLFRDwKITRLSYEYDPEPFQKERDAAIQKLASEAGVEVNVRIshTLYNLEKIIELNGGQP  
PLTYKRFQAVINRMDAvelPAETITSEIMKNCIPLVTDHDDKFGVPSLEELGFETEGlSTAVWPGGETEALR  
RLERHLERKAWVANFERPRMNNSLLATPTGLSPYLRFGCLSCRLFYFKLTDLYKKVKKNSTPPLSLYGQLLW  
REFFYTTATNNPCFDKMEGNPVCLQIPWDRNPEALAKWAEGRGTFPWIDAIMTQLRQEGWIHHLARHAVACFL  
TRGDLWISWEEGMKVFEELLLDADWSVNAGSWMWLSCSSFFQQFFHCYCPGTGFGRRTDPsGDYIRRYLPVLRG  
FPKYYIDPWNAPEEVQKAAKCIIGTDYPKPMVNHAASRLNIERMKQIYQQLSsyKGLGLLATVPVNGGVNT  
VSSQGPRGSFERPLLQEGTSQTVERRPSTQKRRHEETETECsFKSWKQSK

>Fundulus\_hete\_\_XP\_012722956.2

MVVNSVHWFRKGLRLHDNPALQEALSGADTVRCVYVLDPWfAGAAANVGINRWRfLLESLEDLDNSLKKLNLSRL  
FVVRGQPTeVFPRLFKEWNVTRLTFEYDPEPYGKERDGAIIKMAQEFgVETVVRNSHTLYNLDRiEMNNNNP  
PLTFKRFQsIVSRLELPRRPLAPIGQQQTNGCLGKISDNHDQLYSIPsLEELGFRTeGLPAAVWRGGESEALD

RLSRYLDKNVWVANTRAKTCSLYASPTGLSPYLRFGCLSCRVLYYNLREIYMKLCKRSSPPLSLYSQLLWREF  
FYTAATNNPNFDRMEGNPICVQIPWDQNPEALAKWAEGRTGFPWIDAIMTQLRQEGWIHHRARHAVACFLTRG  
DLWISWESGMKVFEELLLDADWSVNAGSWMWLSCSSFFQQFFHCYCPVGFGRRTDPSGDYIRRYVPILKDYPN  
RYIYEPWNAPESLQKAVNCVVGVDYPKPMINHAEGSRLNIERMKQVYQQLSHYRGLSLLASVPTIQEEAEPPM  
TDESQTSSGPDSPPRDLTEVEASGCSTAPDSSTSVTHPDQEDASHHHPFHYHCTSSGQPSSPNSSPAHSPAQQ  
AKPSPASSSCLFVAHKGRQSQRQRCQCCLAEIEEEERMQEVEVDEERMEEEEQTAALQQ

>Fundulus\_hete\_\_XP\_012724202.2

MAHVCIHWFRLGLRLHDNPALVYALKECKELYPVFILDPYLYNTQVGINRWRFLLGALKDLDLDCSLRKLNSRLF  
VLRGKPEDVFPKLFDFKWKVTKLTYEYDTEPYSLSRDEKVTSLAKEHGVDSYKISHTLYNTERIMEENDGKPP  
LTFKRLQAIQVQKLGPPKKPIPAPTLENMKDVETHCSEENEKKYGIPTAEELGLDLTSLGEELFPGGEQEALRR  
LDEHMKRTGWVCSFEKPQTSFNSLSPSTTVLSPYVTFGCLSARTFWWRLTEVYRGRKHSDPPVSLHGQLLWRE  
FFYTCSVGIPNFNKMEANPVCTQVDWDTNPECLAAREARTGFPFIDAIMTQLRQEGWIHHLARHAVACFLTR  
GDLWISWEEGEKVFEELLLDGDWALNAGNWQLSASAFFHQFFRVYSPVAFGKKTDKNGDYIKKYLPIILKKFP  
PQYIYEPWKAPRSVQQAAGCIVGKDYPHPIVQHEQISKKNIQRMKEAYAKRSSDSNESPSKKQGVKRKAPSVI  
DLLQKKKKRV

>Fundulus\_hete\_\_XP\_012735645.2

MSASRTVICLLRLTDLRLHDNELFHWQRNAEHIVPLYCFDPRHYVGTYNFMNPKTGPFRLRFLLESRLDLRAT  
LLTKGSNLVVRKGKPEEVVADLIKQLGSVSSVAFHEEVASEELTVEKKLKEVCAQLKVKVHTCWGSTLYHRED  
LPFPHISRLPDVYTEFRKAVESQSRVRPTLPTPERLSPLPPGLEEGAIPAEEDLQQTPEASDPRSAPPCSGGE  
SAALARLKHFWDTDAVATYKETRNGLIGVDYSTKFSPLALGCVSPRYIYHQVKYERERTANQSTYWVIFE  
LLWRDYFKFVGIKYGNKMFQVKGLQGKSVPWKMDTKLFDWKEGRTGVPFVDANMRELAQTGFMSNRGRQNV  
SFLTKDLGLDWRGAEWFEYLLIDHDVCSNYGNWLYSAGIGNDPRENKFNMIKQALDYDSNGEYVRRWVPEL  
GSIRGADVHTPWNLSAALSNAAGVSLGETYPSPVVTAPEWSRHFSSKKPSGAGPSTRGKKGPSHTPKQHRDRGI  
DFYFSRSKDL

>Fundulus\_hete\_\_XP\_012737566.2

MPPSAAGDQAAVRQMLREVLVGREDPEGFFAMCVSVLGHQETRSQFLAIKPLSTANIRLHSVLSALYQQYFS  
KPEDDELELALALSLEMKDNPMPTPNQSPLOPGIRDDPSSVLLSSKPKSQGRTCTQPQDVHCRGKSALPVQS  
SSKSKENLPETKTHKGLHVESADHQLGTSQDLRVPVSSASFVSNATSKSDQMMQEGDVNPSEKPRRPKSRR  
QRRKAAAQQIVGLACSPSAPPPVLLWFRDLRLCDNPALIRSELELGAPVIPVFIWCPEEEEGPGVTVMGGAC  
KYWLHQALSCFCASLEQIGSRLIFLKAGGEGNERSSLHTLTKTLVKETGAQTVLANALYEPWLKERDDVVLSA  
LRKEGIDCEMFHSYCLRDPFSVSTEGVGLRGIGSVSHFMSCCRQNPAGPAIGVPLDPPVSLPSPALWPQGVPM  
SLDLARMPPRRKDGTTIDWAANIRKSWDFSSEDGAHARLEAFHLDGVYRYEKESGRADAPNTSSLSPLYLHFGQLS  
PRWLLWDAKGARCRPPKFQKRLAWRDLAYWQLTLFPDLPWESLRPPYKALRWSTNRSHLKAWQKGKTGYPLVD  
AAMRQLWLGTGMNMYMRHVVASFLIAYLHLPWQEGYRWFQDTLVDADVAIDAMMWQNGGMCGLDHNWFVMHPI  
DAAMTCDPYGSYVRKWCPELAGLPDELIIHKPWACPASMLRRAGVAFGQTYPERIVTDLEERRSKSLQDVALVR  
KQFQQYVDKRSGLDLVPLPKRLVSKTLGLSHRDGAVVTEGKEFLLPVITRMEFKHQLEDPDADAASNPNYAVL  
KGYVSRKRDETI AFLNERDFTASVMYEGAQRQERLERDRRRMEGLPPAPSPRGRARRPTAKDKFSIVPGGAI  
ASTN

>Fundulus\_hete\_\_XP\_035993809.1

MLLAAWRRPSSISRFTAFTGGCPKFPPRPPCGSSPSAARSPLPRLAQLHGRAPGSSSLFFFFFFFSLPSTSS  
FSGSGSATMAEKKRKASSTAGGKEPGTKRPKLEKEKEKEEKAAGWLQSLVKQQREDKKDMKFNKKRQRVLSA  
AKIKQGSEGVLYWMLRDQRVQDNWALIRAQQLAAKEELPLHVCFCLLVPKSPLSTLRHYAFLKGLQEVAKEC  
KRLNVQFHLLHGAPGEVLPGFVSDQGFAGVVTDFSPLEPPQWLKDVKKKLSKDTPLIQVDAHNIVPCWVASP  
KLEYSARTIRGKITNLLPEFLTDFPVIEPHPHATRTAKPVDWEKTLASLDVDRTVGEPQWAKPGSDAGMAML  
ESFIDVRLKLFATQRNDPNMAALSQLSPIWIRFGQLSAQRVALQVRRCGKNASESVAPFIEELVVRRELTDNFC  
FYNEKYDKVEGAYEWAQKTLRDHAKDKRELYLTREQLEKAQTHDKLWNGAQYQMVTEGKMHGFLRMWAKKIL  
EWTRSPEEALSIALYLNDRYELDGQDPNGFVGCMMWSICGIHDQGWAEPRVFGKIRYMNYKGCLRKFNVAQFEK  
KYCPKKP

>Gadus\_morh\_\_XP\_030205469.1

MSARTVICLLRQDLRLHDHEVFDWAQSHAHIVPLYCFDPRHYLGTAVYNLPRTPGPFRLRFLLDLSIRDLRSAL  
LKKGSTLVVRRGRPEEVVADLVRSLPFVSAVVHFQEVASEERAVEQAVMEVCAQMKVKVHTCWGSTLYHRDDL  
PFPPARLPDVYTQFRKAVETQSRVRPLFLSPDQVRPLPPGLEEGDVPTLEELGQTEPVSDPRSAPPCSGGESQ  
VLARLKHFWDTDSVASYKETRNGLVGVDYSTKFSPLALGCLSPRYIYHQVRQYERERTANQSTYWVIFELL  
WRDYFKFVGKYGKGNRLFHLKGLQDKSVPWKKDMTLYNAWKDGRGTGIPFVDANMREAMTGFMSNRGRQNVASF  
LTKDLGLDWRMGAEWFEYLLVDHDVCSNYGNWLYSAGLGNDPRENKFNMIKQGLDYDADGDYVRRWVPELQ  
LGGEVHAPWNLGPSALNHAQVTLGTSYPHPVMAPEWSRHTGRKAGGRQSDSCPSARGKKGPSHTPKQHKDR  
GIDFYFSKSKNL

>Gadus\_morh\_\_XP\_030209048.1

MVVNTIHWFRKGLRLHDNPALEDICIQGADTVRCVYILDPWFAGSSNVGISRWRFLQLQSLQDLASLRKLNSRL  
FVIRGQPTDVFPRLFKEWEIRRLSYEYDSEFPFGTERDAAIKKLASEAGVEVTARISHTLYDLDRIIELNGGQS

PLTYKRFQTLISRMAPVEVPADAISSTWKCSTPLADDHDDKFGVPSLEELGFDTEGLLSAVWPGGETEALTRL  
ERHLERKAWVANFERPRMNANSLASPTGLSPYLRFGCLSCRLFYFKLTDLYHKVKNSSPPLSLYGQLLWRE  
FFYTAATNNPSFDKMEGNPICMQIPWDRNAEALAKWAEQGTFGPWIDAIMTQLRQEGWIHHLARHAVACFLTR  
GDLWVSWEEGMKVFEELLLDADWSVNAGSWMWLSCSSFFQQFFHCYCPVGFGRRTDPNGDYIRRYIPILKGFP  
AKYIYDPWNAPESVQKAAKCI VGVHYPKPMVNHAEASRLNIERMKQIYQQLTCCRGLGLLAAPVSSATGGSEA  
ASGLLGFTVEGAHGASTPSGYQSAVTPSQGDWQSAVMTYSQDEAQSTSGPQQTAPGYSPGSSLMYYTPPALP  
AVTQGVNRNPLQTSQKRPSEDHGAGTGSKVPRQCSH

>Gadus\_morh\_\_XP\_030219084.1

MASNKRKAASSAKPPAAKKQKPAPFKLRRGRGWAGWXKMWPNKEERPDLSCNPKRIRFISDTQSIKHGCEGI  
LYWMSRDHRIQDNWALIHAQQQLAVEEKLPLHICVCLLVPKSELSTLRHYNFMLKGLEEVAKECKELDIQFHLL  
RGAPGEVLPGFVSDHGLGVVVTDFSPLSRPLKALESRLKSLPEDIPLIQVDAHNIIVPCWVASIKLEYAARTIR  
GKITKLLPEFLTEFPVVRKHSYTATRPAPKVDWSEALGSLQLDRTVGEVDWALPGSAAGSAMLESFIDLRLKH  
FANHRNDPNSAALSQSLSPWIRFGHLSAQRAALQVQRCGKAFSESVAPFIEELVVRRELTNDNYCFYNDNYDNIK  
GAYEWAQKTLKDHAADKREYLYTQADLEKAKTHDKLWNGAQYQMVSEGKMHGFLRMYWAKKILEWTSSPEQAL  
SIALYLNDRYSLDGQDPNGFVGCMWSICGVHDQGWAEARAVFGKIRFMNYKGCLRKFVAKFETKYCPKKL

>Gadus\_morh\_\_XP\_030221581.1

MNVKRTIAGAADNIASLSNTLQQLVLGGEDPGGFFGICVSSMGHSETLSVFPSLIQPLASVDPSQHSTLIAIY  
VEYFSKDEEDELVALALSLLDVKPQQKPACRPEPRPPVWQGGYPKAVGGSIPGGATKSKTTTTLPGLSYAQSA  
ATGGRGRRPSENLPKTGSGVPSSTPPTHPSRGRAPLPTDTHSTTSQTTRHKHVPGLPAPPTFHQSDRRQDAVN  
DDARDPLDTEGTCPDQSQPKPKRSKNRRQRGKGCQRAVVGLPHSPSATPPVLLWLRRDLRLHDNPALIGSLQA  
GAPVVPVFIWSPEEEEGPGVTMATGGACRYWLHQALACLQALQLLGSHLVLLKADPGSSSLGALLGLVGETGA  
RTVLATALYEPWLRERDQVEAGLRAGVAWRMVHSYCLRDPYSVSTQGVGLRGLGSVSHFISCCQNPGPAL  
GPSLDPVSMPTPSQWPPGDPLDALGLARMPRRKDGTVIDWAANIRASWDFSEQGAHARLEAFLQDGVYRYEK  
ESGRADSPNTSCLSPYLHWGQISPRWLLWDAKSARCRPQKFQRKLAWRDLAYWQLSLFPALPWESLRPAYKAL  
RWSSDRGHLKAWQRGRTGYPLVDAAMRQLWLTGWVNNYMRHVVASFLIAYLHLPWQEGYLWFQDTLLDADVAI  
DAMMWQNGGMCGLDHNFMVHPVDAALTCDPGGSYVRKWCPELAALPDDI IHKPWRCPASILRRAGVAFGHTY  
PEPIVTDLEARRGQSLQDVAQVRSTLSEYVDERSGCDLVPLPRLVAEALGSAGGDQLRTGGEQFLLPVITRM  
EFKHRRGDPGEDAASNPHYDAVLKGYVNRKRDETVAFLNQRD FSASVMNEGAQRRERLSDMRILEGLPRAPPG  
RGRARPTPAAQGQTS

>Gadus\_morh\_\_XP\_030222357.1

MVVNSVHWRKGLRLHDNPQLQALNGADTVCCVYILDPWFAGSANVGVNRRWFLLESLEDLNNSLRKLNSRL  
FVVRGQPTDVLPRLFKEWNVTRLTFEYDPEPYGKERDGA I KVAHEMGVETIVRNLHTLYNLDR I IEMNNNSA  
PLTFKRFQTI VNRDLPRRPLPTVTPQQMERCKTLIAKDHDQHSVPSLEELGFKTEGLPPAVWRGGESEALE  
RLNKHLDRAKAWVANFEHPRGVC SLFASPAGLSPLFRFGCLSCRVFYYNLRELYMKLRKRCSPPLSLFGQLLWR  
EFFYTAATINPNFDRMEGNPICVQIPWDQNPEALAKWAEGRGTGPWIDAIMTQLRQEGWIHHLARHAVACFLT  
RGDLWISWESGMKVFEELLLDADWSVNAGSWMWLSCSAFFQQFFHCYCPVGFGRRTDPNGDYIRHYIPILKDY  
PNRYIYEPWNAPLSVQKAAHCVGVDPYKPMINHAASRLNIERMKQVYQQLSHYRGLSLLASVPTIQEEAEP  
PMTDESQTSSGPDSPVHEPAACPLVPDSSRACMSSPAPGLNVSAHTPSTSTREQAGVGAAAPPQAYASTSTD  
PSTFPVLSSAAAITKLSIDVPAAVFLHPPPIPFSSNPATGQTPARDPASSPASPNLSPASKPFRALSPRPVT  
LAGHHAPLLGQRKKGPLRKHRRSQRARGVPGVPGPPVEGGKAMDGAGGEGEECWREECMDDEMIQDSPNDQQ

>Gadus\_morh\_\_XP\_030233389.1

MAHVCIHWRKGLRLHDNPALMSALRGCKEIIYPLFILDPCIHNKESMGVNPWRFLMGSLOLDGSLRKLNLRL  
FVVRGKPDILPRLFQKWGVSMTYEDTEPYRSRDLKVSELAKEHGVEVVYKISHTLHDVDRI I EENNGKA  
PLTYGRFQTVLKTGLPPKRP I PSPTVEDIKDVKAPCVESHEEQQYGLPSLEELGHDLSCLQEAQFPGGEEEA  
RRLEESMERTGWVCSFEKPQTAPNSLSPSTTVLSPYLTFGCLSARTFWWRADVYQGKKHSAPPVSLHGQLLW  
REFFYTASVGVPNFDRMLDNPVCTQIDWDTNPEYLSAWKEARTGFPFIDAIMTQLRREGWIHHLARHAVACFL  
TRGDLWISWEEGKKVFEGLLLDGDWALNAGNWLWLSASAFFHQYFRVYSPIAFGKKTDKHGEYIKKYLPLVKK  
FPVEYIYEPWKAPLSVQKAAKCI VGVHYPKPMVNHAEASRLNIERMKQIYQQLTCCRGLGLLAAPVSSATGGSEA  
VLDMLKNKKKK

>Galbula\_dea\_\_NXI34715.1

MPHHTIHLFRKGLRLHDNPALLAALLESSELYPLYILDRQLITSAMHMGALRWHFLLQSLEDLQSRSLCQLGSC  
LLVIQGEYESVLRDCVQEWHTQVTLDEDLEPFYKEMEAKIRSLGEELGFEVLSRVGHTLYDTRRILDLNGGA  
PPLTYKRFQTLVLAQLGDPEVPVREPTAEDFQRCQPPDLGLAERYRVPLPGDLELTPESPSPWRGGETEGLQRL  
EQHLTEQGWRVSFTKPTIPNSLLPSTTGLSPYFSMGCLSARSFFHRLANICAQAKHSLPPVSLQGQLLWRE  
FFYTASVTPNFTRMAGNPICLQISWCEDAERLHRWKMAQTGPWIDAIMTQLRQEGWIHHLARHAVACFLTR  
GDLWISWEEGMKVFEELLLDADYSINAGNWMWL SASAFFHHYTRIFCPVRFGRRTDPEGHYIRKYLPLVQNFA  
SKYIHEPWTAPEEEQKQAGCII GQDYFPFPMVNHKEASEHNLQLMKQVREEQYRTAQLTR

>Galbula\_dea\_\_NXI35518.1

CIYILDPWF AASSAVGINRWRFLQSLLEDLNSLRKLNSRLFVVRGQPTDVFPRLFKWGVTRLTFEYDSEPF  
GKERDAAIVKLAKEAGVEVVIENSHTLYDLDR I IELNGHKPPLTYKRFQAIISRME LPPKPVSTVTTQQMEAC

KVDIQENHDDMYGVPSLEELGFPTDGLAPAVWQGGETEALARLDKHLERKAWVANYERPRMNANSLLASPTGL  
SPYLRFGCLSCRLFYRLWELYKKVKRNSTPPLSLYGQLLWREFFYTAATNNPKFDRMEGNPICIQIPWDRNP  
EALAKWAEGKTGFPPWIDAIMTQLRQEGWIHHLARHAVACFLTRGDLWISWESGVRVFDLLELDADFSVNAGSW  
MWLSCSAFFQQFFHCYCPVGFGRRTDPSGDYVKRYLPKLKGFPSRYIYEPWNAPESVQKAAKCIIGVDYPKPM  
VNHAETSRLNIERMKQIYQQLSRYRGLCLLASVPSCVEDLSGPVTDASGQGCSTSTAIRLAQADQASPKRKH  
EGAEELCTEELYKRAKVTSLPAPEIPGKS  
>Galbula\_dea\_\_NXI41525.1  
VDYDVCSNYGNWLYSAGVGNDPRGSRKFNVMVKQGLDYGNGDYIRLWIPELQGLKGADIHTPWALNSAALSQA  
GVTLGQTYPPQPVVTAPEWNRHISQRPQGRSSQPRGRRGPAHTALQHKDRGIDFYFSHKKD  
>Galbula\_dea\_\_NXI42337.1  
RFLQCLELDANLRKLNRLFVIRGQPADVFPRLFKWKIAKLSIEYDSEFPFGKERDAAIKKLASEAGVEVI  
VRISHTLYDLKIIELNGGQPPLTYKRFQTLISRMEPLEMPVETITPEVMEKCTTPVSDDHDEKYGVPSLEEL  
GFDTDGLPSAVWPGGETEALTRLERHLERKAWVANFERPRMNANSLLASPTGLSPYLRFGCLSCRLFYFKLTD  
LYKKVKKNSSPPLSLYGQLLWREFFYTAATNNPRFDKMEGNPICVQIPWDKNPEALAKWAEGRTGFPPWIDAIM  
TQLRQEGWIHHLARHAVACFLTRGDLWISWEEGMKVFEELLLDADWSVNAGSWMWLSCSSFFQQFFHCYCPVG  
FGRRTDPNGDIYIRYLPVLRGFPKYYIDPWNAPESVQKAAKCIIGVNYPKPMVNHAEEASRLNIERMKQIYQQ  
LSRYRGLGLLATVPSNPNGNGGLMSYSPGENISGCGNTGGAQLGTGDGHTVVQPCALGDTHTGASGIQQQG  
YCQASSILHYAHGDNQQSHLLQAGRTALGTGISAGKRPNPEEEIQSVGPKVQRQSTN  
>Galbula\_dea\_\_NXI43595.1  
DNWAFLYAQRALALKQELPLHICFCLVPKFLDATIRHYGFMLKGLQEVAKCEAELNIPFHLLLGyakDVLPTFV  
VEHGVGGLVTDfCPLRLPRKWVEDVREQLPEDVPFAQVDAHNIVPCWVTSQKQEYSARTIRGKIHAQLPEFLT  
EFPFVICHPPYPPSCPAEPIAWEACYSSLQVDRTVKEVEWATPGTAAGLAVLRSFITERLKSFGSHRNNPNKAA  
LSNLSPWFFHFGQVSTQRAILEVQKQRSKYKESVDAFVEEA VVRRELAENFCYYNENYDSVQGAYNWAQTTLKL  
HAKDKRPFLYELQELEQGTTHDPLWNAQLQMVWEGKMHGFLRMYWAKKILEWTCSPKEALRIAIYLNDRYEL  
DGRDPNGYVGKLQDRGMGWWGCLWSICGVHDHGWAERAIFGKIRYMNYAGCKRKFDVGQFERRYTP  
>Galdieria\_sul\_cryDASH\_fa\_XP\_005708318.1  
MSAFATLNCKYDNYFRNIKGYSFQKRSTYVKLTRGNSSLFWRKQIREAKVFRLYSKIRGDLHRVPESLNGG  
TAILWFRNNRLSDNSCLDLANTAEAVLPLYVFDKRSILVRNRLKQQRGCPFRYSFVKESVEQLQNNLRGLFSD  
LLVEVGTAAEVIRELCAKYSINHIVAPKMIKVSQVATELHLNACFVWDCTLLSFDELIVNEYQHSFETFYNSV  
ISKGLPKIFELDNSQRPLKPLPFGYKPSFAIPLPHLVNDLGVENLCTPYEWPFPPEPRAVYPFRGGEDSAKER  
LTDYFVKKNGLQLIADLENYSGVMDSSSTKLSPWISIGCVSVRQVYEWEGYRSYMKNMDSQVANLWLKRFLWRDF  
LYLLCLQEGSAVFRDRTVNEDAPEFPLYKQSATPYETICNQAIQTWLEGRTGYPIYDAHIKELITGTGYSIFRG  
RLNVSSFLVHELDGIWQLGAEFFEHYLDHDPVINWGYWYHLYEKKQIGVESIQVDTIEEANKYDPDGFYVKK  
WLNQLVLLPPPFCHPEYLLSEEEQNQFQVILGSDYPEPVLFPPTVSEEIERARQFLSSSS  
>Galdieria\_sulph\_XP\_005706429.1  
MKTTEGSPVAILSFVSHIGFSVCKISLSCKHSVTLLPCTKNGQRLTLGGRRSKAKGYERIVATGTDALSFAS  
PEQTKQPKNHKSDNQRLKTAFLFSPNGENFGESAGQAYKGSKIIVWFRNDLRLHDNPALFRAAEEGSLILPV  
YCFDPRQFGKTSFGFEKTGRYRAQFLIDSVEDLRKSFRAGKSDLIVRLGRPEEVLPELQRTGCKRVFCHREV  
TYEDLIVEEDVGDALESIGVEMTLLWSNTLYQAEDLPFQVENMPDIYTKFRESVETGGKIREPLELSEAFPPR  
PRCEPGEIPTLTELGLDASPERIPGESNPRS IHGFRGGESESLKRMEDYLSEMRSTEISSTTAGAYLGADFSC  
KISPWALALGCISPRKIYHEVNGSSVPEDVRKTTYFELVWRDFFRFITQKYGNIRLEKSRHSSSSSKRKVPsgNQ  
FVATCG  
>Galdieria\_sul\_XP\_005703413.1\_photolyase  
MNCpVSNQRVRVLNNKpVQESREFVLYWMQAAVRLTYNYALQYAVFSANQLGKPLLICFGLTESFPEANARHY  
AFLLEGLQDVQRQLAERKLSMVVFHSEPEQMVEKLFHKAVQVVDMNYLRVTKNWRQVRASNIDCSFIQVETE  
CVVPVELVTDKEEYAARTIRPKLWKHANKFLIPWADTIHVENQLVDIPQIDELTVLDLQGEAKELVERLNVDK  
TVPPVSHFVGGETEAKRRLAEFCRSKLRDYEKKRNDPSLNCgKVFLVFCWRAKYLCLVSHMSPYLHFGHIS  
PVEIVCQVQQAASKTCKDAFIEEVFIRRELSNFNCYCDKYDAFDCLPTWAKQTMSEHSKDPRQFSYTLQQL  
ETAVTHDPYWNAAQLEMVQTGKMHNMYMRMYWGKKVIEWTNPPEEAFRILLYLNKNKYELDGRDPNSFTGVAWCF  
GKHDRAMERPITGKLRYSAEGLRRKFNIESYVRQYLTNSQNKILSVFYGNNNNNNNPHKRKRRTTK  
>Galdieria\_sul\_XP\_005706285.1\_photolyase  
MAIPSLKQWRNILFAFHND CSPSCNTPRARTLLASHIQKHIHMDTGTHIKGPTIVWFRKSLRLHDNP TLQR  
AVQLASELFLFILDPYYINPDKIGFQRFMRMLECMKDLHDHSLRKYQSKLLVIYGEPVNVLENCKT WKCSYL  
CFEKSDIYSRNRDEKVLQRMKGLGVQCFVESGHTLYDLDMVLAKLNGNSPTQMTSFLKFIEQIGPPPKPIE  
TVRNIPPLRKELLSSISISKVPEIEEIPGYELITEPTPCPFQGGESKALERMQQALNREQGWIVRFSKPHTS  
PVSLDPPSTTVLSPYIKCGALSVRLFFWELKRVEDSFSVKT KPPVSLIGQLYWREHFYLLGYTIPHFDQIQGN  
PLCKTIPWEHRQEWFAQWEQAQTGYPFIDAAMTQLKQWGLHHLTRHVACFLTRGDLWISWEEKGETFEKYL  
IDGDWSINAANWMLSCSAFFTRYFRVYSPIAFPKKYDPHGNYIRYFLPVLRNMPNKYIYEPWKAPLKVQKEV  
NCILGKDYPLPIVDHEEMKKRNIQKMIQVFQNKs  
>Galdieria\_sul\_XP\_005707133.1\_photolyase

MWLSSERKVTKKKRYKNATYTTQLVEHIEGTLTMEVNNNLNSIMSSEEEECNSPAKKSHGNRVSKSKQESCKD  
PEMISYGDShKLDIQSSVKAQVQIESAGTGQRESSLVWFRGHDLRLDDNPALLAALERKTKCYAIFLWSPNSF  
GRWYPSKPWLWWLRSSLLVLERELIKLGVKLLCRNGLAEELPSVVREIGATVIFWNRAYEPIYLKAEERVIS  
MFSGSTVKLVSFKSELFVEPWELQNDHSPFFPDFHSYMRWMLQLPPPEPLSISKQYCTSLPYTELENQVGQL  
DLLSKEDIEAFESKNNWKPGRQAQRTLKAFLSDSFDKFGAARYRRSLTGTSKLSPHLKFGELSVKRIFYMVR  
KRVANNRENWYLYSQAAKAFLKNLCLREYAYHILYYPNAIDTPLQSVFNLFPWERDYSLLDRWSVGHTGYPM  
VDAAIRELSTGWIHNILRFLASFLTRYLLLPWQLGAHFLYSHLIDGDLAANTLGWQWTAGCNTDSFPLSCL  
VNPIMGGRKYDSSGTYVRQWIPELASLQDKYIHCPWQAPEDVLANANITLGKTYPFPIVDVSFARSRAKEALR  
IMRQVVDGQHLPKSLSSPTVNDVIEEWPDEEIGEESNRMLEETSMTEQGSSALSLLPSLWQLLQYDSPPSLPV  
SSLEHLLFNSENEDELMLNDLSFQKEDETAIFYHLESRDDSSSYMTNKLQDLTAAQSNISNFVGSYSPSMGQQ  
HVSQVFLPTWMSTPYSAQERRSYSEDVHLETAVYAQN NFHRRIPSAETNLNYLYQPFLLDNSTQETVHMGPFYG  
NPVSHKLESYPSEHRMTDVS PSSSMLTFPSTKRKV KATAHSSAPMEESTQKWN DISSHPD DSPEI ITINMEGM  
QESRRETTGTTKRVRQTQLKRKQLMTAHSSHNRTSLSQKTSSSDWRQPPQTSEERRAMLEIVAKDNQHEGQLF  
AQFLLQYYELTDNVDRISRDFVRVRNMKDLFHQWCPDKKLLKIYKIKSFLSDILNLEVTGEWDRHLHGVR  
GPYVYGICPVEQKEQTMEAP

>Galemys\_pyre\_\_KAG8513992.1

FLLQCLEDLDANLRKLNSRLFVIRGQPADVFPRFLFKEWNITKLSIEYDSEPFGERDAAIKKLATEAGVEVIV  
RISHTLYDLDKIIELNGGQPPLTYKRFQTLISKMEPLEIPVETITSEVIEKCITPLSDDHDEKYGVPSLEELG  
FDTDGLSSAVWPGGETEALTRLERHLERKAWVANFERPRMNANSLASPTGLSPYLRFGLCLSCRLFFYFKLTDL  
YKKVKKNSSPPLSLYGQLLWREFFYTAATNNPRFDKMEGNPICVQIPWDKNPEALAKWAEGRGTGFPWIDAIMT  
QLRQEGWIHHLARHAVACFLTRGDLWISWEEGMKVFEELLLDADWSINAGSWMWLSCSSFFQQFFHCYCPVGF  
GRRTPNGDYIRRYLPVLRGFPKYIYDPWNAPEGIQKVAKCLIGVNYPKPMVNHAASRLNIERMKQIYQQQL  
SRYRGLGLLASVPSNPNGNGGLMGYSPGENIPGSSSSGSCPQSGSILHYAHGDSQQTHLLKQGRSSLGTGLSS  
GKRPSQDEDTQSPKVQRQSTN

>Galemys\_pyre\_\_KAG8519553.1

GRSGSGPGVEAAMATAVVTAATA SAPAPLADGASSVHWFRKGLRLHDPALLAAVRGARCVRVCVYILD PWFA  
ASSSVGINRWRFLQLSLEDLDTSLRKLNSRLFVVRGQPADVFPRFLFKEWGVTRLTFEYDSEPFGERDAAIMK  
MAKEAGVEVVTENSHTLYDLDRIIELNGQKPPLTYKRFQAIISLMELPKKPVGSVTSQQMEGCRAEIQENHDE  
TYGVPSLEELGFPTEGLGPAVWQGGETEALARLDKHLERKAWVANYERPRMNANSLASPTGLSPYLRFGLCL  
CRLFFYYRLWDLYKKVKRNSTPPLSLFGQLLWREFFYTAATNNPRFDRMEGNPICIQIPWDRNPEALAKWAEKG  
TGFPWIDAIMTQLRQEGWIHHLARHAVACFLTRGDLWVSWESGVRVFDLLEDADFSVNAGSWMWLSCSAFFQ  
QFFHCYCPVGFGRRTDPGSDYVRRYLPKLKGFP SRYIYEPWNAPE SIQKAAKCIIGVDYPRPIVNHAE TSRLN  
IERMKQIYQQLSRYRGLCKQPLPTSGPHPCTPRHPPQPTGKKGLLASVPACTEDLSNPVAEPSSSQAGSTSS  
AGPRPLPSGAASPKRKLEAAEPPGEELSKRARVAGLPAPAEAPSKDV

>Galendromus\_occ\_XP\_028966480.1\_photolyase

MRLSISALYLRLRILYSSKMPKTDERTAVNHFHEHEKNILYLMRRDKRIFDNHCVELGFKLSYKSKTKFYTGVE  
FSKLKINERQKTFVIEGLQEMEEACREHNIYFDLIDNLEKFVEKRDIDCIIMDFSPLRECEAYRNEVEEMCSD  
KELSLYVVDANMVPCKLLDVYKRTSKAVKIQLFNHWDDYLSDFKPLEKHLYNKKSETSTQSNDFPKKS VKNI  
FKGGYSHGMDTVEHFFDKKFAIYAKNRNPNPDVDALSNLSPWISSGQISSQKVIYLATKRF GKKNENYISFINE  
IFAVKENSEHFCLHEKNYDNIDGALQWAKDSLNLHRNDKRERYDLETLEMGKTKDQAWNAAQRQLLAEGKLH  
GYCRMWAKQLLKWTKTPEEAIKTACYLNDTFAIDGNCPNGFLGPMWSICGSMDQGFKERPVTGKIRPMNAFK  
APLYISKWSNYS PSSSKSSSTSSSSSK

>Galeopterus\_vari\_\_XP\_008561553.1

FLLQCLEDLDANLRKLNSRLFVIRGQPADVFPRFLFKEWDITKLSIEYDSEPFGERDAAIKKLATEAGVEVIV  
RISHTLYDLDKIIELNGGQPPLTYKRFQTLISKMEPLEIPVETITSEVIEKCTTPLSDDHDEKYGVPSLEELG  
FDTDGLSSAVWPGGETEALTRLERHLERKAWVANFERPRMNANSLASPTGLSPYLRFGLCLSCRLFFYFKLTDL  
YKKVKKNSSPPLSLYGQLLWREFFYTAATNNPRFDKMEGNPICVQIPWDKNPEALAKWAEGRGTGFPWIDAIMT  
QLRQEGWIHHLARHAVACFLTRGDLWISWEEGMKVFEELLLDADWSINAGSWMWLSCSSFFQQFFHCYCPVGF  
GRRTPNGDYIRRYLPVLRGFPKYIYDPWNAPEGIQKVAKCLIGVNYPKPMVNHAASRLNIERMKQIYQQQL  
SRYRGLGLLASVPSNPNGNGGFMGYSPGENIPGCSNSGSCSQSGSILHYAHGDCQQSHLLKQGRSSTGTSLSS  
GKRPSQEEDTQSIGPKVQRQSAN

>Galeopterus\_vari\_\_XP\_008568740.1

MGGAGGASRGAEVAGVVSSVMAAAVMTAAAAPAPAPAAGADGASSVHWFRKGLRLHDPALLAAMRGARCV  
RCVYILD PWFAASSSVGINRWRFLQLSLEDLDTSLRKLNSRLFVVRGQPADVFPRFLFKEWGVTRLTFEYDSE  
PFGERDAAIMKMAKEAGVEVVTENSHTLYDLDRIIELNGQKPPLTYKRFQAIISRMELPKKPVGLMTCQQMDS  
CRAEIQENHDETYGVPSLEELGFPTEGLGPSVWQGGETEALARLDKHLERKAWVANYERPRMNATSLASPTG  
LSPYLRFGLCLSCRLFFYYRLWDLYKKVKRNSTPPLSLFGQLLWREFFYTAATNNPRFDRMEGNPICIQIPWDRN  
PEALAKWAEGKTGFPWIDAIMTQLRQEGWIHHLARHAVACFLTRGDLWVSWESGVRVFDLLEDADFSVNAGS  
WMWLSCSAFFQQFFHCYCPVGFGRRTDPGSDYIRRYLPKLKGFP SRYIYEPWNAPE SIQKAAKCIIGVDYPRP

IVNHAETSRLNIERMKQIYQQLSRYRGLCLLASVPSCVEDLSHPVAEPSSSQPGSISSAGPRPVPSGPASPKR  
KLEAAEPPGEDLNKRARVAESPAPELPSKDV

>Gallus\_gallus\_NP\_989575.1\_cryptochro

MAAAASPGRGFCRSVHWFRRLHDNPALQAALRGAASLRICIYILDPWFAASSAVGINRWRFLQLSLEDLDN  
SLRKLNSRLFVVRGQPTDVFPRLFKEWGVTRLTFFEYDSEPFQGERDAAIKLAKEAGVEVVIENSHTLYDLDR  
IIELNNGKPLTYKRFQAIISRMELPKKPVSSIVSQQMETCKVDIQENHDDVYGVPSLEELGFPTDGLAPAVW  
QGGETEALARLDKHLERKAWVANYERPRMNANSLASPTGLSPYLRFGCLSCRLFYYRLWELYKKVKRNSTPP  
LSLYGQLLWREFFYTAATNNPKFDRMEGNPICIQIPWDKNPEALAKWAEGKTGFPPWIDAIMTQLRQEGWIHHL  
ARHAVACFLTRGDLWISWESGVRVFELELLDADFSVNAGSWMWLSCSAFFQQFFHCYCPVGFGRRTPDSGDYV  
KRYLPKLKGFPSRYIYEPWNAPESVQKAAKCIIGVDYPKPMVNHAETSRLNIERMKQIYQQLSRYRGLCLLAS  
VPSCVEDLSGPVTD SAPGQGSSTSTAVRLPQSDQASPKRKHEGAEELCTEELYKRAKVTGLPAPEIPGKSS

>Gallus\_gallus\_XP\_040508605.1\_cryptochro

MRHRTIHLFRKGLRLHDNPALLAALQSSEVVYPVYIILDRAFMTSSCLLVIQGEYKSVVRDHVQKWNITQVTLG  
AEMEPFYKEMEANIRGLGEELGFQVLSLMGHSLYNTQRILELNGGTPPLTYKRFLRILSLLGDPEVPVRNPTA  
EDFQRCSPPELGLAEYCVPLPTDLKIPPESSISPWRGGESEGLQRLAQHLADQGWASFTKPKTVPNSLLPST  
TGLSPYFSTGCLSVRSFFYRLSNIYAQAKHHSLLPVSLLQGQLLWREFFYTASATPNFTKMAGNPICLQIRWY  
EDAERLHKWKTAQTGFPPWIDAIMTQLRQEGWIHHLARHAAACFLTRGDLWISWEEGMKVFEELLLDADYSINA  
GNMMLSASAFFHHYTRIFCPVRFGRRTPDEGQYIRKYLPIKLNFPISKYIYEPWTASEEEQKQAGCIIGRDYP  
FPMVDHKEASDHNQLQMKQAREEQHRIAQLTRDDADDPMEMKLKRDHSEESLTKTKAARMTEQT

>Gallus\_gal\_NP\_989576.1\_cry-1

MGVNAVHWFRLKGLRLHDNPALRECIARGADTVRCVYIILDPWFAGSSNVGINRWRFLQLCLEDLDANLRKLNSRL  
FVIRGQPADVFPRLFKEWISAKLSIEYDSEPFQGERDAAIKKLASEAGVEVIVRISHTLYDLDKIIELNNGQP  
PLTYKRFQTLISRMELPEMPVETITPEVMQKCTTPVSDDHDEKYGVPSLEELGFDTDGLPSAVWPGGETEALT  
RLERHLERKAWVANFERPRMNANSLASPTGLSPYLRFGCLSCRLFYFKLTDLYKKVKKNSSPPLSLYQQLLW  
REFFYTATNNPRFDKMEGNPICVQIPWDKNPEALAKWAEGRTGFPPWIDAIMTQLRQEGWIHHLARHAVACFL  
TRGDLWISWEEGMKVFEELLLDADWSVNAGSWMWLSCSSFFQQFFHCYCPVGFGRRTPNGDYIRRYLPVLRG  
FPAKYIYDPWNAPESVQKAAKCVIGVNYPKPMVNHAEEASRLNIERMKQIYQQLSRYRGLGLLATVPSNPNGNG  
NGGLMSFSPGESISGCSSAGGAQLGTGDGQTVGVQTCALGDSHTGGSGVQQQGYCQASSILRYAHGDNQQSHL  
MQPGRASLGTGISAGKRPNPEEETQSVGPKVQRQSTN

>Gallus\_gal\_XP\_040534601.1\_photolyase

MPRGNGKGRKERDAGREEEEAAGTLEAAVREARRRTAPSVRDFRYNKQRRARLVSRGSELKEGAECILYWMCRD  
QRVQDNWAFLYAQRLALKQELPLRVCFCLVPAFLDATIRHYGFMLRGLREVAKECAELDIPFHVLLGCPKDV  
PSFVVEHGVGLVTDVDFCLRVPRQWVEEVKERLPEDVPFAQVDAHNIVPCWVASPKQEYSARTIRAKIHSQLP  
EFLTEFFPVIRHPHPPNPPEPIAWDACYSLLQVDRVTVEVAWATPGTAAGLAMLQSFITERLKSFGSQRNDP  
NKAALSNLSPWFHFGQVSTQRAILEVQKRRVYKESVDFAFVEEAVVRRELAENFCYNNENYDSVRGAYDWAQS  
TLKLHAKDKRPFYKLPQLEQATTHDPLWNAALQLMVREGKMHGFLRMYWAKKILEWTRSPPEALQFAIYLN  
RYELDGMDPNGYVGCLWSICGIHDQGWKERDVF GKIRYMNYAGCKRKFDDVQFERRYAHCK

>Gambusia\_affi\_PWA17548.1

MLPKDISTLSGTAAISRLVLKPPFFITQTRTAAPEMDQQPAEGSAGFWSSATTEQPSAGTPLLILLRFLNP  
SHLLTAPITAPRLARLPSQARRPKLSFASFGGATMSGKKRKAPTAEKGKPSAKQPKVEKAEGAAGWLQNLVK  
QOREDDKDKMFNKKRQRFLLTDEKIKQGGSEGLVYWMQRDQRVQDNWALIRAQQLAAKEELPLHVCFLVVPKS  
ELSTLRHYAFLKGLQEVAKDCKRLNVQFHLLRGAPGEVLPGFVSDRGLGAVVTDVDFSPREPQQWLNDVKKKL  
SKDIPLIQVDAHNIVPCWVASPKLEYSARTIRGITNLLPEFLTDVFPVEKHQQATATRTAKPVDWEETLASLD  
VDRTVGEQWATPGSEAGMAMLESFIDVRLKLFATQRNDPNMAALSQLSPWIRFGQLSAQRVALQVRRCGKNA  
SESVAAFIEELVVRRELTDFNFCFYNEKYDKVEGAYEWAQKTLKDHAKDKREHIYTREQLEKAQTHDKLWNGAQ  
YQMVAEGKMHGFLRMYWAKKILEWTRSPPEALSIALHLNDRYELDQDPNGFVGCMMWSICGIHDQGWAERPVF  
GKIRYMNYKGLRKFNVAQFERKYCPKKA

>Gambusia\_affi\_XP\_043953409.1

MAHVCIHWFRLKGLRLHDNPALMAALKDCKELYPVFILDPYLHHTQVGINRQRFLIGALKDLDCSLRKLNSRL  
VLRGKPEDVFPKLFNMWNVTKLTYEYDTEPYSLRRDEKVASLAKEHGVVDVIYKISHTLYNIERIIENNGKPP  
LTYKRLQAIQVTLGPPKKPIAPPTLENMRDVKTPHSEKYEDKYRIPTSEDLQLDSRFLGEELFPGGEQEALRR  
LDEHMKRTGWVCSFEKPKQTSFNSLSPSTTVLSPYITFGCLSAFTFWRLTEVYRGRKHSDPPVSLHGQLLWRE  
FFYTCSVGIPNFKMNQNPVCTQVDWDTNQNLAAWREARTGFPPIDAIMTQLRQEGWIHHLARHAVACFLTR  
GDLWISWEEGQKVFEDLLDGDWALNAGNWQLSASAFFHQFFRVYSPIAFGKKTDKNGDYIKKYLPLLKKFP  
PQYIYEPWKAPRSVQQAAGCIVGKDYPHPIVQHEQISKKNIQRMKEAYAKRSSDNNESPIKKQGVKRKTPSVI  
DMLQKKIRK

>Gambusia\_affi\_XP\_043961334.1

MSASRTVICLLRNDRLHDNEVLHWAQRNAEHIVPLYCFDPRHYVGTYNFNLPKTGPFRLRFLLESVLDLRNI  
LLSKGSNLVVRKGKPEEVVADLIKQLGSVSSVAFHEEVASEELNVENKVKEVCAQLKVKVHTCWGSTLFHRED  
LPFHHSRLPDVYTEFRKAVESQSRVRPVLTLPERLNPLPPGLEEGAIPTAEDLQQTEPVTDPRAFPCTGGE

SSALARIKHYFWDTDAVATYKETRNGLIGVDYSTKFSFWLALGCISPRYIYHQIKKYERERTANQSTYWVIFE  
LLWRDYFKFVGIKYGNKMFQVKGLQGKSI PWKMDTKLFDWKEGRTGVPFVDANMRELALTGFMSNRGRQNVA  
SFLTKDLGLDWRLGAEWFEYLLIDHDVCSNYGNWLYSAGIGNDPRENRFNMIKQALDYDNNGEYVRRWVPEL  
GSIRGADVHTPWNLSAALSHSGVSLGETYPNAIITAPEWSRHFSSKKPGGAGPSPRGRKGPSHTPKQHRDKGI  
DFYFSRSKNL

>Gambusia\_affi\_\_XP\_043966449.1

MAPNSIHWFRKGLRLHDNPALREAVRGAGTVRCVYFLDPWFAGSSNVGVNRWRFLQLCLEDLDASLRKLNSRL  
FVIRGQPANVPRLFKWKISRLTFEYDSEPFGKERDAAIKKLAMEAGVEVIVKISHTLYDLDKI IELNGGQP  
PLTYKRFQTLISRLDPPPEMPVETLSDALMGCCVTPVSEDHGEKYGVPSLEELGFDTGLPSAVWPGGETEALT  
RIERHLERKAWVANFERPRMNANSLASPTGLSPYLRFGCLSCRLFYFKLTDLYRKVKKNSSPPLSLYGQLLW  
REFFYTAATNNPRFDKMEGNPICVRIPWDKNPEALAKWAEAKTGFPWIDAIMTQLRQEGWIHHLARHAVACFL  
TRGDLWISWEEGMKVFEELLLDADWSVNAGSWMWLSCSSFFQQFFHCYCPVGFGRRTDPNGDFIRRYLPVLRG  
FPAKYIYDPWNAPESVQAAAKCIIGVHYPKPMVHAEASRLNIERMKQIYQQLSRYRGLGLLASVPSTNGNGN  
GMMAYSPGEQQSGTNSNNSHLPGVSGSSVATGNGSGSILFNFDNEEQTGPRSVGQQQQQRLHTLPQSQHQQQ  
HAGYHSVPDASQNITSSRLYHEFAVPQHPGLFLHTRGSGITGKRERESEREALGEEEPASCSVNMQRQSAET  
S

>Gambusia\_affi\_\_XP\_043980279.1

MPHSSAGDQAAVRQMLREVLVGREDPEGFFAMCVSILGHQETRSQFLSIIKPLSTANIRLHSLVSSIIYQEYFS  
KTEDDELELALALSLEMKDQQISTPNQLPPHPGVGNASSVLRNSNAKSQENGCTQQEDVPGREKSAFVAQS  
MSGSKENFQENQTYKSTYAEVVDNKSHGTSQPLYVSDSSTSFSMPNTASVSGQVMKEGVNLSSKKPRCSKNRR  
QRRKAAAQQIVGLTRSPSAPPPVLLWFRDLRLCDNPALIRCLELGAPAI PVFIWSPEEEEGSGVTLAMGGAC  
KYWLHQALSCFCASLERIGSHLIFLKASGEGNEDGSSLHTLKTLIKETGAQTVMANALYEPWLKERDDVVFS  
LQKEGVECKMFHSYCLRDPFSVSTEGVGLRGIGSVSHFMNCCRQNPNGASIGVPLDPPVSLPSPTCWPQGVPLD  
MLGLARMPRRKDGTTIDWAENIRKSWDFSEDGAHARLEAFLHDGVYRYEKESGRADAPNTSCLSPYLHFGQLS  
PRWLLWDAKGARCRPPKFQRLAWRDLAYWQLTLFPDLPWESLRPPYKALRWSTDCRHLKAWQKGKTGYPLVD  
AAMRQLWLTGWMNNYMRHVVASFLIAYLHLPWQEGYRWFQDTLVDADVAIDAMMWQNGGMCGLDHWNVFMHPV  
DAAMTCDPYGSYVRKWCPELADLPDELIHKPWKCPASMLRRAGVVFQGTYPYPERIVINLEEQRSKSLQDVALVR  
KQFQQYVDKRSGLDLVPLPKRLVSEALGVSHWDGAVVTEGKQFLLPVITRMEFKHQLEDPDADAASNPNYAVL  
KGYVSRKRDETI AFLNETDFTASVMYEGARRQERLERDYRRMEGLPPAPSNRRRARRTPTAKDKFSVVPGGAI  
ASRN

>Gambusia\_affi\_\_XP\_043981785.1

MVVNSVHWFRKGLRLHDNPALQEALSGADTVRCVYVLDPWFAAGANVGINRWRFLLESLEDLDNSLKKLNSRL  
FVVRGQPTVEFVRLFKWNVTRLTFEYDPEPYGKERDGAIIKMAQEFVGVETVVRNSHTLYHLDRI IEMNNNNP  
PLTFKRFQAIIVSRLELPRRPLAPVSQQQMNRCGLKISENHDQLYSIPSLEELGFRTEGLPPPVRGGEGEALD  
RLSRYLDKNVWVANTRVKTCSLYASPTGLSPYLRFGCLSCRLLYNLREIYMKLCKRSSPPLSLYGQLLWREF  
FYTAATNNPNFDRMEGNPICVQIPWDQNPALAKWAEGRTGFPWIDAIMTQLRQEGWIHHRARHAVACFLTRG  
DLWISWESGMKVFEELLLDADWSVNAGSWMWLSCSAFFQQFFHCYCPVGFGRRTDPNGDYIRRYVPILKDFPN  
RYIYEPWNAPESLQKAANCVVGVDYPKPMINHAEGSRLNIERMKQVYQQLSHYRGLSLLASVPTIQEEAEPPM  
TDESQTSSGPDSPPRVLADIEAAVCLMAPDSSTSAPVPDQDNASLHQLFQDHCTSSGWPSPPASSPPQSPAPR  
SKPGSPSSSCPSPSTSPSLLPRRRKGVAKGRRSQRQRERPSCPMAKEEDEEERMQEEADEERMEEETA AAAQ  
Q

>Garra\_andr\_\_ADL62680.1

SSNVGINRWRFLQLCLEDLDASLRKLNSRLFVIRGQPTDVFPRLFKWKITRLSYEYDSEPFGKDRDAAIKKL  
ATEAGVEVFVRISHTLYDLDKI IELNGGQSPLTYKRFQTLISKMDPVEIPAETITAEVMGKCATPVSDDHDDK  
FGVPSLEELGFETDGLSSAVWPGGETEALTRLERHLERKAWVANFERPRMNANSLASPTGLSPYLRFGCLSC  
RLFYFKLTDLYRKVKKNSLPPLSLYGQLLWREFFYTAATNNPHFDKMEFNPI CVQIPWDRNPEALAKWAEGR  
GFPWIDAIMTQLRQEGWIHHLARHAVACFLTRGDLWISWEEGMKVFEELLLDADWSVNAGSWMWLSCSSFFQ  
FFHCYCPVGFGRRTDPNGDYIRRYLPILRGFPAKFIYDPWNAPESVQKVAKCIIGVHYPKPMVNHAESRINI  
ERMKQIYQQLSCYRGLGLLATVPPNTTNGDGNRAGPSSGDNTQETNQITVHPSPANSHSEFSFPFVSCDQQS  
INIVQPQPGHTGVMVGQARKQSQRGRGASTLKPHNEHRASVVLTKIQRHDSN

>Garra\_andr\_\_ADL62683.1

EALNGADTVRCVYILDPWFAGSANVGINRWRFLLDLSLEDLDTSLRKLNSRLFVVRGQPTDVFPRLFKWNVTR  
LTFEYDSEPYGKERDAAIIKMAQEYGVQTVVRNTHTLYNPDRI IEMNNHSPPLTFKRFQAIIVNRELPKPLP  
TITQEQMARCTQISDNHDEHYGVPSLEELGFKTQORDSSHVWKGGETEAMERLNKHLDRKGWANFERPRIIT  
AQSLFASPTGLSPYLRFGCLSCRVFYNNLRELFMKLRRRSSPPLSLFGQLLWREFFYTAGTNNPNFDRMEGNP  
ICVQIPWDHNPEALAKWAEGRTGFPWIDAIMTQLRQEGWIHHLARHAVACFLTRGDLWISWESGMKVFEELLL  
DADWSVNAGSWMWLSCSAFFQQFFHCYCPVGFGRRTDPNGDYIRRYIPKLKDYPNCYIYEPWNAPESVQKAAN  
CIVGVDPKPMINHAESSRLNIERMKQVYQQLSHYRG

>Garra\_andr\_\_ADL62684.1

LHVLTVLGEPEKPV RDVSAEDFLRCMTPAEADHEKTYAVPSLADLGLLEVFDVLWPGGETHALQRLDKHFQSQ  
GWVTSFSKTRTPVNSLLPSSSTGLSPYLSLGLSVRTFYHQ LSSVYAQSKNHS LPPLSLQGGVLRWREFFYTVAS  
STPNFTKMEGNPICLQIQWYHDPEALEKWRTAQTGFPWIDAIMTQLRQEGWIHHLARHAVACFLTRGDLWISW  
EEGMKVFEELLLDADYSINAGNWMWLSASAFFH KYTRIFCPVRFGRRTDPQGQYL

>Garra\_andr\_\_AYN44210.1

MSHNSIHWFRKGLRLHDNPALLAALKDCRHIYPLFLLDWPYPNNTHIGINRWRFLIEALKDLDSS LKKLNSRL  
FVVS GPPAEVLPKLF EKWKITRLTFEVDTEPYSQSRDK EVMKLA EENGVEVIPKISHTLYNIDRIIEENNGKP  
PMTYVRFLSVVNAIGSPKKPVPAPTKE DMKGVSTPFFEDHEEEFRIPTLEDLGLDTSFLGPNLFP GGGEQ EALR  
RLDEHMERTTWVCKFEKPQTSPNSIIPSTTVLSPYIRFGCLSARTFWWRLADVYRGKQHSEPPVSLHGQLLWR  
EFFYTTAVGIPNFNRMEGNRHCVQVDWDDNPEHLAAWREARTGFPFIDAIMTQLCQEGWIHHLARHAVACFLT  
RGDLWISWEEGQKVFEELLLDADWSLNAGNWQWLSASAFFHQFFRVYSPIAFRKKTDKYGDYIKKYL PVLKKF  
PVEYIYEPWKAPRSIQERAGCVVGKDYPRPIVEHEVVHKKNIQRMKAAYAKRSPEGKDDKTTTKGIKRKAPSI  
MDMFEKKAKR

>Garra\_andr\_\_AYN44213.1

MSASRTVTCLLRNDLRLHDDEVFHW AQRNADHIIPLYCFDPRHYQGTYHFNFPKTGPFRLRFLLD SVKDLRAT  
LKKRGSTMLVRQ GKLEEVVSDLIQQLG SVTAVAFHEEVASEEKSVEKNLKDICCQNKVKVQTFWGSTLYHRDD  
LPF SHIRGLPDIYTQFRKVVEGQGRV RPVLSTLVQVKYLP LGLEEGNIPTFEALGQTEPVEDCRSAFP SRGGE  
TEALARLKH YFWD TNAVATYKETRNGMIGVDYSTKFS PW

>Garra\_andr\_\_AYN44215.1

MSANKRNLKHQKESPD SAGGKQPKLTGGKGRESGWLLKEVTKLRKAAQGCEFNKKRLRYLSDTQKIKQGS DGV  
LYWMARDQRVQDNWALIYAQQ LALAEKLPLHICFCLVPRYLDATYRQYAFMLKGLREVAK ECKSLDIQFHLLS  
GEPGQNLPSFVKNWKF GAVVTD FNPLRIPLQWIETVKKHLPSDIPFIQVDAHNVP CWEASEKLEYGARTIRG  
KITKLLPEFLTEIPLVDTHPHAASRTAKPVDWEEVLSSLEVD RSVGEVDWAQPGSSGGMAMLESFIDQRLRLF  
ASHRNNPNYDALSHLS PWIHAGQLSAQRVVQVKVREKNASESVLSFTEELVVRRELADNFCFYNNHNYDSISGA  
YEWAKKTLQDHAKDRRQYLYTKEQLENGKTHDQLWNA AQRQLVLEGKMHGFLRMYWAKKILEWTASPEEALSI  
SLYLNDRLSLDGC DPNGYVGC MWSVCGIHDQGWAERP IFGKIRYMNYAGCKRKFDVAQFERKYAVIKETPQKD  
TKKSI

>Gavialis\_gangeticus\_XP\_019374878.1\_PREDICTED:

MAASRSFPSSVPAPAGLCRAVHWFRGLRLHDNPALQAALRDAASVRCIYILDPWF AASSAVGINRWRFL LQS  
LEDLDNSLRKLN SRLFVVRGQPTDVF PRLFKEWGVTRLTFEYDSEPF GKERDAAIKLAKEAGVEVVVENSHT  
LYDLDRIIELNGNKPPLTYKRFQAIISRMELPKKPVSSITSQQMEKCKAEIQENHDDMYGVP SLEELGFPTDG  
LAAAVWQGGEMEALARLDKHLERKAWVANYERPRMNANSL LASPTGLSPYLRFGCLSCRLFYYRLWEL YKKVK  
RNSTPPLSLYGQLLWREFFYTAATNNPKFDRMEGNPICIQIPWDRNPEALAKWAE GKTGFPWIDAIMTQLRQE  
GWIHHLARHAVACFLTRGDLWISWECGVRVFEDELLDADFSVNAGSMMWLSCSA FFQQFFHCYCPVGFGRRTD  
PSGDYVRRYLPK LKGFP SRYIYEPWNA PESVQKAAKCIIGVDYPKPMVNHAETSRLNIERMKQIYQQLSRYRG  
LCLLASVPSCAEDLSGPVTD PASVQGCSTSTALKPSQSGQASPKRKHEGLEEMCTEDLYKRAKVTGLHGPEIP  
SQSL

>Gavialis\_ganget\_XP\_019358991.1

MFPKKQKQAAGADAGLSGSRKRGRQDAEAAPGAESLAEAVEQARRRAAPS VREFKFNKKRVRLLSQESH LQDG  
ALGILYWMSRDQRVQDNWAFLYAQR LALKQQLPLHVCFCCLVPKFLEATIRHFGFL LKGLREVAEECEGELGISF  
HLLQGYAKDVLPGFVTRHGIGGVVTD FSPLRVPLQWVEDVKERLPQDVPLVQVDAHN IVP CWVASNKQ EYGAR  
TIRPKIHAQLPEFLTEFPPIVQH PFPAAAPAQPIDWDACYASLEVDRTVSEVKWATPGTAAGLVVLQAFVARR  
LPGYSEYRNNPNKPALSNLSPWFHFGQVSVQRAVLEVQKSRDRHRESVDSFVEEAVIRRELADNFCFYNKSYD  
QLEG AHDWARDTLRLHARDKREYLYDLQQL EEGKTHDQLWNA AQIQMVREGKMHGFLRMYWAKKILEWTR SPE  
DALRFAIYLNDRFELDGRDPNGYVGC MWSICGIHDQGWAERNVFGKIRYMNYAGCKRKFN VNGQFEHKYRP

>Gavialis\_gan\_XP\_019364513.1\_cry-2-like

MKHSCIHWFRKGLRLHDNPALLAAMNDCSDLYPIFILDPWF PKNMQVSVNRWRFLIESLKDLD ES LKKLNSRL  
FVVRGHPAEVFPGLFKAWKVTRLTFEVDTEPYSKL RDAEVVRLAAAHGVQVIQKVSH TLYDTRIIAENNGKV  
PLTYRQLQAVLVGLGSPKQPV LAPTLET LKDCCTPGRDNHDPKYEIPTLEELGQDPKEAGPCLYPGGESEALS  
RLDFHMKRMTWVCNFKKPDTEPNTLSPSTTVLSPYIKFGCLSVRTFWWKLAEIYRGKTHSSPPVSLHGQLLWR  
EFFYTAGAGIPNFNRMEGNPICVQVDWDDNPEYVKAWKEGRTGYPFIDAIMTQLRTEGW IHHLARHAVACFLT  
RGDLWVSWEEGQKVFEELLLDADWSLNAGNWQWLSASAFFHQFFRVYSPVAFGKKT DKS GAYIKKYLPI LRKF  
PAEYIYEPWKAPRSMQEQAGCIIGRDYP RPIVEHEAVSKRNIMRMKAAYAQRSHSKAAQVEKEGT KKGKGRKL  
PAGPSVVELLTKPKAKSS

>Gavialis\_gan\_XP\_019370873.1\_cry-1\_X1

MGVNAVHWFRKGLRLHDNPALCECIQGADTVRCVYILDPWFAGSSNVGINRWRFL LQCLEDLDANLRKLN SRL  
FVIRGQPADVF PRLFKEWNITKLSIEYDSEPF GKERDAAIKKLASEAGVEVIVRISHTLYDLDKI IELNGGQP  
PLTYKRFQTLISRMEPLEMPVETITAEVMEKCTTPVSDDHDEKYGVPSLEELGFDTDGLPSAVWPGGETEALT  
RLERHLERKAWVANFERPRMNANSL LASPTGLSPYLRFGCLSCRLFYFKLTDLYKKVKKNSSPPLSLYGQLLW  
REFFYTAATS NPRFDKMEGNPICVQIPWDKNPEALAKWAEGR TGFPWIDAIMTQLRQEGWIHHLARHAVACFL

TRGDLWISWEEGMKVFEELLLDADWSVNAGSWMWLSCSSFFQQFFHCYCPVGFGRRTDPNGDYIRRYLPVLRG  
FPAKYIYDPWNAPEGVQKAAKCMIGINYPKPMVNHAESRLNIERMKQIYQQLSRYRGLGLLATVPSNPNGNG  
NGGLMGYSPGENVSGCSSAGAQMGTSDGHTVSVQPCALGESHVGSNGIQQQGYFQASSILHFPHGDNQQSHLL  
QQGRTSLSSGISAGKRPNPEEETQSIGPKVQRQSAN

>Gavia\_stel\_\_KFV47743.1

HLAYFVYRIIELNGHKPPLTYKRFQAIISRMELPKKPVSTVMASHQMEACKVDIQENHDDVYGVPSLEELGFPT  
DGLAPAVWQGGETEALARLDKHLERKAWVANYERPRMNANSLASPTGLSPYLRFGCLSCRLFYIRLWELYKK  
VRKLLPHLCLTVGLSLLLLQKRLLATNNPKFDRMEGNPICIQIPWDRNPEALAKWAEGKTGFPWIDAIMTQL  
RQEGWIHHLARHAVACFLTRGDLWISWESGVRVFEDELLDADFSVNAGSWMWLSCSAFFQQFFHCYCPVGFGR  
RTDPSGDYVKRYLPKLKGFPSTRYIYEPWNAPESVQKAAKCIIGVDYPKPMVNHAETSRLNIERMKQIYQQLSR  
YRGLCLLASVPSCVEDLSGPVTDASAGQGCSTSTTMRLSQADQASPKRKHEGAEEELCNEELYKRAKVTCLPTP  
EIPGKS

>Gavia\_stel\_\_XP\_009805516.1

GFMLRGLQEVAKECAELNIPFHLLGYTKDVLPGCVEHXGGLVTDFCPLRLPRQWVEDVRERLPEDVPFAQV  
DAHNIIVPCWVASPKQEYSARTIRGKIHAQLPEFLTEFPFVIRHPYPSPCAEPIAWEACYSSLQVDRTVKEVE  
WATPGTAAGLAVLQSFISERLKSFSSSHNDPNKAALSNLSPWFHFGQVSTQRAILEVQKHRGKYKESVDAFVE  
EAVVRRELAENFCYYNENYDSVQGAYDWAQTTLKLHAKDKRPFLYELQELEQGTTHDPLWNAAQQLQMVREGKM  
HGFLRMWAKKILEWTRSPEEALRFAIYGWAERAVFGKIRYMNAGCKRKFDVVGQFERRYAPRTLSQ

>Gavia\_stel\_\_XP\_009810059.1

FLLQCLEDLDANLRKLNRLFVIRGQPADVFPRFLFKEWNIAKLSIEYDSEPFGERDAAIKKLASEAGVEVIV  
RISHTLYDLDKIIELNGGQPPLTYKRFQTLISRMEPLEMPVETITPEVMEKCTTPVSDDHDEKYGVPSLEELG  
FDTDGLPSAVWPGGETEALTRLERHLERKAWVANFERPRMNANSLASPTGLSPYLRFGCLSCRLFYFKLTDL  
YKKVKKNSSPPLSLYGQLLWREFFYTAATNNPRFDKMEGNPICVQIPWDKNPEALAKWAEGRGTGFPWIDAIMT  
QLRQEGWIHHLARHAVACFLTRGDLWISWEEGMKVFEELLLDADWSVNAGSWMWLSCSSFFQQFFHCYCPVGF  
GRRTDPNGDYIRRYLPVLRGFPKAYIYDPWNAPESVQKAAKCIIGVNYPKPMVNHAESRLNIERMKQIYQQLSR  
SRYRGLGLLATVPSNPNGNGGLMGYSPGESISGCGSTGGAQLGTGDGHTVVQPCALGDSHTGASGIQQQGY  
CQASSILHYAHGDNQQSHLLQAGRTALGTGISAGKRPNPEEETQSVGPKVQRQSTN

>Gavia\_stel\_\_XP\_009813817.1

MPHHTIHLFRKGLRLHDNPALLAALESSQVVYPVYILDRKFMTSVMHIGALRWHFLLQSLEDLQKNLCQLGSC  
LLVIQGEYESVLRDHIQKWHITQVTLDAEMEPFYKEMEANIRRLGEELGFVLSLVGHSLYDTRKILDLNGGT  
PPLTYKRFLHILSLVGDPFVVRNLTAEDFQRCRPSDPGLAECYRVPLPVDLKIIPESLSPWRGGETEGLQRL  
EQHLTDQGWVASFAKPRITPNSLLPSTTGLSPYFSLGCLSVRTFFYRLSNIYAQAKHSLPPVSLQGQLLWRE  
FFYTVASATPNFTKMAGNPICLQISWYEDAERLHKWKTAQTGFPWIDAIMTQLHQEGWIHHLARHAVACFLTR  
GDLWISWEEGMKVFEELLLDADYSINAGNMMWLSASAFFHQYTRIFCPVRFGKRTDPEGQYIRKYLPLVKNFP  
SKYIYEPWTASEEEQKQAGCIIGQDYPFPMVNHKEASDHNLMQKQVREEQYRTAQLTRDDTDDPMEMKIKRD  
HSEENVSKGKVARMTEQTETPSGITCWEPKNGKRGEPEAS

>Gavia\_stel\_\_XP\_009817663.1

REHSQPPVSLHGQLLWREFFYTAGASIPNFDQMVGNPICLQVDWDDNPQHLHAWREGRTGYPFIDAIMTQLRT  
EGWIHHLARHAVACFLTRGDLWVSWEEGLKVFEELLLDADWSLNGXWLWLSGSAFFHRYFHVYSPITFGKKT  
RDGAYIRKYLPLVKDFPTEYIYEPWKASRAVQERAGCLVGTHYPQPIVEHGAASKRNLGRMKAARARKALPPP  
RLPSSPPGTEQEPPSVPSVAKSQRKKPKIEQH

>Gavia\_stel\_\_XP\_009820255.1

VLHWAQSNADFIIPLYCFDPRHYLGTHCYGFPETGPPFLLESCLKDLRETLKKKGSTLVVRKGKPEDVVHDLIT  
VLGSVS AVAFHEEATQEELDVEEGLCQVCSQHGVKIQTFASTLYHRDDLPRPIARLPDVYTHFRKAVESEA  
TVRPTLCMADQLKPLAPGVEEGCIPTMEDLGQKDPVMDPRTAFPCSGGETQALMRLQYYFWDTNLVASYKETR  
NGLVGMDYSTKFAPWLALGCISPRYICEQIQYKERTANQSTYWVLFELLWRDYFRFVALKYGKRIFSLRGL  
QSKEVPWKKDLQLFDCWKEGKTGVFPVDANMRELAATGFMSNRGRQNVASFLTKDLGLDWRMGAEFWEYLLVD  
YDVCSNYGNWLYSAGIENDPRDNRKFNMIKQGLDYDNGDYVRLWVPELQGIKGADIHTPWALNRAALSQVGV  
TLGKTYPQPVVTAPEWGRHINQRLQGRSPHPRGRGPAHMPTQHKDRGIDFYFSRKKDV

>Geobacter\_sul\_\_WP\_010943456.1\_photolyase

MNCGRIRSLQGEATAGPVIIYWMSRDQRVADNWALIAHKLALARSAPLGVLFCLAPRFLGATARQYRFMLK  
GLEQVRAALNRLDIPFFLVTDGPKGAVAAFTRRHRVSYLVTDFDPLRVKREWKQVAGEISIPFDEVDAHNIV  
PCWITSQRQEWGAYTIRPKIHRLLPDFMEFPPLQRHPFPWQALPSDAEWRETFTGMTLDESVEVSWLASG  
EEAAQAAALRFLDGLAGYATRNNPAVMGQSGLSPLWHFGQLSAQRVAQAFAAAAPIESRDAFLEELIVRR  
ELADNFCYYNDAYDRFDGFPEWAQRTLNRHRHDP RPQCYEHDVLEQQGQTHDSLWNAAQLEMVRWGRMHGYLRM  
YWAKKLEWTSSPEDALMIAIQLNDRYQLDGRDPNGYAGIAWSIGGVHDRPWAERPVGFTIRFMSRDGCRRKF  
DTPDAYERRVIISPATCAGIALCK

>Geococcyx\_cali\_\_NWH59420.1

KVDYDVCSNYGNWLYSAGIGNDPRENRKFNMIKQGLDYDNGDYVRLWVPELQGIKGADIHTPWALNSTALSQ  
AGVTLGETYPQPIVTAPEWSRHINQSLQGRSPHPRGRKAPAHTPVPHNRGIDFYFSRKKDV

>Geococcyx\_cali\_\_NWH60086.1

RFLQLQCLEDLDANLRKLNLSRLFVIRGQPADVFPRLFKEWNIAKLSIEYDSEFPFGKERDAAIKKLASEAGVEVI  
VRISHTLYDLDKIIELNGGQPPLTYKRFQTLISRMEPLEMPVETITPEVMEKCSTPVSDDHDEKYGVPSLEEL  
GFDTDGLPSAVWPGGETEALTRLERHLERKAWVANFERPRMNANSLASPTGLSPYLRFGCLSCRLFYFKLTD  
LYKKVKKNSSPPLSLYGQLLWREFFYTAATNNPRFDMEGNPICVQIPWDKNPEALAKWAEGRTGFPWIDAIM  
TQLRQEGWIHHLARHAVACFLTRGDLWISWEEGMKVFEELLLDADWSVNAGSWMWLSCSSFFQQFFHCYCPVG  
FGRRTDPNGDYIRRYLPVLRGFPKYYIDPWNAPESVQKAAKCIIGVNYPKPMVNHAESRLNIERMKQIYQQ  
LSRYRGLGLLATVPSNPSGNGGGLMGYSPGESISGCGSTAGQS

>Geococcyx\_cali\_\_NWH62918.1

QAKHHSLLPPVSLQGQLLWREFFYTVASATPNFTRMVGNPICLQISWYEDAELHKKWTKAQTGF PWIDAIMTQL  
RQEGWIHHLARHAVACFLTRGDLWISWEEGMKVPFWF

>Geococcyx\_cali\_\_NWH65292.1

DNWAFLYAQRLALKQELPLRVCFCLVPKFLDATIRHYGFMLKGLQEVAKECAELNIAFHLLLGyakDVLPAFV  
VEHGVGGLVTDfCPLRLPRQWVEDVKERLPEDVPFAQVDAHNIVPCWIASPKQEYSARTIRGKIHAQLPEFLT  
EFFPVIRHPHSPSCPTPIAWEACYSSLQVDSTVKEVEWATPGTAAGLAVLQSFITERLKFFGSHRNDPNKAA  
LSNLSPWFFHFGQVSTQRAILEVQKHSKYKESVEAFVEEAVVRRELAENFCYYNENYDNVQGayDWAQTTLKL  
HAKDKRPFLYKLQELEQGTTHDPLWNAQLQMVREGKMHGFLRMYWAKKILEWTRSPEEALQFAIYLNDRYEL  
DGRDPNGYLMCLCLAGCLWSICGIHDQGWAERAIFGKIRYMNYAGCKRKFDVGQFERRYMPH

>Geococcyx\_cali\_\_NWH67064.1

RFLQLSLEDLDNSLRKLNLSRLFVVRGQPTDVFPRLFKEWGVTRLTFEYDSEFPFGKERDAAI IKLAKEAGVEVV  
IENSHTLYDLDRIIELNGHKPPLTYKRFQAIISRMEPLPKPVCTVMSQQMETCKVDIQENHDDVYGVPSLEEL  
GFPTDGLAPAVWQGGETEALARLDKHLERKAWVASIERPRMNANSLASPTGLSPYLRFGCLSCRLFYRLWE  
LYKKVKRNSTPPLSLYGQLLWREFFYTAATNNPKFDRMEGNPICIQIPWDRNPEALAKWAEGKTGFPWIDAIM  
TQLRQEGWIHHLARHAVACFLTRGDLWISWESGVRVDFELLLDADFSVNAGSWMWLSCSAFFQQFFHCYCPVG  
FGRRTDPNGDYVKRYLPKLKGFPSRYIYEPWNAPESVQKAAKCIIGVDYPKPMVNHAETSRLNIERMKQIYQQ  
LSRYRGLCLLASVPSCVEDLSGPVTDASAGQGCSTSTAMRLSQTDQASPKRKHEGAEEELCTEELYKRAKVTGL  
PTPEIPGKSL

>Geotrypetes\_seraphini\_XP\_033784381.1\_cryptochro

MAANSVHWFRKGLRLHDNPALQAALRGAQEARCIIYILDPWFAASSSVGIIRWRFLQLSLEDLDNSLRKLNLSRL  
FVVRGQPADVFPRLFKEWGVTRLTFEYDSEFPFGKERDAAIMKMAKESGVEVIVENSHTLYDLDRIIELNGQKP  
PLTYKRFQAIISRMEPLPKPVCSITQQQMETCRADIHENHDDTYGVPSLEELGFSTEELGPAVWHGGETEALA  
RLDKHLERKAWVANFERPRMNANSLASPTGLSPYLRFGCLSCRLFYRLRDLYKKVKRNSLPPLSLYGQLLW  
REFFYTAATNNPKFDRMEGNPICVQIPWDKNPEALAKWAEGKTGFPWIDAIMTQLRQEGWIHHLARHAVACFL  
TRGDLWNSWEFGVKVFDELLLDADFSVNAGSWMWLSCSAFFQQFFHCYCPVGFGRRTPSGDYIRRYLPKLKA  
YPSRYIYEPWNAPEAVQKTAKCIVGVDPKPIVNHAESRLNIERMKQVYQQLSRYRGLCMLASVPSCAEDLS  
NPLVDPASGQGCSTGTVSNVLHCGQTS PKRKHEGAEDLQSEDKFKRTKVTNLVPPEIFTKDF

>Geotrypetes\_ser\_XP\_033808009.1\_cry-1\_X1

MGVNAVHWFRKGLRLHDNPALRECIQGADTVRCVYILDPWFAGSSNVGINRWRFLQLCLEDLDANLRKLNLSRL  
FVIRGQPADVFPRLFKEWKIAKLSIEYDSEFPFGKERDAAIKKLASEAGVDVIRISHTLYELDKIIELNGGQP  
PLTYKRFQTLISRMEPLEMPVETITSEVMETCTTPVSDDHDEKYGVPSLEELGFDTEGLPSAVWPGGETEALT  
RLERHLERKAWVANFERPRMNANSLASPTGLSPYLRFGCLSCRLFYFKLTDLYKKVKKNSSPPLSLYGQLLW  
REFFYTAATNNPRFDMEGNPICVQIPWDKNPEALAKWAEGRTGFPWIDAIMTQLRQEGWIHHLARHAVACFL  
TRGDLWISWEEGMKVFEELLLDADWSVNAGSWMWLSCSSFFQQFFHCYCPVGFGRRTPNGDYIRRYLPVLRG  
FPAKYIYDPWNAPDSVQKGAKCIIGINYPKPMVNHAESRLNIERMKQIYQQLSRYRGLGLLASVPSPNPNNG  
NGGLMSYSPGESTTTGYCQGSSILQYAHGDSQQNHLLQGRHILSTGVISGKRPNPEEETQSIGPKVQRQSIG

>Geotrypetes\_ser\_XP\_033814121.1\_photolyase

MPRKAKRARSPEEAASSDGGGETLLEGVARSLRAGSSVLAFAFNKKRVRLVSSSSSELKEASGGISYWMSRDQ  
RVQDNWAFLYAQRLALQQLPLHVCFLVPKFLDATIRHYGFMLKGLQEVAEECKELHIPHLLIGLAKDVL P  
QFINEHDIGGLVTDfSPLRVPLQWVDDVRKNLPDDVPFVQVDAHNIVPCWFASKQYEGARTIRKKIHDQLPQ  
FLTEFFPAVSRHPHNSKFTAEQSVWDACYASLQVDRTVGEVDWATPGGTAGLRVLQSFIGERLKFFNTDRNNP  
NKAALSNLSPWFHFGQVSVQRAVLEVQKYGKGFRESVDAFIEEAVVRRELADNFCFYNETYDKLEGAYAWARN  
TLKDHTKDRRTHIYTLQLEAGKTHDPLWNAQLQMVHEGKMHGFLRMYWAKKILEWSTPETALKYAIYLND  
RFELDGRDPNGYVGMWSICGIHDQGWAERAVFGKIRYMNYAGCKRKFDVEQFERRYHPKKFSH

>Gigantopelta\_aegi\_\_XP\_041350836.1

MYKLRLKQLLEWRITTLTFEEDPELYGKERDVAITSLTKEHDVETITRISHTLYDLQKILENNSGKHPLTYKRF  
QSIISGMDQPPHAEETIDADLIGSSVTPISENHNKKYGIPTLKELGFDVELVEPSSFRGGETEALIRLFRHLE  
KKGKTTILAWVANFEKPKLSPLSPFPSQTGLSPYLRFGCLSARHFYWNLRDLYKNIKKDNEPPMALHGQLLWR  
EFFYMAATNNPKFDQMVGNPICVQIPWDKNSEALAKWAEGKTGFPWIDAIMNQLKQEGWIHHLARHAVAYFLT  
RGDLWLSWEEGMKVFEELLLDAGWSVNAGMCMWLSGSSFFHQFFHCYCPVGFGKQADPSGDYVRHYLPVLKSF

PTKYIYEPWTAPESVQKAANCIIGKDYP CPMVNHA EVSQVNMQRMKQVYQYLTIKAKSKFQGV SFFFFLFFSFF  
FN

>Ginkgo\_bil\_AXV45366.1\_cry-1

MSTNCSIVWFRDLRVEDNPALAAAGVRAGPVIPLFIWSPEEEGHYYPGRVSKWWIKQSLVHLDSSLRSLGAPL  
ITKRSTDSISALLQVIESTGATQLFYNHLYDPLSLVRDHKLKQDLSTRGILVRSFNADLLYEPWEVNDEEGRA  
FSTFEAYWNKCLNMPYDPSPLLPKRRIIQGDVSSCPSENGLGEDESEKGSNALLARAWSPGWSSADKALTAF  
INGPLIEYAKNHRKADSATTSLSPHLHFGELSVRKAFHLVRIKQVLWANEGNTSGEQSVNLFKLSIGLREYS  
RYLSFNFPCSHERPLLALHNFPPWRVDKGYFKSWRQGRGTGYPLVDAGMRELWATGWLHDIRVVVSSFFVKVL  
QLPWRWGMKYFWDTLDDADLECDALGWQYISGSLPDGREIDRIDNPQIEGYKFDPAGEYVRRWLPELARLPTE  
WIHHPWDAPFVFLHAAGIELGSNYPRPIVEISAADRLQEALTEMWQCEAASRAALENGIEEGLGESLENNND  
LLPEHMDLDREPVRNNTIEAARSQEDQMVPSMTDDLRRAEVPYLLNQDVSSVAPPERPEVPSNMNPGIASTAP  
SEQYLGRFTRPMTRISNEGLPYVSDNDRLIQVLDLQNESQSTAESSSTLREHDEVSGGGIVPVWSQSMSGHSQ  
QFPEEGTVPGSNDSNDNRHLQSHPMVTRPWSQSRQAHIHGRPPSWELENNAVQSNAMV

>Glaucidium\_bras\_NXL29402.1

RFLQLQSLLEDLNSLRKLNSRLFVVRGQPTDVFPRLFKEWGVTRLTFEYDSEPFGKERDAAIVKLAKEAGVEVV  
IENSHTLYDLDRILIELNGHKPPLTYKRFQAIISRMELPKKPVSTVISQOMETCKVDIQENHDDVYGVPSLEEL  
GFPTDGLAPAVWQGGETEALARLDKHLERKAWVANYERPRMNANSLASPTGLSPYLRFGCLSCRLFYRLWE  
LYKKVKRNSTPPLSLYGQLLWREFFYTAATNNPKFDRMEGNPICIQIPWDRNPEALAKWAEGKTGF PWIDAIM  
TQLRQEGWIHHLARHAVACFLTRGDLWISWESGVRVFDELLLDADFSVNAGSMMWLSCSAFFQQFFHCYCPVG  
FGRRTDPSGDYVKRYLPKLGKGFPSRYIYEPWNPAPESVQKAAKCIIGVDYPKPMVNHAETSRLNIERMKQIYQQ  
LSRYRGLCLLASVPSCVEDLSGPVTDASAGQGSSTSTAMRVSQADQASPKRKHEGAEELCTEELYKRAKVTGL  
PASEIPGKSL

>Glaucidium\_bras\_NXL31451.1

DNWAFLYAQRLALKQELPLHICFCLVPKFLDATIRHYDFMLRGLQEVAEECAELNIPFHLLGYAKDVLPAFV  
VEHGVGGLVTDFCPLRLPRQWVEDVRERLPDDVPFAQVDAHNIVPCWVASPKQEYSARTIRGKIHAQLPEFLT  
EFPPVIRHPFPSPCPAEPIAWEACYSSLQVDRTVKEVEWATPGTATGLSVLQSFIAERLKSFGSHRNDPNKAA  
LSNLSPWFHFGQVSTQRAILEVQKHRGKYKESVDAFIEEAVVRELAENFCYYNENYDSVQAYDWAQTTLKL  
HAKDKRPFLYKLQELEQGATHDPLWNAQLQMVQEGKMHGFLRMYWAKKILEWTRSPPEALQFAIYLNDRYEL  
DGRDPNGYVGKADAPSPHPAGCLWSICGIHDQGAERAI FGKIRYMNYAGCKRKFDVQGQFERRYAPRT

>Glaucidium\_bras\_NXL38379.1

MGVNAVHWFRLRLHDNPALRECIQGADTVRCVYILDPWFAGSSNVGINRWRFLQLQCLEDLDANLRKLNSRL  
FVIRGQPADVFPRVFKEWNIAKLSIEYDSEPFGKERDAAIKKLASEAGVEVIVRISHTLYDLDKIIELENGGQP  
PLTYKRFQTLISRMEPLEMPVETITPEVMEKCTTPVSDDHDEKYGVPSLEELGFDTDGLPSAVWPGGETEALT  
RLERHLERKAWVANFERPRMNANSLASPTGLSPYLRFGCLSCRLFYFKLTDLYKKVKKNSSPPLSLYGQLLW  
REFFYTAATNNPRFDKMEGNPICVQIPWDKNPEALAKWAEGRTGF PWIDAIMTQLRQEGWIHHLARHAVACFL  
TRGDLWISWEEGMKVFEELLLDADWSVNAGSMMWLSCSSFFQQFFHCYCPVGFGRRTPNGDYIRRYLPVLRG  
FPAKYIYDPWNPAPESIQKAAKCIIGVNPYKPMVNHAEASRLNIERMKQIYQQLSRYRGLGLLATVPSNPNGNG  
NGGLMGYSPPGESISGCGSTGGAQPGAGDGHTVVQPCALGETHTGASGIQQQGYCQASSILHYAHGDNQQSHLL  
QAGRTALGTGINAGKRPNPEEETQSVSGPKVQORQSTN

>Gloeobacter\_kil\_WP\_023172026.1

MPSLAIVWHRRDLRLQDNPALARAAEQFQOVLAVFVIDPAIIGRDDTAPARVHFLRESLAELQRAYANLGGRL  
VVCRGEPAEQLVLARTLGAEAVFFNDIEPYARTRDQKVI EALAGAGVAHPCAEILLHPAAEVLTGQ GKPY  
TVFTFPWRNWSAKPKPRPFAAPERLSAPSVETGT FISLDELGKPFSGKLLVTPGEQAGIKLLDHFCEAALYRY  
DERRDHPAEPGTSLLSAHLKFGTIGIRAVWQRTIESWRKAPADRERANLAVWQQELGWREFYKYELAHFP ELA  
ERPFRRAFEQFPYDHDRERFERWCRGETGF PFVDAAMRQINTVSWMHNRLRMVVASF LTKDLLLLPYQWGERYF  
MQKLVDGDL SANNGGWQAASVGTDPKPLRI FNPSTQARRYDSEATYIRRWLP ELAPVD TAMLVESERFSPLF  
RSRYGYPQAIVEHKSQQQIFKERYRQIHSTEQADTSTSD

>Gloeobacter\_kil\_WP\_023172734.1\_DNA\_photol

MHTLLWFRKGLRLHDNPALQMAIQKATRLMPVFLDPHFIDPDRVGINRMAFLLESVLDDLRRRLRTLGSRL  
VLRGQPEEVLAHAFSTWQVGRLCFERDTEPYARNRDERLRLSLAQKCGIEVVSPTGHTLFDPAVLKAGGGRAP  
LTYSAFLRVISRLGTPAQPQPTPAHLPPPIAEICESPDYAIPTLTLELGYTDLEAVNHRYPGGETAGLERLG DY  
LADRARVAHFAKPDTPAFDPPATTVLGAHLKFGCLSARTFYIEVQAIYRQARSHTEPVSLLAQILWREFF  
YVLGYATPNYDRMAGNPICRQIAWDDNPAYLAAWSEGRGTGYPWIDAMHQLEREGWLHHL SRHAVACFLTRGD  
LWLSWEAGQAVFERLLVDQDWSLNASNMMWLSASAFFHAYHRVYSPI SFAKKYDPAGRFVRHYLPALERYPDA  
FIYEPWKAPLSVQREAGCIVGRDYPEPIVDHTEARTNRIERMMAFTADPSTLPT

>Gloeobacter\_kil\_WP\_023173156.1\_DASH\_famil

MSETILIWYRNDLRLHDHFIYRALQQRAQVPLYCFDPRAFGRTPHGFAKTGAHRARFLLQSVAALKDALEQ  
LGSGLVVRLGEPEAVIPALVKELNISAVYYHQEVTSEERAVESALEIALKPLNVALRAFWGTTLFHLEDLPFD  
VAQLPELFTDFRKRVEESPTVREALPAPGQLSKLPEVDPGALPTLATWGLEEPATDPRQVIEFTGGEPAGLAR  
LDHYFWQANLLKNYKQTRNGMLGGDYSSKFS PWLAHGCLSPRRIYEQVRLYESQRLKNDSTYWLIFELLWRDF

FRLVALKHGHNRLFRASGLRGLVIDWQDDPERFERWRTGQTGFPLVDANLRELAATGYMSNRGRQNVASFLT  
LGNIDWRQGAWEFESQLIDYDVTSNWGNWNYTAGVGNDAARGFRFFNILKQARDYDPEGDYVKHWLPELAHV  
PAPKIHEFPWKLLPVEQQRFGVRLGVDYPLPMVDLQSAANEALYNAAGERRAGRRRRRAGR

>Gonapodya\_pro\_KXS11844.1\_M427DRAFT\_

MPPTSTALSALAAKTTSASSTVLHWFRTDLRIHDNTALLLASKAAQSLTRGESRTNLACLFVVS  
PVEWRGHGCAPVKVDFWVRNVEALRDTLAERGIPLVVKMNDDKKGWKAVSEVVKEVCKELSVEELFY  
NVEYEVNEQRRDKMVTEAVAKLGKVT  
PCHDQC  
VVEPGKVVTKEGKVYTVYTPFKNSWHRYVSENKAVLAVRDPSSNNHKFSSTASS  
YIDSHSTIP  
SAPSLPAYSATPLFSQPSLTHLTFLRTLYPAGETA  
AQTRL  
SAFTASRIDAYHESRDLPTAPGTS  
SLSPYLALGVL  
SARQCVSAASAANGRRDTGKQGA  
VWVIQELI  
WREFYRHVLAGFPHVCKNRAFKPQYEGVQW  
TESWSR  
DVVLPAFPV  
PSTTSTPPPLPPAPP  
GTPNPLFTAWTQGR  
TGYPLVDAAMRYLLHTGWMHNRLRMIVS  
SFLVKDLLVDWRLGEAWFCANLIDHDLASNNGGWQWAAGTGTDAQPYFRI  
FNPSNQAEKFDKDGK  
FVRMWVKELEWVKDGVLLRGPWEAAAKGSVVVTKKKMEECGYPKPLVDHAQARLAAIAAFKLAVQ  
GADGGGGSDSDSGEEVV  
PKSKKRAAGASAGITGFLITKPKKQKK

>Gonapodya\_pro\_KXS17061.1\_cry/photol

MTSTRPHDFYAIAKLPARRPPHPPPTSLPPIATLPTLPSTDPSTLTGPDGSFSVSLLAELGHDEPPV  
DERSPHMGGETEALRRFEAWMKREKEVAKVKLPGWGVDQLHSSARLPSRLRAITL  
NHISPIPRRTALPFLPHLAILDTS  
CNFRTTKMGR  
TGSVAWVG  
FYLDIGRRQLKQEGWNHHLV  
RHAVAFFLIRGDLYISW  
ERGAEVEE  
LLLDAYHALNLLRLLHDLLPCLPPVSFAKKYDKK  
GIFAKRYVKEVAGLPEKYVWEPWTAPASVQALAKCKVGT  
DYPASIVPHD  
FERKTNMDRMAAAYKTGKRPVPESVGSVAAQGS  
SSAAGDVQDTLAGFTQGFGESDDEAAQDVARPAKRRAGTE  
DEEEEARENERPKEKKKKAKS

>Gonapodya\_proli\_KXS15620.1

MSTASSTASRPKIAIILLNGAPRLHDNPLWLLRSPRRLGIPTATHALPLFCLDPRRYDLEMMYTGKEG  
ADGPKTRWFGFPKCGKWRSKFIIESVQDIRTSLKSLGSDLC  
LVPGRIETVVPQLVESCRSNHPTGADVGVWISKEIS  
SEELVVERKLAQNL  
SALFPSVPLFAEW  
TSTVFPSEFTFSH  
SNAWPASSAVNPVSNLFGGSTFLQLPDVFNQFR  
KLVESRAGEPPEPYQRPASVPP  
LPDWLTLEGIGPENK  
GIGKPGHDDVSKFGH  
IPSSLLEVPTHESSAF  
PFRGGESSALGR  
LNHYISSGLITTYKQTRNGLLGEAFSTKFS  
PWLADGSL  
SARKIWHQVRQ  
HENTHLESEGS  
AWILFELLWREF  
FKFHAVKYGDGIFRIGGVHAGTYKETFAKAWKRSV  
KSGWDMFSV  
VNADSRWALPNNEAFKSWADGRT  
GIPWVDAGMRELKETGFLSNRSRQNVASFFLQSVPT  
ISSSQSANGQVAPNWLPA  
AELFESLLIDHDPHSNYGN  
WQYLAGVGTDP  
RGWRKFNM  
MKQAAEYDARA  
EWSTWVTELAGIKK  
SLEERGGTTEQFHKPWT  
VNGGRAVDEVG  
YPRPIAVEREWSHVR  
FPEVKLGERRSALVANS  
PSLRQDESSLEERPRD  
GFGGRARSARSNQKRRVDAPWNGGR

>Gouania\_will\_\_XP\_028290364.1

MSASRTIICLLRNDLRLHDNELLHWAQRNAEYIVPLYCFDPRHYVGTYHFNLPKTGPFRLRFLLES  
VKDLRNTLVNKG  
SNLVVRRGK  
PETVIAELIKQLG  
SVSGVAFQEEV  
TAEELNVEKKVRE  
VCAKLNK  
KVHTCWGSTLFH  
RDDLPFH  
HSSSLPDVYTQFRKAVETQSRVR  
PLLQTPEKLNPLPVGLEEGSVPTAEDLEQTEAVT  
DPRSAFPCSGGE  
THALARLKHYFWD  
TDLVATYKETRNG  
LIGVDYSTKFAPW  
LAMGCISPRYIYH  
QIKQYETERTANQ  
STYWVIFE  
LLWRDYFRFVALKYGNRMFHV  
KGLQEKSV  
PWKRDMKLFDAWKEGRTGV  
PFFVDANMRELAMTGFMSNRGRQ  
NVA  
SFLTKDLC  
LDWRMGAWEF  
EYLLIDYDVC  
SNYGNWLYSAGIGNDPRENRKFNMIKQGLDYDSNGDYVRQWL  
PELQ  
TIRGADVHTPWILSSAALSHAQVSLGDTYPTPVIVAPEWSRHF  
NKKPGGGGPSQ  
RGKKGPSHTPKQHRDRGI  
DFYFSRSKNL

>Gouania\_will\_\_XP\_028304438.1

MVVNSVHWFRKGLRLHDNPTLQEALNGADTVRCVYILDPWFAGAANVGINRWRFLLEALEDL  
DSSLLKKLNSRL  
FVIRGQPTDVFPRLFK  
EWRVTRLT  
FESDPEPYGKERDAAIKMAQEF  
GVT  
TVVRNSHTLYNLDRI  
IEMNNNSP  
PLTFKRFQ  
TIVSRLELPRRPMP  
PITQQQMDKCHTKISDNHDQ  
LYSIPSLEELGFR  
TVGLPPAVWRGGESEALD  
RLNKHLDKKVWVANLEH  
PRSN  
TCSLYASPTGLSPYLRFGCL  
SCRILY  
YNLRELYMKLRKRSNPPLSLFGQLLW  
REFFYTAATNNPNFDRMEGN  
PICVQIPWDQ  
NPEALAKWAEGR  
TGFPWIDAIMTQLRQEGW  
IHHLARHACVFLTRGDLWISWESGMKVFEELLLDADWSVNAGS  
WMLSCSAFFQQFFHCYCPVG  
FGRRTDPTGDYIRRYIPILKD  
YPNRYIYEPWNAPEAIQKAANC  
VVG  
VHYPKP  
MINHAEGSR  
LNIERMKQVYQQLSHYRGLSLLASVPTIQEEAE  
PPMTDESQTSSGAESPTRDSADCEVAGCSTAPDSSTASPAFTVALKQVQEDASTAASPPHNR  
PCTSAVPPHPIPSMADSSPWSISKSPSSSSCPSFSPSPASCAAPHTISFSASSCLGPWRKGLSRKARRG  
QQRQGRGPSCSPAACEGEREEVGEERMEEGVEQEDDRMELEEKTEGEPQ

>Gouania\_will\_\_XP\_028304738.1

MVVNTIHWFRKGLRLHDNPALRDSINGSDSLRCIYILDPWFAGSSNVGINRWRFLQLCLEDLDASLRK  
INSRLFVIRGQPTDVFPRLFK  
EWEITRLSYEH  
DSEPF  
GKERDAAIQKLACEAGVEVMVRISHTLYNLDRI  
IEINGGQ  
PPLTYKRFQGLINRMDAVDSPAETITYDVIK  
NCTPPIRDDHDDKFGVPSLEELGFETEGLSMAVWPGGETEALM  
RLERHLERKAWANFERPRMNANSLASPTGLSPYLRFGCLSCRLFYFKLTDLYKKVKKNGTPPLSLY  
GQLLW  
REFFYTTATNNPCYDKMEGNPVCVQIPWDRNPEALAKWAEGR  
TGFPWIDAVMTQLRQEGW  
IHHLARHACVFLTRGDLWISWEEGMKVFEELLLDADWSVNAGS  
WMLSCSSFFQQFFHCYCPVG  
FGRRTDPNGDYVRRYLPILRG  
FPAKYIYDPWNAPEEVQKAAKCVIGVHYPRPMVNHA  
EASRINIERMKQIYQQLSCYRGLGLLATVPNNPSNSA  
SGSNGEGVSTRTSQTPDDSYKHEASSTNKRQSVLKRREEIVSETSCKSWRPGK

>Gouania\_will\_\_XP\_028306298.1

MSSSAADQTLLRQMLGQLLGGREDPEGFFAMCVSVLGHRETRSRFSPFIQPLCASHGSLHAQLTSIYLRYFSK  
SEDDELGMALALSLVENTNPQSAQRSDEISAPPLGSESRSRGKEPENKAKDRAMMNVEESLKTQEKVSRSKKR  
RQRRKGVVQQIVGLPGSPSAAAPVLLWIRRDRLRCDNPALIGCLELGAPVIPVFIWSPEEEEGPGPTVAVGGA  
CKFWLHQALSCFCASLEYIGSHLIFLNATGKANELRASLHVLKDLIMETGARTVLANSLEYEPWLKERDDEVLS  
ALQTEGVECRMFPSPYCLREPYSVSTRGVGLRGIGSVSHFMSCCRQNPGAAGVGPLDPPASLPTPSSWPQGVPL  
DTLGLARMPRRKDGVIDWAANIRTSWDFSEDGAHSRLEAFLHDGVYRYEKESGRADAPNTSCLSPYLHFGQL  
SPRWLLWDAKGACCRPPKFQORKLAWRDLAYWQLTLFPDLPWESLRPPYKALRWSSDGGRLKAWQRGKTGFPLV  
DAAMRQLWLTGWMNNYMRHVVASFLIAYLHLPWQEGYRWFQDTLLDADVAIDAMMWQNGGMCGLDHNFMHP  
VDSAMTCDCPGTFVRKWCPELTDLPDELIHKPWTCPASMLRRAGVLIGQTYPERIVTDLEEQRSQSLRDVALV  
RRQFPQFVDKRSGLDVLPLPRLVSEALGGTREDVSGDFLLPVITRMEFKHQDDPDADSASNPNYAVLKGYR  
SRKRDETI AFLNERDFMTSVMFEGTQRKERLEKDQCRLEGLPPPPPSASRGRARRTPHAKDQFSIVPGGAVTS  
LK

>Gouania\_will\_\_XP\_028328731.1

MLHIIRSRSYFASVTLLKQTIKNPKSRLSFIVTSSMSGRRKRKAPSAPAAKPASKQQKTEKKKKEEEEESVDSA  
PEISEKPPTEFNKRIRLISDTEKIKQGSEAVLYWMLRDHRVQDNWALIHAQQALALEEELPLHVCFLVVPKS  
KTSTLRHYSFMLKGLQEVSKECKQLNIQFHLLHGAPDEVLPGFVSEQRFGAVVTDFSPLEPIRWLEMVNKAL  
PQDIPLIQVDAHNVVPCWVASPKQEYAARTIRGKITKLLPEFLTGFPLVEKHSYTAARTAKPVDWEETLNSLN  
VDR TVAESKWAEPGTKAGLLMLKSFIDVRLKTFGTLRNDPNSPSLSQLSPWIRFGHLSAQHVALQVQRNGKKF  
GSSVAPFLEELVVRRELTDFNFCFYNDKYDKVEGAYEWAQKTLREHAKDKRPYIYTLQQLENAETHDKLWNAAQ  
YQMVSEGKMHGFLRMYWAKKILEWTSSPEEALS FALYLNDRYELDGQDPNGFVGCMMWSICGIHDQGWAERP I F  
GKIRYMNKGLRKFVDVASFEKKYSPKKL

>Gouania\_will\_\_XP\_028328938.1

MAHSCIHWFRKGLRLHDNPALMAALRDCKELYPLYILDPNYTYGGKKRIRFLMGALKDLDCSLQKLNLSRLFVV  
RGKPEEVFPPELFSKWNITKLTIEYDTEPYGRSCVGKVTTLAQEHGVEVIYKISHTLYDIDRIIEENNGKPLT  
YNRLQSLVKTGLGPPKKPIPAPTMEDIKDVKTPCFEQHNKKYKIPSLDMGVDSTSMEEEQFPGGEQEALRRLD  
EHMKMTAWVCSFEKPQTS PNSLRPSTTVLSPYTTFGCLSARTFWWRLSEVYRGKKHSDPPVSLHGQLLWREFF  
YTASVGIPNFNKMEGNPVCTQVDWDTNSDYLAWKEARTGFPFIDAIMTQLRMEGWIHHLARHAVACFLTRGD  
LWISWEEGQKVFEELDLDLWALNAGNWQLSASTFFHQYFRVYSPIAFGKKTDKNGDYIKKYLPI LKKFPPN  
YIYEPWKAPLSIQQAAGCIVGKDYPRPIVQHEVVS KKNIQRMKVAYAKRSPHITDSPEKKKGTKRKAPT VVEM  
LMKKNRRQ

>Gracilariopsis\_cho\_PXF42490.1\_photolyase

MSGNTSPAETTRVHKLNNNDVNKAGTFVLYWMSNSLRSHYNYALAHASYLCEKYEMPLRVAHVFDABAQDGKP  
LPERHAAFQLESLSDVQKDMHERNVFVINGSHKARDAVPALAEADAVAVVTDTSYLRKGRSDRHAVATALPI  
PLYAVEADVVPVQTVSSKSEYAARTIRPKITRALKDYLVPMKNVELTNQTNCDLKRWVSSANPDLSLLTLED  
LDESLKMEGLDRGAPVRVFFKGGQEEAQKRLTTFLEDEKLREYGGGRNEPAKQLQSDLSPLYLRSGNISPV DIA  
LHTKAKATKKASWKESEESFLEELIVRRELAVNACWFNADAYDVYEQIVPNFARESLALHKS DKRPKI FTYEE  
LEAAVTEDPYWNAAQLEMVVKGMHGYMRMYVWKRIIGWVEDPADAMDYAIRLNNRWELDAVDPN SYAGVIWC  
FGLHDRGWTERPIWGVKRYMNESGLKRKFNPAYIAYVDKMVASEGLPRHIAELRKKHKMGQQQTIDGSRKR  
LRSRKATSSSSKSLRGSESKSVKRIKM

>Gracilariopsis\_cho\_PXF43553.1\_cry-1

MSAFHATVPSAKWFRKPSVVWYRGNDLRVEDHPALLAAAQRGGPVVPLFIWDSSDGFGAAMGATKQWWLRESL  
THLQHDRLRLGLVQLYTRKGRSTEELRAFLHETGADAVFWNRCYEPDLLKRDEELREELAQEGLTAVSFKAELL  
VEPWELTNSKTS PRFETFTHTYMCAMMTVAPPPQFPFCPSRLQPI SKIVPSTGIDLLGFVIPDDVANKLGKVWT  
PGSAHAKRQLDRFLKEIFPAFGDSRCRRHFEGTSRLSPHIRFGELS PRMYHATRLRVLRDQNLQKASIGQS  
AEPNPYAVKHPALSDVKS LTGENNKFRKQDIHGLSAPCSSPVGGQNASLRDMSTIRRPQTRNNKADQASATPT  
GRRRGVLPQISRSGRAFLKNLCLRDFS YHVL YHFPDLNSQPLIPEFAKF PWAEDNGLFARWRAGATGYPIVDA  
AMRQLHQSGWVHNGMRFLACFLT KYLLL PWSRGLEQFYDLLIDGDRSANALGWQWTTGSNTDAFPIT ALVNP  
VKQAHKHDPNGDYIRRWLP ELARLPVEYIHEPWKAPFEVLDKCGVQLGNTY PKRIVLISDARARATKAMTTMK  
RLFAGNIVWRRYLKYDEEDLINEWPEQKPNVAVRVEDSNNPNGKGFLLPSLWALLQCEQPPSYISGSSTAIEPL  
ISMDDTACLDGALAIPLDDQPESIEQAFISTHEFVSTDPHLSSDGLLSPEVRDVTTPSVHPVPSDEQSHALF  
HGENIKSEVDVQQLADPMPKYTAVGSESYKDEARIQNQVEDEFGSSLANQGEDKKRTPDKGQPSAPAENIVCDTV  
SAVPDQNRRTIASPPASHGSQASQEQPARNQPV LGLEQYTTQASDPAALTPHSAAQRPFAISHSNALQSQSSI  
HARIRPNNKEPHEQQIQFQQSQIHAPFHIGDLRGHQSFSSQVLLSSQQYHGTDAAHIAKQPSQHQGSQHPMPVH  
NVMDPTYAARFSTGRVNLNPMAGVMPANPVMMGTVPTGMGSVPSGSEFGTSHLLNGD TLNAQQAHAVRAHP  
FFGYRQYVPMVNAHPSSTGERPELVGPSAAHSQKFSVPAIFPVSYDIYGNGAFDPSVFGGSLSQPQFP SHVYA  
PQSQA VPIGVRHANGTSHPLLPVVGPRTELQQPQTSSVLSQEVNTAGAVAPNRHEPGAVGGSSSMLNGTTTRKS  
VNQNR LAEFEETCATPSRIYSARCRKGGQPSTSKGPGSANGGYVTPSTNVDNTSGLNISQQSRPNTKPIPKQR  
QPPRSKRLRQSQGLSSRGKHDAKKGSKERSQRNGSESTHKAQAQSVGAATTPKSRQKILES VLTTEGHEYRGF  
ARYLSQTYEFTGNTDRQTSRDYVRLCNLKDDYHKKCNSEKHKLKIYRIKHFFSKVLKLEVTGEWDRHNHGGVR  
GPYVYGIK LKQQANSKSK

>Gracilariopsis\_cho\_PXF45941.1\_cry\_DASH  
MRRGPRRVSNRGRDLHRGGSSRRGRAKNSWFSHPRASVDPFSGPRVIEQAAPKSLPPESASILWLRNDLRVCDH  
EALALANTSGTMVPVFI FDTSKFGIKNASPWGFGQRNGPFRTVFMIESVKDMQQNLRLRGNDMLVRQGDVPVTEI  
LDIAKALAESGFDSVNVVAHKETTWEETKDEDALQAGLKRLAQETGKDMEAYWLWGSTMHHVDDVPFNPGGPG  
LPETFTAYRKLVEGKKTVPREEVPTPERLNPFPMELRRLSRDFPSLRNDLQVEGLCDPLDHAFPHPLGAMDFV  
GGESNGLDRMNEYIWDINGLECYKETRNDSGKRNFSKFSPLWALGCI SPRTLYWQVREYEQKKVANDSTYWM  
LFELMTRDYFRWVSASVGTCLFAVNGYSGRSVGEP SLFDVNPAAVRPIHRTRLQKWIEGKTGAPYIDASMREL  
ALTGFMSNRGRQNVASFLIHDLEFPDWRAGA EYFESVLIDHDVASNWGNWAYLAGVGS DPRGGRKFNVVKQSK  
QYDPEGWFITRWCEPIDIPPPMIHEPHLLSSEALKEVGITEGETYPTPIVRLPTAPSSQKEQ

>Gracilariopsis\_cho\_PXF46329.1\_(6-4)DNA\_p  
MPSPAHLHWFRDLRLTDNRALNEAIRVAKKTKSPLIPLYILDPNLIPQNC SAVRMFLRESVSQLRSSLLKH  
GLNLRVVRGQATQVIPDLAGRWRVRDFTWESEYDVPVSREERDAQVARDLKSGSVNVRTFPGFLLYDPPDVL RHC  
NGLAPRTMTGMLKLVEILGDPRTPD SFANGELVEFEEDPFLYEDRAQGMCDIPSLADLGYQDPENRWDVFE GG  
EKAGLKLRLHRFVKQKNGRIVADFAKPKTNPAAFSHRETTVLSPYALGCVSCRVFHERLREVEQRYALQEMPQ  
TTLWGQLIWREHFWLLAYSVKNFHQMRGNVVC RQINWRADKQSEELLRTWAEARTGFPWIDALMTQLHKEGFI  
HHLGRHSLACFLTRGDLWISWERGFKVFEKYLIDYDIALNSANWMLSCSAFFVMYRVYS PVTYGKKWKDGDG  
NFIRHYLPVLRTPMSKYIYEPWKAPKELQRRVGCII GKDYPEPIVDHRTASQCNIARMKESFEKGEFGKLEDE  
TESRVIASANNSIITSDDVREPYKRRRR

>Gracilariopsis\_cho\_PXF48820.1  
MPPPISCSPSTHSVFRVLGSPSCNADHLNHS LPDTAATVHSASIPSSPSPSPAAPIVVWFRGHDLRVHDHAAL  
DAAIASGAPVVALYVLERGAETDGASSYVRRLSASRTQHSHSEACSSITTSCHSATASHHPLYGTAYTATSP  
STDEDHHHDHHDHDEHCEPWGPLSPNGGFALGRVQRWYLHHSRLVLRQLQHLGVTLVLRVVDCAEETS RQVLS  
VVRLRLRAATVFWNKRYKPRAYPVDEAVKSALRKLNVASHDFDSETLI PPSTDYGRFNDFQGYTRFWINHMRLQ  
PPPQPEPPLDPHAVVAYPRQLVFQLLSASSHYCSTPNRLPPFAAPVLP SVSDLELLDGLDVHGDHSPGDVSSI  
GCVAAARALHRFLNGDRFARFASDVARRDGMVTGTDLATSRLSPHVRFG EISPRVLFWSVVNAGATAQMNGDA  
QGLCAARVFLKNMSLREFGYMLRRYP SAAWKPIPEFEFVFPWEDDS DGELTRAWKNGTTGFPIVDAAMRQLI  
REGWLHNMRFLAASFFCKYLLLPWPVGAAH MVRTLVDGDEACNSLGWQWTAGCNSDSFPFSTLVNPLSLH TH  
TQSRTRAAAYVRKYVPELAHLPSL VFTPWKASLEECAYNITLLPLRNYTDISQSLQFNARS GDRDMAYYPS  
RIVTGPQARYRARRAMEVMRRIFTAQKQCRTLLVDHTQFPFGDEINPLQLESYGMVLDVDH QGDGLSNKKSIS  
LQETTSFVSTITTQRKNTRSRDEQD SLLVTPARKRMRTQTGEEDRTPHVD AVQLRTPSTRRPHIVQTEVPVPK  
AITERADTKATGNMLARLGDVGSVADQNVHIQIPKTTPAASRERIS ETPVGGGHRNPKRPRS PSLNAVTLES  
TPQLSDPSGSKTPKLTDDRLSVSSLLSPNHSLP THPVSQEP RPNHRRAVAAELNFAMSGLPRLAQAASI QCAA  
RFTPHAGTMPNMSSEAVVSPHLSTCPTTPALSHGRHPSPEGEAPRSKGP NKLDANTEMSAPDSRVSVGFSVTT  
GRKDSTPQLAQPPVNSRTAERP SLTVPSRMIRSETFSNHSSYV VAPAPAGNQGVVVGMSRSM MQGNEGANSV  
AFNQATAAPTHMFHPSNIPVALMGTHIGSPQNQGTHMLMPFTPAAGHIPMQPI THHPGAVQAQGT PQGYVNMR  
AMGAPAQQTTPGAPFTWYPTMHPYMGFRPAVL PQLOHPLMSSGHPALANPYQLDR TNVRSRPMQQNMAVPVPSQ  
NTGAQSPRRVCPTTPLERQGIARRMAAMDYTD ETYGGKHWEQWQAI ALHLLNQYEFSEDTDRDTTRAYVRLCV  
LKDELDRANPSGPRVTVNHCKEVFRI LNL PVTGEWDRRGHGGV RGPYVYGCMRKNGQYSSRR

>Gracilinanus\_agil\_\_XP\_044525951.1  
MAPKKRSLGDNDQEKTETQENKAKRKPLQKHQFSKSNVVQKEEENKKEGEKKGGA EGLHEVVQSRLQTASS  
VLEFRFNKQVRLLSQDCHLQDHSQAFVYWM SRDQRVQDNWAFLYAQRLALKQKLPLHVCFLAPCFLGATIR  
HYDFMLRGLLEEVAEECEKLHIFHLL LGLPKDVLPAFVQA HGIGGIVTDFSPLLHHTQWVKDVQDGLPKQVPF  
VQVDAHNIVPCWIASDKQEYGARTIRHKIHDRLP HFLTEFPPIICH PYP SNIQAEPVDWNACRAGLQVDRSVK  
EVSWAKPGTASGLTMLQSFISQRLPYFGSDRNNPNKDALS NLSPWFHFGQVSVQRAILEVQKHSRYPDSVAN  
FVEEAVVRRELADNFCFYKNKYDKLEGAYDWAQT TRLHAKDKRPHLYSLEQLES GKTHTDPLWNAQMOMVQE  
GKMHGFLRMYWAKKILEWTRSP EEALEFAIYLNDRFQLDGRDPNGYV GCMWSICGIHDQGWAEREIFGKIRYM  
NYAGCKRKFDVAEFERKYSPAD

>Gracilinanus\_agil\_\_XP\_044533177.1  
MGVNAVHWFRKGLRLHDNPALKECIEGADTVRCVY ILDPWFAGSSNVGINRWRFL LQCLEDLDANLRKLNSRL  
FVIRGQPADVFPRLFK EWNIAKLSIEYDSEPF GKERDAAIKKLASEAGVEVIVRISHTLYDLDKI IELNGGQP  
PLTYKRFQTLISKMEPLATPVETITPEVMHKCVTPLSDEHDEKYGVPSLEELGFDTDGLPSAVWPGGETEALT  
RLERHLERKAWVANFERPRMNANSLASPTGLSPYLRFGCLSCRLFYFKLTDLYKKVKKNSSPPLSLYGQLLW  
REFFYTAATNNPRFDMEGNPICVQIPWDRNPEALAKWAEGR TGFPWIDAIMTQLRQEGWIHHLARHAVACFL  
TRGDLWISWEEGMKVFEELLLDADWSINAGSWMWLS CSFFQQFFHCYCPVGFGRRTDPNGDYIRRYLPVLRG  
FPAKYIYDPWNAPEGIQKVAKCLIGINYPKPMVN HAEASRLNIERMKQIYQQLSRYRGLGLLASVPSNPNGNG  
SLMGYTPGENIPGCSSGGGAPVGASDGQILQACVLP EPPTGTSGVQQPGYSQGS GISHYSHEDNQAYMLKQG  
RSSLGVGGGKRPRQEEETQSINPKVQRQSTN

>Gracilinanus\_agil\_\_XP\_044536012.1  
MTVTAAATAPTPAPAPATASAPFPGPAPEG ASSVHWFRKGLRLHDNPALQAALRGARCVRCVYILDPWF AAS  
SSVGINRWRFL LQSLEDLDISLRKLNSRLFVVRGQPTDVFPRLFK EWGVTRLTFEYDSEPF GKERDTAIVKMA

KEAGVEVVTENSHTLYDLDRIIELNGQKPPLTYKRFQAIISRME LPRKPVNSVTSQQMQRCQAEIQENHDDAY  
GVPSLEELGFPTDGLGPAVWQGGETEALARLDKHLERKAWVANYERPRMNATSLLASPTGLSPYLRFGCLSCR  
LFYYRLWELYKKVKRNTTPPLSLYGQLLWREFFYTAATNNPKFDRMEGNPICIQIPWDRNPEALAKWAEGKTG  
FPWIDAIMTQLRQEGWIHHLARHAVACFLTRGDLWVSWESGVRVFDLLELLDADFSVNAGSWMWLSCSAFFQQF  
FHCYCPVGFRRTDPSGDYVRRYLPQLKGFPARYIYEPWNAPEPVQKAAKCVIGVDYPRPIVNHAE TSRLNIE  
RMKQIYQQLSRYRGLCLLASVPSCLEDLSSPMVEASMGQAGAIGGSGLKPLPCSPASPKRKLEATEEAPGEEH  
SKRARVMVAAALLPVPELAGRDV

>Grus\_ame\_NWH19278.1\_CRY1

MPHRTIHLFRKGLRLHDNPTLLAALESSEAVYPVYILDRKFMTSVMHIGALRWHFLLQSLEDLQQNLCQLGSC  
LLVIQGEYESVLRDHIQKWNITQVTLDAMEPFYKEMEANIRCLGEELGFVLSLVGHSYDTERILDLSGGT  
PPLTYKRFLHILSLLDGPEVPVRNLMAEDFQRCRSPDPAALAEYRVPLPVDLKIPILETLSPWKGGETEGLRRL  
EQHLTDQGWVASFTKPKTIPNSLLPSTTGLSPYFSVGCLSVRTFFYRLSNIYAQAKHSLPPVSLQGQLLWRE  
FFYTVASATPNFTKMAGNPICLQISWYEDAERLQKWKMAQTGFPWIDAIMTQLRQEGWIHHLARHAVACFLTR  
GDLWISWEEGMKVFEELLLDADYSINAGNMMWLSASAFFHQYTRIFCPVRFGKRTDPEGQYIRKYLPIILKNYP  
SKYIYEPWTASEEEQKQAGCIIIGQDYPFPMVNHKEASDHNQLMKQVREEQYRTAQLTRDDTDDPMETKVKRD  
HSEENVSKGKVARMT

>Grus\_ame\_NWH19651.1\_CRYD

KVDYDVC SNYGNWLYSAGIGNDPRDNRKFNMIKQGLDYDGN GDYVRLWVPELRGIKGADVHTPWALNSAALSQ  
AGVTLSETYPQPVVTAPEWSRHISQRLQGRSPHPRGSRGPARTPVQHRGIDFYF SHKKDV

>Grus\_ame\_NWH23856.1\_PHR\_lyase

DNWAFLYAQR LALKQELPLHVCFCLVPKFLDATIRHYGFMLRGLQEVAEECAELNIPFHLLLG YAKDVLPTFV  
VEHGVGGLVTD FCLPRIPRQWVEDVRERLPEDVPFAQVDAHNIVPCWVASPKQEYSARTIRGKIHAQLPEFLT  
EFPPVIRHPYP PSCPAEPIAWEACYSSLQVDRTVKEVEWATPGTAAGLAVLQSFIMERLKSFGSHRNDPNKAA  
LSNLSPW FHFQGVSTQRAILEVQKHRGKYKESVDVFVEEAVVRRELAENFCYYNENYDSVQ GAYDWAQTTLKL  
HAKDKRPFLYK LQELEQGTTHDPLWNAQLQMVREGKMHGFLRMYWAKKILEWTRSPEEALRF AIYLNDRYEL  
DGRDPNGYVGKVDALSPSPAGCLWSICGIHDQGWAERAIFGKIRYMNYAGCKRKFDV GQFERRYAPRM

>Grus\_ame\_NWH23941.1\_CRY1

RFLQLQLEDLDANLRKLN SRLFVIRGQPADVFPRLFKEWNI AKLSIEYDSEFPFGKERDAAIKKLASEAGVEVI  
VRISHTLYDL DKKIIELNGGQPPLTYKRFQTLISRMEPLEMPVETITPEVMEKCTTPVSDDHDEKYGVPSLEEL  
GFDTDGLPSA VWPGGETEALTRLERHLERKAWVANFERPRMNANSLLASPTGLSPYLRFGCLSCRLFYFKLTD  
LYKKVKKNSSP PLSLYGQLLWREFFYTAATNNPRFDKMEGNP ICVQIPWDKNPEALAKWAEGRTGFPWIDAIM  
TQLRQEGWIH HHLARHAVACFLTRGDLWISWEEGMKVFEELLLDADWSVNAGSWMWLSCSSFFQ QFFHCYCPVG  
FGRRTDPNGD YIRRYLPVLRGFP AKYIYDPWNAPE SVQKAAKCIIGVNYPKPMVNHAEASRLNIERMKQIYQQ  
LSRYRGLGLL ATVPSPNPNNGNGGLMGYS PGESISGCGSTGGHLFPASPGAQLGPGDGHTTVVQPCALGESHTG  
ASGIQQQGYCQ ASSILHYAHGDNQQSHFLQAGKRPNPEEETQSVGPKVQRQSTN

>Grus\_americana\_NWH22854.1\_CRY2\_prote

RFLQLQLEDLDN S LRKLN SRLFVVRGQPTDVFPRLFKEWGVTRLTFEYDSEFPFGKERDAAI IKLAKEAGVEVV  
IENSHTLYDL DRIIELNGHKPPLTYKRFQAIISRME LPPKPVSTVMSQQMETCKVDIQENHDDVYGVPSLEEL  
GFPTDGLAPAV WQGGETEALARLDKHLERKAWVANYERPRMNANSLLASPTGLSPYLRFGCLSCRLFYRLWE  
LYKKVKRNSTP PLSLYGQLLWREFFYTAATNNPKFDRMEGNP ICIQIPWDRNPEALAKWAEGKTGFPWIDAIM  
TQLRQEGWIH HHLARHAVACFLTRGDLWISWESGVRVFDLLELLDADFSVNAGSWMWLSCSAFFQQ QFFHCYCPVG  
FGRRTDPSGD YVKRYLPKLKGFP SRYIYEPWNAPE SVQKAAKCIIGVDY PKPMVNHAE TSRLNIERMKQIYQQ  
LSRYRGLCLL ASVPSCVEDLSGPVTD SASGQGCSTSTVMRLSQADQASPKRKHEGGEELCTEELYKRAKV TGL  
PAPEIPGKSL

>Gryllus\_bim\_BAX56238.1\_cry\_1

MTELSEVRKNAS V LWRHGLRLHDNPALQETLKDNDVFLPIFIFDGKTAGTNIIGYNRMKFLLES LQDIDNKL  
QEVGGKLSLIRGNPVEVFHF ISEKFNLRKICFEQDCEPIWQERDNAVKKFCLENKIECFEKVSHTLWDPYLVQ  
KTNGGVPLTF QMFLHTISVLGSPPRPIGDVDWTLVEFGTLTPLPFPNHLHIFQHFP TPEDFGIYP EEKNGDR  
IIQWIGGETQ ALIHLKERLKVEEDAFRKGYL LPNQARPDLLGPPSSQSAALRFGCLSVRRFYWSIQDIFTKIH  
GNNQVPNQHITS QLIWREFFYTMSVGNKYIDEMERNPICLNI PWKENTKGHLELWEQ GKTYGPFIDAVMRQLV  
QEGWIHHVARN AVACFLTRGVLWISWEAGLKFFLKYLLDADWSVCAGNMMWVSSSAFEQLLDCSHCMCPVNYG  
RRLDPWGEYI KRYIPELRNYPVEYLYEPWKAPLHVQE QAGCIVGKDYPQRMIDHLQASEKNRQYMEDIRNQLM  
NPPPHCRPSNEKETRE FMWCHDNCFDH

>Gryllus\_bim\_BAX56244.1\_cry\_2\_tran

MTDVYQQLPLAAARGAGGPPGYGAPPAKHTVHWFRKGLRLHDNPSLREGLKGASTFRCIFILD PWFAGSSNVG  
INKWRFLQLQLEDLDQSLRKLN SRLFVVRGQPADALPKLFKEWGTTNLTFEEDPEPFGVRVDQ NIMAMCREMG  
ISVVSRSVSH TLYRLESII EKNGGKPPLTYHQFQTVVASMDSPAAEPRITARAIEGIHTPLHDDHDDRFGVPT  
LEELGFDTEGL LPPVWTGGESEALARLERHLERKAWVASFGRPKMTPQSLQASQTGLSPYLRFGCLSTRLFYY  
QLTDLYKKIKK ACPLSLHGQLLWREFFYCAATNNPNFDRMNGNPICVQIPWDRNPEALAKWATGQTGFPWID  
AIMTQLREEGW IHHHLARHAVACFLTRGDLWISWEEGMKVFEELLLDADWSVNAGMWMWLSCSSFFQQQFFHCYC

PVRFGRKADPNGDYIRKYL PVLKNFPAKYIHEPWNAPE SVQRAARCIVGKEYSLPMVNHAVASRINIERMKQV  
YQQLSKYRGPPGLLA AV PSSQQPNRQSNTNNPCSKYSGG LGRIKQEEGDIVSDQEGKENNHKHHHTLHSLNQ  
QHN

>Guillardia\_the\_XP\_005829195.1\_GUITHDRAFT

MQRLLLESSRDIPSAREDKRPVIVWFRQDLRLHDNPALLFAAQSGRNVIPVFVHVEQDDENWLLGGA AKFWLH  
QSLTKLSESLERKYGSKLIIRAGSDTLAGLLDVMMETGASTLCFN RVYEPWKLARDAKIVETLT MNGLTCSY  
KAVVLFEPLEVVPDSKEGLMYGFGSVGFFLNACDGKEISDPLPPPEQLRPPRAWPGSLSIGDLRLYVMPCCR N  
GQVVDWAKGMREFWEFGE EGALKALEEFVRF GCHHFEGRQRFRA DRKYTAVISPYVRFGELSPRRI FHEIVVR  
HRYKAKTFLRRLAWRDLAYWCLWKFPPTMADHPLRPQYAHQTWDYDQKQLRAWQRGR TGFPPLVDAAMRQLWVTG  
WMPNYMRHV VAGFLIEHMMHWVDGEKWFHDTLVDADVA INAYMWQNGGHSGLDQWNFVMHPVFAAKSCDPEG  
DYVRRWVPELSKLPPEYIHCPEAPVTLLASSGVALGRNYPHRIADLEGARTRSLAAVNAVRCGVGKAMVLP  
DGHERMILPDGR

>Guillardia\_the\_XP\_005833658.1

MPVSVQ LLEALDDACKEEDQEKICDVLDR LQETDL DVDFIVKHVGKKVKLLRTHSSAEVKKK AVALTQFWKEV  
VKKKVESSGKGKGRAAVKVKEEEVKQEV DNAAKIGKDSIERSGKIAVLPERTRAINHKNVESC PKGKPVVYWM  
SRDQRVQDNWAMLYAQQQALEAGAPLAVCFNLVDSFLGAGLRQFGFMLRGLKEVEEEELKELNIPFFLLRGDCV  
KTIPKFVKDNNVGLVVPVWVASDKQEVGARTLRPKIHRLLPKFHHQNFPAVM SHPHPWKTSPPPTDFEAAKSL  
KCDESIPEVTWAKPGSAAGLENLSKFLMQKFKNFNTKRNDPSEEVLSDMSPWLHFGQVAPARCALEAKSFSKM  
HSESYASYIEELVVRRELSDNFCHYNKKYDSLEGCAGWAQETLKVHAGDKRPHVYSLAKLEEAKTHDDLWNAA  
QLELVHRGKM HGFM RMYWAKKILEWTSSPEEALKFAILLNDKYNLDGRDPNGFVGCMWSIGGVHDMG

>Guillardia\_the\_XP\_005838416.1\_induced\_by

MSGGRVVLWFRNDLRLTDNVLIAEASKRFLASNSALS VLPVYCFDPRFFAQSQYGPRKTGVLRAKFLLESVAD  
LKKRLQGVGSDLLVLVSGKPEV IIPRLMQSGEDTTVLAQEEVTDEELRVDRAVKRAIAPLGGKLHLLWGHTLFH  
RDDLPYRQGLTDMPDVFTPFKEACERKSKVRKCFYPVKGNLGVVPEDAKKLDEGLPSLES LGFSAQEVEGAA  
KPDPRSVLQFVGGESAGLDRIQH YIWKQDCLKDYFETRNGMIGADYSSKFSAWLAHGCISPRFIYEEVQRYES  
QRVKNKSTYWLIFELIWRDFFRYICMKH GNEVF KIGGIAHRSWKWE GEGEAFQRWVDGETGQPLVDANMRELK  
YTGFMSNRGRQNVASFLTQNLNVDWRLGAAYFEETLLDHDVTANWGNWMFAAGLSGGRINKFNILKQSKDYDE  
DGEYCRLWCPELRNVPVVKVHSPWQMSEKEQLDCNGQDVGQRAALPETRLREESR

>Gymnodraco\_acut\_\_XP\_034056367.1

MSTSRTIICLLRNDLRLHDNELFHW AQRNADHIVPLYCFDPRHYVGTYNYNLPKTGPFRLRFL LDSIRDLRHT  
LLHKGSNLVVRGKPEEVVADLIKQLG SVSTVAFHEEVSSEELNVEKRVKDVCAQMKVKVHTCWGSTLYHRDD  
LPFN NMSRLPDVYTQFRKAVESQSQXDPXSQHLSSXRPLPQGLEEGGIPTAEDLEQTEPVT DPRSAPFCTGGE  
SQALARLKHYFWDTNAVATYKETRNGXIGVDYSTKFSSWLALGCISPRYIYHQIQQYEKERTANQSTYWVIFE  
LLWRDYFKLVGVKYGIRLFQIKGLQEKSIPWKKDMKLFDAWKEGRTGVPFVDANMRELAMTGFM SNRGRQNV A  
SFLT KDLC LDWRMGA EWFEYLLIDHDVCSNYGNWLYSAGIGNDPRGENRKFNMIKQGLDYDNNGDYVRQWVPE  
LQIMGSDVHTPRTLSTASLSHANVCLGETIYPAPIVMAPEWSRHANKKPSGAGPSARGKKGPSHTPKQHRDR  
GIDFYFSKSKNL

>Gymnodraco\_acut\_\_XP\_034071310.1

MLHSICRSSSVFRVVTHTSYLDTTSVLSSKNKAFTCQAIMSEKKRKSTSA AAAAVKEPGAKQQKLDPTKEKGWL  
QDSLKQQR TKNKQMKFNKERLRFISNTERIKQSGEVLYWMTRDHRVQDNWALIHAQQ LALKEKLPLHVCFC L  
FVPKSELSTLRHYSFMLKGLKEVEKKCRSLDIQFHLLHGSAGDVLPGFVSDRELGA VVTD FSPLREPLQWLED  
VKKTL PKDIPLIQVDAHNIVPCWVASPKLEYAARTIRGKLT KLLPQFLTDFPLVEKH PYTTARTAKLIDWEKT  
LASLQLDRDVGEP EWAMP GTKGGVAMLESFIDERLKL FATQRNDPN IAGLSQLSPWIRFGHLSAQ RVALQVQS  
SGKCAGPSVATFIEELVVRRELT DNFCFYNEKYDSVEGTHDWAQKSLKAHAKDKREYLYTREQLEKAKTHDKL  
WNASQYQMITEGKM HGFL RMYWAKKILEWTSSPEEALSIALYLNDRYSLDGQDPNGFVGCMWSIGGIHDRAWG  
ERKVFGKVRYMNYKGCQRKFDVARFEKKYCPKNL

>Gymnodraco\_acut\_\_XP\_034081741.1

MVINTIHWFRKGLRLHDNP SLKDSL LGADTVRCVYILD PWFAGSSNVGINRWRFL LQSL EDLDSSLRKLNSRL  
FVIRGQPTDVFPRLFQEWNISRLSFEYDSEFPFGKERDAAIKKLACEAGVEVTVRISHTLYDLDKI IELNGGQS  
PLTYKRFQTLISRMDAVEEPADSITADIMGKCRTP LSENHDDKFGVPSLEELGFDTEGLSSAVWPGGETEALT  
RLERHLERKAWVAFERPRMNANSLASPTGLSPYLRF GCLSCRLFYFKLTDLYKKVKKNSSPPLSLYGQLLW  
REFFYTAATNNPCFDTMESNPICVQIPWDRNPEALTKWAEGR TGFPWIDAIMTQLRQEGWIHHLARHAVACFL  
TRGDLWISWEEGVKVFEELLLDADWSVNAGSWMWLSCSSFFQQFFHCYCPVGFGRRTDPNGDYIRRYLPILRG  
FPAKYIYDPWNAPEGVQNAAKIIGVHYPKPMVNHAETSRLNIERMKQIYQQLSCYRGLGLLASVPSISNGNG  
ETSSEGMGLSADGTHNAAAAPS GHQMGI PSQGDWQSGVNELMQGETQTSSSSQQQGYGNS SSM LCYSQGVQK  
IQKGPEHHVSTLSGGKRPCEDPRN GRGSKIQRQSTH

>Gymnodraco\_acut\_\_XP\_034088101.1

MAHTCIHWFRKGLRLHDNPALMAALRDCKELYPVFI LDPYIYNN TLVGINRWRFLIGCLKDLD CSLRKLNSRL  
FVVRGKPEEVFPKLF EKWKVTKLT YEYDTEPYSLSRDKTVTTLAKEHGVEVVYKISHTIHDMDRIIEENNGKA  
PLTYNRFR TILKTIGNPKKPI PAPAIEDTKDVKTPCSENHDKNDGIPTLEDLGHD TTTLGEEKFP GGQEALR

RLDENMARKDWCKFEKPQTSFNSLSPSTTVLSPYVTFGCLSAFTFWRVTEVYQGGKHSEPPVSLHGQLLWR  
EFYYAAGVGIPNFDKMEGNPVCTQVDWDTNHEYLAAREARTGLPFIDAIMTQLRQEGWIHHLARHAVACFLT  
RGDLWINWEEGQKVFEYLLHGDWALNAGNWQWLSASAFFHQYFRVYSPVAFGKKTDKNGDYIKKYLPLLKKF  
PAQYIYEPWKAPRSVQQAAGCIVGKDYPQPIVQHEVISKKNIQRMKLAYAKRSAESAESPQNQSPSKKQGVKRK  
AKSVIDMLQKKDKK

>Gymnodraco\_acut\_\_XP\_034089551.1

MAPSAAASEDRKALVRRMLIDVLMGREDPEGFFAMCVSAMGPQETRSQFLALIQPLSTANSSLHSGLTISIYEQ  
YFSKTEDELQLALALSLELVKNDQLSTPSQDSPLQPPRDRPNQRS PAQKSTVCQPQGNSNTKPADGVGRREH  
TITTQTEARVKASPLQTFRETELQKNNVDKYKMGTPGTSLARCVSSPSGLFLKQNTIEKGNQMRNEGDFNQPE  
TPKRSKNRRQRRKGAGQKVVGGLPCSPSAQPPVLLWFRDLRLGDNPALIGSLEVGSPIIPVFIWSPEEEEGPG  
ITVAMGGACTYWLHQALSCFSSSLERIGSHLVFLKANGSSSLCTLKELVRETGARTVLANALYEPWLKERDDDV  
ESDLQKDGVECKMYHSYCLRDYPYSVSTEGVGLRGIGSVSHFMNCCRQNPQSALGAPLDPPVSLPTPAYWPQGV  
SLNVLGLGRMPRRKDGTITIDWAANIRKSWDFSEGGACARLEAFLNDGVYRYEKESGRADAPNTSCLSPYLHFG  
QLSPRWLLWDAKGARCRPPKFQKRLAWRDLAYWQLTLFDPDWESLRPPYKALRWSSDRDHLKAWQGRGTGYF  
LVDAAMRQLWLTGWMNNYMRHVVASFLIAYLYLPWQEGYRWFQDTLVDADVAIDAMMWQNGGMCGLDHWNFVM  
HPVDAAMTCDPYGSYVRKWCSELAELPDELVHKPWKCPAPMLRRAGLVFGQTYPERIVTDLEERRSRSLQDVA  
LVRKEFGQYVDKRSKGLVPLPQRLVSEALGLSHRDDGVVTEGQQFLLPVITRMEFKHQLEDPDADAVSNPYN  
AVLKGYVSRKRDETI AFLNERDFTASVMYEGVQRKERLES DYRRIEGLPGLPAPRGGARPTAKDRFSVVP  
GAVSSLR

>Haemaphysalis\_long\_\_KAH9369986.1

MSLASQQQATPHQQAPGPGGAERHVVHFRKGLRLHDQPALRLGLQGARTCRVCYIILDPWFAGSSNAGLNKWR  
FLLQSLEDLDARLRKLNRLFVIRGQPADVFPKLFKEWRVTHLTFEKDPEPYGAIRDQSI SALANEMGVTVC  
EPSHTLYPLERILRHGGKAPLTYRQFQGVLSMEPPAPVPAPDALPRTPIDDDHDERFAVPTLAELGTFSI  
RNERPLTRHTVHLHAGFDTNLKDAVWPGGETEALTRLERHLERKAWVASFGSPKMTPKSLLASQTGLSPYL  
RFGCLSARLFYHQLADLYRKIKKSNPPLSLQGQLLWREFFYCAATRNPNDRMHNNPICVQIPWDVNAEALAK  
WANGQTGYPWIDAIMRQLREEGWIIHVARHAVACFLTRGDLWLSWEEGMKVFDELLLDADWSVNAGSWMWLSC  
SSFFQQFFHLYCPVRFGRKADPSGDFIRRYLPMLKHFPISKYIHEPWTAPESVQVAARCVGRDYP LPMVNHQD  
ASHVNLQRIQVYQQLTQCAKAPGKLLRSVLAKFQIRSTAIDVAFNDIYASLQR

>Halcyon\_sene\_\_NXD76476.1

DNWAFLYAQR LALKQELPLRVCFCLVPKFLDATIRHYGFMLKGLQEVAKCAELNIPFHLLGYAKDMLPAFV  
VEHGVGGLVTDFCPLRLPRQWVEDIRDLRPEDVPFAQVDAHNIVPCWVTS PKQEYSARTIRGKIHAQLPEFLT  
EFFPVIRHPYSPSCPT EPI TWEACYSSLQVDRTVTEVEWATPGTAAGLAVLQSFIAERLKSFGSHRNDPNKAA  
LSNLSPWFHFQGVSTQRAILEVQKHRGKYKESVDAFVEEAVRRELAENFCYNNENYDSVQ GAYDWAQTTLKI  
HAKDKRPFLYELQELEQGTTHDPLWNAQLQMVREGKMHGFLRMYWAKKILEWTRSPEEALRFAYLNDRYEL  
DGRDPNGYVGKLGCLWSICGIHDQGWAERPVGKIRYMN YAGCKRKFVDVGQFEHRYSPR

>Halcyon\_sene\_\_NXD77464.1

KVDYDVC SNYGNWLYSAGIGNDPRDNRFNMLKQGLDYDGDGDYVRLWVPEL RGIKGADIHAPWAL TSAALSQ  
AGVILGETYPRPVVTAPEWSRHITQRPQGRSPRAGRRGPAHPATQRKDRGIDFYFSPKKDA

>Halcyon\_sene\_\_NXD80752.1

RFLQLSLEDLDNSLRKLNRLFVVRGQPTDVFPRLFKEWGVTRLTTFEYDSEFPFGKERDAAIVKLAK EAGVEVV  
IENSHTLYDLDR IELNGHKPPLTYKRFQAIISRMELPKKPVSTVIRQQMETCKVDIQENHDDVYGVP SLEEL  
GFPTDGLAPAVWQGETEALARLDKHLERKAWVANYERPRMNANSL LASPTGLSPYLRFGCLSCRLFYRLWE  
LYKKVKRNSTPPLSLYGQLLWREFFYTAATNNPKFDRMEGNPICIQIPWDRNPEALAKWAEGKTGF PWIDAIM  
TQLRQEGWIHHLARHAVACFLTRGDLWISWESGVRVFDELLLDADFSVNAGSWMWLSCSAFFQQFFHCYCPVG  
FGRRTDP SGDYVKRYLPKLKGFPSRYIYEPWNAPESVQKAAKCIIGVDY PKPMVNHAETSRLNIERMKQIYQQ  
LSRYRGLCLLASVPSCVEDLSGPVTD SASGQGCSTSTMRLSQADQASPKRKHEGTEELCTEELYKRAKVTGL  
PAAEIPGKNL

>Halcyon\_sene\_\_NXD85396.1

MGVNAVHFRKGLRLHDNPALRECIQGADTVRCVYIILDPWFAGSSNVGINRWRFLQLCLEDLDANLRKLNRL  
FVIRGQPADVFPRLFKEWNI AKLSIEYDSEFPFGKERDAAIKKLASEAGVEVIVRISHTLYDLDKI IELNGGQ  
PLTYKRFQTLISRMEPLIPVETITPEVMEKCTTPVSDDHDEKYGVPSLEELGFDTDGLPSAVWPGGETEALT  
RLERHLERKAWVANFERPRMNANSLASPTGLSPYLRFGCLSCRLFYFKLTDLYKKVKKNSSPPLSLYGQLLW  
REFFYTAATNNPRFDMKMEGNPICVQIPWDKNPEALAKWAEGRTGF PWIDAIMTQLRQEGWIHHLARHAVACFL  
TRGDLWISWEEGMKVFEE LLDADWSVNAGSWMWLSCSSFFQQFFHCYCPVGFRRTDPNGDYIRRYLPVLRG  
FPAKYIYDPWNAPESVQKAAKCVIGVNYPKPMVNHA EASRLNIERMKQIYQQLSRYRGLGLLATVPSNPNGN  
NGGLMGYSPGESISGCGSTGGHVFPASPGAQLGTGDGHTVVQPCALGDSHTGASGGQQQGYCQASSILHYAHG  
DNQQSHLLQAGRTSLATGISTGKRPNPEEETQSVGPKVQRQSTS

>Halcyon\_sene\_\_NXD88195.1

MSHRTIHLFRKGLRLHDNP TLLAALESSEVLYPVYILDRKFMTSVMHIGPLRWHFLLQSLEDLQKNLGQLGSC  
LLVLQGEYESVLRDHIQEWNITQVTLD AEMEPPFYKEMEANIRRLGEELGFEVLSLVGHSLYDTRILD LNGGT

PPLTYKKFLHILSLLDGPELPVRNLTAEDFQRCGAPDPGLAEQYRVPLPVDLKMPLLENLSPWRGGETEGLQRL  
EQHLTDQVSPYCTWVLLVALAGLSLVSSSYMCLSPFAFTLYLVQAKHHSPPVSLQGQLLWREFFYTVASATP  
NFTQMVGNPICLQIRWYEDAERLHKWKMVMRG

>Haliotis\_rubr\_\_XP\_046546140.1

MSHKTIHWFRKGLRIHDNPALLAAVKDGEALWPIFILDWPFAXHARVGINRWRFLQLSKDLDENLKKVNSRL  
FVIQKPAEVFPGLFKQWEITRLTFEVDTEPYAVARDEEVQQLANEHGVVEVTEVSHTLFDVKKTIQKNGGSP  
PLTYQRLQTLISQMGAPSPVNTLTLEEMKDCRTPEADDTEYRVPTLEELDKCQDDLGNLYPGGETEALVRM  
ERYLKKTNWVCSFEKPKTEPNLQPSSTTVLSPYLKFGCLSARTFYFRLLDVYRVNKKHTQPPVSLHGQLLWRE  
FFYTVASGTANFDQMEGNSVCTQVPWDDNKELLEAWTQARTGYPFIDAIMTQLRQEGWIHHLARHAVACFLTR  
GDLWISWEEGQKVFEELLLDADWSL NAGNMMWLSASAFFHQYFRVYSPIAFGKKTDKNGDYIRKYLPLKLLP  
AEYIYEPWKSPLSVQKAAGCIIGKDYPKPIVDHDLVRKANIKKMASAYAKRKEMAGTTKKSQAQSPAKKRKSSA  
EEDGKKKKFKSGSKKMTDFFNK

>Haliotis\_rubr\_\_XP\_046567787.1

MSVNNIKAYNTEGQPYLSEHTMEERPEVFNKWEKGMTGFPWIDACMRQLRSEGWIHHVCRHAVACFLTRGDLW  
ISWEEGLRTFLTYLLDADWSVCAGNMMWVSSSAFERILQCSKCFCPVGYGRRIDPSGEFVRRYIPELKDMP  
FLYEPWKAPLEIQEKAKCVIGKDYPSPIVDHRKVSQNKEMMDAVMHVLKDKKISHCAPTSVEEVKTFVWVPE  
HTFCEMETDHHKV

>Haliotis\_rubr\_\_XP\_046571771.1

MWSCTKLIHCGTGWLRSRQGLHLTHRLSSSVLFLGRLSSAMSDKGKSSDLKRKAEEDSGSAEKKVKVEASKK  
SGDLLSDVIESRKSVCESVCKFKFNKKRVRLSSAAEFPPDDCDGVVYWMSSRDQVRVQDNWAFLYAQLAL  
KMEVPLHVCFCFLVPRFLEATIRQFGFMLKGLQEVEQECKTLNISFHLLIGYAKDVLPDFVKSNNIGGV  
TDFSPRLTPMTWVTDVKERLPKDIPMCQIDAHNVVPCWEASPKLEYGARTIRKKNHDKLPEFLTA  
FPPVCKHHPDAKVKSELVNWEAAYASLEVDRSVKEVDWATPGTKGGLKMLESFCKERLKYFNADRNNPN  
KNALSNLSPWIIHFGQISVQRCILTVKQYRSKGQESVNAFIEEAVVRRELADNFCFYNEHYDTIEGAYD  
WAKTSLKLHAGDKRPYLYSRQQLDGRTHDKLWNAAQLQMVNEGKMHGFLRMYWAKKILEWTCSPEDAL  
KDAIFLNDKYNLDGRDPNGYVGCMMWSICGIHDQGWKEREVFGKIRYMNYKGCTRKFDVPAFERKYK  
VKKI

>Haliotis\_rubr\_\_XP\_046575178.1

MNRKMASVTGTIICLFRNDLRVHDNEALHWAIKNGTHVLPLYCFDPRHYKGTYHFNFPKTGANR  
FKFLLESVALDRQSLQSKGSNLIVRVGKPEEVVPQLIECVGKNMVQGLVYQGEVTEEEELTVEQGLN  
KKCGVKVHTVWGHTLHHKEDLPFNPKNVPDVTYQFRKRVEEQAPVRSVIPTDRLKPLPPGIEEGT  
IPTPHDLGVQESTTDPRTAFPPFAGGETTGVARLQNYLWDTDHVAQYKETRNGMIGADFSTKFS  
PWLAHGCVSPRFIYSEIKKYEAKRTANQSTYWVIFELLWRDYFRFVALKYGNKIFFSGGILGKDI  
PWKKDMRQFEAWKSGTTGVPIYDANMRELLATGFMNSNRGRQNVASFLTDLKLDWRLGA  
EWFESMLIDHDVCSNYGNWLYSAGIGNDPRQDRKFNIQGLDYDAQGDYVRLWVPELSKVTG  
GDVHTVWALSNTVLSHAEVSLGETYPKLLVAPEWGRHSAKSRRGPQKGDKPQRNRGIDFYFKS  
S

>Haliotis\_rubr\_\_XP\_046585585.1

MSRPRKNTVHWFRKGLRLHDNPALREGIQDSTSYRCIYILDPWFAGASQVGINKWRFLLECLEDL  
DKSLRQLGSRLEFVIRGQPTVEFPKVFKEWNITHLSFEEDPEPFGKDRDASICSLATECGVKV  
IIRTSHTLYKLEDVIKMNNSTHPLTYKRFLSVLAQMKPPPMPEETIKPDLIGQSVTPVTL  
DHDEKYGVLEELGFDIDGIHPVIFRGGESEALTRLYRHLEKAWVASFEKPKMSPQSLF  
PSQTGLSPYLRFGLCLSPRLFYWKLRELYKKVKKGNPPALHGOQLLWREFFYTVATNNPN  
FDTMIGNPMCQIIPWDRNPEALAKWAEQGTGFPWIDAIMVQLRQEGWIHHLARHSVAC  
FLTRGDLWISWEEGMKVFDLLEDADWSVNAGTMMWLSCSSFFQQFFHCYCPVGFGRADPSG  
NFVRHYLPVLKAFPTKYIYEPWLAPESVQKAARCIVGKDYPLPIVNHAVVSRINLERIRQV  
FKRLTVKANLSIPRDLGSPFIKYTKEASQTAIKTHPSAEEGTAH

>Haliotis\_rufe\_\_XP\_046326325.1

MSRDQVRVQDNWAFLYAQLALKMEVPLHVCFCFLVPRFLEATIRQFGFMLTGLQEVEQECKTL  
NISFHLLIGYAKDVLPDFVKDNNIGGVVTDFAPLRTPMAWVTDVKERLPKDIPMCQIDAHNIV  
PCWEASPKLEYGARTIRKKITDKLPEFLTAFFPVCKHHPNAAVKSEPVKWEAAYASLEVDRSV  
KEVDWAIPTGKGGLQMLESFCKDRLKYFNADRNNPNKNAVSNLSPWIIHFGQISVQRCILTVK  
QFRSKGTESVNAFIEEAVVRRELADNFCFYNKHYDSIEGAYDWAKTSLKLHAGDKRPYLYSR  
QQLDGRTHDKLWNAAQLQMVNEGKMHGFLRMYWAKKILEWTRSPEDALKDSIFLNDKYNLD  
GRDPNGYVGCMMWSICGIHDQGWKEREVFGKIRYMNYKGCTRKFDVPAFERKYKVKKI

>Haliotis\_rufe\_\_XP\_046347788.1

MDYSGEEEHCRKHVTAMWFRHGLRFHDNPNTLIKALKTTKTFYPIFIFDGKVAGTSLIAYPRMT  
FLLECLHDLDTCKKYGSRLYVQGSPEVFSQIKKDWGITQIAFEQDTEPIWFERDKTVKDFCE  
ESHIEYVEEIGHTLWDPERVIELNKGSPPVTYGLFNQVTSILGPPRPVADPDFTGINLPVTPD  
HDQFRIPTGEELGVKKENDVLECQKQYIGGETQALKLLAGRIPVVEEKAFKMGFVMPNQARPNIV  
DPPLSMSPHLRYGCLSVRKFFWEIRDAHFRVCPNKLPEGATSQLIWREYFYTMSVNNIAYDT  
MKENPICLNIPWKKDPEMFNTWEKGMTGFPWIDACMRQLRSEGWIHHVCRHAVACFLTRGDLW  
ISWEEGLRTFLTYLLDADWSVCAGNMMWVSSSAFERILQCSKCFCPVGYGRRIDPSGEFVRRYI  
PELKDMPVFLYEPWKAPLETQKANCVIGKDYPKPMVDHRKVSKENKEMMDGMHFLKDKKISH  
CAPTNIEEVKSFVWVPQHTFCEMETDLKKL

>Haliotis\_rufe\_\_XP\_046351244.1

MNGIMASRTGTIICLFRNDLRLHDNEALSWAVKNGTHVLPLYCFDPRHYRGTYHFNLPKTGAHRLKFLLESVA  
DLRQSLQSRGNSLMVRVGKPEEVPQLIDSIGKTLVQGLVYQGEVTEEEELTVEQGLDKKCGVKVHTVWGHTLH  
HKEDVPFNPKNVPDVTYQFRKRVEDQAPVRSIIPTPDMCLKPLPPGIEEGTIPTPCDLGVEESTKDPRTAFPPFA  
GGETTGVARLQNYLWETDNVSQYKETRNGMIGADFSTKFSPLWAHGCVSPRFHSEIKKYEAKRTANQSTYWV  
IFELLWRDYFRFVALKYGNKIFFSGGIVGKNIPWKRDMRQFEAWKRGTGVPYIDANMRELLATGFMNSNRGRQ  
NVASFLTKDLKLDWRLGAEFWESMLIDHDVCSNYGNWLYSAGIGNDPRQDRKFNIVKQGLDYDAQGDYVRLWV  
PELSKVMGGEVHTVWALSNTVLSHAEVSLGETYPKPLLVAPEWGRHSAKSRGGTRGRGDKPRQNRGIDFYFKN  
S

>Haliotis\_rufe\_\_XP\_046364930.1

MLYGCTDRVISAMSHKTIHWFRKGLRIHDNPALLAAVKDGEELWPIFILDWPFNAKRVGINRWRFLQSLKN  
LDENLKKVNSRLFVIQGSPTFVFPGLFKQWEITRLTFEVDTEPYAVARDEEVQQLAHQHGEVVTEVSHTLFD  
VKKTIQKNGGSPPLTYQRLQTLISQMGAPPSPANTLTKEEMKDCRTPQADDTEKYSVPALEDLDKCVDELGP  
LYPGGETEALTRMERYLKKTNWICSFEEKPKTEPNLSQPSTTVLSPYLKFGCLSARTFYFRLLDVYRVNKKHTQ  
PPVSLHGQLLWREFFYTVGSGTLNFDMEGNSVCTQVPWENNKELLEAWTQARTGYPFIDAIMTQLRQEGWIH  
HLARHAVACFLTRGDLWISWEEGQKVFEELLLDADWSRTGGNWMWLSASAFFHQYFRVYSPIAFGKKTDKNGD  
YIRKYLPLKPKFPAQYIYEPWKSPPSVQKAAGCVIGKDYPKPIVDHDNVRKANIKKMAAAYAKRKEMATKEKS  
TSSPAKKRKSSAMDDGTGKKSRSGDKKMTDFFNK

>Haliotis\_rufe\_\_XP\_046370956.1

MSRPRKNTVHWFRKGLRLHDNPALREGIQDSFSYRCIYILDPWFAGASQVGINKWRFLLECLEDLDKSLRQLG  
SRLFVIRGQPTFVFPKVFKEWNITHLSFEEDPEPFGKDRDASICSLATDCGVKTIIRTSHTLYKLEDVIKMNN  
STHPLTYKRFLSVLAQMKPPPMPEETIKPDLIGHSVTPVTLHDHEKYGVLKLEELGFDIDGVHPVIFRGGESE  
ALTRLYRHLEKAWVASFEKPKMSPQSLFPSQTGLSPYLRFGLCLSPRLFYWKLRELYKKVKKGNEPPLALHGQ  
LLWREFFYTVATNNPNFDTMIGNPMCQIIPWDRNPEALAKWAEQGTGFWDIDAIMVQLRQEGWIHHLARHSA  
CFLTRGDLWISWEEGMKVFDDELLDADWSVNAGTMMWLSLSSFFQFFHCYCPVGFGRADPSGNFVRHYLPV  
LKAFTKYIYEPWLAPESVQKAARCIVGKDYPLPIVNHAVVSRTNLERIRQVFKRLTVKANLSIPRDLGSPIF  
KYTKGLTDVDVEASQAGIKAHPHTEEGTAH

>Halobacillus\_sp.\_KGW1\_WP\_062514897.1

MTKRAVWFRDLRLQDNTALAKALEHTKDGDELLFFHHPALNESFTARHDYFFQTLASFVEKAEDAGAPVH  
FITGDTEDAFENLIETAGIDMVYFNRDETGFGERDKQVEKYVTSLDVDVYHYLDHHIHGADEVKKQDGGFYK  
VFTPYLKKWKQLPKPAVQKVDELKKAADVDERASFKEGESAYADLLEKIKADFGGVEADAWARLEQFLDAD  
IYDYDERRDFPAVDGTSLSMSRYLRTGAISVRSVYHQIHDQVDFRKKTEGVETIYISELAWRDFYNMIYHFYPNA  
HDEEVVEKYQGIPWNNDEDVLERWKEGRTGFPIIDAAMRQLNESGWMHNRMRMAVASFLTKDLLMDWRKGERY  
FQEKLVYDYPASNIGGWQWAASTGTDVPYFRVFNPTRQSERFDPHGRFIKEWLPFLRDVPKKYIHEPAKMPE  
NEQEKAACMIGEDYPEPMVDHKKMRERAIQLFKDKS

>Halobacillus\_sp.\_WP\_062515076.1\_DASH\_famil

MQNGALVWFRDLRVHDHHPHQAQVQSGKPVIGMYVFDPAAYEQGEDGIRKTRHRARFLIESIHLRKNLGA  
LGIPLIVRCRRATEAIEHEIKEKIKIDAVYVHEEIGREEQTEENVQRALPDATFHVHGHNLVLPDDLFPFSIQ  
ELPDFTFSQFRKRLEKSGTAVRKAIAPPAPEGQAELPVPEGDIPTLETGLGDPADAPRYPGGSSEARKRLIDY  
IFTKDRDKIYKQTRNGMLKEDDSSKFSPYLANGCLSPRVVEYQIKAYERTNGANESTYMLYFELLWRDYFHLV  
HRKYGDRIFYRSLGSKAIPWERDEKLLQAWIDGKTGYPLVDAGMRELKETGFLSNRGRQNVASFFTKNLGLD  
WRIGARWFESQLVDYDVSSNYGNWLYIAGVGNDVFPFRAFNVKEQAKDYDPDGSYLRHWLPELAALPADWIHQ  
PREMGMIQQQYGIVLGEHYPLPVVDLYESMRKRKEAFAAADR

>Halobacterium\_hub\_WP\_059056769.1\_DNA\_photol

MQLFWHRRDLRTADNRGLAAAAESGEVVPVFCFDDVVDLHASPPRVAFMLDALADLRARYRDLSSDLLVRRGD  
PSAVLSDLAEYSADRVVWNHDYSGLARERDEAVRAALGDADVGHEQYHDAVFHEPGAIRTNAGDPYSVYTYF  
WKKWRDREKPDVPPEPSAGDFADVSGEELPTLADLGFAEPDAALPDAGTEAARELEREDFCEDAVFRIYEEARDY  
PAEAATSRLSQDLKFGTIGVRELYERTEDAMAEADNDEERASVEEYQGQLAWREFYAQVLYFNPVVSQNYKE  
YEQPIEWREDDAELAAWKRGETGYPIVDAGMRQLREEAYMHNVRMIVASFLTKDLLQDWREGYDHFREHLVD  
HDTANDNGGWQWAASTGTDAQPYFRIFNPTTQGERYDPDAEYITEYVPELDRDVPAEKIHAWPELDADERAALA  
PDYDPDPIVDHGERREQAISMFERARGDD

>Halteria\_gra\_TNV80968.1\_FGO68\_gene

MHRIIVWLRNDLRLVHDNSALNWAINKGIGKTTKQIIPVYTFDPRFMRNKVEKYGIYKCGLTRARFLQESVQNL  
RANLQDLGSQLLVLTQELPEVFLPKLILKGQNSIVFSQEVCEEARIEQSVATEIKRNSKVHIERVWGSTIHH  
IDDLQMDPENVAASSVYTKFRQNTERDIVERDCLPTSKLGQLPFIEGDVPKAIQDAMRFAPSLMDLGFSEEEANT  
PKDPRSSLEFVGGEDAGLERVKYYLWETKMIQKYKDRNALMGADFSSKLSPWMACGNLSPRYVYWETKKFEQ  
RFKENDSTRHFISELFWRDFCHWYAYCHGNGIFYEYGPLDKKGVQWRVDQSVIQRWRQGLTGMPLVDAALMRE  
MNQSGFMSNRGRQIVASYFSLDLKQDWRYGAHHFEEKLIDHDVHSNYASWNMIAGIGPKTNLFNVVKQSYDF  
DADGEFIRTWVPELNRNPTDYIHEPWKMPFKLQQQCETVLGTNYPNPIPSRYTTKPSHQSGGSGLYVKDY

>Hamiltosporidium\_mag\_TBU05018.1\_CWI36\_0685

MENRIIEMIENKNTKNILYLMQRDKRIHDNYSVLYSMELGNALSSEYFIGTILDEIKLNERQRTFVIEGLKEI  
EDECKEYNIYFYFLIDKLEEFCAQYNIDCIVTDFSPKLEFDFKFEKLRSLCKKHKYSFYVVDShnmvPCKLIPT  
YYKSSKAVKTRLYQKYNQYFKDFDTIKFYTNNDsKRCKEIKNNFPKTTVTNGFKGGYSNGMKEVESFFENRFE  
NYDKYRNKPDYDVLsNLSPWIVSGQISAQKVWLACHKFSNKNENLDtFLNEIFVWKETAEHFCLYNKDYDNI  
NGALPWAYSTLMVHQEDERNNIYTLEQLERATTHDDLWNAGQKEMLITGKMHGYVRMYWAKQILKWIQDPKKA  
VETAVQLNDKYSIDGNsPNGYLGVMMCICGSMDYGFAERPIIGKIRPMNAFKAPKYVAKWANKKI

>Helicoverpa\_arm\_ADN94465.2\_cry\_2

MSAAAETLPAPNARKHTPPATAAAPQPPSARRTNGKHIVHWFRKGLRLHDNPALREGLLDAATFRCVFIIDPW  
FASSSNVGINKWRFLQLCLEDLDSsLRKLNSRLFVVRGQPADALPKLFREWGTTALTFEEDPEPYGRVRDHNI  
MSKCREVGITVTSRVSHTLYKLDQIIERNGGKAPLTYHQFQALIASMPPPPPAEAPISAQMLNGATTPLNDH  
DDRFGVPTLEELGFETEGLKPPVWIGGESEALARLERHLERKAWVASFGRPKMTFQsLLASQTGLSPYLRFGC  
LSTRLFYYQLTELYKRVKRVRPPLSLHGQILWREFFYCAATRNPNFDRMEGNPICVQIIPWEKNQEALAKWASG  
QTGFPPWIDAIMIQLREEGWIHHLARHAVACFLTRGDLWISWEEGMKVFELELLDADWSVNAGMWWLSCSSFF  
QQFFHCYCPVRFGRKTDPNNGDFIRRYIPALKNMPTRYIHEPWWAPEAVQQSARCIIGRDYPMPMVDHsKASQV  
NIERIKQVYAQLAKYKPPQGTLPNPNVQRPNMVQSSPSPNSIITSINQsNYLCSQTPDPQPSPQIIIPYKDNDVV  
FQKPMNHRSMKPSFKQVVIVQKKQNTNVIQTVSNCTPQsKENYAVNGQMDNSYKTPINESLQSAKQENMTLKT

>Helicoverpa\_arm\_XP\_021184238.1\_cry-1\_X1

MLGGSVLWFRHGLRLHDNPSLHSALEEKGFPPFFPIFIFDGETAGTKLVGYNRMRYLLEALDDLDSQFKKFGG  
LIMLKGPNNVFRRLWEEFGIRKLCFEQDCEPVWRARDDSVKSACKEIGVVCREHVSHTLWEPETVIKANGGI  
PPLTYQMFLHTVATIGDPPRPVNIDFTGVKFGSLPECFYQEFTVYDKTPKPEDLGVFLENEDIRMIRWVGGE  
TTALKQMQRSLsVEYETFLRGsYLPthGNPDLLGPPISLSPALRFGCLSVRSFYWAVQDLFRQVHQGRLTNS  
ASHFITGQLIWREYFYTMSVNNPNYQGMAgnPICLDIPWKNPEGDELQRWVEGRTGFPPVDAAMRQLRTEGWL  
HHAARNTVASFLTRGTLWLSWEHGLNHFLKYLLDADWSVCAGNMMWVSSSAFEALLDSGECACPVRLGQRLDP  
SGEYVRRYVPELARMpVEYIYEPWKAPIDVQERATCVIGKDYPAPVVNHLVAAQRNKNAMKwLSRTVADRLQK  
DSWLDIVGELRHMLQKAPPHCCPSSSEDEIRQFMWLNE

>Helicoverpa\_arm\_XP\_021185587.1\_photolyase

MRFPYLPsLIRTVNMASAPKKIKLSQTKLTSKSSSENKESNSNVEEFMKKLQDKREDTAKSILEYKFNKKRVR  
IISLEQMVPDKCEGVVYWMsRDSRVQDNWAFLFAQKLALKNEVPLHVCFCIAKYLDASVRQDFDLVKGLEKV  
AADCKKLNIHFHLLEGSGAEVLPQWVVKHNIGAVVCDFNPLRVPLGWLdGVKKKLKKGVPLIQVDAHNIVPCW  
VASDKQEYSARTIRNKINSKLDEYLTEFPPVIKHPYTAKFEPEPIDWDEAIVSREADKNVGPVEWARPGYDNA  
IKMLKSFLDQRLKVfATKRNDPTMNALSNLSPWFHFGQISVQRVALCVQQQKSCTESVNSFLEEAIVRRELA  
DNFCFYCEHYDSIKGASNWAQKTLDDHRKDKRTHIYTLEQLANSETHDDLWNSAQIQLVKEGKMHGFLRMYYA  
KKILEWTPSVFGKIRYMNYDGCKRKFDIAFIARYGGKVHKYVPKK

>Helicoverpa\_arm\_XP\_021188646.1\_cry-1

MTKVPSVIHwFRLDLRIHDNLALRNAINEAENRKHHLRPVYFIDPDIKSKVGINRLRFLVQSLQDLNENLKKL  
NTRLYIIRGNAVEELPKLFKKWQVKYLTsQVDIDPIYVKQDEIIDKIAEKSDIFIVRRVQHTVYDVHsVLKKN  
NGSVPLTYQKFLSLVQDVQVKECIEITKAVSDDCKPKDFDSKQYDVPNLDELDDIDETALQPLKYPGGETEGVK  
RLHMYMAKRDWVCKFEKPNSSPNSIEPSTTVLSPIYSHGCLSAKLFYHKLQEAALSGRKHSEPPVSLLGQLMWR  
EFYYTAGAGTENFDKMVGNPVCTQIPWgKNDEHLKAWAEGRTGYPFVDAIMRQLKQEGWIHHLARHMVACFLT  
RGDLWISWEEGAKVFEDYLLDYDWSLNAGNMMWLSASAFFYKFFRVYSPVAFGKKTDKEGLYIRKYVPKLKY  
PTAFIYEPWKAPKNVQTTAGCIIGKDYPKRIVDHDTHKENCQKMSVAYKLNKERKALKRPLT

>Hemibagrus\_wyck\_KAG7320415.1

MVVNTIHWFRKGLRLHDNPSLKESIRGADTVRCVYILDpWFAGSSNVGINRWRFLQLCLEDLDAALRKLNSRL  
FVIRGQPTDVFPRLFKEWNItrLSYEYDSEPFgKERDAAIKKLASEAGVEVTVRISHTLYDLDKIIELNGGQS  
PLTYKRFQTLISRMEAVETPAEAITAeVIGSCTTPLSDDHDEKFGVPSLEELGFDTegLSSAVWPGGETEALT  
RLERHLERKAWVANFERPRMNSNSLLASPTGLSPYLRFGCLsCRFLYFKLTDLYRKVKKNSSPPLSLYGQLLW  
REFFYTAATNNPRFDKMEGNPICVQIPWDRNPEALAKWAEGRtGFPWIDAImTQLRQEGWIHHLARHAVACFL  
TRGDLWWSWEEGMKVFEELLLDADWSVNAGSMMWLSCSSFFQQFFHCYCPVGFGRRTDPNGDYIRRYLPVLRG  
FPAKYIYDPWNAPESVQKSACKVIgVHYPKPMVHHAESRLNIERMKQIYQQLsCYRGLGLLAMMPRTLLHP  
LGGDITPALYRPLGNVTVRTLVMPQAQKSRDSTVLKQVPTCDHTVLELTDTHIH

>Hemibagrus\_wyck\_KAG7329621.1

MVVNSVHwFRKGLRLHDNPALQEALNGADTARCVYVLDPWFAGAAANVGvNRWRFLLESLEDLNRSLRKLNSRL  
FVVVRGQPADVFPRLfKEWNVTRLTfESDSEPYGKERDGAIIKMAQEFsVETIVRHsHTLYNPDRIIEMNNNNP  
PLTFKRFQAIVSRLLELPKKPLPTITPEQMANCSTQVSENHDEHYAVPSLEELGFKTQGAGVPVWRGGETEAL  
RLNKHLDRKAWVANFERPRIKAHSLFASPTGLSPYLCFGCLSSRVLYYHLRELYMKLRRSSPPLSLFRQLLW  
REFFYTAATNNPSFDRMEGNPICVQIPWDRNPEALAKWAEGRtGFPWIDAImCQLRQEGWIHHLARHAVACFL  
TRGDLWISWESGMKVFEELLLDADWSVNAGSMMWLSCSAFFQQFFHCYCPVGFGRRIDPSGDYIRRYIPELKD  
YPSRYIYEPWNTPEsIQKAANCIVGVDPKPMINHAESSRLNIERMKQVYQQLSHYRGLSLLASVPTIQEEAE  
PSMSDDSQASSSGAISTSHQpQLQSEPQPSQTDPDPNPDPDPDPEPSSLSAPQAVTEQMVKEN

>Hemibagrus\_wyck\_KAG7329789.1

MAERKRNLKRKGEPLKGAEKLSAARGAEREAGWLQEKVAEIRRNSTECKFNMKRLRFLSDAQKVRQGC GAVLY  
WMARDQRVQDNWALVYAQQALALEEKPLPHVCFLVPRYLDSTYRQYAFMLKGLQEVAKECTSLDIQFHLLSGE  
PELTLPGFVKHWDIGGVVTDFSPLRLPLQWTERVKKELPPDVPIQVDAHNVVPCWEASNKLEYAARTIRGKI  
TKLLPEFLTEFPPVEAHPHTSTKTAKKVNWEEVMSSLEVDRSVGEVWVAQPGMAGGVAMLESFIDKRLRLFAT  
ERNPNADALSQSPWIHSGQLSAQRVLLEVQRWGKRLTESVASFKEELLVRRELSDNFCFYNDNYDNINGAY  
DWAOKTLQDHAKDSRPYLYTREQLEHAETYDQLWNAQAQRQLVLEGKMHGFMRYWAKKILEWTSSPEEAVNIS  
IYLNDRYALDGCDPNGYVGCWWSICGIHDQGWAERHIFGKVRYMNYAGCKRKFDVGQFERRYTGKA

>Hemiprocne\_coma\_\_NXG55160.1

RFLQSLLEDLNSLRKLNLSRLFVVRGQPTDVFPRLFKEWGVTRLTFEYDSEPFGKERDAAIVKLAKEAGVEVV  
IENSHTLYDLDRIIELNGHKPPLTYKRFQAIISRMELPKKPVSTVMSQQMETCKVDIQENHDDVYGVPSLEEL  
GFPTDGLAPAVWQGGETEALARLDKHLERKAWVANNEYKPRMNANSLASPTGLSPYLRFGLSCRLFYRYLWE  
LYKKVKRNSTPPLSLYGQLLWREFFYTAATNNPKFDRMEGNPICIQIPWDRNPEALAKWAEGKTGFPPWIDAIM  
TQLRQEGWIHHLARHAVACFLTRGDLWISWESGVRVFEDELLLDADFSVNAGSWMWLSCSAFFQQFFHCYCPVG  
FGRRTDPSGDYVKRYLPKLLKGFPSRYIYEPWNAPEVQKAAKCIIGVDYPKPMVNHAETSRLNIERMKQIYQQ  
LSRYRGLCLLASVPSCVEDLSGPVTDASASQGCSTSTAMRLSQADQASPKRKHEEAELCTEELYKRAKVTGL  
PAAEIPGKSL

>Hemiprocne\_coma\_\_NXG58024.1

MGVNAVHWFRLRLHDNPALRECIQGADTVRCNGNLFLEAAFS DGSSVVLVIRWKKFLLQCLEDLDANLRKL  
NSRLFVIRGQPADVFPRLFKEWNIAKLSIEYDSEPFGKERDAAIKKLASEAGVEVIVRISHTLYDLDKIIELN  
GGQPPLTYKRFQTLISRMEPLEMPVETITPEVMEKCTTPVSDDHDEKYGVPSLEELGFDTDGLPSAVWPGGET  
EALTRLERHLERKAWVANFERPRMNANSLASPTGLSPYLRFGLSCRLFYFKLTDLYKKVKNSSPPLSLYG  
QLLWREFFYTAATNNPRFDKMEGNPICVQIPWDKNPEALAKWAEGRTGFPPWIDAIMTQLRQEGWIHHLARHAV  
ACFLTRGDLWISWEEGMKVFEELLLDADWSVNAGSWMWLSCSSFFQQFFHCYCPVGFGRRTPNGDYIRRYLP  
VLRGFPAKYIYDPWNAPEIQKAAKCVIGVNYPKPMVNHAEEASRLNIERMKQIYQQLSRYRGLGLLATVPSNP  
NGNGNGGLMGYS PGESVSGCGSTGGHLFSSSPGAQLGTGDGHTVVQPCALGDSHTGASGIQQQGYCQASSILH  
YAHGDNQQSHLLQAGRTTLGPGISAGKRPNPEEETQSIGPKVQRQSTS

>Hemiprocne\_coma\_\_NXG60909.1

DNWAFLYAQRLLALKQELPLHVCFLVPKFLDATIRHYGFMLRGLQEVAEECAELNIPFHLLLGyakdVLPtfV  
VEHGVGGLVTDfCPLRLPRQWVEDVRERLPEDVPFAQVDAHNIVPCWVASPKQEYSARTIRGKIHAQLPEFLT  
EFFPVIRHPYPASCLAEPIAWEACYSSLQVDRTVKEVEWATPGTAAGLAVLQSFIKERLKSFGSHRNDPNKAA  
LSNLSPWfHFQGVSTQRAILEVQKHRGKYKESVDAFVEEA VVRRELAENFCYNNENYDSLQGSANDWAQTTLN  
LHAKDKRPFLYKQLQELEQGTTHDPLWNAQQLQMVQEGKMHGFLRMYWAKKILEWTRSPEEALQFAIYLNDRYE  
LDGRDPNGYRANTPACPAGCLWSICGIHDQGWAERAIFGKIRYMNYAGCKRKFDVGQFERRYAPCT

>Hemiprocne\_coma\_\_NXG63048.1

KVDYDVCsNYGNWLYSAGVGNDPRDNRKFNMIKQGLDYDNGNDYVRLWVPELQGIKADIHTPWALNSAALSQ  
VGVALGDTYPQPIVTAPEWSRHVSQR PQGRSPHPRGRGPAHSPMQHKGRGIDFYFSRKkDV

>Hemiprocne\_coma\_\_NXG64473.1

MSHHTIHLFRKGLRLHDNP TLVAALESSEVIYPVYILDGKFMTSVMHIGTLRWQFLLQSLLEDLQKNLCQLGSS  
LLVIQGEYESVLRDHVQRWNITQVTLDAEMEPFYKEMEANIRRLGDELGFVLSLVGHSLYDTQRILELNGGS  
PPLTYKRFLHILSLLDGPEVPVRSVTAEDFQRCRPPDPGLAECYKVPLPVDLKI PLESLSPWRRGGETEGLQRL  
ERHLTDQGWVTSFTKPRTI PNSLLPSTTGLSPYFSLGCLSVRTFFYRLSNIYAQAKDHS LPPVSLQGQLLWRE  
FFYTVASATPNFTRMAGNPICLQISWYEDAEQLHKWKTAQTGFPPWIDAIMTQLRQEGWIHHLARHAVACFLTR  
GDLWISWEEGMKVFEELLLDADYSINAGNWMWLSASAFFHQYTRIFCPVRFGKRTDPQGHYIRKYLPI LKNFP  
SKYIYEPWTASEEEQKEAGCII GQDYPPFMVNHTEASAHNLQRMQQVREEQHRTAQLTRDDTDDPMEMKVKRD  
HSEANVSRGKVARMTE

>Hemiprocne\_coma\_\_NXG65597.1

MQHSSIHWFRKGLRLHDNPALLAAATDCHRLHPLFILHPSSIRAGANARRFLLDALQDL DSSLQKIGSRLFVA  
RGCPEEVFPRLFRAGWTRXGGRGGVEHKAVSHGVEVIREVSHTLYDTERVLALNDGKAPLTYKHLQSLLASL  
GPPEKPAPVLTQEHLQGCCTPCQASHDINYG IPTLEELGHDPTEVG PQLYPGGETAALARLD MF MERTAWVCS  
FRKPETEPTSLHPSTTVLSPYLT LGCLSVRTFWWQLDGVYQQQKHSQPPVSLHGQLLWREFFYTAGASIPNF  
DRMVGNPVCLQVNWDDNPQHLCAWREGRTGYPFIDAIMTQLRTEGWIHHLARHAVACFLTRGDLWISWEEGLK  
VFEELLIDADWSLNAGNWLWLSGSAFFHRYFHVYSPIAFGKKTD RDGAYIRKYLPI LKDFPTEYIYEPWKAPQ  
AVQEHARCLVGT HYPRIVEHGAARERNLERMK

>Henneguya\_sal\_KAF0990424.1\_HZS\_876

MRRALSKLGCVP SRKKSSSHKKHGESIDESKTVEYYRSKREHCKSPLECDFNKSRIKILNGCTEIRDLESTV  
MYWMNRDQRVQDNWALIFAQRLLAAKYEIPLRVCFCLDKSYMNYSFRHYDFLIKGLELVHIELSHLNIPFHVV  
LGDVPTNVLDLVSQNNVSALITDFCPIDPPKRWINQLRRSLPNDVSLCLVDAHNIIPAWITSDKREYAARTIRP  
KIRKLLDEYLTEFPPIIKHQWNKSAIEFFAFVKDSYDYDFV KENEYVDPIDWAQPGYAQGLVCLEDFIHRLPE  
FAFFRNNAASEGTSNLSPWLHFGHLSAQRAILRVMDFIDEYKKHVDVFVEEALIRRELSENYCLYTEEPSDPS

SAPTWAIETLNKHMEDKRPYIYNLDQLEKCSHDPINWAAQNQLKTKGKMSGYLRLMYWAKKILEWSRNASAAAL  
ANSLYLNDKYSIDGNCNGIVGCMWAIYGVHDRAWAERKVFVGKVRFMSEVGCNRQFNVKEYIEKYGINV

>Hepatospora\_eri\_ORD99805.1\_PHR

MEQTKKVVSSTFKDVSMDKRVEKLNDVEDNKNVLYFMGRDKRIHENHSHVILGYQISDKLKSELYLGCNLDQI  
KKNDRLQKFIVEGLKSMEIDAKKYNLNFYLIDSLKMFIKENNVGVIIIDFSPLREYVVRDKEIKKICKDLNIS  
LYRVDSHNLVPAKLLDVYKRTGASVKIHLNKKMSEFLVNYPKLPHKYNKVVDVKNEYPNHNYKFSYILKGGY  
EKGMEEYQSFIKNKFEKYPSENNPDKNVLSNLSPYLNTGFISPIEIIIRTLEKYHDTEKCEIFLNEVFIWRE  
TSEHFVLHEKNYDNIDGALKWAKETLLEHALDKRPKAYTKEQLRNGETQDELWNAAQHQMVRGKMHGYCRM  
WAKTLRWFEPEALKIAIEFNDEYQMDGNDPNGYTGIMWSICGSMDRAFKEKEFFGKIRSMKSFKCPKYLKK  
YSK

>Hermetia\_ill\_CAD7078538.1\_unnamed\_pr

MYVKIETERLNFIRLNQAKLRSEYIHLRDAIDTEGNTANIGRLIILPATYIGSPRHMHEYAQDAMTYIRHCG  
RPDLFMFTTCNPKWIEIVQLLLLPGQTSSDRPITARVFRQKLRLSLMNYIVKQRVLGDTRCWMYSIEWQKRGLPH  
AHILILWLVERIQTDQIDDIITAEIPDHEADPDLHDVVITNMIHGPGCAINTESSCMVDGNFYLTDLQISRFB  
ILHAMKRSATGVTKTPSNSSQKSAKPNNQDGFSPSTESGFLKTIEESRVKTASSVLEFHFQKKRVRVLTEATE  
VKESAGSILYWMSRDCRVQDNWAFLLFAQKLALKNRLPLHVCFLVPKFLDATIRHYKFMLKGLQEVQCQECKDL  
DINFHLLLGSGGEKIPEFVKEMEVGAVVCDFSPLRVPLKWLDDVKNNLQEDVPLCQVDAHNIIVPVVWTSQKQ  
YAARTIRNKINGKLDVYLTEFPPVIKHPFVDREYNDVDWPGAFNSLECNREVEEVDWAQPGYKAACRVLETFC  
SSRLKLFNSKRNDPTVNALSNLAPWFHFGHISVQRCVLAVRDYKSKYPESVAAFCEEAIVRRELSNFCFYNE  
HYDSLKGLASWAEKTLSDHRKDKRTYIYTDELENAKTHDDLWNSAQIQLVKEAKIHGFLRLMYWAKKILEWTE  
SPEKALQVAIYLNKYSLDGRDPNGYVGCMMWSIGGIHQWREREIFGKIRYMNNDGCKRKFDVPAFVARYGG  
KVYSKKK

>Hermetia\_ill\_XP\_037903861.1\_LOW\_QUALIT

MSTTNAGKQTIHVHFRKGQRIHDNPPLKKACALVNANPEKYVLRPIFILDPIPRWMTVGANRFRFLQESLVQ  
FNDNLKAINSRLYVVRGTPSDVFPRLFEERWVKVLTTFESDIEPYAKKRDAEVRKLADECDVEVIVENSHTIYD  
PYKVLMLNSGRPIINYSRFQAVIAKLPAAEVPVTPDPIKCSPLKDFIEEKNGVCYDVPSLEQIGVDVNSLGP  
SKFPGGETEALSRMEHHLKNTIEWICSFEENPTFPNSLEPSTTVLSPYLKFGCLSSRLFYKXLTIELAKNKKHS  
KPPVSLVGQLLWREFYYSAAAGEPNFDKMEGNRICYQIPWTSNPEYLEAWTYGRTGYPFIDAIMRQLRQEGWI  
HHLARHAVACFLTRGDLWISWEEGQKVFEELLLDADWALNAGNMMWLSASAFFYQYFRVYSPVVFQKKTDKDG  
KYIRKYVPELKNYPASLIYEPWKATVAQQKLYGCVVGKDYPKRIVVHEEVYKKNLEKMSKAYKVNKELLAKGK  
EETGYGVSSKASGVKRKYEEDEDEC

>Hermetia\_ill\_XP\_037923019.1\_cry1-like\_

MSAPQVERTNPNIENNVVRPINGERHTVHWRKGLRLHDNPALREGLIGATTFRFCVVIDPWFAGSSNVGINK  
WRFLQLCLEDLDRSLRQLNSRLFVIRGQPADALPKLFKEWGTCTLTFEEDPEPFGKVRDKNVIEMCRELKIEV  
IVAVSHTLYKLDTIERNAGRPLTYHQFQAIIAEMKPPAKPEEAENSENIGNVYTPMSEDHDDKYNVPTLYE  
LGFDTGLKPPVWVGGETEALARLERHLERKAWVASFGRPKMTPQSLLASQTGLSPYLRFGLCLSTRLFYHQLS  
GKFQNLKYKKIKGNPPLSLHGQLLWREFFYCAATRNPFDKMEGNPICVQIPWDKNCEALAKWANGQTGFPIWI  
DAIMTQLREEGWIIHHLARHAVACFLTRGDLWISWEEGMKVFEELLLDADWSVNAGMWMWLSCSSFFQQFFHCY  
CPVRFGRKADPNGDYIRRYLPVLKNFPTKYIHEPWNAPEVQRAAKCIIGKEYSLPMVNHAVASRTNMERLKQ  
VYQQIAKYRPQDDESSMKGGSAPGMLAAARAQCGTMTNIVSSPSPTTVITNINSENNYICQQQQQAPNSGH  
VNLVTNNHQQTARSRYIITKREYDFSKQESLTVTSTSGYIQHPEQPPHQKSGYDKSILGENFQYNENIKNQOE  
RNNQHYNRMTISDLNNEQNIKSEGLTADVLTYRKQYINHSVVVHYGYNSNECTNELSYDNYRNEYPGSNHDT  
LQIYHQQQQHQQQQQLQQQHQMHPQHDLSLNNLSNVHQQLQQQMKTEANEIKAPNFKCDLDENSK

>Hermetia\_ill\_XP\_037923127.1\_cry1

MYNNSCDGNITVGPSVLWFRHGLRLHDNPALLAALENKHKGSQFLPIFIFDSESAGTKLIGYNRMRFLLTALAD  
LDQQFKAQGGQLYFLQGKPSIEIFRRLWEECAISTICYEQDCEPIWRERDSSVENLCHDIGVNCIEKISHTLWN  
PQAVIQANGGIPPLTYEMFLHTVETLGLPSRPVNPNNWNEVKFFKLPEKMLKEFQAFSKPPNPEDFDVYFENC  
DSDVTEAWIGGETKALENLRYRLKVEENAFQRGFYLPNHTHPDILGPSRSLSPHLRYGCLSIRRFYWDLHDLF  
EEVKRMNGAHSPSGPHITGQLIWREYFYTMSVNNINYAQMKNNDICLNIPWAVPKGDEFERWKAGKTGFPLID  
AAMRQLLSEGWLHHILRNTVASFLTRGALWLSWELGLQHFLKYLIDADWSVCAGNMMWVSSSAFEKLLDSSLC  
TCPLSLARRLDPNGDYIKRYIPELRCLPKYIHEPWNTPLEVQEACGCVIGVNYPEPMLDLQTASMKNAQAMR  
FLRDTLIAGGAPKEGPPHCRPSNEHEIRQFFWLVE

>Hermissenda\_cra\_AWY10932.1\_non-photor

MKESLQDRLGHKNKKHVLFWFRKGLRLHDNPALYSALVEGGVASTYRCVYILDWPFAGASQVGINKWRFLLE  
SLEDLDNSLRKLNNRLFVARGQPADILPRLFQEWGITTLAFEEDSEPFGERDVALSTMAREFHIQVISKSSH  
TLYNPKTVIAANGNSPPLTYKRFQSILSSLDPPAQPCETVSGQVVKDSVTTISDDHDDRFSVPTLDELGFDT  
TLGPAKFQGGESEALARLYRHLERKAWVASFERPKMSPQSLYPSGTGLSPYLRFGLCLSPRTFYWKLTELYKKV  
KKGIDPPLALHGQLLWREFFYTVSTNNSKFDMMGNSICVQIPWEHNPEALAKWAEGMTGPWIDAIMVQLRK  
EGWIIHHLARHAVACFLTRGDLWISWEEGMKVFDDEMLLDADWSVNAGMWMWLSCSAFFQQFFHCYCPVGFQKRA

DPSGDFVRQYLPVLKNMPTQYIYEPWTAPESVQKAAKCVVGKDYPLPMVAHAEQSHINLERMRQVYKRLVLKS  
TASKRIFLDLPKIPKVGMFLSKAKMFLSSSSDEEGSSKPRRRKQIDSTAA  
>Hermisenda\_cra\_AWY10935.1\_photorecep  
MGSTDNENRNVTVHWFRHGLRLHDNPALLEGLENCQEFYPIFIFDGSVAGTKTAGYCRMQFLLLESLKDLDLDS  
LRAKGSRLYVMEGDPLQIFPNLFEEWKVNMLTFEQDPEPIWQERDDNVKDLCDSDYNVEWIERVSHTLWDPHSI  
LKANGGSPPLTYAMFCQVAEIVGQPPRPVEDLDFSNVILPVSDNHDRLFGLPTLEKLEVADCDQAQKSPFCRY  
LGGEAKALVLLESRLDKERKTFSIGQAQANQMYPDLTGMPMSLSPHLRFGSL SIRKFYWALRDAFAEIHPESE  
IPLQVTSQVLVWREYFYCMSVNNPFYNRMAENPICLNIDWYTDDTSLEKWTEGKTGYPFIDACMRQLKQEGWIH  
QVCRHAVSCFLTRGDLWIDWQKGLEVFDRYLLDADWSVCAGNWMWVSSSAFEKVLQCSRCICPVRYGRRMDPN  
GDYIRRYVPELKNIPITYLYEPWKAPIAVQEGANCIIGTDYPPPIVDHRAASRDCKQKMEIIKAKYKDTPHVA  
PANEDVIALIWMTKDKEENRYSCDHSEERCNADAI  
>Hermisenda\_cra\_AWY11209.1\_6-4\_photol  
MAQHRSIHWFRKGLRLHDNPGLKACEQASEIYPVFILDPWFLKSGHCRVGSNRWRFLFQALEDLDNSLKSLN  
LRLFVVRGNPCRQLEILCKKWKISRVTFEVDTEPYAVTRDEDIERRLTELGIEVHKCVSHTLFDATAKVVKANG  
GSPPLTYQRFQTVLSK  
>Hermisenda\_cra\_AWY11212.1\_cry\_dash  
MASTSSRSAAIVLYRNDLRIHDNEALFLANKNHSQVLPVYCFDPRHFQGTYHYNFPKTGRHRAKFLLLESVADL  
KSSLQSRGSDLVVRGKPEDVPELITNLKLGKDTLVLLQKEVTDEEVQVEKALQSSVGVTVSTVWGHTLHHL  
DDLFPQPRNLPDIYTQFRKSVEDNTPVRKCFQLPDKLPLPSNVDPGVLPITIQKLGLSEPEPHPKSSFPFNGG  
ESTALSRLHHYLWGSQDVATYKDRNGMIGADYSTKFSSWLAHGCI SPRQIYWDIKKYESERTANQSTYVWIF  
ELLWRDYFRLVALKFGNKIFFSSGIKGGNVNWKKNALQFKAWQEGHTGVPIIDANMRELEATGFMSNRGRQNV  
ASFLTDLKLLDWRLGAEFESMLIDHDVCSNYGNWLYSAGIGNDPRENKFNWVVKQGLDYDADGAYVRTWVPE  
LSKVKSGQVHCWVTISQMGDLAAGVSLGETYPHPVMAPEWSRHVNRPGSSSSRGRGRGQGRGAGRHHDNSRS  
GQQRGMDFYFKNSNPR  
>Herpetotheres\_cach\_NXK06702.1  
RFLQSLLEDLDNSLRKLSSRLFVVRGQPTDVFPRLFKEWGVTRLTFEYDSEPFGKERDAAIVKLAKEAGVEVV  
IENSHTLYDLDRILNGLHKPPLTYKRFQAIISRMELPKKPVSTVISQOMEACKVDIQENHDDVYGVPSLEEL  
GFPTDGLAPAVWQGGETEALARLDKHLERKAWVANYERPRMNANSLASPTGLSPYLRFGCLSCRLFYRLWE  
LYKKVKRNSTPPLSLYGQLLWREFFYTAATNNPKFDRMEGNPICIQIPWDRNPEALAKWAEKGTGFPWIDAIM  
TQLRQEGWIHHLARHAVACFLTRGDLWISWESGVRVDFELLLDADFSVNAGSWMWLSCSAFFQQFFHCYCPVG  
FGRRTDPSGDYVKRYLPKLKGFPSRYIYEPWNAPESVQKAAKCIIGVDYPKPMVNHAEYSRLNIERMKQIYQQ  
LSRYRGLCLLASVPSCVEDLSGPVTDASAGQGCSTSTAMRLSQADQASPKRKHEGAEELCAEELYKRAKVTGL  
PAPEIPGKSL  
>Herpetotheres\_cach\_NXK08078.1  
KVDYDVC SNYGNWLYSAGIGNDPDRSRKFNMIKQGLDYDSNGDYVRLWVPPELQGIKADIHTPWALNSAALSQ  
VGVTLGKTYPPQPVVTAPEWSRYINQRAQGRSPHPRGRGPAHTPRQHKDRGIDFYFSRKKDA  
>Herpetotheres\_cach\_NXK08244.1  
MQHSSIHWRKGLRLHDNPALLAAATDCCRLHPLFILNPSSSQAGTNAQRFLLDALRDLGDLQEVGSRLFVV  
QGCPEEVFPRLFHAWGTTRLTFEVDTEPSARQDATVAKLAAQHGEVIEVSHSTLYDTQRVLALNNSKAPLT  
YKHLQSLLATLGPPEKPAPTLTQEHLQGEHGVLDGWVEHEAASASPRSPLSGVMVAVTPPLTHHPNFGAASSPS  
QNMTVPVCPPIQAWVCSFKKPRTEPTSLSPSTTVLSPYLKFGCLSVRTFWWRDLQVYQGGQREHSQPPISLHGQL  
LWREFFYTAGTSIPNFDVMGNPVCLQVNWNNPQHLHAWKEGQTGYPFIDAIMTQLRTEGWIHHLARHAVAC  
FLTRGDLWVSWEGLKVFEELLLDADWSLWLNAGNWLWLSGSAFFHRYFHVYSPITFGKKTDRDGAYIRKYIPIL  
KDFPAEYIYEPWKAPRAVQEAGCLVGTHYPWPIVEHGAASKRNLGRMKLAR  
>Herpetotheres\_cach\_NXK08557.1  
MGVNAVHWFRKGLRLHDNPALRECIRGADTVRCVYILDPWFAGSSNVGINRWRFLQCLELDANLRKLNSRL  
FVIRGQPADVFPRLFKEWNIAKLSIEYDSEPFGKERDAAIKKLASEAGVEVIVRISHTLYDLDKIIELNQGQP  
PLTYKRFQTLISRMEPLEMPVETITPEVMEKCTTPVSDDHDEKYGVPSLEELGFDTDGLPSAVWPGGETEALT  
RLERHLERKAWVANFERPRMNANSLASPTGLSPYLRFGCLSCRLFYFKLTDLYKKVKNSSPPLSLYGQLLW  
REFFYTAATNNPRFDKMEGNPICVQIPWDKNPEALAKWAEGRGTGFPWIDAIMTQLRQEGWIHHLARHAVACFL  
TRGDLWISWEEGMKVFEELLLDADWSVNAGSWMWLSCSSFFQQFFHCYCPVGFGRRTPNGDYIRRYLPVLRG  
FPAKYIYDPWNAPESIQAAKACIIGVNYPKPMVNHAEASRLNIERMKQIYQQLSRYRGLGLLATVPSNPNGN  
NGGLMGYSRGESISGCGGTGGQSKSFRAQLGTGDHTVVQPCALGDTHTGASGIQQQGYCQASSILHYAHGDN  
QQSHLLQAGRTALGTGISTGKRPNPEETQSVGPKVQRQSTN  
>Herpetotheres\_cach\_NXK11489.1  
DNWALLYAQRALKQELPLHVCFLVPKFLDATIRHYGFMLRGLQEVAEECAELNIPFHLLLGAKDVLVPFV  
VEHGVGGLVTDFCPLRLSRQWVQDVRERLPEDVPFAQVDAHNIVPCWVASSKQEYSARTIRGKIHAQLPEFLT  
EFFPVIRHPYPPSCPAEPIAWEACYSSLQVDRVTKEVEWATPGTTAGLAVLQSFITERLKSFSSSHNDPNKAA  
LSNLSPWFHFGQVSTQRAILEVQKHRDKYKESVDAFVEEAVVRRELAENFCYYNENYDSVQGAYDWAQTTLKL

HAKDKRPFLYKLQELEQGTTTHDPLWNAQLQMVQEGKMHGFLRMYWAKKILEWTRSPEEALRFAIYLNDRYEL  
DGRDPNGYVGKLQDGYMGWGGCLWSICGIHDQGAERAI FGKIRYMNYAGCKRKFDVSQFERRYAPPT

>Herpetotheres\_cach\_\_NXK11544.1

MLHRTIHLFRKGLRLHDNPALLAALESSEAVYPVYILDRKFMTSVMHIGALRWHFLLQSLEDLQKNLCELGSC  
LLVIQGEYESVLRDHVQKWNITQVSLDAEMEPFYKEMEANIRRLGEELGFEVLSLVGHSYDTRKILDLNGGT  
PPLTYKRFLHILSLLDGPEVPVRNLTAEDFQRCRAPDLGLAECYRVPLPVDLKI PPESLSPWKGETKGLQRL  
EQHLTDQGWVASFTKPRTIPNSLLPSTTGLSPYFSMGCLSVRTFFYRLSNIYAQAKHHSLLPPVSLQGQLLWRE  
FFYTVASATPNFTKMAGNPICLQISWYEDAERLHKWKTATGTGFPWIDAIMTQLHQEGWIHHLARHAVACFLTR  
GDLWISWEEGMKVFEELLLDADYSINAGNWMWLSASAFFHQYTRIFCPIRFGKRTDPEGQYIRKYLPLVKNFP  
SKYIYEPWMASEEEQKQAGCIIGRDYPFPMVNHKEASDHNQLMLKQVREEQYRTAQLTRDDTDDPMEIKVKCD  
HSEENVSKRKVARMTTE

>Heterocephalus\_glab\_\_XP\_004844852.1

MAVNAVHWFRKGLRLHDNPALKECIRGADTIRCXYILDPWFAGSSNVGINRWRFLLQCLEDLDANLRKLNSRL  
FVIRGQPADVFPRLFKAWNITKLSIEYDSEPFQKERDAAIKKLATEAGVEVIVRISHTLYDLDKI IELNGGQP  
PLTYKRFQTLISKMEPLEIPVETITSEVIEKCVTPLSDDHDEKYGVPSLEELGFDTDGLPSAVWPGGETEALT  
RLERHLERKAWVANFERPRMNANSLLASPTGLSPYLRFGCLSCRLFYFKLTDLYKKVKNSSPPLSLYGQLLW  
REFFYTAATNNPRFDKMEGNPICVQIPWDKNPEALAKWAEGRGTGFPWIDAIMTQLRQEGWIHHLARHAVACFL  
TRGDLWVSWEEMKVFEELLLDADWSINAGSWMWLSCSSFFQQFFHCYCPVGFGRRTPNGDYIRRYLPVLRG  
FPAKYIYDPWNAPEGIQKVAKCLIGVNYPKPMVNHAEEASRLNIERMKQIYQQLSRYRGLGLLASVPSNPNGNG  
GLMGYAPGESIPGSSSGSGSCAHGSGILPCAHTDQQAHLKPGRNCVGPVLSSGKRPSQEEDAQSIGPKLQQRQ  
STD

>Heterocephalus\_glab\_\_XP\_004852021.1

MAAAVGTGTGAAPTATGAEGACSVHWFRKGLRLHDNPALLAAVRGARCVRVYILDPWFAASSSVGINRWRF  
LLQSLEDLDTSLRKLNSRLFVVRGQPADVFPRLFKEWGVTRLTFFEYDSEPFQKERDAAIMKMAKEAGVEVVTE  
NSHTLYDLDRIIELNGQKPPPLTYKRFQAIISRMELPKKPVGAVSSQQMKSCRAEIQENHDDTYGVPSLEELGF  
PTEGLGPAVWQGGETEALARLDKHLERKAWVANYERPRMNANSLLASPTGLSPYLRFGCLSCRLFYRLWDLY  
KKVKRNSTPPLSLFGQLLWREFFYTAATNNPRFDRMEGNPICIQIPWDRNPEALAKWAEKGTGFPWIDAIMTQ  
LRQEGWIHHLARHAVACFLTRGDLWVSWESGVRVFDELLLDADFSVNAGSWMWLSCSAFFQQFFHCYCPVGFG  
RRTDPSGDYIRRYLPKLKGFPSRYIYEPWNAPEVQKAAKCIIGVDYPRPIVNHAETSRLNIERMKQIYQQLS  
RYRGLCLLASVPSCVEDLSHPVAEPTLSQAGSSSSTGPRSLPDGPASPKRKLEAAEEPPGEELSKRARVAELP  
APEPTSKDA

>Himantopus\_hima\_\_NXN64272.1

KVDYDVC SNYGNWLYSAGIGNDPRDNRFNMIKQGLDYDGS GDYVRLWVPELQGIKADVHTPWALSSAALFQ  
AGVTLGETYPQPVVTAPEWSRHINQRPQGRSPHPRGRSGPAHTPMQHRDRGIDFYFSRKDVD

>Himantopus\_hima\_\_NXN65466.1

RFLQSLLEDLDNSLRKLNSRLFVVRGQPTDVFPRLFKEWGVTRLTFFEYDSEPFQKERDAAI IKLAKEAGVEVV  
IENSHTLYDLDRIIELNGHKPPPLTYKRFQAIISRMELPKKPVSTVMSQQMETCKVDIQENHDDVYGVPSLEEL  
GFPTDGLAPAVWQGGETEALARLDKHLERKAWVANYERPRMNANSLLASPTGLSPYLRFGCLSCRLFYRLWE  
LYKKVKRNSTPPLSLYGQLLWREFFYTAATNNPKFDRMEGNPICIQIPWDRNPEALAKWAEKGTGFPWIDAIM  
TQLRQEGWIHHLARHAVACFLTRGDLWISWESGVRVFDELLLDADFSVNAGSWMWLSCSAFFQQFFHCYCPVG  
FGRRTDPSGDYVRYLPKLKGFPSRYIYEPWNAPEVQKAAKCIIGVDYKPKPMVNHAETSRLNIERMKQIYQQ  
LSRYRGLCLLASVPSCVEDLSGPVADSASGQGCSTSTAMRLSQADQASPKRKHEGAEEELCTEELYKRAKVTGL  
PAPEIPGKSL

>Himantopus\_hima\_\_NXN66078.1

MPHRTIHLFRKGLRLHDNPNTLLAALESSEAIYPVYVLDKRFMTSVMHLGLVLRWHFLLQSLEDLQKNLCQLGSC  
LLVIQGEYESVLRDHVQKWNITQVTLD AEMEPFYKEMEANIRRLGEELGFEVLSLVGHSYDTRKILDLNGGT  
PPLTYKRFLHILSLLDGPEVPVRNLTAEDFQRCRPPDPGLAECYRVPLPVDLEI PLESLSPWGGETEGLRRL  
EQHLTDQGWVASFTKPRTIPNSLLPSTTGLSPYFSMGCLSVRTFFYRLSNIYAQAKHHSLLPPVSLQGQLLWRE  
FFYTVASATPNFTKMAGNPICLQISWYEDAERLHKWKTATGTGFPWIDAIMTQLRQEGWIHHLARHAVACFLTR  
GDLWISWEEGMKVFEELLLDADYSINAGNWMWLSASAFFHQYTRIFCPVRFGKRTDPEGQYIRKYLPIKKNFP  
SKYIYEPWTASEEEQKQAGCIIGRDYPFPMVNHKEASDRNLQMLKQVREEQYGT AQLTRDDTDDPMQMKVKRH  
HSEENVSKGKVARMTTE

>Himantopus\_hima\_\_NXN67465.1

RFLQCLEDL DANLRKLNSRLFVIRGQPADVFPRLFKEWNI AKLSIEYDSEPFQKERDAAIKKLASEAGVEVI  
VRISHTLYDLDKI IELNGGQPPLTYKRFQTLISRMEPLEMPVETITPEVMEKCTTPVSDDHDEKYGVPSLEEL  
GFDTDGLPSAVWPGGETEALTRLERHLERKAWVANFERPRMNANSLLASPTGLSPYLRFGCLSCRLFYFKLTD  
LYKKVKNSSPPLSLYGQLLWREFFYTAATNNPRFDKMEGNPICVQIPWDKNPEALAKWAEGRGTGFPWIDAIM  
TQLRQEGWIHHLARHAVACFLTRGDLWISWEEGMKVFEELLLDADWSVNAGSWMWLSCSSFFQQFFHCYCPVG  
FGRRTDNGDYIRRYLPVLRGFP AKYIYDPWNAPEVQKAAKCIIGVNYPKPMVNHAEEASRLNIERMKQIYQQ

LSRYRGLGLLATVPSNPNGNGGGLMGYSPGESISGCGSTGGHLFPASLGAQLGTGDGHTVVQPCALGETHTG  
ASGIQQQGYCQASSILHYAHGDNQQSHLLQAGRTALGTGISAGKRPNPEEETQSVGPKVQRQSTN  
>Himantopus\_hima\_\_NXN68464.1  
DNWAFLYAQRALALKQEMPLHICFCLVPKFLDATIRHYSFMLRGLQEVAEECAELNIPFHLLLGyakDVLPAFV  
VEHGVGGLVTDfCPLRLPRQWVEDVRERLPEDVPFAQVDAHNIVPCWVASPKQEYSARTIRGKIHAQLPEFLT  
EFPPVIRHPYPPSPCAEPIAWEACYSSLQVDRTVKEVEWATPGTAAGLAVLQSFIAERLKSFAshRNDPNKAA  
LSNLSPWFHFGQVSTQRAILEVQKHRGKYKESVDAFVEEAVVRRELAENFCYYNENYDSVQGAYDWAQTTLKL  
HAKDKRPFLYELQELEQGTTHDPLWNAQLQMVQEGKMHGFLRMYWAKKILEWTRSPeeALRFaiYLNDRYEL  
DGRDPNGYVGKLQDGGMGRGGCLWSICGIHDQGWAERAIFGKIRYMNYAGCKRKFDVGQFERRYGPRT  
>Himantopus\_hima\_\_NXN69851.1  
MQHSSIHWFRKGLRLHDNPALLAAATDCCRLHPLFILDpSSNRAGANARRFLLDALRDLDGSLREMGsRLfVV  
RGCPEEVFPRLFCawGTTrLTfEVDTEPPARQDATVAELAARHGVEVIQKVSHtLYDTERVLALNDGKAPLT  
YKRLQsLLASLGpPEKpAPALTQeHLQGCRTPCQVSHDtdYtVPTLEELGQDpTELgPHLYPGGETAALARLD  
AHMERTAWVCgFKKpETePTSLSPSTTVLSPYLKFGCLSVRTfWWRLDQVYQRQREHSQPPVSLHGQLLWREF  
FYTAGASIPNFDRMVGNPVCLQVDWDDNPQHRAWREGRTGYPFIDAImTQLHSEGWIHHLARHAVACFLTRG  
DLWVSWEeGLKVFEELLLDADWSLNAGNWLWLSGSaFFHRYfHVYSPVAFgKKTDWDGAYIRKYLPVLKDFPT  
EYIYEPWKAPRAVQERAGCLVGTHYPRPIVEHRVVSERNLGRMKAAARaQK  
>Hippocampus\_come\_\_XP\_019722428.1  
MSASRTIICLLRNDLRIHDNEVFHFAQKHADHIVPLYCFDPRHYAGTYKYNLPKTGPfRLRfLLEsLRDLRNT  
LVKRGsNLVVRQgKPEEVVADLIQQLGSVSvVAFHqEVTSEELSVEKGVKDVCARMKVQVHTCWGSTLYHRDD  
LPFQHISRLPDVYTQFRKEVESKSQVRPELPTSDRLKPLPGGLQEGDIPTPADLKQTEPLNDPRSAFPCGGGE  
SQALRRlQHfYFWDtdAVAAYKETRNGLVGLDYSTKfSPWLAVGCISPRYIFHQIRRYERERTANQSTYwVIFE  
LLWRDYFKFVALKYGNRLfQVKGLQDKTIpWKTDVTLfNAWKEGRTGVpFVDANMRELAMTGFMSNRGRQNVa  
SFLTKDLGLDWRMGAEYfEYLLIDHDVCSNYGNWLYSAGIGNDPRENRKfNMVKQALDYDSNGDYVRLWLPEL  
QKIRGADVHTPWTLsKAALSHADVVLGDAYPIpVvVAPeWSRHIGKKQNDTGPyPRGRKGPSHNPKQHRDRGV  
DFYfSRsKNL  
>Hippocampus\_come\_\_XP\_019722745.1  
MAPNSIHWFRKGLRLHDNPALKEAVQAGTVRCVYFLDPWFAGSSNVGVNRWRfLLQCLEDLDANLRKLNSRL  
FVIRGQpANVFpRLfKEWKISRLTfEYDSEpFGKDRDAAIKKLAMEAGVEVIVKISHTLYDLdKIIElNSGQP  
PLTYKRfQTLISRLDPPEMPVETLSDSLmVNCITPILEDHGDKYGVPSLEELGfDIEGLPTAVWPGETEALT  
RIERHLERKAWVANFERPRMNANsLLASPTGLSPYLRfGCLsCRLfYfKLTDLYRKVKKNSSPPLsLYGQLLW  
REffYTAATNNPRfDKMEGNPICVRIpWDKNPEALAKWAEAKTGfPWIDAImTQLRQEGWIHHLARHAVACFL  
TRGDlWISWEeGMKVFEELLLDADWSVNAGSWMWLSCSSfFQqFFHCYCPVGfGRRTDPNGDFIRRYVPVLRA  
FPAKFiyDPWNAPEsVQVAaKCIIGVHYPKPMVHHAEASRLNIERMKQIYQQLsRYRGLGLLASVPSTNGNGN  
GGMMAYSPGEQqPGTNSsNNNTPHSYHAVPENNAAVTNSRPYHEFAVPQHPGLAHIRGGITGKREREMEREC  
SGEEDPSSCSGHKMQRHSAETT  
>Hippocampus\_come\_\_XP\_019733281.1  
MRHCvTRTSfFSfPTKSLAAIMSDKKRKATKAAAEpSTKQQKLASTKEVKKEKAAGWLQDLVKQHRSDNKDMK  
VNKKRVRFISDMQEAKEESeGVLYWMLRDQRVQDNWALIHAQRLAMKKKLPLHICACLFVPKSELSTLRHYSF  
MLKGLEEVEKECRSLDIQfHLLHGSAGKVLPGfVSErGFgAVVTDfSPLREPLKWLDdVKKALPNDVPLIQVD  
AHNIVPCWVASPKLEYAARTIRSKITKLLPEFLTDFpVVEKHpyTSTKNAKpVDWAKTIASLQVDRTVGEPeW  
AQPGTTSGMVmLESfIDVRLKLfGTQRNDPNVAALSQLSPWIRfGHLsAQrVALQVQRGGKNASQSVASfIEE  
LVVRRELTDNfCFYNDKYDSVEGAYEWAQKSLRDHAKDKRPYVYTREQLERAKTHDKLWNAaQYQMVSEGKMh  
GFLRMYWAKKILEWTCsPEEALSIALYLNDRYELDGQDPNGfVGCmWSICGIHDQGWAERDVFGKIRYMNYK  
CLRKFDVPKfEKKYCPKGL  
>Hippocampus\_come\_\_XP\_019733726.1  
MvVNSVHWFRKCLRLHDNPALQeALNGANTVRCVYILDpWFAGAAANVGINRWRFLLeALEDLDCSLKKLNSRL  
FVVrGQpAEVFpRLfKEWKMTTrLTfEYDPEPYGKERDSAIKMAQEFgVETIVRNShTLYNLDRIIEMNNSP  
PLTFKRfQTIVSRLELPRRPLPSINQKQMDKCHTKITDNHDQIYSIPsLEELGfRTEGLPPAVWRGGESEALD  
RLSKHLdKKVWVANLEHPRGNMCSLYASPTGLSPYLRfGCLsCRVLYYNLRELYMKLRKCSPLSLfGQLLW  
REffYTAATNNPNfDRMDGNPICVQIPWDQNPeALAKWAEAGRTGYPWIDAImTQLREEGWIHHLARHAVACFL  
TRGDlWISWESGMKVFEELLLDADWSVNAGSWMWLSCSAFFQqFFHCYCPVGfGRRTNPTGDYIRRYIPILKD  
YPNRYIYEPWNAPEsVQKAANCvVGVDYPKPMINHAESSRLNIERMKQVYQQLSHYRGLSLLASVPTIQEEAE  
PLMTDESQTSSGPDSPSVVDKATGCVAAPDSSTVCTSSHTVLNPELESDEMRCLSQTpVNCSDSQMHPSATI  
TSTCADHSAGVESPSsLVPPPAQSPLARSQTCTPSLVCSTLPPSPSPATAQTQTSSfGPRRKSfTRKVRRGQR  
QRGRHSCHAVAREGERRGEEETEPEGEENEKMEESVEMEEERMEETyAGH  
>Hippocampus\_come\_\_XP\_019743950.1  
MPQTEGEDGELAVVRLLREVLLGREdPEGFFAMCLsILGHQETRARFLPAVQPLSSANRFLHSTLVSIYEEY  
FTKAEDDELELAVTLsLLETQVHPRTrLQKYDGVSNQSGHSKEGGGTTPePAHQQETFLNMSGTCQTVSAKQD  
MGSKSDMMEDQCEKTNHsKSRQRRAAAQHVVGLPDSPSGAAPVLLWVRDLRLCDNPALVGSLELGAPVIP

VFIWSPKEEEGPGMTVAMGGACKYWLHQALSSFRSSLERIGSHLVFLEVNGSSTLRTLKELVRETGARTVLAN  
ALYEPWLKERDDEVVSRLQKDGVRCKMFHSYCTRPYSVSTEGVGLRGIGSVSHFMSCCRQNPAGTAFGAPLD  
PPMSLPVPSSWPQGIPLDTLGLARMPRRKDGTIDWAENICKSWDFSEEGAHARLEAFLHDGVYRYDKESGRA  
DAPNTSTLSPYLHFGQLSPRWLLWDAKGARCRPAKFQQRKLAWRDLAYWQLTLFPDLPWESLRPPYKELRWSSN  
RNHLKAWQQRGTGYPLVDAAMRQLWLTGWMNNYTRHVVASFLIAYLHLPWQEGYRWFQDTLVDADVAIDAMMW  
QNGGMCGLDHWNFVMPVDAAMTCDPNGSYVRKWCPEIAELPDELIHKPWKCPTSMRLRAGVVLGQTYPERIV  
TNLEERRSRSLQDVALVRRQHAEYVDTRSGCDLVPLPPRLVSEALGLAQPTGGKQFLLPVITRMEFKHQMDDP  
DMDAATNPYNAVLKGYVSRKRDETVAFLLNERDFTASVLHEGAQRERLES DHRRMEGLPPKRLPTQGRARRST  
NTNDRFSILPSGTVLTTTHR

>Hippoglossus\_sten\_\_KAF5157511.1

MSRTVVCLLRNDLRLHDNELFHWAQRNAENIVPLYCFDPRHYVGTHNYNLPKGTGPFRLRFLQLSIKDLRNTLL  
NKGSNLVVRRGKPEDVVAELIKQLGCVSTVAFHEEVTSEELNVEKKVKDCAQMKVTVHTCWGSTLHHRDDL  
FHQMSRLPDVYTEFRKAVEARSVRPVFPAPEQLKPLPPGLDEGAIPTAQDLQQTEPLTDPRSAFPCSGGESQ  
ALARLKHIFYWDDTAVATYKETRNGLIGVDYSTKFSPLAIGCISPRYIYHQIKQYERERTANQSTYWVIFELL  
WRDYFKFVGKYGNRLFQVKGLQDKSVPWKKDMKLFNAWKEGHTGVPFVDANMRELAMTGFMNSNRGRQNVASF  
LTKDLGLDWRMGAEWFEYLLIDHDVCSNYGNWLYSAGIGNDPRENRKFNMIKQGLDYDNNGDYVRQWVPELQG  
IRGSDVHAPWTLSPAALSHAHVTLDDTYPTPIVMAPEWSRHVNKKSGATGPSPEERKARLTTPNSIRTEA

>Hippoglossus\_sten\_\_KAF5168753.1

GDSPENLRLHTDLLTCTQPRNASVSGPDIIDSSSGRPLQNKMAPNSIHWFRKGLRLHDNPALQEAVRGADTVRC  
VYFLDPWFAGSSNVGVNRWRFLQLCLELDANLRKLNLSRLFVIRGQPANVFPRLFKEWKISRLTFEYDSEFPF  
KERDAAIKKLAMEAGVEVNVKISHTLYDLDKIIELNNGQPPLYTKRFQTLISRLDPPEPTAETLSEMLMGCCV  
TPISDNHGDKYGVPSLEELGFDVEGLPPAVWPGGEAEALTRIERHLERKAWVANFERPRMNANSLASPTGLS  
PYLRFGLCLSCRLFYFKLTDLYRKVKKNSSPPLSLYGQLLWREFFYTTATNNPRFDKMEGNPICVRIPWDKNPE  
ALAKWAEAKTGFPWIDAIMTQLRQEGWIHHLARHAVACFLTTRGDLWISWEEGMKVFEELLLDADCSVNAGSWM  
WLSCSSFFQQFFHCYCPVGFGRRTDPNGDFIRRYLPVLRGFPKFIYDPWNAPESVQAAAKCIIGIHYPKPMV  
HHAEASRLNIERMKQIYQQLSRYRGLGLLASVPSANGNGGMAFSPGEQQQPGTNSNNSHCKSIFYK

>Hippoglossus\_sten\_\_XP\_035011753.1

MAVNSVHWFRKGLRLHDNPALQEXLSRADTVRCVTSGPGVVRKRQRRINRWRFLLESLEDLDSSLKKLNSRLF  
VIRGQPTDVFPRLFKEWKVTRLTFEYDPEPYGKERDGAIIKMAQEFQVETIVRKSHTLYNLDRIIEMNNNSPP  
LTFKRFQTIIVSRLELPRRPLPAVTQQQMDKCRKTITENHDQLYSISLEELGFRTVGLPSAVWRGGESEALDR  
LNKHLDDKKVWVANLDHPRVNTCSLYASPTGLSPYLRFGLSCRVLYYNLRELYMKLRKRCSPPLSLFGQLLWR  
EFFYTAATNNPNFDRMDGNPICVQIPWDQNPALAKWAEGRTGFPWIDAIMTQLRQEGWIHHLARHAVACFLT  
RGDLWISWESGMKVFEELLLDADWSVNAGSWMWLSCSAFFQQFFHCYCPVGFGRKRTDPGDIYIRYIPIKDY  
PSRYIYEPWNAPESIQAANCVGVDPKPMINHAEGSRLNIERMKQVYQQLSHYRGLSLLASVPTIQEEAEF  
PMTDESQTSSGPDSPRPVAPSEAAGCSTAPDSSTVYVSYAPRPELEGTQGPHPSPQTPCTSSGSHPPPPAAVS  
WSFAPPSPAHSPLSRKASSPSSSCTSPSPASPAGAPGQTFPKRKGLARQTRNPRQRGRPSCATSGREGER  
REEEEEEREDTGGDERMEEDAEHEVERMEEETSAHQ

>Hippoglossus\_sten\_\_XP\_035012548.1

MPPSAAGAQDSKALVRQLLREVLVGREDPEGFFAMCVSVLGQQETRTQFQSLIQPLSTANRSLHCSLTSIYLE  
YFSKTGDDDDLEFALALSVLEMKDPQLSTCSEESTLQPLGAKANQSSSVQLTSASQPQSSSRTQRADVGGGRK  
KTQSVQKGPGRVCMCLPQTQETELQKSTHVDKCNKETPGTSQSVCVSKPYASFFKQEAVLKGDQEAVLKGDQM  
TEGGDSSNQSEKPKRSRNRKRREGGGQQVGMPTSPSASPVLWFRDLRLCDNPALIGSLENGAPVIVPF  
IWTPEEEEGPGITVAMGGACKYWLHQALSCFSSSLERIGSHLVYLKANGVGNVGVSSSLRTLTELKETGARAV  
LANALYEPWLKERDDAVVSALQKVGVCRMFHSYCLRDPYSVSTEGVGLRGIGSVSHFMSCCKQNPESALGVP  
LDPPAFLPTPANWPQGVSLDALELALMPRRKDGTIDWAVNIRKSWDFSEEGAHARLEAFLQDGVYRYEKESG  
RADAPNTSSLSPYLHFGQLSPRWLLWDAKGARCRPPKFQQRKLAWRDLAYWQLTLFPDLPWESLRPPYKALRWS  
TDRGHLKAWQQRGTGYPLVDAAMRQLWLTGWMNNYMRHVVASFLIAYLHLSWQEGYRWFQDTLLDADVAIDAM  
MWQNGGMCGLDHWNFVMPVDAAMTCDPYGSYVRRWCPELADLPDELIHKPWKCPASILRRAGVIFGQTFPDR  
IVTDLEERRSLSLQDVAVVRREFVQYVDKRSGLVPLPPRLVSEALGLSHRNGGQVTEVKQFLLPVITRMEF  
KHHQEDPDADAASNPNYNAVLKGYVSRKRDETI AFLNERDFTASVLYEGAQRKERLESNYRRMEGLPQPPAPQG  
RARRPTAKDRFSLVPGGAVTSR

>Hippoglossus\_sten\_\_XP\_035020365.1

MAHTCIHWFRKGLRMHDNPALLAALRDCKQLYPVFLLDPHLHNNMCINRWRFLVGALKDLDCLSLRKLNSRLFV  
VRGRPEDVLPKLFDKWKVTKLTYEYDTEPYSLGRDTAVTALAKEHGVQVIYKISHTLYDIERIIEENNGKAPL  
TYTRMAIIVKTLGPPKKVPAPTME DMAEVKTPCSESHEQQYGI PALEELCPDAAALGEEFPFGGEQEALRRL  
DEHMKRTRWVCEFEKQPQTSNLSPTTTLSPYVTVGCLSARTFWWRADVYQKKHSDPPVSLHGQLLWREF  
FYTASVGI PNFNKMGVNPVCTQIDWDTNSEYLA AWREARTGFPFIDAIMTQLRQEGWIHHLARHAVACFLTTRG  
DLWISWEDGQKVFEDLLLDGDWALNAGNWQWLSASTFFHQYFRVYSPVAFGKKTDKNGDYIKKYLP LLKKFPA  
QYIYEPWKA PRSVQQAAGCIVGKDYPHPIVQHEVISKKNIQRMKSAYAKRSSDKTDSPTKKQGVKRKGPSVVD  
MMKKKEKRKKSPPS

>Hippoglossus\_sten\_\_XP\_035025301.1

MFCIWRSSPSAQRRPLTLTYQRSRPLLSLFTGSFSSVSTMSDKRKAAPASKERSAKQKKLAPTQQQEKQQ  
EKQQRTGGWLQDLIMQQRSEEKEIKFNKKRLRILSDAEKMKQSGSEGLYWMSSRDQRVQDNWALIHAQKLAVKK  
NLPLHVCFCWFVPKSELSTLRRYSFMLKGLKEVAEECKALDIQFHLLHGSAGDVLPGFVSDHSLGAVVTDYFP  
LREPLQWLEDVKEKLPEDILLKQVDAHNIVPCWVASPKQEYAARTIRGKITKLLPDFLTDFFPVEKHPVPATR  
TAKPIEWEKTLASLPVDREVEVPEWAKPGTKAGMAMLESFIDVRLKLFENKRNDPNVSALSQSPWIRFGHIS  
AQRVALQVQSSGQKAGQTVASFIEELVVRRELTDNICYYNKKYDSVEGAYEWAQKTLKDHAKDKRPYLYTREQ  
LEKAKTHDKLWNGAQYQLITEGKMHGFLRMYWAKKILEWTSSPEEALSIALYLNDRYSLDGDQDPNGFVGCWWS  
ICGIHDQGWAERPIFGKIRYMNKYGCTRKFDVPQFERKYCPKNL

>Homarus\_ame\_AWC08575.1\_cry\_2

MTGEASKVKAKHLVHWFRKGLRLHDNPALRAGLKNAHTFRCIFILDPWFAGSSNVGINKWRFLQSLLEDLDSS  
LRKLNSRLFVIRGQPAHVLPFLFREWGTTCLTFEKDPEPFGKARDANIVAIAREMGINVIVKTSHTLYKPEKI  
IDKNGGKPPLTYKSFQNILMSMDLPLLPQSTITLEDLEDKSTPLSDDHDEKYGVPTLEELGFETETLHQTGWK  
GGESEALTRLEHHLERKAWVASFGRPKMTPQSLYPSRTGLSPYLRFGLSCRRFFAELNDLYRKIRKSPPPLS  
LHGQLLWREFYYTAATNNPKFDHMEGNPICVQIPWDKNPEALAKWANGQTGYPPWVDAIMTQLRKEGWIHNVAR  
HAVACFLTRGDLWVSWEEGMKVFDELLLDADWSVNAGSWMWLSCSSFFQQFFHCYCPVRYGRKADPNGDYIRM  
YLPVLKNFPTKYIHEPWTAPEVSQRAAKCVIGRDYPMMPVDHIKQSQNNIERMKQVYQQLAHYRGKINPAIKS  
PTVDHYPSPPEFEKKRSSKTNKNDLQYDSNYRVQVQA

>Homarus\_ame\_KAG7173815.1\_cry\_DASH-1

MKANTNVDEVVPVYCFDPRHFQETYHFCFSKTGNHRAKFLQSVTREETDVERALRERCKAAGAQIHSFWGST  
LYHKNDLPFAVNNIPDTFTGFRKAVEAQSRVLGPIVMPEKLPPLSGIDLGLPTLERLGVKDAPTDRRTAFP  
FSGGETSGLERVKRYFWDSSNNVAKYKETRNGLLGEEYSTKLSPWLAHGCLSPRYIFAEIKKYESARIANQNGQ  
TGVPFVDANMRELKETGWMSNRGRQNVASFLIKDLGLDWRLGIGNDPRENKRKFNMVQGLDYDPKGEFIRTWV  
PELAEIRGAMVHTPWKMSLHDLGKAGVSLGEYYPNPVVTSTTKHKNWNTNQGREGPKQRGMDFYFKSNNKS

>Homarus\_ame\_KAG7176338.1\_cry2-like

MLKKMTTIHWRKGLRLHDNPALLASVEENCELRPLFILDWPWFVTNARVGSNRWRFLAQTLADLDIKLRDLGS  
RLFARGTPEELFPKLFKDWNVQKLTWEVDTEPYSCIRDEKIEKLAHDNVKVVCRVGHTLYSTEKIIQANLG  
KTPLTYQSMQSLVSRMGHPKPVDSLSLPGSCRINNAMAVNAKYNLPTLAELGVDEGSLQPCLYPGGETEAL  
RRLDKYMRRKTWVCKFEKPKTSPNSLQPSSTTVLSPYLKFGCLSPRTMYFRLLEVYKNNSTQPPVSLGLQLLW  
REFFYTVGAKTPNFRNMEGNPICRQIPWVRNEKLMKAWFVFEELLLDADWSLNAGNWMWLSASAFFHQYFRV  
YSPIAFGKHTDKHGEYIRKYLPLQLSKYPDNYIYEPWKAPLSTQKAAGCIIIGQDYPKPIVKARHHLQTETLQTR  
R

>Homarus\_ame\_KAG7176479.1\_cry1-like

MIKASVHWRHGLRLHDNPALLESIKDTEKFYAVFIHDGHTAGTNITGYNRLNFLTETLNSLDEQLREVGSQ  
FVFKGNPTEIFRILHKEAGITRITCEQDCEAIWNKRQDGDVRNLCQELGMDFVERISHTLWDPFKIIENNGGQ  
PLTYEMFLQVAQTLGLPPRCPDPDWSNVLFGEISDELAACKLCLPHVPKPEELGCTKKNCECPVYVGGHEPA  
LLHLADRLRVEEEAFQDGYILPNQVNPDLGPPMSMSAALRFGCLSVRKFYWDIQDVYVKMYEGESPPSHSLT  
AQLIWREYFYCMSANNPKFDQMKENPICIDIPIWYDSKEKLSAWEEGRTGYPFIDACMRQLHKEGWIHHVCR  
TAVACFLTRGDLWISWEAGLKVFYKYLIDADWSVSAGNWMWVSSSAFERQLDCSTCICPVNYGRRVEPTGDYIR  
YVPELASMPQEYIFEPWKAPRKLQKKVKCIIIGRDYPERIVIHEEMMKEISLKLKREMPHCCPSNPDEIKKFLR  
LPTTCYHNVC

>Homarus\_ame\_XP\_042217820.1

MMSKADEVPAECDGIVYWMCRDQRVQDNWAMLFAQRLALKNKVSLHVAFCCLIPKFLDATIRQYHFMKGLGEEV  
ENECQKLGIEFHLLHGEAKDVLPKIIIEHHIGGLVTDIFSPLRLPQEMLKDVKETIPKNIPMCKVDAHNIVPCW  
LASDKQEYSAKTIRRKIQDKLPDFLTKFPPVAKHSHEKSKYAKLVDWTAAEKSLEVDRTVKPVWATPGTHAG  
LDTLNQFCLKRLRKYATQRNNPNAKSLSNLSPWLHFGQISAQRCVLEVVKRYRKQFKDAADDFIEEAVVRCELS  
DNYCFYQKNYDCVEGAYNWAITTLNDHKKDTRQYLYSREAFIEAQTHDDLWNSAQIQLVTEGKIHGFMRMYWA  
KKILEWTATPEEALETAIYLNDRYSLDGCDPNGYAGKFFT

>Homo\_sapiens\_NP\_066940.3\_cryptochro

MAATVATAAAVAPAPAGTDSASSVHWRKGLRLHDNPALLAAVRGARCVRVCYILDWPFAASSSVGINRWRF  
LLQSLLEDLDSLRLNSRLFVVRGQPADVFPRLFKEWGVTRLTTFEYDSEPFGERDAAIMKMAKEAGVEVVTE  
NSHTLYDLDRIIELNGQKPLTYKRFQAIISRMELPKKPVGLVTSQQMESCRAEIQENHDETYGVPSLEELGF  
PTEGLGPAVWQGGETEALARLDKHLERKAWVANYERPRMNANSLASPTGLSPYLRFGLSCRLFYRLWDL  
YKVKRNPSPPLSLFGLLWREFFYTAATNNPRFDRMEGNPICIQIPWDRNPEALAKWAEKGTGFPWIDAIMTQ  
LRQEGWIHHLARHAVACFLTRGDLWVSWESEGVRFDELLLDADFSVNAGSWMWLSCSAFAFFQQFFHCYCPVGF  
GRRTPSGDYIRRYLPKLKAFPSRYIYEPWNAPESIQAACCIIGVDYPRPIVNHAETSRLNIERMKQIYQQLS  
RYRGLCLLASVPSCVEDLSHPVAEPSSSQAGSMSSAGPRPLPSGPASPKRKLEAAEEPPGEELSKRARVAELP  
TPELPSKDA

>Homo\_sap\_NP\_004066.1\_cry-1

MGVNAVHWFRKGLRLHDNPALKEC IQGADTIRC VYILDPWFAGSSNVGINRWRFL LQCLEDLDANLRKLNSRL  
FVIRGQPADVFPRLFKENITKLSIEYDSEPF GKERDAAIKKLATEAGVEVIVRISHTLYDLDKI IELNGGQP  
PLTYKRFQTLISKMEPLEIPVETITSEVIEKCTTPLSDDHDEKYGVPSLEELGFDTDGLSSAVWPGGETEALT  
RLERHLERKAWVANFERPRMNANSLASPTGLSPYLRFGCLSCRLFYFKLTDLYKKVKKNSSPPLSLYGQLLW  
REFFYTAATNNPRFDKMEGNPICVQIPWDKNPEALAKWAEGR TGFPWIDAIMTQLRQEGWIHHLARHAVACFL  
TRGDLWISWEEGMKVFEELLLDADWSINAGSMMWLSCSSFFQQFFHCYCPVGFGRRTDPNGDYIRRYLPVLRG  
FPAKYIYDPWNAPEGIQKVAKCLIGVNYPKPMVNHA EASRLNIERMKQIYQQLSRYRGLGLLASVPSNPNGNG  
GFMGYS AENIPGCSSSGSCSQSGSILHYAHGDSQQTHLLKQGRSSMGTGLSGGKRPSQEEDTQSIGPKVQRQS  
TN

>Honda ea\_fer\_GBG27575.1\_cry-1

MPSAQTKILWLRKTLRIHDNPTLKACMEDASTVLPVYVLDKWHSNPQNVG DVRFEFIMESLRNLDEKFKKCGV  
DAGVIFVRGEPEKVL PKIWEAVDAKAIGFDTSEEAEKHSQKTDE DVAGLANKADVKVIDEPAHWMHPPGLYER  
HMNGGEVPTTMS SFETLFSQCGSVREPLSAPKSI PYDKGTADKALDAIRKALDVEDLTVPKSGDNKFYKGLKR  
EQRKLRFPGGEDEALKRLEKVVEKQPDWVASF EKPKTAPTGLEPQTTVLSPYLNAGCLSLRRAWHAVKKA EKD  
AKGKPTQPPTSLAGQLLWREHWLTIGYFTEEDISKMKGNPLARQIDWDWDNDAKELFAKWEAGETGYPFIDAI  
MTQLREEGWIHHLARH MVACFLTRGDCFVSWEKGFDVFDRL LIDADWSVNSCNMWWLSCSAFFYQYFRCYSPI  
SFGKKWDPDGDYIRKYVPALKDMPKKYIYEPWKAPREVQE KAKCIIGKDYPERI IEDHTATSKENMNRIKEDY  
DLSSSTVK

>Honda ea\_fer\_GBG30516.1\_cry\_DASH

MGGAYRPVIVWFRNDLRLTDNAV LHLPEIQRATHLVGIYCLDDRFENARTKRFKEQAVAELEERFHKRFGAPL  
ECYRGKPEKII PDVVRKLRKLGTGSQDGFV VASEEVASYEKR VETKLQEQLAPLGFSLKLAWTYSLFHPDDL P  
FDVRS GDLPEPFTSFRKRIEDS QDAVVRQVLDVPTLKLGA IPLDDPNAGLDCVP GAWTPSQDGGGVGKSPDQS  
ADATSHVLPFEDGPLKSGHPDHWLTFRGGES AANARLEYFVEHGLSKYKTKRNESVGWDYSTKLS PWLAAGNI  
SPRQVYHRIRAYEEEHGESVHTYWCSVFEPLWRDFMRFQGIKYGNKLFFELGPAGEMP SGAKWSYGDRETA KR  
FKSWQEGRTGIPWVDG HMREL VHTGFMSNRGRQNVASFLVHNLHVDWREGAQFFQDQLIDHDVTSNWCN WASA  
AGVGTRGARLNRFNMDKQARDYDKLAVHARLWVPEVADVRPEAVHDLALRSRGSSMESFRSKKGQQRQEQQNK  
EQEQEQQE VKESGKGAEQQISAPYPPPIVRSMGGS RFENTRRLDRAELDATAAKVRH AVENAGCQVRCAMPPE  
LRDKSSFGD VDLIVATFQDKEGGNEMILKAHEQAIDAAASALCSVARKGDAVTQMSLLSEEGFQVDLEFVPSA  
SFALAVAVHAHGDFC WLLGRALQPLGLKLTT HGLFVRRAVATLLED FLLSRDPHAVANFLGVCPSFFDGETSK  
TSDTLIEIEDRRACRAFINGGDVIQRHPYLAGPLVGQC LREL CISHGNGNWKAYLQWLQATPREDILNAIDAQ  
VNALQRRANC DVARLSSS

>Honda ea\_fer\_GBG31063.1\_photolyase

MKVEVQPERCQWLKKDEDAVAEGKNDGGPVVYWMHREKRAEDN WALLKAQSLALAKNASLAVVMLVPTKYMHW  
NLRHYSFGLKGLAETQKALHAKNIPMYVLS ENPAKDLVSTCKDLKARALVMDFFPMRPKRNWDAEVTKSVDI  
PVCLVDAHN VVPCWEASDKREYAARTIRPKINRKKDDFFDAFPELSKMPSSNTDGKLKETDFDKMLEELKSDH  
KLDTSVKPVNDRFP PGPSPGAKKILDRFLDAKRLGKYSECRNDPNERVLS DMSPYMNYGFIAPQRVLM EARAYA  
KKN GKIPSKEIDGFE EEA LVRRELT DNICHYVPEYD SLDAAYDWARETLKEHAKDKRPHIYSFEELAEARTND  
ELWNAAQVMARDEGKM HGWL RMYWAKQLLTWTTETPEEALDYGFR LNDIYNLDGGDPNSIVGVAWSIMGIHDQG  
WREREIFGKIRCMTYKSSRTKFDVDKLAKYPGPGEAKSGKRKASQDKGEDDDKDSKDKDSKNKSKKGSSSNK  
KQKSGKK

>Hya lella\_azt\_XP\_018012197.1\_photolyase

MASVEKNSKGLELM DIVHKKRLKFAGSIADFKFCKKRVQVRSKSLDV PESFHSIIYWMSREQRVQDNWAF LFA  
QRLALKNKVPLKVVFCLVPKFMDATLRHYSFMIQGLKEVEFDCKQLGIPFHLLMGQAKDVLPAFVTKN NVGGV  
VTDYSPLRTPRQWVADVLNKL PKDIPLCQVDGHNVPVWEASPKQEYAARTIRGKITSKLDAYLTEFPPLIAH  
PFQDKEHEIPTTDCAAVEESLEVDT SVGPVTWARGGTSHAF AVLASFCSQRLKKFADKRNDPNEDALS NLSPW  
IHFGQISAARCVLEVQQNKSCRSSVEAYVEECVIRRELSDNFCHYQPHYDSL LGTSDWARITLDDHRKDKRE  
KIYSLAQFDRAKTHDDLWNAAQVQLVTEGKMHGFLRMYWAKKILEWTPDPDTALAYALYLNDRYSLDGRDPNG  
FVGCLWSIGGLHDQGWREREVFGKIRYMN YAGCNKKMNIKAFVSKYRVREDMPGATNVKNDLQVTSTAFTVNK  
KKREDEDSVQSEAPKKKAKTGSRSNKKIVSFSD DDE

>Hya lella\_azt\_XP\_018013167.1\_deoxyribod

MRQLRQTGYMHNRLRMVTACFLVKDLGLDWR RGEAWFAQH LNDFDLAANN GGWQWAASTGCDAQPYFRIFNPV  
SQSEKFDPEGKFIKRYVPELARLP TAAIHAPWRAKPLEL TEAGVV LGRDYPEPLVDHDEARRLTLARFAVAKA  
PRPR

>Hya lella\_azt\_XP\_018021492.1\_cry-1-like

MALDR TKSPGQNSSFGLKMSPNKTVSPVMRSTHRTILGDNNLAQPECSGSSGSPSMSSEKNSSTIKVRS GKHIV  
HWFRRGLRLHDNPALRDSIFNCETFRCIYILDPWFAGSSNVGVNKWRFL LQCLEDV DNSLRNLNSRLFVVRGQ  
PANVLPQLFKENNTTVLSFEEDPEPFG RARDASIIIGIAREMGIEVVVRTSHTLYKLDEII EKKGKGPPLTYKT  
FQNILAMMDPPPAPVPPIVAGDLQHAFTPIQPDHDDKYGVPNLEHLG FETEQLPPTAWKGGETEALQRLKHH L  
ERKAWVASFGRPKMTPQSLFACPTGLSPYLRFGCL SARKFYTELNELYTKIKKVPAPVSLHGHL LWREFFYTA  
ATNNPKFDHMKGNPICVQIPWDKNPEALAKWAHGQTGFPWIDAIMTQLRAEGWIHNVARHAVACFLTRGDLWV

SWEEGMKVFEDELLLDADWSVNAGSWMWLSCSSFFQQFFHCYCPVRYGRKADPNGDFIRTYLPVLKNFPPTYIH  
EPWMAPEVQSSARCIIGQHYPLPMVDHATQSQTNIERMKQVYRQLAHYRATMSSRSGGDSKSRCKHQOTSAP  
NRSLCSNRVLTTV

>Hyalomma\_asia\_\_KAH6938626.1

MMDAEKLIGLGKELGLSGKALLQWVEKERERESEEEYALRREAAKEDHERKLERQAGERQLELELRLRMQELQQT  
SQVVPAEPSDRDASMQGRATSQCLSVALPPVSIIRLSQEAKPAFRPAPLCNPKLRGAQTRGRHCAVSSRRWSA  
GKTRQRGARRVQRDCPRGSSRDVAGVLQWEPAAASGHVEDAVLVSVARRIVVPSLFSRSAPSTQTTAAGLGPR  
HRNRVRLYASPHGPDQPTGPDYAYVAMAAMSHAPAPAPPHHQQSTSVGGNSNGERHVHWHFRKGLRLHDQPA  
LRIGLQGARTCRVCYIILDPWFLLQSLEDLDNRLRKLNSRLFVIRGQPADVFPKIFKEWRVTHLTFEQDPEPYG  
AIRDQKITALAHEMGVSVVCEPSHTLYPLERILERHGGKTPLTYRQFQSVVVDMEPPAQPLPAPESLPRTPID  
EDHDERFAVPTLAELGFDTDNLKAAVWPGGETEALQRLERHMERKAWVASFGSPRMTPKALLASQTGLSPYLR  
FGCLSARLFYHQLADLYRKIRNSNPPLSLQGQLLWREFFYCAATRNPNFDRMHNNPMCQIIPWDVNAEALAKW  
ANGQTGYPWIDAIMRQLREEGWIHHVARHAVACFLTRGDLWLSWEEGMKVFEDELLLDADWSVNAGSWMWLSCS  
SFFQQFFHVYCPVRFGRKADPSGDYIRKYLPLVLKHFNNYIHEPWTAPESVQVAARCVVGRDYPLPMVNHQVA  
SHVNLQRIRQVYQQLTQCCKTPGLFPLSPASPTDSNKQNNNFIDDRKLRAKNSRVLFHILCFLHYFKMA

>Hydra\_vul\_XP\_002166544.2\_cry\_DASH-1

MAGFSSRKTIYWRNDLRLHDNECLNFACRDGSHVLPYCFDPDHYKLTHHFGFLKTGIHRAKLILDAVSGL  
RNSLQKKGSNLVISKHRPKEAIEKLILECEQTAPVTSIVFQKEITKEETDVEASVFKVCDCKGIQVLSFWGST  
LYHIEDIPFQINQIPNTYTLFRKGVEKCPVRKLNPIPDKISSLPNLKNFPLGEVPLNELGFDKNEYEIDVRS  
VFPFNGSEVDVAVKRLNEYLWGN SAILTYKETRNLGLGKDYSTKFSPWLALGSLSPRMIYHKIKDFEEQKKIKE  
NDSTYWVVELIWRDYFKFICSKHGNKVFFKGGLKGGKGPWTWKQDLNLFMKWANGDTGIPFVDANMKELLAT  
GWMSNRGRQNVASFLVKDLNLDWRMGAEFESLLIDSDVCSNYGNWNYIAGIGNDPRSNRKFNVIKQAADYDE  
EGDYVRTWLPVLKKGICHTPWRLSASELNAGGVDLGKNYPHPIIVAPEWAKHALKMNSKNCFHEHRGKQNGQ  
KRSIDFYFKSGKTGE

>Hymenolepis\_dim\_VDL14025.1\_unnamed\_pr

MSSTVQNNKDGFAKWMQIDKNRVIDCGKSIAEYFASCRIRKICGLNFFKELSNDELKGVTKSAGTKGPVVY  
WMNRDQRVQDNWALLFAQRIAMKFSVPLDICFNLLSSPAIQTRRHANFLLEGLTEIEQASLLIIHSICDSLS  
FNYIEECKDLNIGFHVLFETGAAPKTGGKRKADGETAANSVVKKLTPLINFLSQVGARVIITDFSPLRDDL  
HLLDIIKDQLPEDIPFYQIDAHNVIPVWFASDKMEYAARTIRPKLHEKAKALFTNFPVPTHPCVKQTGPVNW  
SKIKEFLNSRVETVEAVDKYKGGSKAGFFQLYTLFHNRLSSYGKDRNDPTKDALSNSLPWFHFGKSDLPLVLF  
LSFGSERSLRMFGEHCIRLWFRREIPIPCLLTAFTIARTSSGCCLLFSRPPLLPSSLLPPLCNMLVGKILR  
IFIPLHIRFNPAIGSETLRKHSNDIRQPAYSEEKMEASSTGDELWNAAQRLVYEGKIHGFLRMYWAKKILEW  
HAGGPEKALQLGIHLLHTYSSFLGVMWSICGIHDQGWVERPVFGKIRFMNFAGCKRKFVDVAFIKKYPPPVN  
KHFKA

>Hymenolepis\_dim\_VDL61458.1\_unnamed\_pr

MRVLHWFRKGLRLHDNPALLASLNPPKKTSDPEIETFLYIYDTTGKEYGMRGYRQAQFLLESVLDLDQSLKK  
LGKNLRLLVVEGDPIMEVPALCKNLDVKYVTFEADIEPYSIVRDNEVTKKLEEEGVTVSRTHGHTMWDPEFLK  
SHHQPPQTATKDSNSKNLGIPTYQSFCALIRRVSPQGPSKPLPSFEEYAKSCTAPNLSELELGKVHIGPPSS  
LEQLKIEFDPIPELGDHVSDDGEKEWEMTFPGGEIEGLDRLQRMVAQRPDWVCSFAKPETAPTSLPISTTGLS  
PYIRFGCVSARHAWVIAEAMRPASKASKTKPPTQPPVSLHGQLLWREFFNLVASVTPNFDRIEGNPICRPID  
WNVDENLLSAWREARTGFPFIDAAMIQLHRHGWMHHLARHAVACFLTRGQLWQSWTAGADIFSSLLLDADWAL  
NSANWMWLSASAFFHQYYRIYCPVSFGRKTDQDEGFIHFIPALRNMPPEYIYDPWTAPMSVQKKAGCIIGVD  
YPDPIDVHQEAKAENLERMKAAYADREVSTPEQKRKITFGFGKAAMKNAKKMKK

>Hyphobacterium\_ind\_WP\_109260360.1\_DNA\_photol

MSSSPRAPVIVWFRQDLRLSDNPALAEARQTGQAVLPLFILDDETQGWRRGGASRWLHHSALAALSGALEAI  
GSHLLLRGPAGAVLKAFIEETGATAVFWNRCFEPFNCERDKSIKAELESSGLDVQSFNASLLAEPWTVRNKS  
GDPFRVFSFWRNIRSELDPGYPLKAPEHLPSAEWPAGDPLQSWNLLPRNPDWAEGFNTVWTPGEAGARKRL  
EDFLASGARQYAGGRDRPDKPYTSGLSPHLHFGEVSPRQIVSATESVRDDIGDRNAEKFLSELGWREFAYSL  
FNFPDLPEANYQAKFDRFPWRQDSAALKAWQRGQTGYPMVDAGMRELWATGWMHNRVRMITASFILIKHLMIDW  
REGEKWFWDTLVDADLANNSASWQWVAGSGADAAPYFRIFNPTVQGEKFDPDGYIRKWVPELARLPKGKYLNQ  
PWNAGPLILKEAGIELGKTPAPIIDHKAARERAAAFQSLKETA

>Ichthyophthirius\_mul\_XP\_004034973.1\_IMG5\_10828

MNRVQQYIWEQDLLKNYKNTRNGMVGADYSSKFSIWLANGCISPRYIYQEVKKYKERIKNDSTYWIIFELLW  
RDYFKFVAIKYKNKLFYKNGIQGLDINWNQEIYFELWKNKGKTGYPLVDANMRELNSTGFMSNRGRQNVASF  
NKNMWVDWRMGAEYFESILLDYDPESNYGNWQYSAGIGNDGRQFRVFNITKQSN DYDPEGIYIKLWIPELKNV  
PKNKLFEPWKLNKEEQKEYGVIIGKDYPEPILDYFETMCSFSGEFKALEKSFIDELSEHLSPIPLASNAYIY  
KYTQGHKLIDLPRGGYIIKTSVGNIQYGIPPETIKDSITLKLDPVTNFIIPSKRFDIIANLNVAEFEFPAYYN  
YFIHKKKINLICDIETKECIRNAFQETLCGPISHENLAEDFYTYTPVSGYPDFKKERKILSGAIHDSQYDSNV  
DSLFSQVFENNKIILKEDDNIVEIQKYREQNSNSFYFKFIDNGQTVANILDELDFVQGFVKIAEEFYKVDD  
VCQEQKQQTIIQQQINPQIKKITDIVQSSSLEKRGSKFNIPINIEARNTFRPPDFGVTVLGNSHGFDPCGHTTG

FVLWIYGKIMVDPPPPFSNDYLKNMNIMPQTISAVIITHCHADHDSGAFEKILLQSKIEVITTRTIMNSFVRK  
YSNITAMSEEKIKKLFVFRPVIIGSSMKINGGLNFFYSFHVIPCIGFDVEVMGKSIYFSADTFYDPIRLKKY  
FEWGYLQKERYSQLALINFDKYDLILHEAGVPPIHPTLSSFKHLSQQARENLYILHIAEKDLKNQEGFKTMKE  
GIENTIVIYQRNTNQIDHLKTLDLISNIDIFSSLTVKNVRYLLDCLQIEKYDKGELIFPENSTGNKFYVIKS  
GLVKCFSSKNQNFESFIGPGDYFGEISLIDEMKQRKASAKAEKKTLLSLERHDFQFLFSEGSNILNKLKLT  
QARKQFVIVYVEKNNFLNSLDKNQKVSLEAIKEKQVQKDECIWKQGQIPNLVVIKSGKLLFIKQDNLAKIC  
DSGEFIGESLCIIKKQPAVTSKAIKDIQSNQIIINDEDPLVCSCLEIEPTTLCF  
>Ichthyophthirius\_mul\_XP\_004037245.1\_IMG5\_05753  
MDNYWKNKELEIITLEQMGEFESGKDFPSIQFNEKIVKTYDKTRDIPSLNGTSRMGVHLRFGTVSIRDLVRRS  
KSLNQVYINELIWRDFYMMILDQFPRVEKYNFKQKYDKLEWRNNPEEFKAWCEGKTGYHIVDAGMRQLNCSGY  
MHNRLRMITASFLT KHLIDWRWGERYFAKKLLDYDLASNSGGWQWSAGTGTDSQPYFRIFNPDSQKKFDPN  
YTFIKTWVKDLNTKSYPKPIVEHTFARNRCLETFFKKV  
>Ictidomys\_trid\_XP\_005330087.1  
MAAAVVTAATVPTPATSadGASSVHWFRKGLRLHDNPALLAAVRGARCVRVYILDPWFaASSSVGINRWRF  
LLQsLEDLDTSLRKLNSRLfVVRGQPADVFPRLfKEWGVTRLTfEYDSEPFgKERDAAIMkMAKEAGVEVVTE  
NSHTLYDLDRiIELNGQKpPLTYKRFQAIISRMELPKKPVGAUSSQqMESCKAEIQEDHDDTYGVPsLEELGF  
PTEGLGPAVWQGGETEALARLDKHlerKAWVANYERPRMNANSLLASPTGLSPYLRFGCLSCRLfYYRLWDLY  
KKVKKNSTPPLSLFGQLLWREffYTAATNNPRfDRMEGNPICIQIPWDRNPEALAKWAEGKTGFpWIDAIMTQ  
LRQEGWihHLARHAVACFLTRGDLWVSWESGVRVfDELLLDADfSVNAGSMMWLSCSAFFQqFFHCYCPVGfG  
RRTDPSGDYIRRYLPKLKGfPSRYIYEPWNAPEsIQKAAKCIIGVDYPRPIVNHAEtSRlNIERMKQIYQQLS  
RYRGLCLLASVPSCVEDLSHPVAEPGSSQAGSISSTGPRPLSSGQASPKRKLEAAEEPPGEELSKRARVAELP  
TPELPSKDA  
>Ictidomys\_trid\_XP\_013212794.1  
MGVNAVHwFRKGLRLHDNPALKECIQGADTIRCVYILDPWFAGSSNVGINRWRFLLQCLEDLDANLRKLNSRL  
FVIRGQPADVFPRLfKEWNITKLSIEYDSEPFgKERDAAIKKLATEAGVEVIVRISHTLYDLdKIIElNGGQp  
PLTYKRFQTLISKMEPLEIPVETITSEVIEKCTTPLSDDHDEKYGVPSLEELGFDTdGLSSAVWPgGETEALT  
RLERHLERKAWVANFERPRMNANSLLASPTGLSPYLRFGCLSCRLfYfKLTDLYKKVKKNSSPPLSLYgQLLW  
REffYTAATNNPRfDKMEGNPICVQIPWdKNPEALAKWAEGRTGFpWIDAIMTQlRQEGWihHLARHAVACFL  
TRGDLWISWEEGMKVFEELLLDADWSINAGSMMWLSCSSFFQqFFHCYCPVGfGRRTDPNGDYIRRYLPVLRG  
FPAKYIYDPWNAPEGIQKVAKCLIGVNYPKPMVNHAEEASRLNIERMKQIYQQLSRYRGLGLLASVPSNPNGNG  
GLMGYAPGENIPGCSSSGRRSSMGTLSSGKRPSQEEDTQSIGPKVQRQSTN  
>Indicator\_macu\_NXN14763.1  
DNWAFlyAQRLALKQELPLHVCfCLVPKFLDATIRHYSfMLRGLQEVAKeCAELNIPFHLLLGyAKDVLPTfV  
VEHGvGGLVTDfCPLRLPRQWVEDVRERLPEDVPfAQVDAHNIVPCWVASPKQeYSARTIRGKIHAQLPEFLT  
EFfPIIRhPYTSSCLAQPIAWEVCYSSLQVDRTVKEVEWATPGTAAGLAVLQSFITERLKSFGSHRNDPNKAA  
LSNLSPWFHFgQVSTQRAILEVQKHrgKYKESVDVfVEEAfVVRRELAENfCYYNENYDSVQGSAYDWAQTTLK  
LHskDKRPFLYKLEELEHGtTHDPLWNAAQlQMvQEGKMHGFLRMYWAKKILEWTHSPeeALKfAIYlNDRYE  
LDGRDPNGYVGCLWSICGIHDQgWAERAVLGKIRYMNyAGCKRKfDVRQfERRYAPRA  
>Indicator\_macu\_NXN16040.1  
MQHSSIHwFRKGLRLHDNPALLAAATDCCHLHPLFIldPSSSRGGPNARRFLLDALQDLDRSLREIGSRlFVA  
RGHPeeVLPRLFHAWGTTRLSFEVDTEPSAQRRDASVAELAAQHGVELIQEVSHtLYDTKRILALNNGKAPLT  
YKHLQSLLASLGPPQKPTPALTREQLQGCCTSNHDTNYEVPTLEELVQDPTELGPHLYPGGETAALARLDTFM  
EKRAWVCSFKKPETAPSSLSPTTVLSPYLALGCLsARTfWWRLDEVYQGGQeHSQPPVSLQGLLWREffYT  
AGASIPsFDQMLGNPIClQVDWDDNPQHlHAWREGRTGYPFIDAIMRQLRTEGWihHLARHAAACFLTRGDLW  
ISWEEGLKVFEELLLDADWSlNAGNWLWLSGSAFFHRYfHIYSPVAFgKKTDrdGAYIRKYLpILKDFPSEYV  
YEPWKAPLAVQEQAGCLVGTHYPQPIVEHRAASKRNLERMRAARAQK  
>Indicator\_macu\_NXN16223.1  
MAHHSIHlFRKGLRLHDNPtLLAALQSSQLLYPLYILdQDfLTSVLHMGALRWHfLLQsLEDLQqSLCQLGSC  
LLVAQGDYEAVLRELvQQWNITQVTLDAEVEPFYKEMeAKIRCLGEELGFEVLSLVGHSLYDTKRVLdLNGGS  
PPLTYKRfLHILSLLGDPeLPVRNLTAEDfQRCQPPAPGLAERYRVPLPADLKVPAQSLSPWRGGESEGLQRL  
ERHLADQGWVtTfTKPKTIPNSLLPSTTGLSPYfSLGCLSVRTFFYRLAKIYAQAKHSLPPVSLQGLLWRE  
FFYTVASATPNfTRMAGNPIClQISWAEDAERLHRWKTaQTGFpWIDAIMTQlRQEGWihHLARHAAACFLTR  
GDlWISWEEGMKVFEELLLDADYSINAGNWLWLSASAFcPQAHRILCPVRfGRRTDPQGHYIRKYLpILKNfT  
SKHIYEPWTASEEEQKQAGCIIGQDYFPfPMVNhKEVSDHNLELMRQAREEQHRRaQLTR  
>Indicator\_macu\_NXN17905.1  
RfLLQsLEDLDNslRKLNSRLfVVRGQPTDVFPRLfKEWGVTRLTfEYDSEPFgKERDAAIVKLAKeAGVEVV  
IENSHTLYDLDRiIELNGHKpPLTYKRFQAIISRMELPKKPVSTVISQqMETCKVDIQENHDDVYGVPSLEEL  
GFPTDGLAPAVWQGGETEALARLDKHlerKAWVANYERPRMNANSLLASPTGLSPYLRFGCLSCRLfYYRLWE  
LYKKVKRNSTPPLSLYgQLLWREffYTAATNNPKfDRMEGNPICIQIPWDRNPEALAKWAEGKTGFpWIDAIM  
TQlRQEGWihHLARHAVACFLTRGDLWISWESGVRVfDELLLDADfSVNAGSMMWLSCSAFFQqFFHCYCPVG

FGRRTDPSGDYVKRYLPKLGKGFPSRYIYEPWNAPESVQKAAKCIIGVDYPKPMVNHAETSRLNIERMKQIYQQ  
LSRYRGLCLLASVPSCVEDLSGPVADSASGQGCSTSTVLRLSQAQASPKRKHEGAEEELCTEELYKRAKVTEL  
PAAELPAKSL

>Indicator\_macu\_\_NXN18583.1

SGEKSHQGLAQLFLPFSSSVLKVDYDVCSNYGNWLYSAGLGNDPRDNRKFNMIKQGLDYGNGDYVRLWVPEL  
QGKIGADIHTPWALSSAALSQAGVTLGETYPEPVVTAPEWSRHISQRPQGRGPHPRSRRGPTHMPAQHKDRGI  
DFYFSRKKDV

>Ischnura\_eleg\_\_XP\_046383944.1

MNPAAIQFIKTENVSTSAGQGQISDILLKLDRDRNKVASSAAAYDFNLKRVRLMSETEKIPDRMQGVVYWMSR  
DARVQDNWAMLFSQLIALKHRVGLHVCFLVPKFLDATIRHFKFLLGGLRVVESDLKKLNIQFHLLRGKADDV  
LPEFVEKNSIGAVVTDFSPRLRTPLSWVKSFKKLNPSIPFWQVDAHNIIVPMWVTSNELEYAAYTIRGKIKHHL  
PEFLTHFPPVISHPYPGTVKAEVDWAAAEASLQVDQSVKEVSWAVPGTSAGLNYLQSFVANRLQLYATKRNE  
PTVKAQSNLSPWIFHFGQISIQRCVLEVQEKRPKCPESVDGWVEQAVIRRELADNFCYFNPNYDNLNGADQWAK  
DTLNNHRKDKREYVYSLAQFEAARTHDDLWNASQIQMMREGKMHGFLRMYWAKKILEWSESPDDALSISIIYLN  
DRYNLDGRDPNGYVGIMWSICGIHDHGFPERPVLGRIRWMSYEGCKRKFDVMSFVSRYGAKKYRYEGKK

>Ischnura\_eleg\_\_XP\_046393096.1

MGNDNPEKHTVHWFRKGLRLHDNPSLREGLKGATTFRCVFILDPWFAGSSNVGINKWRFLQLQCLEDLDRSLKK  
LNSRLFVIRGQPADALPKLFKEWGTTFLTFEEDPEPFGRVRDQNI IAMCKENGIEVCSKVSHTLYKLENIISK  
NAGKPPLTYHQFQKVVASMDRPECAAPPITAPFVGSAYTPVLDDHDDKYGVPTLEELGFDTEGLLPPVWQGGE  
SEALARLERHLERKAWVASFGRPKMTPQSLLASQTGLSPYLRFGCLSTRLFYYQLTDLYQKIKKARPPLSLHG  
QILWREFFYCAATQNPNDKMGNPICVQIPWDKNQEALAKWANGQTGF PWIDA IMAQLREEGWIIHHIARHAV  
ACFLTRGDLWISWEEGMKVFEELLLDADWSVNAGMWMWLSCSSFFQQFFHCYCPVRFGRKADPNGDFIRRYIP  
ALKNFPTKYIHEPWTAPESVQKAAKCIIGKDYSVPMVNHAGASRVNMERMKQVYQQLSKYRGAGSEHRPSAKE  
CFVGLLATVPIAPSAWTSQSSKETKENRPATQNTKNDVNAQKSLSTSPKLIISSDIASREA

>Ischnura\_eleg\_\_XP\_046403167.1

MVGSIAHWFRKGLRIHDNPALLAVTEKVDGENCIIRPVFILD PWFVKNMRVGNRWRFLQQLMDLHESLKKM  
GSRLYVLKGKPEEVLPIAFRVWNVKLLTFELDIEPYARERDERIEALAKDAGVRVMQKISHTLFDTEAVIKAN  
LGRPPLTYQKLISVVSGLGAPPNPVTMPDKFPKECFVGNEKADVHGEIPGWPEFNPVPSLKD LGVKEEELGPNL  
HHGGTEALKRLSKNIAKKEWICKFEKPNTSPNSLQ PSTTVLSPYLKFGCLSSRLFYKLEVTKGQPRVSQP  
PVSLIGQLLWREFYVVG SATPNFDRMKNPVCCQVPWNPNPEHLEAWTMGRTGYPFIDAIMTQLRLEGWIHH  
LARHAVACFLTRGDLWISWEEGQKVFEELLLDADWALNAGNWMWLSASAFFHQFFRVYSPVAFGKKTDKLGDY  
IRKYVPKLAKFPQYIYEPWDAPLSVQKAAGCIIGVDYPKRIVIHESVSKANIQRMSAAYKSNKERKAGEEDE  
GAPKSKSGNTKKRASDS DPLSSSANKKSKTKGNKSIANYFEK

>Ischnura\_eleg\_\_XP\_046405998.1

MSELDFFPKKTERGSALIWFRHGLRLHDNPALHEALKDCSQFYAVFIFDGESAGTKLVGYNRMKFLLES LADLN  
DQLERRGGKLYLLKGTPSTIFKRLHEEVGLAKICFEQDCEPIWKERDNSVKTTCEELGMKCEKVSHTLWDPK  
EIIQTNGGKPLTYQLFIETVPLIGEPRRPVQDV EWTNIKFGILPDHLLDEF EAFSSIPSPEAFGLEPEVKDK  
SPVVRWIGGETHALHQLTKRLQVEENAFKNGVYLPNQANPDLIGPPTSLSAALRFGCLSVRRFYWEIHDVWMK  
IRGKDCPPSDSITGQLIWREYFYTMSVDNPFYAEMERNPICLTIPWVDDDENLQKWAKGETGYPFIDASMRQL  
LLEGWIPHAARNAVACFLTRGDLWISWEKGLSVFLYHLLDADWSVCAGNWMWVSSSAFERLLDCTMCVSPVSY  
GRRLDPWGTYIKRYVPELSGFPPEYIHEPWKAPIVVQESAGCIIGHDYPERIVDHAVASKRNQKYMEAIRNSL  
MSDFPAPHCCPSNEDETRHFLMMDDAEIDHVV

>Ixodes\_sca\_XP\_029833167.1\_cry-1

MSTSQTSTTAESGGRNVVHWFRKGLRLHDQPSLRVGLQGARTCRCIYILDPWFAGSSNAGLNKWRFLQLQCLED  
LDARLRKLNSRLFVIRGQPADVF PKLIK EWRVTHLTFEKDPEPYGAIRDQNTALAHMGVTVVCEPSHTLYP  
LERILERHGGKAPLTYRQFQGV LVAMEPPPAPVPAP EALPRTPIDEDHDDRFAVPTLAE LGFDTDNLKD AVWP  
GGETEALARLERHLERKAWVASFGSPKMTPKSLLASQTGLSPYLRFGCL SARLFYHQLADLYRKIKKSNPPLS  
LQGQLLWREFYCAATRNPNFDRMHNNPICVQIPWDVNAEALAKWANGQTGYPWIDA IMRQLREEGWIIHHVAR  
YAVACFLTRGDLWLSWEEGMKV FDEL LLDADWSVNAGSWMWLSCSSFFQQFFHLYCPVRFGRKADPSGDFIRR  
YLPVLKHFPNKYIHEPWSAPEQVQVAARCVGRDYPLPMVNHQDASRVNLQRIRQVYQQLTQCTKAPGLFPSV  
PSGSPTSADKASNKFIEDLKLTKGNAMQDDEESMEGVV

>Klebsormidium\_nit\_Photolyasec\_GAQ87857.1

MASVQCECRGALVGAGPLTVLVGPAGAGKSSTVNAVFG RHFLAAKPAEASAGRFKLEECVQTINGSKVVVLEA  
SGLSKAKDVEELRKSLSKKRKTVDLVLLVEALQQAGSVDVASEMGAKFGAQLLNAAVPVFACGHVQEEADEES  
KALYAKRSAAVLAAFGANGAEVPSRVI PLELEGASVCEEGLKV VLEEMRRVRAQKTPAFVPATMDADLKDLS  
LVMDHNMSVASFNAAPAFLPKQAPVKVV RAPTK EAAAPAPPAKLAEAAPKAPVQQSFPAPPPNVAGAASISIAV  
QSAASMLAPALQAAAATQVKKLRLNRGGVPMIAPRSPIDCPAIKVTKTLVPARDA AASKTTMLSSAASSFAPV  
AAAVLAPSKPAANNKLMGLSAFPDMQKLRGGDFAGPAGAAAARNVSI VWFRNDLRVHDNEALAMAQQASSSIV  
PVYCFDPRDYGKSSSGFDKTGPYRAKFLIECVADLRKNLRERGS ELVVRI GKPEEVLADLARKTGAKTLFAHQ  
EVTHEELQSERKVCAALKDAGVQAKFFWGSTLYHIDDL PFKLESMP SNYAGFREQVKDLKVRKTA AALKTLKG

LPKLSSVEVGKVPTLQDLGLDASKSTRHETGAQALIGGESEALDRLKSFVADATAGAKKAADNLNGANFSCKI  
SPWLAMGCLSPRRMYEDLAASGGARAITATAQKSPSEDANGLSWLTFELLWRDFFRFITKKYGTANKSASTAA  
SPASAMAVAV

>Klebsormidium\_nit\_GAQ77897.1\_photolyase

MVSILRSASCPTAKAVSNCSAKWALRQLAPAQPIIARHVSKPARLNLHPTFTTPARSSVRGIPQPSGSPFPHRR  
AEGSFRSRAAQFKNQVGEFGFASFGSLGATSINLETVSTPSLPSSFRGSPLQGSWTLVGFVRVRSAGGHRQGRG  
FCTQAAAREFVIKETDMASTKETPVILWFRSDLRLHDNEALVRAAEASDSVVPVFCFDPRIYGRITYHFGFQKT  
GPLRAQFIWDAVSDLRQQLRQRGADLLVRVSNPEDVIPSLAKSVGAQRVFASLETCSSEEKAVERRMLHKLQEG  
NSRGFLELVWGGVTMYHIDDLFPFAAAVPDVYTQFRKGVESRSKVREPLKIPKLKPIISKEVLGKIQAAGGPGE  
MPRLEALGVDPQAMDPRGVLPFKGGETAALERLNDYFWTKDCLKEYKETRNGMLGGDYSSKFSAWLAHGCI SP  
RYIHSEVRRYERERVENKSTYWLLFELIWRDYFRFISIKFGDKLFKLGGLRDVRGKEWGQNKQLFDTWREGRT  
GYPLVDANMKELAATGFMSNRGRQIVCSFLTRDMKLDWRLGAWEFETCLLDYDPCSNYGNWYTGAGVGNPRE  
DRYFSIPKQAQNYDSEGAYVAYWLPEIAKLPTYKRHAPNTLTREEQDKYDVEIGPGGYAPVVPPLLHGQPGGG  
GRGGGFSGRGRGGGRDGRSGRGRGGRDGRAAKF

>Klebsormidium\_nit\_GAQ81945.1\_photolyase

MASKRKAPSRGAEGADVKELEKAVKKGKNAAGKAVESTAGAVKDAAGGAAKAVKKATEKVAEVPKAAAKAVL  
PSSAKDEGAGPSSKTPPLSRLPADLNKLVDPKRVMTLREGEVTGTGPVLYWMSRDQRSADNWALLYAIEQAHK  
QGSSVAVIFNLVPRFLHAGARHFGFMLRGLRVMENLKEKDI PFFIVQGEVDTIVQFVAKVGTSLLVTD FSP  
LRIAREWKGGVCSLVNIPVHQVDAHNVPVTPWVCSDKQEY GARTIRTKVHRNLPEFLVEYPELPSNPKNWALEP  
PAPIDWEALLKIVLSNKAVPEIDWAVPGEDAGMEWLLKRF LGKGI AKYDADRNDPTIPTGVSGMSPYLHYGNV  
AAQRAALEARKYRKSHPKAVDAFLEELIVRELS DNYCYQPNYDNLQGAFFWARES LQKHAADPREYVYTKE  
QLEKGQTYDELWNASQHEMVHHGKMHGFM RMYWAKKILEWTPSPEEALAI AIELNDKYEIDGRDPNGYV GCMW  
AIAGVHDQGWGERPIFGKIRYMN YAGCKRKFKVDKYVAYVNKLMSDLKTKGKSSAAREKKPV

>Klebsormidium\_nit\_GAQ88501.1\_photolyase

MEPVTVVWFRDLRLLEDNPALISAARMGTVPVFIWAPEEEGQFQPGRC SRWWLKQSL LHLDVTLQKMGAPLI  
LRRCADSATMLLDIVKETGATQVFYNHLYDPVSLVRDHRVKQSLVQHGVVVHTFNADLLYEPWEVYDEQGH PF  
TVFENYWNKCLNMPFEPDAPLLAPKKLSGIEIEVPSLSLDGIGLEDPLEASSNSLLARAWAPGWSNADRALES  
FLRGALASYATARTKTDTTTTSLSPHLHFGELSVRKIFHESRKLQLLWSRDGASVAVTSVDLFLRSIGLREY  
SRYLSFNFPFTHERSLLANLKSFPWAIDEKAFKAWRQGR TGYP LVDAGMRELWATGWLHNKIRVVASSFCVKF  
LQLPWRWGMKYFWDTL DADLES DVLGWQYISGSLPDGHELD RMENPHVEGYKYDPEGEYVRRWLP ELSRLPT  
EWWHHPWDAPSNVLRAAGVELGSNYPQPIVDVEAARERLAASLSAMWASEAALKAGGLEEGLGETPAVAVGAG  
ISGFGRSSAAGSSRRDQMV PDMAPAPSLAAEEAAAHI LGHQEAYQHELSSPTPPERLDASSAERPVDQAQFLP  
GFRELNQDGAGLMREPQLPLRRGSESDILSTAESSYPRPSEGGANAPKVPDPKNSWPYASPD LASGLQAAAD  
AARAQTYTGIPFNKKHLELQDGTPLEDPLMKRSRMRQMASPPIQGR

>Klebsormidium\_nit\_GAQ91785.1\_photolyase

MSSLMWFRKGLRLHDNPALLAAIEGAKHVYPVFI LDPYFLRPDPTAPSPGSTRVGINRIQFLLQSLQDL DQGL  
QARGSRLLL VHGD PVEIIPSMITQWRVNR LCFERDTEPYAKERDARVKELAAELGIKELVTPSTHTL FDPDET  
IARNKGHVPTSYGQFCKAIGTPAEPLEAPTSIPGPDPEKKGIPTISVPTLTELGYGESDQEFLQQIVKGGETE  
ALARLEVMAKT D W VAKFEKPKTDPSAFAEPATTVLSPYLKFGCLSPRLFYSKLMAIYQKKTGH SKPPQSLEG  
QLLWREFFYTVGHATPRFDCMVGNSLCKQVPWTD D DALLAAWRDAKTGYPWIDAIMTQLRQQGWMHHLARHAV  
ACFLTRGDLFVYWEKGRDVFDRLLIDG DWSINNGNWLWLSASAFFSQYFRIYSPITFGQKYDKSGKYIR RFLP  
VLKDFPAQYIIEPWKAPLDVQKAAKCVIGVDYPGPIVDHAEASKQCKERMAAAYALAKQSTDLP SQEAVEELR  
RTVNPGGV KRKEQYGAAGSMAPAGKSKSGDIRKYLKK

>Labrus\_berg\_\_XP\_020487077.1

MSKDKCNCECPYTFRAF PKQDTVEGGDQMMNMGDLTEN EKPKR SKNRRQRK GACHHVGLPPSP SARPPVLL  
WFRDLRLCDNPALNGSLEV GAPVPIPIFIWSP EEEEGPGITVAMGGACKYWLHQALSCFCSSLECIGSRLVFL  
KAKAAKNEVGPTLHCLKELVKETGATTVFANALYEPWLKDRDDEVVS AFKKDGVEVKMFHSYCLKDPYSVSTE  
GVGLRGIGSVSHFMSCKQNP GSALGVPLDPPVSLPTPAQWPQGVSLDGLGLARMPRRKDGT TIDWAANIRKS  
WDFTEKGAHARLEAFLQDGVYRYEKDSGRADAPNTSCLSPYLHFGQLSPRWLLWD AKGARC RP PKFQRKLAWR  
DLAYWQLTLFPDLPWESLRPPYKALRWSVDHGH LKAWQRGRTGYPLVDAAMRQLWL TGWMNNYMRHVVASFLI  
AYLYLPWQEGYRWFQDTLVDADVAIDAMMWQNGGMCGLDHNWFIMHPVDAAMTC DPCGSYVRTWCPELADLPE  
ELIHKPWKCP TSM LRAGVVF GQTYPERIITDLDERRNHSLQDVALVRKEFSQYVDKRSGCDLVPLPPRLVSE  
ALGLSHRDGGVVKEGKQFLLPVITRMEFKHQLEDPDADAASNPNYNAV LKGYVSRKRDE TIAFLNERDFTASVM  
YEGTQRRERLES DYRRMEGLPTPPAARGARRPTAKDRFSVVPGGAVTS LR

>Labrus\_berg\_\_XP\_020497213.1

MVNSVHWFRKGLRLHDNPALQEALNAADTVRCVYI LDPWFAGAANVGINRWRFLLEALEDLDNSLRKLNSRL  
FVVRGQPTDVFPRLLKEWNVTRLT FEYDPEPYGKERDGAIIKMAQEFGVETIVRNSHTLYNL DRIEMNNNSP  
PLTFKRQFQTI VNRLELPRRPLPPISQQQMDKCHAKIADNHDQLYGIPSL EELGFRTVGLSPA IWHGGESEALD  
RLNKHLDDKKVWVANFEHPRVNMCTLYASPTGLSPFLRF GCLSCRVLYYNLRELYMKLRKSSPPLSLFGQLLW  
REFFYTAATNNPNFDRMDGNPICVQIPWDQNPEALAKWAEGR TGFPWIDAIMTQLRQEGWIHHLARHAVACFL

TRGDLWISWESGMKVFEELLLDADWSVNAGSWMWLSCSAFFQQFFHCYCPVGFGRRTDPSGDFIRHYIPIILKD  
YPNRYIYEPWNAPDSVQKAANCVVGVHYPKPMINHAEC SRLNIERMKQVYQQLSHYRGLSLLASVPTIQEEAE  
PPMTDESQTSSGPDSPPRSPAGAEAAGCSTAPDSSTVCTPAAYAQNEDLED FENQTPCTSSNTYPSAAITSTS  
TSACLPPSTATPPSPAQSPLSWSKPSTPSSSCPSLPPPPSPATTPTQTSRKDL SRKVRSQRQQGDCSAQQQQ  
QGRKRGGQRRRERMGRGRREWK RASSRRRREWRMRHVERQQDIISDTR

>Labrus\_berg\_\_XP\_020497566.1

MNSWSKVKRIIVTRQSKATSEDFCLQGHLIIIVGDTSPSTFPFSLGILKTAGDMVNTIHWFRKGLRLHDNPS  
LRDSMRGADTLRCIYILD PWFAGSSNVGINRWRFLHCLLEDLDASLRKLNSRLFVIRGQPTDVF PRLFKEWKI  
NRLSYEYDSEPF GKERDATIQKLASEAKVEVMVRISHTLYDLAKIIELNDGQPPLTYKRFQALVSRMEAVEHP  
AETITPDVIKNCVTPI SDDHDHKFGVPTLEELGFDTEGLSEAVWPGGETEALIRLERHLERKAWVANFESPRM  
NANSLLASPTGLSPYLRFGLSCRLFYSKLTDLYIKVKENNSPPLSLYGQLLFREFFYTSATNNPCFDKMEGN  
PVCVQVPWDRNPEALAKWAEGQTGF PWIDAIMTQLRQEGWVHHLARHAVACFLT RGDWLISWEEGMKA FEELL  
IDADWSVNAGSWMWLSCSSFFQQFFKCYCPVGFGRRTDPSGDYIRRYLPVLRGFP AEYIYDPWNAPEEVQKAA  
KCIIGVHYPKPMVNHA EASRINIERMRQIYQQLSSYRGLGLLA AVPSNPSSNM RGVGAGSSQAPRGASENPLT  
QETIPRTERGQMTQKRRYEEALPESCRKYLKQSK

>Labrus\_berg\_\_XP\_020501533.1

MSTSRTVICLLRNDLR LHDNELFHWQRNAEHIVPLYCFDPRHYVGTYNYNLPKTGPFRLRFLLESIRDLRNT  
LLNKGSNLVVRQ GKPEEVVADLIKQLGSVSTVAFHEEVTSEELNVESRLKDVCAQM KVKVHTCWGSTLFHRDD  
LPFPHMSRLPDVYTQFRKAVETQSRVRPLLP TPEQLKPLPQGLEEGA IPTAEDLLQTEPMSDPRS AFPCSGGE  
SPALARLKH YFWDTNAVATYKETRNGLMGV DYSTKFAPW LAMGCISPRYIYHQIQQYERERTANQSTYWVIFE  
LLWRDYFKFVAVKYGNRLFQIQGLQDKSVSWKKDKKLFDAWKEGRTGVPFVDANMRELALTGFMSNRGRQNV A  
SFLTKDLGLDWRMGA EWFEYLLIDHDVCSNYGNWLYSAGIGNDPREN RKFNMIKQGLDYDSNGDYVRQWVPEL  
QGIRGADAHAPWTLSSAALSHAQVSLGETYPTPVVMAPEWSRHVNKKPSGAGPSPRGKKGPSHTPKQHRDRGI  
DFYFSKSKNL

>Labrus\_berg\_\_XP\_020506634.1

MSGKKRKAPTSAAKEPSAKQQKLAPCKEEKQERAGGWLQDHLKQQRTEKKDMKFNKKRLRFVSKAEDVKQGSK  
GVLYWMSRDQ RVQDNWALIHAQQ LAVKENLPLHICFCLVVPKSELSTLRHFSFMLKGLKEVAEECKTLDIQFH  
LLHGSAGEVLPGFVSDRGLGAVVTD FCPLEQMQWLEDVKNLLPKDIPLIQVDAHNIVPCWVASPKLEYAART  
IRGKITKLLPEYLTDLPLVEQH PYTATRTAKPIDWDET LASLKVDTKVGETDWAKPGTKAGVAMLESFIDVRL  
KLFDTKRNDPNAHALS QLSWPWIRFGHLSAQ RVALQVQHSGKTAGVTVASYIEELVVRRELTDNFCFYNNKYDS  
VDGAYEWAQKTLKD HAKDKRPYLYTREQLEKAKSHDKLWNGAQYQMVSEGKMHGFLRMYWAKKILEWTSSPEE  
ALSTALYLND RYSLDGQDPNGFVGCMWSICGIHDQGWAERP VFGKVRYMNYKGCLRKF DVARFEKQYCPKNL

>Labrus\_berg\_\_XP\_020513567.1

MAHTCIHWFRKGLRLHDN PALIAALRDCKELYPVFILDPYLHNKTSVGINRWRFLIGALKDLD CSLRKLNSRL  
FVLRGKPEDVFPKLFNQWKVTMTYEFDTEPYSLSRDKTVTTLAKDHGVEVIYKISHTLYDIERIIEENNGKA  
PLTYTRMQAIVKTLGP PKRPISAPTVEDMKDVKTPSFKKHEEEYGLPTLEELGHNTSALFEEKFP GGGEQ EALR  
SLDEHMQRTGWVCGFEKPQTS PNSLSPTTVLSPHVTFGCLSARTFWWRLTDVYQGRHSDPPVSLHGQLLWR  
EFFYTASVGVPNFNKMEGNPVCTQVDWDTNPEYLA AWREARTGFPFIDAIMTQLRQEGWIHHLARHAVACFLT  
RGDLWINWEEGQKVFEELLLDGDWALNAGNWQWLSASTFFHQYFRVYSPVAFGKKT DKNGDYIKKYLPLLKKF  
PAAIYIYEPWKAPHSVQQAAGCIVGKDYPRPLVEHEVISKKNIQRMKLAYAKRSADSES PSKKQGVKRKQPSVA  
DFMKKKEKKK

>Ladona\_fulv\_\_KAG8231453.1

MRSRNPENKVTLLWFRHGLRLHDN PALLEALRCSKEFYAVFIFDGESAGTRVIGHNRLKFLLESLS DINSQL  
QSHGGKLYLLNGKPFEIFKTLKEEVGLQKICFEQDCEPIWKERDDSVKDL CQEIGIECV EEVSHTLWDPRVVI  
ETNGGIPPLTYQMFLHTVAAIGPPPRPVQDADWTGVNFGILPKKVVDKFEAFTSVPSPEEFGLVDNTKSKGPK  
VRWIGGESNALKNLSFRLEVENNAFCNGIYLPNQVNPDLIGPPTSQSAALSFGCLS VRKFYWA IHDLFNQVYG  
ENLSNESITGQLIWREYFYTMSVDNPFYAEMKRNPICLDIPW HEDQENLESWKQGKTGYPFIDAAMRQLVQEG  
WVHHAARNAVAFFLTRGDLWISWEHGLAFFLYY LIDADWSVCAGNMMWVSSSAFEKLLDCSQCVSPVSYGRRL  
DPCGIYIKKYVPELSRFPIEYLHEPWKASLELQQSCGCIIGRDYPERIVDHNVASLRNRKYMEDICLSLMISP  
PKHCCPSDEEETRFLMITQEDVDHIH

>Ladona\_fulv\_\_KAG8231874.1

MEAAETHDDLWNSAQIQLSKEGKMHGFLRMYWAKKILEWTESPEEALSIAIYLNDRFSLDGRDPNGFVGCMWS  
ICGIHDQGWAERAVFGKIRYMNYEGCKRKFDVAAFVARYGGKKYPYKGGK

>Ladona\_fulv\_\_KAG8233196.1

MAKGSVIHWYRKGLRVHDNPALLAATEKINGEY YEILPVFVLDPWIVKTM RVGPNRWRFLQQSLKNLDENLRK  
IGSRLYVLRGKPEDVLP EAFKAWKVKAITFETDTEPYARERDERIETLAKKAGVSVIQKTSHTLYNPEAVLKA  
NLGKPPPLTYQKFLSVMNGMGPPPKPVMMPKNIPVGCLGYDAMKDKGSKLP GGPEYGVPSLSDLGVSEESLGPS  
LFPGGETEALNRLSKFTAKKDWICKFEKPNTSPNSLQ PSTTVLSPYLKFGCLSPRTFYYKIQEVIKGQSRVSQ  
PPVSLIGQLIWREFYYVVSATPNFDKMEGNPVCLQIPWDVNKEYLEAWSKGKTGYPFIDAIMTQLRSEGWIH  
HLARHAVACFLT RGDWLISWEEGQKVFEELLLDADWALNAGNMMWLSASAFFHQFFRVYSPVAFGKKTDKLGD

YIRKYVPQLAKFPPQYIYEPWEAPLSVQKAAGCIIGDDYPKRIVIHETISKINIKRMSEAYKKNKESKIKAE  
DVEQ

>Ladona\_fulv\_\_KAG8235753.1

MGSEKTEKHTVHWFRKGLRLHDNPSLREGLKGATTFRCVFILDPWFAGSSNVGINKWRFLQLQCLEDLDRSLRK  
LNSRLFVIRGQPADALPKLFKEWGTTFLTFEEDPEPFGRVRDQONITAMCKEIGIEVCSKVSHTLYKLEDI  
NNGKPPLTYHQFQMVVASMDPPEPAAPPPIVKSFVGSAYTPISDDHDEKYGVPTLEELGFDTEGLLPVWQGE  
TEALARLERHLERKAWVASFGRPKMTPQSLLASQTGLSPYLRFGCLSTRLFYYQLTDLYRKIKKAPPPLSLHG  
QILWREFFYCAATHNSNFDKMAGNPICVQIPWDKNQEALAKWANGQTGFPPWIDAIMTQLREEGWIIHHLARH  
ACFLTRGDLWISWEEGMKVGSHDKVFEELLLDADWSVNAGMWMWLSCSSFFQQFFHCYCPVRFGRKADPN  
IRRYLPVLKNFPTKYIHEPWPMAPESVQRASKCLIGKDYSPMIKKAPPPLSLHGQILWREFFYCAATHNSNFD  
KMAGNPICVQIPWDKNQEALAKWANGQTGFPPWIDAIMTQLREEGWIIHHLARHAVACFLTRGDLWISWEEGMK  
VSHDKVFEELLLDADWSVNAGMWMWLSCSSFFQQFFHCYCPVRFGRKADPN

>Lampea\_lac\_AQX17843.1\_putative\_p

MSGVALHWFRKGIRLHDNVPLTKAIESCSTLIPIFILDFTDPLDPKKVSANRLGFLLDLKLCLDEDLQERGSRL  
IVAKGKPSEVIFSLIEEFKINKLTFERGTEPFNKDLDELIGIVNANDIEVYSNWGHILFNPDHILALNNGKT  
PVTMNVFLKLASSAPTLPKPIPAPEKIPPPADFKPKNVEIFISTPTLSDLKEYGYDPEAMTTWFKAGEKEGI  
KIMEDFLKQKQVRASFEPKTKPTALLPDTTALSPYLSVGSLSVRLFYHKLLEVLKSFKRHSKPPVSLEGQLY  
WRELTYLIGYSTPNFQHMRNPLCYQIPWTEGEAAQEALKKWEMGTGYPVDAAMNQLRSDGWMHHLARHLV  
ACFLTRGDLWISWELGRDVFDDKYLDADWSINNFSWHWMSCAFFYQFFRCYGPVSFFKKTDPNGDYIRKHVP  
ILAKYPVKYIYEPWEAPKNVQEAAGCIIGQDYPRIVEHKTQVSNANMGKLLKAYDKNKADRAKPAKVNAEKLE  
KPLAKSKLR

>Laodelphax\_str\_AV27638.1\_cry\_1

MSDEMSSSVLWFRHGLRFHDNPALHAAIKKEDNFYPIFIFDGESAGTKVIGSNRMRFLESCLKDLDTQLQNVG  
QRLFVFKGSPVKIFDWMAKSIKMTLCFEQDCEPIWAERDNAVKNFCDGAGVKCVEKVSHTLWNPKEVIEANG  
GVPPPLTYQMFLYTVSTIGNPPRPEADVDSKVKFGKLPEDIPDDIFLYAGVPTLEDNFMHAYDGGERMVRWVG  
GETNAIANLRNRLVEEEAFRCGFYLPNQANPDVAPPTSQSAALRFGCLSVRRFYWTLHDLFNEIHEGKLT  
NQNITGQLIWREYFYTMSVDNIHYGEMTRNPICLDIPWMPKTNKLHNEFLQRWKEGMYGPFIDAAMRQLLQ  
EWIHHVARNASFLTRGDLWLSWEAGLRHFMHLLDADWSVCAGNMMWVSSSAFEQLLDCSHCVCPVNYGRR  
LDPWGVYVKRYVPELRNFPVQFIYEPWKLPLEDQEKYNCVIGRDYPERIVEHKVASQINRKKMEHIRDSLMSK  
VPHCCPSSAEEVRQFMWLPENCSDHVCVPN

>Laodelphax\_str\_AV27639.1\_cry\_2

MTGEAVAKQQCGWSQDMVGGGGGRGGVQRGPEGGGGNKKQVGGQKHTVHWFRKGLRLHDNPSLREGLKNAATF  
RCIFILDPWFTGASNVSKINKWRFLQLQCLEDLDNSLKKLNSRLFVVRGQPADVLPKIFKEWGTNTLTFEEDPEP  
FGRVRDQNVMAICKEMGISVVSXSVSHTLYRLDDIIEKNGGTAPLTYRKFTVVASLDEPPQAEPTVTAKVGA  
AVTPIADDHDEKFGVPSLDELGFDTEGLLPVWQGESEALARLERHLERKAWVASFGRPKMTPQSLLASQT  
LSPYLRFGCLSTRLFYYQLSDLYKKIKKAAPPSLHGQLLWREFFYCAATNNSNFDVMGNPICVQIPWTNNP  
EALAKWANGQTGFPPWIDAIMHQLREEGWIIHHLARHAVACFLTRGDLWVSWEKGMVVFDELLDADWSVNAGM  
MWLSCSSFFQQFFHVYCPVRFGRADPSGDFIRRYVPALKNFPSAYIHEPWNCPIELQKSACIIIGEDFPLPM  
VNHVQASRVNMRERLKQVYSRLAEFRNMMHMLMRPLSPSGPTTSNGVMTMLMDNCEISVNGLKHERNNAKEAI  
DKGLFNTPLPKHKDKLNQKRYIMHK

>Laodelphax\_str\_RZF47186.1\_LSTR\_LSTR0

MASKSDKSPPAKKQKLDDVPSKSDTKSGSSLIKELKEKRNKTAASILQFKFNKNRVRILSEAKDVPDRAEGI  
VYWMFRDERVQDNWALLFAQKLALKNKIPLHVCFLKPRFMEATIRHYKFLKGLLEEVAEDCKKLNIQFNFLI  
GDGERVLPGFVEKNSIGAVVDFMPLKGPMWAEQLKKTLPKDVPLCQVDAHNVPCWIASDKQYEGARTIRN  
KINNKLKEYLTEFPPIKHTYGTVKDEVIDWEGGEKTELVDRSVEPVKWLTPGYSGAIQMLDSFINKRLKKFA  
TKRNDPVVDALSNSPYFHFQGISVQRAILTVREHRSKCPESVDAFCEEAIIRRELADNFCFYNNYDNINGS  
FDWAKKTLNDRKDKREYIYTKEELENAKTHDDLWNSAELQLLKEGKIHGFLRMYWAKKILEWTTSPPEALEI  
SIYLNKYSMDGRDPNGFVGCWMSICGIHDQGWAERNVFGKIRYMNYAGCKRKFDAAFVARYGGKSYPYKKS  
K

>Larimichthys\_croc\_\_KAE8291179.1

MSDKKRKPTSAASAAAGSSAKLQKLTPMKEKAGGWLQDLMKQQRTEKKDMKFNKKRLRVISDTEKIKQGSEG  
VLYWMSRDHRVQDNWALIHAQQQLAVQENLPLHVCVCLLVPKSELSTLRHYSFMLKGLEEVAKECKALDIQFHL  
LHGAAGDVLPGFVSDRSLGACGDGLLPQRATAVVDHNVVPCWEASPKLEYAARTIRGITKLLPEFLTD  
LVEKHPYTATRTAKPVDWEKNQASLDVDRTVREPEWAKPGTKAGVVMLESFIDVRLKLFETQRNDPNAAALSQ  
LSPWIRFGHLSAQVALQVQVRSKGNAGQSVSSFIEELVVRRELTDFNCFYNNKYDSIEGAYEWAQKTLKDHAK  
DERPYIYTREQLEKAKTHDKLWNAAQYQMLTEGKMHGFIRMYWAKKILEWTTSPPEALSIALYLNDRYSLDGQ  
DPNGFVGCWMSICGIHDQGWAERPVGKIRYMNYKGCRLKFDVAQFEQKYCPKNI

>Larimichthys\_croc\_\_KAE8296035.1

MVNSVHWFRKGLRLHDNPALQEALNGADTVRCVYILDPWFAGAANVGINRWRFLLEALEDLDSSLKKLNSRL  
FVVRGQPTDVFPRLLKEWKVTRLTFEYDPEPYGKERDGAIIKMAQEFVETIVRNSHTLYNLDRVIEMNNNSP

PLTFKRFQTIVSRLELPRRPLPPITQQQMDKCRTKIADNHDQLYSIPSLLEELGFRTEGLPPAIWRGGESEALD  
RLNKHLDKKVWVANFEHPRVNTCSLYASPTGLSPYLRFGCLSCRVLYYNLRELYMKLRKRCSPPLSLFGQLLW  
REFFYTAATNNPNFDRMEGNPICVQIPWDQNPEALAKWAEGRTGFPWIDAIMTQLRQEGWIHHLARHAVACFL  
TRGDLWISWESGMKVFEELLLDADWSVNAGSWMWLSCSAFFQQFFHCYCPVGFGRRTDPSGDYIRRYIPILKD  
YPNRYIYEPWNAPESVQKAANCVGVDPKPKMINHAEGSRLNIERMKQVYQQLSHYRGLSLLASVPTIQEEAE  
PPMTDESQTSSGPDSPRPDPEDAVDGYESQTPCNPSGLHTQPSAAITSTSACHPSSKAVPPTQSPLSRSKPSS  
PSSSCHSSSPSPATPSSQTSSLGQRRKGITRKMRRSQRRGRQSCTPTAKEGDRRSEEEEREERMEEDAEQ  
DEERMEEETFGEAAGHQQ

>Larimichthys\_croc\_\_KAE8296365.1

MSPSAAAGAEDSKALVRRMLREVLVGREDPEGFFVMCLLSALGHQETRSQFVSLIQPLSTANSSLHCTLTSTIYR  
EYFSKTEDDELELAMVLSLLEMKDHRLSTPSQESRCRQTGDRADRRKNINLPQGEPPWKVSPPPQTARETDLEK  
STHVYKYNTETLGTSTQTVCVSTLSGSISKQDKFEQGYQKMNEGDSNQSEKPKRSKNRRQRRKGPCQQIVGLPC  
SPSAPPPVLLWFRDLRLRDNPALICSLFEGAPVIPVFIWSPEEEEGPGNTVAMGGACKYWLHQALSCFCSSSL  
ERIGSHLVFLKANHEGNKVGSSSLTLKELIKETGARTVLANALYEPWLKERDDAVVSSLQKDGVEFRMFHSYC  
LRDPYSISTEGVGLRGIGSVSHFMSCCRQNPGSALGVPLDPPVSLPTPVPWPQGVPLDTLGLARMPCRKDGTA  
IDWAANIRESWDFSEEGA HARLEAFLHDGVHRYDKESGRADAPNTSSLSPYLHFGQLSPRWLLWDSKGARCRC  
PKFQORKLAWRDLAYWQLTLFPDLPWDSIRPPYKALRWSTDRSHLKAWQQGQTGYPLVDAAMRQLWLTGWMNNY  
MRHVVASFLIAYLYLPWQEGYRWFQDTLVDADVAIDAMMWQNGGMCGLDHWNVFMHPVDAAMTCDPYGSYVRK  
WCPELASLPDELIHKPWKCPASMLRRAGVVFQGTYPERIVTDLEERSQSLQDVALVRKEFRHYVDKRSgcdl  
VPLPPRLVSEALGLSHRDGDVVTAGTQFLLPVITRMEFKHQLEDPEADAASNPNYAVLKGYSRKRDETIATFF  
NERDFTASVMYEGTQRKERLENDYRRMEGLSQLPAPRGRARRTPTANDRFSIVPGGAVTSLR

>Larimichthys\_croc\_\_XP\_010751564.3

MSTSRTVICLLRNDLRLHDNELFHWQRNAENIVPLYCFDPRHYVGTYNNLPKTGPFRLRFLLESIRDLRNT  
LLNVGSNLIVRRGKPEEVVADLIKQLGSVS AVAFHEEVTSEELNVEKQVKDVCAQMKVKVHTCWGSTLYHRDD  
LPFHHSRLPDVYTQFRKAVETQSRVRPVFTTPEQLKPLPSGLEEGA IPTADDLQQTEPVTDPRAFFPCSGGE  
SQALARVKHYFWDTD AVATYKETRNGLIGVDYSTKFAPWLMGCISPRYIYHQIKQYERERTANQSTYWVIFE  
LLWRDYFKFVGKYG NRFLFQVKGLQDKTVPWKKDMRLFD AWNEGRTGVPFVDANMRELAMTGFM SNRGRQNV  
SFLTKDLGLDWRMGAEWFEYLLIDHDVCSNYGNWLYSAGIGNDPRENKRKNMIKQGLDYDNNGDYVRQWVPEL  
QGIKGADVHTPWTLS PAALSHARVSLGDTYPTPMVTAPEWSRHFNKKPSGTGPSRGGKGPHTPKQHRDRGI  
DFYFSRSKNL

>Larimichthys\_croc\_\_XP\_010755355.2

MAHTCIHWFRKGLRLHDNPALMAALRDCKELYPVFILDPHLYNNTCMGINRWRFLIGSLKDLDCSLRKLDSRL  
FVLRGKPEDVFPKLFNKWKVTKLTYEYDTEPYSLSRDQTVTALAKEHGVVEVIYSVSHTLYDIDRIIEENNGKA  
PLTFIRMQAIVKTLGPPKRP IAPPTMENMKDVKTPCSENHEKNYAIPTMEEVGQDTAALEEEKFPGGEQEALR  
RLDEHMKRTGWVCNFEKPHTSPNSLSPSTTVLSPYVTFGCLSARTFWWRLTDVYQGGKHSAPPVSLHGQLLWR  
EFYYTASVGIPNFSKMEGNPVCTQVDWDTNAEYLA AWREARTGFPFIDAIMTQLRQEGWIHHLARHAVACFLT  
RGDLWINWEEGQKVFEELLLDGDWALNAGNWQWLSASAFFHQFFRVYSPVAFGKKTDKNGDYIKKYLPLLKKF  
PAQYIYEPWKAPRSIQQAAGCIVGKDYPHPIVQHEVISKKNIQRMKLAYAKRSTDAAESPSKKQGVKRKSTSV  
IDMMKKKKDRKK

>Larimichthys\_croc\_\_XP\_019118656.1

MVVNTIHWFRKGLRLHDNP SLRESIRGADTLRCIYILD PWFAGSSNVGINRWRFLHLCLEDLDASLRKLNRL  
FVIRGQPTDVFPRLFKEWEITRLSYEYDSEFPFGKERDAAIQKLACEAGVEVMVRISHTLYNLAKI IELNDGQP  
PLTYKRFQALINHMDAVELPAETITLDVIKECAPPISEDHDDKFGVPSLEELGFDTEGLTTAVWPGGETEALI  
RLERHLERKAWVANFERPRMNANSLASPTGLSPYLRFGCLSCRFLFYKLTDLYRKVKRNNTPLSLY GQLLW  
REFFYTTATNNPCFDKMEGNPVCVQIPWDRNPEALAKWAEGQTGFPWIDAIMTQLRQEGWIHHLARHAVACFL  
TRGDLWISWEEGMKA FEELLLMDADWSVNAGSWMWLSCSSFFQQFFHCYCPVGFGRRTDPNGDFIRRYLPILRG  
FPAKYIYDPWNAPEDVQKAAKCIIGVHYPKPMVNHA EASRINIERMKQIYQQLSCYRGLGLLATVPVNPTNGS  
NGSNVGRVNTESSQRPGGSCENPSIQEGTSRTERGSTQKRREDASLESSSKSWKQSK

>Lasallia\_pus\_KAA6407800.1\_cry-2\_

MPAAKRRVIYWFRTDLRLHDS PALKAALDLKPECLYPIWCWDPHYVYRARVGSNRWQYLLDCQSDLSASITKL  
NPKSKLFLIREAPQTLLPKLFKAWKISHLVFEKDTDAYARDRDERVSELAKQAGVEVVVRMGR TLYDPDDLK  
VNGGKPTMSITQVQHAADKLGEVARPIPAPTSIPDPGETSLNFEQTQPSQDPDINATQRSGNESSYTHLSGPN  
GDFAIPTLEELGLKAATTSHRGGETVALAQLDRI IKDTVYTATFSKPATAPTAFSPQATTLLSPHHHFGSLSV  
REFYWRVQAVLANYN GKAKASTVPTNLIGQLLFRDMYFGAQASLGKYAQELGNSHCRFVPWHLPSKVDEKNG  
LITAGYTVDAPQAEWFQRWKHGRTGFPWIDALMRQLRFEGWIHHLGRHAVACFLTRGGCYVHWERGAEVFEE  
WLVDHEVACNVGNWQWLSCTAFYSQFYRCYSPIVFPKKWDPHGDFVRHYVPEL RDPYPEKYIYEPWKAPISDQK  
KAGCLIKGDGTDEEINGMNA YPKPMLDFSERRTVCI EAIKNAYHVNLYGN NPQVLDGTWRALFADDGEGPTEG  
KSSKDGLKHDNERQVKHSADTQNGEAGVDENEGEAAEDGGDNKGDKEGSKRKRGQGTLDGLFTRKKARLEMT  
K

>Lasallia\_pustul\_KAA6416131.1

MLQKRAANGNGIKRKAIPPPDSPRKGPKNGITLYNESPKEEAYGIVQREFYPPPEMTNARCHQYNNNELPRPIE  
LLEAAQEDTKEARENIPVKDAVVHWYKCDLRTDNKALHLAHRKARSKGVPLICMYIVSPQDFQAHLTSPVRV  
DFILRTLAVLKEDLAEGLIPLHVELIEKRKTIPDKIIEWCEKWGASHIYANAHEYVDELREAMMTRKCLDKG  
ISMTVVPDTCVVAPGELSSQQGRQYAVYSPWFRAWVAYLHQHPQLDPYERPGQNPSSAHEKFKDIFEGKIPE  
APENKKLNDEEKKRFHSMWPAGEQEALARLEMFLDQKIGKYKDSRNFASNGTACTSVHFASGTLAARTAIRR  
ARDVNSTTQLDKGNLDIASWISEVAWRDFYKHVLAHWPYICMNKPFKPEYTNIAWEYSPTLFHAWTTGHTGYP  
IVDAAMRQLNTTGYMHNRCRMITASFLAKHLLLDWRLGEIYFMEHLIDGDWASNNGWGFSSASSGVDPQPYFR  
IFNPLLQSEKFDAAGEYIRKWVPELREVPGKAVHDPYARGAAKVAEKEGYPRMVVEHRVARERCLERYKAGLG  
RGTA

>Lateolabrax\_macu\_\_UBK24604.1

MAHTCIHWFRKGLRLHDNPALMAALRDCKQLYPVFILDPHLHNNTSVGYNRWRFLIGALKDLDCSLRKLNSRL  
FVVRGKPEDVFPKLFNEWKVTKLTYEYDTEPYSLSRDKAVAALGQEHGVEVIYKISHTLHDIERIIEENNGKA  
PLTYNRMQAIVKALGPPKRPPIAPTMEIDKDVKTPHSEDHEKKYGIPTLEELGQDTAALGEEKFPGGEQEALR  
RLDEHMKRTGWVCSFEKPQTSFNSLSPSTTVLSPYMTFGCLSARTFWWRLTDVYQGGKHSDPPVSLHGQLLLR  
EFFYTASVGIPNFNKMEGNPVCTQVDWDTNPEYLAARWREARTGFPFIDAIMTQLRQEGWIHHLARHAVACFLT  
RGDLWISWEEGQKVFEELLLDGDWALNAGNWQWLSASTFFHQFFRVYSPVAFGKKTDKNGDYIKKYLPLLKKF  
PAQYIYEPWKAPRSIQQAAGCIVGKDYPHPIVQHEVISKKNIQRMKLAYAKRSANPAESPSSKKQGVKRKAPSV  
VDMLKKKERKK

>Lateolabrax\_macu\_\_UBK24605.1

MVVNTIHWFRKGLRLHDNPISLMDISIRGADTLRCIYILDPWFAGSSNVGINRWRFLHLCLEDLDASLRKLNSRL  
FVIRGQPTDVFPRLFKEWQITHLSYEYDSEPFQKERDAAIQKLASEARVEVIVRISHTLYDLVKIIEELNDGHP  
PLTYKRFQALINRMNAVELPAETITLEVIKNCATPISEDHDDKFGVPSLEELGFETEGGLAKAVWAGGETEALV  
RLERHLERKAWVANFERPRMNANSLASPTGLSPYLRFGCLSCRLFYFKLTDLYKKVKKNSTPPLSLYGQLLW  
REFFYTATNNPCFDKMEGNPVCVQIPWGRNPEALAKWAEQGTGFPPWIDAIMTQLRQEGWIHHLARHVACFL  
TRGDLWISWEEGMKVFEELLLIDADWSVNAGSMMWLSCSSSFFQQFFHCYCPVGFGRRTDPNGDFIRRYLPILKG  
FPAKYIYDPWNAPEEVQKAAKCIIGLHYPKPMVNHAEEASRINIERLKQIYQQLSCYRGLGMLATVPANHNDA  
NGKRVDAGTRQGSAGASENPSIPEGMSRIERGQSTQKRRREEVPLESSSSKSWKQSK

>Lateolabrax\_macu\_\_UBK24609.1

IPSLEELGFRTTEGLPPAIWHGGESEALDRLNKHLDDKKVWVANFEHPRVNMCSLYASPTGLSPYLRFGCLSCKV  
LYYNLRELYMKLRKRCSPPLSLFGQLLWREFFYTAATNNPNFDRMEGNPICVQIPWDQNPEALAKWAEGRGTGY  
PWIDAIMTQLRQEGWIHHLARHAVACFLTRGDLWISWESGMKVFEELLLDADWSVNAGSMMWLSCSAFFQQFF  
HCYCPVGFGRRTDPSGEYIRRYIPILKDYPNRYIYEPWNAQLVQKAANCVGVGDYPKPMINHAEGSRLNIE  
MKQVYQQLSHYRGLSLLASVPTIQEEAEPPMTDE

>Lates\_calc\_\_XP\_018519383.1

MSPSAVGADDSKSLVRKMLREVLVGREDPEGFFAMCVSLIGHQETRSLFLSLIQPLSTANSSLYSTLTSTSIYKK  
YFSETEDDQLELALALSVLEMKDHQLSSASQESRLQQLQSSSAQLTSVSKPQGSSTQLTDVAENTYSAQTG  
PLGMVCPPKTTQETELQRSTHVDKNNKETKGTCTQTVCSRPSASFQRQEMVVEGDQTVQEGDQSEKPKRSKNR  
RQRRKGGSQQVVGVLPHSPSAQPPVLLWFRDLRLCDNPALIGSLEVGAAPVIVPFIWSPEEEEPGGITVAVGGA  
CKYWLHQALSCFCSSLERIGSHLVFLTANGEGNGVGSSSLRSLKELIKETGARTVLANALYEPWLKERDDTVVS  
ALQKDGVECRMHLHSYCLRDPYSISTEGVGLRGIGSVSHFMSCKQNPQSALGVPLDPPVSLPTPAHWPRGVSL  
DTLGLARMPRRKDGTIDWAANIRKCFWDFSEGAHARLEAFLDHGVYRYEKESGRADAPNTSSLSPYLHFGQL  
SPRWLLWDAKGARCRPPKFQORKLAWRDLAYWQLTLFPDLPWESLRPPYKALRWSSDRGQLKAWQGRGTGYPLV  
DAAMRQLWLTGWMNNYMRHVVASFLIAYLHLPWQEGYRWFQDTLVDADVAIDAMMWQNGGMCGLDHWNFVMHP  
VDAAMTCDPYGSYVRKWCPELADLPDELIHKPWKCPASMLRRAGVVFGQTYPNRIITDLEERRSQSLQDVAVV  
RKEFGQYVDKRTGCDLVPLPRLVSEALGLSHRGGDVVAEGKQFLLPVITRMEFKHQLEDPDADAASNPNYNAV  
LKGYVSRKRDETI AFLNERDFTASVMYEGTQRRERLESQRRMEGLPRPPAPRGRARRTPAKDRFSIVPGGV  
VASLR

>Lates\_calc\_\_XP\_018519856.1

MVVNTIHWFRKGLRLHDNPISLRDSIQGADTLRCIYILDPWFAGSSNVGINRWRFLHLCLEDLDASLRKLNSRL  
FVIRGQPTDVFPRLFKEWHITRLSYEYDSEPFQKERDAAIQKLAKAAVEVMVRISHTLYDLDKIIEELNGGQS  
PLTYKRFQALINHMDAVERLPEVETITSEFIKKCATPISEDHDEKFGVPSLEELGFETEGGLITAVWPGGETEALM  
RLERHLERKAWVANFERPRMNANSLASPTGLSPYLRFGCLSCRLFYFKLTDLYRKVKKNSTPPLSLYGQLLW  
REFFYTATNNPCFDKIEGNPVCVQIPWDRNPEALAKWAEGRGTGFPPWIDAIMTQLRQEGWIHHLARHAVACFL  
TRGDLWISWEEGMKVFEELLLDADWSVNAGSMMWLSCSSSFFQQFFHCYCPVGFGRRTDPNSDYIRRYLPILRG  
FPAKYIYDPWNAPEEVQKAAKCIIGVHYPRPMVNHAEEASRINIERMKQIYQQLSCYRGLGLLATVPANPNNGA  
SGSNVAGVSTGTSQGGPGGFSEDQSIQEGTSRTERGQSAQKRRHEEAPSENSSSKSWRQSK

>Lates\_calc\_\_XP\_018522462.1

MDCPCWYRVTDMAHTCIHWFRKGLRLHDNPALMAALRDCKEYIPVFLVDPYFHTNTRVGINRWRFLIGALKD  
LDCSLRKLNSRLFVVRGKPEDVFPKLFKWKITKLTIEYDTEPYSLSRDEKVTALAKEHNVEVIYKISHTLYD  
IDRTIEENNGKAPLTYNRMQAIVKTLGPPKKPIAPTLEDVKDVMTPCSENHEKEYGIPVLEELSQDTAALGE

ELFPGGEQEALRRLDEHMKRTGWVCNFEKPQTS PNSLS PSTTVLSPYVTFGCLSVRTFWWRLTEVYQGKKHSD  
PPVSLHGQLLWREFFYTASVGI PNFNKMEGNPVCTQVDWD TNPEYLAAWREAQTGF PFIDAIMTQLRQEGWIH  
HLARHAVACFLTRGDLWISWEEGQKVFEELLLDGDWALNAGNWQWLSASAFFHQFFRVYSPIAFGKKT DKNGD  
YIKKYLPLKKFPAQYIYEPWKAPRSIQQAAGCIVGKDY PHPIVQHEVISKKNIQRMKLAYAKRSPAPTESPS  
KKQGEKRAKPSVVDMLKKKTKRT

>Lates\_calc\_\_XP\_018529316.1

MSTSRTVICLLRNDLRLHDNELFHWQRNAEYIVPLYCFDPRHYVGTYNYNLPKTGPFRLRFLLESIRD LRST  
LLNKGSNLVVRGKPEDVVAELIKQLGSVSTVAFHEEVTSEELNVEKRVKDVCTQMKVKVHTCWGSTLYHRDD  
LPFHHSIRLPDVTETFRKAVEARSVRPLFPTPEQLKPLPPGLEEGA IPTAQDLEQTEPLTDPRS AAFPSCSGGE  
SQALARLKHYFWDSDAVATYKETRNLGIGVDYSTKFAPWLAMGCISPRYIYHQNKQYERERTANQSTYWVIFE  
LLWRDYFKFVGAKYGNRLFQLEGLQNKSVPWKKDMKLFNAWKEGQTGVPFVDANMRELALTGFMSNRGRQNV  
SFLTKDXGLDWRMGAEWFEYLLIDYDVCSNYGNWLYSAGIGNDPREN RKFNMIKQGLDYDNNGDYVRQWVPEL  
KEIRGSDVHTPWTLSAALSHAHVSLGETYPSPVVIAPEWSRHVNKKPSGTGPS PRGKKGPSHTPKQHRDRGI  
DFYFSRSKNL

>Lates\_calc\_\_XP\_018532761.1

MLLCIWRGSSSFSCAPRRLRPVIHNRPRPIFFFLTKSFTSETIMSDKKRAKPSAAAGKEPSAKQQKLAPSK  
EEKKERAAGWLQELVKQRSEKKEMKFNKKRLRFISDTEKVKQGSEGVLYWMLRDQRVQDNWALIH AQQLAVK  
ENLPLHICFCLAVPKSELSTLRHYNFLLKGLEEVAKCEKALDIQFHLLHGSPGEVLP GFVSDRNLGAVVTFDS  
PLREPIKWLEDVKKSLSKDIPLIQVDAHNIVPCWVASPKLEYSARTIRGKITNLLPEFLTDFPLVEKHPHTAT  
RTAKAIDWDKTLASLQLDRIVGVPEWAKPGTKGGMATLESFIDVRLKLFATQRNDPNA AALSQ LSPWIRFGHL  
SAQRVALQVQRSGKNAGQSVPSFIEELVVRRELTDNFCFYNNKYDSVEGAYEWAQKTLKD HAKDKREYLYKRE  
QLEKAKTHDKLWNAQYQMVTEGKMHGFLRMYWAKKILEWTSSPEEALSIALYLNDRYELDGDQDPNGFVGCMW  
SICGIHDQGWAERPVGKIRFMNYKGCTRKFDVAQFERKYCPKNL

>Lates\_calc\_\_XP\_018559545.1

MVNSVHWFRLRLHDNPALQEALNGADTVRCVYILDPWFAGAANVGINRWRFLLEALDDLDSSLKKLNSRL  
FVIRGQPTDVFPRLFKEWKVTRLTFEYDPEPYGKERDGA I IKMAQEFGVETIVRNSHTLYNLDR IEMNNNSP  
PLTFKRFQTIVSRLELPRRPLLPVT LQQMDKCHIKIADNHDQLYSIPSLEELGFRTEGLPPAVWRGGESEALD  
RLNKHLDKKVWVANLEHPRVSTCSLYASPTGLSPYLRFGCLSCRVLYYNRLRELYMKLRKRCSPPLSLFGQLLW  
REFFYTAAATNNPNFDRMEGNPICVQIPWDQNPEALAKWAEGRTGFPWIDAIMTQLRQEGWIHHLARHAVACFL  
TRGDLWISWESGMKVFEELLLDADWSVNAGSWMWLSCSAFFQQFFHCYCPVGFGRRTDPSGDYIRRYIPI LKD  
YPNRYIYEPWNA PETVQKAANCVVGVDPKPKMINHAEGSRLNIERMKQVYQQLSHYRGLSLLASVPTIQEEAE  
PPMTDESQTSSGPDSPPRGPIDSEAAGCSTAPDSSTVCASSTCALHPDLEDTPSSNLSQTPCPSSGSQTQPSA  
AVTSTSASHPTSTAAPPSPASTPVQSPLSKSEPPSSSSCLTSLSLTPATTLAQTFH KRKGFTRKVRRSQRQ  
RGQQSCREGERRAKEEEREDTGEEERMEEDVEQNEEKMEETSGKMAGHQQ

>Latimeria\_chalumnae\_XP\_014343736.1\_PREDICTED:

VRGQPADVFPRLFKENNVTRLTFEYDSEFPFGKERDAV I IKVARESGVEVIMRDSHTLYNLNRI IELNGHKPPL  
TYKRFQAIISRMELPRRPVAAVTQQQMETCKTDIGNDHDEQYGVPSLAELGFGQVENDPAIWQGGETEALARLE  
KHLDRKAQVANFERPWINANSLLANPTSLSPYLRFGCLSCR LFYYRLLELYKKIKGNSSPPLSLYGQLLWREF  
FYTAATNNPRFDRMEGNPICVQIPWDSNPKALAKWAEGQTGFPWIDAIMTQLRQEGWIHHLARHSVACFLTRG  
DLWISWECGMKVFEELLLDADFSVNAGSWMWLSCSAFFQQFFHCYCPVGFGRRTDPSGDFVRRYLPKLKNFPS  
KYIYEPWNA PYSVQKAACKIIGVDYPKPIVVHAEASRLNVERMKQIYQQLSHYKGLCLLASVPAYTEDQGSLH  
MESQACSSSAGAAVLQYSKTS LKREMVQEEEEGCRRSKLQFLHIPEKPSKDQ

>Latimeria\_chalumnae\_XP\_014347518.1\_PREDICTED:

MGASSIHWFRKGLRLHDNPALREAVQGASTVRCVYILDPWFAGSSNVGINRWRFL LQCLEDLDASLRKLNSRL  
FVIRGQPANVFPRLFKWKITRLTIEYDSEFPFGKERDAAIKKLASEAGVEVIVKISHTLYDLDKI IELNGGHP  
PLTYKRFQTLVSRMEHPPEMPVEAITASF MGKCI TPVSEDHHEKYGVPSLEELGFDTEGLPSAVWPGGETEALT  
RLERHLERKAWVANFEKPRMNANSLASPTGLSPYLRFGCLSCHLFYFKLTDLYKKVKKNGSPPLSLYGQLLW  
REFFYTAAATNNPQFDKMEGNPICVRI PWDNRNPEALAKWAEGKTGFPWIDAIMTQLRQEGWIHHLARHAVACFL  
TRGDLWISWEEGMKVFEEDLLDADWSVNAGSWMWLSCSSFFQQFFHCYCPVGFGRRTDPNGDYIRRYLPVLRG  
FPAKYIYDPWSAPESVQTAACKIIGVHYPKPVVNHAEASRLNIERMKQIYQQLSRYRGLGLLASVP SNHNGNG  
NGGMMVYSPVEPTLGTNAAHGFSIASGHSNTSILLSYSNDEQPGPSGIQGWSNYGNANGNSSGKRDRPEQDG  
STDDETHMALIVKVQRKSNDRTEELQGINLAS Y

>Leishmania\_inf\_XP\_001463490.1\_putative\_D

MRQVETDSEFLAAAQGLTPPLSDSPVGEVNQSAATAEDGSHGGCMLASKPPWGS PAPPALALPEDAAELATDLA  
QEVGALYTDAGVTSARCWEQAEQEMEADSGRRDDGVEFGDDAERDEQLLASLKG RHVRLQNTPDVVMAPLIIP  
DRNGRVAADAQALLHCRGGESEASALEVAPRITARLLHRHSHLAEQDRLYLG PCTAPEAQLRPPDVMRAAPP S  
SGTQRHGCCVLVVSSTDLRVHDNQLLAFASVCARAAAAEAGSPVPVIGVCVLDYRTFAQPSTVGGFFRQSPQ  
RAQFLLDTVAAALRRKLEDTLHVPLLVR CGRPEEHVPRLA VELGAMDVLMTTQYAPHERRVQALMVRRLRAGTW  
VSREEVSDEAVVAGAVQGASATPVGAQCGSAAEEDDPLIAVVEHASCGVGGQHPYHCGSSLPLHCRAAAAPP  
MVHSVWQSTLVHLDLPTPLTMKEGERWYHDDVTVSTIRPTEPYDKATALLAELPLTWQAAALLPTEDERYG

RAGPSVLRGALPRLEDLGYSAAAARGTDFAFQEVIAATQSSHPDAGEDAALARLQNWLAQGGVTSLRLRYGRERR  
TNTKMYSQKLARVSPYIALGALSPRKYIEVLREFAQENQRDAFVQQQFREGLLRLSRRDYWHWMGLRFGDRLF  
FSYGPHPEHTDDVPWEHRDRKVVQRWCDGLTGIPFADAAMRELVTGTFVAQEGRQALAWLLTRGYQDWRVGA  
EWMERCSLDYDPFVCYGNAYSCGLMLDDFGEPRVNVYLAHQHDQGTGIYVKKWLPQLSKVPPVYIHRPHVLT  
ERMQAMHGVLGKNYPYPLKLWQGAQRSLSAELTAYYPQGIVKGPYAEALRYGSVMQPEEYNAAVSPAYL  
QRQEWATMLPASAFAGIEDSDEMAKHFSLLAAAPRKSAPPAAVVAGGSTLKRVA

>Leishmania\_inf\_XP\_001468129.1\_putative\_D

MKRGRSRSSSTGSAAAEKRSHTVREEVALFLFRRDLRVVDNTGLQALCDEAARRFIPVLPAFFFNPIQCDKKR  
NPYFGDAFFQFFCESLIDLGDGAAQLNGGLVCLRGSDDEDCLQRIRDSGYEVKVLGFNEDYTPFALARDRLRAY  
ADKQGIVCVTGPHDYSLRPLDEVKNSEQPYSVFTPFYNKFTAETHARRVAVPLPVNVSKVQSMVSRPKKCMG  
HHLVDPALVYAHMPQVQDHGGRTGLKRLACVERLKLQYADARDDIAGDRTSHLSPHMKCGTVSTREVWHASVQ  
ALGTGHPFTRQLVWREFYAMLAFTPRLLQGQLNSFIGQQDIVKATQPKQNAPFQPSYDNFKWSWKAEHFEAF  
KEGRTGVPLVDAAVRCLTATGWCHNRCRLVISNFAVKVLGIDWRECERWFATVAVDYDAANNNGGWLWSSGQG  
ADAQPYFRTFNAFRQSERFDPCKFIFQWPELAKVPPSVVHHWEGYCARARGKATATHSRKRSQGQNAEEYP  
TSYPAPIVDIKAATKAVVEEFKKYSKYKEN

>Lepeophtheirus\_sal\_XP\_040563574.1\_cry1-like

MTDQRKSHVCWFRNALRLHDNPALTEALKGSDEESTGFIFPLFIFDGTSTNGTDLIGYNRMSYLLESKDLDEQF  
KKFGGSFIIARGSPIQVLKEIHSKNPIMKITWEQDPENKQKRDNKVRDFCANAKIKAIEKQGHITLFDPHWII  
AANGGIPPTTFTTFSKIVDCIGVPNRPVPNADLSHANFISSNFSFSFDKFPTPEDLNIFPHSTFDDTKKVYMG  
GELKALEDLERRMTHIDHFRKGRYLPNRRSPDILCPPKSLSPDLRFGCLSVRKFYWGIIDANWEFQKAVGLN  
IEINHQIVAPLLWREFFYTMAAKNQYFTEIQRNPMCIPIWTSTTDNKQFADFVKGKTGFPIIDAGLRQLYSQ  
GWIHHVVRNAITCFLTRGDLWISWEEGFKLFFKYLLDAEAVCAGNMMWISNSAFEEVFNCQHCIDPVNFGRR  
HDAHGEYVKRFIPELKSMPLEYIYEPWKAPHDVQVNVGCIIGEHYPSPVVNHKQISKLNTLRMKKLQLEFSHT  
RSNPRPRSEYLHPSNSTEAIKFMSFERNCRTPCSNKS

>Lepeophtheirus\_sal\_XP\_040565695.1\_deoxyribod

MPNSIFWFRDLRLGDNPLVEAAKLGVLCVYIFEDRKQNAADFSELGSGTKAWLHYALDSLNTLGGKLFL  
ARGNPLDVLKDVAQKASSKNVFCNHIYEPMEMEMESHIIEKELSSAGITLRSFNSSLLWEPQNILQQNGKPYK  
IFTHFYKKGCLNYGEPRSPLEPSNLNLLQLNDTLTLEDLQLLSKDSPLNTVNEWNISEKGANERLESFLQNG  
LDNYKIGRDFPSQHHVSRLSPYLRFQGISPNIIWYAARKVGTGPDLDHFSSELGWREFSVYLLHHWPHIPRE  
SFNPNFKGFPWKDDEKALAAWKEGRTGVPIVDAGMRELLQTGYMHNRLRMIVASYLVKNLMIHWHRGEDWFDW  
KLLDADLASNSASWQWVGCGADAAPYFRIFNPILQSEKFDPEGVFIRKYVPELTNVPTKHLFAPWEATDTVM  
KNAGVIMGKTYPRPLVDFFKKSQAQDAFDMNNKG

>Lepeophtheirus\_sal\_XP\_040573653.1\_(6-4) DNA\_p

MTTGWVFRNALRLHDNPLIEAAKSSNPVICFYIFTPAVYNPDYMGMRNLYFLLQSLEDLKNRLKKQYKNGDL  
IILNTSKSCKDVFSQLCKADVLKEVFYEYDSSPHGKGRDTQIQKEIHQVSFKVFHGHTFTKLDPVVAQKGFKN  
PSTMSMMENIMIKEFGKGKGRSGINVPSPDPDEINFDISFLKKIKKRCPELEILEEVPKLKDLSKIFGFLF  
DNVNVTSIEKNNFFHGGETEALERLERKVLNDTEFVCKFKKPETTCITTSASEFKEPSTTGLSPYIALGCLSV  
RQLWHGVDQAYAKRKGFKIDSLATSLYGQLLFREMFYILNEAIGPVFALNDKNNPAISKYVEWDKDKPKLLEA  
WENGQTGYPFIDALMRQMKSTGWMHHLGRHAVSCFLTRGQLYQNWITYGRDVFDRDLVSDYALNTGNWLWLSG  
VATFSMPYFRVYSPCPTEDKKSALNFNAGGNDFIRHWVPELKKFPAKFLTKPWECPKMAQTSCGVIIGKDYPM  
PIVPLKNDNLDFKKSQDNKSSSGPPNKKKKI

>Lepeophtheirus\_sal\_XP\_040573654.1\_deoxyribod

MESPMKKPKLNGDPFATERLEAYPSPMDFKFNEKRVKLLSGSENYSGRGKKPCIVYYMHRDQVRQDNWAFLYA  
QRLALKHKLPLHLVTLTISEKHDPHGMTLRNLTFWLDGLREVSTELKTLNIPHLNINQSLDESPGTSIVQWL  
GMMSDVQALIVDFSPLRQHRKIVRDIIESIKTPDLPLYRVDANVVPVEVTSDKQEYAARTIRSKINKKLDEF  
LTIFFPIIHHPHGVLSETEIHFGNQIGKNIEEDWSTLLNSLLIDHSVGPVDMYKGGSRAGFECLESFVTKRIQ  
RYTDKRNPNEDVLSRLSPWFHNGQISVQRAVLYVKKVANKYSSSFVEESIVRRELSDNFCYYNENYDSVKA  
ADWAQKTLSEHKDKRTHIYSRSKLEKAKTHDDLWNAQNQLVTEGKLHGMYRMWAKKILEWTESPDVALAD  
ALYLDNHAYALDGNANGFVCGMWSICGIHQGWRRSIFGKIRYMNYDGCKRKFNIGSYINRYNPKNKGFFK  
PKLS

>Lepisosteus\_oculatus\_XP\_006643183.1\_PREDICTED:

MVVNSVHWFRKGLRLHDNPALQEALNISDTVRCVYILDPWFASANVGINRWRFLLESLEDLDASLRKLNSRL  
FVVRGQPADVFPRLFKEWNVTHLTFEYDSEPFGERDAAIMKLARESGVETIVQESHTLYSLDRIIELNNNSP  
PLTFKRFQAIVSRLGLPKPLGTVPQQMERCHTPISENHDECYRVPTLEELGFKTHGLSPSIWKGGETEAVR  
RLNKHLEKAWVASFERPKINVYSLIASPTGLSPYLRFGCVSCRIFYYSLEELYKKVRKSSSPPLSLFGQLLW  
REFFYTAATNNPKFDQMEGNPICVQIPWDRNPEALAKWAEGRTPWIDAIMTQLRQEGWIHHLARHAVACFL  
TRGDLWVSWESGMRVFEELLLDADFVSNAGSMMWLSCSAFFQQFFHCYCPVGFGRRTDPSGDYIRRYIPKLKE  
YPNRYIYEPWNAPEIVQKAANCVIGVDYPKPMINHAQASRLNIERMKQIYQQLSHYKGLSLLASVPSVPDDAR  
SPVTDDPHGHSSAPCSRHHSKNTSWRKRRERPSDLESEDKCSRPKVQRPCVTGSRANDKP

>Lepisosteus\_ocu\_XP\_006628580.1

MTHRTIHLFRKGLRLHDNPSTLLGALESSAVLYPVFILDRAFMEEAMARGVLRWRFILQSLQDLQRLAALGSR  
LYVVEGRYDQVLREKVRQWGITQVTFDTEVEPFSTRLLDDIRALGQEMGFSVQSCVAHTLYDVQRI IKANGGE  
APLTYKKFLHVLALLGAPETPARRITREDFRQCRTPTEESEEEKYRVPSLEDLGIVVESEALWVGGETEGLQR  
LEQHMNQNGWIENFTKPTIPNSLLPSTTGLSPYFSLGCLSVRMFYHRLSNIYAQSKNHSPLPPVSLQGQVLWR  
EFFYTVAATPNFTRMAGNPICLQIDWKDQEALDRWKTARTGFPWIDAIMTQLRQEGWIHHLARHAVACFLT  
RGDLWISWEEGMKVFEELLLDADYSVNAGNMMWLSASAFFHQYTRIFCPVRFGRRTDPEGHYLRKYLPLVKNF  
PSQYIYEPWTAPQQVQLEAGCIIGKDYPLPMVNHREVSESNLALMREVRREQEKTAQLTRDTADDPMEVGKKR  
ACQREAETDRSDAFLEKPERAKRFSHAEGEAKALACSWPSETLRLPALGREVM

>Lepisosteus\_ocu\_XP\_006634324.1\_cry\_DASH-1

MSTIRTIICLLRNDLRFHDNELLHWAQGNAEQIVPLYCFDPRHYLGTHCYNFPKTGPFRLRFLLESVKDLRDT  
LKKNGSNLLVKRGKPEENVSDLIKQLGSVTAVAFHEEVTKEEQDVETEVTTRVCAQFKVRVHTCWGSTLYHRED  
LPFNHIAARLPDVTYQFRKAVETQSQVRPTIRMPEQLKPPHNLEEGPIPTPEDLGQPNVSDPRTAFPCIGGE  
TQALARLKHIFYWDTNLVASYKETRNGLIGMDYSTKFAPWLALGCISPRYIYEQIKQYKERTANQSTYWVIFE  
LLWRDYFRFVAVKYGNRIFTVKGLQKQSVSWKKDKVLFDAWKEGKTGVPFVDANMRELALTGFMSNRGRQNV  
SFLTKDLGIDWRMGAEWFEFLLDVYDVCSNYGNWLYSAGIGNDPRENKFNMIKQGLDYDNNGDYVRLWVPEL  
RGLKGGDVHAPWVLSSASLADAEVSLNQTYPPVMVVAPEWSRHTTSKASGGGLSQKGRGPSHTPKQHRDRGI  
DFYFSRNNKKLQ

>Lepisosteus\_ocu\_XP\_006642290.2\_cry-2-like

MDSLTTGFGWKHLPGARPMHRSIHWFRKGLRLHDNPALLASLRDCAELWPVFLDPWFPKNARVSVNRWRFL  
RALQDLGDLGNLRKLGSRLFVVRGSPAIEVFPRLFQWQVTRLTFEVDTEPYARQDAQVGKIAEEHGVIEVIQKVS  
HTLYDTERILVENNGKAPLTYNRLQALLKTLGAPKRPVPPPTAEDMKGVCTPCSERHDEEFGVPTLEELGQDP  
RTAGPELYPGGETEALSRLDRHMQRATWVCGFQKPNTEPNALSPSTTVLSPLYLKFGLSARTFWWRLLTDVYRG  
VRVSKRVLSLHGQYSRAEFSYPSENGLSQAACSSGWLVTSSAAARSVPQVSVRVCVSQGCTGFPFIDAIMTQL  
RSEGWVHHLARHAVACFLTRGDLWISWQEGQKVFEELLLDADWALNAGNWQWLSASAFFHQYRVYSPIAFGK  
KTDKNGDYIRKYLPLVKKFSPSAYIYEPWKAAPRSVQEQAGCIVGKDYPRPIVDHVDVSKKNIQRMKLAYARRAQ  
LGGEQEGTGKGMKRKGQSVADLLTKKQKRNSVEEKMSTLSG

>Lepisosteus\_ocu\_XP\_015207477.1\_cry-1

MVVNTVHWFRLGLRLHDSPALRESLKGASLRVCYIILDPWFAGSSNVGINRWRFLLQCLEDLDASLRKLNSRL  
FVIRGQPADVFPRLFKEWNINRLSFEYDSEFPFGKERDAAIKKLASEADVEVIVRVSHTLTYDLDKI IELNGGQP  
PLTYKRQTLISRMDFLETPAEPIAEVMGKCTTPVSDDHDEKFGVPSLEELGFDTEGLPSAVWPGGETEAL  
RLERHLERKAWVANFERPRMNANSLASPTGLSPYLRFGCLSCRLFYFKLTDLYKKVKKNSSPPLSLYGQLLW  
REFFYTAAATNNPRFDKMEGNPICVQIPWDKNPEALAKWAEGRGTGFPWIDAIMTQLRHGWIHHLARHAVACFL  
TRGDLWVSWEEGMKVFEELLLDADWSVNAGSMMWLSCSSFFQQFFHCYCPVGFGRRTDPNGDYIRRYLPVLRG  
FPAKYIYDPWNAPDSVQKAAKCVIGVHYPKPMVHHAESRLNIERMKQIYQQLSCYRGLGLLASVPSNPNNGSG  
GAGMTGFSSGEGHLSSNAAGTSAGGVEGQAVTVLSYSHGESHRGLQQQGYQIPSGRSSLPYSYSSGDSQAGSNL  
LPQGYTRGSTVVHYTQGDSQQTSSVILQQGRGHLPSVLTTVKRPSPEESTQGIVPKVQRQSSN

>Lepisosteus\_ocu\_XP\_015216926.1\_photolyase

MSGRSPSPQGGAGKGAARKKLQGGEGTGEKKAKKTAPEQGAGWLAEEVAQSRQAGLSVQGFQDKKRMV  
LSKASAMKGGSEGVLYWMSRDQRVQDNWALLYAQQLALEEQPLHVCFCFLVPCFLDATIRQFGFLLRGLLEEVA  
KECSALGLEFHLLRGSAGEVLPQFVQKQGLGAVVTDFAPLRLPLQWVEEVKERLPQDIPLIQVDAHNVVPCWV  
ASDKQEYSAKTIRKKITSKLPDFLKEFPLVAEHPRASKPAKPIDWEQARSSLAVDRSVKEVSWARPAAAGL  
EVLESFIDHRLKDFATQRNNPNGEALSNSPLWHFGQVSAQRVVLEVRRHGRRWPQSVDFVVEEVVVRRELAD  
NFCFYNNKYDRVDGAYEWAQKTLREHAKDRRPYLYSRGELEASRTHDKLWNAAQFMVSEGMHGFRLMYWAK  
KILEWTASPEEALATAIYLNDRYELDGRDPNGYVGCMMWSICGIHQGWKEREIFGKVRYMNYAGCTRKFNVPK  
FEIKYNPKRCDDDEDGNRKRGGD

>Lepisosteus\_ocu\_XP\_015223435.1\_cry-2-like

MQGGHFALVYPFAPQAIRWSADRAHLKAWQGRGTGYPLVDAAAMRQLWLTTGWMNNYMRHVVASFLIAYLHLPWQ  
EGYRWFQDTLVDADVAIDAVMWQNGGMCGLDHWNFVMHPVSAALTCDPYGSFVRKWCPELAALPDELIHKPWQ  
CPASVLRAGVTLGGDYPERIVADLEERRARSLRDVATARQQFAGEYVDRRSGCDLLPLPKLVKEALGGGGG  
GEVVQRGGRFLLPVITRKEFQHQTLEPGAQTNPFDAVLRGYVSRQRDEAAAFLLRERDFTASVMSEGGRRLERQ  
ERDRRVLEGLPPPPAQKSRARRTPRTDFFSVVPGGAPITPS

>Leptinotarsa\_dec\_XP\_023017756.1\_cry-2-like

MSGSTGQSTSGQEKHTVHWFRLGLRLHDNPRLREGLTGAKTFRCVFLDPWFAGSSSVGVNKRWFLLQCLEDL  
DRSLRKLNSRLFVIRGQPADALPKLFKEWGTTLTTFEEDPEPFGKVRDHNITALCRELGITEFFYFSITHVVS  
GLNPPVWQGGSEALTRLERHLERKAWVASFGRPKMTPQSQLPSQTGLSPYLRFGCISTRIFYQLTDLYKKI  
KKAFFPLSLHGQLLWREFFYCAATKNPNFDKMHGNPICVQIPWDKNVEALAKWANGQTGFPWIDAIMTQLRQE  
GWIHHLARHAVACFLTRGDLWISWEEGMKVFEELLLDADWSVNAGMWMWLSCSSFFQQFFHCYCPVKFGRKAD  
PNGDYIRKYLPIILNNMPLQYIHEPWLPADSVQQAACIVGKSYPLPMVNHTNASRINIQRMKQVYQQLANYKV  
METARYPVNTGYSETFQRQPSAVTVGNPDNGQAA

>Leptinotarsa\_dec\_XP\_023024919.1\_photolyase

MASLKPRSSSGKVVLKELTKELFLKNIVESRESQGGTDEFDFNKTRCRVLTDNETVKDKSNGILYWMYRDCRI  
QDNWAMVFAQRLAIKQKVPLFVCF TVKDAHQQYPTMRHFKFLIEGLKLLKKECESLNIGFYLLNSAPKDLAKS  
IVDNNIGGVICDFSPLKHPKKLQEVLLLEHLPDDVPVQVDAHNIVPVWKASDKQEGMAKFLRTKITKQLPEYL  
TGFPPIIRRHKYSGKPNFKNEIESFDSAYSHYTPKWDVPEIKWGDGPGEKAGYSMLLDFILKNLRHYGATSN  
SKDNSSKLSPWINFGQISAQRCALEVKSVD SIYKEQCDKYLEELIVRRELT DNYCFFNSNYDNINGAANWAKE  
TLKLHSDKRTWIYTREQLEKAETHDEMWN SAQLQAHHEGKIHNMYRMWCKKILEWTESPEQAIEYGLWLND  
TFCLDGTDPNGYVGV MWSICGVHDQGWRE REIFGKIRYMDVYSLRRKYNM DAYCARFGRKILGDSKTKAAIIP  
KEPKESKGKNETKKKGKIKRKAT

>Leptomonas\_pyr\_XP\_015655211.1\_putative\_p

MAEVKRNRSRSPSSGTVRCEKKPRTEREEVALFIFRRDLRLVDNTGLQGLLDEAAQRSLRVLPAFFFNPIQCD  
KAQNKYFGDSFFQFFCQSLEDLDGASQLNNHLVCLRGSD EEC LQQVRRGGYDVTVLGYNEDFTPFARARDQLL  
SAYADDHGVTCTVVG RQDYTLRPLGEVVS GAERPYSVFTPF FNKFLCDHASRVAKPIATDVERVQSMLVRQPKK  
YLEEYLVDPTRLCTHNPSIVEKGG RTEGLRRLANIKSMTNYGSVRDDIAHDQTS H LSPYMKCGAVSTRE V WHA  
SVQAVGLAHAFTRQLVWREFYAMLLHHHPRLAQGQLNAFIGQTEIVATTRPQHNAFPQAKYEDFQWSWKPOHF  
DAFREGRGTGVPVLVDAAVRCLTATGWCHNRCRLVISNFAVKVLAI DWRVGERWYATVAVDYDVANNNGGLWSS  
GQGADAPFFRTFNPF RQSERFDPDCEYIYKWPPELKNVPPEVVHSDWDTYCAKLEHQKKGRGSKGSQKGKVKE  
YDTAYPPPLVDIAKARTAVIDKF KSYTPKK

>Leptomonas\_pyr\_XP\_015655956.1\_putative\_m

MLDTVAALRAKLEGE LRVPLLVRCGRPEEHVPRLAAELGATDVFM TTQYAPHERRVQALAMRRLRQGVVVSRE  
DVCGARVTSAAAADPVGDD DALVAVVEHHTSQQHPYGGAAAVVAPPV VHSVWQTTLVHLDLSTPLAAMKEG  
ERWYHDDVTVSTIRPTAPYDSATQRLAELSTTWQHDALLPSQEERAGRSPPSVLRGALPTLEDLGAAADRADL  
AFEEVIATESSHPAAGEEAAARVQDWLAEDGMSLLRYGREHRTNTKMYSQKLARVSPYIAVGALSPRKY YE  
LLRVHTHANMRDGFVQQQFREGVLR LSRRDYWHWMGLRFGDRLFFSYGPHPEQTDEVPDWRHDAKV VQRWCNA  
LTGIPFADAAMRELVTGTFVAHEGRQALAWLLTRGYGQDWRLGAEWLERCSLDYDPFVCYGNFAYSSGLVLDD  
FGEPVRNVHYLAHHHDQTGIYIKWLPQLSKVPPVYIHRPHVLTARMQAIHNVHLGLNYPYPLKLWQGAQRTL  
SAAELPSYQAQGIQRGPGYAEALRYGS AVMPPEELHAAVSPAYLRHRTWASMLPASAF AEGGEAGEEGGEAMA  
VEMGAKSRVAALAGTQAAAMAKSSAGVHGSEKALV

>Leptosomus\_disc\_KFP99119.1

HLAYFVSRIIE LNHGKPP LTYKRFQAIISRMELPKKPVSTVISQQMEICKVDIQENHDDVYGVPSLEELGFPT  
DGLAPAVWQGGETEALARLDKHLERKAWVANYERPRMNAN SLLASPTGLSPYLRFGCLSCRLFYYRLWELYKK  
VKRNSTPPLSLYGQLLWREFFYTAATNNPKFDRMEGNPICIQIPWDRNPEALAKWAEGKTGFPWIDAIMTQLR  
QEGWIHHLARHAVACFLTRGDLWISWESGVRVDEL LLDADFSVNAGSMMWLSCSAFFQQFFHCYCPVGFGRR  
TDPSGDYVKRYLPKLKGFP SRYIYEPWNAPE SVQAAKCIIGVDY PKPMVNHAETSRLNIERMKQIYQQLSRY  
RGLCLLASVPSCVEDLSGPVTD SASGQGCSTSTAMRLSQADQASPKRKHEGAEE LCTEELHKRAKVTDLPAP E  
IPGKS

>Leptosomus\_disc\_XP\_009946273.1

NWAFLYAQRLALKQELPLRICFCLVPKFLDATIRHYSFMLRGLQEVAKECTELNIPFHLLLG YAKDVLPTFVV  
EHGVGGLVTD FCLPLRLPRQWVEDVRERLPEDVPFAQVDAHNIVPCWVASPKQEYSARTIRGKIHAQLPEFLTE  
FPPIVHHPYSPSCPAEPIAWEACYSS LQVDHTVKEVEWATPGTAAGLAVLQSFIAERLKSFGSHRNDPNKAAL  
SNLSPWFHFGQVSTQRAILEVQKHRGKYKESVDTFVEEAVVRRELAENFCYNNENYDSVQ GAYDWAQTTLKLH  
AKDKRPFLYKLQELEQGTTHDPLWNAAQ LQMVREGKMHGFLRMYWAKKILEWTHSPEEALQFAIYLNDRYELD  
GRDPNGYVGCRLWSICGIHDQGWAERAIFGKIRYMN YAGCKRKFDVGQFERRYAPRMLSQ

>Leptosomus\_disc\_XP\_009951143.1

MSHRTIHLFRKGLRLHDNPTLLAALESSEVFYPVYILDRKFMT SVMHIGALRWHFLLQSLEDLQKNLCQLGSC  
LLVIQGEYEPVLRD HVQKWNITQVTLD AEMEPFYKEMEANIRRLGDELGFVLSLVGHSLYDTRKILDLNGGA  
PPLTYKRFLHILSL LGDPEVPVRNLRAEDFQRCRAPDPGLAECYRVPLPVDLKIPLKNLSPWRGGETEGLQRL  
EQHLMDDQGWVASF TKPRTIPNSLLPSTTGLSPYFSMGCLSVRTFFYRLSNIYAQAKHSLPPVSLQGQLLWRE  
FFYTVASATPNFTKMAGNPICLQISWYEDAERLHKWKTAQTGFPWIDAIMTQLRQEGWIHHLARHAVACFLTR  
GDLWISWEEGMKVFEELLLDADYSINAGNMMWLSASAFFHQYTRIFCPVRFGKRTDPEGQYIRKYLPI LKNFP  
SKYIYEPWTASEEEQKQAGCIIGQDY PFPMVNHKEASDHNLQ LMKQVREEQHRTAQLTRDDTDDPMETRVKRD  
HSEENIKGVARVTEHSEIPSGIPCWEPTNGTRGEPEAN

>Leptosomus\_disc\_XP\_009956042.1

VLHWAQSNADFVIPLYCFDPRHYLSTHCYGFPGKTGPHRLRFLLESVKDLRET LKKKGSTLVVRKGKPEDVVRD  
LITQLGSVSAVAFHEEATQEELDVEQGLCQVCSQHGVKIQAFWASTLYHRDDL PFRPIARLPDVYTHFRKAVE  
SEAKVRPTLRMADQLKPLAPGVEEGC IPTMEDLGQKDTVTDPRTAFLCSGGETQALMRLQYYFWDTNLVASYK  
ETRNLGVGMDYSTKFAPWLALGCISPRYIYEQILKYEKERTANESTYWVLFELLWRDYFRFVALKYGRRI FSL  
GGLQSKEVPWKNDLQLFDCWKEGKTGVPFVDANMRELAATGFMSNRGRQNVASFLT KDGLDWRMGAEWFQYL  
LVDYDVCSNYGNWLYSAGIGNDPRDNRKFNVIKQGLDYDGS GDYIRLWLP ELRGIKGAAIHTPWALNSAALSQ  
AGVTLGDTYPQPVVTAPEWSRHVDQRPQGRGPHPRGRRGPAHTPTQHRGTEFYFSRQKDAQ

>Leptosomus\_disc\_XP\_009960183.1

FLLQCLEDLDANLRKLNSRLFVIRGQPADVFPRLFKEWNIAKLSIEYDSEPFGERDAAIKKLASEAGVEVIV  
RISHTLYDLDKIIELNGGQPPLTYKRFQTLISRMEPLEMPVETITPEVMEKCTTPVSDDHDEKYGVPSLEELG  
FDTDGLPSAVWPGGETEALTRLERHLERKAWVANFERPRMNANSLLASPTGLSPYLRFGCLSCRLFYFKLTDL  
YKKVKKNSSPPLSLYGQLLWREFFYTAATNNPRFDKMEGNPICVQIPWDKNPEALAKWAEGRGTGFPWIDA  
MTQLRQEGWIHHLARHAVACFLTRGDLWISWEEGMKVFEELLLDADWSVNAGSWMWLSCSSSFFQQFFHCYCPVGF  
GRRTDPNGDYIRRYLPVLRGFPKAYIYDPWNAPESVQKAACIIIGVNYPKPMVNHAESRLNIERMKQIYQQL  
SRYRGLGLLATVPSNPNGNGGLMGYSSGESISGCGSTGGAQLGTGDGHTVVQPCALGDSHTGASGIQQQGY  
CQASSILHYAHGDNQQSHLLQAGRTALGTGISAGKRPNPEEETQSVGPKVQRQSTN

>Leptotrombidium\_del\_RWS31519.1\_photolyase

MNSPFVRKISSFNLCTRFFTMSNKGRRKANYSDESRLVNIKEECVSDEVSSIHDRSRTNIAESVEHFNFNKK  
RVRILTKSKEIKENCECVVYWMSRDARVQDNWSMLYAQKISLKFVPLRVCFCLVPTFLNATSRQYHFLIEGL  
KEVERECIALNIPFHLLLGQPPQVLTHFVEKHKTGAVIADFSPLRIMKKWINELTENFPNDVPICQVDSHNIV  
PCWVASDKLEYAARTIRKKINDKLPEFLTYFPPVIRSPFQCEICSNWQKAELS LDVVKSDKVNWAIPGTTAG  
LQMLKSFCETRLKGYATLRNNPNYDNLNLSLPWFHFGQISVQRAILEVKKYQNKFNDSVLAFIEEAVVRRELS  
DNFCYYNENYDNLNGAWQWAQDTLKKHETDKREHIYSKEQLENAETFDPLWNASQIQLVKEGKMHGFLRMYWA  
KKILEWTNSPSEALEISIIYLNLDKYNLDGRDPNGYVGCMMWSICGVHDMGWKERPIFGKIRYMNFEQCKRKFNVN  
EFINKYKK

>Limulus\_pol\_XP\_013787452.1\_CPD

MSPKPIKRKQVDEAGTAHKIQKSQPFKETELSSNILKDVEEARRKCAESVSEFNFIKRRARLISSSKDISKNC  
KGIVYWMSRDQVRQDNWALLYAQKVALAVGCPLYVCFCLVPKFLDATIRHYQFILKGLQEVEKECVSLNIGFH  
LLLGEAYKVLPNFIKKNQIGAVVDFSPLRVPLKWVNDVKQMLPSEIVFWQVDAHNIVPCWEASEKLEYGART  
IRRKIHDKLSTYMTFPPVICHHPCLKSQPVWDKAAEASLLVDQSVKEVKWATPGTKEGLKMLNFNCNIRLK  
NFSDSRNDPTKNSLSNLSPIHFGQISVQRCVLTVKQFRNKYSKSVDAIIEEAVVRRELADNFCFFNPKYDQV  
EGAYDWAKTSLKLHAKDKREYIYNKEQFEKGQTHDPLWNAAQFQMVREGKMHGFLRMYWAKKILEWSKSPEEA  
LEIAIYLNLDKYELDGRDPNGYVGCMMWSICGIHDQGAERPVGKIRYMNQYQCKRKFDVDAFIRKYPVKEKA

>Limulus\_pol\_XP\_022247971.1\_cry-2-like

MERNKYRFFFIPLFNFIILLMNSQLVFSNEFYLLLES DNIQEDHFEKDERGNMFWD FGISGFIGRIKTVLLGIF  
SFFGKDMKETS VHWFRKGLRLHDNPALMKTLEKCGNFRPIFILD PWFVKNMHVGPNRWRFLQLSKDLNLSN  
KLHSRLFVIRGKPLEVFPKIFQQWNVKTLTIEVDTEPYAIERDEKVDQLAKRMGVTVKKEVSHTLYDIERLVM  
KNNGSAPHTYQAMLTMLKKIGPPP KPVASLD SLKGCSTPVEENHDEKYNVPDLKELGIHESDCGPNLYSGGET  
EALRIMNEKLSNKS WVKFEKPKTQPN SLEPSTTVLSPYLKFGCLSVRTFYRLLDVN KYTGNCTKPPVSLE  
GQLLWREFFYTVGYATPNFDQMKGNPLCKQIPWSNNEFLEAWTKAQTGF PFIDAIMTQLRQEGWIHHLARHA  
VACFLTRGDLWVSWEHGMKVFEELLDADWSLNAGNWMWLSASAFFHQYFRVYSPVAFGKSMKDNGDYIRKYL  
PVLKKMPSEYIIEPWKAPLKVQQQIGCVIGKDYPKPIVDHDEARKSNLEKMKNKAYKENKTSNEQKTTNKRSS  
ETVSSLLSPKKTKS

>Limulus\_pol\_XP\_022256597.1\_cry-1-like

MSAPQTKNLVHWFRRGLRLHDQPALLEGLAGCTSFRCVFI LDPWFAGSSNVGVNKRWFLLQCLEDLDASLRKL  
NSRLFVIRGQPADVFPRLFKEWNVTHLTFEEDPEPYGRVRDHSIT TMAQELGIKVICRTSHTLYKLEKIEKN  
GGNAPVTYKEFQNI VASMEPPPGPKPPVTAETLGRA FSSISDDHDEKYGVPTLDELGFDTETLKP AVWQGET  
EALARLERHLERKAWIASFGRPKMT PQSLLPSQTGLSPYLRFGCL SARLFYQQLADLYKRIKKANPPLSLHGQ  
LLWREFFYCAATSNPNFDRISNNPICVKIPWDVNPEALAKWANGQTGF PWIDAIMTQLREEGWIIHVARHAVA  
MFSNSGR LVDILGRRHEGI

>Limulus\_pol\_XP\_022257009.1\_LOW\_QUALIT

MFHLSKIQKLF GKVPVLLQLLV LKTYWNNKLWTGGESRALQRLEXRLIVERAAYKDGHYLPNQFNPDLLGPPM  
SMSAALRFGSLXVRKFFWSI HDLYEEIHPNVVPLGFGMGQLMWREYFYTVSVNNLHYDTMTESPICLNIPWQR  
NDEHLRLWELGKTGYPFID AAMRQLRREEWIDHVARNAVACFLTHGDLWISWEDGLNVFLKYLLDADWSVCAG  
NWMWVSSSAFENILQCTYCISPIHYGHRLDPTGEYIRQHVP ELKNMPTKYVFQPWKAPLEVQQQAGCIVGRDY  
PEPLVHHQIVSAKNREYMNRIRDRL LGKPVLP HCGPGSHSETRIFMWLPDKCLDNVHPCNL

>Lingula\_ana\_XP\_013382193.1\_photolyase

MCMLFSLRNYCAFQLKFYVRTRHIHLASIMSGKENTKKRKGNEEGPVSKMKMKVVEDDAEAGPSSQNSAGVKF  
TDTSKDFLELINHAREAKAQSVSAFKFNKKRVRMLSTAKEFPEECDGVIYWMSRDQVRQDNWAMLYAQRLALK  
MEVPLHVVFCLINHPKLEATMRQYGFMLKGLQEVEQECGRLSITFHLLTGYAKEVLPDFVKCNNIGGVVTD FSP  
LRVPKQWVKDVTENLPKNIPLCQVDAHNIVPCWEASDKREYGARTIRNKIQSKLPEYLTEFPPVIRHPYAAKT  
KAEPVDWSAAEASLQIDRTVTEVKWASPGTTAGRLTLET FCKERLKF FNADRNNPNKNVCSNLSPIHFGQVS  
AQRCALVVKQFKSKFKEGGDAFLEESIIRRELSDNFCYYVENYDSIECAYDWAKETLQKHASDKREYVYTCKQ  
LEEGKTHDDLWNAAQ LQMVKEGKMHGFLRMYWAKKILEWTTSP EEALKISIIYLNDRYELDGRDPNGYVGCMMWS  
ICGIHDQGWGERPVFGKIRFMNYQGCCKRKFDVPAFVRKYGGKKH

>Lingula\_ana\_XP\_013384159.1\_cry-1-like

MSSSRTHKTLHWFRKGLRLHDNPALLAACTKDCAEF RPIFILD PWFVKNARVGVNRWRFLQLQALDLDLDDSLKK  
LKSRLFVLKGPHEVFPKIFKEWGITRLT FEVDTEPYARVRDAEIIKLAK EHNVEVIQKISHTLYDTEKVIAR

NGGSAPLTYQRFQTVLSQLGAPPRTAETLTSEHLKGCITPVTADHDQDYGVP TLKDLKVD TADMGEVVFP GGE  
TEALKRMERYLKKSNWICNFEPKPT EPN SLEPSTTVLSPYLKFGCL SARLFWHRLQE IYKQCKKHSQPPVSLH  
GQLLWREFFYTAGLGVANFDRMEGNPVC RQIPWENKPEYIEAWTHARTGYPFIDA IMTQLRQEGWIIHHLARHA  
VACFLTRGDLWVSWEEGQKVFEELLLDADWSLNAGNWQWLSASAFFHQYFRVYSPIAFGKKTD PQGEYIKKYL  
PMLKKFPKEYIIEPWKAPRAMQEKAGCIIIGKDYPRPIVDHGEISKVNIKKMAAAYALNKDQ NATEKGT PKKRK  
SEADANEKSKSKPKKGSSEKITNFLEK

>Lingula\_ana\_XP\_013384752.1\_cry-1

MGKQDKKEGVSIIHWFRHGLRFHDNASLQEALKDVKECYLIFIFDGSVAGTDTAGYNRWRFLLECLEDLDNQLK  
ELGGRLYTFQGDPEIILQKLFDEWGVTKLTFEQDPEPPWQKRDI AVKKLCREKNIECIEKVSHSTLYNPQDILK  
ANGGSPPLTYAMFCEVCKTLPAPER PQPVPSFSGVSLPVANDFSKFELPTLNDFGITPECSEQKKKKT PPYLG  
GESRGLDLLELRMQEKT SYKAGFILPHYVNPDLSGPPLSMSPHLRF GCVSVRRFYTILDTFREYVKDHEQS  
NELLTAQLMWREYFYVMSVNNSNFTKMVNNPICLQIDFNWDHEVVRKWEKGQTGYPWIDACMRQLVQEGWLHQ  
VGRHAVSVFLTRGD AWQHWE MGLQVFFKYLLDADWSVCAGNWMWVSSSAFEKCLDCPKCFHPVRYGQRM DPVG  
DYVRRYVPELSQFPLRYLFHPWRAPLEVQKKAGCIIIGKDY PAPIVNHAEAAAMKNGERMSLVREKYAKLPDI PH  
VKPSNDEEVWRIAWLPRNLTSVPCVSSDKCDALDIDNLDGLSM

>Lingula\_ana\_XP\_013407859.1\_cry\_DASH

MSGTAMKTVICLIRNDLRLHDNELLHWAYSHLQASHVLPLYCFDPRHFAGTYHFGFPKTGAHRLQFLLESVDD  
LRKSLKARGSNLIIRQGKPEDVVP AI IKCLGQGNVIAVGFQEEATQEELDVEAALKKNCGVQIKTFWGSTLYH  
KEDVPFKIQHVPDVYTQFRKAVEGQSSVRKLL EIP EQLKPPPPDLEEGEMPTMQTFGMQGEVKDERSAFFFCG  
GETEALSRLKHYLWDSDSVAKYKETRNGMVGADYSTKFSTWLAHGSISPRKIFWEIKRYEKERTANQSTYWVI  
FELIWRDYFKFVALKYGTRLF FLDGIMGKKIQWKQDPKLFQAWKTGNTGVPYVDANMREMAATGFMSNRGRQN  
VASFLTKDLHLDRMGAEFESCLIDHDVCSNYGNWQYAAGIGNDPREDRKFN MVKQGM DYDPEGEYVRLWVP  
ELSEIKGGNVHTPWALSKALLSKARVNIGETYPHPIVIAKEWAKHVGRQSDSRGRAPSGKGRQRGIDFYFKNP  
SKP

>Lingula\_ana\_XP\_013416713.1\_cry-1

MTSTQKNVIHWFRKGLRLHDNPALVEALEGAVTFRVCYIILDPWFAGSTQVGINKWRFL LQCLEDVDASLRKLN  
SRLFVVRGQPADVF PKLFKEWKTHLSFETDPEPYGKERD ATII SLAQ SAGVSVISRI SHTLHDPKRIIDLNG  
GTPPLTYKRFQTI FAGMEPPPKALD PITPD MVRGTL PVVSE DHDEKYGVPTLDELGF DTEGLAPAEWKGGEQE  
GLARLVRLERKAWVASFEKPKMTPQSLMSNQTGVSPYLRF GCLSVRLFHWKLT ELYRRVKRSDPPVSLFGQ  
LLWREFFYVATNPNPKFDRMVGNPVCIQIPWDRNAIALAKWAEGKTGF PWIDA IMIQLRQEGWIIHHLARHAVA  
CFLTRGNLWISWEEGMKV FDEFLD TDWSMNAGMWWLSCSSFFQ QFFQCYCPVGF GKMADPN GDFVRKYIPA  
LKGFPAKYIYDPWNAPEHVQKMAKCIIGKDYPLPMVNHAEVSHINMERMKQVYQHIFFRISRTGMV

>Lingulodinium\_pol\_QD016286.1\_cry\_DASH

MAAVVCAWLRLNDLRAHDS PVLQGA AALARQ RGLPALPVYVLDPRHFQRTSHGTLKTGPFRALFLLQALRALKR  
RLRGLGSDLLVRIGRPEVVL PPLLP SGSVLLTQQEVTSEELGVDGR LRSALAGGV EWEYRWGSTLFHKEDLPF  
HDDL RNAPDVFTSFKNKVEPELAARVNEVPSSYEGKRKPQSSIRVRPCLPEPAKGS LPLPALDPAELGFEP SW  
ADLPYEEA VA EPTPHEGAALDFCGGEDTALERLKYLLWDS DLLATYFDTRNGMLGGDYSTKLAPWLALGCISP  
RRVFEQVREYEGARVANKSTYWVIFELVWRDFFRFFAAKHGDAIFWRGGVAGRAEGWR RNDKLF DLWARGCTG  
FPLVDANMRELLATGFMSNRGRQNVASFLALDLGLDWRRGADWFESYLV DYDVTANWGNWVHAAGLT TGRVNR  
FNVVRQSKMYDPDGAYLRHWLP ELRRVPAPRIHEPWLLQEAE LQRYGAEAYPQPCLD PARFRETGGGGRRRR

>Lingulodinium\_pol\_QD016287.1\_CPD\_photol

MRADRSNTSELSPYIRFGELSVRTAFWAARRRRERTDQWL FKEEVYKGLHRANATYLR RFLWRDLAYWFLWRF  
PTLPQTSLRPQYEEQVWSGTRAQLRAWQRGSTGFPLVDAAMRQLWALGWMPNYLRHVVAQT LVEYLDVTWKEG  
FRWFDWTLVSDCAINAYMWQNCGHSGPDHWNFMHPVHAAKSCDPEGHYVKRWLPCL AHL PVEYVHCPWEVP  
ARGVRAAAGLLRSAYVARLVEDLDAARRAHAARVLQVRRDHPETISRTGHEWLRLGGG

>Lingulodinium\_pol\_QD016374.1\_CPD\_photol

MPPRKKASAPKGKAAAEDRKDDGSGDVSGGVVDWRRRRRLTPGVPAAGAAMEGKAVLYWMSRDQRVQDNWAL  
LHARDLAKAAGGQLLVAFCLVPRFLEATIRQFDFMLRGLREVETELRELKIPFELL LCEYGSHAKSILGLCEQ  
RGVGAVVCDMSPLRVPKAWTA EVAATLGKAGVSCVQVDAHNVPVWQASSKQETAARTIRSKITLQYGEFLKE  
IPAFEPMAKQEAGKPDWEKAEASLVVDRTVAPVPGIEPGA KAAMQRLHEFCCKRLGMFAEQRNNPNADALS  
LSPYLHFGQISAQRCALAVRAAEEDQSAGAAVAKGCESFLEEAI VRRELSDNFCWYQEKYDSLEGAAGWAQET  
LRVHEQDKREHLYSEEELEAARTHDDLWNAAQLQMVREGKMHGFLRMYWAKKILEWTS GP EEA LR I AIRL NDR  
YELDGRDPNGYVGC MW SICGIHDMGWTERPIFGKIRFMNYAGCKRKF SIPNFVSRYPSSSLGASMPAKVVEEPP  
AKRSKA

>Lingulodinium\_pol\_QD016378.1\_6-4\_photol

MTGVWFRKCLRLHDNAALI QATRES DHVFPFFI LD PWFDRSRV GANRYQFL LDSLSDLDEQLRTKYGSRL LVL  
RGRPESVFQELFEGKGPFR LQALYWEKDSEPYARERDARVEAL AARLDVRTRSFAGHTLLD LDTVVASPGYKP  
PISM RDVLALVTRCGPIAEFPQPEPCVPPLEVQGFEVPSIAEFYDELPTSRGFP GGEREALKRLDATCADVEYV  
CSFEKPKTASTGRPRAPWEPSTTGLSPYFKFGCLSVRTAWSAIAACYRQRAHSQPPQSLHGQLLFREMFYLLG  
ASVPNFDKAVENPMCKQIPWGEDPALLAAWSEGRTGYPFIDALMRQLRTTG YMHHLGRHAVACFLTRGDLWQH

WTRGRDVFDFKLLLDADWAVNNGNWLWLAGVAPFSAPYFRIYDPCPGPKSSLNAEQAGEFVRHFVPELAMPDR  
FIYKPWTAPRAVQERAGCIVGVDYPAPVVDHAAAREANLGRFKAALAAQPGRELPEKFGPRRPGATSGRGQAE  
AQVQGRVGRQPEADADVEMLP SAGAQTCLRRWGKAPDRVLGA  
>Lithobates\_cate\_PIO31814.1  
VLLWAHRNADHIVPLYCFDPRHYLGTHHYNFPKTGPLRLKFLLSVKDLRNTLKKRGSNLLLKRGHPEDEVIED  
LIKQLGPVSAVAFQEEATKEELDVEKSIKQVCTRHGKVKVQSIWGSTLYHRDDLPRHISSLPDVYTQFRKAVE  
TQCKVRPTLQMPQLKSLPAGLEEGSVPTLEDQDPLSDPRTAFPCSGGESQALQRLDYFWDTNLVASYK  
DTRNGLIGMDYSTKFAPWVVFELLWRDYFRFVALKYGRRIFFLREGRTGVPFVDANMRELAMSGFMSNRGRQN  
VASFLTKDLGIDWRMGAEWFEYLLVDYDVCSNYGNWLYSAGIGNDPRENKFNMIKQGLDYGNGDYIRLWVP  
ELQQIKGGDVHTPWALSGSALSANVTLGKTYPLPIVMAPEWSRHINQRPFLQMIYVQTVIELSYGYCLNHNC  
TYPFFSKPELVLFEGRNAGGIGYLV  
>Lithobates\_catesbeianus\_AAP13561.1\_cryptochro  
MEGPAVSSVHWFRKGLRLHDNPALLAALRGARCVRCVYILDPWFAASSSSSGGVNRWRFLQSLDLDSSLRK  
LGSRLFVGRGQPADVFPRLFKEWGVTRLTFFQYYSEPFGERDAAIMKLAKEAGVEVIVESSHTLYDLDKIIE  
NGNSPPLTYKRFQAIIVSRMELPRRPVPSITRQOMEKCAEIKSTHDDTYGVPSLEELGFPRDNPGAAVWPGGE  
TEALARLDRHLERKAWVAHYERPRMNANSLLASPTGLSPYLRFGLCLSCRLFYRLRELYQVKKNSPPLSLF  
GQLLWREFFYTAATNNPKFDQMEGNPICVQIPWDKNPEALAKWTEGKTGFPWIDAIMTQLRQEGWIHHLARHA  
VACFLTRGDLWNSWECGVKVFDELLLDADFSVNAGSWMWLSCSAFFQQFFHCYCPVGFGRRTDPSGDYVRRYL  
PVLKGYPYRYIYEPWNAPESVQKEAKCIVGVDYKPKPVNHAEEASRLNIERMKQTYQQLSRYRGLSPRLCAVDS  
PKRKHEDLDGELCKKARLQCVQEMERAAKDFL  
>Lithobates\_cat\_PIO14260.1\_AB205\_0057  
ELLLDADWALNAGNWLWLSASAFFHQFFRVYSPVAFGKKTDKNGDYIKKYL PFLKKFPAEYIYEPWKAPRSIQ  
ERAGCIIGKDYKPIVHETVSKQNIQRMKAAYARRSGGGEKETEKGSANGQKRKSPSVADLLKKKRS  
>Lithobates\_cat\_PIO30423.1\_AB205\_0053  
MLRFLQCLELDANLRKLNSRLFVIRGQPADVFPRLFKEWKISKLSIEYDSEPFGERDAAIKKLASEAGVE  
VIVRISHTLYDLDKIIE LNNGQPPLTYKRFQTLISKMEPLEMPTETITTEVMDKCTTPVSDDHDEKYGVPSLE  
ELGFDVEGLPSAVWPGGESEALTRLERHLERKAWVANFERPRMNANSLLASTTGLSPYLRFGLCLSCRLFYFKL  
TDLYKKVKKNSSPPLSLYQQLLWREFFYTAATNNPRFDKMEGNPICVQIPWDRNPEALAKWAEGRGTGFPWIDA  
IMTQLRQEGWIHHLARHAVACFLTRGDLWISWEEGMKVFEELLLDADWSVNAGSWMWLSCSSFFQQFFHCYCP  
VGFGRRTPNGDYIR  
>Lithobates\_cat\_PIO38983.1\_AB205\_0120  
MESPLPLPDISGMKRQLLEGEIGAEFFCLVMSTLGEHRTYRHLPHLIHNLTHTQPGLYGRLMIDIHREYFH  
QRPSDLPTYEEEELEIAIALSLEEARSSAGPGCTIQDPVSNSSISFAEAAKKS PVLNSNGDQKPSTNAKCKKVH  
DDLTTVELSKNLSKLRTADHLDLSYTGQPEPEDCVLNC DGMVAFQIQSPITKADKMKRSRRGRKKNSLVPKN  
PVLVKPVVWFRDLRLHDNPALIAALELGAPIIPVFLWSLSEETGQNFTLATGGASKYWLHHLFNLNLSLE  
QSYGSHIVFRVNDSCVDELVLVQETGAGTVLVNAVYEPWLKHRDDLSETLKKRGVTFTRYHSYCLYEPYSV  
STEGVGLRGIGSVSHFMSCCERNSSSPIGDPLEAPTSPLPSCWPDLSLELDRLDLAKMPRRKDGTVI DWAATI  
KKS WDFSEDGAYICLGNFLEDGIKHYDKESGRADKPYTSHISPYLHFGQISPRTVLHEAYFTKKSVPKFLRKL  
AWRDL SYWLLVLPDMHVEPVRPAYKSQRWSSDRSHLRAWQKGMTGYPLVDAAMRELWLTGWMCNYSRHVVAS  
FLVAYLHLHWIHGYRWFQDTLVDADVAINAMMWQNGGMSGLDHWNFVMHPVDAAMTCDPYGSYVRKWCPELAG  
LPDEYIHKPWKCPPSQLRAGIVLGQNYPHRIVVDLEERREQSLRDVVEVRQKHSEYVDKVS GSDMVSPDQL  
LAFTLGCADGDDNDVKSNTCQFLLPVITRKEFKYKTLQPNTKDNPNYNTVLKGYVSRKRDET IAYMNERHFT  
ASTINEGAQMYERRERTARIMEGLPQMRDPKNKSRRTPTSDFPSIVPPAYFHLAN  
>Loa\_loa\_XP\_020307232.1\_photolyase  
MYCRMESPRIQPLNKQNIIVGKYVLLLIRCIQSQSPSFSFASGKANEHGVPLVTYIYQPDHNL AQRKFL  
EGLNCLENNLSRLHAPLLVIKANNQEATKIVLKLSDACEVITDAAYLREDRRLDENLNDKLIMKCRFTKV  
EGNVTIPVTVLC SKPAYNANTIRKVAWHFLDDFLEKWNVTPKIHCKSWKSIVEYNLECTDISSEYTRAVADC  
KIGSVLKGEDAAALQVMDYFIANNLKAYDKERNIPNGKKQSLLSPYMHFGMLNPITIVNEVKQSKAPKSAKDA  
FLEEMVVRRELAHNFVYYYRDTYDTFDCLPEWAKKTMEEHRFDKREYIINYKELEEGRTHDVYWNAAQFELVF  
THKMSGYLRMYWAKKVIWSPDYERAYAFLEIQNDKYELDGRDPNGYCGVMWNFGIHDRAHANRPVFGKIRYM  
CADGLRRKFRNHIDDYVSINRRAGRILELNSYVQSKATKTSEDFDPKRRRTCR TMK  
>Lophium\_my\_KAF2488308.1\_photolyase  
MPPKRKTAPAPYTDVGSAPNKR SRASKPAPKATESNGNDPPSFDHSRPEETSGIVQREFYPAELSNERCAMY  
NSGEIPRLAVLETTLSETRSAKEKTEIGESVWHWFKRDLRLRDNKGLSLAAAKAGGVPLICVFLVSPQDY  
QAHLTSAPRVDFEIRTLEVLKGD LGRDLVPLVETVEKRRRLPGRLL EMAERWGAHVFCNVEYEVDELREE  
SLVKLGLEKGIAFEAVHDDVVVPPGALVTGTGKQYAVYSPWFRSWIKHVHAAELLKVWEGPGKNPSDARTKF  
RTLFDSEMPEAPDNKKLEPEEKKKLERLWPAGEHEAIARLEKFLGEKVGKYSAMRNFP TANGTACVSVHHSVG  
TLASRTSVRMARDANNTKRLDAGNEGIRVWIS EAVWRDFYKHVLANWPYVCMNKPFKY EYTNIEWEYNTEHFE  
AWCAGKTGYPIVDAAMRQLNSTGYMHNRCRMIVASFLAKD LLLDWRMGERYFMEHLIDGDFASNNGGWGFSAS

TGVDPPQPYFRIFNPLLQSEKFDAEGDYIRKWVEELRNVEGKAIHDPYGRGAAGEAKKKGYPKQIVEHKFARER  
ALTRYKAGIGRETA

>Lophium\_myt\_KAF2495633.1\_DNA\_photol

MAIKPRVIYWFRDTLRLHDSPALAAALDLKPECLWPIWCWDPHYVYRARVGPNRWQYLLDCQQDLSDSIARLN  
PKSRLHVLREAPQTLLPKLFKAWKVTHLVFEKDTDAYARSRDEEVMSSAREAGVQVIVKYGKTLWDPDAVVKA  
NGNKPTMTISQLRHAGEKVGDI PRPI PAPKSIPDPGNMPLDFAQTQPAPEPDLSIYRTRKENSYEKLAGPNG  
DFAVPTIEELGIKSATTPHRGGETGALAVLDNI IKNEQYTATFEKPKSAPTAFAFEPQSTTLLSPHLHFGSLSCR  
EFYWRVQDVVDNFKGKASQPPVSLTGQLLFRDMYFAAQAKMGWKFSTVGNHDCRFIPWHLRSKVDGPDGLVT  
GEYNIDSVEAEWFQRWKTGRTGFPWIDAVMRQLKQEGWIHHLARHSVACFLTRGGCYIDWERGAEVFEEWLI  
DHETACNTGNWQWLSCTAFFSQFYRCYSPIAFPQKTDKNGDFVRHFVPELKDFPAKYIYEPWKAPIQDQRTAK  
CIIKGDGTVQTI DELPAYPKPMFDFSTRRDICIGGMKNAYRVGLYGNSPKVVNGSWPSAFDDDAEGTTD GKNI  
SEQDTLEVETHRQIQTD TNSKADSLKPMNKNKRKGTGTLEGFLRPQKAMK

>Lophium\_myt\_KAF2499533.1\_cry\_

MPPTPPPTPRILIYLLRHDRLRLADNPIFHDLRSISRSSAYKTTASLDPPSPPICHSHSPPKSPTSARIQKTYE  
ASGPALAEKLGVTLLPMYVFPANQIEISGFLSEDGSGTSKSKSPYPEARSEVGGFWRTGPHRAKFIAESVWD  
LKGKLERLDCESLVT RVGLMGDVVDNIVSWYSQQRQGEVTGKVVGIMWTGEEGTEEATEERDVRRVAEDEGI  
DFRIWKDEKYYVDDRDQPFTKISDLPNVYTTYRKPLEPLSSRPRPILPTPHRLPPLPDSLPPQQSPFSIPTTL  
ATLKSALLAPLDADPTLGLPSPQWAPKTTTAHPFLGGERAAHERLTHLASSGAMTAYKSTRNGMLGLDFSTK  
LSAYLAYGCLTARQVHWAMVDFEAGTGGDGVGVAGYGRGENEGTAAIRFELLWRDYMRLCARKFGASLFDIDG  
FRGAENTADDGEQPQPPKRWKYLD RSGGLGDDPAKTREALLRFLSGTTGIGLIDAAQRELF LTGYTSNRRARQN  
VASFLASHLGLIDWRVGAEWYESMLIDYDMANNWGNWQYVAGVGNDRPQGRVFNVPVKQALDYDAQGEYVKAWVG  
ELRDVDLGEDEKGHVQVEKLMGLFQAWRLDSVEKERLGLNGVESVEHPLIRIPFSVTKSRGSDGGNSRGRGRG  
GSYRGRGKGQGARRLGEMDKVARAGGAY

>Lottia\_gig\_XP\_009045127.1\_LOTGIDRAFT

MAGKVIICLLRNDLRIHDNEALLWAFKHGSQVLPIYCFDPRHFKGTYHFGFAKTGPHRLKFLIESVQDLRCRL  
KSKGSLIVRTGKPEEVIPELIKSVGPEFVSSLVYTQEV TQEEIDVEAALNKSCGVKIQT FWNSTLFHKDDLS  
FSIKQLPDVFSQFRKRAETEC SVRSVIPTPETFKPLPQGIEEGNIPTCEDLGVENVPQDSRTAF PYSGETSG  
LDRIKYYFWETDKVAKYKETRNGMIGADYSTKFAPWLAHGCLSPRFIYSEIKRYEKERISNQSTYWVIFELLW  
RDYFRFVAMKYGNEIFFLNGIRMHLPWKKDTNAFI AWKEGRTGV PYVDANMRELAATGFMSNRGRQNVASFL  
TKDLKLDWRLGAEFWESMLIDHDVCSNYGNWQYSAGIGNDRQDRKFNMVKQGLDYPNGDYIRLWIPELNQV  
KGGDVHTVWALNSTVLSRANVVL AQTPKPLVIAPEWGRHMGKVGGATRGGGRGCGGQQQPTKRGMDFYFKNT  
QPRQ

>Lottia\_gig\_XP\_009045182.1\_LOTGIDRAFT

MTSRSVHWFRKGLRLHDNPALLAALDKCEVFAVFILDPWFVKNYKVGINRWRFLIESLTDLDNSLRKLNSRL  
YIIRGKPESVFPALFKWKITQLSYEIDTEPYALRRDKAIDILAEELNVKILKHVSHTLYDTNRI IEKNGGKA  
PLTISKQLSIVKQVGNPSKPLDAPTLQHFKDIKIESDEDISENYKVPTLEELGQDPSLCGPVLYPGGETESLK  
RLENSIAKPSWIASFEKPNT EPNSLSPSTTVLSPIYKFGCLSPRLFYWKIQEVYDKVKKHTAPPVSLHGQLLF  
RELFTYTVGYVTPNFDKMVDNP ICTQIPWQNN EYLKAWREGKTGYPFIDAIMTQLRQEGWIHHLARHAVACFL  
TRGDLWCHWEEGQKVFE EYLLDADWSL NAGNMMWLSASSFFYQYFRVYSPVAFGKKTDPNGLYIKKYL PVLKK  
LPSNYIYEPWKAPKSVQEAAGCIIGKDYPKRIVDHDIVRPINIERMHEAYAKHKASKSKTTTDT PFLQAASLT  
GRNRVEKSEGIIST

>Lottia\_gig\_XP\_009051269.1\_LOTGIDRAFT

MNSKNSYLKGTSVLWFRHGLRLKDNPALLAAVKSCNEFYVPVIFDGEVAGTKTAAAYPRMKFLVESLNDLDRQ  
FRALGGRLYCFRGDPVKIFTNLFVEWNVSKLTFEVDPEPIWQERDDKVKGLCERHNV DWEEFHSHTLWNPNEI  
IENNGGHPPLTFDLFKQVSELVGS PARPEPDADFTHVNF GSKSDDDDNKFKIP SCEELGVYCEDEKQKKPYNN  
YIGGETRGRKLLDSRMKVESLAFESGYCMPNQYKPDLTGPPLSLSPHLRF GTVSVREFYWKILDAYAEVYPNQ  
EAPVSVIAMLIWREYFYTMSVNNLHFNTMKDNPVCLNIKWYKNQEHLDRWTNGKTGFPWVDACMNQLRSEGWL  
HHVGRHMVSCFITRGDLWLSWEDGLKVFDKYLIDADWSVCAGNMMWVSSSAFEKMLQCPQCFS PSMYGRMDP  
TGEYIRRYVPEIARFPLHFLFEPWKAPLKVQQKAGCII DKDY PPMVNHQEV SIRNQKLMEEAKTL SRDQASH  
CCPSNKKEVRDFVWLPDHTPAGGHCSGDGLCEGIECL

>Lottia\_gig\_XP\_009060728.1\_LOTGIDRAFT

MGSDKKSKEKVTKKSSKGTSEDVPKDSKEKSPETDFS SKKRKLEEVSTTEKSSSETS PSKKLKTDGDFVSRIA  
AKRTNVCQSVTEFKFNKKRVRVLSQASDAPDENDGVVYWMSRDQRVQDNWAFLYAQRLALKMEVPLHVCFCCLV  
PKFLEATIRHFEFMLKGLEEVEEECRNLDISFHLLIGYAKDVLPEFVGKNKMGSVVTD FSPLRTPMSWVEDVK  
NNLSKDV PFCQVDAHNIVPCWEASPKCEYGARTIRNKINNQLSTYLTEFPPLVQH KYKAKHIAQKVDWKA AIE  
SLEVDRVTVTL PDWCKPGTNGGLETLESFLKDRIKYFNSE RNKPDKEVLSNLSPWFHFGQVSVQRS IIMVKEVK  
SKYKESVEGFLEEAIVRRELADNFCFYNKYDNIEGAYEWARNTLKDHWNDKREYLYTRQQLAESSTHDDLWN  
AAQYQLVTEGKMHGFLRMYWAKKILEWTENPEVALKDSIY LNDKYSMDGRDPNGYVGC MWSICGIHDQGWKER  
PIFGKIRYMNYQGCKRKFDVAAAFVRKYKVKKPLPNIFNKK

>Lottia\_gig\_XP\_009064438.1\_LOTGIDRAFT

MNEQDNVPAKHSIHWFRRLRLHDNPALIEAVKGATTFRVCVYILDPWFASSSNIGVNKWRFLLECLEDLDSSL  
RKLNSRLYVVLGQPVAVFPSLFKKWKITALTFEEETEPHGRNRDNVITSLAH DAGVEVIKKTSH TLYNLQDI I  
QINSGKPPLTFLRFQSLLCVMGPPNGTVNKLTEKLINN CENTVQSDHDEKYGV PDLATLGFD CANLNKIAFKG  
GETEALCRLHRHLERKAWIASFETPKMTPESLMPSQTTLSPYLRFGCLSAREFYQWQLRDLFKKLNRGE EPSLA  
MYGQLLWREFFYLVARDNMKFDQM QGNPICVQIPWDKNSTALAKW TAGMTGYPWIDA IMTQLKKDGIHHLAR  
HAVACFLTRGDLWLSWEEGMKIFDEYLLDADWSINAGMWWLSCSSFFAQFFHCYCPVNFGRVDP SGDFIRH  
YLPILRAYPQEYIFEPWTAPESVQKSAKCIIGKDYPLPMVNHHEVSQNLADRLRQVYHHLTLKVSSKFKKTDR  
Y

>Loxodonta\_africana\_XP\_003412157.1\_cryptocho

MAAAVVTAGAAALVPIPSMDGASSVHWFRKGLRLHDNPALLAAVRGARCVRVCVYILDPWFAASSSVGINRWRF  
LLQSLLEDLDTSLRKLNSRLFVVRGQPADVFPRLFKEWGVTRLTFFEYDSEPF GKERDAAIMKMAKEAGVEVVTE  
NSHTLYDLDR IELNGQKPP LTYKRFQAIISRMELPKKPVGSVTSQQMESCR AEIQENHDETYGVPSLEELGF  
PTEGLGPAVWQGGETEALARLDKHLEKAWVANYERPRMNANSL LASPTGLSPYLRFGCLSCRLFY YRLWELY  
KKVKRNSTPPLSLFGQLLWREFFYTAATNNPRFDRMEGNPICIQIPWDRNPEALAKWAEGKTGF PWIDA IMTQ  
LRQEGWIHHLARHAVACFLTRGDLWVSWESGVRVFE LLLDADFSVNAGSWMWLSCSAFFQQFFHCYCPVGFG  
RRTDPSGDYIRRYLPKLKGFP SRYIYEPWNAPE SIQKAAKCIIGVDYPRPIVNHAE TSRLNIERMKQIYQQLS  
RYRGLCLLASVPSCVEDLSSPVAEPSSSQAGSSNSAGPRPLPSGPTSPKRKLEAAEEPPGEELSKRARVAKLP  
GPELPSKDV

>Loxodonta\_afr\_XP\_003405361.1\_cry-1

MGVNAVHWFRLRLHDNPALKECIQGADTIRCVCVYILDPWFAGSSNVGINRWRFLLQCLEDLDANLRKLNSRL  
FVIRGQPADVFPRLFKEWDITKLSIEYDSEPF GKERDAAIKKLATEAGVEVIVRISHTLYDLDKI IELNGGQ  
PLTYKRFQTLISKMEPLEIPVETITSEVIGKCTTPLSDDHDEKYGVPSLEELGFDTDGLPSAVWPGGETEALT  
RLERHLERKAWVANFERPRMNANSL LASPTGLSPYLRFGCLSCRLFYFKLTDLYKKVKKNSSPPLSLY GQLLW  
REFFYTAATNNPRFDKMEGNPICVQIPWDKNPEALAKWAEGRTGF PWIDA IMTQLRQEGWIHHLARHACFL  
TRGDLWISWEEGMKVFEELLLDADWSINAGSWMWLSCSSFFQQFFHCYCPVGFGRRTPNGDYIRRYLPVLRG  
FPAKYIYDPWNAPEGIQKVAKCLIGVNYPKPMVNHA EASRLNIERMKQIYQQLSRYRGLGLLASVPSNPNGNG  
GLMGYS PGENTPGCNSSGSCSQSGILHYVHGDSLLKQGRSPTGTGVSSGKRPSQDEETQTLGPKVQRQSTN

>Lucifuga\_dent\_\_KAF7647002.1

XRLHDNPALKDSIRGADTLRCIYILDPWFAGSSNVGINRWRFLLQCLEDLDASLRKLNSRLFVIRGQPTDVFP  
RLFKEWKITHLSYEYDSEPF GKERDAAIQKLANEAGVEVMVQISHTLYDLDKI IELNSGHPPLTYKRFQALIN  
HMDAVELPAETITSEDMMKCVIPISEDHDDKFGVLSLEELGFETEGLTTSVWPGGEMEALMRLEHLERKAWV  
ANFERPRMNSNLLASPTGLSPYLRFGCLSCRLFHYKLTDLYRKVNKNSTPPLSLY GQLLWREFFYTTATNNP  
CFDKMDGNPMCQVQIPWDRNPEALAKWAEGRTGF PWIDA IMTQLRQEGWIHHLARHAAACFLTRGDLWISWEEG  
MKVFEELLLDADWSVNAGSWMWLSCSSFFQQFFHCYCPVGFGRRTPNGDYIRRYLPILRGFPAKH IYDPWNA  
PKEVQKMAKCIIGVHYPKPMANHA EASRLNIERMKQIYQQLSCYRGLGLLATVPANPNNNVSGSNAGGVNTRS  
EGFSTQEITCQTDRGQSTQKRRREETTPENS YKTRQOSK

>Lucifuga\_dent\_\_KAF7650071.1

MKLRRKRCSPPLSLFGQLLWREFFYTAATNNPNFDRMEGNPICVQIPWDQNPEALAKWAEGKTGF PWIDA IMTQ  
LRQEGWIHHLARHAVACFLTRGDLWISWESGMKVFEELLLDADWSVNAGSWMWLSCSAFFQQFFHCYCPVGFG  
RRTDPSGDYIRRYIPI LKDPNRYIYEPWNAPE SIQKAASC VGVDPKPKMINHAEGSRLNIERMKQVYQQLS  
HYRGLSLLASVPTIQEEVEPPMTDESQTSSGPDSPPTDPCDSEAPGCSAAPDSSTACRSSVATAPHPDQD GAL  
ASDLSQTACTSSAVTSTSMGHSPATPTHVTEAPVSPSPIPEE IPLSTSKLSSASSPSLTLSLSPGPA AQAQ  
ASSLGPKRKGLPWKLRRSQQRGRQGCTAAREKEDKKRAGEEEKMEEDAEQDVDRMEEETSGESRGNQ

>Lucifuga\_dent\_\_KAF7661351.1

MRVASCVRQGCRNTVCRQILKLVALSKRLILVLSCIKKSVTVQTTMPAEKRKAASSAKGPD AQQKLVKER  
AEGWLQDLMVQQRTTEKKEMKFNKRRLRFISDTQKIKQESKGILYWMSRDHRIQDNCKCRSMRRNLLWKRTCLC  
ISVLGAVVTD FSLLRQPLQWLEEVKKKLSKDVPLIQVDAHNIVPCWVASSKQEYSARTIRGKITNLLPEFLTD  
FPLVEKHPFAATRTAKPVDWAQTLD SLQIDRTVGDVDWAKPGTSAGMAMLESFIDERLKLFGTQRNDPNCAAL  
SQLSPWIRFGHLSAQRLAQVALQVQRDGNACQSIPPFIEELVIRRELTDNFCFYNKKYDRVEGDYEW AQKTLKDH  
AKDERSHIY TREQLEQAKSHDKFWNA AQYQMVTEGKMHGFLRMYWAKKILEWTS SPEEALSISLYLNDRYELD  
GQDPNGFVGCMWSICGIHDQGAERP VFVGKIRFMNYKGCLRKFDVARFERKYCPKNL

>Lucifuga\_dent\_\_KAF7666419.1

MEGNPVCTQVDWDTNPEYLA AWAREAWTGFFPIDA IMTQLMQEGWIHHLARHAVACFLTRGDLWISWEEGQKV F  
EQLLLDGDWALNAGNWQWLSASAFFHQFFRVYSPITFGKKT DKNGDYIKKYLPVLKKFP AQYIYEPWKAPASI  
QQAAGCIVGKDYPCPIVEHEIISKKNIQRMKTAYAKRSADPKESPNKSKGEKCKGPSVVDMLTKKTRM

>Lucifuga\_dent\_\_KAF7669269.1

MSTSRTVVCLLRNDLRVHDNEVFHWAQKNAEYIVPLYCFDPRHYKGTHNYNLPQTGPFRRLRFL LQSVRDLRNT  
LINKGSTLVVRHGKPEDAVAGLIKQLGSVS VVAFHEEVTSEELDVEKKVKDICAQMKVRVQTCWGLTLYHRDD  
LPFNHTARLPD VYTQFRKAVETQSSIRPLFP TPQG LKPLPPELEEGA IPTVEDLQQTG CETDPRS AAFPSCSGGE  
SQALHRLQHYFWD TDAVATYKETRNLISVDCSTKFAPW LAMGCISPRYIYHQIKQYERERTANQSTYWVIFE

LLWRDYFKFVAVKYGSRMFQIKGLQDKSIPWKVDMKLFDAWKEGRTGVPFVDATMRQLAMTGFMSSNRGRQNVASFLTKDLGLDWRLLGAEWFECLLDYDVCSNYGNWLYSAGIGNDPRENKRKNMIKQALEYDSNGDYVRKWLPQLQGVGADVHMPWTLSSAALSHAHVSLGESYPTPIVTAPEWSRHFNNKPSCTGPSARGKKGPSHTPKQHRDKHN

>Lytechinus\_variegatus\_XP\_041453155.1\_cryptochro  
MPKRKHRSSRHSEKPGCLVHWFRKGLRLHDNPSSLKEGLKAASGFRCIYILDPWFAGSCSKGVNRWRFLLECLEDLDSSLRRLNSRLFLIRGQPADVLPRLFKEWKVTQLSFEEDSEPFGRTRDKAISTLAQEAGVKVISQVSHTLYDPQEILALNDNEPPLTYKRQDIISMMGIPVYPVDALEAEDVEGLETFIDPNHEDKYGIPTLEELGFDQEDVPPPMWIGGETEAKQRLDRHLERKAWVANFERPRMSPASLMASPAGLSPYLRFGLSPRTFYWKLTLEYQKVRKTTHTPLSLHGQLLWREFFFTVACNNSMFDRMVDNPICIQIPWDKNTAMLNKWANGETGYPWIDAIMTQLRLEGWIHPLARHAVACFLTRGDLWISWEEGMKVFDEFLLDADWSVNAGNWIWLSCSSFYQQFFHCYCPVKFGRRTDPNGDYVRKYLPFLKNFPSKYIFEPWTAPEVQEAKACIIGKDYPLPIVDHAEASHRNIERMRKVYNNLSRHGGPGILGSPSSKAASAPPKVGKPNVSSKLMPEHQHQHQIQEAPVAQSPNNSILMPRPSKMRFMGMGMGMQMPFSDRTGSGNMGEPSGIGGGGVGAGVSEVSVVPDVRGMEVSGLVNVDVTSHLPGSSSSTLSYQPSLVIQQHQHQHQHPQHQHQHQHQHQHQHMSQQHMPVTITGLSPIDVPGTSGSLLKELEGADWQSHWQFTNQ

>Lytechinus\_var\_XP\_041452601.1  
MPGGACIHWFRHGLRLHDNPALLEGMTLGTEFYPIFIFDNEVAGTSTSGFNRWRFLHDCLADIDEQLKAGGGRLFVFGQDPCHVFKEMFLEWGVRYLTFESDPEPIWTERDCKVKALCKEMNVECIERVSHTLWNPDHII EKNGGTPPITYSMFMECVTEIGHPPRPMPDPIFTKVKMNVLADFEERFSLPSLEALGVRLCEPEQEKVWKGGETRALELFRVRI LHEEEAFKGGYCLPNQYMPDLLGTPKSL SAYLRFGLSVRKFYWKIHD TYSELKNEVSPSHLTAQVIWREYFYTMSVGNIHFNKMKENPICLNIEWKDDEKLEAWTEGRTGYPWIDACMKQLKYEGWIHQVGRHATACFLT RGDWISWEDGLRVFDKYLLDADWSICAGNWMWISSSAFEKFLQCPNCFPCPVRYGRMDPTGEYVRRYLPVLKDMPIRYLFEFPWKAPRAVQERAKCIVGKDYPMPIVEHKSASAANTEQMEKVINRLRDSGIVHCAPSTQKEVRE FVWLPEKMAGGGSCRADQNCEGILGL

>Lytechinus\_var\_XP\_041469260.1  
MAGRMKIIICLLRNDLRYHDNEVLFWAHKNATNVIPLYCFDPRHYKSTYNFGFPKTGPHRLKFLLESVEDLRKTLQSVGSGLVVRSGQPEDVVPQLIQQFGKDEVAVALQEEVTSEELDVEAGLQQSCSKLGVQLKKFWGSTLYHRQDVFPFDPQGVPNVYTEFRKKVENRSHIRPPINMPNSLKGLPQGTEEGDIPTFSSFGVKDPGSDSRSAFPFRGGESTGLARIEDYFWKSDCISQYKETRNLIGSEYSTKFAAWLAHGCVSPRKIHAEVKRYEKERTANQSTYWVIFELIWRDYFKYVAMKFGNKMFAALNGLLDVQKQWTKNKRWFDAWSKGLTGVPFVDANMREVAATGFMSSNRGRQNVASFLAKDLCLDWRLLGAEWFEQMLVDHDTVSNYGNWLYSAGVGNDPRESRKFNMIKQGLDYPDQGDYIRLWIP ELKGIKGGAIHMPWTL SNAELNQAGVSLGETYPSPIVTAPEWSRHTSRPVSDKVKLISVILHI

>Lytechinus\_var\_XP\_041481477.1  
MPYNSTIHWFRKGLRIHDNPALLTAIQGTKVFRPVFILDPNFLESGKVGINRWRFLEALRDLDSFRALGSRLFVVRGNPTTVFPELFKKWNVTRLTDFVDTEPYARQRDQEVIELAKNGVEVVTKVSHTLYDTERTIKANKNPPMTYQRMVGLLSEIGAPALPELAPQISNFTGVTTVPKPDHDSVYGVP SLEDLGLDASGLGPRLYPGGETEGLQRMELHLARKSWVCGFEKPKTSPNSLEPSTTVLSPYLKFGCLSPRKFYAIKEVYAQKTNCTKPPVSLMGQLI WREFFYTVAAGTPNFHQMEENPICLQVPWDDNPEFLAAWKEGRTGYPYIDAIMTQLRNEGWIHHLARHSAACFLT RGDWQSWVKGQEVFDEL LLDADYSLNAANWMLSSSAFFHQYYRVYSPIVFGKKTQNGDYIRKYIPIELRFPAQYIYEPWTAPRSVQEAAGCIIGRDYPRPIVDHSVSVSKRNIGRMKDARACQPGKSAEKRP TDASNKNSNGKVRKITSMLKKK

>Lytechinus\_var\_XP\_041482616.1  
MISFSYQGLKLGYYQQQFCQKQKVVTLYRLFSSHSFCLIMGKDGETSKRSHEGQDDGEKGSVKVKVKEENEAE PQDLQAKVANLRKXGSSILNFKFNKKRVRILSDTMDTADDNQGIVYWMSRDQRVQDNWALLFAQRLAMKQEVPLHVCFCCLVPKFLDGTIRHYNFLLGLEKVESQELHQLDIPFHLLTGYAKDVLPGFVKGHGLGAVVTD FSPLRTPRQWVNDVKEELPKNIAFCQVDAHNVVPCWEASEKLEYGARTIRPKITKHLTTYLTFEPVVCHPFKVKTKAEPIDWEAAYASLDVDQTVKPDWAKPGTSEGKMLDSFTKERLRYFSSARNDPTKNVCSNLSPWIHFGQLSSQRAALIVRLYRSRYSESVASYLEESIVRRELSDNFCFYNDNYDSIEGTNEWAKKTLKDHA KDKREYVYSRDILERA KTHDQLWNSAQKQMVREGKMHGFLRMYWAKKILEWTASPEEALEIAIYLNDRYSLDGRDPNGYVGC MWSICGIHDQGWGERPVFGKIRFMNFKGCKRKFDVDTFINRYKYSL

>Macrostomum\_lig\_PAA82046.1\_BOX15\_Mlig  
SATPMERMQSCITDSNSPNDHWMTL DGPAMSGGVKHAVHWFRRLRLHDNASLLAAARQADNLR CVFLLDCLQLERHQQHRYLAANKWRFLVDCLRDLD ESLRRLGSRLFVVRGQPLEAFRRLPLWGASHLSFEEDCTPLGRDRDSAVTKLAHELGVTVLRGCSQTLYSQQVLMQASGGELPLTFAKFHRLLLTVGSPAPCPSLQDEAATLPPPPPLTPQLHPGPHRGLSNSFSNNKTSSSSNGNTCNAASFIDEDAFNLPTLGELGLDQDEANYQPTPVLIRGETEALARLTRHMERRSWVATYGGKPRYQSQLLMPSGTCLSSHLAFGCLSPKL VYAQLTDLYRKIKGGSSAQPPPLHIYGELLWREYLYLTAHANPNFDRLEGNPMCLPIPWCRDQAAFGAWSTARTGVPWIDAIMTQIRLEGWAHPYCRYSAVAFLTRGHLFQNWEDGAKLFEQLLIDAEWPTNNGLWLWMSGSAFFQA FGCAYSPIAGRKLD PQGDYIRHYLPQLARLPTRYLHEPWLAPPAVQEVAGCIIGRHYPAPMLPDLDEAAESCASRLRAVYAALLTQSGTPTAASAAAAAAAAGGSTLASMQPPPPPPPLTSRPSRPPFSQASSSSSTSSALAPPHLT MATGVQQHQHQHAEDFVLDMLASPTIDDSMA

>Macrostomum\_lig\_PAA84477.1\_BOX15\_Mlig  
QSKFKLEQLPKTKRRLDSANSSAEPEQQPKKKQRLDSAGSSAEPSSSTSTSTPTQPLMEFSYASASVEEFRFAD  
KRVRLLTKKVKDLLPDGRCVIYWMSRDQVRQDNWALIHAQRLALRSRLPLCVAFNLVPKFLDATIRQFDFLLR  
GLEHVETECRRLLDIDFRLLTGQPVDNLPRMVRDLASAAALVADFSPLRVPLNWANSVAAKLPTGVPMYQVDAHN  
IVPVWLASDKLEYAARTIRPKIHRYLGEYLTEFPRIERHPYRLPEADRAKPVNWKAARDSLEVNMSVLPVKWA  
EPGPVGASRTLAEFLQRRRLRFATGRNDPNVAALSNLSPWLHFGQISAQRCAFEAKKFRPSHKESVDAFIEES  
VVRRELADNFCLHNSNYDSLEGAYDWARETLQRHSRDARPYLYTRQELEEGRTHDRLWNAAQLQMVREAKMHG  
YLRMYWAKKILEWTESPAEALSISIYLNDKYNLDGRDPNGYVGCWWSICGVHDQGWGERAVFGKIRYMNYDGC  
KRKFDVEKFSTLYCGAGPAAGSSRPSTSKAGDKKQQSTLLKYLKSKPKNKKR  
>Malus\_dom\_bluelightPb\_XP\_008359419.2  
MDANRQIPENPESKSPPEEQNPLAIVPSAAGLSPFATASLSLSLSTILPTHFFQQPKVSTLFSSQPTKVKVPTQ  
ASSLAHLSLSTTANVTTPPKLSFKSTIAANPLQSPLSLGP RRPLDPSNGAAIRRASIVWFRNDLRVHDNECLNS  
ANNESVSVLPVYCFDPRDYGKSSSGFDKTPYRATFLVESVADLRKNLQARGSDLVVRIGKPETVLVELAKAI  
GADAIYAHREVS RDEVKEEEEKIEAMKEENVEVKYFWGSTLYHAEDLPFKLEDMP TKYGDFREKVKGLEVRKT  
IEALDQMKGLPSRGDVEPGDVPTLMDLGLNPSATTSQDGRPAAIASVVGGETEALERLKKYAAECQAQPPKAS  
KDGGKHSIYGANFSCKVSPWLVLGCLSPRSMFDELKKTSSRTISASSNRNDDGCSGMNWL MFELLWRDFFRFV  
TCSSTKKQLNAAPATACTGALA  
>Malus\_dom\_RXH69018.1\_DVH24\_0313  
MSSGSSSLMWFRKGLRIHDNPAL EYASKGSDFLYPV FVIDPHYMKPDPDAFSPGSSKAGLNRI RFLLESLSDL  
DSNLKKLGSRLLVLKGEPSEVLNRCLKEWDVKRLCFEYDTEPYQALDVKVKG YASAAGIEVFSPVSHTLFNP  
ADIIRNGGRPPLTYQS FVKLVGDPSWASSPLSITLSSLPPIGSFGRCEISEVPTVEELGYEKTQQDEHSPFK  
GGESEALKKLRESIEKKEWVANFEKPKGDPSAFLTPATTVLSPYLKFGCLSSRYFYICLQDLYKNVKSHTSPP  
VSLAGQLLWRDFFYTVAFGTPNFDRMRGNKICKQIPWNDDDELLQAWREARTGFPWIDA IMIQLRKWGMHHL  
ARHSVACFLTRGDLFVHWEKGRDVFERLLIDSDWAINNGNWLWLS CSSFFYQYNRIYSPTSFGKKYDPNGDYI  
RHFLPVLKEMPKEYIYEPWTAPESI QKKAKCIIGRDYPKPVVAHDSASKECKRRMAEAYALNQKLTGLVSEED  
LRNLRRKLEEDEKPEVKNK RQRKLIG  
>Malus\_dom\_RXH73989.1\_DVH24\_0168  
MSGGGCSVWFRDLRVEDNPALAAAVRAGGVVCVFIWAPDEEGPYYPGRVSRWWLKHSLAHL DSSLKSLGAS  
LITKRSTDSVSSLLEV VVSTGATQLFFNHLYDPI SLVRDHRAKEVLTAQGI AVR SFNADLLYEPWDVIDVHGR  
PFTTFDAFWGRCLSMYPDPDAPLLPPKRIISGDASRSPS DTLVFEDESEKGSNALLARAWSPGWSNADKALT  
FINGPLLDYSNNRRKADGATTSLSPHLHFGFEVSVRKAFHLARMKQV VWANEGNKAGEESVNLFLKSIGLREY  
SRYISFNHPYSHERPLLGHLKFFPWVLDQNYFKAWRQGR TGYP LVDAGMRELWATGWLHDRI RVVVSFFVKV  
LQLPWRWGMKYFWDTL DADLES DALGWQYISGTL PDGREFDRIDNPQFEGYKFDPNGEYVRKWLP ELARLPT  
EWIHHPNAPESVLQAAGIELGSNYPLPIVGIDAAKTRLQEALSEMWQHEAASRAAVENGTEEGLGDSSSESV  
IAFSQDIQMEENNEPARNNPPGTRKYEDQMVPSITTS LVR AEEEEETSLELQNLTEETRAEVP TDLIVNQEP  
DILNQGFFQTIHNNALPQSNAAIGLQHAVEDSTAESSSSSTRRERDGGVVPVWSPSSSSSYSEQFGSEDNGIGTS  
SYLQRHPQSHQIMNWRRLSQTG  
>Malus\_dom\_XP\_008369510.2\_photolyase  
MATNSATATVQPCRIRILKEGSKLADQISGPVVYWMFRDQVRDNWALIHAIEHARKASVPVAVAFNLFDQFL  
GAKARQLGFMLRGLQQLQSDLEETHQIPFFLFRGKA EETIPNFVGECEGASLLVTD FSPLREVQCKQEI CKAV  
SDFVTIHEVDANNVPIWAASEKLEYSARTIRSKINIKLPEYLVEFPKLQPP LTKWGVNRLIDWDGLIDEVL  
RKGAEVPEIDWCESGEKAAMEVLMGSKNGFLT KRLKGYSSDRNNPLKPGGLSGLSPYLHFGQLSAQRCALEAR  
SRRKLCPEAVDAFLEELIVRRELADNF CFYQPHYDSLQGAWEWARKTLADHASDKREHIYTKEQLENAQTADP  
LWNASQLEMVYYGKMHGFM RMYWAKKILEWTRGPEEAL EISIYLN NKYEIDGRDPNGYVGCWWSISGVHDQGW  
KERPIFGKIRYMNYAGCKRKFDVDGYISYVKRMLVETKKRKADSLLSRKAKEHCT  
>Malus\_dom\_XP\_028947742.1\_cry-1-like  
MSGNKTIVWFRDLRIEDNPALAAAARDG SVFPVYI WCPKEEQFY PGRVSRWWLQSLAHL DQSLKSLGAEL  
VLIKTQSTLAALIECIQAIGATKVVFNHLYDPVSLVGDHNIKGLVELGISVQSFNADLLYEPWEVYAGKGQA  
YTTFEVYWDKCLHIQRELVT RLPPWK LISATVIGTVAKCSLEELGLENET EKSSNALLRRAWSPGWSNADKAL  
SEFFELHLLDYSNNRMKV GQNSTSLLSPYLHFGELSIRKVFQ SARMKQILWAKEGNSTGEESVTLFLRAIGLR  
EYSRYLCFNFPF THERPLLSNLKFFPWQADQANFKAWRQGR TGYP LVDAGMRELWATGWIHNRI RVIVSSFSV  
KVLLLPWRWGMKYFWDTL DADLES DILGWQYISGSLPDGHELERLDSPEVQGSKFDP EGEYVRHWLP ELSRL  
PTEWIHPWDADFSVLKVS GVEFGFNYPKPIIEIDLARERL TSAIFKMWEMEA AAKAASSNGTDEVVVDNSIS  
EDLPIPKVILKKTSPCPTYSSNDQKVPTCQNSKNNQFIRKRSKFMQDESPLDPNPHNPNEAGPSRTNEDTSST  
AESSISKKQTTSRNSFSVPQSCSSSEG NPFGCESSEM KQSWQE QSDMEQSSSKNGTIR DANLGM YLAGLFGG  
REGMTDDSI  
>Malus\_dom\_XP\_028949158.1\_cry\_DASH,  
QTLVCVIVSVREVISALPLSPSSRLSLISPFDSPLIYSIH CYRQTMAL THCSFVVKFFNVSSASLSLLWPPNL  
HVSNP TLCTRVSNP TAQNFLPLEL KTRQWQ MAYPHPWLAPHCLKKFIIRPFFPNPKPTISTERLNLFRPMSSS  
SSSKPESPAAVSQVPGLDPVEMERVADQTLQRY SASSSAKRNGRGVAVVWFRNDLRLLDNEALYKAWVSSQEV

LAVYCVDPRIFGSTHYFGFPKTGALRAQFLIECLADLKKNLMKRGLNLLIQHGKPEEILPDLAKAFGAHTVYA  
QKETCSEELNVERLVSKGLQRVALPSSSVQSSKPGSVNNPKLQLIWGTTMYHIDDLPFDTSSLPDVTQFRKS  
VEAKCTVRGCIKIPASLGPPPSVEDWGCVPSLDQFGLQSSIVSKGMKFVGGESAALGRVHEYFWKKDLVKIYK  
HTRNGMLGPDYSTKFSPLASGSLSPRFIYEEVKRYEKEREANDSTYWVLFELIWRDYFRFLSAKCGNSLFHL  
GGPRKVEHRWSQEKTLFESWRDGHGTGYPLIDANMKELSTTGFMNSNRGRQIVCSFLVRDMGIDWRMGAEWFETC  
LLDYDPCSNYGNWTYAGVGNDPREDRYFSIPKQAQNYDPDGEYVAYWLPQLRSLPKDRNFPGMAYIKPVVP  
LKFGNASSRHQNQDRGSAAGGANFGGRQPRGQRR

>Manis\_java\_\_XP\_017520962.1

MGVNAVHWFRKGLRLHDNPALKECIQGADTIRCXYILDPWFAGSSNVGINRWRFLQCLELDANLRKLNSRL  
FVIRGQPADVFPRLFKEWNISKLSIEYDSEFPFGKERDAAIKKLATEAGVEVIVRISHTLYDLDKIELNGGQP  
PLTYKRFQTLISKMEPLEIPVETITSEVIENCTTPLSDDHDEKYGVPSLEELGFDTDGLPSAVWPGGETEALT  
RLERHLERKAWVANFERPRMNANSLLASPTGLSPYLRFGCLSCRLFYFKLTDLYKKVKKNSSPPLSLYGQLLW  
REFFFYTAATNNPRFDKMEGNPICVQIPWDKNPEALAKWAEGRGTGFPWIDAIMTQLRQEGWIHHLARHAVACFL  
TRGDLWISWEEGMKVFEELLLDADWSINAGSWMWLSCSSFFQQFFHCYCPVGFGRRTPNGDYIRRYLPVLRG  
FPAKYIYDPWNAPEGIQKVAKCLIGVNYPKPMVNHAEEASRLNIERMKQIYQQLSRYRGLGLLASVPSNPNGNG  
GLMGYSPGENIPGCSSSGSCSQGSGILHYAPGDSQQTHLLKQGRSSMGTGLSSGKRPSQEEDTQSIGPKVQRQ  
STN

>Manis\_java\_\_XP\_017522607.1

MAAAVVTAATAAPADGADGASSVHWFRKGLRLHDNPALLAAVRGARCVRVCXYILDPWFAASSSVGINRWRFL  
LLQSLEDLDTSLRKLNSRLFVVRGQPADVFPRLFKEWGVTRLTFEYDSEFPFGKERDAAIMKMAKEAGVEVVTE  
NSHTLYDLDRILIELNGQKPPPLTYKRFQAIISRMELPKKPVGSMTSQQMESCRTETIENHDDTYGVPSLEELGF  
PTEGLGPTVWQGGETEALARDKHLEKAWVASIERPRMNANSLLASPTGLSPYLRFGCLSCRLFYRRLWDL  
KKVKRNSTPPLSLFGQLLWREFFFYTAATNNPRFDRMEGNPICIQIPWDCNPEALAKWAEKGTGFPWIDAIMTQ  
LRQEGWIHHLARHAVACFLTRGDLWVSWESGVRVDFELLLDADFSVNAGSWMWLSCSAFFQQFFHCYCPVGFG  
RRTPDPSGDYIRRYLPRLKGFPSRYIYEPWNAPEIQKAAKCIIGVDYPRPIVNHAEATSRLNIERMKQIYQQLS  
RYRGLCLLASVPSCVEELSNPVAEPSSQTGSMSSAGPRPSGPASPKRKLEAAEDPPGEEFSKRARVVELPTK  
ELPSRDV

>Manis\_pent\_\_XP\_036747204.1

MGVNAVHWFRKGLRLHDNPALKECIQGADTIRCXYILDPWFAGSSNVGINRWRFLQCLELDANLRKLNSRL  
FVIRGQPADVFPRLFKEWNISKLSIEYDSEFPFGKERDAAIKKLATEAGVEVIVRISHTLYDLDKIELNGGQP  
PLTYKRFQTLISKMEPLEIPVETITSEVIEKCTTPLSDDHDEKYGVPSLEELGFDTDGLPSAVWPGGETEALT  
RLERHLERKAWVANFERPRMNANSLLASPTGLSPYLRFGCLSCRLFYFKLTDLYKKVKKNSSPPLSLYGQLLW  
REFFFYTAATNNPRFDKMEGNPICVQIPWDKNPEALAKWAEGRGTGFPWIDAIMTQLRQEGWIHHLARHAVACFL  
TRGDLWISWEEGMKVFEELLLDADWSINAGSWMWLSCSSFFQQFFHCYCPVGFGRRTPNGDYIRRYLPVLRG  
FPAKYIYDPWNAPEGIQKVAKCLIGVNYPKPMVNHAEEASRLNIERMKQIYQQLSRYRGLGLLASVPSNPNGNG  
GLMGYSPGENIPGCSSSGSCSQGSGILHYAPGDSQQTHLLKQGRSSMGTGLCSGKRPSQEEDTQSIGPKVQRQ  
STD

>Manis\_pent\_\_XP\_036747632.1

MAAAVVTAATAAPADGADGASSVHWFRKGLRLHDNPALLAAVRGARCVRVCXYILDPWFAASSSVGINRWRFL  
LLQSLEDLDTSLRKLNSRLFVVRGQPADVFPRLFKEWGVTRLTFEYDSEFPFGKERDAAIMKMAKEAGVEVVTE  
NSHTLYDLDRILIELNGQKPPPLTYKRFQAIISRMELPKKPMGSVTSQQQMESCRTETIENHDDAYGVPSLEELGF  
PTEVLGPTVWQGGETEALARDKHLEKAWVASIERPRMNANSLLASPTGLSPYLRFGCLSCRLFYRRLWDL  
KKVKRNSTPPLSLFGQLLWREFFFYTAATNNPRFDRMEGNPICIQIPWDRNPEALAKWAEKGTGFPWIDAIMTQ  
LRQEGWIHHLARHAVACFLTRGDLWVSWESGVRVDFELLLDADFSVNAGSWMWLSCSAFFQQFFHCYCPVGFG  
RRTPDPSGDYIRRYLPRLKGFPSRYIYEPWNAPEIQKAAKCIIGVDYPRPIVNHAEATSRLNIERMKQIYQQLS  
RYRGLCLLASVPSCVEDLSNPVAEPSSQTGSMSSAGPRPLPSGPASPKRKLEAAEDPPGEEFSKRARVVELP  
TQELPSRDV

>Marchantia\_pol\_OAE26548.1\_AXG93\_3817

MAARTIVWFRRDLRVEDNPALVAAARAGIVIPVFIWSPEEDGQFHPGRVSRWWLKQSLIHLDASLKSLSGSPLI  
MRKSPDTLTIVLLDIVQVGATQVFYNHLYDPVSLVRDHRVKQGLSIHNI PVHTFNGLDLYEPWEVYDDEGQAF  
TTFDDEFWDKCMNMPFEPEAPLLSPRRLVGLPPGRISAGRIDDGLENEYERSSNALLGRAWAPGWSSANKALE  
VFMKGPLHDYATHRIKADNANTSQLSPHLHFGEVSVRKIFHEARTKQILWARENSYVGEQSVGMFLRAIGFRE  
YSRYLSFNFPFTHERSLLANLKSFPWRIDENSFKSWRQGRGTGYPLVDAGMRELWATGWLHNRI RVVSSFCVK  
FLQLPWRWGMKYFDWDTLLDADLECDVLGWQYISGSLPDGHELDREMPQIEGYKFDPEGEYVRRWLPELSRLP  
TEWIIHHPWDAPANVLRAGVELGSNYPRPIVDISSARDQLQQSLAEMWEREAASKAALANGSEEGLGETVETP  
GSCGPGVKMDVHRVIRSSRAACSTASSRRDQLVPCMTEDHKLAAASIMNWNQSPVDEEDEDVQPAFVPSQT  
GGLLDRPSEVRAEVIAHPPSDSSMAEAVHVDNELNSTAESSAAVGRRSEESRGEVPVWPHSSSSRPQRPHLEG  
LVPVVPVRRATLNRRLHSMQMVNLEARTSHKTSSLSA

>Marchantia\_pol\_PTQ29033.1\_MARPO\_0149

MVTVSCRFLLTLCGSLATSPASLRRSAVDFSSAVEFPQGVCADFRCHLRGRSMSSTPKRKARVLQPSIKSAL  
AGTKKEIEELEPAVKKLHQDVKKVAKSEGELDIVNVRSEFKVVEEVHKSRRVRLKEGDGTRKGPILYWMSRDQ  
RSRDNWALLYAVQEAKKRGVSVAVVFNLDVNFDAKARHFGFMLRGLRVVEKNLQAVEIPFFLFRGKAQETIP  
AFAEECGASVVVMDFSPMRIGRVWREELCANSGPSVAVHEVDAHNVPVWEASPKLEYGARTIRTKIHKLLPE  
YLTDFPILKNSGQQTSTPPPPVKWDELIDDLVSIGAEVPEVDWCVPGEDAAMEHLLGSKNGFLTAKRLAKYEF  
RNDPTKTSSLSNISPYLHYGQIAPQRAALECRNHRKQHLKMADSFFEEELVVRRELSNFICYQPNYDNVKGAW  
DWAQKSLREHASDKREFVYTQEQLEKKGKTHETLWNAAQLEMVHYGKMHGFMRMWAKKILEWTESPEEALRIA  
IYLNDKYELDGRDPNGYVGCWWSICGIHDQGWKERPVFGKIRYMNLAGCKRKFNVDGYVAYVDRVLVSLAKKKA  
KDSVKIAAAHKMS

>Marchantia\_pol\_PTQ32765.1\_MARPO\_0095

MPLVLKCTTILPPFAVSRIRIRTSVSRARHLGCGVESRTMGQHSLMWFRKGLRLHDNPALHKACEDASHVFPV  
FVLDPFFLAPDPTAPSPGSRTAGVNRIHFLLQSLQDLDSLSKSRGSQLFLVHGNPTEVIPELLEKWSIKRLCF  
EHDTEPYAQDRDKRIKEICEERGIELHSPVSHTLNFPAETILKNGGKPLTYQAFCRTLGKPPKPVGDAPAAI  
PEPSKDLMDVDVPIPSLQDLGYADLNEEFTPFGGGETEGLRRLDKMLADKKWVAEFEKPKGNPTAFIKPATT  
CLSPYLKFGCVSVRLFYARLLTVYSEMKKHSHPPVSLEGQLLWREFFYTGVGYGTINYDRMVGNPICRQIPWKD  
DEVLLSRWRDGTGFPWIDAAMIQLRKWGMHHLARHAVACFLTRGDLFVYWEKGRDVFDRLLVDSWDAINNG  
NWMWLSASAFFAQYHRIYSPITFAKKHDPEGNYIKHFIPVLKDMPKAYIYEPWTAPLSVQKAANCIIGKDYPK  
PVVDHAIANKKCRDRMGAAAFALNKAAGSGQPTQEQVNALNEKLTAKLDESDASIAAESSDGEPPSPKPKPK  
SKRQRTLTEYKKK

>Marchantia\_pol\_PTQ48384.1

MANFDDLELILDSNVERASGGGVAEHFEFEKPLQSNCGSSHLRERVNTAETGSGDGEEIIVVASRDDLDSSKP  
FMVPGAASLTAMAGSLLSLHVSPPVHRLGFAPSKKVLKTDTSAKKTINSSPVVGASQMDVSMGSSITKTVKK  
SVGSISPFDPDYQRLHGSQFGEPRNPAGLRKATIVWFRNDLRVHDNEALVQASNDSMSIVPVYCFDPRDYGKSS  
SGFDKTGPYRAKFLLECVSNLRDNLRRERSELIVRIGRPEEVLVSLAKTVGADALYAHLEVAHEEMNAEEKVS  
AALKEEGVESKYFWGSTLFHVDDLFPKLEDMPSNYGGFRDNVQGVVVRATIEAPKHLKGLPVGGSVKAGEIPS  
LQELGLNPSAINRPETPVSGARPGFSGNEPSDGELALNLALS LAKDFPQEEDEDEKHTAYGGALLIGGENEAL  
QRLRSFVVEASSLSETKSRTADKAGESLYGANFCKISPWLAMGCLSPRRMFEDLHQSNKKVAPASAAKCGVT  
DDNGLNLWLFELLWRDFFRFITKKFGAGKKSSTPATACTGALSPA

>Marchantia\_pol\_PTQ49876.1\_MARPO\_0002

MLSSRGSKFLSSGSQLLASGSMQKSGASARPMHVMASKDGGSGQKKGRQGTGTSMWFRNDLRVSDNEALLRAW  
QTSSAVLPVYCLDPRVFSTTHVFQFPKTGELRAQFILESVADLRKNLQRRGLDLVIRVGHPEEIVPSLAEAVG  
AHTVFGHKETCSEETTVEGRKGR LAKVNVSEVPKGKSVRHPQLDLVWGGTLYHIDDLFPSPNQLPDVYTQFR  
KACETNSRIRPACKMPHQMGPLPDSVEKIGGCGPLPTLADVGLTPREQSPSGVMHFAGGETAALARLQDYFWV  
KDKVRAYKETRNGMLGADYSTKFSPWLAHGCITPTIGEELKKYEGERVANQSTYWVLFELLWRDYFRFLSIK  
YGNSIFHLGGPRNVKGKSWGQDKLLFEAWRDGKTGYPLIDANMKELAQTGFMNSNRGRQIVCSFLVRDMGLDWR  
LGAEFWETCLLDYDPCSNYGNWTYAGAGVGNDRPREDRYFSIPKQAQTYDADGEYVAHWLPQLRHLPKTARHFPK  
DAYLRPIVPLRHGQAPRNQPNNGRQPAFRN

>Marine\_Gro\_OIR17544.1\_BD935\_0255

MNVGIIWFRNALRLNDNRVLVECLNSTNSQTILPLYILDKSDLEQNNNENKIKFLYESLIDL DANFKAKFGSN  
LIVLNGKSKDIFRKL DSDLLDLSEIFTDYSNKPDDIENENNLKSILAENASVKLHLISKVNSLTNVQEVVSQ  
ENFKPPKTMKDMEKLFNSLYPKDEGDFYSIDKPLEIPENSKPIYENSSEI IKDYLFDVKKELSLLEKDSKSYF  
KGGESEAIIRLERKVSSEEEYIRNFRKPRITSTNKPENPLEPETTGLSPYLSFGCLSPRLLWKETEKCYRNGE  
HTQPPESMHGQLMFREMFYILSRAVENWSDTNNSMCKKIEWGDFDKSKMELWEKGQTGFPIYDAMMRQLDAT  
GWMHHLGRHAVSCFLTRGQLWQHWEQGRDVFDRKLVDADWALNNGNWLWLSGVAPFSPMPYFRLYNPCPDGKSS  
LNVEAKNAEFVRYWVPELKDYPISKYIFEPHLAPTPIQENARCIIGKDYPEPMVDRKVVAKENLAKFKASLATL  
K

>Mastacembelus\_arma\_XP\_026147489.1

MSAPRTIICLLRNDLRIHDSSELFHWAQTHAEYIVPLYCFDPRHYMGTYNYNLPKTGPFRHLHFLLESIRDLRNT  
LLNKGGNLVVRRGKPEQVVAELIKQLGVSSTVAFHEEVTSEELNVEKKLKKACDQMEVKVHTFWGSTLYHRDD  
LPFHHSIGLPDVTQFRRAVETR SRVRPLFTPEQLKPLPPGLAEGAIPTAEDLQQTEPVSDPRSAFFPCNGGE  
TQALARLKH YFWDTNAVAMYKETRNLIGVDYSTKFAPWLAVGCISPRYIYHQIKQY EKERTANQSTYWVIFE  
LLWRDYFRFVGKYGKGNRLFHVKGLQDKSVPWKKDMELFNWKEGRTGVPFVDANMRELAMTGFMNSNRGRQNVA  
SFLT KDGLDWRLGAEWFEYLLIDYDVCSNYGNWLYSAGVGNDPRENRKFNMIKQGLDYDSNGDFVRQWVPEL  
QNIKGADVHTPWTLSAALSHAVSLGENYPTPIVVSPESWSRHVNNKLSGTGPSKGGKGPCHTPKQHRDRGI  
DFYFSRSKNL

>Mastacembelus\_arma\_XP\_026166734.1

MVVNSVHWFRKGLRLHDNPALQEALNGASSLRVYILDPWFAGAANVGINRWRFLLEALEDLNSLKKLNSRL  
FVVRGQPTDVFPRFLFKEWKVTRLTTFEYDPEPYGKERDGAIIKMAQEFGVETIVRNSHTLYNLDR IEMNNNSP  
PLTFKRQFQTI VSRLELPRRPLLPITQQQMDKCHTKIADNHDQLYSIPSLEELGFRTEGLPPAVWRGGESEALD  
RLNKHLDDKKVWVANFEHSRVNTCSLYASPTGLSPYLRFGCLSCRVLYYNLRELYMKLRKHCSPPPLSLFGQLLW

REFFYTAATNNPNFDRMEGNPICVQIPWDQNPEALAKWAEGRGTGFPWIDAIMTQLREEGWIIHHLARHAVACFL  
TRGDLWISWESGMKVFEELLLDADWSVNAGSWMWLSCSAFFQQFFHCYCPVGFGRRTDPSGDYIRRYIPILKD  
YPNRYIYEPWNAPEQVKAANCVVGVDPKPKMINHAEGSRLNIERMKQVYQQLSHYRGLSLLASVPTIQEEAE  
PPMTDESQTSSGPDSPRVAADSEATGCSTAPDSSTVCAFSTSIICPGLQDTANSLSCQTLCTSSSSHTPSS  
AIISSSANHPSTSTPSSPVSTPVQSPLSKSKPLSPSLSCPTLSPSCIPATTPTQASGLGPKRKLARKMRRS  
QRQRGRQSCTLSAREGERRAEEREEVEVGGEERMEEDVELDEERMEEGTSGQTAHQQ

>Mastacembelus\_arma\_\_XP\_026167449.1

MVVNTIHWFRKGLRLHDNPSLRDSIQGADTLRCIYILDWPWFAGSSNVGINRWRFLQCLEDLASLRKLNSRL  
FVIRGQPTDVFPRLFKEWQITRLSYEYDSEPFQKERDAAIQKLASEAGVEVIVRISHTLYDLDKLIELNGAQ  
PLTYKHFQALINRMDAVELPVEITITSEVLKTCATPISEDHDDKFGVPTLEELGFETEGLTAVWPGGETEGLM  
RLERHLERKAWVANFERPRMNANSLASPTGLSPHLRFGCLSCRLFYFRLTDLYKKLKNSTPPLSLYGQLLW  
REFFYTTATNNACFDKMEGNPVCVQIPWDRNPEALAKWAEQGTGFPWIDAIMTQLRQEGWIHHLARHAVACFL  
TRGDLWISWEEGMKVFEELLLDADWSVNAGSWMWLSCSSFFQQFFHCYCPVGFGRRTDPNGDYIRRYLPILRG  
FSAKYIYDPWNAPEEIQKAAKCIIGVHYPKPMVNHAESRINIERMKQIYQQLSCYRGLGLLATVPVNPNNAA  
NGNNVTVVSTKTSQGPGRSTDDLPIQEGTSQTERRQSSQKRRHEEVSPKGNAKSWRQSK

>Mastacembelus\_arma\_\_XP\_026169697.1

MFFCLWRRRSLKRLILSDPRSSQVLAFLQFSSSETIMSGRKRKAARVPAGEEPSAKQQKQQQQKQQKQQKQQ  
QKQQKQQQRAAGLVEQLRSEDKEMKFNEKRIRFMSDTEKIKQGSEGVLYWMSRDHRVQDNWALIHAIHQLALKE  
KLPLHVSFCLVVPKSELSTLRHYSFMFKGLEEVAKECKNLDIQFHLLHGPAGEVLPGFVSDHSLGAVVTDFSP  
LREPLQWLEDVKKRLPKDIPLIQVDAHNIVPCWLASPKLEYSARTIRGKITNLLPEFLTDPLVDKHPYTATR  
TAKQINWDKTLASLQVDRTVGEPEWAKPGTKAGMAMLESFIDVRLKLFGTQRNDPNAAALSQSPWIRFGQLS  
AQRVALEVKRCGKNAGQSVSSFIEELVVRRELTDNFCFYNNKYDSVEGAYDWAQKTLKDHAADKRPYLYTREQ  
LENAKTHDKLWNAAYQYQMVTEGKMHGFMRYWAKKILEWTSSPEEALSIALYLNDRYELDGQDPNGFVGCMMWS  
ICGIHDQGWAERPIFGKIRYMNKYGCTRKFDVAQFERKYCPKKL

>Mastacembelus\_arma\_\_XP\_026189555.1

MAHTCIHWFRKGLRLHDNPALMSALRDCKQLYPVFIILDPYLHNNTCMSINRWRFLIGALKDLDCSLKNLDSRL  
FVVRGKPEDVLPKLFKTKWKVTKLTYEYDTEPYSLSRDQNVLTALAKEHGVVYKISHTLYDTRVIEENNGKA  
PRTYKRMQAIVKALGPPKRPVPAPTTEDMKDVKTPCAENHEVKYGIPTLQELGLDAAAWTLELFPGGEQEALR  
RLDQHMKRTGWVCSFEKPQTSPLSLSPSTTVLSPYVTFGCLSAFTFWRLTEVYQGGKHSPPVSLHGQLLWR  
EFFYTASVGIPNFKNMKGNPACTQVDWDTNPEFLAAWKEARTGFPFIDAIMTQLRQEGWIHHLARHAVACFLT  
RGDLWVSWEQGQKVFEELLLDGDWALNAGNWQWLSASTFFHQFFRVYSPVAFGKKTDKNGDYIKKYIPLLRK  
PAQYIYEPWKAPHSVQQAAGCIVGKDYPRPIVQHEVVSKRNIQRMKLAYAKRSPDSAESPRENKSLSKKQGVK  
RKIPSVIDMMKKKDRKKLTLV

>Mauremys\_muti\_\_KAH1171730.1

MAAAASTPVGLARSVHWFRRGLRLHDNPALQAALRDASSVRCIYILDWPFAASSAVGINRWRFLQSLLEDLDN  
SLRKLGSCLFVVRGQPTDVFPRLFKEWRVTRLTFEYDSEPFQKERDAAIVKLAQEAGVEVVIENSHTLYDLDR  
IIELNGHKPPLTYKRFQTIISRMEPKPKPVSSITSQOMEKCKSEIQENHDDTYGVPSLEELGFPTDGLAPAVW  
KGGETEALTRLDKHLERKAWVANFERPRMNANSLASPTGLSPYLRFGCLSCRLFYFRLWELYKKVKRNNTPP  
LSLYGQLLWREFFYTAATNNPKFDRMEGNPICVQIPWDRNPEALAKWAEKGTGFPWIDAIMTQLKQEGWIHHL  
ARHAVACFLTRGDLWISWESGVRVFDLELLDADFSVNAGSWMWLSCSAFFQQFFHCYCPVGFGRRTDPSGDYV  
RRYLPKLKGFPSRYIYEPWNAPEQVKAACCIIGVDYPKPMVNHAETSRLNIERMKQIYQQLSRYRGLCLLAS  
VPSCVEDLSSPVTDPASGQGSSTSTVQRLHCGQTSPPKRKHEGVEELCTEELYKRAKVTGLHISEIPIKNL

>Mauremys\_muti\_\_XP\_044843194.1

MGVNAVHWFRRKGLRLHDNPALRECIQGADSVRCVYILDWPWFAGSSNVGINRWRFLQCLEDLANLRKLNSRL  
FVIRGQPADVFPRLFKEWNIAKLSIEYDSEPFQKERDAAIKKLASEAGVEVIVRISHTLYDLDKIIELNNGQP  
PLTYKRFQTLISRMEPLEMPVETITAEMEKCTTPVSDDHDEKYGVPSLEELGFDTDGLPSAVWPGGETEALT  
RLERHLERKAWVANFERPRMNANSLASPTGLSPYLRFGCLSCRLFYFKLTDLYKKVKKNSSPPLSLYGQLLW  
REFFYTAATNNPRFDKMEGNPICVQIPWDRNPEALAKWAEGRGTGFPWIDAIMTQLRQEGWIHHLARHAVACFL  
TRGDLWISWEEGMKVFEELLLDADWSVNAGSWMWLSCSSFFQQFFHCYCPVGFGRRTDPNGDYIRRYLPVLRG  
FPAKYIYDPWNAPEEQVKAACCVIGVHYPKPMVNHAESRLNIERMKQIYQQLSRYRGLGLLATVPSPNPNGNG  
NGNGNGGLMGYSPGENISGCSSASGAQMGSDNGHTVGIQTSSLEDSHAGSSGFQQHGYSQGSILHYAQGDHQ  
QSHLLQQGRGTGSTIGTKRPNPEKETQSIGPKVQRQSTN

>Mauremys\_muti\_\_XP\_044852759.1

MKHISIHWFRRKGLRLHDNPALLAAMTDCHTLTYPIFIILDPWFPKNMRVSVNRWRFLVESLRDLDESQKLNSRL  
FVVRGCPTEVFPVLFKEWKVTRLTFEIDTEPYSRQRDCEVVRLAAEHGIQVIQKVSNTLYDTRVIAENNGKV  
PLTYVRLQTLAALGPPKRPVPAPTLENLKDCTPCKDNHDAEYGIPTLEELGQDPEQAGPRLYPGGESEALC  
RLDLHMNRATAVCNFQKPQTEPNSLNPSTTVLSPYIKFGCLSVRTFWRLAEIYQGRKHSNPPVSLHGQLLWR  
EFFYTAGAGIPNFKMEGNPVCVQVDWDDNPEHLRAWSEGRTGYPFIDAIMTQLRTEGWIIHHLARHAVACFLT  
RGDLWISWEQGQKVFEELLLDADWSLNAGNWQWLSASAFFHQFFRIYSPVAFGKKTDKGGEYIKKYLPFLRKF

PAEYIYEPWKAPRSVQEQAGCVIGRDYPKPVVVHEVVSKRNVERMKAAYARRSASATAQLEGGGGKKGAKRKT  
PAGPSVAELLTKPKPT

>Mauremys\_muti\_\_XP\_044861601.1

MSGAAPRTVICLLRNDLRYHDSEVLRLWAQKNADYVIPLYCFDPRQYLKTYYYGFPKTGPHRLKFLLESVKDLR  
QTLKKKGSNLVVRKGNPEDVVDLITQLGTVAAVAFHEEATKEELDVEKALQRVCAQHGVKIQTFWASTLYHW  
DDLPRHISRLPDVYTQFRKAVEAQAKVRPTVQMPDQLKPLAPGVEDGCIPMPPEEFGQKDPLTDPRTAFPCSG  
GETQALMRLQHYFWDNLVASYKETRNLIGIDYSTKFAPWLALGCISPRYIYEQIRKYEKERTANQSTYWVI  
FELLWRDYFRFVALKYGTRIFLLKGLQDKEVPWKKDPKLFDAWKEGRTGVPFVDANMRELAATGFMSNRGRQN  
VASFLTCDLGLDWRMGAEWFEYLLVDYDVCSNYGNWLYSAGIGNDPRENKRFNMIIKQGLDYDSNGDYVRLWVP  
EIQCVKGGEIHTLWALSNAALSQAGIALGETYPLPVVLAREWSRHINQKPNKRDHPPREKKDPSDMPRRHKDR  
GVDFYFSRNKDL

>Mauremys\_muti\_\_XP\_044870701.1

MPNMPHRTIHLFRKGFRLLHNDPTLLAALESSEVVYPVYILDRKFLMSAMNMGTLRWHFLLQSLEDLQRNLTKL  
GSCLLVIQGEYELVLRDHVKWNITQVTLDAEIEPFYKEMERTIQVLGGEMGFDVLSLMGHTLYDIRRILDMN  
GGTPPLTYKRFHLHLSVLGDPDMPVRNLTTEDFQRCKPAPELPLAECYRVPLPEDLEIPRDSQSPWRGGETEG  
LQRLEQHLKNQMSLLPLDCGAQRSLGGMSWGSSWNAVSLYWSLLMQGWIANFTKPKTI PNSLLPSTTGLSPYF  
SLGCLSVRSFFYRLSNIYAQSKNHSLLPVSLQGQLLWREFFYTASATPNFTKMAGNPICLQINWYQDAERLH  
KWRMAQTGFPPWIDAIMTQLHQEGWIHHLARHAVACFLTGRDLWISWEEGMKVFEEMLLDADYSINAGNMMWLS  
ASAFFHQYTRIFCPVRFGKRTDPEGQYIRKYLPLVLTNFP SKYIYEPWTAPEEAQKQAGCIIGQDYPLPMINHK  
EASDHNLQLMKQVREEQYGTALTRDDMDPMEMGLKRESEENS KKGKRARNREQT

>Mauremys\_muti\_\_XP\_044887525.1

MSQKSRNRQARGGEEITASPAGSGDAARTGAAAVPRGQLKGKRKVLAEPSGTEVLTVDKRRKEGEVAEGGGAG  
SLGEAVRQARLRVAPSVQDFKYNKKRVRLVSQGSCLKDAAGVVYWM SRDQRVQDNWAFLYAQRALAKQQLPL  
HVCFCCLVPKFLEATIRHFGFMLKGLQEVAEECQELDIPFHLLIGFAKDVLPAFVAGRGLGGVVTDFSPLRVPM  
QWVEEVKERLPGDVPFVQVDAHNIVPCWVASDKQEYGARTIRRKIHDRLSEFLTEFPPIKHPYSSAAPAEPI  
DWNACHASLQVDCSVKEVTWATPGTAAGLAVLESFIGERLKSFGTDRNNPNRAALS NLSPWFHFGQVSGQRAI  
LEVQKYRSKYKESVDGFIEEAVVRRELADNFCYYNRYNDKVEGAYDWAKTTLKLHAQDKRSHLYELEQLEEGK  
THDPLWNAQLQMVHEGKMHGFLMYWAKKILEWTRSPEEALKFAIYLNDRYELDGRDPNGYVGCMMWSICGIH  
DQGAERAVFGKIRYMNYAGCKRKFVVGQFERRYDPRKLQ

>Maylandia\_zebr\_\_XP\_004539639.2

MAHTCIHWFRKGLRLHDNPAALMAALKDCKQLYPVFILDPYLHNNACVGINRWRFLIGALKDLGDGSLRKLNSRL  
FVVRGKPEDVLPLKFLTKWKVTRLTYEYDTEPYSLQORDSKVTS LAKERGVEVIYKVSHTLYNIERIIEENNGKP  
PLTYTKLQAI AKTIGPPKRPI PAPTMDMDKDVKTPSENHEKEYGIPTLEELGLDTAPLGEDLFP GGGEQEARL  
RLDEHMKRTKWVCTFEKPQTS PNLSPSTTVLSPYVTFGCLSVRTFWWRLTEVYRG NKHSDPPVSLHGQLLWR  
EFFYTASLGIPSFNKMEGNSVCTQVDWDNTDYLAAWREARTGYPFIDAIMTQLRQEGWIHHLARHAVACFLT  
RGDLWISWEEGQKVFEQLLLDGDWALNAGNWQWLSASTFFHQYFRVYSPVAFGKKT DKNQDYIRKYLPLLKKF  
PAEYIYEPWKAPRSIQQAAGCIVGKDYPHPIVQHEVISKKNIQRMKLAYAKRSPESP SKSGVKRKAPSIEII  
KKKAKVK

>Maylandia\_zebr\_\_XP\_004546814.1

MSSSRTVICLLRNDLRLHDNELFHWAQRNAEHIVPLYCFDPRHYVGTYNYS LPKTGPFRLRFLLESIRDRLNT  
LISKGSNLVVRGKPEEVVADLVRQLGSSVSAFHEEVTSEELNVEKRVKDVCAQMKVKVHTCWGSTLYHRDD  
LPFPHMSRLPDVYTQFRKAVESEGRVRPVFSTPEKLNPLPPGLEEGA IPTAEDLQQTEPIDPRSAFPCSGGE  
SHALARLKHYFWDNTDAVATYKETRNLIGVDYSTKFS PWLAMGCISPRYIYHQIKQYEKERTANQSTYWVIFE  
LLWRDYFRFVSVKYGNRI FQVKGLQDKSVPWKKDMKLFDAWKEGRTGVPFVDANMRELAATGFMSNRGRQNVA  
SFLTCDLGLDWRMGAEWFE SLLIDHDVCSNYGNWLYSAGIGNDPRENKRFNMIIKQGLDYDNNGDYVRQWVPEL  
QNIRGGDVHTPWSLSNAALAHAVTLGDTYPAPIVTAPEWSRHINKKAGGTGPS PRGKKGPSHTPKQHRDRGI  
DFYFSRSKNL

>Maylandia\_zebr\_\_XP\_004553340.2

MSVTFYSKMPPSGADAQATVKWWLG EVLEGREDPEGFFAMCVSILGQVETRSQFLSLIEPLSTGDRLLHASLT  
SIYQEYFTKTEDDELELVLALSLLDMKGQRGSVQLNSILKPEGSNCTNQTGSWNRES PPQTAREMEFQISTYP  
NKQTLGTGQTVCVSEQEGDQVDSQKPKRSKNRRQRRKCTGQHLVGLPRSPS APPPVLLWFRRDLRLCDNPALV  
ASLEVGA PIVPFIWSPKEEETGITVAMGGACKYWLHQALLCFCSSLEHIGSRLVLKANGEMTSTESSLKA  
LKELIKETGARTVLANALYEPWLKERDDLVSALQKQGV ECRMFSYCLRDPYSVTTEGVGLRGIGSVSHFMS  
CCRQNPGTAVGVPLDPPVSLPTPAHWPKGLCLDELGLARMPRRKDGT TVDWAANIRKTWDFSEGG AQARLEAF  
LHDGVYRYEKESGRADAPNTSCLSPYLHFGQLSPRWLMWDAKGARCRPLKFQRKLAWRDLAYWQLTLFPDLPW  
ESIRPPYKALRWSSDRGHLKAWQRGRTGYPLVDAAMKQLWQTGWMNNYMRHVVASFLIAYLYLPWQEGYRWFQ  
DTLVDA DVAIDAMMWQNGGMCGLDHWNFVMHPVDAAMTCDPYGT YVRKWCP ELAELPDELIHKPWKCPASMLR  
RAGVVFQGSYPERIITDLEERNQSLQDVALVRREFEQYVDKRS GCDLVPLPPRLVSEALGLSHKDGAVVTQG  
KQFLLPVITRMEFKHQHEDPDADATSNPYN AVLKGYVSRKRDETI AFLNKRDF TASVMHEAVQRKERLNSDYR  
RMEGLPPSPSPRGRARRTPTAKDRFSIVPGGAVTSLK

>Maylandia\_zebr\_\_XP\_004556263.1

MVVNSVHWFRKCLRLHDNPALQEALNGADAVRCVYILDPFFAGAANVGINRWRFLLEALEDLDSSSLKKLNSRL  
FVVRGQPTDVFPRFLKEWNVTRLTFEYDPEPYGKERDGAIIKLAQEFGVETIVRNSHTLYNLDRIIEMNNNSP  
PLTFKRQFQTIIVSRLELPRRPLPPITQQQMDKCHTKIEDNHDQLYSIPSLEELGFRDGLPLAVWHGGESQALD  
RLGKHLDDKKVWVTSLEHSRVKTCSTLYASPTGLSPYLRFGCLSCRVLYYNLRELYMKVRKCTPPLSLFGQLLW  
REFFYTAATNNPNFDRMDGNPICVQIPWDQNPEALAKWAEGRGTGF PWIDAIMTQLRQEGWIHHLARHAVACFL  
TRGDLWISWESGMKVFEEMLLDADWSVNAGSWMWLSCSAFFQQFFHCYCPVGFGRRTDPTGDYIRHYIPILKD  
YPNRYIYEPWNAPESLQKAANCVVGVDPKPMINHAESSRLNIERMKQVYQQLSHYRGLSLLASVPTIQEEAE  
PPMTDESQTSSGPDSPQRPVANTEEDVCYEAPDSSTVCPSSSAPHDPQEQYQAPCISSVILIGNKEKRP

>Maylandia\_zebr\_\_XP\_004570537.1

MLHCVWRSTSPFSAPGRFLKLLPHHHQRPSSPALFFLTSTFFSCQPTMSGTKRKASSATAGKDHRAKQQKLAPV  
KQEKKEKVGWGLQSLVQLQRSEKKDVKFNNKRLRFLSDTEKIKQGSEGVLYWMLRDQRVQDNWALIHAQRLAV  
KENLPLHVCFCFLVVPKSELSTLRHYSFMLKGLEEVAKECEQLNVQFHLLHGAPEKVLPGFVSDHSFGAVVTDF  
SPIREPLQWLEDVKKKLSKDIPFIQVDAHNIVPCWVASPKQEYSARTIRGKITNLLPEFLTDFPLVDAHPTA  
TRTAKGVDWDKTLASLDVDRNVKEPEWAKPGTKAGMDMLESFIDVRLKLFGSQRNDPNAPALSQSLSPWLRFGQ  
ISAQRVAWQVQRNGKNASQSVPAFIEELVVRRELTDNFCFYNNKYDSVEGAYEWAQKTLKDHAIDERPYLYTR  
EQLEKAKTHDKLWNAAQYQMVTEGKMHGFLRMYWAKKILEWTSSPEEALSIALYLNDRYELDGQDPNGFVGC  
WSICGIHDQGWAEAVFGKIRYMNYKGCLRKFNVAQFERKYCPKSL

>Maylandia\_zebr\_\_XP\_004570852.1

MVVNTIHWFRKGLRLHDNP SLKDSIQGSDTLRCIYILDPWFAGSSNVGINRWRFLLLHCLEDLDASLRKLN  
FVIRGQPTDVFPRFLKEWQINRLSYEYDSEPFQKERDAAIQKLANEAGVEVTVRISHTLYNLDKIIELNGNQ  
PLTYKRQFQAVINRMDAEMPATITSEVLKNCVTPISEDHDEKFGVPSLEELGFETEGLTAVWPGETEALM  
RLERHLERKAWVANFERPRMNANSLASPTGLSPYLRFGCLSCRFLFYFKLTDLYRKVKKNHTPPLSLYGLLW  
REFFYTTATNNPCFDKMDGNPICVQIPWDRNPEALAKWAEGRGTGF PWIDAIMTQLRQEGWIHHLARHGVACFL  
TRGDLWISWEEGMKVFEELLLDADWSVNAGSWMWLSCSSFFQQFFHCYCPVGFGRRTDPNGDYIRRYLPILRG  
FPAKYIYDPLNAPDEVQKAAKCIIGVHYPKPMVNHAEEASRLNIERMKQIYQQLSCYRGLGLLATVPANSNFGG  
NGTNPRAVCTVTNEGAGGSSKDPVSVQVGMSTERAQSVQKRHEETPLESSSKSWKQSK

>Megalops\_atla\_\_KAG7454755.1

MVVNTIHWFRKGLRLHDNP SLRESIQGADTVRCVYILDPWFAGSSNVGISRWRFLLLQCLEDLDASLRKLN  
FVIRGQPTDVFPRFLKEWNI TRLSYEYDSEPFQKERDAAIRKLASEAQVEVTVCISHTLYDLDKIIELNGGQS  
PLTYKRQFQAVISRMGAVETPAEAITAEVMGNCTTPIGDDHDEKFGVPSLEELGFDTGLASAVWPGETEALT  
RLERHLERKAWVANFERPRMNANSLASPTGLSPYLRFGCLSCRFLFYFKLTDLYKKVKRNSSPPLSLYGLLW  
REFFYTAATNNPRFDKMEGNPICVQIPWDRNPEALAKWAEGRGTGF PWIDAIMTQLRQEGWIHHLARHAVACFL  
TRGDLWISWEEGMKVFEELLLDADWSVNAGSWMWLSCSSFFQQFFHCYCPVGFGRRTDPNGDYIRRYLPILRG  
FPAKYIYDPLNAPDSVQKAAKCVIGVQYKPMVNHAEEASRLNIERMQRQIYQQLSCYRGLGLLATVPSPNPGSG  
EGTGVTMAGPAVEVSQEGMASGCQMTVKPQTEWGAGALLYPQGDHQPSSGGVQPQGLTCSSSAVCYAESQPGHS  
AGLQQGHHTSALSTVKRHSSDALANISSKVQRQNSN

>Megalops\_atla\_\_KAG7456922.1

MQYYRFLFQPVLRNISQCVSPIRQRQRPNSVPFQIRLRLQQCVSMQEGGSKVTAKNGGEGKVASKRKGEPEVA  
GGKKQPKVPPKEGKKKREEGWLESEVTEARRAAQGVKFNEKRLRFLSEAQVKVQGTQGVLYWMSRDQRVQDN  
WALIYAQQ LAVTEELPLHVCFCCLQPQSPDATLREYSFILKGLEEIAKECSVLGIEFHLLLTAGEVLP GFVVRD  
WSLGAVVTDFSPLRIP LKWWEDVKKGLPTDVPFQVDAHNVPWCVASDKQEYSARTIRGKITKLLPEFLTQF  
PLVDKHPHSASKPAKLVDWASTLSTVEVDRSVGEVEWARPGTAAGMAMLESFMDTRLRDYASERNNNPNSDALS  
QLSPWIHFHGHISAQRAVLQVQRNGANRAQSVPAFVEELVVRRELADNFCFYNNKYDKEVGASDWARKTLMDDHA  
KDPRQYVYSKEQLEKAKTHDRLWNAAQYQMVTEGKMHGFLRMYWAKKILEWTSSPEEALAIAYLNDRYELDG  
RDPNGFVGCMSICGIHDQGWKERPIFGKIRYMNYAGCTRKFNVQQFEKQYCPK

>Megalops\_atla\_\_KAG7467932.1

MVVNSVHWFRKGLRLHDNP SLQEALNGADTVRCVYILDPWFAGSANVGVNKWRFLLESLEDLDASLRKLN  
FVVRGQPADVFPRFLKEWNVTRLTFEYDSEPYGKERDAAIIKMAQEFGEVVRVKNSHTLYNLDRIIELNNNSP  
PLTFKRQFQAIISRLGLPKRPLATITKQQMDSCRTDISDNHNERYGVPVPSLEELGFETHGLSPAVWKGGETEAL  
RLNKHLDRAKAWVANFERLRINICSLMASPTGLSPYLRFGCLSCRFLFYNNLRELYMKVRKHSSPPLSLFGQLLW  
REFFYTAATNNPNFDRMEGNPICVQIPWDRNPEALAKWAEAKTGFPWIDAIMTQLRQEGWIHHLARHAVACFL  
TRGDLWLSWESGMRVFEELLLDADYSVNAGSWMWLSCSAFFQQFFHCYCPVGFGRRTDPSGDYIRRYLPKLKD  
YPNRYIYEPWNAPEPVQKAANCVVGVDPKPMINHAEGSRLNIERMKQIYQQLSHYKGLSLLASVPSIQEEAE  
PPMTDSSNPQSSTSVLSATRQSKQPTMKKRARPSELQRDDKCTQPKVPRASMAEEKPGDKQ

>Megalops\_atla\_\_KAG7473567.1

MSTKDEVKPVAVHKHFMRELLLGQDPEEFFCLSLSLGHQYTQEQFLDLIEPLAEGHEELHTCLVTIFLDYF  
TKVQSGKGVEEELELALTL SMQEMREGELAAQGPLSHAQRLSYAQRAIRGGRVAQKNGNSHCSRAPVPCDME  
QAQRERCTEGLIGKITNIQNESVCVTGTEVRYPSLSRSDVDVPVGINSSQDEKSKSRRRRQRKRQQLAMSL  
PSSPRPVLLWFRRDLRLNDNPALIGSLEVGGPVIPVFLWCPEEEEGPGVTVAVGGASKYWLHALLSLNHSLE

RLGSHLVTVKVETSSQEALQRLVTDGTAGTLLATALYEPWLKERDDLVTALQRQGVKQCQLYHSYCLRDPNSV  
STEGVGLRGIGSVSHFMSCCQQNPGPGLGTPVDAPLCLPVPSAWPQGCHLSQLALARMPRRKDGTVVDWATNI  
RSSWDFSEEGAQARLQAFRLDGIYRYEKESCRADAPNTSSLSPYLHYGQISPRSLLESRSARCRPPKQFQRKL  
AWRDLAYWQLTLFPDLPWESLRPPYKALRWSSDRAHLKAWQGRGTGYPLVDASMRQLWLTGWMNNYMRHVVAS  
FLIAYLHLPWQEGYRWFQDITLVDADVAIDAMMWQNGGMCGLDHWNFVMHPVCAALTCDPCGSFVRKWCPELAE  
LPDEFIHKPWQCPTSLRRAGVVLGQNYPERIVTDLEERRAQSLLQDVAVVRRQFGQYVDRHSGCDLIPLPDRL  
VKEALGRGDIVQSGSRFLLPVITRMEFKHQAHDTDAKSNPFDVAVLKGYSRKRDETI AFLNERDFTASVLSN  
AQRDRQERDQRALEGLPHPPAAHSRARRTPSKDIFSVVPAGVTVRHK

>Megalops\_atla\_\_KAG7477630.1

MRLSPPYRQAVGRETTGGRGRPKPRESDRDASAMTHRTIHLFRKGLRLHDNPTLVAALESSEALYPVYVLDRAF  
LEGAMRTGALRWRFLQLSLRDLQRGLAALGSRLYLVRGRHEAVLRQLVRRWGVVTQLTFDAEVEPFHAQLEGSL  
RTLAQELGLSVQSRVAHTLYDVKRIKANGGKPLTYKKFLHVLVSVLGEPAKPAEITHEDEFKCKTPIIEGS  
EDEYQVPTLEDLGLIEVDVEVLWPGGETQGLKRLKHLSESQGWVNFVSKPRTIPNSLLPSTTGLSPYFSLGCLS  
VRSFYRLSNIYAQSKNHSLLPPVSLQGQVLWREFFYTASATPNFTKMAGNPICLQINWYENQEALDKWRTAQ  
TGFPWIDAIMTQLRQEGWIHHLARHAVACFLTRGDLWISWEEGMKVFEHLLDADYSVNAGNMMWLSASAFFH  
QYTRIFCPVRFGRRTDPDGQYLRKYLPLVLRNFPSKYIYEPWTAPLEVQEEAGCIIGKDYPLPMVDHSEVSQRN  
LALMRQVRSEQENTAQLTRDLADDPMEVGVKREHQDEQGGVTEDHSEKPERASKRFSPDGDCKALSCSWASDS  
IRVPELSGEVM

>Megalops\_atla\_\_KAG7484496.1

MSPLIPAHLLIGMCLMSSSGCPADMRHISVHWFRKGLRLHDNPALLAALQDCTEIYPVFVLDPGVPNQAHASIN  
CWRFLTGAALKDLDCSLKKLNSRLFVLRGKPEEVFPRLFQRWQVTRLTTFELDTPEYSQDQDEKVVKLAKQHNVE  
VIQKVSHTLFDTERRIIAKNNGKPLTFNRLQAVVQSLGAPEKPVPPPTLEDMMKGVRTPCSEKDEESYKVPTLE  
ELGLDPLSAGPELYPGGEQEALRRLDEHMKRTGWVCHFQKPESTPNALSPSTTVLSPYVRYGCLSVRTFWWRL  
TDVYQGRKHSQPPVSLHGLLWREFFYTTSVGIPNFNRMEGNPICLQVDWDSNPEHLAAWREARTGFPFIDAI  
MTQLRQEGWIHHLARHAVACFLTRGDLWISWEEGQKVFEELLLDGDWALNAGNWQWLSASAFFHQYYRVYSPI  
AFGKKTDKSGEYIKKYLPIKKFPADYIYEPWKAAPRSVQERAGCIVGKDYPRPIVDHEVVSKENMQRMKMAYS  
KRSKTFNESNGKAKGEKRAASVVDMLMKKKVKVN

>Megalops\_atla\_\_KAG7488658.1

MSAARTIICLLRNDLRLHDNEVFHWAQRNAEHIVPLYCFDPRHYLGTYCYNFPKTGPFRLGFLLDVSKDLRAT  
LQKKGSNLLVRQKPEEVVGDILIRQLGSVSAAVAFQEEVTQEELDVEKGVKDVCSQLKVQVQTFWGSTLYHGED  
LPFNHISRLPDVYTEFRKAVESRCRVRPVLPTDLLKPLPPGLEEGPIPTHQDLEQLDAPADRSAPPCSGGE  
SQALARLQHYFWDTDVASYKETRNGLIGNYSTKFAPWLMGCISPRYIYEQIKKYERERTANQSTYWVIFE  
LLWRDYFKFVAMKYGNKIFALEGLQKSVPWKKDMTLFNAWKEGRTGVPFVDANMRELAQTGFMSNRGRQNV  
SFLTKDLGLDWRMGAEFQYLLVDYDVCSNYGNWLYSAGIGNDPRENKFNMIKQGLDYDNGDYVRQWVPEL  
RGIKGGDVHTPWTLSAALSHAQVSLGETYPSPIVMAPEWSRHVNKKPSGAGPSGAGPSQGRKRGPSHTPKQH  
RDRGIDFYFSRSKNL

>Megalops\_cyprinoides\_XP\_036399197.1\_cryptochro

MVVNSVHWFRKGLRLHDNPQLQEAALNGADTVRCVYILDPWFAGSANVGVNKWRFLLESLEDLDASLRKLNSRL  
FVVRGQPADVFPRLFKEWNVTRLTFEYDSEPYGKERDAAIKMAQEFGEVVRVKNSTLYNLDRITELNNSP  
PLTFKRFQAIISRLGLPKRPLATVTKQQMDSCRADISDNHNERYGVPVSLEELGFETHGLSPAVWKGGETEAL  
RLNKHLDRAKAVANFERLRINICSLMASPTGLSPYLRFGCLSCRLFYNNRELYMKVRKHSSPPLSLFGQLLW  
REFFYTAAATNNPNFDRMEGNPICVQIPWDRNPEALAKWAEAKTGFPWIDAIMTQLRQEGWIHHLARHAVACFL  
TRGDLWLSWESGMRVFEELLLDADYSVNAGSMMWLSCSAFAFFQFFHCYCPVGFGRRTDPSGDYIRRYLPKLK  
YPNRYIYEPWNAPEPVQKAANCVGVDPYKPKMINHAEGSRLNIERMKQIYQQLSHYKGLSLLASVPSIQEEVE  
PPITDNSNPQSSTSVLSTTRQSEQPTMKKRARPSELQRDDKCTQPKVPRASMAEEKPGDKQ

>Megalops\_cyprin\_XP\_036386825.1

MTHRTIHLFRKGLRLHDNPTLVAALESSEALYPVYVLDRAFLEGAMRMGALRWRFLQLSLRDLQRGLAALGS  
RLVQLQRHEAVLRELVRWGVVTQLTFDAEVEPFYARLDDSLRALAQELGLSVQSCVAHTLYDVKRIKANGGK  
PPLTYKKFLQVLSVLGEPAKPAEITRQDFEKCKTPTTEEGSENEYQVPTLEDLGLIEVDVEVLWPGGETQGLK  
LEKHLESQGWVNFVSKPRTIPNSLLPSTTGLSPYFSLGCLSVRSFYRLSNIYAQSKNHSLLPPVSLQGQVLW  
EFFYTASATPNFTKMAGNPICLQINWYENQEALDKWRTAQTGFPWIDAIMTQLRQEGWIHHLARHAVACFL  
RGDLWISWEEGMKVFEYLLDADYSVNAGNMMWLSASAFFHQYTRIFCPVRFGRRTDPDGQYLRKYLPAKKN  
PSKYIYEPWTAPPEVQEEAGCIVGKDYPLPMVDHSEVSQRNLAALMRQVRSEQENTAQLTRDLADDPMEVGVK  
EHQDDQGSVTQDHSKPERASKRFSPDSCKALSYSWASDGMRLPELSGEVM

>Megalops\_cyp\_XP\_036377802.1\_cry\_DASH

MSAARTIICLLRNDLRLHDNEVFHWAQRNAEHIVPLYCFDPRHYLGTYCYNFPKTGPFRLSFLLDVSKDLRAT  
LQKKGSNLLVRQKPEEVVGDILIRQLGSVSAAVAFQEEVTQEELDVEKGVKDVCSQLKVQVQTFWGSTLYHGED  
LPFNHISRLPDVYTEFRKAVETRCRVRPVLPTDLLKPLPPGLEEGPVPTHQDLGLQDAPADRSAPPCSGGE  
SQALARLQHYFWDTDVASYKETRNGLIGNYSTKFAPWLMGCISPRYIYEQIKKYERERTANQSTYWVVF  
LLWRDYFKFVAMKYGNKIFALEGLQKSVPWKKDMTLFNAWKEGQTGVPFVDANMRELAQTGFMSNRGRQNV

SFLT KD LGLDWRMGA EWFQYLLVDH DVC SNYGNWLYSAGIGNDPREN RKFNMIKQGLD YDNNGDYVRQWVPEL  
RGIKGGDVHTPWT LSTAALSHAQVSLGETY P SPIVMAPEWSRHVNKKPSGAAPSQGRKRGPSHTPKQHRDKGI  
DFYFSRSKNL

>Megalops\_cyp\_XP\_036379574.1\_cry\_circad

MRHITIHWFRKGLRLHDNPALLAALQGCTE IYPVFVLDPGVPNQAHASINCWRFLIGALEDLDCSLKKLNSRL  
LVLRGKPEEVFPRLFQRWKVTRLTFEVDTEPYSQHRDEKVVKLAKQHNVEVIQKVSHTLYDTERIIAKNNGKP  
PLTFNRLQAVVQSLGAPEKPVPPMLEDMKGVRTPCSEKDEESYKVPTLEELGLDPLSAGPELYPGGEQEALR  
RLDEHMKRTGWVCHFQKPETSPNALSPSTTVLSPYVRYGCLSARTFWWRRLTDVYQGRKHSQPPVSLHGQLLWR  
EFFYTTSVGIPNFNRMEGNPVCLQVDWDRNPEHLAAWREARTGFPFIDAIMTQLRQEGWIHHLARHAVACFLT  
RGDLWISWEEGQKVFEELLLDGDWALNAGNWQWLSASAFFHQYYRVYSPIAFGKKTDKSGEYIKKYLPIKKF  
PAEYIYEPWKAPRSVQERAGCIVGKDYPRPIVDHEVVSKKNMQRMKMAYSKRSETFNESNGKAKGEKRKAASV  
VDMLMKKKVKVN

>Megalops\_cyp\_XP\_036386216.1\_cry\_circad

MAPNSIHWFRKGLRLHDNPALREAVRGAATVRCVYFLDPWFAGSSNLGVNRWRFLQLCLEDLDASLRKLNSRL  
FVIRGQPANVFPRLFKWKISRLTFEYDSEFPFGKERDAAIRKLAMEAGVEVIVKTSHTLYDLDKIIELNGGQP  
PLTYKRQFQTLISRMDPPELPVEPLSDAFMGRCVTPVGDDHGDYGVPSLEELGFDTEGLPSAVWPGGETEALT  
RIERHLERKAWVANFERPRMNANSLASPTGLSPYLRFGCLSCRLFYFKLTDLYRKVKKNSSPPLSLYGQLLW  
REFFYTAAATNNPRFDKMEGNPICVRIPWDWNAEALAKWAEARTGFPWIDAIMTQLRQEGWIHHLARHAVACFL  
TRGDLWISWEEGMKVFEEMLLDADWSVNAGSWMWLSCSSFFQQFFHCYCPVGFGRRTPNGDFIRRYLPVLRG  
FPAKYIYDPWNAPHSVQTAAKCIIIGIHYPKPMVNHAEEASRLNIERMKQIYQQLSRYRGLGLLASVPSNHNGNG  
NGNGNGHNGSGHSGNGAMMAYSPGEQQPGISTPHGATVSGVNGSSSILLNFGGDERPGPSGMQQHGYHTVS  
DQGQGVAGGHRLYQPSSSHEFAVPQHPGRLGHAAGSGTGKREREAERESGADSDPPSSALKVQRPNSEKSGDL  
QDVNMVSF

>Megalops\_cyp\_XP\_036391499.1\_photolyase

MSTKDEVKPVAVHKHFMRELLLRQDP EEEFCLSLSLLGHQYTQEQLDLIEPLAEGHEELHACLVTIFLDYF  
TKVQSGKGVEEELELALTL SMQEMREGELAAQGPLSHVQDL SYAQRAIRGGKVVRNGNSHCSRAPVPCATE  
QAQTERYTEGLIGKITNCQENMCVTVTEVMY PPLSRSEDDVPVEINSSQDEKSKRSRRRRQRKRQQLAMSL  
PSSPRPVLLWFRDLRLNDNPALISSLEVGGPVI PVFLWCPEEEEGPGVTVAVG GASKYWLHALLSLNHSLE  
RLGSHLTVKVETSSQEALQRLVADTGAGTL LTTALYEPWLKERDDL VFTALLRQGVKCFYHSYCLRDPNSV  
STEGVGLRGIGSVSHFMSCCQONPGPGLGTPVDAPLCLPVP SAWPQGSHLSQLGLARMPQRKDGTVVDWATNI  
RSSWDFSEEGAQARLQAFLODGIYRYEKE SCRADVPNTSSLSPYLHYGQISPRSLLSGRSARCRPPKFQRKL  
AWRDLAYWQLTLFPDLPWESLRPPYKALRWST DRAHLKAWQGRGTGYPLVDASMRQLWLTGWMNNYMRHVVAS  
FLIAYLHLPWQEGYRWFDOTLVDADVAIDAMMWQNGGMCGLDHWNFVMHPVSAALTCDP CGSFVRKWCPELAE  
LPDEFIHKPWQCPTSLRRAGVVLGQNPDRIVTDLEERRA QSLKDVAVVRKQFGQYVDRHSGCDLIPLPDR  
L VKEALGGGDLMSGSRFLLPVITRMEFKHQAHDADAKSNPFD AVLKGYVSRKRDETI AFLNERDFTASVLS  
EN AQRRDRQERDQRALEGLPHPPATRSRARRTPSKDVFSVVPAGVTALHK

>Megalops\_cyp\_XP\_036410274.1\_CPD\_photol

MQCYRFLIQPVLRISISQCVPPIRQRQRP NPVHFVRLRLQWCASMQEGGSKVTAKNGGEGKAASKRKGE PVEA  
GGNKQPKVVPKKEGKKKREQGWLESEVAEARRGAQGVKFNERRLRHLSEAQVKVQGTQGVLYWMSRDQVRQDN  
WALIYAQQVAVTEELPLHVCFC LQPQSPDATLREYGFILKGLEEIAKECNVLGIEFHLLLTAGEVLP GFVVRD  
WSLGAVVTD FSPLRIPLKWVEDVKKGLPSDVPFIQVDAHN IVP CWVASDKQEYSARTIRGKITKLLPEFLTQF  
PLVDKHPHCASKPAKPV DWAHTLSTVEVDRSVGAVEWARPGTAAGMAMLESFVDARLRDYASERNNPNSDALS  
QLSPWIHF GHISAQRAVLQVQRDGP NRAQSVPAFVEELVVRRELADNFCFYNKNYDKVEGASDWAQKTLKDHA  
KDPRQYVYSREQLEKAKTHDKLWNAAQYQMVTEGKMHGFLRMYWAKKILEWTS S PEEALAIAYLNDRYELDG  
RDPNGFVGCMWSICGIHDQGWQERPVFGKIRYMYNAGCTRKFN VQQFEKQYCPK

>Melanotaenia\_boes\_\_XP\_041824669.1

MSASRTVICLLRNDLRVHDNELLHWAQKNAEHIVPLYCFDPRHYVGTYNFNLPKTGPFRLRFLLESVRDLRNT  
LLSKGSNLVVRGKPEEVVADLIKQLG SVSSVAFHEEVASEELNVEKKVKEVCAQMVKVHTCWGSTLYHRDD  
LPFHHSRLPDVYTQFRKAVESQSRVRPVFPTPERLNPLPPGLEEGAIPSAEDLQQTEPVADPRSAFPCSGGE  
SHALARLKHYFWDTD AVATYKETRNGLIGVDYSTKLSAWLALGCISPRYIYHQNQYERERTANQSTYWVIFE  
LLWRDYFKFVGKYGNRMFQIKGLQDKSMPWKTDMKLFDAWKEGRTGVPFVDANMRELAMTGFM SNRGRQNV  
A SFLT KD LGLDWRMGA EWFYLLIDHDVCSNYGNWLYSAGVGNDPREN RKFNMIKQGLD YDSNGDYVRWWIPEL  
KDIRGADVHTPWNLSLASLSHACVSLGDTYPTPIIIAPEWSRHFNKKPSGSGPTAKGKKGPSHTPKQHRDRGI  
DFYFSRSKNL

>Melanotaenia\_boes\_\_XP\_041847736.1

MTQISIHWRKGLRLHDNPALMAALRDCKELYPVFILDPYLHNNTHVGINRWRFLLGALKDLDCLSRKLNSRL  
FVVRGKPEDVFPKLFTRWSVTKLTYEYDTEPYSLSRDKKVTTLAKEHGIDVVYKISHTLYDIDRIIEENNGKP  
PLTYNRLQAIVRMLGPPKRPIPAPTMEDMKDIKTPCSEKHEKKYGIPTLEELGMDMASFRDELFP GGGEQESLQ  
RLDEHMKRTGWVCSFEKPQTYPNLSLSPSTTVLSPYITFGCLSARTFWWR LAEVYQ GKHS DPPVSLHGQLLWR  
EFFYTASVGIPNFNKMEGNDVCTQVDWDKNPEYLA AWREARTGFPFIDAIMTQLRQEGWIHHLARHAVACFLT

RGDLWISWEEGQKVFEELLLDGDWALNAGNWQWLSASTFFHQFFRVYSPIAFGKKTDKNGDYIKKYLPLLKKF  
PAQYIYEPWKAPRSVQQAAGCIVGKDYPRPILEHEVNSKKNIQRMKQAYAKRSSDGTESPTKKQGVKRKAPT  
IDMLLKARKA

>Melanotaenia\_boes\_\_XP\_041848176.1

MKISFIHVGLCSSFLSASSRLVLWPGQTLILSTTAFIGEPIMSGKKRKATSSAGSQEPDAKQPKVASEKEE  
KPKKAAGWLQSLVKQQRADKKEMKFNKKRQRYITDTEKIKQGCKGVLYWMLRDQRVQDNWALIRAQQLAAKEN  
LPLHVCFLVVPKSELSTLRHYGFMLKGLEEIAKECKHLNIQFHLLHGAAGDVLPGFVSDRGFGAVVTDFSP  
REPLQWLKDIEKSLPKDVPLIQVDAHNIVPCWVASPKQEYSARTIRGKITNALSEFLTDFPPVEKHPHTAASS  
AKPVDWDKTLASLQVDKAVGEPQWAKPGAEAGMNMLESFIDVRLKLFSTQRNNPNVAALSQSLSPWLRFGHVSA  
QRVALQVQRCGKSASQSIPPFIEELVVRRELTDNFCFYNNKYDRVEGAYEWAQKTLKDHAKDKREHLYTREQL  
EKAKTHDKLWNAQYQMVSEGKMHGFLRMYWAKKILEWTTSPPEALSIALYLNDRYELDGQDPNGFVGCWMSI  
CGIHDQGWAERPVGKIRYMNYKGCLRKFNVAEFERKYCPKKA

>Melanotaenia\_boes\_\_XP\_041852008.1

MVVNSVHWFRLRLHDNPALQEALNGADTVRCVYILDPWFAGAANVGINRWRFLLEALEDLDSLSKRLNSRL  
FVVRGQPTDVFPRLFKEWNVTRLTFEYDPEPYGKERDGAIIKVAQEFVETVVRNSHTLYNLDRIIEMNNNNP  
PLTFKRQFQTVSRLELPRRPLPPITKQQMDRCCTKIADNHDQLYSIPSLEELGFRTEDLPPAVWRGGESEALD  
RLNKHLDKKVWVANVEHTRVNTCSLYASPTGLSPYLRFGCLSCRVLYYNLREFYMKLRKRCSPPLSLFGQLLW  
REFFYTAAATNNPNFDRMEGNPICVQIPWDQNPEALAKWAEGRGTFPWIDAIMTQLRQEGWIHHLARHAVACFL  
TRGDLWISWESGMKVFEELLLDADWSVNAGSWMWLSCSAFFQQFFHCYCPVGFGRRTPDPSGDYIRRYIPILKD  
YPNRYIYEPWNAPESLQKAANCVVGVDPKPKMINHAESSRLNIERMKQVYQQLSHYRGLSLLASVPTIQEEAE  
PLMTDESQTSSGPDSPPRDAADYEAAGCSTAPDSSTSVPHPDEEDAADEPSHPSSPACSPSSRSKPSPPSSSC  
STSSMCPSPSAALTQTSSVGSRRKSVARKVRRSQRRGRQCCLATPREEERGEAEGERMEESVVVEEMTG

>Melanotaenia\_boes\_\_XP\_041852192.1

MPPSAGSDQTVVRQMLREVLVGREDPEGFFAICVSVLGYGETRSQFPSLIKPLSTANISLHSVLTISIYQEYFS  
KTEDDELELALALSLEMKNPSPSTSIQEPQPLQPGVRINHRSVQSNYVSKSQERNFTQLEDVIRRENTSSP  
QFGFWNRENTHLDDNQTPGTAQTLCFPGSSASFSKQNTENQGAQTMEEGDLNQSEKPKRSKNRRQRKRGGQQ  
LVGLSRSPSAPPPVLLWFRDLRLCDNPALVGSLELDAPVIPVFIWSPEEEEGPGVTVAVGGACKYWLHQALL  
CFCGTLEYIGSHLIFLKASAEKNKGSSLYTLKQLVKETGARKVLANALYEPWLKERDDAVVSALQKEGVECR  
LFHSYCLRDPYSVSTEGVGLRGIGSVSHFMSCCRQNPGAAGVTPLDPPVSLPSPTHWPQGVPLDTLGLAWMPR  
RKDGTIINWAANIQKSWDFSEDGAHARLDAFLHDGVYRYEKESGRADAPNTSCLSPYLHFGQLSPRWLLWDAK  
GAHCRPQKFQRKLAWRDLAYWQLTLFPDLPWESLRPPYKALRWNTDRSHLKAWQRGKTGYPLVDAAMRQLWLT  
GWMNNYMRHVVASFLIAYLHLPWQEGYRWFQDTLVDADVAIDAMMWQNGGMCGLDHWNFVMHPINAAMTCDPC  
GSYVRKWCPELADLPDELIHKPWKCPASMLRRAGVVFQGTYPQRIITDLEERSQSLQDVALVRKEFGQYVDK  
RSGCDLVPLPRLVSEALGLSHRDGIVVSEGKHFLLPVITRMEFKYQQEDPDADAASNPNYAVLKGYSRKR  
ETIAFLNEKDFTASVMYEGAQRQERLEKDYRMEGLPPSPSTRGRARRTPTAKDRFSIVPGGAVTSLK

>Melanotaenia\_boes\_\_XP\_041852785.1

MVVNTIHWFRKGLRLHDNPRLDSIRGADTLRCIYILDPWFAGSSNVGINRWRFLHLCLEDLASLRKLNSRL  
FVIRGQPTDVFPRLFKEWKIGRLSYEYDSEFPFGKERDAAIQLKASEAGVEVIVRISHTLYDLDKIIELNGSQP  
PLTYKRFQALINRMDAVDLPAETITSEVIKNCVTPIRDHDDKFGVPSLEELGFETEGLTAVWPGGETEALM  
RLERHLERKAWVANFERPRMNANSLASPTGLSPYLRFGCLSCRLFYFKLTDLYRKVKKNSTPPLSLYGQLLW  
REFFYTATNNPCFDKMEGNPVCVQIPWDRNPEALAKWAEGRGTFPWIDAIMTQLRQEGWIHHLARHAVACFV  
TRGDLWISWEEGMKVFEELLLDADWSVNAGSWMWLSCSSFFQQFFHCYCPVGFGRRTPDNGDYIRRYLPILRG  
FPAKYIYDPWNAPEEVQKAAKCMIGVHYPKPMVNHAESRINIERMKQIYQQLSCYRGLGLLASVPVNPNGHA  
NGNTGTSQGGGTSEDPSAPEGMSRAERGQSTHKRRHEDVPSESNKSWKQSK

>Melibe\_leo\_AWY10933.1\_non-photor

MKEDINDNKNQSKKQVLFWFRKGLRLHDNPALYSAIDGAVTYRCVYILDPWFAGASQVGINKWRFLLESLEDL  
DNSLRKLNSRLFVARGQPADVLPRLFQEWRIITLAFEEDSEPYGKERDSAISAMAREFNIQVISKSSHTLYNP  
KTVIAANGNSPPLTYKRFQSIKSTLDPPEQPCDTVGANVVKSVTPVTDDHDDRFSVPTLDELGFDTDSLGPS  
KFQGGESEALARLHRHLERKAWVASFERPKMSPQSLYPSGTGLSPYLRFGCLSPKTFYWKLTLEYKKVKKGID  
PPLALHGQLLWREFFYTVSTNNPKFDRMVGNISICVQIPWEHNPEALAKWAEGMTGYPWIDAIMIQLRKEGWIH  
HLARHAVACFLTRGDLWISWEEGMKVDFDEMLLDADWSVNAGTWMWLSCSAFFQQFFHCYCPVGFGKRADPSGD  
FVRQYLPVLKNMPTRYIYEPWTAPESVQKAAKIVGKDYPLPMVAHAEQSRINLERMRQIYKRLVLKSTASKR  
IFLDLPKIPKVGMFLSKAKMFLSSSSDEEASTKPRRRKQVDSSAA

>Melibe\_leo\_AWY11207.1\_photorecep

METMISESSNNVTIHWFRHGLRLHDNPSSLGLENCSEFYPVFIFDGSVAGTKTAGYSRMQFLETLRDLDEN  
LKKKGSRLYVFMGEPVKIFRQLFEDWNATRLSFEQDPEPIWQDRDNNVKDLCDACNVEWIERVSHMLWDPHVI  
LRANGGSPPLTYAMFCQVTEIVGLPPRPVEDPDFSKVTLPVSDHHDRLYGVPSSLEKLGVAECEAQLSPYCRY  
LGGETKAAALLVSRLAKESKGFSLGQVQANQMPDLTGMPMSLSPHLRFGSLKIRKLYWALRDYSELYPGSS  
VPMSVTSQLIWREYFYCMSVNNPNYNRMFENPICLNIDWYSDDALLRKWKEGKTGYPWIDACMRQLVQEGWIH  
QVCRHAVACFLTRGYLWIDWQKGLETFDHYLDDADWSVCAGNWMWVSSSAFEKVLQCPRCICPVRYGKRMDPT

GTYVRRYVPELKNMPMNYLFEPWKAPESVQLEADCIIGTDYPSPMVDHRTASKECKEKMKEKVKGKYRDDTPHI  
APTNEDEVISLIWMRKQHGETQMC DHSDEKLT  
>Melibe\_leo\_AWY11210.1\_6-4\_photol  
MAHRSIHWFRKGLRLHDNPALLKA FEHASEVYPIFVLDPWFVSSPSCCKVGINRWRFLLEALKDLDDKLKALNL  
RLFVVRGSPDKELEKLCCKWNISRLTFEVDTEPYAVKRDEQVEAQMKNLGVEVIKCTSHTLFD TAKVVKTNGK  
EAPLSYRGFQTILSKLGAPPKPLDPPTKEDVKDCQTRISDTHDEDYGVPTLNELGKDAESCGPLLYPGGETEA  
LERMERHLKKT VQIYFS  
>Melibe\_leo\_AWY11213.1\_cry\_dash  
MFRSSVILQVFLKPLKVTGRLKMTARPSNVGIVLFRNDLRIHDNEAIFLANKNCSQVLPLYCFDPRHFQGT YH  
YNFPKTGSHRAKFLLECIADLKANLQRKGS DLVVR LGKPENVIPELMTNLNLGTD TMVVMQKEVTDEELKVEK  
ALKEKSKSKFETVWGHTLHHKEDLPFQIKHLPDVYTQFRKKVEGNTPIRKCFQLPDSLKPLPSNVEVGTIPTF  
QDLHLSEPGRNPNSAFPFSSGGESAALERLENYLWASDNVSTYKETRNGMIGAEYSTKFSSWLAHG CISPRKIY  
WEIQKYEQERTANQSTYWVIFELLWRDYFRLVAMKFGNQ LFFSSGIKGGHVQWKKNMLHFKAWQEGKTGV P YV  
DANMRELAASGFMSNRGRQNVASF LTKDLELDWRLGA EWFE SMLIDHDVCSNYGNWLYSAGIGNDPREN RKFN  
VVKQGLDYDQGGEYIRLWVPELKEVKDGRVHCIW TASKTILDSSGVSLGETYPYPIVMAPEWSRHVNRPGSSH  
SASGGGFSSGKGPRGGSARGRGGGRGRGHSDQSVGQKRGIDFYFKNSTPR  
>Melopsittacus\_undu\_XP\_030898891.1  
MLRRQRKRKASAP EEIPRVSRKRTEQEEELHEARRRAAPSVREFKF NKKRVRLISQASDLKDGGRCILYWMSR  
DQRLQDNWAFLYAQR LALKQELPLCVCFCLVPKFLEATIRHYGFMLRGLQEVAEECAELNIAFHLLRGYAKDV  
LP AFVEEHG VGGLVTD FSPLRLPWQWVQDVREWL PEDVPFAQVDAHNIVPCWVASPKQEYSAYTIRRKIQ AQL  
PEFLTEFPVVRHPYSPSCPAEPIAWEACYSSLEVDRTVKEVEWATPGTAAGLAVLQSFIRERLKYFGSHRND  
PNKAALS NLSPWFHFGQVSTQRAILEVQKHQHKYKESVDMFVEEAIVRRELAENFCY YNENYDSVQ GAYPWAQ  
TTLKLHAKDERPFLYK LQELEQGTTHDPLWNA AQLQMVREGKMHGFLRMYWAKKILEWTHSPEEALQFAIYLN  
DRYELDGRDPNGYVGCLWSICGIHDHG WTERAVFGKIRYMN YAGCKRKFDVRQFERRYAPCTLSQ  
>Melopsittacus\_undu\_XP\_030905675.2  
MSGSARTAI CLLRCDLRAHDNQVLHWAQSNAEFV VPLYCFDPRHYLR TYWYGFPKTGPYRLRFLLESVKDLRE  
TLKKKGSTLVVRKGKPEDVVDLITQLGSVS AVVFHEEATQEELDVENELCQVCSQHGVKVHTFWASTLYHRD  
DL PFRPIARLPDVYTHFRKAVESEAKVRPTLRMADQLQPLAPGVEEGCIPTMEDFGQKDPDTPRTAFPGSGG  
ETQALMRLQYYFWDTNLVASYKEVRNGLVGMDYSTKFAPWLALGCISPRYIYEQIKKYERERTANQSTYWVLF  
ELLWRDYFRFVALKYGRRI FSLRGLQSKEVPWKDLQLFN CWKEGKTGVPFVDANMRELAATGFMSNRGRQNV  
ASFLTKDLGLDWRMGA EWFEYLLVDYDVC SNYGNWLYSAGVGN DPRDNRKFN MVKQGLDYDGN GDYVRLWVPE  
LQGIKGADIHTPWALSSAALSQAGVTLGETYPQPIVTAVEWSRHISQRPGRSLHPRGSRRPAHSPVQHKDRGI  
DFYFSRKKDAR  
>Melopsittacus\_undu\_XP\_033918640.1  
MCN PRAHHGSAQGA IHNRFLLQCLEDLDANLRKLN SRLFVIRGQPADVF PRLFKEWNI AKLSIEYDSEFP GKE  
RDAAIKKLASEAGVEVIVRISHTLYDLDKI IELNGGQPP LTYKRQT LISRMEPLEMPVETITPEVMEKCTTP  
VSDDHDEKYGVPSLEELGFDTDGLPSAVWPGGETEALTRLERHLERKAWVANFERPRMNANSL LASPTGLSPY  
LRFGCLSCRLFYFKLTDLYKKVKKNSSPPLSLYGQLLWREFFYTAATNNPRFDKMEGNPICVQIPWDKNPEAL  
AKWAEGRTGFPWIDAIMTQLRQEGWIHHLARH AVACFLTRGDLWISWEEGMKVFEELLLDADWSVNAGSWMWL  
SCSSFFQQFFHCYCPVGFGRRTPNGDYIRRYLPVLRGFP AKYIYDPWNA PESIQKAAKCIIGVNYPKPMVN H  
AEASRLNIERMKQIYQQLSRYRGLGLLATVP SNPNNGNGGLMGYS PGESISGCSSAGGAQLGTGDGHTV VQP  
CALGDSHTAGASGIQQGYCQASSILHYAHGDNQQSHLLQAGRTAVGTGISAGKRPNPEEETQSVGPKVQRQS  
TN  
>Menidia\_meni\_CAG5853193.1  
MAQNCIHWFRKGLRLHDNPALVAALRDCKELYPVFILDPYHHDTHVGINRWRFLIGALTDL D HSLRKLNSRLF  
VVRGKPEDVFPKLFNKWNITKLT YEYDTEPSSSLTRDKKVTSLAKEHGV DVIYKISHTLYDIDRVIEENNGKPP  
LTYVRFQAVVKMLGAPKKPIPAPTMEDMKDVRTPCSEKHEKKYGIPTLEELGCVTSSLGEELFP GGECEALRR  
LDEHMKRKAWVCSFEKPQTSPNSLSPSTTVLSPYITFGCLSVRTFWWRLTEVYKGSKHSDPPVSLHGLLWRE  
FFYTASVGIPNFNKMEGNPVCTQIDWDKNSEYLTAWKEARTGF PFIDAIMTQLRQDGIHHLARH AVACFLTR  
GDLWISWEEGQRVFEELLLDGDWALNAGNWQWLSASTFFHQYFRVYSPIAFGKKT DKNGDYIKKYLPILKKFP  
AQYIYEPWKAPRSVQQAAGCIVGKDYPCPIVEHEVISKKNVQRMKESYAKRSSDGTESPKKKQGA KRQAPTVI  
EMLQKKAKRTKLVRNSSV  
>Menidia\_meni\_CAG5896000.1  
MSATR TIICLLRNDLRVHDS ELFHWAQRNAEHIVPLYCFDPRHYVGTYNYNVPKTGPFRLRFLLESVRDLRNT  
LLNKGSNLVVRGKPEEVVADLIKQLGSVSSVAFHEEVTSEELNVERKVKEVCAQLKVKVHTCWGSTLYHRDD  
LPFHMSRLPDVYTQFRKAVESQSRVRPVFPAP EKLNLPLPPGLEEGA IPTAEDLQQPEAAADPRSAFPCSGGE  
SQALARLKH YFWDTDAVASYKETRNLIGVDYSTKFSSWLA MG CISPRYIYHQIKQYEMERTANQSTYWVIFE  
LLWRDYFKFVGAKYGDRMFQIKGLQDKSVPWKMDKKLFD AWKEGRTGVPFVDANMRELAMTGFMSNRGRQNV A  
SFLTKDLGLDWRMGA EWFEYLLVDHDVCSNYGNWLYSAGIGNDPREN RKFNMIKQGLDYDSNGDYVRQWVPEL

KSIRGADVHTPWNLSATLMHAHVSLGETYPTPIVIAPEWSRHFNKKPSGTGPSRGKKGPSHTPKQHRDRGI  
DFYFSKSKNL

>Menidia\_meni\_\_CAG5896989.1

MTCAWTSSFIFCAPKRLWKLAIIRPKRPSSSLSLLFDSLVEAAMSGKKRKASTPAGGKDPGAKQPKLSSSSSS  
SEEEKPKRAAGWLQSLVEQQRAEKKEMKFNKKRQRIILTDAEKIKQGSEGVLYWMLRDQVRVDNWLIRAQQLA  
AKKELPLHVCFLDVPESLSTLRHYGFLLKGLEEVAKECKHLNMQFHLLRGAAGEALPGFVSDRSFGAVVTD  
FSPLREPLGWLKSVKKSPLPKDVPLIQVDAHNIVPCWVASPKLEYSARTIRGKITKLLPEFLTDLPLVERHPHT  
ATKGAKPVDWEETLESLOVDRTVAEPAWAEPGAKAGMAMLESFIDVRLKLFGTQRNDPNVAALSQSPWLRFG  
QISAQRVALQVQRCGKSASQSIPPFIEELVVRRELTDNFCFYNNKKYDSVEGAYEWAQKTLKDHAQDKREYIYT  
REQLEKAKTHDKLWNAQYQMVTEGKMHGFLRMWAKKILEWTPSPPEALSIALYLNDRYELDGDQDPNGFVGC  
MWSICGIHDQGAERPIFGKIRFMNYKGCLRKFNVAAQFEKKYYPKKA

>Menidia\_meni\_\_CAG5958100.1

MPPSTSGDQALVRGMLKEVLVVGREDPEGFFAICVSVLGHQETRSQFLSLIKPLSTANIRLHSALTSIYQGYFS  
EIEDDELEHALALSLEAKNQQLSTTSRESQPLHPGLNRSIQHNSPLKSQEKNSNRLLDGTGGEKSPSFAQTAT  
RHKVGSPQTTQKTELQKTELQKTSAGNYDDRSGLTGRTLCAPGSLSGGGQMTEEDLNQSEKPKRSKNRRQR  
RKRAGQQVIGLPCSPSAHAPVLLWFRDLRLCDNPALIGSLELGAPVIPVFIWSPDEEEGQGVTIAMGGACKY  
WLHQALSCFCTALEGIGSHLTFLAANTDGDVRGSSLLSLKQLVKETGARTVLANALYEPWLKERDDEVVSSLO  
KEGVECRMFSYCLRDPYSVSTEGVGLRGIGSVSHFMSCCRQNPSTVGTPLPPLPGSLPTPTLWPPQASLES  
GLARMPRRKDGITVDWAANIRKSWDFSEDGAHARLDAFLHDGVYRYEKESGRADAPNTSCLSPYLHFGQLSPR  
WLLWDAKGARCRPPKFQKRLAWRDLAYWQLTLFPLPWEESLRPPYKALRWSTDRSHLKAQWQKGTGYPLVDA  
MRQLWLTGWMNNYMRHVVASFLIAYLHLPWQEGYRWFQDTLVDADVAIDAMMWQNGGMCGLDHWNVFVMPVDA  
AMTCDPCGTYVRKWCPELADLPDELIIHKPWKCPASMLRRSGVAFGQTYPERIITDLEERSRSLQDVAVVRKE  
FGQYVDKRSGLDLVPLPPRLVSQALGLSHRDEAVTSNRKEFLLPVITRMEFKHQQEDPDADASSNPYNAVLKG  
YVSRKRDETI AFLNERDFTASVMYEGTQRQERLERDHRRIEGLPPSPSPRGRARRPTAKDRFSIVPGGAVTA  
LK

>Menidia\_meni\_\_CAG5958302.1

MVVNTIHWFRKGLRLHDNPRLRDSIRGADSLRCIYILDPWFAGSSNVGINRWRFLQCLEDLASLRKLNRL  
FVIRGQPTDVFPRFLFKWKITRLSYEQDSEFPFGKERDAAIQLKASEAGVEVIVRISHTLYDLDRILNAGQP  
PLTYKRFLTITRMDAVALPETITSEIIQNCVTPTRDDHDKFGVPSLEELGFETEGSLTAVWPGGETEALM  
RLERHLERKAWVANFERPRMNANSLASPTGLSPYLRFGCLSCRLFYFKLTDLYRKVKKNSSPSLSLYGQLLW  
REFFYTATNNPCFDKMEGNPVCVQIPWDWNPEALAKWAEGRGTGFPWIDAIMTQLRQEGWIHHLARHAVACFV  
TRGDLWISWEEGMKVFEELLLDADWSVNAGSWMWLSCSSFFQQFFHCYCPVGFGRRTDPNGDYIRRYLPVLRG  
FPAKYIYDPWNAPEEVQKAAKCMIGVHYPKPMVNAHETSRIINIERMKQIYQQLSCYRGLGLLASVPSNPSSGA  
NGPRSGTARDPEGSSDPSLQEGTSPTERGQFTQKRRHEDAPSASSSSKSLKQSK

>Mercenaria\_merc\_\_XP\_045159044.1

MDNTVDVDNITDFKSGNLSADECFMILSLIGYDAAKTHFLAHVETLRKEQPKLHNQLFNVYRGYFECLDEC  
FNLDPKLDSCSVENGFIATDSSSENQDIGFDLDLEMAKLSLESVADTPSYASKLMSSHTVNGVSDKCHEPERVR  
KMTFSFTDNMSCEKKAIAATQSLDTSSTHTESSQSKKKKKNRKSRRVDRPLSNAPLIYWFRDLRLYDNPALE  
FAALSGAPVLPIFLWSDAEEGPTKAFANGGATKYWLHMAALPTLNRMIERYNPIIFRKSTDYLTDIVDIIKQ  
SGAKTLVMNDVYEPYKERDDKICKVLRNKGVKCERFHSYLLHQPGAVKTESLCMRGMGSVTHFMECCRQSDP  
EPLGVPVDPNIPVGTDRPESVPVSELGLGLRPLKRKDGTEIDWARVIRESWDFSENGAWALQLFLNEGIRN  
YEKESSRGDKLNTCRISPYLHFGQISPRTVLNEGRLKSPKFLRKLAWRDLSYWLLSVFPDLPYAPTRPQYQH  
QRWSDNKIHLKAWQKGTGYPLVDASMRQLWLTGWMNNYMRHVVASFLISYLHITWVEGYLWFQDTLLDADVA  
INAMMWQNGGMSGLDQWNFVMPVDAAMTCDPKGDYVRKWIPELARMPEEFHFKPWKCPPSILRRAGVELGVT  
YPHRIITNLEEAREQSLRDVVDVRQKFEGLIDPRTGNDLVQLPNGVLIPIVITRKEFKYKTRNPESRDNPASV  
LRGYRSRKRDELVEYLNQRDFMASTMKECSMRHDRGLKASQSGSFY

>Mercenaria\_merc\_\_XP\_045167514.1

MSSKGRIVICMLRDLRFHDNEVLAWANKNGNYLLPVYCFDPRHYGGTYKFGFPKTPHRLKFLLESVKDLRN  
TLKSHGSGLVVRNGKPEVVIPELIQKLGNDAVHAFHEEVTQEELDVERALKLQCENKVIQKIWGHTLFRD  
DLPFSSVKQLPDVYTQFRKRVEGSCVTRQCIEMSEQLNPLPEGIEEGEIPSMQQLGIQGTSLXLLXAPDSRTSF  
PFSGGETSGLERVRHFLWETDAVATYKETRNGMIGAEYSTKFSAWLAHGCISPRYIYIEIKRYEQERVANNST  
YWVIFELLWRDYFRYVALKYGNKLFYLSGIQGHLPWKDKELFRAWKEGRTGVVVDANMREVAATGFMSNR  
GRQNVASFLLTKDLKLDWRLGAEFESMLIDHDVCSNYGNWLYSAGLGNDPREDRKNMVKQGLDYDPEGDYVR  
LWVPELKNVSGGNVHTVWMTSNALSRADVSLGETYPNPVTIAPEWSRHYGKSGGASARGGARGGGGGHGGQ  
GGRHGSAGQKRGIDFYFKGS

>Mercenaria\_merc\_\_XP\_045176200.1

MQVTSLLNGLAICSLLRNRIWTGFGQEQISSLIEMTHRSIHWFRKGLRLHDNPALLEACKNASHVWPVFMVDP  
WFAETARVGVNRWRFLQLTLQNLDDNLKKINSRLFVVRGNPDIFFPKLFKEWGITKITYEVDTEPYAIERDSV  
IDGLAKDSGIEVMRCVSHTLYDTERTISKNGSPPLTYQRQFQTLMSQMGDPVKPVTVPDDLIKCKTPVDKDY  
EKKYGVPTLEELGKSAKDCGPCLFPGGETEALERLDSLLKKTNNWVCNFEKPKTEPNTLEPSTTVLSPYLKFGC

LSARMFYHRVNEVYKGGKHSQPPTSLLGQVMWREFYYTVAVGTPNFDKMVGNSVCTQVDWDTNPEFLEAWKMG  
RTGYPFIDAVMTQLREEGWIIHHLGRHAVACFLTRGDLWISWEEGMNVFEEYLLDADWSLNAGNWMWLSASAFF  
HQYFRVYSPVAFGKKTDKNGDYIRKYIPKLAKFPEKYIYEPWNAKAVQEKCGCVIGKDYPKPIVDHADVARKT  
NISRMAAAYARRKAGKESNGAASTPATKKRKAESDASGAKKKSKNKEITDFLKK

>Mercenaria\_merc\_\_XP\_045196489.1

MEESAISMPPASTAVENSCHPASIHWFHGLRLHDNPALLEALELGGDFYPIFIFDGEVAGTKTAAYNMRMFL  
LESLEDLDESLLKKYGGRLFVFHGDVEILSGLFNEWSVEKLTFEQDPEPVWTARDNAVKKLCQDTGVEFVEKI  
SHTLWDPKVIIEENGGCPPLTYMLFNQVATMVGDPFRPSVEPDTKVSMPVSGDHDKKFGVPMSMDKFGISPEC  
EEQNDRINSWKGETQALRLFAHRLQVEEIAFSCGNVMPNQSFDPDLVGPPLSMSAHLRFGLSIRKLYWALRD  
AYTRVNLDPFTISVVGQLMWREYFYTMSVNNINYNKMEGNPICLNVPWYKDDDEKLKKWENGETGYPWIDAIM  
KQLKHEGWIIHVGRHAVSTFLTRGDLWINWEEGLKVFDKYLLDADWSVCAGNWMWMSSAFEKVLSCPCKFCF  
VRYGRKMDPNGEYIKRYLPVLKDMPTRYLYEPWKAPKAVQKKANCIIGVDYPLPIVEHNKASKECYNMMMEVK  
NKLQQGKGMEHCRPTNMEEVRMFVWMPGHHKGVCDDREVPLDEKDLCDGLTGM

>Mercenaria\_merc\_\_XP\_045198496.1

MSSNQEGFIADKVKKAERKEVSPHDETAWSVLIRDAQIKLIEQARPVYERLVSQFSNAGRYWKIYIEHELKS  
KNYERVEKLFQRCLIKILNIDLWKLYISYIKDTGKGLPSYREKMAQAYDFALDKMGMDIMSHSIWHDYITFLK  
SVDAVGSYAENQRITAVRKVFQRGVNPMINIEALWKDYGTYSINPLIAKKMIEDRGRDYMNARRVSKEYE  
VVTRGLNRNLPSVHPTNSPEEATQVELWKYIAWEKSNNPLRTEDQALITKRVMFAYEQSLLCLAYHPDVWIEA  
ANYLEQSSKILTEKGDQNAKMFADAAALFERAITTTMKANMLIYFTYADFEESRMKYEKVHSIYKRCVAVE  
SIDPSLVYIQYMKFARRAEGIKSARQVFKLAREDKRSTYHVFVAAALMEYYCSKEKTVALKIFELGLKKFGDV  
PDYIRAYVDFMSHLNEDNNTRVLFERVLSSGQIPPEKSISFTLDIKGEIPVLENGLDTPVKMDAGTLLSLEYA  
SGRKRRITENEGSDDDEDINTGPAPPSRDFASNFIIIDNVFSRNDGGLIKLIKHIRMDVTTKQPKRRVLHWFRK  
GLRLHDNPALRAALEGAQTYRCVYILDPWFAGVSQVGVNRWRFLQCLEDLSSLRKLNRLYVVRGQPAEVF  
PRLFKERNITVLSFEADPEPFGKNRDAAITAMAKEVGVVEVVRSSHTLYDLQRIIAENNGIPLTFKRQFQVVL  
SRMSLPDKPEERITFETIGEAKTPITLDHDEQYGVPSLEELGFDTAELNSKVFRGGETEALQRLHRHLERKAW  
VASFEKPKMTSQSLFSPQTTLSPYLRFGCISARLFYWKQLQELYRKIKKDCDPPLSLHGLLWREFFFYTAATDN  
PNFDRMSGNSICVQVPWDKNPEALAKWAEPGCLKMSI

>Mercenaria\_merc\_\_XP\_045202658.1

MKFQGLRSIRLVINCRHIIIESVIHPCANFSNTAYRLRYSPVLLPRYLSTMSGSESQKKRLEADDKNSCKENG  
EPDVKKPSVEDFQLKIIESRKSVCKSVAEFKFNKKRVVLSKAQDFPEDSNGVLYWMSRDQRVQDNWAFLYAQ  
KLALKLEVPLHVCFLVPKFLEATIRHFTFMLEGLKEVEKECKELGISFHLLIGHAKDVLPSFLTEHSIGGLV  
TDFSPLRVPRGWVEEVVKVLPKDIAFCQVDAHNLPVCWEASPKLEYGARTIRNKIHNQLSGFLTEYPPVCKHK  
YRPKLESKPIDWDSAYASLEVNQIVGPVDWAKPGTSAGLQMLESFCKERLRYFGSERNNPNKNALSNLSPWIIH  
FGKISDSADTKIFSGAYDWAKQTLKAHEKDKREYVYSREKLEQGKTHDPLWNAQAQNMVNEGKMHGFMRMWYA  
KKILEWTSSPSEALEIAIYLNDKYSLDGRDPNGYVGCMSWICGIHDQGWKEREVFGKIRYMNYNGCKRKFDVG  
KYEAKHRRQTIK

>Merops\_nubi\_\_KFQ18699.1

RFLQCLELDLDANLRKLNRLFVIRGQPADVFPRLFKERNIAKLSIEYDSEFPGKERDAAIKKLASEAGVEVI  
VRISHTLYDLDKIIELNGGQPLTYKRFQTLISRMPELEMPVETITPEVMEKCVTPVSEDHDEKYGVPSLEEL  
GFDTDGLPSAVWPGGETEALTRLERHLERKAWVANFERPRMNANSLASPTGLSPYLRFGLSCRLFYFKLTD  
LYKKVKKNSSPPLSLYGQLLWREFFFYTAATNNPRFDKMEGNPICVQIPWDKNPEALAKWAEGRTGFPWIDAIM  
TQLRQEGWIIHHLARHAVACFLTRGDLWISWEEGMKVFEELLDADWSVNAGSWMWLSCSSFFQOFFHCYCPVG  
FGRRTDPNGDYIRRYLPVLRGFPKAYIYDPWNAPEVQKAAKCIIGVNYPKPMVNHAASRLNIERMKQIYQQ  
LSRYRGLGLLATVPSPNPNNGNGGLMGYSPPGESISGCGSTGGAQLGTGDGHTVVQPICALGESQTGASGIQQQ  
YQCASSILHYAHGDNQQSHLLQAGRTALGTGISAGKRNPEEETQSVGPKVQRQSTN

>Merops\_nubi\_\_XP\_008939625.1

NLVASYKETRNLVGVYDSTKFAPWLALGCI SPRYIYQQIQKYEKERTANQSTYWVLFELLWRDYFRFVALKY  
GRRIFSSGGLQSKEVSWKKDLQLFDCWKEGRTGVFPVDASLRELAATGFLSNRGRQNVASFLTDLGLDWRMG  
AEWFQYLLVDYDVCSNYGNWLYSAGVGNPDREDKRFNVIKQGLDYDSNGDYVRLWVPELGGIQGAEVHAPWAL  
DSAALSQAGVALGETYPRPVVTAPEWSRHISQRPQGRSPRGRGRRGPAHAPVRHRDRGMEFYFSGKAA

>Merops\_nubi\_\_XP\_008939780.1

VFDELLLDADFSVNAGSWMWLSCSAFFQQOFFHCYCPVGFGRRTDPSGDYVKRYLPKLKGFPSRYIYEPWNAPE  
SVQKAAKCIIGVDYPKPMVNHAETSRLNIERMKQIYQQLSRYRGLCLLASVPSCVEDFSGPVTDASAGQGCST  
STAVRLSQAEQASPKRKHDGAELCSEDLYKRAKVTGLPAAEVPGKSL

>Merops\_nubi\_\_XP\_008942592.1

RKEEEEVQEARRAAPSQEFKYNNKKRVRLVSQGSDDLKDDARCILYWMSRDQRVQDNWAFLYAQRALALKQEL  
PLHVCFLVPKFLDATIRHYSFMLRGLQEVAEECAELNIPFHLLGYAKDVLPAFVVEHGVGGLVTDFCPLRL  
PRQWVEDVKEQLPEDVPFAQVDAHNIVPCWVTSQKQEYSARTIRAKIHAQLPEFLTEFPPIRHPYSPSSPAE  
PIAWEACYSSLQVDRSVKEVEWATPGTAAGLAVLRSFLTERLKSFSHRNDPNKAALSNLSPWFHFGQVSTQR  
AILEVQKHRGKYKESVDADFVEEAVVRRELADNFCYYNENYDSVQAYDWAQTTLKLHAKDKRPFLYELQELEQ

GTTHDPLWNAQQLQMVLEGKMHGFLRMYWAKKILEWTRSPPEALRFAIYLNDRYELDGRDPNGYVGCLWSICG  
VHDQGWAERAVFGKIRYMNYAGCKRKFDVGQFERRYAPRPLSP  
>Merops\_nubi\_\_XP\_008947701.1  
MSHHTIHLFRKGLRLHDNP TLAALESSEVVYPVYILDRKFMTSMVHIGTLRWHFLLQSLEDLQKNLTQLGSC  
LLVIQGEYESVLREHVQKWNITQVTLD AEVEPFYKEMEAKIQQLGEELGFEVLSLVSHSLYDTRKILELNGGT  
PPLTYKRFLHILSLLDGPEVPVRNLTAEDFQRGGAPEPLAEQYKVPLPVDLEIPLESLS PWRGGETEGLQRL  
EQHLTDQGWVTSFTKPRTIPNSLLPSTTGLSPYFSMGCLSARTFFYRLSTIYAQAKHHS LPPVSLQGQLLWRE  
FFYTVASATPNFTQMAGNPICLQIRWYEDAERLHKWKT  
>Mesocentrotus\_fra\_ACO51512.1\_photolyase  
LALKQEVPLHVCFLVPRFLEGTIRHFN FVLEGLKEVSQELHLLDIPFHLLIGYAKDVLPGFINDHGLGGVVT  
DFSPLRTSRQWIKDVKEELPKNIPFCQVDAHN VVPCWEASNKLEYGARTIRPKITKQLTTYLT EFPVICHPH  
KAKAKAEPIDWEGAYASLEVDQTVK PVDWAQPGTSEGKMLDSFVKERLRYFSSARNDPTKSVCSNLSPWIHF  
GQLSSQRAALIVRLYRSRFSESVAGYIEESITRRELSDNFCFYNDNYDSIEGTNDWAKKTLKD HAKDKREYVY  
SRETLEAKTHDQLWNSAQKQMVREGKMHGFLRMYWAKKILEWTTSPPEALEIAIYLNDRYSLDGRDPNGYVG  
CK  
>Mesocestoides\_cor\_VDD77140.1\_unnamed\_pr  
MPSKLRPDGDSFIKWLKQINKSRFEHGDN WLLFAQRIALKFSVPLHVCFNVASSVALRTRRHLN FLLEGLAE  
DCKDLAISFHLLPLEAKSKTSLKRNADGSFACNETDHATLQPLVDFLKQRNACAVITDFSPLRDDRQAVEFV  
SKRLPVD AHNVPAPWAFASDKVEYAARTIRKKLHDKARHLLTEFPPIRHPVTAKSVRERLLLQWAE PVDWVSV  
KESLKELVDERVGEVNWAKGGS LAGFSQLYSFLHHR LHAYATGRNDPTKDALS NLSPWLHFGHISAQRCLWEA  
KRLRTSHPQSVDAFIEEAFVRRELSDNFCLYNPHYDSIQGAWSWARETLKKHAGDARTPTYSSKAMEKAETGD  
ELWNAAQ RQLVQEGKLHGFLRMYWAKKILEWHDGGPEEALQLGFR LNDLYSLDGTDPNGYVGVMWSICGVHDQ  
GWVERPIFGKIRYMNFAGCKRKFDVAAFIRRYPPKREPSSCK  
>Mesocricetus\_aura\_\_XP\_005064953.1  
MAAAAVVAATVPALTMGADGASSVHWFRKGLRLHDNPALLAAVRGARCVRVCVYILDPWF AASSSVGINRWRFL  
LQSLEDLDTSLRKLNSRLFVV RGQPADVFPRLFKEGWTRLTFEYDSEPF GKERDAAIMKMAKEAGVEVV TEN  
SHTLYDLDRIIELNGQKPPLTYKR FQALISRMELPKPKPGAVTSQQMETCRAEIQENHDDTYGVP SLEELGFP  
TEGLGPAVWQGGETEALARLDKHLERKAWVANYERPRMNANSL LASPTGLSPYLRFGCLSCRLFY YRLWDLYK  
KVKRNSTPPLSLFGQLLWREFFYTAATNNPRFDRMEGNPICIQIPWDRNPEALAKWAEKGTGFPWIDAIMTQL  
RQEGWIHHLARHAVACFLTRGDLWVSWESGVRVFD ELLLDADFSVNAGSMMWLSCSAFFQQFFHCYCPVGFGFR  
RTDPSGDYIRRYLPKLKGFP SRYIYEPWNAPESVQKAACIIIGVDYPRPIVNHAE TSRLNIERMKQIYQQLSR  
YRGLCLLASVPSCVEDLSHPVAEPSSSQAGSISNTGPRPPSSGPASPKRKLEAAE EPPGEELSKRARVTAMSA  
QEPQTKDV  
>Mesocricetus\_aura\_\_XP\_040611116.1  
MGVNAVHWFRLKGLRLHDNPALKECIQGADTIRCVYILDPWFAGSSNVGINRWRFL LQCLEDLDSNL RKLNSRL  
FVIRGQPADVFPRLFKEWNITKLSIEYDSEPF GKERDAAIRKLATEAGVEVIVRISHTLYDLDKI IELNGGQP  
PLTYKR FQTLVSKMEPLEMPAETITSDVIGKCMTP LSDDHDEKYGVPSLEELGFDTDGLSSAVWPGGETEALT  
RLERHLERKAWVANFERPRMNANSL LASPTGLSPYLRFGCLSCRLFYFKLTDLYKKVKKNSSPPLSLY GQLLW  
REFFYTAATNNPRFDKMEGNPICVQIPW DKNPEALAKWAEGR TGFPWIDAIMTQLRQEGWIHHLARHAVACFL  
TRGDLWISWEEGMKVFEELLLDADWSINAGSMMWLSCSSFFQQFFHCYCPVGFGRRTPNGDYIRRYLPVLRG  
FPAKYIYDPWNAPEGIQKVAKCLIGVNYPKPMVNHA EASRLNIERMKQIYQQLSRYRGLGLLASVP SNPNNG  
GLMGYAPGENVPSCSSGGSCSQSGSILHYAHGDSQQAHLLKPRSSMGTGLSSGKRPSQEESQS VGPVKVQRQ  
SSN  
>Methanosarcinales\_arc\_NYT01758.1\_photolyase  
MNLKRVKVLREGSAKAGPVIYWMSRDQVRD NWALIYAQSVALKRAVPLAVIFSLALRFLGATWRQYSFMLS G  
LSLVERQLQELNIPFHLLSGKPAEVVPDFLMEEGAGVLVTD FDFPLREKRSWKAAVARKTTIPFYEVD AHNIVP  
CWQASPKQEYAAYTIRPKIGRALAEYLED FPALERHPRTGEEGAGGGGNDWDGARLLESEGRVPPVRWLS PG  
EDAAWSC LQDFVNNRLDSYPEARNDP SVDGQSNLSPYLHFGQLSAQRVALEVQSRARPE SRAAFLEELIVRR  
ELSDNFCFYNPHYDGFGFPTWARETLDEHRDDAREYIYTSQELEEARTHDDIWNAAQMEMVRRGKM HGYL RM  
YWCKKILEWSE SPEVAQKTAIGLNDRYELDGRDPNGYVGVAWSVGGVHDRAWGERNIFGKIRYMSYKGIKSKF  
DIQSYISRISLPE  
>Methanosarcina\_maz\_WP\_048036566.1\_photolyase  
MNPKRIRALKSGKHGDGPVYVWMSRDQVR EDNWALLFSRAIAKEANVPVMVVFCLTGEFLEAGIRQYEFMLKG  
LQELEVSLSRKKIPFFFLRGDPGEKISR FVKDYNAGTLVTD FDFPLRIKNQWIEKVISGISIPFFEVD AHNIVP  
CWEASQKHEYAAHTFRPKLYALLPEFLEE FPELEPN SVTSELSAGAGMVETLSDVLETGVKALLPERALLKNK  
DPLFEPWHFEPGEKAAKVMESFIADRLDSYGALRNDPTKNMLS NLSPYLHFGQISSQRVVLEVEKAESNPGS  
KKAFLDEILIWKEISDNFCYYPNGYDG FESFSPWAKESLNAHRNDVRSHIYTLEEF EAGKTHDPLWNASQ MEL  
LSTGKM HGYMRMYWAKKILEWSE SPEKALEIAICLNDRYELDGRDPNGYAGIAWSIGGVHDRAWGERGVTGKI  
RYMSYEGCKRKFDVKLYIEKYSAL  
>Methanothermobacter\_the\_WP\_010876537.1\_photolyase

MIHAERIRNLNGEEPDLRGSYVVYWMQASVRSHWNHALEYAIETANSLKKPLIVVFGLTDDFPNANSRHYRFL  
IEGLRDVRSNLRERGIQLVVERDSPPSVLLKYADDAAAAVTDRGYLDIQKEWVDEAAGALHIPLTQVESNVIV  
PVETASDKEEYSAGTFKPKIKRHLKRFMVPLRMRTLKMDSLDLEPGPEFEDAVRDFRAPEDLEPSVFRGGTST  
ALSIFSEFLREKLECFERYRNDPVKNCLSNMSPYLHFGQISPLYLALRASEAGECPEFLEELIVRRELSMNFV  
HYSDSYSSISCLPEWAQRTLMDHVADPREYEYSLRELESASTHDPYWNAAQQEMVITGKMHGYMRMYWGKKIL  
EWTDHPARAYDIALYLNDRYEIDGRDPNGFAGVAWCFGKHDRWAEREIFGKVRYMNDRGLKRKFRIDEYVDR  
IRGLMDE

>Microcaecilia\_unicolor\_XP\_030056693.1\_cryptocho

MVVNSVHWFRKGLRLHDNPALQAALRGAQTVRCIYILDPWFFAASSSVGIIRWRFLQLSLEDLDNRLRKLNSRL  
FVVRGQPADVFPRLFKWGVNRLTFEYDSEPFGKERDAAIMKMAKESGVEVIVENSHTLYDLDRIDELNGQKP  
PLTYKRFQAIISRMELPRKPVCSITQQQMETCRADIQENHDDTYGVPSLEELGFCFTEGLGPAVWCGGETEALA  
RLDKHLERKAWVANYERPRMNANSLLASPTGLSPYLRFGCLSCRLFYRRLRDLYKKVKRNNLPPLSLYGQLLW  
REFFYTAATNNPKFDRMEGNPICVQIPWDKNPEALAKWAECKTGFPWIDAIMTQLRQEGWIHHLARHAVACFL  
TRGDLWNSWESGVKVFDELLLDADFSVNAGSWMWLSCSAFFQQFFHCYCPVGFGRRTDPSGDYVRRYLPKLKA  
YPSRYIYEPWNAPESVQKAAKCIYGVDPKPIVNHAEASRLNIERMKQVYQQLSRYRGLCMLASVPSCSEDLS  
NPLADPASGGQYKTGTGEKSTYKVHRYNSLELQEKDTQIQRDCLKVDS

>Microcaecilia\_uni\_XP\_030070014.1\_cry-1

MGVNAVHWFRLKGLRLHDNPALRECIQGADTVRCVYILDPWFAGSSNVGINRWRFLQLCLEDLDANLRKLNSRL  
FVIRGQPADVFPRLFKWVKIAKLSIEYDSEPFGKDRDAAIKKLASEAGVEVIVRISHTLYDLDKIDELNGGQP  
PLTYKRFQTLISRMELPEMPVETITSEVMETCTTPVSDDHDEKYGVPSLEELGFDTEGLLSAVWPGGETEALT  
RLERHLERKAWVANFERPRMNANSLLASPTGLSPYLRFGCLSCRLFYFKLTDLYKKVKKNSSPPLSLYGQLLW  
REFFYTTATNNPRFDKMEGNPICVQIPWDKNPEALAKWAEGRTGFPWIDAIMTQLRQEGWIHHLARHAVACFL  
TRGDLWISWEEGMKVFEELLLDADWSVNAGSWMWLSCSSFFQQFFHCYCPVGFGRRTDPNGDYIRRYLPVLRG  
FPSKYIYDPWNAPEPDSVQKGAACIIGINYPKPMVNHAASRLNIERMKQIYQQLSRYRGLGLLASVPSNPNGNG  
NGGLMSYSPGESTTTGAQMGGTDGHATGIQTVSQVEPNTGSSGIQHOGYCGQSSSLHYAHGDSQQNHLLQGKST  
LNTGVISGKRPNPEEEKQSIGPKVQRQSTV

>Microcebus\_muri\_XP\_012628233.1

MGVNAVHWFRLKGLRLHDNPALKECIQGADTIRCVYILDPWFAGSSNVGINRWRFLQLCLEDLDANLRKLNSRL  
FVIRGQPADVFPRLFKWVNIKLSIEYDSEPFGKERDAAIKKLATEAGVEVIVRISHTLYDLDKIDELNGGQP  
PLTYKRFQTLISKMEPLEIPVETITSEVIEKCTTPLSDDHDEKYGVPSLEELGFDTDGLSSAVWPGGETEALT  
RLERHLERKAWVANFERPRMNANSLLASPTGLSPYLRFGCLSCRLFYFKLTDLYKKVKKNSSPPLSLYGQLLW  
REFFYTAATNNPRFDKMEGNPICVQIPWDKNPEALAKWAEGRTGFPWIDAIMTQLRQEGWIHHLARHAVACFL  
TRGDLWISWEEGMKVFEELLLDADWSINAGSWMWLSCSSFFQQFFHCYCPASFGRRTPNGDYIRRYLPVLRG  
FPAKYIYDPWNAPEGIQKVAKCLIGVNPYKPMVNHAASRLNIERMKQIYQQLSRYRGLGLLASVPSNPNGNG  
GFMEYSPAENIPGCSSSGNCSQGSGLHYAHGDSQQTHLLKQGRSSMGTGFSGGKRPSQEEDTQSIGSKVQRQ  
STN

>Microcebus\_muri\_XP\_012645570.1

MKKARAKDHIWFLQLSLEDLDTSLRKLNSRLFVVRGQPADVFPRLFKWGVTRLTFEYDSEPFGKERDAAIMK  
MAKEAGVEVVTENSHTLYDLDRIDELNGQKPPLTYKRFQAIISRMELPKKPVGSVTSQQMESCRAEIQENHDE  
TYGVPSLEELGFPTTEGLGPAVWQGGETEALARLDKHLERKAWVANYERPRMNANSLLASPTGLSPYLRFGCLS  
CRLFYRRLWDLYKKVKRNSTPPLSLFGQLLWREFFYTAATNNPRFDRMEGNPICVQIPWDRNPEALAKWAEKG  
TGFPWIDAIMTQLRQEGWIHHLARHAVACFLTRGDLWVSWESGVRVFDLDDADFSVNSGSMWLSCSAFFQ  
QFFHCYCPVGFGRRTDPSGDYIRRYLPKLKGFPSPRYIYEPWNAPESIQKAAKCIIGVDYPRPIVNHAEASRLN  
IERMKQIYQQLSRYRGLCLLASVPSCVEDLNHPVAEPSSSQAGSMSSTGPRPLPSGPASPGRKLEAAEPPGE  
ELSKRARVTELPTPELPSKDA

>Micromonas\_comm\_XP\_002508013.1

VVWFRQDLRVRDNPALHAAARTGRPVVACFVWCPEKEGGWPMGGATRYWLHHALGSLQASLRARNAGGTSSPS  
SSSSSSSFDELAADVRECGAKDVYCNRVYEPWKIARDRECEKFSaelNVRFRSFNAGVLYEPWDARPDATD  
DACWNSGYGSRVFFLRGCARLGEPPPPLPPPPTMRVRLPADKRARSYTEHGGVQSNPGNGQSNQSNAPKAST  
ERFRADVRTTARISPYVRHGELSVREYVHSAKAIQVGSRKSRARSAAVFLRRLAWRDLAYWSLWRFPRLCDEP  
LRPQYATQWWALPQWDPVAWQFGQTGYPLVDAGMRELWATGYVPNYVRHVAGFLIEYLNVDWRHGQLWFHDTL  
VDADVAIQGFWMQNGGHSMDQWNFMHPVYAAKSADPDGEYVRRWCPELSGLPREYVHCPWEAPATTLAAAN  
VALGRHYPKRIV

>Micromonas\_com\_XP\_002507183.1\_protein

MNRLVNEKRVRLKEGKVGTPVIYWCSDQRVRDNPALYACETANETGAPVVVFSLVTRFLGAGARQFCF  
MLKGLREMEQALLAKNIKFVLLLEGDPSTVPRFAKECGASLIVADQSPLRLGRTWRVAIASSVDCPLHEVDAH  
NVVPVWEASQKLEVGARTLRGKLAKLYPEFLVEFPETPVVKETWPCAAAAALPTIGIDWEALIVRARNDGAAV  
PEVTWAVPGEFAAHATLEHFLTRRLKYEHRNDPAKPQALSGLSPYLHFGQISAQRCALEARRYAKSSNKAVD  
VFLEELIVRRELADNFCWYSPKYDTIEGQKYEWAKETVREHSKDKRAYLYSLQQFENGETHDDLWNAQLEMV  
HGGKMHGFMRMYWAKKIMEWTESPDQALEFAIHLNDKYQLDGRDPSTGYVGCWMSIVGVHDQGWSERPVIFGKIR

YMAISGCVKKFKVQDYIKRVDELVTAVKAGEKDTAVVNPGRFHIEVSRSLDCDSLAVTGSRVCSEDELQRFVR  
VASANARSDTTRSLEALRALKSVDITAETLIKTVGKELKKLSKQRENPSVSSAAAAIVQAWQKLLLP  
>Micromonas\_com\_XP\_002508365.1\_protein,\_p  
RVVVWFRNDLRLQDNYAVKQAESIATR TAGCDVLP LYVFDPRTFAPSSWGS PKCGHRGRFQLESVLNLKRNL  
RAIGSDLLVAVGKPEEVI PKYLLDAPGAKNEEVCSEELRVD AKVKS AVKSAGNLNR LDKIWGSTLYHKDDL PF  
RSDASDLPDVFT PFRNKVESKSEPREPVPPP AKGALPVPSDMTEAFAFEPTVADLPFANEDERAIAAAGAHPD  
GVL PFEGGESAAALARVRYVWESEKIATYFETRNGMLGGDYSSKLAPWLAHGCVSPRQVVAEVRKFESQRVEN  
KSTYWLIFELIWRDFFKFFALKHGNAIFFSEGTAGGKMGAGYKGGAGPWRDDPAALAAWKEGKTGYPLVDAN  
MRELAATGFMSNRGRQNVASWLALDAGVDWR LGAEFWENKLLDYDCSANWGNWVAAAGMTGGRV NKFNIAKQT  
KDYDPEGEYIKYWVPELRKVP AKYIAEPRQMPGDVAQ SAGCVIGVDYPAP  
>Micromonas\_com\_XP\_002508785.1\_protein  
MAAKRTILWFRKGLRVHDNPALVKACEGASAVQPVFVLDPWF IKPERV GANRLRFLLES LTDL DASLRARGSS  
LLVLHGD PARVIPA ALEAWRC DRLCYEFDTEPYAQKR DASVNEAARALGVEVHAPVSH TLWDLDRLLAKCPRG  
EPPTAYASFLKIAHG VGVPVPVAPDVPSITPLSDGDALSDGKDLVDALRDVVTGSGIPSLERLGYEPIKAGEG  
FPARGGETEGLARLRKMLARTTYIAEFKKPQTNPTELWTPVLGKEGKVKGAPPANPF EA AKKSKEPKSTQLA  
EAFMAPATTALSPYLKFGCVSPRTFWHELRAVLDELGGKHSKPPE SLEGQLLWREFYYLAGYGT PNYDRMAG  
NRICRQIPWTWDEERLAAWEESRTGFPWIDACMMQLKQEGWMHHLARH AVACFLTRGDLFVHWEAGAAVFDRE  
LVDADWALNNGNWMWLS CSCFFYQYFRVYGPVSFGKKYDKEGAYIRKYL PQLKDMPAKYIYEPWTAPIEVQRK  
AGCVVGVDYPAPIVDHAVASKECIEKIAAAYNAHKNGTAGSIVAAGKKRKAGDGV  
>Micropterus\_dolo\_XP\_045889012.1  
MLVLLVNLEGERASGGSYPTLPQPLFTGMGHTCIHWFRKGLRLHDNPALMAALRD CRELYPVFILD PYLHNN  
TCMGINRWRFLIGALKDLDCSLRKHNSRLFVVGRKPEDVLLKLF SKWKVTKLTYEYDTEPYSLSRDKTVTALA  
KEHGLEVIYKISHTLYDIDRIIEENNGKPPITYNRMQAI VKTLGPPKRPI PAPT MEDMKDVKT PCSENHEKEY  
GIPTLEELSQGTAAALREEQFP GGQEALRRLDEHMKRTEWVCSFEKPQTS PNSLSPSTTVLSPYVTFGCLSAR  
TFWWRLTDVYHGKKHSAPPVSLHGQLLWREFFYTASVGI PNFNKMEGNPVCTQVDWDTNPEHLAAWTEARTGF  
PFIDAIMTQLRQEGWIHHLARH AVACFLTRGDLWISWEEGQKVFEKLLLDGDWALNAGNWQWLSASTFFHQFF  
RVYSPVAFGKKTDKNGDYIKKYLPLLKKFPAAYIYEPWKAPRNIQQEAGCIVGKDYPHPIAQHEVISKKNIQR  
MKLAYAKRSADPAESPRKNQGVKRKTPSVVDMLKKKQRRK  
>Micropterus\_dolo\_XP\_045892992.1  
MGVNTIHWFRKGLRFHDNP SLRDSIRGADTLRCIYILDPWFAGSSNVGINRWRFL LH CLEDLDASLRKLNSRL  
FVIRGQPTDVFPRLFKEWQISRLSYEYDSEFPFGKERDAAIQKLASEAGVEVMVRISHTLYDLAKI IELNDGQP  
PLTYKRQFQALINRMDAVELPAETITPEVVKKCATPTSDDHDDKFGVPSLEELGFETEGLT TAVWPGETEALM  
RLERHLERKAWVANFERPRMNANSLASPTGLSPYLRFGCLSCRLFYFKLTDLYRKVKKNGTPPLSLYGQLLW  
REFFYATATNNPCFDKMEGNPVCVQIPWDKNPEALAKWAEGR TGFPWIDAIMTQLRQEGWIHHLARH AVACFL  
TRGNLWISWEEGMKAFDELLIDADWSVNAGSWMWLS CSSFFQQFFHSYCPVGFGRRTPNGDYIRRYLPILRG  
FPAKYIYDPWNAPEEVQKASKCIIGVHYPKPMVNHA EASRVNIERMKQIYQQLSCYRGLGMLATVPANPKNGG  
NDCNLKDVTWTSQSPGGSSENHSIHEGMSQTERGQSSQKRREETPLQSTSKFWRQNK  
>Micropterus\_dolo\_XP\_045893137.1  
MPPSAAAGAEDSKALVRKMLREVLVGREDPEGFFAICVSALGHQETRTOFMSLIQPLSTASSSLHSILTSIYK  
EYFSKTEDKELEHALALS LLEMKDYRLSTPRQEPGDRLNQRSSQLAVVSRPPQTPQETELQKSTRVDKFNKE  
TPGTSQTVCVSRLSGSFSKQNTIEEGGHMDGDLNQSEKLKRSKNRRQRKGANQQIILGLPCSPLAPPPVLL  
WFRDLRLCDNPALMGSLLEV GAPVIPVFIWSP EEEEGPGITVAMGGACKYWLHQALSCFCSSLERIGSHLVIL  
KANGEGNKVGSSRLTLKDLVKETGARTVLANAVYEPWLKERDDAVVSALQKDGVKFRMFHSYCLRDPYSVSTE  
GVGLRGIGSVSHFMSCCKQNP GSALGVPLDPASLP TPAHWPQDVSLDALGLASMPHRKDGT IDWAANIRKS  
WDFSEGGAHARQETFLHDGVYRYEKESGRADAPNTSCLSPYLHFGQLSPRWLLWDAKGARCRPPKFQRKLAWR  
DLAYWQLTLFPDLPWESLRPPYKALRWNSDRGHLKAWQRGRTGYPLVDAAMRQLWL TGWMNNYMRHVVASFLI  
AYLHMPWQEGYRWFQDTLVDADVAIDAMMWQNGGMCGLDHWNFVMHPVNAAMTCDPYGSYVRKWCPELAALPD  
ELIHKPWKCPASMLRRAGVVFQGTYPERIVTDL DERRSQSLQDVALVRKVFGQYVDKRSGCDLVPLPPRLVSE  
ALGLSHRDGDVVTEGKQFLLPVITRMEFKHQLQDPDADAASN PYNVAVLNGYVSRKRDETI AFLNERDFTASVM  
HEGTQRKERLERDYRRMEGLTRPPASRGRARRTSTAKDRFSIVPAVAVTS LR  
>Micropterus\_dolo\_XP\_045893397.1  
MVVNSVHWFRKGLRLHDNPALQ EALNGADTVRCVYILDPWFAGAA NVGINRWRFLLEAELEDLSS LKKLNSRL  
FVVRGQPTDVFPRLLKEWEVTRLTFEYDPEPYGKERDGAIIKMAQEFGVETIVRNSHTLYNLDR IEMNNNSP  
PLTFKRQFTIVSRLELPRRPLPITKQQMDNCHTKIADNH DQLYSIPSLEELGFRT EGLPPAVWRGGESEASD  
RLNKHLDKKVWVANFEHPRVNRCSLYASPTGLSPYLRFGCLSCRVLYYNLRELYMKLRKRCSPPLSLFGQLLW  
REFFYTAATNNPNFDRMEGNPICVQIPWDQNPEALAKWAEGR TGFPWIDAIMTQLRQEGWIHHLARH AVACFL  
TRGDLWISWESGMKVFEELLLDADWSVNAGSWMWLS CSAFFQQFFHCYCPVGFGRRTPSGDYIRHYIPILKD  
YPNRYIYEPWNAPE SVQKAANC VVGVDY PKPMINHAEGSRLNIERMKQVYQQLSHYRGLSLLASVPTIQEEAE  
PPMTDESQTSSGPDSPPRGPADSEAAGCSTAPDSSTVCASSTYAPYPEPEDAVNIHPSQTPCPSSSSRTQPSA

AITSTASNPLSTPINSSPAHCPLSVSPAASCSTLSSSLSPASTATHSSLGHRRKGLACKVRRSQRRGRRICT  
PAAREGERRSEEEEEEREEAEGERMEEDVEQDEERMEEATSGETAGHQQ

>Micropterus\_dolo\_\_XP\_045908458.1

MLHCIWRSSPFHCAPRRLRFVAYRNQRPSSVFSCLTKSFTSEITMSAVKRKATFAAAAEEPSAKQQKLAPMK  
EKKERAGGWLQDLVTKQRTMELKFNNKRLRFISDTKKIKQSGSEGVLYWMSRDQRVQDNWALIHAQQLAMKE  
SLPLHICVCLHVPKSELSTLRHYSFMLKGLEEVAEECKTLDIQFHLLHGSPGEVVPGFVSDCSLGAVVTDSP  
LREPLQWLEDVKKMLPKDIPFIQVDAHNIIVTCWEASPKLEYAARTIRGKINKLLPEFLTQFPLVEKHPYTATR  
TTKQVDWDKTLASLQVDKTVRETEWAKPGTKAGLAMLESFIDVRLKQFDTKRNDPNAAALSQSPWIRFGHLS  
AQRVALQVQSSGKSAGQSVSSFIEELVVRRELTDNFCFYNNKYDSVEGAYEWAQKTLKDHGKDKRPYLYTCEQ  
LEKAKTHDKLWNAAQYQMITEGKMHGFLRMYWAKKILEWTSSPKEALSIALYLNDRYELDGQDPNGFVGCWWS  
ICGIHDQGWGERPVFGKIRYMNYKGCLRKFDVAQFERKYCPKNL

>Micropterus\_dolo\_\_XP\_045924268.1

MSTSRTIICLLRNDLRLHDNELFHWQRNAEYIVPLYCFDPRHYVGTYNYNLPKTGPFRLRFLQLSIRDLRST  
LLNKGSNLVVRHGKPEEVVADLIKQLGSVSVAFAHEEVCSEELNVEKRVKDVCAKMKIKVHTCWGATLYHRDD  
LPFHHSIRLPDVTYQFRKAVETQSRVRPVFPDPEQLKPLPQGLEGAIPTEVDLQQTEPMTDPRSAFPCSGGE  
SQALARLKHYFWDTDVATYKETRNGLIGVDYSTKFASWLMGCISPRYIYHQIKQYERERTANQSTYWVIFE  
LLWRDYFRFVGKYGKGNRLFQVKGLQDKSVPWKKDMELFNAWKEGRTGVPFVDANMRELAMTGFMSNRGRQNV  
SFLTKDLGLDWRMGAEWFEYLLIDYDVCSNYGNWLYSAGVGNDPRENKFNMIKQGLDYDNNGDYVRQWVPEL  
HGIRGADVHTPWTLSSTAALSHAQVSLGETYPTPIIIAPEWSRHANKKPSGMGPSRGGKGPSHTPKQHRDRGI  
DFYFSKSKNL

>Micropterus\_salm\_\_XP\_038557715.1

MLVLLIVNLEGERASGGSYPTLPQPLFTGMGHTCIHWFRKGLRLHDNPALMAALRDRELYPVFILDPLYLHNN  
TCMGINRWRFLIGALKDLDCSLRKHNSRLFVVRGKPEDVLLKLFKSKWVTKLTYEYDTEPYSLSRDKTVTALA  
KEHGLEVIYKISHTLYDIDRIIEENNGKPPITYNRMQAIIVKTLGPPKRPIPALTMEDMKDVKTPCSENHEKEY  
GIPTLEELSQSTAALREEQFPGEQEALRRLDEHMKRTEWVCSFEKQTSFNSLSPSTTVLSPYVTFGCLSAR  
TFWWRRLTDVYHGKKSAPPVSLHGQLLWREFFYTASVGIPIFNKMEGNPVCTQVDWDTNLEHLAAWTEARTGF  
PFIDAIMTQLRQEGWIHHLARHAVACFLTRGDLWISWEEGQKVFELLLDGDWALNAGNWQWLSASTFFHQFF  
RVYSPVAFGKKTDKNGDYIKKYLPLLKKFPAAYIYEPWKAPRNIQOEAGCIVGKDYPHPIAQHEVISKKNIQR  
MKLAYAKRSADPAESPRKKQGVKRKTPSVVMDLKKKQRRK

>Micropterus\_salm\_\_XP\_038561010.1

MPPSAAAGAEDSKALVRKMLREVLVGREDPEGFFAICVSALGHQETRTQFMSLIQPLSTASSSLHSILTSIYK  
EYFSKTEDKELEHTLALSLEMKDYHLSTPRQEPGDRLNQRSSQLAVVSRPPQTPQETELQKSTCVDKFNKE  
TPGTSQTVCVSRLSGSFSKQNTIEEGGHMDGGDLNQSEKLKRSKNRRQRRKGANQQIVGLPCSPLAPPPVLL  
WFRDLRLCDNPALMGSLLEVGAIPVFIWSPEEEEGPGITVAMGGACKYWLHQALSCFCSSLERIGSHLVIL  
KANGEGNKVGSSRLTKDLIKETGARTVLNAVYEPWLKERDDAVVSALQKDGKVFMRMFSYCLRDPYSVSTE  
GVGLRGIGSVSHFMSCKQNPGSALGVPLDPPASLPTPAHWPQDVSLDALGLASMPHRKDGTIDWAANIRKS  
WDFSEGGAHARQETFLHDGVYRYEKESGRADAPNTSCLSPYLHFGQLSPRWLLWDAKGACCRPPKFQKLAWR  
DLAYWQLTLFPDLPWESLRPPYKALRWNSDRGHLKAWQGRGTGYPLVDAAMRQLWLITGWMNNYMRHVVASFLI  
AYLHMPWQEGYRWFQDTLVDADVAIDAMMWQNGGMCGLDHNFMHPVNAAMTCDPYGNYVRKWCPELAALPD  
ELIHKPWKCPASMLRRAGVVFQGYTYPERIVTDLDERRSQSLQDVALVRKVFGQYVDRSGCDLVPLPPRLVSE  
ALGLSHRDGDVVTEGKQFLLPVITRMEFKHQLODPDADAASNPNVAVLKGYSRKRDETI AFLNERDFTASVM  
HEGTQRKERLERDYRRMEGLTRPPASRGRARRTSTAKDRFSIVPAVAVTSLR

>Micropterus\_salm\_\_XP\_038574376.1

MLHCIWRSSPFHCAPRRLRFVAYRNQRPSSVFSCLTKSITSEITMSAVKRKATSAAAAEEPSAKQQKLAPMK  
EKKERAGGWLQDLVTKQRTMELKFNNKRLRFISDTKKIKQSGSEGVLYWMSRDQRVQDNWALIHAQQLAMKE  
SLPLHICVCLHVPKSELSTLRHYSFMLKGLEEVAEECKTLDIQFHLLHGSPGEVVPSPFVSDCSLGAVVTDSP  
LREPLQWLEDVKKMLPKDIPFIQVDAHNIIVTCWEASPKLEYAARTIRGKINKLLPEFLTQFPLVEKHPYTATR  
TTKQVDWDKTLASLQVDKTVGETEWAKPGTKAGLAMLESFIDVRLKQFDTKRNDPNAAALSQSPWIRFGHLS  
AQRVALQVQSSGKSAGQSVSSFIEELVVRRELTDNFCFYNNKYDSVEGAYEWAQKTLKDHGKDKRPYLYTCEQ  
LEKAKTHDKLWNAAQYQMITEGKMHGFLRMYWAKKILEWTSSPKEALSIALYLNDRYELDGQDPNGFVGCWWS  
ICGIHDQGWGERPVFGKIRYMNYKGCLRKFAVAQFERKYCPKNL

>Micropterus\_salm\_\_XP\_038583812.1

MVVNSVHWFRKGLRLHDNPALQAEALNGADTVRCVYILDPWFAGAAVNGINRWRFLLEALEDLDSLLKKLNSRL  
FVVRGQPTDVFPRLLKEWEVTRLTFEYDPEPYGKERDGAIIKMAQEFVGVETIVRNSHTLYNLDRIIEMNNNSP  
PLTFKRQFTIVSRLELPRRPLPPITKQQMDNCHTKIADNHDQLYSIPSLEELGFRTEGLPPAVWRGGESEASD  
RLNKHLDKKVWVANFEHPRVNRCSLYASPTGLSPYLRFGLSCRVLYYNLRELYMKLRKRCSPPLSLFGQLLW  
REFFYTAATNNPNFDRMEGNPICVQIPWDQNPEALAKWAEGRTGFPWIDAIMTQLRQEGWIHHLARHAVACFL  
TRGDLWISWESGMKVFEELLLDADWSVNAGSWMWLSCSAFAFFQQFFHCYCPVGFGRRTDPSGDYIRHYIPILKD  
YPNRYIYEPWNAPESVQKAANCVVGVDPKPKMINHAEGSRLNIERMKQVYQQLSHYRGLSLLASVPTIQEEAE

PPMTDESQTSSGPDSPPRGPADSEAAGCSTAPDSSTVCASSTYAPYPEPEDAVNIHPSRHPAPHQAHASPLQ  
P

>Micropterus\_salm\_\_XP\_038584736.1

MSTSRTIICLLRNDLRLHDNELFHWQRNAEYVVPLYCFDPRHYVGTYNYNLPKTGPFRLRFLQLSIRDLRST  
LLIKGSNLVVRHGKPEEVVADLIKQLGVSVAFAHEEVCSEELNVEKRVKDVCAIMKIKVHTCWGATLYHRDD  
LPFHHISRLPDVYTQFRKAVETQSRVRPVFPDPEQLKPLPQGLEEGAIPTEVDLQQTEPVTDPRAFPYSGGE  
SQALARLKHFWDTDAVATYKETRNLIGVDYSTKFASWLAGCISPRYIYHQIKQYERERTANQSTYWVIFE  
LLWRDYFRFVGKYGNRFLQVKGLQDKSVPWKKDMELFNAWKEGRTGVPFVDANMRELAMTGFMSNRGRQNV  
SFLTKDLGLDWRMGAWEFYEYLLIDYDVCSNYGNWLYSAGVGNDRPNRKFNMKQGLDYDNNGDYVRQWVPEL  
HGIRGADVHTPWTLSAALSHAQVSLGETYPTPIIIAPEWSRHANKKPSGMGPSRGGKGPSHTPKQHRDRGI  
DFYFSKSKNL

>Mirounga\_leon\_\_KAF3814493.1

MEPLEIPVETITSEVIEKCTTPLSDDHDEKYGVPSLEELGFDTDGLPSAVWPGGETEALTRLERHLERKAWVA  
NFERPRMNANSLASPTGLSPYLRFGCLSCRLFYFKLTDLYKKVKNSSPPLSLYGQLLWREFFYTAATNNPR  
FDKMEGNPICVQIPWDKNPEALAKWAEGRGTFPWIDAIMTQLRQEGWIHHLARHAVACFLTRGDLWISWEEGM  
KVFEELLLDADWSINAGSWMWLSCSSFFQQFFHCYCPVGFGRRTPNGDYIRRYLPVLRGFPKYIYDPWNAP  
EGIQKVAKCLIGVNYPKPMVNHAESRLNIERMKQIYQQLSRYRGLGLLASVPSNPNGNGGLMGYSPGENIPG  
CSSSGSCSQSGILHYAHGDSQQTHLLKQGRSSMGTGLSTGKRPSSEEDTQSIGPKVQRQSTN

>Mirounga\_leon\_\_XP\_034868536.1

MAAAVVTAVAAAQASAAGVDGASSVHWFRKGLRLHDNPALLAAVRGARCVRVYILDPWFFAASSSVGINRWRF  
LLQSLLEDLDTSLRKLNSRLFVVRGQPADVFPRLFKEWGVTRLTFEYDSEFPFGKERDAAIMKMAKEAGVEVTE  
NSHTLYDLDKIIELNQGKPLTYKRFQAIISRMELPKKPVGSVTSQQMESCRADIQENHDDTYGVPSLEELGF  
PTEGLGPAVWQGETEALARLDKHLERKAWVANYERPRMNANSLASPTGLSPYLRFGCLSSRLFYRLWDLY  
KKVKRNSTPPLSLFGQLLWREFFYTAATNNPRFDRMEGNPICIQIPWDRNPEALAKWAEKGTGFPWIDAIMTQ  
LRQEGWIHHLARHAVACFLTRGDLWVSWESGVRVDFELLLDADFSVNAGSWMWLSCSAFFQQFFHCYCPVGFG  
RRTPSGDYIRRYLPILKGFPSRYIYEPWNAPESIQAACCIIGVDYPRPIVNHAEATSRLNIERMKQIYQQLS  
RYRGLCLLASVPSCVEDLSNPVAEPSSGQTGSMSSAGPRTLPSGPASPKRKLEAAEPPGEELSKRARVAEVP  
APELPSRDV

>Misgurnus\_angu\_\_BBI18597.1

MAPNSIHWFRKGLRLHDNPALQEAVRGADTVRCVYFLDPWFAGSSNLGVNRWRFLQLCLDDLDSSLRKLNSRL  
FVIRGQPANVFPRLFKEWKISRLTFEYDSEFPFGKERDAAIKKLAMEAGVEVIVKISHTLYNLDKIIELNQGQ  
PLTYKRFQTLISRMDDPEMPEETLSNAMGCCVTPVSEDHGDYGVPSLEELGFDEGLPSAVWPGGETEALT  
RIERHLERKAWVANFERPRMNANSLASPTGLSPYLRFGCLSCRLFYFKLTDLYRKVKKTSTPPLSLYGQLLW  
REFFYTAATTNPRFDKMEGNPICVRIPWDKNPEALAKWAEAKTGFPWIDAIMTQLRQEGWIHHLARHAVACFL  
TRGDLWISWEEGMKVFEELLLDADWSVNAGSWMWLSCSSFFQQFFHCYCPVGFGRRTPNGDFIRRYLPILRG  
FPAKYIYDPWNAPDCVQAAAKCIIGVHYPKPMVNHAESRLNIERMKQIYQQLSRYRGLGLLASVPSTHNGNG  
NGMAYSPGEQQSGSNTAPAVSGSSVASGNRNGSILLNFGNQEHQGPSGIQQQ

>Misgurnus\_angu\_\_BBI18600.1

MSQNCIHWFRKGLRLHDNPALIAALKDCRHIYPLFLDDPWFNNTKIGINRWRFLEAELEDLDSSLKKLNSRL  
FVIRGSPSEVLPLKLFKWKITRLTFEVDTEPYSQSRDKEVMKLAEEHGVVIVPKISHTLYNIDRIIDENSGKP  
PLTYVRFQTVVKNIGPPKKPVPAPEEQMDKDVSTPLSKNHEEEFGIPTLEDLGLDTSLSLGNLFPGGESLR  
RLDEHMERTGWVCTFEKPNTSPNALTPSTTVLSPYVRFGLSARTFWWKLTDVYRGKKHSQPPVSLHGQLLWR  
EFFYTAAVGIPNFNTMKGNTICVQVDWDDNLEHLAAWREARTGFPFIDAIMTQLRQEGWIHHLARHAVACFLT  
RGDLWISWEEGQKVFEELLLDADWSLNAGNWQWLSASTFFHQYFRVYSPVAFGKKTDKYGDYIKKYLPLVRKF  
PAEYIYEPWKAPRSVQERAGCIVGKDYPRPIVEHEVVHKKNIQRMKAAYAKRSTDDGHDKTETKGIKRKTNAS  
IKNMFACKAKN

>Misgurnus\_angu\_\_BBI18601.1

MTHRTIHLFRKGLRLHDNPNTLLAALESSSALYPVYVLETEEANRLGALRWRFILQSLLEDLDGRLRALGSRLYV  
LRGSTLAVLRELVTWRVAVTQISYDTEVEPHYTRMDLDIRTLAQERGIKTHTCVSHTLYDVRRRIKANGGSPPL  
TYKKFLHVSVLGEPEKPVREITAEDFLRCPTPPDPDHERQFGIPSLLEDLGLQVPSEVLWPGGETHALKRLQQ  
HLKSQGWVANFSKPRTPVNSLLPSTTGLSPYISLGCLSVRTFYHRLSSIYAQSRNHSLPPVSLQGQVLWREFF  
YTVASTTPNFIRMQGNPICLQIDWKHDPEALEKWRTAQTFPWFIDAIMTQLREEGWIHHLARHAVACFLTRGD  
LWISW

>Misgurnus\_angu\_\_BBI18602.1

MSATRTVICLLRNDLRLHDNEVFCWAQRNAEHIVPLYCFDPRHYQGTYHYNFPKTGPFRLRFLLDSDVIDLRAT  
LKKQGSTLLVRHGKPEDVVSLLIKQLGSVTALAFQEEVASEEKNVEKKLKEVCSQNKVKVQTFWGSTLYHRDD  
LPFHSIKRLPDVYTQFRKEVEGQGRIRPVFPTEQIKSLPPGLEEGPILTFEALGQTEPVDNCRSAFPCRGGE  
TEALARLKHFWETNAVASYKETRNLIGVDYSTKFSSWLALGCISPRYIYDQIKKYEAERTANQSTYWVIFE  
LLWRDYFKFVGLKYGNRIFHINGLQDKHVPWKTNTLFWNAWKEGKTGVPFVDANMRELALTGFMSNRGRQNV  
SFLTKDLGLDWRLGAWEFYEYLLVGNIIHYICVGGLMVFGMITLCTVIF

>Misgurnus\_angu\_\_BBI18603.1

MSCCQQNPVSSPSTPLDSPGALPVPSSWPQGCLVDLGLARMPRRKDGTEIDWAGNIRSSWDFSEEGAHACLE  
AFLRDGVYRYEKESSRADSPNTSSLSPLYLHFGQLSARWVLWDARGARCRPPKFQORKLAWRDLAYWQLCLFPDL  
PWESVRPPYRALRWSSDRTHLKAWQRGGTGYPLVDAAMRQLWQTGWMNNYMRHVVASFLIAYLHLPWQEGYRW  
FQDTLVDADLAIDAMMWQNGGMCGLDHWNVFMPVDAALTCDPYGNVVRQWCPELKDLPNDLIHKPWKCPASM  
LRRAGVILGENYPVRTVVDLEERRAQSLLQDVTSVRRCFKEFVDQRSGLDLVPLPPRLVHEALDGREDDVMICEG  
SGFLLPVITRMEFKHQFEGPDGQSNPHSAVLKGYVSRKRDETI AFLNERDFTASVMSENAQRRELERDCRLLEGLPPPTASRGRARTSTRDTYSRVPGGVTI PHK

>Molossus\_molo\_\_XP\_036108654.1

MGVNAVHWFRKGLRLHDNPALKECIQGADTIRCXYILDPWFAGSSSVGINRWRFLQCLELDANLRKLNSRL  
FVIRGQPADVFPRLFKAWNITKLSIEYDSEPFGERDAAIKKLATEAGVEVIVRISHTLYDLDKI IELNGGQP  
PLTYKRFQTLVSKMEPLEIPVETITSDVIEKCTTPLSDHDEKYGVPSLEELGFDTDGLSSAVWPGGETEALT  
RLERHLERKAWVANFERPRMNANSLASPTGLSPYLRFGCLSCRLFYFKLTDLYKKVKKNSSPPLSLYGQLLW  
REFFYTAATNNPRFDKMEGNPICVQIPWDKNPEALAKWAEGRGTFPWIDAIMTQLRQEGWIHHLARHAVACFV  
TRGDLWISWEEGMKVFEELLLDADWSINAGSWMWLSCSSFFQQFFHCYCPVGFGRRTDPNGDYIRRYLPVLRG  
FPAKYIYDPWNAPEGIQKVAKCLIGVNYPKPMVNHAESRLNIERMKQIYQQLSRYRGLGLLASVPSNPNGNG  
GLMGYSPPGENIAGCSNSGRSSMGTGLSSGKRPSQEEDTQSIGPKVQRQSTN

>Molossus\_molo\_\_XP\_036114156.1

MAATAVTATAAALAPAAAGTDGASSVHWFRKGLRLHDNPALLAAVRGARCVRVCYILDPWFAASSSVGINRWRFL  
LLQSLEDLDTSLRKLNSRLFVVRGQPADVFPRLFKEWGVTRLTFFEYDSEPFGERDAAIMKMAKEAGVEVVT  
NSHTLYDLDRIIELNGQKPLTYKRFQAIISRMELPKKPVGSVTSQQMGRCPAEIQENHDETYGVPSLEELGF  
PTEGLGPAVWQGGETEALARDKHLEKAWVASYERPRMNANSLASPTGLSPYLRFGCLSCRLFYRLWLDLY  
KKVKRNSTPPLSLFGQLLWREFFYTAATNNPRFDRMEGNPICIQIPWDRNPEALAKWAEKGTGFPWIDAIMTQ  
LRQEGWIHHLARHAVACFLTRGDLWVSWESGVRVDFELLLDADFVNAGSWMWLSCSAFFQQFFHCYCPVGF  
RRTDPGSDYIRRYLPKLKGFPSRYIYEPWNAPEVQKAAKCIIGVDYPRPIVNHAETSRLNIERMKQIYQQLS  
RYRGLCLLASVPSCVEDLSSPVAEPTSSQTGSSGSAGPRPLPSGPASPKRKLEAAEEPPGEELSKRARVAELP  
APELPSRDV

>Monodelphis\_domestica\_XP\_007497436.1\_PREDICTED:

MAATAVVTMTAAAPAPAPAPAPATASAPVPGPAPKEGASSVHWFRKGLRLHDNPALQAALRGARCVRVCYILDP  
PWFAASSSVGINRWRFLQSLLEDLDSLRLKLNSRLFVVRGQPTDVFPRFLFKEWGVTRLTFFEYDSEPFGERDA  
AIVKMAKEAGVEVVTENSHTLYDLDRIIELNGQKPLTYKRFQAIISRMELPRKPVNSVTSQQMERCQAEIQE  
NHDDAYGVPSLEELGFPTDGLGPAVWQGGETEALARDKHLEKAWVANYSERPRMNANSLASPTGLSPYLRFG  
GCLSCRLFYRLWELYYKKVKRNSTPPLSLYGQLLWREFFYTAATNNPKFDRMEGNPICIQIPWDRNPEALAKW  
AEGKTGFPWIDAIMTQLRQEGWIHHLARHAVACFLTRGDLWVSWESGVRVDFELLLDADFVNAGSWMWLSCS  
AFFQQFFHCYCPXGFGRRTPSGDYVRRYLPQLKGFPARYIYEPWNAPEVQKAAKCIIGVDYPRPIVNHAET  
SRLNIERMKQIYQQLSRYRGLCLLASVPSCLEDLSSPMVEASLGQAGAVSGPGLKPLPCSPASPKRKLEATEE  
APGEEHSKRARVMVAARLPGSELAKDV

>Monodelphis\_dom\_NP\_001028149.1\_DNA\_photol

MQSRLQTASSVLEFRFNKQVRRLISQDCHLQDHSQAFVYWMSRDQRVQDNWAFLYAQRLALKQKLPLHVCFCCL  
APCFLGATIRHYDFMLRGLLEEVAEECEKLHPIFHLGLPKDVLPAFVQAHSIGGIIVTDFSPLLHHTQWVKDV  
QDGLPKQVPFVQVDAHNIVPCWIASDKQEYGARTIRHKIHDRPLPHFLTEFPFVICHPPYPSNIQAEVVDWNACR  
AGLQVDRSVKEVSWAKPGTASGLTMLQSFISQRLPYFGSDRNNPNKDALSNSPWFHFGQVSVQRAILEVQKH  
RSRYPDVANFVEEAVVRRELADNFCFYKNKYDKLEGAYDWAQTTLRLHAKDKRPHLYSLEQLESQKTHDPLW  
NAAQMOMVQEGKMHGFLRMWAKKILEWTRSPEEALEFAIYLNDRFQLDGRDPNGYVGCMSWISICGIHQDQGWAE  
REIFGKIRYMNAGCKRKFVDAEFERKYSRAD

>Monodelphis\_dom\_XP\_016281314.1\_LOW\_QUALIT

MGVNAGHWFRKGLRLPHNPALKGCIQGADTVCCVYIRDPWFAGSSNFGANEWKFLQCLELDANLRKLNSRL  
FVIRGQPADVFPRLFKAWNIAKLSIEYDSEPFGERDAAIKKLASEAGVEVIVRISHTLYDLDKI IELNGGQP  
PLTYKRFQTLISKMEPLATPVETITPEVMHKCVTPLSDEHDEKYGVPSLEELGFDTDGLPSAVWPGGETEALT  
RLERHLERKAWVANFERPRMNANSLASPTGLSPYLRFGCLSCRLFYFKLTDLYKKVKKNSSPPLSLYGQLLW  
REFFYTAATNNPRFDKMEGNPICVQIPWDRNPEALAKWAEGRGTFPWIDAIMTQLRQEGWIHHLARHAVACFL  
TRGDLWISWEEGMKVFEELLLDADWSINAGSWMWLSCSSFFQQFFHCYCPVGFGRRTDPNGDYIRRYLPVLRG  
FPAKYIYDPWNAPEGIQKVAKCLIGVNYPKPMVNHAESRLNIERMKQIYQQLSRYRGLGLLASVPSNPNGNG  
SLMAYTPGENIPGCSSGGAPVGASDGQILQACVLPPEPTGTSGVQQPGYSQSGSISHYSHEDSQQAYMLKQG  
RSSLGVGGGKRPRQEEETQSINPKVQRQSTN

>Monopterus\_albu\_\_XP\_020443658.1

MVVNSMHWFRKGLRLHDNPALQEALNGADTVRCVYILDPWFAGASDVGINRWRFLLEALELDLNSLKKFHSRL  
FVVRGQPTDVFPRFLFKEWKVTRLTFFEYDPEPYGKDRDGAI IKVAQEFVETTVVRNSHTLFNLDRIIEMNNNSA  
PLTFKRFQTI VSRLELPRRPLPPVTYQQMDKCRTKMADNHDQLYSIPSLEELGFRTEGLLPVWQGGGESEALD  
RLNKHLDKKVWVANFEHSRRNTCSLYASPTGLSPYLRFGCLSCRVLYYNLRELYMKIPWDQNPEALAKWAEGR

TGFPWIDAIMTQLRQEGWIHHLARHAVACFLTRGDLWITWESGMKVFEELLLDADWSVNAGSWMWLSCSAFFQ  
QFFHCYCPVGFGRRTDPSGDYIRRYIPTLKDYPNRYIYEPWNAPESVQKAANCVVGVDPKPMINHAEGSRLN  
IERMKQVYQQLSHYRGLSLLASVPTIQEEAEPPMTDESQSSSGPDSPLRGPADTKAAPDSSTLCASFTSAPSD  
LEDGHPSQTPCTSSGLHTWSSAAITCTSASHPPRTAASLSPATTPAQRPLSRSKPTSPSPCPTLFPSPGPAT  
MPTQTALGP RRKGLARKMRRSQ RQRGRPSSTPFATEGERRTEERMEEDVEQDEEQMEEETSGETAGRQQ

>Monopterus\_albu\_\_XP\_020445661.1

MAYQNCCLLHYLTHRVTNMAHTCVHWFRKGLRLHDNPALMAALRDCKELYPVFIVDPYLHNNTCVGINRWRF  
VGALKDLDCSLKKLNSRLFVVVRGKPEDVLPRLFNKWKVTQLTYEYDTEPYSLSRDRTVAALAKERGVKVICKI  
SHTIYDIDRIIEENNGKAPLTYNHMQAIVKAQSPRRRPIPAPTMEDMKDVKTPCSENHEMKYGIPTLEELGHG  
TAALAEELFPGGEQEALRRLEEYMKRTEWVCSFEKPQTS PNSLS PSTTVLSPYVTFGCLSACTFWWRLTEVYQ  
GKKHKSPPVSLHGQLLWREFFYTASVGIPNFNKMEGNPVCTQVDWDTNSEYLAAWREARTGFPFIDAIMTQLR  
QEGWIHHLARHAVACFLTRGDLWISWEEGQKVFEELLLDLDWALNAGNWQWLSASTFFHQFFRVYSPIAFGKK  
TDKNGDYIRKYLPLLKKFPAKFIYEPWKA PRSVQQAAGCIVGKDYPSPIVQHELVS KKNIQRMKLAYAKRNST  
ESQTKSPRKWHGVKRKAPSVIDMLNKKDKRKNVGAN

>Monopterus\_albu\_\_XP\_020457983.1

MSNAAPRTVICLLRNDLRVHDNELFHWVQTNAEYVVPVYCFDPRHYVGTYNYNLPKTGPFRLRFLLESVRDLR  
NTLLSMGSNLVVRGKPEDVIAELIKQLQSVTTVAHFKEVTSEELNVEKKLKEVCDQMEVQVHICWGSTLYHR  
DDL PFHMSGLPDVYTQFRKAVEIQSRVRPLFPTPRQLKPLPPGLEEGAIP TAADLQKKEPVTDP RSAPFCNG  
GESQALARLKH YFWDTDAVATYKETRNGLIGVDYSTKFAPWLAMGCISPRYIYHQIKQY EKERTANQSTYWVI  
FELLWRDYFKFVGKYG NRFLQ LKGLQDKSVPWKKDMELFNAWKEGRTGV PFVDANMRELAVTGFM SNRGRQN  
VASFLT KDLGLDWRMGAEWFEYLLIDYDVCSNYGNWLYSAGIGNDPREN RKFNMIKQGLDYDSNGDYIRQWVP  
ELQNI RGS DVHTPWTLS SAVLSHAHVSLGENYPTPIVIAPEWRRHINKPSGTGLSARGKKNSSHTPEPHRGRG  
MDFYFSRSKNL

>Monopterus\_albu\_\_XP\_020469337.1

MVVNTIHWFRKGLRLHDNP SLKESLLGADTVRCVYILDPWFAGSSNVGINRWRFLLQSLEDLDSSLRKLNSRL  
FVIRGQPTDVF PRLFKWKITRLSYEYDSEPF GKERDAAIKKLASEAGVEVTVRISHTLYDLDKI IELNGGQS  
PLTYKR FQSLISCM DAVEVPAESITAEIMGKCTTPLSEDHDDKFGVPSLEELGFDTEGLSSAVWP GGETEALT  
RLERHLERKAWVANFERPRMNAN SLLASPTGLSPYLRFGCLSCRLFYFKLTDLYRKVKKNSSPPLSLYGQLLW  
REFFYTAA TNNPCFDKMENN PICVQIPWDRNPEALAKWAEGRTGFPWIDAVMTQLRQEGWIHHLARHAVACFL  
TRGDLWISWEEGMKVFEELLLDADWSVNAGSWMWLSCSSFFQ QFFHCYCPVGFGRRTDPNGDYIRRYLPILRG  
FPAKYIYDPWNAPESVQKA AKCIIGVHYPKPMVHHA EASRLSIERMKQIYQQLSCYRGLGLLATVPSNSGGNG  
NGNGETSSDGMGF PVEATHSATTASSYQMPVHSQGDWQSGVMMYLQGGPQTSISTQQQGCAGNSSSMMCYSQG  
TQHIPAPV IQGPEHHSTTQT TGRH SKDSGNGKCSKVQKQSSH

>Monopterus\_albu\_\_XP\_020479740.1

MFLCISRSLSFSSAPKR FVELVVP SHQRPIPALFFLNKLTSETIMP NQKRKATPAAAAAATSEGSSTKRQKL  
ATTKRDEGLQDLVKQQRSENKELKFNLKRVRFISDTEKLKQ GSEGVLYWMSRDQ RVQDNWALIHAQQ LAVKE  
SLPLHVCLCLVVPKSELSTLRHYSFMLKGLEEVEKVLTXL SLNALT KAINS RDVLPGFVSDRNLGAVVTDFSP  
LREPLQWLEDIKRLTKDIPLIQVDAHNIVPCWVASPKLEYSARTIRKITSL LPEFFTD FVPVEKH PYTATR  
TAKSIDWDKTLASLHVDRTVGEPEWAKPGAKAGMAMLESFIDARLKLFGTKRNDPNAAALS QLSPWIRFGQIS  
AQ RVALQVNHSGKNSNTRQTVASFIEEVVVRRELT DNFCFYKNYDSIEGAYEWAQKTLRDHAKDKRPYLYTR  
QQLENAKTYDKLWNAAQ CQMVT EGKMHGYLRMYWAKKILEWTSSPEDALSIALYLNDRYELDGQDPNGFVGCM  
WSICGIHDQGWRE RPVFGKIRYMNYKGCARKFDVAQFERNYCPKNL

>Monosiga\_brevic\_\_XP\_001746666.1

MTAPGTAVRGAAA AVNPMINGHPLPWPPCLMTKKTCLQMMRSYGPQWAQSTIARASPRRHRLKR PRLPTYLIL  
GTMARARPLRHRLNQWRQSRHPSAIYLTLIWRRPRQH PHSQH QRLQSTRWLQTCSTLAWGQSPPRARPRRRQL  
LFNASRYKANHHSCAWCQFRCGHEYGHGCGVSPSTTPSGPIQPAGTTTTTRGLWRQGV RQDVRQGRWRIGSFG  
WDWSLCSAPSACFLSFVRALVQDGMFDDLSDSRFAKRNEKPSSLGAMLKTT RMANEDPIVVEVEAWCEGKDN  
NIRALLGSLDIILWEGARWKPINIGVLT DNNQVRKAYQ RACL VVHPDKLPNNLPVIRTM AKA AKKAKVNTSA  
DDDDAGHAQQNGSQGIPPGPKDFLMERVRAVTPGVDPKEGQC VLYWMSRDQRPTDNWALLYARHLAQERDVPL  
RVVFC LVPKFLEATIRQFGFMLDGLQVVETHLRKKHIFHLLTGYAKDVL PKFAEEQEACAVVCDMSPLRVPM  
AWVKETGSKL KDMNVPLYQVDAHNIVPVWHASPKQEYAA RTIRNKIHQKLDTC LQPFPELESNSNSVQLPDTV  
DWKKARESLEINWDVKEVDWLKPGYEGGMKMLEEFINERLHRYADDRNDPNLDALS NLSPYYHFGQISVQRVV  
LELRSKQRGKYAEGVKAYIEEAVVRRELSDNFCFYNHRYDSVEGASAWAQETLDVH SKDKREHLYTRKQLENA  
ETADDLWNASQLQLVQEGKMHGFLRMYWAKKILEWTESPEKALEDAIYLN DKYELDGRDPNGYVGCMWSICGI  
HDQGWGERPVFGKIRYMNYKGC KRKFDIAAFVKRYPPAAKNAAREAIHLRDSSFSHMC AASLMRWNTGIGPRP  
SMRARRCK

>Monosiga\_bre\_\_XP\_001745157.1\_uncharacte

MAKAGNPRPVVWFRNDLRVHDNEVLLQAAKASHNHVVPVYCFDIRQYSLVI THRSRRCGQFPKCGRPRARFL  
IESVDDLRLTRLQELGSGLVVRTGLPEEEVARVAAQVGATQVF AHQEVCS EEVAAEHRLKRQLEVPLSLHWGAV  
TLCHLDDLD FGP RCKHLP SVFTQFRKRVEADMHVRPVVAAPARLAPLPSDLELGSIPTVEDLCPGQHEPDERA

VLPFKGGETAARARLQYYLWESNLLASYKDTRNGLVGGDYSSKFSPWLAHGNTARWIYHEVKRYEQERTENT  
STYWLIFELLWRDYFRFVALQHGTAFKPGGVQHKDVPWRHSPADFEAWQNGQTGFPIFIDANMRELAKTGFMS  
NRGRQNVASFLTQDLQIDWRLGAWEFETLLLDHDPSCSNYGNWNYAAGVGNDRQGRHFNVIKQAKTYDPTAEY  
VHLWVPELRGLDAPQAHVPFKLSSEELAQANIQLGSTYPRPVDRDLGGRLPLKVRDETAYGPHVQLPQQGLI  
KMILFDTLFTGLSW

>Monosiga\_bre\_XP\_001747506.1\_uncharacte

MSSSSISLHWFRKGQRLHDNPALWRALRGATQVYPVFVIDPHFAKPENVGVLRYNFFLESKDLDEQLRGLGS  
RLYVLRGKPEEQLPKKFKWKVTRLTYELDTEPYARVRDAAINDLAKKHNVIEVIAEAGHMLHDPESYLKKCGG  
ASKDRQDKSYDVPTLKEMGYSPIKAPQMVLFPGGEREALKRLEHFIIKKKNWIATFEKPKTNPAALDPDTTGLS  
PYMKMGCLSVRKFWYDVQKVYDEKKDHSTPPESLHGQLLFRELFHLCGYAVKNFDMKMGNRICRQIDWDYSEK  
FLDAWENSKTGYPWIDACMAQLRHEGWMHHLARHAVACFLTRGDLYQSWEHGARI FEKHLVDADWHLNANWM  
WLSCSSFFYQYFRVYSPIGFGQKYDKEGAFIRKYLPLVKDMPKKYIYEPWKAPKEVQQKAKCIIGKDYPEPIV  
DHSDVSETNKDRMKACYDAHKRGGPIPGSVSRGATTDGAPTQKRPKHE

>Morone\_saxa\_\_XP\_035507976.1

MAQTCIHWVPQGLRLHDNPALMAALRDCRKLYPVFIPTPYLHNNTSVGINRWRFLIGALKDLDGSLRKLNS  
SGVDVRARSSLNVSAMLSTNLSVGECTVIKKKTESVSCDACLKGNFRGRFRKCLICYDYDLASCYESGATTT  
RHTTEHPMQCILTRVDYDLYYGGDTFSVDQPPQSFTCPYCGKMGYTETSLQEHVTSEHAETSTEVGWVCSFEKP  
QTSPNSLTPTSTTVLSPYVTFGCLSARTFWWRLLTDVYQGGKHSDPPVSLHGOQLLWREFYYTASVGIPNFNKMEG  
NSVCTQVDWDTNPEYLAAWTEARTGFPIFIDAIMTQLRQEGWIHHLARHAVACFLTRGDLWISWEEGQKVFEEL  
LLDGDWALNAGNWMWLSASAFFHQFFRVYSPVAFGKKTDKNGDYIKKYLPLLKKFPAAYIYEPWKAPRSVQQA  
AGCIVGKDYPHPIVQHEVISKNIQRMKLAYAKRSTDPAESPSKKQGVKRKAPSVDMLTKKERKK

>Morone\_saxa\_\_XP\_035520224.1

MVVNSVHWFRKGLRLHDNPALQAEALNGADTVRCVYILDPWFAGAANVGINRWRFLLEALEDLDSLLKLN  
FVVRGQPTDVFPRLLKEWQVTRLTFEYDSEPYGKERDGAIIKMAQEFQVETVVRNSHTLYNLDRIIEMNNNSP  
PLTFKRFQTIVSRLELPRRPLPPITQQQMDKCRTKIADNHDQLYSIPSLLEELGFRTEGLPPAIWQGGSEALD  
RLNKHLDKKVWVANFEHPRVNTCSLYASPTGLSPYLRFGCLSCRVLYYNLRELYMKLRKRCSPPLSLFGQLLW  
REFFYTAAATNNPNFDRMDGNPICVQIPWDQNPEALAKWAEGRGTGFPWIDAIMTQLRQEGWIHHLARHAVACFL  
TRGDLWI

>Morone\_saxa\_\_XP\_035520598.1

MKEQQQLSTPGHQSRPQQPGDRLKQRSSLQLISVSQPPQGSRHTQLVDAVGQRENTNSQTPEWVKVNPTQTRET  
ELQKNTQVYKYNKEAPETSQTVCVSFSKQEMVEEGDQVMGEGDLNKSDDPKRSKNRRQRKGTGQQVVLPCS  
PSAPPPVLLWFRDLRLCDNPALNGSLEVGAIPVFIWSPEEEEPGGITVAMGGACKYWLHQALSCFCSSLE  
RIGSHLVFLRASGEGKEVGSSSLRTLKQLVKETGARTVLANALYEPWLKERDNVVVSALQKDGVECRMVHSYCL  
RDPYSISTDGVGLRGIGSVSHFMSCKQNPFGPALGVPLDPPVSLPTPGHWPGQVSLDTLGLARMPRRKDGTTI  
DWAANIRKAWDFSEEGAHAQLEAFLQDGVYRYEKESGRADAPNTSCLSPYLHFGQLSPRWLLWDAKGARCRPP  
KFQRKLAWRDLAYWQLILFPDLPWESLRPPYKALRWSSDRGHLKAWQRGQTGYPLVDAAMRQLWLTGWMNNYM  
RHVVASFLIAYLYLPWQEGYRWFQDTLVDADVAIDAMMWQNGGMCGLDHWNFVMHPVDAAMTCDPYGSYVRKW  
CPCLADLPDELIHKPWKCPASMLRRAGVVFQGTYPERIITDLEERRSRSLQDVALVRKEFGQYVDKRSGCDLV  
PLPPRLVSEALGLSQRDEGVVTAGKQFLLPVITRMEFKHQLEDPDADAASNPYSAVLKGYVSRKRDETI AFLN  
ERDFTASVMYEGTQRKERLES DYRRMEGLPQPPAPRGRARRTP TAKDRFSIVPGGAVTSLK

>Morone\_saxa\_\_XP\_035520960.1

MSTSRTIICLLRNDLRLHDNELFHWAEARNAEYIVPLYCFDPRHYVGTYNYNLPKTGPFRLRFLLLDSIRDLRNT  
LLNKGSNLVVRQGKPEEVVADLIKQLGSVSTVAFHEEVTSEELNVEKGVKDVCAQMKVKVHTCWGSTLYHRDD  
LPFHHISRLPDVYTQFRKAVETQSRVRPVFPTPEQLKPLPSGLEGAIPTAEDLQQTEPLTDPRSAFPCSGGE  
SQALARLKHYFWDTDVATYKETRNGLIGVDYSTKFAPWLAMGCISPRYIYHQIKQYKERTANQSTYWVIFE  
LLWRDYFKFVGKYGKGNRLFQVKGLQDKSI PWKKDMKLFNAWKEGRTGVFPFVDANMRELAMTGFMSNRGRQNV  
SFLTQDLGLDWRMGAWEFYEYLLIDHDVCSNYGNWLYSAGIGNDPRENRKFNMIKQGLDYDSNGDYVRQWVPEL  
QGIKADVHTPWTLSAALSHAVSLGETYPNPITAPEWSRHVNKKPSGAGPSPRGKRGPSHTPKQHRDRGI  
DFYFSRSKNL

>Morone\_saxa\_\_XP\_035521005.1

MVVNTIHWFRKGLRLHDNPALRDSIRGADSLRCVYILDPWFAGSSNVGINRWRFLFLHCLIEDLNSLRKLNSRL  
FVIRGQPTDVFPRLFKEWQINRLSYEYDSEPFQKERDAAIQKLACEAGVEVMVQVSHTLYNLVKIIEIENDGHP  
PLTYKRFQALINRMDAVELPAETITLEVIRNCATPISEDHDDKFGVPSLEELGFETEGLTTAIWPGGETEALM  
RLERHLERKAWVANFERPRMNANSLASPTGLSPYLRFGCLSCRIFYRLTDLYMKVKKNNSPPLSLYGQLLW  
REFFYTATNNSCFDKMEGNPVCVQIPWDRNPEALAKWAEQGTGFPWIDAIMTQLRQEGWIHHLARHAVACFL  
TRGDLWISWEEGMKVFEELLIDVDWSVNAGSWMWLSLSCSSFFQQFFHCYCPVGFGRRTDPNGDYIRRYLPILRG  
FPAKYIYDPWNAPEEVQKAAKCIIGVHYPKPMVNHAEEASRVNIERMKQIYQQLSSYRGLGLLATVPVHINNGG  
NGKRVDAGTRQGSAGSCETPSIQEGMTSAERGQFTQKRRREEVPLESSSKSWRHSK

>Morone\_saxa\_\_XP\_035526384.1

MLHCIWRSSSFPSARRTLSSPTSVMFSLRKPFSNSQTIMSDKKRKARSAAKEPSAKQQKLAATKEEKKGRAGGW  
LQELLEQQRTEKKEMKFNDKRLRFLSDTEKIKQGSEGVLYWMLRDHRVQDNWALVHAQRLAVEENLPLHVCVC  
LHVPESELSTLRHYSFMLKGLEEVAKECKALDIQFHLLHGSAGDVLPGFVSDRSLGTVVTDIFSPLREPLQWVE  
DLKKRLPKDIPLMQVDAHNIVPCWVASPKLEYAARTIRGKITKLLPEFLTDFPLVEKHPYTATRTAKPVDWDK  
TLTSLQLDRAVGETEWAKPGTKAGMAMLESFIDVRLKLFDTQRNDPNAPALSQSLSPWIRFGHLSAQORVALQVQ  
HSGKSAGQSVSSFIEELVVRRELTDFNFCFYNNKYDSVEGAYEWAQKTLKDHAQDKRPYLYTREQLEKAKTHDK  
LWNAAQYQVVTEGKMHGFLRMYWAKKILEWTSSPEEALSIALYLNDRYELDGQDPNGFVGCMWSICGIHDQGW  
AERPIFGKIRYMNYKGCLRKFNVAQFEKKYCPKNL

>Mucor\_lus\_KAF1806586.1\_FB192DRAFT

MTASKSVQVCFFRNVLRVHDNQSLFHALKAKPDADILPVVCLDPRMTDISILKNQGDNPVPKTWFFKLDRTKG  
FRSKFYYESIMDLKQQLVKRGSDLMILYGRPEEVFPRLKYLSTKKYQLENVHAPKEYAYEELLVEKALSKSM  
KGNVKKYHDSMMVHPDDDLDFAGERTYKVTYTHFRKRIEKMDHPVRAPLDIPEKLPAPFEAVWDFEHAKDGFKDL  
EALYKDIHVKKDSRSAFPWKGGEQSALDRLNSYVFKTHAVDEYKHTRNMGIMTEYSTKFS AFLAHGCLSPRLI  
WHQMDKFNQQRKRKRSVKAGGDDGGIYWVRFELLWRDFFRYLVEGYGSRVFMHGFNMEKSELAKEDDKKQV  
DNKPKPKNSYTDKVWKSNDQFNKWCNGQTGTFFVDACMRELLYTGFLLNNRGRQNVASYLAKDLEIDWRIGAE  
YFESMLLDHVDHSNYGNWQYVAGVGCDPREGFRHFNIIKQKGKDYDPGDYIKLWCPELEHLPTHFIHCPWLMT  
KEDQTKYKQIGRDYPEPMALFDTWIKHYPAATNGAITNYFQDNKKVKTEKK

>Musca\_dom\_XP\_005177055.1\_photolyase

MKRARGAEVENS KSAKKQTNDAAAKPSESSPGKSTSNFIDNFKQQRLECASDVLQFSFKKKRVRLSKDQEV  
EDCNGP VVYWM SRDMRVQDNWAFLYAQLALKLELPLVVVFCLVPKFSNATIRHYKFLGGGLEEVASECEELQ  
IPFQLLMGPAKERLLEFMKEHDGAAVVCDFAPLRVPLQWVDDVKVGLEKACKCPLIQVDAHNVPVWVASEKQ  
EYGARTIRNKINSKLPEFLTEFPVVKHKYKLKVALPNVDRKKAYESLECDMTVDEVPGIRPGYKAACKQLEE  
FCTKRIKLFGEKRNPTINALSGLSPWFHFGQISVQRCVLAVRLNKNKYKESVEAFCEEAIVRRELADNFCYY  
NKNYDNLKGLHDWAAKTLNDHRKDKRSPCYSLLEEFETAHTHDDLWNSAQLQLVKEGKMHGFLRMYWAKKILEW  
SESPEKALEIAILLNDKYSLDGRDPNGYVGCMSIGGIHDQGWAERAIFGKIRYMNYQGCKRKFDVNAFVVRY  
GGKAYHKK

>Musca\_dom\_XP\_005178207.1\_cry-1\_X1

MSVNIHWFRHGLRLHDNPALLEAISDKNRGIKLLPVFIFDGESAGTKCVGYNRFKFLDLSKDLDDQFRAISG  
GNGGRLYLFQGNPVQIFRSLHEKFRVHKLCFEQDCEPIWNERDNSVKALCHDLGIEAVEKISHTLWDPQTVID  
TNGGIPPLTYQMFLHTVQVIGLPPRPADDPDWTNVEFIQIEENLIKELRGFLEFPTPEQFKIFPEKLSYLAKT  
KWIGGETQALLHLRERLNVEENAFRCGRYLPNQASPNILES PKSMSAHLRFGLSVRKFYWDVHDLFRTVQLQ  
AEGFGMQMFGGAHITGQLIWREYFYTMSVNNPYDRMEGNAICLTIPWAPTNIQQLNRWTEGQTGFPLIDAAM  
RQLLAEGWLHHTLRNTVATFLTRGGLWQNEHGLRYFLKHLDDADWSVCAGNWMWVSSSAFERLLDSSLVTCP  
VALAKRLDPLGTIYIKQYVPELAKVPQLFIHEPWRMPLEEQEKAEC LIGVHYPSPMIDLT LATERNMKAMRDLR  
MSLTSAGAPDKTPPHCRPSNEEEVRHFFWLAD

>Musca\_dom\_XP\_005182773.1\_cry-1

MSEKSTLIHWFRKGLRTHDNPALFKIFEKSHADPQKYCIRPIFILDPSLLQWL RVGANRWRFLQ RSLDDL NKQ  
LMALNSRLYVVRGNPNNVFPRLFKEWQTELLTFEEDIEPFALKRDAEIKTMAREHKKVEVETFW SHTVFN PYTV  
MQKNMGKAPLTYQKFLGII EKMKAPEPLERPEKLRNNVCKDGEVEDEKCYDVPLLADLVKNMDELGEEKFP  
GGETEALKRLEASLSNVGWVTA FEKPNTAPNSLEPSTTVLSPYLKFGCLSSRLFHKKLSAILKANAKHSKPPV  
SLMGQLYWREFYYTAATGEPNFRDMIGNSVCMQIPWQTNDAHLEAWTYGRTGYPFIDAIMRQLRQEGWIHHLA  
RHAVACFLTRGDLWISWEEGQKVFEELLLDQDWALNAGNWMWLSASAFFYQYFRVYSPVAFGKKTDP TGAYIR  
KYVPELAKYPAGAIYEPWKVALGDQRKYGCVIGTDYPHRIVNHDIHVKENIKRMSAAYKVNREVKTGKEDQED  
GGGKKRKRDT SAGGNGPSGSKAKKKKK

>Mus\_musculus\_NP\_034093.1\_cryptochro

MAAAA VVAATVPAQSMGADGASSVHWFRKGLRLHDNPALLAAVRGARCVRVCVYILDPWF AASSSVGINRWRFL  
LQSLLEDLDTSLRKLNSRLFVVVRGQPADVFPRLFKEWGVTRLTFEYDSEPF GKERDAAIMKMAKEAGVEVV TEN  
SHTLYDLDRIIELNGQKPLTYKRFQALISRMELPKKPAVAVSSQME SCRAEIQENHDDTYGVPSLEELGFP  
TEGLGPAVWQGGETEALARLDKHLERKAWVANYERPRMNANSLLASPTGLSPYLRFGCLSCRLFYRLWDLYK  
KVKRNSTPPLSLFGQLLWREFFYTAATNNPRFDRMEGNPICIQIPWDRNPEALAKWAE GKTGFPWIDAIMTQL  
RQEGWIHHLARHAVACFLTRGDLWVSWESGVRVFDL LLDADFSVNAGSWMWLSCSAFFQQFFHCYCPVGFGR  
RTDPSGDYIRRYLPKLKGFP SRYIYEPWNAPESVQKAAKCIIGVDYPRPIVNHAETSRLNIERMKQIYQQLSR  
YRGLCLLASVPSCVEDLSHPVAEPGSSQAGSISNTGPRALSSGPASPKRKLEAAEEPPGEELTKRARVTEMPT  
QEPASKDS

>Mus\_musculus\_NP\_031797.1\_cry-1

MGVNAVHWFRKGLRLHDNPALKECIQGADTIRCVYILDPWFAGSSNVGINRWRFL LQCLELDANLRKLNSRL  
FVIRGQPADVFPRLFKEWNITKLSIEYDSEPF GKERDAAIKKLATEAGVEVIVRISHTLYDLDKIIELNGGQ  
PLTYKRFQTLVSKMEPLEMPADTITSDVIGKCMTPLSDDHDEKYGVPSLEELGFDTDGLSSAVWPGGETEALT  
RLERHLERKAWVANFERPRMNANSLLASPTGLSPYLRFGCLSCRLFYFKLTDLYKKVKNSSPPLSLYQQLLW  
REFFYTAATNNPRFDKMEGNPICVQIPWDKNPEALAKWAEGR TGFPWIDAIMTQLRQEGWIHHLARHAVACFL

TRGDLWISWEEGMKVFEELLLDADWSINAGSWMWLSCSSFFQQFFHCYCPVGFGRRTDPNGDYIRRYLPVLRG  
FPAKYIYDPWNAPEGIQKVAKCLIGVNYPKPMVNHAEEASRLNIERMKQIYQQLSRYRGLGLLASVPSNSNGNG  
GLMGYAPGENVPSCSSSGNGGLMGYAPGENVPSCSGGNCSSQSGILHYAHGDSQQTHSLKQGRSSAGTGLSSG  
KRPSQEEDAQSVGPKVQRQSSN

>Myripristis\_murd\_\_XP\_029904240.1

MAHTCIHWFRKGLRLHDNPALVAALRECKELYPVFVLDPYSYNSTHVGINRWRFLIGALKDLDCSLRKLNSRL  
FVVRGKPEEVFPKLFNKWNVTKLTYEYDTEPYSLSSTDKKVTTLAKEHGVEVIYKISHTLYNIDRIIEENNGKA  
PLTYNRLQSVVKTGLGPPKRPVPAPTIDDMKGVKTPYTDKHEKKYGIPTLEELGYDTASLSEEKFPGGGEQALK  
RLDEHMKRTGWICSFKEKPQTSPLNSLSPSTTVLSPYVTFGCLSARTFWWRRLTDVYQGGKHSDPPVSLHGQLLWR  
EFFYTASVGIPNFNKMVGNPVCTQIDWDNTNEYLAAWREARTGFPFIDAIMTQLRQEGWIHHLARHAVACFLT  
RGDLWISWEEGQKVFEELLLDGDWALNAGNWQWLSASAFFHQYFRVYSPIAFGKKTDKNGDYIKKYLPLKKF  
PAQYIYEPWKAAPRSVQQAAGCIVGKDYPHPVVEHEVISKKNIQRMKIAYAKRSPDLTESPSKKTGKKRKAPSV  
VDMLKKKK

>Myripristis\_murd\_\_XP\_029909413.1

MPPAAGVDDTKVLVRKMLRELLMGREDPEGFFGLCVSLLGHQDTRSQFPALIQPLSTANRSLHSTLTISIYLDY  
FSQDEDEHEMALSLSLLDVPAQYSSATKESRAQGPTDSRSLSAGIILSGSIQQSSASQPLGSSYAQLAASGG  
RKKHNTDLSRPEKLQKNTHSDKDVQGGTSQNVCVSQLHTSSPKQDTGTEEDRLVQEESELEKTEKPKRSKNRRQ  
RRKGGGQQVVGLPRSPSGPPVLLWFRDLRLCDNPALIGSLELGAPVIPVFIWSPEEEEGPGVTVAVGGACK  
YWLHQALSCFRSSLERIGSHLVFLETDRGKDVGSSSLQALKELVDETGARTVLANALYEPWLKERDDAVVSAL  
QRDGVECRMVHSYCLRDPYSVSTEGVGLRGIGSVSHFMSCCRQNPNGSGLGAPLDAPLSLPTPHWPQGVCCLDR  
LGLARMPRRKDGTTIDWAANIRSSWDFSETGAHARLEAFLQDGVYRYEKESGRADAPNTSCLSPYLHFGQLSP  
RWLLWDAKGARCRPPKFQORKLAWRDLAYWQLTLFPDLPWESLRPPYKALRWSSVRGHLKAWQGRGTGYPLVDA  
AMRQLWLTGWMNNYMRHVVASFLIAYLHLPWQEGYRWFQDTLVDADVAIDAMMWQNGGMCGLDHNFMHPVD  
AAMTCDPYGSYVRKWCPPELAELPDELIHKPWKCPASMLRRAGVVFQNYPERIVTDLEERRSQSLQDVALVRK  
EFAEYVDKRTGCDLVPLPPRLVSEALGLSQKGGGVVTTGKLFLLPVITRMEFKHQSDDPDADAASNPNYNAVLRK  
GYVSRKRDETI AFLNERDFTASVMYEGAQRERLES DYRRMEGLPRPSAPRGRARRTPAKDRFSIVPGGVVT  
SPR

>Myripristis\_murd\_\_XP\_029910364.1

MVVNSIHWFRKGLRLHDNP SLRDSIRGADTLRCVYILD PWFAGSSNVGISRWRFL LQCLEDLDASLRKLNSRL  
FVIRGQPTDVF PRLFKEWQISRLSYEYDSEFPFGKERDAAIQKLATEAGVDVMVQISHTLYDLDKI IELNGGQP  
PLTYKRFQALISRM DAVEMPAETITSEVMRKCATPISEDHDDKFGVPSLEELGFETEG LSTAVWPGGETEALT  
RLERHLERKAWVANFERPRMNANSL LASPTGLSPYLRFGCLSCRLFYFKLTDLYRKVKKNSSPPLSLYGQLLW  
REFFYTATNNPCFDKMEGNPMC VQIPWDKNPEALAKWAEGR TGFPWIDAIMTQLRQEGWIHHLARHAVACFL  
TRGDLWISWEEGMKVFEELLLDADWSVNAGSWMWLSCSSFFQQFFHCYCPVGFGRRTDPNGDYIRRYLPILRG  
FPAKYIYDPWNAPEEVQRAAKCIIGVHYPKPMVHHAEEASRLNIERMKQIYQQLSCYRGLGLLASVPANPNST  
NGSNAGGANTGTGTCPAASNEDPAMQEGTSQTGRDGFTSSLAQTFLFTVPQTQQTRYKISLHLSVYCVS

>Myripristis\_murd\_\_XP\_029930453.1

MLPRLCGRHVLKLLSQTKQSSCSPFTSLTKLSTSPPTMSAVKRKAPTSTKSPDAKQQKLAPHKKEEKERVEG  
WLQAHVLQQRDKKEMKLNKKRVYISDTQKIKQSGSEGVLYWMSRDHRIQDNWALIHAQKLAVAENLPLHICV  
CLVVPKSELSTLRHYTFMLKGLEEVAKECKTLDIQFHL LHGTAGQVLP GFVSDQGLGAVTDFSP LREPLQWL  
EDVKKQLPKDIPFIQVDAHN VVPCWVASGKLEYSARTIRGKITNLLPEFLTDFPPVVKHPCTATRTAKPVDWT  
KTLASLQVDKTVGEVSWATPGTRAGMAMLESFIDVRLKLFGTQRNDPNRAALSQ LSPWIRFGHLSAQRVALEV  
RRLGKNAGESVSSFIEELVVRRELT DNFCFYNNKNDYSVKGAYEWAQKTLKDHA KDPRPYVYTREOLEKAKTHD  
KLWNAAQYQMVSEGKMHGFLRMYWAKKILEWTS SPEEALSIALYLNDRYELDGQDPNGFVGCMWSICGIHDQG  
WAERPIFGKIRYMNYKGCLRKF DVAGFEKKYCPKNL

>Myripristis\_murd\_\_XP\_029935360.1

MSTSRTIICLLRNDLRLHDNEVFHWAQRNAEYIVPLYCFDPRHYLGSYNYNLPKTGPFRRLRFLQESVRDLRNT  
LLKKGSTLLVRRGKPEDVVADLIKQLGSVSAVALHEEVASEERDVEKGVKDICAQMKVKVHTCWGSTLYHRDD  
LPFPFIARLPDVYTQFRKAVETQSRVRPLIPAPEQLRPVPPGLEEGA IPTAEDLGQKEPLSDPRSAFPCSGGE  
SQALARLKHYFWD TDAVAKYKETRNGLIGVDYSTKFAPW LAMGCISPRYIYHQINQYERERTANQSTYWVIFE  
LLWRDYFKFVGKYGNRMFHIKGLQDKSVPWKMDMKLFSAWKEGRTGVFPVDANMRELAMTGFMSNRGRQNVA  
SFLT KDGLDWRMGAWEF EYLLVDHDVCSNYGNWLYSAGIGNDPRENRKFNMIKQGLDYDSNGDYVRQWVPEL  
QGIRGADVHTPWTLSAALSHAQVSLGETYPTPIVMAPEWSRHVNKKPSGAGPSARGKKGPSHTPKQHRDRGI  
DFYFSKSKNL

>Mytilus\_edul\_\_CAG2201599.1

MSKGDAKELNMPPQDFNNRHGNVSVHWFHRLRLHDNPALLEALKNCTEFYPIFIFDGEVAGTKHVAFNMRMF  
LIESLEDLDRNLRKFGGRLYVFH GQPV EILT NFLKEWGVTKLTFEQDPEAVWKQRDDAVKELCERKEIECVER  
NYRKNDGQPPLTYSLFNLVASALGDPPRPVSYPVFHNIDLPVYPDHEKKFGIPKPQTVGVFPDCKEQNNRINE  
WKGGESKALD LLEKRLALEKKAYEDGYVLPNQYIPDLLGEPMSMSAHLRFGLSVRRFHW TIHDLFEKV KPE  
SKPDALTCQLIWREYFYVMSANNINYDKMEGNPICLNIPWYRNDEILKKWEMGQTGYPWIDAIMNQLRHEGWI

HHVGRHAVACFLTRGDLWISWVDGLKIFLKYLIDADWSVSSGNWMWVSSSAFEKVLQCPKCFPCVGYGRRMDR  
TGEYIRRYLPVLKDMPLRYLFEFPWKAPLAVQQKAHCIVGKDYPHPIVNHKEASNECASAMNKVIESFKGKEVP  
HCAPSDDLEVRRFVCLPDFVSTGGKCTANQLCPGIENL  
>Mytilus\_edul\_\_CAG2210639.1  
MPRNNKKQILHWFRKGLRLHDNPALKEALKGADTYRCVYILDPWFAGSTQVGIKWRFLQLQCLEDLDAALRKL  
NSRLFVIRGQPTDVFPRIFREWNITTLSEEDPEPFGKERDAAIRHLAKEAGVEVIVETSHTLYELQKIISYN  
NGVPPLTYKRFQAILSKMDPPKQPEDTITRQFIGHTKTPISEDHDDKFGVPSLEELGFDTEGLGPTIFRGGET  
EALARLERHLERKAWVASFEKPKMTTQSLFPSQTALSPYLRFGCLSSRTFYWKLRELFRKVKKSSDPPLSLHG  
QLLWREFFYSAATNNPNFDQMTDNPICVQVPWDKNPEALAKWAEIDAMDSYAWGGYDHSVACFLTRGDLWISW  
EEGMKVFEDELLLDADWSVNAGTWMMWLSCSSFFQQFFHCYCPVGFGRRADPSGDFIRKYLPVLKAFPPKYIYEP  
WNAPESVQKAACKIIGKDYPSPMVNHAEVSKVNTERMKQVYQHLALRASAAASIPKPLHEEFAKHGKGHSGN  
HPSKMPMAVGNNYTHSQTSEENHPPQFRGYNMTTN  
>Mytilus\_edul\_\_CAG2223839.1  
MLRNIKRLFDHTSSLICTTLKETCFKLQTTQQSLTPFKLSSEKLKSVLFNSQLFYSEIYLFKAHHNASVRQP  
QVRFFSSLPNLDRAEKKALSARKKVDSDENPTEKKQKLETSDIKSDNFIEKISTSRSNVCKSISEFKFNKK  
RVRVLSKAKDFPEDSQGVVYMSRDQVRVDNWAFLYAQKLALKMEVPLIVCFCLVPKFLEATIRHYHFMMEGL  
KEVEQDCNKLEISFHLLIGYAKDVLPQFVTDNDIGGVVTDDFSPLRMPMQWVDDVTTAIPKNIPICQVDAHNIV  
PCWEASPKLEYGARTIRNKIHNQLSGYLTEFPPVCVHPFTPKEKQPQSIDWVKIEASLTVDRTVGPVDWAVPGS  
TAGLQMLESFCKERLKYFSKDRNNPNKIALSNLSPWIHFGQISVQRSILIVKQYRSKYKEGVEAYIEEAIIRR  
ELADNFCFYKNKYDSIEGAYDWAKTSLKLHEKDKRKYLYTREKLEKGQTHDDLWNAAQIQMTIEGKMHGFLRM  
YWAKKILEWTGSPTEALETAIYLNDRFNLDGRDPNGYVGCMMWSICGIHDQGWKEREIFGKIRYMNYDGCKRKF  
DVAAFVRKYRGKKL  
>Mytilus\_edul\_\_CAG2240703.1  
MASKSRIAICLLRNDLRLHDNEALSWAFKNADFVVPPLYCFDPRHYKGTWHFNLPKTGSHRLKFLLESVSDLRN  
SLRLKGSNLIVRVGKPEVIVPELVKTLSDVQNLVFHEEVTYEELKVEKALNHSGIDVKTFWGHTLYHKSDLSE  
SVNNLPDVYTQFRKSVEAKCPVRKIIDVDDVKPVEGLEEGQIPTMEDLGKSVVPVDPRGALNFKGGETVALD  
RLNHYLWETDKVATYKETRNGMIGADYSTKFSIWLAHGCISPRKIYWEIKRYEQERTANQSTYWVIFELLWRD  
YFRYVALKYGNQIFYEGGVQNKRIIPWKQDKAMFEAWKDGRGTGVYVDANMREMAATGFMSNRGRQNVASFLTK  
DLKLDWRMGAEFESLLIDHDVTSNYGNWLYSAGIGNDPREDRKFNMVKGGLDYPDGEYVRLWVPELEKIKD  
GSVHHVWTL PNSVLSRAEVS LGETY PNPIVIAPEWSRHTNKKSGRNQ GPPQKQNKGMDFYFKGSQKH  
>Mytilus\_edul\_\_CAG2248635.1  
MSSVWFSLGRESQEILNQYSNGSCEADECFCMIMSIEGYDKTRNHFINFIENLKITKPILHNGLVTVFKNYFS  
ETEALHSKSNEAVGCSVENGF LTSDFGFELDMELAKSLSLSDSNPKKTS GNTPSLYDSSNEPSGSASHSITKK  
PKNNKSTPDSLNGNIEKNDGHTKTSIPGLQVANLSNHKHKKKKKKGNALPRQISNPPVIYWLRRDLRMYDNPA  
LVAAASSNAPVILVFIWSDHEEDPLDVVATGGATKLWLHYALKFLNQSFVEKFGNGILYNTKTEDSHNIMKQ  
IIQQTGANTLFINDEVYEPFLKERDDALCNKLTSGIQCNRFHSHYLLHEPSSINTESLGMRGIGSVTHFMECSR  
QSSVEPIGHPIESP GILPKCTSLPNSQTLDELELAKMPRRKNGSVIDWAAPIVKSWNFSE DGAWDALGSFLTE  
GIKKYEKESCRADHVNTCRISPYLHFGQISPRAILTEAKHMKSPKFLRKLAWRDL SYWLLSLWPDLP SQPTRP  
QYRHQRWSKNKSHLKAWQRGNTGFPLVDAAMRQLWLTGWMNNYMRHVVASFLISYLHLHWIEGYRWFQDTLLD  
ADVAINAMMWQNGGMSGLDQWNFVMHPIDAAMTCDPDGT YVRQWCPELASVPKEFIHQPWKCPPS IMKRCKVE  
LGNQYPNRVITDLEVAREQSLQDVVEVRKKFPDFVDRRSGNDLVPVDNGRLLIPVITRMEFKYKTTNPEAKDN  
PHTAVLRGYRSRKRDEAIAFANERDFLASTMNECVQRQERHQKALKQGNF  
>Mytilus\_edul\_\_CAG2250086.1  
MTKRSIHWFRKGLRLHDNPALLAACENAVDVKPIFILD PWFASSARVGVNRWRFLIQTLQNL DQSLKNTILGT  
FVTCCKGYPRRSFP ELFKQWETHLT FEFDIEPYAKVRDAAVKALAEKSGVEVMTCVSNTLYD TDKVIKANGG  
NPPLTYQRLQTVLSKMGAPPKPVEGPK EIKTKIAANHDTEYGVPTMADLGKDDSECGPLLP GGESEGLKRLD  
TMMKKQYYYYSLYYLYLNWVCKFEKPKTEPNTLSPSTTVLSPYLKFGCVSARTFYHDVQNVYRQNK NHTQPPTS  
LLGQLFWREFY YVIASVSPNFDKMEGNPICTQVDWDDNKEYLNAWREGKTGYPFIDAIMIQLKTEGWIHHLAR  
HAVACFLTRGDLWCHWEEGMNVFEEWLLDADWCLNAGNMMWLSASAFFHQYFRVYSPIVFGKKT DKGNYIRK  
YLPQLKHFP TQYIYEPWTA PLKVQE KAGCVTEKRKTESSEDGTPKKRRKTEGKNSKITDFVKKSK  
>Mytilus\_gallopr\_VDI43893.1  
MASKARIAICLLRNDLRLHDNEALSWAFKNADFVVPPLYCFDPRHYKGTWHFNLPKTGSHRLKFLLES MVETGV  
PYVDANMREMAATGFMSNRGRQNVASFLTKDLKLDWRMGAEFESQLIDHDVTSNYGNWLYSAGIGNDPREDR  
KFNMVKQGLDYPDGEYVRLWVPELEKIKDGSVHHVWTL PNSVMGRAEVS LGETY PNPIVIAPEWSRHTNKK  
GRNQ GPPQKQNKGIDFYFKGSQKH  
>Mytilus\_gallopr\_VDI68070.1\_cryptochro  
MADLGKDDSECGPLLP GGETEGLKRLDTMMKKTNWVCKFAKPKTEPNTLAPSTTVLSPYLKFGCVSARTFYH  
DVQNVYRQNK NHTQPPTSLLGQLFWREFY YVIASVSPNFDKMEGNPICTQVDWDDNKEYLNAWRE  
>Mytilus\_gal\_VDH90443.1\_cry

MRKFSQRRHLVINRILVLNIEKEHRSKIIIEKNDGQPPLTYSLFNLVASALGDPPRPVSYPVFHNIDLPVYPDH  
EKKFGIPKPKQTVGVFPDCKEQNNRINNEWKGGESKALDLEKRLALEKKAYEDGYVLPNQYIPDLLGEPMSMSA  
HLRFGLSVRRFHWTIHDLFEKVKPKESKPDALTCQLIWREYFYVMSANNINYDKMEGNPICLNIPWYKNDIEI  
LKKWEMGQTGYPWIDAIMNQLRHEGWIHHVGRHAVACFLTRGDLWISWVDGLKIFLKYLIDADWSVSSGNWMW  
VSSSAFEKVLQCPKCFPCVGYGRMDRTGEYIRRYLPVLKDMPLRYLFEPWKAPLAVQQKAHCIVGKDYPHPI  
VNHKEASNECASAMNKVIESFKGKEVPHCAPSDDLEVRRFVCLPDFVSTGGKCTANQLCPGIENL

>Mytilus\_gal\_VDI01404.1\_cry

MPRNNKKQILHWFRKGLRLHDNPALKEALKGADTYRCVYILDPWFAGSTQVGIKWRFLQCLEDLDAALRKL  
NSRLFVIRGQPTDVFPRIFREWNITTLSFEEDPEPFGKERDGAIRHLAKEAGVEVIVKTSHTLYELQKIIISFN  
NGVPPLTYKRFQAILSKMDPPKQPEDTITRQFIGHTKTPISEDHDDKFGVPSLEELGFDTEGLGPTIFRGGET  
EALARLERHLERKAWVASFEKPKMTTQSLFPSQTALSPYLRFGCLSSRTFYWKLRFLFRKVKKSSDPPLSLHG  
QLLWREFFYSAAATNNPNFDQMTDNPICVQVPWDKNPEALAKWAEGKTGFPPWIDAIMTQLRQVGWIHHLARHSV  
ACFLTRGDLWISWEEGMKVFDELLEDADWSVNAGTWMWLSCSSFFQOFFHCYCPVGFGRADPSGDFIRKYLP  
VLKAFPPKYIYEPWNAPEVQKAAKCIIGKDYPLPMVNHAESKVNTERMKQVYQHLALRASAAASIPKPLHE  
EFAKHGKGHKSNGHPSKMPMAVGNNYTHSQTSEENQPQQFRGYNMTTN

>Mytilus\_gal\_VDI14359.1\_photolyase

MEYGRTRPQHNSYLNHGYDEDQDEGSDVLAHSISDQSDGEMEDTNQTFQTETEOMRQROETSRKKS VKQLMDS  
ITSLELDGTLSSPSWWKASSSRIPSRVYLRAEIVKNFSACYEHCDNISDCNKLEISFHLLIGYAKDVLPPQFV  
TDNDIGGVVTDIFSPLRTPMQWVDDVTTAIPKNIPICQVDAHNIVPCWEASPKLEYGARTIRNKIHNQLSGYLT  
EFPPVCVHPFTPKEKPQNVDWAKIESSLTVDRVTGVPDWPATPGSTAGLKMLESFCKERLKYFSKDRNNPNKIA  
LSNLSPIWHFGQISVQRSILIVKQYRSKYKEGVEAYIEEAIIRRELADNFCFYNNKYDSIEGAYDWAKTSLKL  
HEKDKRKYLYTREKLEKGQTHDDLWNAAQIQMTIEGKMHGFLRMYWAKKILEWTGSPTAELETAIYLNDRFNL  
DGRDPNGYVGCWMSICGIHDQGWKEREIFGKIRYMNNDGCKRKFDDVAAFVRKYRGKKL

>Myxococcus\_xan\_WP\_201420854.1\_photolyase

MPEGFSWSELGVDSARVQVVKDLPLPSGRDFVLYWCMVNHRAEQNHALDAAIGLGNNLGLPVVVYQAIRPDY  
PHASDRLHAWALEGMMDMATGCAARGLPYWLELPRTSKEHRPRLAQLGRRAAAIVSDLFPTYIIPGHLRGAAG  
ALDVPLFAVDASCVVPMQRIATRQIGAHTLRPKLKKLWPEYLDRAVPNRAVKAAATGRKLEPDFATSDAREAR  
ESLDAFDFDHSVAPIQERGGGRKAGLEALQAFVHQRLLEGYDEGRNDPGLARQSNLSPFFHWGNLFAGEAARAAI  
RARGAQDASVQGFELELLVRRELGFNYCFHTPGPQQLSVASLPPWAKETLTRHQKDAREHRYSLKQLETARTA  
DGLWNAAQRELVERGRIHNYLRMLWGKKILEWTPSPQEQALQRIAFNLNDKYAVDGRDPASVANFMWVLGLHGRP  
FQERQVLGKVRPMSSSLRTAAKYNLAPYLERWGRPEDPPVKLRVRKTAGP

>Naegleria\_fow\_KAF0984536.1\_FDP41\_0004

MLQQSLARGGMNTTKVIGLWFRNDLRIHDHEAFSKAVQQARTEQKKILCLYVFDRSITTQPSPYSLSQLEESC  
GPRRCKFLVESVQNLF SKLNGRMMLSVLPFQTLKEE EPSASRTERPYSIEKVREFAAELIQKFNISDLYMNR  
EFCMFEEKEMEKEIEKVCKKKNVKVNWTWSNCLVHGDDL PYDNFPEDI PKTFSAFRKKIEQKLANHKDTIRKVF  
EMEDDFRDFLLTSEEIQKHAQTL SMIDLND FQDIEAFMKKHLFPHMSHDQFLSEIKQDQRGIIKFIGGEDTAL  
ERCHSYINKNLKNYSTTRNNNLGDYSTKLSPWLALGCISARYIYHEIKKTSKTEEKSSSASVLINELLWRDY  
FKMLAWKMGRSFFFKALQPSKNLEYEWKIPSDGYKNAQFQAWCQKGTGYPFVDACMKELLHTGFMSNRGRMV  
VASFLVKDMNIDWRLGAEYFERNLLDFDASSNVGNWCWVAGVGCDFRPRYFNPIKQGMHDHKEGKYVKQWIPE  
LEKVPHNAIHLPYLLLGGENEKKILKVPKHYSNKENLVCSVALPSALKRKFEEKGESSTTKKRK

>Naja\_naja\_\_KAG8125988.1

MNLVPSGCTGLVLSSLAPDHPKNGRHFAWPAGPQEHKREKERERRHRKPRGRSLAGNAASGRDPPRNAAREKC  
AQAGQQAVDSSAPGTGAPKRLTGFDQRQAGAQPRLLRARNPEARNRLSGKHRVEARARARARSCFRQSATAGPLSV  
ERLASSAHAAQQGGCAAGRRAKERGSGRSGAAAPDANILGNDLKCLSPHPSAPSRGAGLRQRLGNMNRVQLK  
RSAILKMALGGASEPLLQQQQEEEEEDSEGSSSSNNNSSKEPPFLLRAVQIAVVVCLYWFISITMVFLNKYLL  
GSPSLRLDAPLFVTIFYQCLVTVLICKLLSLLASCCPPGFVDFPSIRIDLKVSRSVLPLSVVFIGMITFNNLCL  
KFVGVAFYNVGRSLTTVFNVLLSYLLLKQTTSVFALLSCGIIIGGFWL GIDQEGAEGTLSWAGIIFGILASLC  
VSLNAIYTKKVLPAVDGSIWRLTFYNNFNACILFLPLLLFTIRGQPTDVFPRLFKEWGVTHLTFEYDSEFPFK  
ERDAAIVKLAKEAGVEVTTENSHTLYDLDRILNGLHKKPPLTYKRFQAIISRMDLPKKPVSTITSQMEMYKT  
EIQENHDETYGVPSLEELGFPT EGLAPAANVANYERPRMNANSLLASPTGLSPYLRFGCLSCRLFYRLWELY  
KKVKRNSTPPLSLYGLLWREFFYTAATNNPKFDRMEGNPICIQIPWDRNPEALAKWAEGKTGFPPWIDAIMTQ  
LRQEGWIHHLARHAVACFLTRGDLWISWESGVRVFDLLEDADFSVNAGSWMWLSCSAFFQOFFHCYCPVGF  
RRTDPSGDYIRQYLPQLKGFPSRYIYEPWNAPEVQKAAKCIIGVNYPKPMVNHAETSRLNIERMKQIYQQLS  
RYRGLCLLASVPSCIEDFSNITDLSAHGSCNKTTLRQSHCTSPKRKCYAGEENSEELHKRARIMHVSTSCG

>Naja\_naja\_\_KAG8136345.1

MVHEGKMHGFLRMWYAKKILEWTRSPPEALQFSIYLNDRYELDGRDPNGYVGCWMSICGIHDQGWAEARAIIFGK  
IRYMNAYGCKRKFDDVAFQFERKYRPQRFTQ

>Naja\_naja\_\_KAG8138221.1

MGEKAWKYMDVQQSEYIILNLKSSAMAAAFVHSQVPTTILVHEKLRFLQCLEDL DANLRKLNSRLFVIRGQP  
ADVFPRLFKEWNISKLSIEYDSEFPFKERDAAIKKLATEAGLEVIRFQTLISRMEPLEMPVETITAEVMSKCA

TPVSDDHDEKYGVPSLEELGFDTDGLPSAAWVANFERPRMNANSLLASPTGLSPYLRFGCLSCRLFYFKLTDL  
YKKVKKNSSPPLSLYGQLLWREFFYTAATNNPRFDKMEGNPICVQIPWDKNPEALAKWAEGRGTGFPWIDA  
QLRQEGWIHHLARHAVACFLTRGDLWISWEEGMKVFEELLLDADWSVNAGSWMWLSCSSFFQQFFHCYCPVGF  
GRRTDPNGDYIRRYLPILRGFPAKYIYDPWNAPEGVQKAAKCIIGINYPKPMVNHAEEASRLNIERMKQIYQQL  
SRYRGLVPSNGNGNGNGNGNGGGLMGYSSSENLP GC VGTSGTQMG TSEGHTGNVQ SCTLGETHKGTS  
GIHQ

>Nanorana\_parkeri\_XP\_018410013.1\_PREDICTED:

MEGPSVSSVHWFRKGLRLHDNPALLAALRGACCVRCVYILDPWF AASSASSGGVNRWRLLLQSLEDLDSNLRK  
LGSRLFVVRGQPADVLPRLFKEWGVTRLTFEYDSEPFGERDAAIMKLAREAGVEVIVENSHTLYNLDKIIEL  
NGNSPPLTYKRFNAIISRMEIPRRPVPSITRQOMETCRAEIKSTHDETYGVPSLEELGFPRDNPAAVWP  
GGETEALARLDRHLERKAWVANFERPRMNANSLLASPTGLSPYLRFGCLSCRLFYRLRELYQKVKKNSSPPLSLF  
GQILWREFFYTAATNNPKFDQMEGNPICVQIPWDKNPEALAKWTEGKTGFPWIDA  
QLRQEGWIHHLARHAVACFLTRGDLWNSWECGVKVFDEMLLDADFSVNAGSWMWLSCSSFFQQFFHCYCPVGFGRRTDP  
SGDYVRRYL PVLKGYP SRYIYEPWNA PMSVQKEAKCIVGIDY PKPIVNHAEASRLNIERIKQTYQQLSRYRGLCILASVPSC  
VEDLSGPITDPTSSQQGSSDPAPKLSLCAADFPKHKHTDEEPCCKARLQSVQETERTTKDF

>Nanorana\_par\_XP\_018408992.1\_cry\_DASH

MCAAAARVIVCLLRNDLRFHDNEVLLWAHRNADHIVPLYCFDPRHYLGTHYYNFPKTGPLRFKFLLESVQDLRN  
ALKKRGSNLLLRRGHPEDVIEDLIKQLGPVSAVAFQEEATKEELDVEKSVKQVCARHGKVQSIWGSTLYHRD  
DLPFRHISSLPDVTYQFRKAVETRCKVRPTLQMPDKLKS LPAGLEEGPVPTLED FQGQDPLMDPRTAFPCSGG  
ESQALQRLDYYFWDTNLVASYK DTRNGLIGMDYSTKFAPWLAFGCISPRYIFEQIRKYEKERTANQSTYVWIF  
ELLWRDYFRFVALKYGRRIFFLRGLQDKEVPWKDQQLFDWKEGRTGVPFVDANMRELAMTGFM SNRGRQNV  
ASFLT KDLGIDWRMGAEWFEYLLMDYDVCSNYGNWLYSAGIGNDPREN RKFNMIKQGLDYDGN GDYIRLWVPE  
LQQIKSGDVHTPWALSSSALAHANVTLGTTYPPIVMAPEWSRHINQKPD SGAAPAKRKGSSYTPKQHKNGK  
IDFYFSRNKDI

>Nanorana\_par\_XP\_018410887.1\_uncharacte

MKDDFRWLYNRVEDREERPQSTMERSGHPVLPDISCMKQQLMQGEIQAEFFFCMILSTMGDNTTHRHFPDLIQ  
SLSKVYPGLHDQLMSIHRAYFLQRPSEQTYEEEELELAVALSLQEAQSAAGSGCTIPYPVSSSRVSFAEAAKKS  
SLPQSTGDPKPSSTAKWGNVRGDSANEELSKNLAKLQTTNHLDSL YSGQPEPEDCVLHCDGREIYPIQSPIKK  
EDKMKRNRGRRKKNSSVQRNPVRMKAVVWFRRDLRLHDNPALIAALELGAPIIPVFLWSLSEEKGQNF  
TLATGGATKYWLHHALAQLNLALAQNYGSHIVFRVNDSCADELLHLVQETGAGTVLVNAVYEPWLKDRDDL  
ISETLKGQGVTF TKYHSYCLYEPYSVSSEGVGLRGIGSVSHFLSCCERNSSSTPIGDPLEAPTSPLPSCWPD  
SLELDR LDLAKMPRRKDGTVVDWAATIRKSWDFSEDGAYTCLGNFLEDGIKHYDKESGRADKPYTSHISPYLHFGQ  
ISPRTVLHEAYFTKKSVPKFLRKLAWRDLAYWLLVLFPMHVEPV RWAYKSQRWSSDQSHLQAWQKGMTGYPLVDA  
AMRELWLTGWMCNYSRHVVASFLVAYLHLWHIGHYRWFQDTLV DADVAINAMMWQNGGMSGLDHWNFVMHPVD  
AALTCDPCGSYVRKWCPELAGLPDEHIHKPWKCPPS QLRRAGIALGQNYPHRIIVDLEERREQSLRDVVEVRQ  
KHSEYVDKVS GSDMVSVDQLLALTLCPCDGD DDLIKSHTGRFLLPVITRKEFKYKTLQPDTKDNPYNTVLKG  
YVSRKRDETI AFMNERHFTASTINEGAQMYERRERTARLMEGLPQVRDPKNKSRRTPRSDPLSIIPPAYFHLA  
N

>Nanorana\_par\_XP\_018413653.1\_LOW\_QUALIT

MGVNAVHWFRLGLRLHDNPALRECIQGSDSVRCVYILDPWFAGSSNVGINRWRFLQCLELDANLRKLN  
SRLFVIRGQPADVFPRLFKEWKISKLSIEYDSEPFGERDAAIKKLATEAGVEVILSISHTLYDLDKIIELN  
GGQPLTYKRFQTLISKMEPLEMPAETITA EVM DKTTPVSDDHDEKYGVPSLEELGFDVEGLPSAVWP  
GGESEALTRLERHLERKAWVANFERPRMNANSLLASTTGLSPYLRFGCLSCRLFYFKLTDL YKKVPXYIFNPP  
XXALNWXFYTAATSNPRFDKMEGNPICVQIPWDRNPEALAKWAEGRGTGFPWIDA  
QLRQEGWIHHLARHAVACFLTRGDLWISWEEGMKVFEELLLDADWSVNAGSWMWLSCSSFFQQFFHCYCPVGF  
GRRTDPNGDYIRRYLPILKGFP KYIYDPWNAPEAVQKAAKCIIGVNYPKPMVNHAEEASRLNIERMKQIYQQL  
SRYRGLGLLASVPSPNPNNGNGG LMSYSPGDNMPGCSNNGGSLMGTS DGASTSNPNNNNQGESHTGIGGIQGYWQ  
GSSILHYSHGDSQQSYLIQGRNAMNSVMSFGKRPSPEETQSIGPKVQRQSSH

>Nanorana\_par\_XP\_018420471.1\_cry-1-like

MTHRSIHWFRKGLRLHDNPALLAAMKDCAQLHPIFILD PWFPRNM RVSVNRWRFLIEALKDLDENLKKINSRL  
FVVRGKPAEVPALFKKWKVTRLTFEVDTEPYAKQ RDAEIERLAAEHNVEVIQRVSNTLYDVERVIAENNGKP  
PLTYVRLQTVLQSIGPPKRCPKAPT KDDMKDCCTPWKPSYDEKYGVPTLEELGQDPSQVGPLLYPGGETQALQ  
RLDLNMKRTAWVCNFKKPDTEPNSLTPTSTTVLSPYMKFGCL SARLFYWRLAEIYQKKHSAPPVSLHGQLLWR  
EFYYVAGAGIANFDMEGNSVCVQLHLLYSLLYWQQWRSARTGYPFIDA IMTQLRTEGWIHHLARHAVACFLT  
RGDLWISWEEGQKVFEELLLDADWALNAGNMMWLSASAFFHQFFRVYSPVAFGKKT DKNGEYIKKYL PFLKKE  
PAEYIYEPWKAPRSVQERAGCIIGKDYPKPIVVHETVSKQNIQRMKAAYARRSGASAAKTEGASPKNKKGERN  
GSVLQH

>Nanorana\_par\_XP\_018427648.1\_photolyase

MPPKVKPSKSKKEESGSEKSDGSQKNGKMLAPKPKSSGTAKIPAKRKAEGSATGKSKAISGASSSESSD  
VDAK KKKKPEKRDDAEGGDFFD SVKKSRLATAASVSDFKFNKKRVRLVSAEENLKDDAQGIIYWMSRDQ  
RVEDNWAF

LYAQRLAAKQKLPLHVVFCLVPKFLNATIRHYGFMLKGLKEVAEDCKELNIPFHLLIGYAKDVLPDFVKENSV  
GGVVTDFAPLRVPMQWVQEVSERLPKDVPLVQVDAHNIVPCWVASVKQEYGARTIRRKIHDQLSQFLTEFPPV  
IKHPYDAMFKAEPIDWEACYASLEVDRITVKEVEWAKPGSKAGVEMLSQSFITQRLKSFNSDRNNPNQQA  
PWFHFGQLSVQRAILEVQKYRSCKESVDSFVEEAVVRRELADNFCYYNKNYDKVEGAYEWAKKTLKDHEKDK  
RTPIYSLEKLESKTHDPLWNAAQLQMVHEGKMHGFLRMYWAKKILEWTNSPEEALKFAIYLNDRYELDGRDP  
NGYVGCMMWSICGIHDQGWAERAIFGKIRFMNYQGCKRKFDVAQFERRYHPKKFAQC

>Nasonia\_vit\_XP\_008204431.1\_cry-1\_X1

MTGSQGNDIGCEISCRADIYQQPQKQLQQQHQQQSQIQQPSPPLVNNDTKSDGLAIQGDGKKHTVHWFRKGL  
RLHDNPSLREGLAGASTFRCVFLDPWFAGSANVSINKWRFLQCLEDLDRSLHQLNSRLFVIRGQPADALPK  
LFREWGTSTLTFEEDPEPYGRVRDENITTLCKELGITVQVRSHTLYKLDEII EKNGGKPLTYHQFQNVIA  
MDPPEYPAAAVTAACIGSAYTPLKDDHDDFFGVPTLEELGFDTEGLMAPVWVGGETEALARLERHLERKAWVA  
SFGRPKMTPQSLLPSQTGLSPYLRFGLSTRLFYYQLADLYKKVGFYIFKDKYICILRLHFKQLYGFWTFIQI  
KKTIPPLSLHGLLWREFFYCAATNNPNFDRMHGNPICVQIPWDKNVVALSKWANGQTGFPIWIDAIMTQLREE  
GWIHQRLARHAVACFLTRGDLWISWEEGMKVFDELLLDADWSINAGMWMWLSCSSFFQOFFHCYCPVRFGRKAD  
PNGDYIRRYLPVLKNFPTRYIHEPWNAPLSVQRAAKCIIGQEYALPMVNHSKSSRINVERMKRVYQQLSKYRA  
NGVSLKGETIGLLSIVPTTSPSLPFDQQQQQQDDDKKQQQNSLNVNDSNNDCPASHLHQQLQQHVHQHYH

>Nasonia\_vit\_XP\_031784876.1\_photolyase

MAPCIFVTKLIAIKYLSKTNFTVTKATSSSTNFKMSGPSTKKLRTSHTDLVKQIEEQRNQTADSVMTFKFNKKR  
VRILTDSDEVSSSESKGIVYWMFRDARVHDNWAMLFAQKIALKNKVPLHVCFCILPKFLDATIRHYKFLLEALE  
EVEKDCKELNINFHLLHGEPNTAIINFVEKYKMGAVIADFFPLRLPLFWLEDIKKKLPKKIPLCQVDAHNIVP  
CWVASEKLEYAARTIRNKINSKLDEFLEFPPIKHPHTSDQKFDKINWDTALDDVLVDKSVDKITWAKAGYK  
GGIAELDKFLKIRLRIYDEKRNPIFNALSNSLPWFHFGMISVQRCILEAKKYKSQYNKSVEAFMEEAIVRRE  
LSDNFCFYNEHYDSLKGAYDWARETLNQHRNDKRDYIYTLNELENGLTHDDLWNAAEIQLVKEGKIHGFLRM  
WAKKILEWTETPDALKWSIYLNKYSMDGRDPNGYVGCMMWSICGVHDQGWRRERPVFGKIRYMNYKGCERKFD  
VQAFVMKYGAKVQLTKDENKRKGKKK

>Nematostella\_vec\_XP\_001623243.2\_cry\_DASH

MRITLTRLQKGIVTMATSKTQKTVICLLRNDLRYHDNEALLWAHKNADFVLPLYCFDPDHYKTTWRFSLPKTA  
QYRAKFLLESVTDLRSTLQIHGSNLIIRQCQPLEAVTKLTELLKPVPAPVTSIVFQQEVTYEELNVEKALVEFC  
KKSGIHMHTIWGSTLFHKDDIPYKAKTVPDTYTQFRKGVENQSTVRNLIDMPKNLKLPLPPVKGELGTIPDLKS  
LLNDSEIKEVDQRSAPPFMGGEQEALSRLGSYLWGTDVAKYKETRNGLLGENYSTKLSPLWANGSLSPRMVY  
HRIKQYEEERVANHSTYWVLFELIWRDYFKFVCLKYGDRVIFYRSGIMGKSLPWKHKMTFKLWCEGKTGVFPV  
DANMRELKETGWMNSNRGRQNVASFLLIKDLGLDWRYGAEFESLLLDHVCNSYGNWNYAAGIGNDPREGRKF  
NVKQGLDYDPDGDYIKTWPELAKIPGAKVHVPWTLKPGELRSSGVELGVTPNPPIVIAPEWARHTSKTISGK  
KPSNFPNRQKGVDFYFKSANNGPSGSR

>Nematostella\_vec\_XP\_001636254.2\_photolyase

MASDEPAARRKQEVTPGNKSELDQLDDIVKTYKEKRMSVCNSVTDKFNKKRVRMLSKEGSISENQCGGVVY  
WMWRDQVRVQDNWALLYAQLRALKQQAPLHVCFCPLPSNFLDATLRQYNFMIKGLQEVEKELKELEISFHLLLG  
PGKVLPEFVKSAGIGGIVVDFCPLRLPTQWVNDVVKAVPKDVPVCQVDAHNIVPCWHAHPKLEYGARTIRPKI  
HKVLTEFLTEFPPIKHSVSGEKTKTDDWDAVDTFIEVDRSVGEVDWAKPGTAEGLFMLESFCKDRLKYFHS  
SRNDPTKRALSNSLPWFHTGQISPQRAILRVRDFRSKFRESVESFIEECIRRELSNFCYYNNEKYDSIEGT  
NEWARKTLDNHAKDKREYLYARGKLEKAQTHDDLWNAAQRQLVREGKLHGFLRMWAKKILEWTDSPETALSD  
AIYFNDKYALDGDIDPNGYVGCMMWSVCGIHDQGWAERPVGKIRYMNYKGCQRKFAVAEFVKRYKP

>Nematostella\_vec\_XP\_032226079.1\_cry-1\_X1

MSGMDKFTTDSCLNLVAKKTSHSIHWRKGLRIHDNPALRDAVLNWGTFRVVYILDTKSVASSNIGLNLWRFL  
LQALEDLDDSLRKLNSRLFVIRGQPADVFPRFLREWGITRLTFEEDSEPFGERDSAICMLAREAGVEVASHR  
SHTLYHLQGIIDRNGGTPPLTYKKFLSVIEGIAPPDPPVPHIDPSAQELGHTPLSDNHDELYGVPTMEELGLE  
TSKLFVEVWHGGETEALKRLDRHLERKAWIASFGKPKVTSDSLMASSPGVSPYLRFGLCLSPRLFYYRLMDLYR  
KVKGPPPTSLYGLLWREFFVSTNNPNFDMESNPICLYIKWRTDKQVASDLQKWTDAQTGFPWIDAIMS  
QLKQEGWIHYLARVAIASFLTRGCLWISWEAGMKVFAEHLLDADWSSNAGNWMWWSYSAFSQQFFNPFCPVEF  
SKSLDASGDYVRKYLPLVKGFAPRYIHEPWKAPLNVQKMAKCIIGKSYSPMPVDHEKAVSKNMEEMTSVYKSV  
IQYRISVLSSEKQIEETKSQFQMPETSMH

>Nematostella\_vec\_XP\_032235657.1\_cry-2

MVNSVHWFRKGLRLHDNEPLRRAIEGSDTFRGIFFLDKAAVKNKAVSPNGWRFLIESLRDLQSLQKYNLSRL  
IIQGQPIDVFPKLIKQWNISKLTFEYDSEPFPRQDLAVKRIAEKAGVDVIVCSSHTLYDIEWMIGKNDGLPP  
ITFKQFQKLLQSGSLPSHCVKTVDENLFGDCTTPLDNEHERLFGIPSLGDLGLSFTPEESIWKGGENAALKRL  
ETVEKELLEGVSDKESYAPFPSSTKLSPYLRGLSARRVFHTASAINAKANNSSLAHGIQTSLLWRDFFV  
ASRNQALDKMHDNNMCMQFPWVEREDWLDQWRHGKTGFPWIDAIIRQLRQEGWIHHLARQSIGCFLTRGCLWI  
TWEEGFKMDFEQDLDAEWSLNACSWLSLSCSAFFNGTPSQWYCPVGIGKSLDPDGEYIRKYVPELKKMPTEYV  
FEPWLAPLEVQETAGCIVGADYPNPLVDADVARKECIIRMREVYSGLVTKLSSAPGLGNNVIHWRKDLRLHD  
NPALLDGLKNCRAFYGVYILDPNNIKAAIVSANRWNFLQLCLADLDNNLKKCGTRLYVFRGQPTTVFPQMFNE

WNITKLTFESECEPFGQRRDVAIQSLAEEFGVKVSCKPSHSLYSIEQILEMNEGKPPVLFKDFEAIVRKLGPP  
 ENPVESITRKSFMNCICPITSTHSEKFGVPSLAELGIKPADVTCGDMWVGGEREALNRLGILEDKILGSNSSK  
 NCDGSSVLFPSRTQLSPYLRFGCLSPKLYYKKLTGAYVKMQFSPPPMSLYRQLIWREFFTLASKNPNMDQVN  
 DNPLCIQISWEENKDHFLCWKQGNTGFPWIDAIMRQLQKEGWIHHLARLSVGCFLTRGCLWISWEEGLRAFEE  
 LQLDAEWSMNSGSLWLWSCSAFFHGQIPWFCPVEVGKKLDPSGSYIRKYVPELRSMPLKYLYEPWTAPDDIQR  
 AAMCVIGEDYPHPIVDHIEQRKACLQRLKTVCRHIQTTSFA  
 >Nematostella\_vec\_XP\_032236034.1\_photolyase  
 MLQLIWFRDLRVQDNSALAAAMANGPTVALFLISPGQWLAHDDAPSKVDFWLRNLKELATELGKLNVP LLVR  
 EADDWSAAPQVIAELCQQQLQISEVQVNEEYGVHESRRDQAVAEALDDLGVNFRSHLDQLFFKPGSVLTKSGSY  
 FQVYSQFRKVCYQRLHSALPTLIATPKAQAPLAIQSDAIPEHVAGFALPPAALRELWPAGEAEAARRLDDFAT  
 QQIDFYQSARDFPAQPGTSQLSAYLAAGVISPRQCLHAALQANQGEFDSGNVGVITWINELLWREFYKHILVG  
 YPRVSMHRAFAETEAVAWRDAPLELKAWEQEGRTGFPSSMQPCASCWPPAGCTTACA  
 >Nematostella\_vec\_XP\_032241878.1\_cry-1  
 MVLAMASKKTHQTVHWFRNGLRLHDNPALKEAFETSQTVRPLYVLDPDVLKNGNIGVVRWRFILESLADLDNN  
 LKKLNSRLFVVRGRPSEVFPKLFKEWKISKLTFEVDTTEPARKQDAEVLKIANKLGV DIEQRVSHTLYDLDR I  
 VNKNNGGTAPLTYKKFQSIVSSLGPPAAPLPAIDKKMVAGCNTPTTANHDKIYGVPTLEEIGQEVPEESREVL Y  
 PGGETEALERLEVYMKKEDWVCKFEKPNTAPNSIEPSTTVLSPYMTYGCLSARLFYTRLAEIYAKKKKHSQPP  
 VSLHGQLLWREFFTTAAAYKTPNFNKMVGNSLCLQVPWDQND EYLAAWAEARTGYPYIDA IMTQLRREGWVHHL  
 ARHSVACFLTRGDLWISWEEGLKVFERLLIDHDWNLNAGNWMWLSASSFFHAYFRVYSPVAFGKKTDPNGDY I  
 RKYIPKLSRYPPKYIYEPWNA PLAVQE KAGCVIGRDYPCPIVDHNKVVTRNMSRMKEARSLKYGKTD MGVDKQ  
 ASTPSKRKSKTTT DKPAKKT KITDFLADSSE  
 >Neodiprion\_lec\_XP\_015515077.1\_cry-1\_X1  
 MTDGEKAQHGGKLPFRRDGKKHTVHWFRKGLRLHDNPALREGLTGATTFR CVFVLDPWFAGSTNVGINKWRFL  
 LQCLEDLDRSLWKLNSRLFVIRGQPADVLPKLFKEWGTTDLTFEEDPEPFGRVLNQNITTLCEEMGISV VQRV  
 SHTLYKLDSII EKNGGKAPLTYHQFQNVAAAMDPPPPPEALVTSEFTTGAYTPIMVNHNDVYGVPTLEELGFE  
 TENLLPPVWIGGETEALVRLEYHLARRYWVASFGRPKMTPQSLLASQTGLSPYLRFGCLSTRLFFYQLTDLYK  
 KIKKAVPPLSLHGQLLWREFFYCAATRNP SFDRMQGNPICVQIPWDKNAEALAKWANGQTGFPWIDAIMTQLR  
 EEGWIHHLTRHAVACFLTRGDLWLSWEEGMKVFDELLLDADWSVNAGMWWMLSCSSFFQQFFHCYCPVRFRK  
 ADPNGDYIRRYVPALKTFPAKYIHEPWNA PQSIQQTAKCII GKDYPLPMVDHGKSSRINIERMKVYQQLNKY  
 RGNGLPGTRGETIEGLLNCTLATATLPQSEDEKHKHQTTSNPSLSPARHQKTICSI LSMVTLRQLDQTAEFP  
 SSEMD  
 >Neodiprion\_lec\_XP\_015522462.1\_photolyase  
 MDQFVAKRAKLSNFVNKLEEDRKNDSESVMKFKFNKKRVRLTAIDKVKENCRGIVYWMFRDSRVQDNWAF LF  
 AQKTAIKNRLPLHVCFCVLPKFLGATIRHYKFHLAALKQVELECKNLNVNFHLLRGE PNDVILKFVEKYDMGA  
 VITDFFPLRLPLSWVDDLKKKLPEDIPLCQVDAHNIVPCWEASDKLEYSARTIRNKINSKLDEYLTQFPPVIK  
 HPYTTKQKFTENDWENALKDVEIDKSVKEITWAKPGYEEGILELERFIEKRLKLYDSKRNDPTLNALS NLSPW  
 FHFGMISVQRCILEVSKYKNSHKKSVESFMEEAIVRRELSDNFCFYNEHYDSLKGAKQWAVDTLDNHRKDKRE  
 YVYTLKEFENSLTHDDLWNSAQNQLLDGKIHGFLRMYWAKKILEWTRTPEEAL EWSIYLNDKYSMDGRDP SG  
 YVGCMWSICGIHDQGWAERSIFGKIRFMNYKGCQRKFVDKAFVARWGGKVHTKKK  
 >Neoseiulus\_bar\_AVI26872.1\_DNA\_photol  
 MRRSTRRARNV KPD LGRIKYESSDSELD SKEDVLD SKDFKVEELEVDSKNLKGDLKNVKADPDSNLSFADRVA  
 KSRHDTGASVSDFDFNEGRVRFLTEAQEVAKDSTAILYWMQRDQRVFDNWSLLYAQKLAIKKKLPMIVVFCFH  
 DRCDGPNATLRTFNFMVSGLEEVQSDCRSKNINFVDVLKGLPGDVI PRYVVNQRI GAVVTD FYPIRESTAWVKA  
 VKDKLPDPVPLAEVDAHNIVPAWILHEKQVYQARQLRTKFAEHFPEFLT NFDPVMYHPSFLAKTEKVDWKYL  
 MQDKKIDRSVDDVPGVHGGGKAALAALELF IKNSLKDYEDYKNDPARDVSPYLSHYFHFHGLSSQRAFFEVQK  
 FVHNRRYEASVSGFYEEAVVRKEMSDNYCLYNDKYDCLEGAYEWA ISSLD AHRDRDKRDYLYSEEDIESATTHD  
 DLFNAATKQLKTEGRMHRYMKMYWPKKILEWTPSPEKAI AISNRLLNKYAYDGRDPDSYLAVMWAIGGLHDRP  
 WAGRRVIGKIRCMMLEGCEKKFDVAAYVD RYSGV  
 >Neospora\_can\_XP\_003881384.1\_NCLIV\_0441  
 MPHPTQTSPPHKAASPQTGLKRSASAESEHKPEKKT KKAATLPETSRMRHGEQE WIKNGCVDERRVRLVTEG  
 IREPKADGKVVICYLQRD LRVQENWALLLAQEAAARALNKPLVVIHLLVPGLAFQPTRRHLSFFIGGAREVEAE  
 LKSNIGFELPIVAKKDPKGR LDEANKKIEEVFAALQPALAVCDFNPLRLPTQIVEALARYGKGLSPLYQVD  
 THAVPCWVASNAKETSARTMRPKLQAMLKEFAVFPFKVEPHVPWTSKQLFPLDEDRVLSAVKPDPPPEPLDS  
 WKPGTKAALRLLQS FATPQNI AKYGKARNDEPLADCQSDLSPIHFGHIAVQRC LMEVSKLKDTTGDRAVHEGV  
 RAFIDEVVVRSQ LSDNFVFFNPHYDDIKGAPDWAKQDTLEKHAKDKREPQYEFTALEEGKTYDSLWNA AQLQLV  
 RDGKMHGYLRMYWAKK LLEWTKSPQEALKTAIALNDKYHLDGTD PNGVTGCMWSIGGVHDQGFKERPVFGKIR  
 YMNYPGCERKFDVKA FVRKFP GAAENAVNAAKQGLIPFSGMKKELQEIPKGRDSEQATATMMKKIEQHKAQN  
 TNAGPSSSKETKTDEPKKRQRKGSVDERAPAKSGAAKEEAEVEAE EEEAGSDE  
 >Nephila\_pili\_\_GFT22944.1

MSKSQGNSIHWFRKCLRLHDNPALVEAVKKGGHFWPIFILD PWFVKNM RVGPNRWRFLMQSLNDLDES LKQFN  
SRLFVIRGKPTVEVPDIVKKW KIELLT FESDTEPYAKARDEE IENLMKTLNVEIKKFCNTNTLYNSEQ IISYNG  
KVPLTYQAFANTADKIGLPSKPVSSIKLLKELIAEKNLKTPIENDYEIKYRVPTLKELNVDESELNPCLYPGG  
ETEALKRLELVTSKEDYICKFEKPNTSPNSLQ PSTTVLSPYMKFGCLSARTFYYKVREYVLKSKKGYTKPPVS  
LHGQLFWREFFYTVGSATPKFDQ MVGNPVCTQIPWIENDTFLQAWANARTGFPFIDA IMTQLRKEGWVHHLAR  
HAVACFLTRGDLWVSWEYGMKVFEELLLDADWSLNAGNWMWLSCSAFFHQYYRVYSPIAFGKKTDKNGDYIRK  
YIPVLKRFPPEYIYEPWKAPKKLQEQLGCVIGKDYPSPIVDHDKARTENLRMDAVYKAKKENKSNEKTSSTK  
SKKSPNKQGKRSIDEDKEVKISKFFKNK

>Nephila\_pili\_\_GFT64976.1

MSSGKQKTL LDYENPAKKQKTDEVENDS QGFIKEIKQSRLSCATSIKDFKFNNKKRVRLSDAKDIAENAQSIV  
YWMSRDQVRQDNWAFLYAQHLALKLDLPLCVCFC LVPKFLDATIRHYRFMLKGLEEVSEECESLNIHFHLLFG  
EAKKVLPDFIKENNVGGIVTDFSPLRVP AKWVSDVLT KL PDDVPLCQVDAHNIVPCWIASDKLEYGARTIRKK  
IHDKLKDFLTDFPPIIKQRETAKCKFQSIDWNKIENKLEVNMDVKEVAWAKPGTTAGMLQISEFCKKRLKDFG  
NLRNDPTKSNLSNLSPWFHFGQISVQRAILTVLKYKGKYGSSVDAFVEEGVIRRELADNFCYYNKKYDKIEGA  
YDWAKKTLKDHSKDKREYIYTKEEFENAKTHDLLWNAAQRMVREGKMHGFLRMYWAKKILEWNTNSPEEAL E I  
AIYLN DKYELDGRDPNGYVGCMWSICGIHDQGWAERAVFGKIRFMNYKGCQRKFDVNEFIRRYREK

>Nephila\_pili\_\_GFT83862.1

MTSHKQKNVHVWFRKGLRLHDQPALREGLSGATT LRCVFIIDPWFAGSSNVGINKWRFL LQCL ENLDSNLRLK  
NSRLFVIRGQPADVF PRLFKLWKTTHTLTFEKDPEPYGRIRDHNTTTMAQENGVTVISRTSHTLYRLEKIVQKN  
GNKSPLTYKQFQNILASMEPPPAPQPRITLEDMGSCYTP LSEHDHDDKYGVPTLEELGFDTENLKPPVWVGGET  
EALARLERHLERKAWVASFGRPKMTPQSLLPSQTGLSPYLRFGCLSARLFYQELTELYRKIKKVNPPSLHGQ  
ILWREFFYCAATNNPKFDH MIGNSMCVQIPWDVNSEALAKWTNGQTGF PWIDA IMTQLREEGWIIHVARHAVA  
CFLTRGDLWISWEEGMKVFEELLLDADWSVNAGSWMWLSCSSFFQ QFFHLYCPVRFGRKADPNGDYIRRYLPV  
LKNFPTKYIHEPWIAPEKVQIAAKCIIIGKDYPM PMVNHQEVSHINLERMKQVYQQLSHYRGANMYNNSYNQVN  
QRESDDGYPKSAKRRAVEYPDESGQVHKRDISLK

>Nephila\_pili\_\_GFU12876.1

MVEHLSTKMSAESTKMGSFIHWFRNDLRLYDMPSINA ALEKCTTFYPVYIFDENDIKEKQITYNKVRFILDAL  
K DINGKLQPNGGRVYVFKGNPTDIFSDLFKKWNISYLT YEVDVQPAWKVLEKSVQQICQ QHSIEI IKDVSHTL  
WNLEDILKANRGQPPVTYEVFCQVVEALGPPSRPESYVNLEKVLMPKDDSFPI DLPNNPDDLGVFMECIQ QSN  
RIWIGGETHALKHL DARLKVEEEALES GIFMPNQAKPDLLGPSMSLSAALS LGCLSVRK FYWSLQDLHERVNS  
DICVPDSLIGQLLWREYFYAMCMNNPFYATMVENPICLNI PWT TNEQHLQSWINGKTGYPFIDAAMRQMVQEG  
WLHHVARN AVACFLTRGDLWISWEEGFVFMKYLIDADY P VCAGNWMWVSSSAFENILQCPTCISPISYGRCF  
EPTGDYIRKYVPELKNMPNEYIYEPWLAPLPEQEKAGCIIGKDYQPPIIDHQEAANTNKKRMDI IKESFYTKM  
VPPHCSPSNPLETRVFMWLPENC IENLMHHRN

>Nestor\_nota\_\_KFQ46407.1

RFL LQCLELDANLRKLN SRLFVIRGQPADVF PRLFKEWNI AKLSIEYDSEPF GKERDAAIKKLASEAGVEVI  
VRISHTLYDLDKI IELNGGQ PPLTYKRFQTLISRMEPLEMPVETITPEVMEKCTTPVSDDHDEKYGVPSLEEL  
GFDTDGLPSAVWPGGETEALTRLERHLERKAWVANFERPRMNANSL LASPTGLSPYLRFGCLSCRLFYFKLTD  
LYKKVKKNSSPPLSLYGQLLWREFFYTAATNNPRFDKMEGNPICVQIPWDKNPEALAKWAEGRTGF PWIDA IM  
TQLRQEGWIIHHLARHAVACFLTRGDLWISWEEGMKVFEELLLDADWSVNAGSWMWLSCSSFFQ QFFHCYCPVG  
FGRRTDPNGDYIRRYLPVLRGFP AKYIYDPWNAPESIQKAAKCIIGVNYPKPMVNHA EASRLNIERMKQIYQQ  
LSRYRGLGLLATVP SNPNNGNGGLMGYS PGESISGCSS TGAQLGTGDGHTVVQPCALGDAHTGASGIQQQG  
YCQASSILHYAHGDNQQSHLLQAGRTALGTGISAGKRPNPEEETQSVGPKVQRQSTN

>Nestor\_nota\_\_KFQ48597.1

YFVSR IELNGHKPPLTYKRFQAIISRMELPKKPVSTVISQQMETCKVDIQENHDDVYGVPSLEELGFPTDGL  
APAVWQGETEALARLDKHLERKAWVAN YERPRMNANSL LASPTGLSPYLRFGCLSCRLFYRLWELYKKVKR  
NSTPPLSLYGQLLWREFFYTAATK FDRMEGNPICIQIPWDRNPEALAKWAEGKTGF PWIDA IMTQLRQEGWIIH  
HLARHAVACFLTRGDLWISWESGVRVFDELLLDADFSVNAGSWMWLSCSAFFQ QFFHCYCPVG FGRRTDPNGD  
YVKRYLPKLKGFPSRYIYEPWNAPESVQKAAKCIIGVDYPKPMVNHAETSRLNIERMKQIYQQLSRYRGLCLL  
ASVPSCVEDLSGPVTESASGQGCSTSTAVRLSQTDQASPKRKHEGAEELCTEELFKRAKVTGLPAPEVP GKS

>Nestor\_nota\_\_XP\_010013708.1

MVEGGRNRF LIPAGREGRHRRALPPFPEGRCFAGGCAGDIGAAPVPGKGGGRYQM MESRPRPHGTTLLSL SAR  
VVLRMRRGKGKRKA EATKVP RVSRREEETELKEEVRCTLYWMSRAQRLQDNWAFLYAQRLAL KQELPLHV  
CFCLVPKFLEATIRHYGFMLRGLQEVAEECAELNIAFHLLRGYAKDVLPAFVVEHGVGGVVTDFSP LRLPRQW  
VQDVRERLPEDVPFAQVDAHNIVPCWVASTKQEYSAWNIRGKIHAQLPEFLTEFPVVRHPYPSPCAEPIAW  
EACYSSLEVDRTVKEVEWATPGTAAGLAVLQSFIAERLKS FVFHRNDPNKAALS NLSPWFHFGQVSTQRAILE  
VQKHRHKYKESVDAFVEEAVVRRELAENFCYYNENYDSVQ GAYAWAQTT LKLHAKDKRPF LYKLQELEQGTTH  
DPLWNAAQ LQMVQEGKMHGFLRMYWAKKILEWTHSPEEALQFAIYLNDRYELDGRDPNGYVGCLWSICGIHDH  
GWTERAVFGKIRYMNYAGCKRKFDVRQFEHRYAPCALSQ

>Nestor\_nota\_\_XP\_010017836.1

MLHRTIHLFRKGLRLHDHPVLLAALESSEALYPIYILDREFLTSMHMGALRWHFLLQSLQDLRESLCQLGSS  
LLVIQGEYEAVLRDHSVQKWNITQVTLDAEVEPFYQEMEATIRRLGGELGFEVLSLGGHSLYDTRKILDLNGGT  
PPLTYKRFLHVLVSLVGDPEVPVRNLTAEDFQRCAPPDPGLAERYSVPLPGDLKIPQESFSPWKGGETEGQLQRL  
EQHLTDQGWVSSFAKPRTPSPNSLLPSTTGLSPYLSTGCVSVRTFFYRLSNIYAQAKHSLPPVSLQGQLLWRE  
FFYTASXXXXXXXXXXMAGNPICLQIRWHEDAEGHLRWKTAQTGF PWIDAIMTQLRQEGWVHHLARHAVACF  
LTRGDLWISWEEGMKVFEELLLDADYSSNAGNWMWLSASAFFHRYTRIFCPVRF GKRTDPEGQYIRKYL PVLK  
NFPSKYIYEPWTASAEQKQAGCIIGQDYFFPMVNHKEASDHNQLMKQVREEQCRTAQLTRGDTEDPMATKV  
KRDHSEEHVSKGKVARTTEQTHLPAEFTCLEPQNGKRGEAEAS

>Nestor\_nota\_\_XP\_010022925.1

VLHWAQSNADFVVPPLYCFDPRHYLRTHCYGFPQTGAHLHCYGFPHKGLHRLRFLLESVKDLRETLKRKGSTLV  
VRKGKPEDVVRDLIAQLGVSVAVVFHEEATQEELDVEKELRQVCSQHGVKIHTFWASTLYHRDDL PFRPIARL  
PDVYTHFRKAVESEAKVRPTLRMADQLQPLAPGVEEGHIPTMEDLGQKDPETDPTAFPGSGGETQALMRLQY  
YFWDTNLVASYKEMRNLVGMDYSTKFAPWLALGCISPRYIYEQIQKYEKERTANQSTYWVLFELLWRDYFRF  
VALKYGRRIFSLRGLQSKEVAWKDLQLFDCWKEGKTGVPFVDANMRELAATGFMSNRGRQNVASFLT KDGL  
DWRMGAWEFYEYLLVDYDVCSNYGNWLYSAGVGNDRDNRKFNVMVKQGLDYDSNGDYVRLWVPELQGIKGADIH  
TPWALSSAALSQAGVALGETYPQPVVTAPEWSRYINQRPVSTGKGRSPHARGRRGPAPPPVQHKDRGIDFYFS  
RRKDAR

>Neurospora\_cra\_XP\_964834.2\_photolyase

MAPSKRKASAPPQTSNVNGNPSADKKRKTITDAPPTNPNTSSDPLRAPHHPFYKDSETHGIVLRKFYPHEMSNA  
RAQAYNDNELPRPIETLSAALAEALRKSLPVRQAVVHWFKMDLRLHDNRSWLASQKAKEAGVPLICLYVL  
SPEDLEAHLRAPIRVDFMLRTLLEVLTDLGLIPLWVETVEKRKEVP TKIKELMKSWGASHLFCAMEYEVDE  
LRREAKLVKLLAEGEKGEKMAADVVDHDCVVMVMPGALQSGSGGQYAVYSPWFRAWIKHIEENPECLEIYEKPGP  
NPPGTKEKHENLFACSIPEAPEGKRLRDDEKARYHSLWPAGEHEALKRLEKFCDEAIGKYAERNIPAMQOTS  
NLSVHFASGTL SARTAIRTARDRNNTKKLNGGNEGIQRWISEVAWRDFYKHVLVHWPYVCMNKPFPKPTYSNIE  
WSYNVDHFHAWTQGRGTGFPIDAMRQVLSTGYMHNRLRMIVASFLAKDLLVDWRMGERYFMEHLIDGDFASN  
NGGWGFAASVGVDPQPYFRVFNPLLQSEKFDPDGDYIRKWVEELRDLPELKGKGKGEIHDPIYGRGSEKVKKKL  
EEKGYPRPIVEHSGARDRALDAYKRGLARDL

>Neurospora\_cra\_XP\_965722.3\_cry\_DASH

MAPSKVVIYAMRRELRLSDNPIFHHLSNPESKHGFSHLLPVYVFPAQQIDLSGFVPKGSENPHAPKSAVGGY  
ARCGPYRAKFLAESVWDLKTSLSIGSDLLVRAGPYKDVIQSLVEGLKAKECQVGAVWMTSHEGSEEKSEEKT  
VASFCAKSGIDFKLWDDKEYLIHDRDTGITHLNDLPDVFTTYRKQIEPLREKARKTLPVPEKGALPAYPDIDM  
IPSOQPPFNIPGTCEELVDVVRPVKNFLKDLPDFPEKAESSHPFRGGETSAHKRIDHLVLSGGMKSYKDSRN  
GLLGPDFSTKLSAYLAQGCVTARQIH HALVAYEDGTGT KYKGADGFGEGDNQGTETVRMELLWRDYMRLCHQK  
YGDKLFRVEGFNGKHTDYEGEDKKYGWRTANTSIALPGQEPTPEKVSEILARFNAGTTGMGLIDASQRELIHT  
GYTSNRTRQNVASFLAKHLEIDWRYGAWEYMILLVDYDVSSNWANWQYVAGVGNDRPGAARIFNPVKQAFDYD  
KDGTYVRTWVPEVAKFENLENVFAQWASKEDLKTAGLEGNIMVTD PVKPIKFNL DHKPSKVKKRPF FRKRGT  
KTRDAQGSAESPGSSDSHSGSGGSPDGSGGNI PSESNC AAGSGQAQQTHQGSGRSQSSSNHGGRRSHSHQH  
QQNYHHSHRGNDYTRGGGGGRGGRGGRGGGGGGYSASQGYGIGGGYRGGGRGGRGGGGGFRGRYAPTGGLGGH  
HHSEQQVASQFQTD A

>Nibea\_albi\_\_KAG8012485.1

MVVNSVHWFRLGLRLHDNPALQAEALNGADTVRCVYILDPWFAGAANVGINRWRFLLEALEDLDSSLKKLNSRL  
FVVRGQPTDVFPRLLKEWKVTRLTFEYDPEPYGKERDGA IKMAQEFGVETIVRNSHTLYNLDRVIEMNNNSP  
PLTFKRQFTIVSRLELPRRPLPPVTQQQMDKCRTKIADNHDQLYSIPSLLEELGMHYRCSPPSLFLGQLLWREF  
FYTAATNNPNFDRMEGNPICVQIPWDQNPEALAKWAEGRGTGF PWIDAIMTQLRQEGWIHHLARHAVACFLTRG  
DLILCLLLQVFEELLLDADWSVNAGSWMWLSCSAFFQQFFHCYCPVGFGRRTPSGDYIRRYIPILKDYPNRY  
IYEPWNAPESVQKAANCVVGVDPKPMINHAEGSRLNIERMKQVYQQLSHYRGL

>Nibea\_albi\_\_KAG8012608.1

MSPSAAAGAEDSKALVRRVLREVLVGREDPEGFFVMCLSA LGHQETRSQFVSLIQPLSTANSSLSHVLTSIYT  
EYFLRSTEDDELELAMALSLEMKDHCMTSPSQESRCRQTGVDRKNIGLPQGEPCVKVSPPQTARETELEKS  
THAYKNTETPGTSQTVCVSTLSISKQDKLEQGYQKMDERDLNQSEKPKRSKNRRQRRKGPCQQIIVGLPCSPS  
ALPPVLLWFRDLRLCDNPALICSLEFGAPVIPVFIWSP EEEEGPGITVAMGGACKYWLHQALSCFCSSLERI  
GSHLVFLKANRQGNKFGSSSLTKELIKETGARTVLANALYEPWLKERDDAVVSSLQKDGEVFRMFHSYCLRD  
PYSVSTEGVGLRGIGSVSHFMSCCRQNPGSALGVPLDPPVSLPTPVHWPQGVPLDTLGLARMPCRKDGTTIDW  
AANIRKSWDFSEDGARARLEAFLHDGVYRYDKESGRADAPNTSCLSPYIHFQQLSPRWLLWDAGARCRPPKF  
QRKLAWRDLAYWQLTLFPDLPWDSIRPPYKALRWSTDRGHLKAWQQGTGYPLVDAAMRQLWLTGWMNNYMRH  
VVASFLIAYLYLPWQEGYRWFQDTLVDADVAIDAMMWQNGGMCGLDHWNFVMHPVDAAMTCDPYGSYVRKWC  
ELASLPDELIHKPWKCPASMLRRAGVVFQGTYPERIVADLEERRSQSLQDVALVRKEFRQYVDKRSGCDLVPL  
PPRLVSEALGLSHRDGDVVTAGKQFLLPVITRMEFKHQLEDPEADAASNPYNCCSERICEPQEG

>Nibea\_albi\_\_KAG8013990.1

MSDKKRKPASSSAAAAAGSSAKQPKLTPAKEKAGGWLQDLMKQQRTEKKGMKVNKKRLRVLSDTGKIKQGSE  
GVLYWMSRDHRVQDNWALIHAQQLAWEENLPLHVCVCLFVPKSELSTLRHYSFMLKGLEEVAKCEKALDIQFH  
LLHGAAGDVLPGFVSDRSLGAVVTDFSPLRERLQWLEDVKKKLPKDVPIIQVDAHNIVPCWEASPKLEYAART  
IRGKITKLLPEFLTDFPLVEKHPYTATRTAKPVDWEKNQASLDVDRTVGEPEWAKPGTKAGVEMLESFIDVRL  
KLFETQRNDPNAAALSQSPWIRFGHLSAQVALQVQSRGKNSGQSVSSFIEELVVRRELTDFNFCFYNNKYDS  
VEGAYEWAQKTLKDHAKDKRPYIYTREQLEKAKTHDKLWNAAQYQMVTEGKMHGFIRMYWAKKILEWTSSPEE  
ALAIALYLNDRYSLDGQDPNGFVGCMWSICGIHDQGWAERPVFVGKIRYMNYKGCLRKFDFVARFEQKYCPKNL  
>Nitrosopumilus\_sp.\_RMW33708.1\_photolyase  
MAQYQKSLFIFRRDLRLADNTGLIAASQSSSEVIPIFIVDSAIMNSKERFSEFRLQFLKDCLLDLDSQLKEKK  
SYLHIFVGNSEKIIISKIISKASKIDAIFVNTDYTPFSKNRDKRIEKICKESKVDIFISADDILLHNVELLKTGNG  
EPYKVFSAFYSKAREFYQYRKPQNHKFENLSKTKISSETSLEKIPEFNIKNNSKIMKGGKAGLELLKLNKLNK  
NYNKERNIPSINGTSHLSAHNKFGTCSIREIHQECIKNLGQSHTIISELHWRDFFTYIMYHSPYSYSKEFNKR  
FQKIPWSKNQKNFSKWCQGMGTGFPIVDAGMRELNNSGFMHNRVIRMIVASFLTDLHIDWRLGEKYFATKLIDY  
DACVNIGNWQWSASTGCDAQPWFRIFNPNWLQQRKFDPECTYIKKWVPELREMDAKVIHDLWKKHPESSSYVKP  
ILDHKTESQNAKEIFFSQ  
>Nitrospira\_len\_WP\_121988866.1\_DNA\_photol  
MRGLVWFRRDLRLHDQPALTAACQECDEVLPFVFDEPLLQSREFGSACVNFMLGCLHELSTSLAGRGLVLQW  
RRGEPVEAVVQAARESKAEVVYWNRDYEPAAIERDRRVQLALAEQGIRTQTFTDHFVFETEEIRGATGDPLQR  
YSAYRARWWAKWQAAKPSPLASPKPKASTVVPSPRSAPRPFSPVELGYDRVVPWIDPGEREARRLQEF LGNA  
IHTYGDGRNRPGVDGSSRLSPHFRFGTSLSVRTAVHEALAAALAQGGRVSRADVLIWIDELVWREFFQQVLAAFP  
WVAVAGPFRAVAVPPVREPGLERDLFQAWCQGRGTGFPIVDAGMRQLHQTGMHNRVIRMIVASFLIKDLRIDWQ  
SGERYFMQQLLDADVGANNGNWQWCAGTGTDAMPGYRIFNPALQSKKFDREGLYIRAYVPELAKVTGKWIHEP  
HLMTPDEQDRAGCRIGVDYPAPLVDHAQARREYLDLGKQQVMR  
>Nosema\_bom\_EOB11318.1\_photolyase  
MDKRLKILNGNPKTGSTLYVMRRDQRIYENYAIEYGYSLSYEKKSEFIIGIDFNTIIVNEFQKMIMFEGLEEL  
SKDCLKFNLPFSFDNLKFLIDKMKIKNIILDYSPLRGS�KYDEDVTKICKDLGIYCVQVDAHNVPVPHNLEET  
YKRTGKSVKNDLFKHFFDFLKEFKSLEKHKFNKSKGDFKLPSFTKHDYFIGGYKAGMVQVQYFFQNKFKRYAD  
KRNSPDDNVLSDLSPYLHFGQISSQKVLLDAYDLFYNKDDKNLESFVNEIFVWKETSEHFCFHEKNYDNLEGA  
LPWAKESLLKHADDKREKIYTKGILEEGKTKSELWNAAQTELFNFKIHGYVRMFQWAKQMLKWTKSPEEALSL  
AIWLNKYSLDGNDPNGYTGIMWSICGTMQGWKERDVGKIRAMNEIKTKKYTKMWTNKKEKEAYLKQRKVK  
RDKK  
>Nothobranchius\_furz\_XP\_015808759.1  
MAHICIHWRKGLRLHDNPALVAALRDSKELYPVFILDPLYLHNSHVGINRWRFLIGALEDLDRSLRRLNSRLF  
VLKGGPEDVFPKLFTEKWKVTKLTYEYDTEPYSLRRDKAVALAREHRVSVIYQISHTLYDIDRIIEENGKPP  
LTYNRLRELARKLGPPKKPIPAPTLEDMDKDVTPCSEKDQKKYGIPTLEELSDDTSLGEELFPGGEQEALRR  
LDEHMKRTGWVCSFEKPLTSPNSLSPSTTVLSPYVTFGCLSARTFWWRLADVQGGKHSDPPVSLHGQLLWRE  
FFYTASVGIPNFKMEGNPVCTQVDWDTNPEYLAAWREARTGFPFIDAIMTQLRTEGWMHHLARHAVACFLTR  
GDLWISWEEGQKVFEALLLDGDWALNAGNWQWLSASTFFHQFFRVYSPVAFGKKTDKNGDYIKKYLPLVKKFP  
AEYIYEPWKAPRCVQQAAGCIVGKDYPRPLVKHEEVSKRNIQRMKRAYAQRSSNPESPAPAKQGVKRKNPSVL  
EMLQKKIRKE  
>Nothobranchius\_furz\_XP\_015810621.1  
MSASRTIVCLLRNDRVHDNELFHWQAQKNAEHIVPLYCFDPRHYVGTHNFNFPKTGPFRLRFLLESIRDLRNT  
LLSKGSNLVVRGKPEEVVADLIKQIGSVSSVAFHEEVTSEELGVERKLKEVCAQLKVKVHTFWGSTLYHRDD  
LPFHHMSRLPDVYTQFRKEVESQSRVRPVFPTPERLNPLPPGVEGGDVPTAEDLQQTEPLTDPRSAFPCSGGE  
SHALARLKHYFWDTDKVASYKETRNGLIGVDFSTKLSPLWANGCISPRYIYHQIKRYEEERTANQSTYWVIFE  
LLWRDYFRFVGKYGKNI FLIKGLQDKPVWKKDTKLFDAWKEGRTGVPPVDANMRELALTGFMSNRGRQNV  
SFLTDLGLDWRLGAEWFEYLLIDHDVCSNYGNWLYSAGIGNDPRENKFNMIKQALDYDSNGDYVRQWVPEL  
NAVRGADVHTPNWNLSSAALSNAHVS LGETYPTPIVIAPEWSRHFNKKPSNSGSPRGRGPSHTPKQHRDRGI  
DFYFSRSKNL  
>Nothobranchius\_furz\_XP\_015820104.1  
MPSVADDLALVRHMLREVLVGREDEGYFAMCLSILGHQETLSQFASIIKPLSTANIHLHSILTSIYQEYFSK  
TEDDEMELALALSLLQMKDQQMATSNNEPTPLQFGVTDPCSFHQPDVVSNHQGNCLEVTPGREANSYSVLT  
GTEEGQPHINQKTGQHKNTHNSDAKQTPETGQSPQISGSSASFVPGMSHEGDHITEDLNTSDPKPKRSRNR  
QRRKGTHQQLVGLPCSPSTPPPVLWFRDLRLCDNPALIRSLELGAPVIPVFIWSPKEEGPGVTVMGGAS  
KYWLHQALSCLCASLEKIGSHLIFLRASGEGNEVGSSLHV LKQLVKTGAQTVMANALFEPWLKERDDAAVAA  
LQKGGVVCRLQSYCLRDYVSVSTEGVGLRGIGSVSHFMSCCRQNPSPIGVPLDPPVSLPTPAHWPQGVPLD  
ALGLARMPRRKDGTVDWAANIRKSWDFSENGAHARLDSFLNDGVYRYEQESGRADASNTSGLSPYLHFGQLS  
PRWLLWDAKGACCRSPKFORKLAWRDMAYQTLTLPDLPEWESLRPPYKALRWSTDRGHLKAWQQGKTGYPLVD  
AAMRQLWQTGWMNNYMRHVVASFLIAYLHLPWQEGYRWFQDTLVADVAIDAMMWQNGGMCGLDHWNVFMHPI  
DAAMTCDPNGSYVRKWCPELSDLPDELIHKPWKCPASMLRRAGIVFGQTYAERVITDLEERRTRSLQDVALVR

REFGQYVDKRSRGCDLLPLPPRLVSEALGRSHSDEAVVRGGRQFLLPLITRMEFKYQQEEPEADAASNPNATL  
KGYVSRRRDETVAFLNERDFKTSVMYESAQRQGRLERDYRRIEGLPSSSPRGRARRTPAKDRFSIVPGGAV  
TLLK

>Nothobranchius\_furz\_\_XP\_015820664.1

MVVNSVHWFRKGLRLHDNPALQEALNGADTVRCVYILDPWFAGAANVGINRWRFLLEALEDLDSSSLKKLNSRL  
FVVRGQPTDVFPRLFKEWNVTRLTLEYDPEPYGKERDGAIIKMAQEFQVETAVRNSHTLYNLDRIIEMNNNSP  
PLTFKRQFQTIIVSRLELPRRPLAPITQQQMNRCPQTQIPDNHDQLYSIPSLEELGFRTEGLPPAVWRGGESEALE  
RLSRHLDKKVWVASTRVKTCSLYASPTGLSPYLRFGCLSCRVLYYNLREIYMKLCKRSTPPLSLYGQLLWREF  
FYTAATNNPNFDRMEGNPICVQIPWDQNPEALAKWAEGRTGFPWIDAIMTQLRQEGWIHHRARHAVACFLTRG  
DLWISWESGMKVFEELLLDADWSVNAGSWMWLSCSAFFQQFFHCYCPVGFGRRTDPSGDYIRRYIPIIKDYPN  
RYIYEPWNAPESLQKAANCVVGVHYPKPMINHAEGSRLNIERMKQVYQQLSHYRGLSLLASVPTIQEEAEPPM  
TDESQTSSGPDSPTRILADVEAAGCSTAPDSSTSVSHPHHKAQSHIRPGLDPCTSSARPTSPITNMSHIPTS  
RTKPASSLSSSCPSSSLSLCPGVLQNTSVGTRRKGAIRKVRQSQRQGRPCCPSTAREDEEGEEEEEERMQEEEE  
ERMEDEETAAMTGAL

>Nothobranchius\_furz\_\_XP\_015822838.1

MAPNSIHWFRKGLRLHDNPALREAVQGAATVRCVYFLDPWFAGSSNVGVNRWRFLQCLELDANLRKVNSRL  
FVIRGQPANVFPRLFKWKISRLTFEYDSEFPFGKERDAAIKKLAMEAGVEVIVKISHTLYDLDKIIELNGGQP  
PLTYKRQFQTLISRLDPPEMPVETLSDTLMGSGITPISEDHGEKYGVPSLEELGFDTEGLPSAVWPGGETEALT  
RIERHLERKAWVANFERPRMNANSLASPTGLSPYLRFGCLSCRLFYFKLTDLYRKVKKNSSPPLSLYGQLLW  
REFFYTAATNNPRFDKMEGNPICVRIPWDKNPEALAKWAEAKTGFPWIDAIMTQLRQEGWIHHLARHAVACFL  
SRGDLWISWEEGMKVFEELLLDADWSVNAGSWMWLSCSSFFQQFFHCYCPVGFGRRTDPNGDFIRRYLPILRG  
FPAKFIYDPWNAPESVQTAAKCIIGVHYPKPMVHHAESRLNIERMKQIYQQLSRYRGLGLLASVPSTNVTGN  
GGMAYSPAEQHPGTSSSSSSSHCYHSVPDSSQSITSSRLCHEFAVPQHPGLLHTRGSSITGKRERESEQNGSG  
EEDQASCSVNKMQRQSAETS

>Nothobranchius\_furz\_\_XP\_015829836.1

MHLKLQLNRKRLACFRTSFLFTFLAARSSFEATMSDRKRRAASSSSGKRPKLPSAPDREEGKEPAGWLLRAVQ  
QQREDAKDQSFNRKRLRFISETTEKVTQGSEGILYWMRLDQRVQDNWALIHAQQALAAQENLPLHVCFCFLVVPKS  
PLSTLRHYSFLLKGLEEVAKECKQLNIQFHLHGAAGDLLPAFVSDRDFGAVVTDFSPLREHLQLLKDVQKKL  
KKDVPLMQVDAHNVVPCWEASPKLEYAARTIRGKITSRLPEFLTDFPAVEKHPHTAVRTAKPVDWDEALASLD  
VDRSVEEPQWAKPGTAAGMAMLESFIDVRLKLFNTHRNDPNAAALSQSPWIRFGHLSAQORVALQVRRCGKNA  
TESVASFIEELVVRRELTDFNFCFYNNYDSVKGAYEWAQKTLNDHAKDKREYLYTREQLEQAQTHDKLWNAQ  
YQMVRDGMHGFMRMYWAKKILEWTSSPEEALSIALYLNDRYELDGQDPNGFVGCMMWSICGIHDQGWSERPVF  
GKIRYMNKGLRKFDDVAQFERKFCPKK

>Notodromas\_mon\_CAD7273426.1\_unnamed\_pr

MSRGSSPPAKKLKLGESRPGGFLIQEISESRKVGKSVLDFKFNKGRVKILTKATEVPEWAKGIVYWMSRDQR  
VQDNWAMLFAQKLALKHKLPLHVCFCFLVPKFLDATIRHFRFMLKGLQEVEKECRELEIPFHLLPGQANEVLVN  
FVKSNKIGVVVTDFAPLRVPLKWVDDVKNVPRDVSVVRVDAHNVVPVWIASEKQEYAARTIRPKIHRNLDSY  
LTEFPPIQKHPYPVPVKPEAIDWENVENNLEVDRSVEDVEWAAPGTQAGLKQLESFILKRLKYADKRNPNV  
KALSNLSPWFHFGQISVQRAVLEVKRHGKSFPAKEGFEVVEAVRRELADNFCFYNQKYDRIAGAYDWARLTL  
EAHRKDVREFLYTKEEFDDAKTHDDLWNAAQIQLKQEGKMHGFLRMWAKKILEWTESPEQALEFAIYLNDRY  
NLDGRDPNGYVGCMMWSICGIHDQGWAERKVFGKIRYMNKYGCKGKFDVAAFVAKYRARAYPYKKK

>Notodromas\_mon\_CAD7273494.1\_unnamed\_pr

MENVSAHWFRHGLRLHDNPALLEGFSRASKVFAFFTDFGESAGTGWIGYNRMKFICESLADLDRSLRSRGGR  
WIFQKDVTTLLSAFKSRFSLTNLSFERDSEAVWQNRDCAVRQHCASSGIDLVEKVSITLWDPDQILDANGGLP  
PLTMVEFLSLIAKKRGDPERPVDSENVDSYFFDLETAFAANDKGMDELCLFPGIPTPEDFGILPEPGQEIRLYI  
GGETRADELLIKRLQASSVVTGMIDFPDSGIFFTVEKNAMQMQITQPNHAFPNLIAPPMSLSPYLRYGCLSI  
RKIFYWLLLDMMRVGLSTTTCTSAALGLVMQLMWREYFYCMSTRNPGFGRIEGNQICLPIPWSRDESSLNAWKLG  
VTGFPFIDAAMRQVRREGWIHHVARNACAQFLTRGGLWISWEEGLRHFLFYLLDGDWSVCSGNWLWLSSSSFE  
KMLDCSECFSPSMFGRRLDPAGDYVRKYVPELSGMPTEYLHEPWLAPLEVQKKAGCILGEHYPKPMIDFVKRS  
KRNARRMANFRRLGCAIPRHCAPSSEEEAREFMWSTAATSVFGHHSHSEVCRGTEVME

>Notodromas\_mon\_CAD7283181.1\_unnamed\_pr

KYQIGLKIASRIIDKNGGQAPMTYRQFHSVLSQMDPPHPAGTQVTEYLDHRHCPKSVSPIDEDHDDKYGIPTL  
EELGFIYTSGLKQITLWPGGETEALTRLERHLERRAWVASFGRPRMTQPSLMANQTGLNPYLRFGCLSPKTFYHQ  
MSELYRKIKKCPPLSLHGQLLWREFFYCAATNNPKFDRMEGNPICVQIPWVKNPPALAKWANGQTGYPWIDA  
IMTQLREEGWIHQRLARHAVACFLTRGDLWLSWEEGMKVFEELLLDADWSVNAGSWMWLSCSSFFQQFFHSYCP  
VKFGRKVDPNGDYIRRYLPVLKSYPTKYIHEPWKAPETVQKSARCIVGKDYPLMLNHSEVSKINVERIRQVY  
RRLSNFNKNGPGRVPKAIISCPSTESCRSNGGHDDDAAVIASASLTTPATIEV

>Numida\_mele\_\_XP\_021232797.1

MQLLTSGTWRLGGRMRHRTIHLFRKGLRLHDNPALLAALQSSEVVYPVYILDRAFMSTAMHIGALRWHFLLQS  
LEDLRNSLCQLGSCLLVIQGDYASVVRDHVQKWNITQVTLDAEMEFPYKEMEANIRALGEELGFEVLSLVGHS

LYNTQRVLELNGGAPPLTYKRFLRLISVLGDPEVPVRNLTAEDFQRCSPPELSLAERYGVPLPTDLKIPPEI  
SPWRGGESEGLQRLERHLADQGWVARFTKPKTVPNSSLPSTTGLSPYFSMGCLSVRSFFYRLSNIYAQAKHHS  
LPPVSLQGQLLWREFFYTVASATPNFTKMAGNPICLQIRWYEDAERLHKWKTAQTGF PWIDAIMTQLRQEGWI  
HHLARHAAACFLTRGDLWISWEEGMKVFEELLLDADYSINAGNMMWLSASAFFHHYTRIFCPVRFGRRTDPEG  
QYIRKYLPIKFNFSKYIYEPWMASEEEQKQAGCIIGRDYPPFPMVDHKAASDHNQLMKQVREEQYRTAQLTR  
DDADDPMEMKLKRRDRSEENLTKTKAARMTEQT

>Numida\_mele\_\_XP\_021242261.1

MGVNAVHWFRKGLRLHDNPALRECIRGADTVRCVYILDPWFAGSSNVGINRWRFLQLCLEDLDANLRKLNSRL  
FVIRGQPADVFPRLFKEWSIAKLSIEYDSEPFGERDAAIKKLASEAGVEVIVRISHTLYDLDKIELNGGQP  
PLTYKRQFQTLISRMEPLEMPVETITPEVMQKCTTPVSDDHDEKYGVPSLEELGFDTDGLPSAVWPGGETEALT  
RLERHLERKAWVANFERPRMNANSLASPTGLSPYLRFGCLSCRLFYFKLTDLYKKVKNSSPPLSLYGQLLW  
REFFYTAATNNPRFDKMEGNPICVQIPWDKNPEALAKWAEGRGTFPWIDAIMTQLRQEGWIHHLARHAVACFL  
TRGDLWISWEEGMKVFEELLLDADWSVNAGSMMWLSCSSFFQOFFHCYCPVGFGRRTDPNGDYIRRYLPVLRG  
FPAKYIYDPWNAPDSVQKAAKCVIGVNYPKPMVNHAEEASRLNIERMKQIYQQLSRYRGLGLLATVPSNPNGNG  
NGGLMSFSPGENISGCSTAGGAQLGTGDGQTAGVQTCALGDTHTGGSGVQQQGYCQASSILRYAHGDNQQSHL  
MQPGRTSLATGVSTGKRPNPEEETQSVGPKVQRQSTN

>Numida\_mele\_\_XP\_021250745.1

MGTTPGSHLPCGRAVSGGECWVCAQPAAAGCSGARFPHARGWGRSPRRARGRYQRGKRAAQRSPGPRGAAS  
SCPRGGERVGAARGGHAHVTAHTPSPSPGPAPCCVNARSAAATWGAAVRRLCVGLRMPRGSGKGRKERDAGT  
EEEEAAAAAEAVGTLEAAVREARRRAAPSVRDFRYNKQARLVSRSSELKEGAECILYWMFRDQRVQDNWAFLY  
AQRLALKQELPLRVCFCLVPSFLDATIRHYGFMLRGLQEVAKECAELDIPFHLLLGSPKDVLPGFVVKHSGVG  
LVTDFCPLRVPRQWVEEVRDRLPEDVPFAQVDAHNIIVPCWVTSSKQEYSARTIRAKIHSQLQEFLTEFPVVR  
HPHPPNPPEPIAWDACYSSLQVDRTVTEVTWATPGTAAGLAMLSQSFIAERLKSFGSQRNDPNKAALSNLSPW  
FHFQGVSTQRAILEVQKHRHTYKESVDAFVEEAVVRRELAENFCYNNENYDSVRGAYDWAQSTLKLHAKDKRP  
FLYELPQLEQATTHDPLWNAQLQMVREGKMHGFLRMYWAKKILEWTRSPPEALQFAIYLNDRYELDGMDPNG  
YVGCLWSICGIHDQGWKERDVF GKIRYMNYAGCKRKFDVDQFERRYAHCK

>Numida\_mele\_\_XP\_021257408.1

MAAAPSPPRGFCRSVHWFRRGLRLHDNPALQAALRGAASLRICIYILDPWFAASSAVGINRWRFLQLSLEDLDN  
SLRKLNSRLFVVRGQPTDVFPRLFKEWGVTRLTFEYDSEPFGERDAAIVKLAKAEAGVEVVIENSHTLYDLDR  
IELNGNKPPLTYKRQFQAIISRMEPKPKPVSSIISQOMETCKVDIQENHDDVYGVPSLEELGFPTDGLAPAVW  
QGGETEALARLDKHLERKAWVANERPRMNANSLASPTGLSPYLRFGCLSCRLFYRLWELYYKKVKNSTPP  
LSLYGQLLWREFFYTAATNNPKFDRMEGNPICIQIPWDKNPEALAKWAEGKTGF PWIDAIMTQLRQEGWIHHL  
ARHAVACFLTRGDLWISWESGVRVFDLLEDADFSVNAGSMMWLSCSAFFQOFFHCYCPVGFGRRTDPSGDYV  
KRYLPKLKGFPSRYIYEPWNAPEVQKAAKCIIGVDYPKPMVNHAETSRLNIERMKQIYQQLSRYRGLCLLAS  
VPSCVEDLSGPVTD SAPGQGSSTSTAIRPPQSDQASPKRKHEGAELCTEELYKRAKVTGLPALEIPGKSS

>Nyctibius\_gran\_\_NXQ79840.1

DNWAFLYAQRLALKQELPLHVCFLVPKFLDATIRHYGFMLRGLQEVAEECAELNIPFHLLLGAKDVLPAFV  
VEHGVGGLVTDFCPLRLPRQWVEDVREQLPEDVPFAQVDAHNIIVPCWVASPKQEYSARTIRGKIHSQLPEFLT  
EFPFVICHYPYPPSCLPEPIAWEACYSSLQVDRTVKEVEWATPGTAAGLAVLQSFIAERLKSFGSHRNDPNKAA  
LSNLSPWFHFQGVSTQRAILEVQKHRGKYKESVDVFVEEAVVRRELAENFCYNNENYDSVQAYDWAQTTLKL  
HAKDKRPFLYELQELEQGTTHDPLWNAQLQMVLEGKMHGFLRMYWAKKILEWTRSPPEALRFAIYLNDRYEL  
DGRDPNGYVGKLQDGGMGWGCLWSICGIHDQGAERAVFGKIRYMNYAGCKRKFDVQGFERRYAP

>Nyctibius\_gran\_\_NXQ81244.1

CIYILDPWFAASSAVGINRWRFLQLSLEDLDNSLRKLGSRLFVVRGQPTDVFPRLFKEWGVTRLTFEYDSEPF  
GERDAAI IKLAKAEAGVEVLIENSHTLYDLDR IELNGHKPPLTYKRQFQAIISRMEPKPKPVSTVMSQQMEAC  
KVDIQENHDDVYGVPSLEELGFPTDGLAPAVWQGGETEALARLDKHLERKAWVANERPRMNANSLASPTGL  
SPYLRFGCLSCRLFYRLWELYYKKVKNSTPPLSLYGQLLWREFFYTAATNNPKFDRMEGNPICIQIPWDRNP  
EALAKWAEGKTGF PWIDAIMTQLRQEGWIHHLARHAVACFLTRGDLWISWESGVRVFDLLEDADFSVNAGSW  
MWLSCSAFFQOFFHCYCPVGFGRRTDPSGDYVKRYLPKLKGFPSRYIYEPWNAPEVQKAAKCIIGVDYPKPM  
VNHAETSRLNIERMKQIYQQLSRYRGLCLLASVPSCVEDLSGPVTD SAPGQGCSTSTAMRLSQADQASPKRKH  
EGAEELCTEELYKRAKVTGLPTPEIPGKS

>Nyctibius\_gran\_\_NXQ83460.1

MPHRTIHLFWKGLRLHDNP TLAALESSEAIYPVYILDRRFMTSVMHIGALRWHFLLQSLEDLQKNLRQLGSC  
LLVIQGEYESVLRDHVQKWNITQVTLDEVEPFYKEMEANIRRLGEELGFEVLSLVGHTLYDTRILDLNGGT  
PPLTYKRFLHILSLLDGPEVPVRNLTAGDFQRCQPPDGLAEYRVPLPVDLGI PLESLSWRGGETEGLQRL  
EQHLTDQGWVASFTKPR TIPNSLLPSTTGLSPYFSMGCLSVRTFFYRLSNIYAQAKHHS LPPVSLQGQLLWRE  
FFYTVASATPNFTKMAGNPICLQIRWYEDAERLHKWKTAQTGF PWIDAIMTQLRQEGWIHHLARHAVACFLTR  
GDLWISWEEGMKV

>Nyctibius\_gran\_\_NXQ85569.1

MQHSSSIHWFRKGLRLHDNPALLAAATNCHRLHPLFILDPSRSSRASTNAWRFLLDALRDLDGSLQEMGSRLFVV  
RGCPEEVFPRLFHAWETTRLTFEVDTEPSAHRDATVAELAARHGVEVIQEVSHTLTYDTRKVLALNDGKAPLT  
YKHLQSLLASLGPPEKPAPALTQEHLQSCHTPCQASHDTDYGVPTLEELGQDPAEVGPHLYPGGETAALARLN  
ALMKRTAWVRGFKKPETEPNSLSPSTTVLSPYLKFGCLSVRTFWWRLEDEVYQAQREHSRPPVSLHGQLLWREF  
FYTAGTSIPNFDRMVGPNVCLQVDWDDNPQHLHAWREGRTGYPFIDAIMTQLRTEGWIHHLARHAVACFLTRG  
DLWVSWEEGLKVFEELLLDADWSLNAGNWLWLSGSAFFHRYFHVYSPVAFGKKTDRDGAYIRKYLPLVKDFPA  
KYIYEPWKAPQAVQEQAGCLVGTHYPRPIVEHRAARERNLGRMK  
>Nyctibius\_gran\_\_NXQ88889.1  
KVDYDVCSNYGNWLYSAGIGNDPRDNRKFNMIKQGLDYGNGDYVRLWLPELQGIKGADIHTPWALNSAALSQ  
AGVTLGETYPQPVVTAPEWSRHINQRPQGRSPHPRGRRGPAHTPAQHKGDRGIDFYFSRKKDV  
>Nyctibius\_gran\_\_NXQ92069.1  
NPALRECIQGADTVRCVYILDPWFAGSSNVGINRWRFLLQCLEDLDANLRKLNLSRLFVIRGQPADVFPRLFKE  
WNIAKLSIEYDSEPFGERDAAIKKLASEAGVEVIVRISHTLYDLDKIIELNGGQPPLTYKRFQTLISRMEPL  
EMPVETITPEVMEKCATPVSDDHDEKYGVPSLEELGFDTDGLPSAVWPGGETEALTRLERHLERKAWVANFER  
PRMNANSLLASPTGLSPYLRFGCLSCRLFYFKLTDLYKKVKKNSSPPLSLYGQLLWREFFYTAATNNPRFDKM  
EGNPICVQIPWDKNPEALAKWAEGRGTFPWIDAIMTQLRQEGWIHHLARHAVACFLTRGDLWISWEEGMKVFE  
ELLLDADWSVNAGSWMWLSCSSFFQQFFHCYCPVGFGRRTPNGDYIRRYLPVLRGFPKYIYDPWNAPESVQ  
KAAKCVIGVNYPKPMVNHAEEASRLNIERMKQIYQQLSRYRGLGLLATVPSNPNGNGGGLMGYSPGESISGCG  
STGGAQLGTGDGHAVVQPCALGDSHTGASGIQQQGYCQASSILHYAHGDNQQSHLLQAGRTAFGTGISAGKRP  
NPEEETESVRPKVQRQSTS  
>Nymphon\_str\_KAG1657147.1\_Deoxyribod  
MIGIVWFRQDLRLSDNDSFFSSLPGVRSSNPLWLHNSLENLSSDLRAGSSNLIIRKGGSLAVLSELVNETQAT  
HLYWNRCEYEPKISKRAVIKATLRDQIEIRSFKNLLIEPWQVLKADGSPYRVFTPYWKALTQKLILSVPLAT  
PDNFKPKYKKWPRS AKLSQLNFLPQHPEPSWDKKLMSNWKVGEAAAHDLHQFLEDGVQNYKEQRDFPAVGGTS  
LLSPHLHFGEISPTQVYHYSKNHKAENPHHDHGVGHILRQIVWREFAYSLMYHFPQTITDPLFEKYKGFEWRE  
SKEELKRWQQGKTGFPIIDAGMRELWQTGIMHNRVRMIVASFCKNLLIHWHEGEAWFRDRLVDADIANTMG  
WQWVAGSGADAAPYYRIFNPILQSKKFDKAEYIRRWVPELSHLDNKEIHQPSAAQAKKV  
>Oceanites\_ocea\_\_NXF45076.1  
CIYILDPWFAASSAVGINRWRFLLQSLEDLDNSLRKLNLSRLFVVRGQPTDVFPRLFKEWGVTRLTFEYDSEPF  
GKERDAAI IKLAKAEAGVEVVIENSHTLYDLDRIIELNGHKPPLTYKRFQAIISRMELPKKPVSTVMSQQMETC  
KVDIQENHDDVYGVPSLEELGFPTDGLAPAVWQGGETEALARLDKHLERKAWVANAYERPRMNANSLLASPTGL  
SPYLRFGCLSCRLFYRLWELYYKKVKNSTPPLSLYGQLLWREFFYTAATNNPKFDRMEGNPICIQIPWDRNP  
EALAKWAEKGTGFPWIDAIMTQLRQEGWIHHLARHAVACFLTRGDLWISWESGVRVFDLELLDADFSVNAGSW  
MWLSCSAFFQQFFHCYCPVGFGRRTPSGDYVKRYLPKLKGFPSRYIYEPWNAPESVQKAAKCIIGVDYPKPM  
VNHAETSRLNIERMKQIYQQLSRYRGLCLLASVPSCVEDLSGPVADSASGQCSTSTGMRLSQADQASPKRKH  
EGAEELCTEELYKRAKVTCLPAPEIPGKSL  
>Oceanites\_ocea\_\_NXF45918.1  
MPHHTIHLFRKGLRLHDNP TLLAALESSEVVYPVYILDRKFMTSMHIGALRWHFLLQSLEDLQKNLCQLGSC  
LLVIQGEYESVLRDHIQKWNITQVTLDAETEPFYKEMEANIRRLGEELGFEVLSLVGHSLYDTRKILDLNGGT  
PPLTYKRFLHILSLLDGPEVPVRNLTAEDFQRCCKPPDLGLAECYRVPLPVDLKI PPESLSPWRGGETEGLQRL  
EQHLTDQGWVTSFAKPRITPNSLLPSTTGLSPYFSLGCLSVRTFFYRLSNIYAQAKHSLPPVSLQGQLLWRE  
FFYTVASATPNFTKMAGNPICLQISWYEDAEGHLKWKTAQTGFPWIDAIMTQLRQEGWIHHLARHAVACFLTR  
GDLWISWEEGMKVFEELLLDADYSINAGNWMWLSASAFFHQYTRIFCPVRFGRRTPDEGQYIRKYLPI LKNFP  
SKYIYEPWTASEEQKQAGCIIGQDYPFPMVNHKEASDHNQLQMKQVREEQYRTAQLTRDDTDPMEMKVKRD  
HSEENISKGKVARMTD  
>Oceanites\_ocea\_\_NXF51252.1  
KVDYDVCSNYGNWLYSAGIGNDPRDNRKFNMIKQGLDYGNGDYVRLWVPELQSIKGADVHTPWALNSAALSQ  
AGVTLGETYPQPVVTAPEWSRHINQRPQGRSPHPRGRRGPARTPMQHKDRGIDFYFSRKKDV  
>Oceanites\_ocea\_\_NXF53842.1  
MQHSSSIHWFRKGLRLHDNPALLAAAADCCCLHPLFILDPSGRAGATARRFLLDALQDLDGSLREVGSRLFVV  
RGCPEEVFPRLFHAWGTTRLTFEVDTEPPARQORDAAVAELAARHGVEVIQEVSHTLTYDTRKVLALNDGKAPLT  
YKRLQSLLAFLGPEKPAPVLTREHLQGCHTPRQVSHDADYRVPTLEELGEDPTKVGPGLYPGGERAALARLD  
TLMERTAWVRCGFKKPETEPSLSPSTTVLSPYLKFGCLSVRTFWWRLEDEIYQGREHSRPPVSLHGQLLWREFF  
YTAGASIPNFDRMVGPNVCLQVDWDDNPQHLCAWREGQTGYPFIDAIMTQLRIEGWIHHLARHAVACFLTRGD  
LWVSWEEGLKVFEELLLDADWSLNAGNWLWLSGSAFFHRYFHVYSPVAFGKKTDRDGAYIRKYLPLVKDFPTE  
YIYEPWKAPRAVQERAGCLVGTHYPRPIVEHGAASKRNLGRMKAAR  
>Oceanites\_ocea\_\_NXF54397.1  
WFASENKCFFTIPCRFLLQCLEDLDANLRKLNLSRLFVIRGQPADVFPRLFKEWNI AKLSIEYDSEPFGERDA  
AIKKLASEAGVEVIVRISHTLYDLDKIIELNGGQPPLTYKRFQTLISRMEPLEMPVETITPEVMEKCTTPVSD  
DHDEKYGVPSLEELGFDTDGLPSAVWPGGETEALTRLERHLERKAWVANFERPRMNANSLLASPTGLSPYLRF

GCLSCRLFYFKLTDLYKKVKKNSSPPLSLYGQLLWREFFYTAATNNPRFDKMEGNPICVQIPWDRNPEALAKW  
AEGRTGFPWIDAIMTQLRQEGWIHHLARHAVACFLTRGDLWISWEEGMKVFEELLLDADWSVNAGSWMWLSCS  
SFFQQFFHCYCPVGFGRRTDPNGDYIRRYLPVLRGFPKAYIYDPWNAPESVQKAAKCIIGVNYPKPMVNHAESA  
SRLNIERMKQIYQQLSRYRGLGLLATVPSNPNGNGGMLMGYSPGESISGCGSTGGHLFPASPGAQLGTGDGH  
TVVQPCALGDSHTGASGIQQQGYCQASSILHYAHGDNQQSHLLQAGRTALGTGISAGKRPNPEEETQSVGPKV  
QRQSTN

>Oceanites\_ocea\_\_NXF54996.1

DNWAFLYAQRLALKQELPLHVCFLVPKFLGATIRHYGFMLRGLQEVAKECAELNIPFHLLLGyakdVLPVfV  
VEHGVGGLVTDfCPLRLPRQWVEDVRERLPEDVPFAQVDAHNIVPCWVASPKQEYSARTIRGKIHAQLPEFLT  
EFFPAIVHHPYPPSPCSEPIAWEACYSSQLQVDRTVKEVEWATPGTAAGLAVLQSFIAERLKSFGSHRNDPNKSA  
LSNLSPWfHFHGQVSTQRAILEVQKHRGKYKESVDafVEEAVVRRELAENFCYYNENYDSVQGayDWAQTTLKL  
HTKDKRPFLYELQELEQGTTHDPLWNAaQLQMVREGKMHGFLRMYWAKKILEWTRSPeeALRfAIYLNDryEL  
DGRDPNGYVGKLQGCfLWSICGIHDQGWAERAIFGKIRYMNYAGCKRKfDVGQfERRYAPH

>Oceanodroma\_teth\_\_NXH68236.1

DNWAFLYAQRLALKQELPLRVCFCLVPKFLDATIRHYGFMLRGLQEVAKECTELNIPFHLLLGyakdVLPafV  
VEHGVGGLVTDfCPLRLPRQWVEDVRERLPEDVPFAQVDAHNIVPCWVTSPKQEYSARTIRGKIHAQLPEFLT  
EFFPVIRHPYAPSClAEPIAWEACYSSQLQVDCTVKEVEWATPGTAAGLAVLQSFIVERLKSFGSHRNDPNKEA  
LSNLSPWfHFHGQVSTQRAILEVQKHRSEYKESVDafVEEAVVRRELAENFCYYNENYDSVQGayDWAQTTLKL  
HAKDKRPFLYELQELEQGTTHDPLWNAaQLQMVREGKMHGFLRMYWAKKILEWTRSPeeALRfAIYLNDryEL  
DGRDPNGYVGKLQDGMGLGCLWSICGIHDQGWAERAIFGKIRYMNYAGCKRKfDVSQfEHRYAP

>Oceanodroma\_teth\_\_NXH68960.1

KVDYDVCsNYGNWLYSAGIGNDPRDNRKfNMiKQGLDYDGNGDYVRLWVPeLQGIKGADIHTPWALNSAALSQ  
AGVTLGETYPQPvVTAPEWSRHINQRpQGRSPHPRGRRGPAHMPVQHkDRGIDfYfSRKKDV

>Oceanodroma\_teth\_\_NXH74094.1

MQHSSIHWFRKGLRLHDNPALLAAAGCCRLHPLFIldPSSSRAGANAQRfLLDtlRDLDGSLQEMGSRLfVv  
RGCPeeVfPRLfHAWGTTRLTfEVDTEPPARRRDTAVAElaARHGVEVIREVShtLYDTERVLALNDGKAPLT  
YKRLQsLLASLGpPEKpAPALRQEHLRGCRTPCQVSHDADYGVPTLEELGQDPAEMGPHLYPGGETAALARLD  
VMERTAWVCGfKKpETEPTSLSPSTTVLSPYLTFGCLSVRTfFWRLDEVYQRREHSRPPVSLHGQLLWREff  
YTAGAGIPNFdQMVGNPVCLQVDWDDNPQHlRAWREGQTGYPFIDAIMTQLRTEGWIHHLARHAVACFLTRGD  
LWWSWEEGLKVFEELLLDADWSlNAGNWlWLSGSaffHRYfHVYSPIAFgKKtDRDGAYIRKYLpVLKDFPAE  
YIYEPWKAPRAVQEQAGLVGIHYpQPIVEHRAASERNLGRMKAAr

>Oceanodroma\_teth\_\_NXH75833.1

MPHRTIHLFRKGLRLHDNPtLLAALESSEVVYPVYILDRKfMMSVMHIGALRWHfLLQsLEDLQqNLCQLGSC  
LLVIQGEYESVLrdHIQKWNITQVTLDAEIEPFYKEMeANIQRlGEELGfEVLsLVGHsLYDtkRILdLNGGT  
PPLTYKRfLHILSLLDpEVpVRNLtAEDfQRCRPPDPGLAEcyRVPLpVDLKiPPESLSPWRGGETKGLQRL  
EQHLIDQGWVASfTKPRTIPNSLlPSTTGLSPYfSMGCLSVRTfFYRLSNIYAQAkhHSLPPVSLQGQLLWRE  
FFYTVASATPNfTKMAGNPIClQISWYEDAERLHKWkTAQTGFpWIDAIMTQLRQEGWIHHLARHAVACFLTR  
GDLWISWEEGMKVFEELLLDADYSINAGNWmWLSASaffHQYTRIFCPVRfGKRtDPEGQYIRKYLpVLKNfP  
SKYIYEPWTASEEEQKQAGCIIGQDYPFPMVNHKEASDhNLQlMKQVREEQHRTAQlTRDDTDDPMEMKVKRd  
HSEENISKEKVARmTE

>Oceanodroma\_teth\_\_NXH76752.1

HFAYfVPRIIElNGHKPPLTYKRfQAIISRMELPKKPVSTVMSEQMETCKVDIQENHDDVYGVPSLEELGfPT  
DGLAPAVWQGETEALARLDKHLERKAWVANYERPRMNANSLLASPTGLSPYLRFGCLSCRLfYYRLWELyKK  
VKRNSTPPLSLYGQLLWREFFYTAATNNPKfDRMEGNPICiQIPWDRNPEALAKWAEGKTGFpWIDAIMTQLR  
QEGWIHHLARHAVACFLTRGDLWISWESGVRVfDELlLDADfSVNAGSWMWLSCSaffQQFFHCYCPVGFGRR  
TDPsGDYVKRYLPKLKGfPSRYIYEPWNAPESVQKAAKCIIGVDYPKPMVNHAETSRLNIERMKQIYQQLSRY  
RGLCLLASVPSCVEDLSGPVtDSASGQGCSTStAMRLSQAQASPKRKHEGAELCAEELYKRAKVTCLPAPE  
IPGKT

>Oceanodroma\_teth\_\_NXH78450.1

RfLLQCLELDANlRKlNSRLfVIRGQPADVfPRLfKEWNIaKLSIEYDSEPFgKERDAAIKKLASEAGVEVI  
VRIShtLYDLdKiIElNGGQpPLTYKRfQTLISRMELPMPVETITPEVMEKCTTPVSDDHDEKYGVPSLEEL  
GfDtdGLPSAVWPGETEALTRLERHLERKAWVANfERPRMNANSLLASPTGLSPYLRFGCLSCRLfYFKLTD  
LYKKVKKNSSPPLSLYGQLLWREFFYTAATNNPRFDKMEGNPICVQIPWDRNPEALAKWAEGRTGFPWIDAIM  
TQLRQEGWIHHLARHAVACFLTRGDLWISWEEGMKVFEELLLDADWSVNAGSWMWLSCSSFFQQFFHCYCPVG  
FGRRTDPNGDYIRRYLPVLRGFPKAYIYDPWNAPEsIQKAAKCIIGVNYPKPMVNHAeASRLNIERMKQIYQQLSRY  
LSRYRGLGLLATVPSNPNGNGGMLMGYSPGESISGCGSTGGTQLGTGDGHTVVQPCALGDPHTGASGIQQQG  
YCQASSILHYAHGDNQQSHLLQAGRTALGTGISAGKRPNPEEETQSVGPKVQRQSTs

>Ochotona\_curz\_\_XP\_040836089.1

MMAATAVPAAAPAAAGASSVHWFRKGLRLHDNPALLAAVRGARCVRcVYILDPWfAASSSVGINRWRfLLQs  
LEDLDtSLRKLNSRLfVVRGQPADVfPRLfKEWGVTRLTfEYDSEPFgKERDAAIMKMAKEAGVEVVTENSht

LYDLDRIIELNGQKPPLTYKRFQAIISRMELPRKPVGSVTSEQMESCRAEIQDNHDESYGVPSLEELGFPTEG  
LGPAVWQGGETEALARLDKHLERKAWVANYERPRMNANSLLASPTGLSPYLRFGCLSCRLFYRLWDLYKKVK  
RNSTPPLSLFGQLLWREFFFYTAATNNPRFDRMEGNPICIQIPWDRNPEALAKWAEKGTYGPWIDAIMTQLRQE  
GWIHHLARHAVACFLTRGDLWVSWESGVRVFEDELLDADFVNAGSMMWLSCSAFFQQFFHCYCPVGFGRRTD  
PSGDYIRRYLPKLKGFPSRYIYEPWNAPESVQKAAKCIIGVDYPRPIVNHAETSRLNIERMKQIYQQLSRYRG  
LCLLASVPSCVEDLSHPVAEPSSSQAGNVSSSTGPRPLSSGPASPKRKLEAAEEPPGEELSKRARVAEVPAPEL  
PSKAV

>Ochotona\_curz\_\_XP\_040840948.1

MGVNAVHWFRKGLRLHDNPALKECIQGADTIRCVYILDPWFAGSSNVGINRWRFLQCLELDANLRKLNSRL  
FVIRGQPADVFPRLFKAWNITKLSIEYDSEFPFGKERDAAIKKLATEAGVEVIVRISHTLYDLDKIIELNGGQP  
PLTYKRFQTLISKMEPLEIPVETITSEVIEKCTTPLSEDHDEKYGVPSLEELGFDTDGLSSAVWPGGETEALT  
RLERHLERKAWVANFERPRMNANSLLASPTGLSPYLRFGCLSCRLFYFKLTDLYKKVKKNSSPPLSLYGQLLW  
REFFFYTAATNNPRFDKMEGNPICVQIPWDKNPEALAKWAEGRGTFGPWIDAIMTQLRQEGWIHHLARHAVACFL  
TRGDLWISWEEGMKVFEELLLDADWSINAGSMMWLSCSSFFQQFFHCYCPVGFGRRTDPNGDYIRRYLPVLRG  
FPAKYIYDPWNAPEGIQKVAKCLIGVNYPKPMVNHAEEASRLNIERMKQIYQQLSRYRGLGLLASVPSNPNGNG  
GLMGYSYPGENIPGCSNSGSCPQGSGLHCGHGDSSQOQTHLLKQGRGSLGTGISSGKRPSQEEDTQSIGPKVQRQ  
STN

>Ochotona\_prin\_\_XP\_004585434.1

MMAATAAPAAVPAAGASSVHWFRKGLRLHDNPALLAAVRGARCVRVYILDPWFAASSSVGINRWRFLQSL  
LEDLDTSLRKLNSRLFVVRGQPADVFPRLFKEWGVTTLTFEYDSEFPFGKERDAAIMKMAREAGVEVVTENSHT  
LYDLDRIIELNGQKPPLTYKRFQAIISRMELPRKPVGSVTSEQMESCRAEIQDNHDESYGVPSLEELGFPTEG  
LGPAVWQGGETEALARLDKHLERKAWVANYERPRMNANSLLASPTGLSPYLRFGCLSCRLFYRLWDLYKKVK  
RNSTPPLSLFGQLLWREFFFYTAATNNPRFDRMEGNPICIQIPWDRNPEALAKWAEKGTYGPWIDAIMTQLRQE  
GWIHHLARHAVACFLTRGDLWVSWESGVRVFEDELLDADFVNAGSMMWLSCSAFFQQFFHCYCPVGFGRRTD  
PSGDYIRRYLPKLKGFPSRYIYEPWNAPESVQKAAKCIIGVDYPRPIVNHAETSRLNIERMKQIYQQLSRYRG  
LCLLASVPSCVEDLSHPVAEPSSSQAGNVSSSTGPRPLSSGPASPKRKLEAAEEPPGEELSKRARVAVVPAPEL  
PSKAV

>Ochotona\_prin\_\_XP\_004589630.1

MGVNAVHWFRKGLRLHDNPALKECIQGADTIRCVYILDPWFAGSSNVGINRWRFLQCLELDANLRKLNSRL  
FVIRGQPADVFPRLFKAWNITKLSIEYDSEFPFGKERDAAIKKLATEAGVEVIVRISHTLYDLDKIIELNGGQP  
PLTYKRFQTLISKMEPLEIPVETITSEVIEKCTTPLSEDHDEKYGVPSLEELGFDTDGLSSAVWPGGETEALT  
RLERHLERKAWVANFERPRMNANSLLASPTGLSPYLRFGCLSCRLFYFKLTDLYKKVKKNSSPPLSLYGQLLW  
REFFFYTAATNNPRFDKMEGNPICVQIPWDKNPEALAKWAEGRGTFGPWIDAIMTQLRQEGWIHHLARHAVACFL  
TRGDLWISWEEGMKVFEELLLDADWSINAGSMMWLSCSSFFQQFFHCYCPVGFGRRTDPNGDYIRRYLPVLRG  
FPAKYIYDPWNAPEGIQKVAKCLIGVNYPKPMVNHAEEASRLNIERMKQIYQQLSRYRGLGLLASVPSNPNGNG  
GLMGYSYPGENIPGCSNSGSCPQGSGLHCGHGDSSQOQTHLLKQGRGSLDTGISSGKRPSQEEDTQSIGPKVQRQ  
STN

>Octopus\_bima\_\_KOG00441.1

MSNESGKHVIHWFRKGLRLHDNPALMEALKGATTLRCIYTLDPWFAGSSQVGINKWGFLNLCLEDLDDSLRKL  
NSRLFVIRGQPANMFPQLFKAWNINTLSFEDDPEPFGKDRDNAICTLAREAGVEVIIRTCHTLYESQKILDNL  
GGRPPLTYNKFQKILENMKMPPKPLDIITASDWGNCQTPSSDHDDKYGVPTLEDLGFETEGDLAHHFGGES  
EALARLDRHLERKIKKKNIPLSLHGLLWREFFFYTVASNNPRFDQMLGNPVCVQIPWDTNQEALAKWAEGMT  
GFPWIDAIMKQLRKEGWIHHLARHSVACFLTRGDLWLSWEEGMKVFEDELLDADWSVNAGMWWLSCSSFFQQ  
FFHCYCPVGFGKRIDPNGDFIRHYLPILKRFPKYIYEPWNAPESVQKTAKCIVGKDYPPVPMVTHSEVSRINM  
ERMRQVYHRLTMRTPAVISKPIHSRENLTYSRIHHNYPMVQHNVHSRPVLLSQN

>Octopus\_bima\_\_XP\_014774572.1

MSVKDCNGVMKHEKKKKIAVHWFRHGQRLHDNPALVNALKDCDEFYPVFIIDGGEVAGTKLCGFNRWRFLLENL  
KDLDESFAEYGGRLYTFQGKPVFVKNLQKEWGITHITAEIDPEPIWQERDDAVKEFCQKSGIECDFFTSHTL  
WDPKLLKKNGGTPPLTFELFQLVTSSLGPPRLPLDTPTFEGVKMPLPENHEKFAVPTLKSGLIDPEFEEQKS  
PINVFIGGEKRALVLLKARLEKEAQSFHGGQCLPNHQEQPELLARAVSLSPYLRFGCVSIRKTYWDICDITYKR  
IKKVEAPNEIVCQLYWREYFYIMSIDNINFDKIENNPYCLKINWQYNEEFLLKKWEMGQTGPWIDAIMNQLR  
EGWNHHVGRHAVSCFLTRGDLWVSWEDGLKFLKYQLDADWSVCAGNMMWVSSSAFEKALQCPTCYSPPVYGM  
RMDRNGDFVKTYVPVLKDMPLKYLFCPWKAPLEIQEKANCIIGKDYPEPIVMHRDASKQNMTKMYKVKEHLLH  
QDVPCHGPTNETEVWKFAWLPPIEHDLAHNI

>Octopus\_bima\_\_XP\_014780460.1

MRHELFLQYLFILDNWMALFAQRLALKEKTSLVHCFVVPFLEATKRHYDFLLNGLKEVEKECCNLDIQFHL  
LKGDPSSEVSSLVKELNIGAVVTDFSPRLRPRKWLTDLTENLPKNVGLCQVDTHNIVPCWITSEKQYEGARTI  
RNKIHSQMCNFLTFFPPVIKHPHKAKTEAKPTNWNTIIGKSDIDETVKPVDWAKPGTVAGYATLESFCNERLK  
HFATERNDPTKNSLSNLSPLWRFHGHISQRCILVVKFKQKSYKNSVDAFVEEAVIRSELADNYCYQKDYDNI  
NGAYEWARNSLKQHAQKREYVYSRKVFEEGKTHDQLWNAAQIQLVKEGKMHGFLRMYWAKKILEWSTTPSEA

LEIAIYLNDRYSLDGDIDSNQYVGCMMWSVCAIHDRAWGERKIIIGKIRIMTYEGCKRKFDVDAIITKYCSKNSKK  
I

>Octopus\_sin\_XP\_029634730.1\_cry-1

MSMNDNCGVMKHEKKQKIAVHWFRHGQRLHDNPALVNALKDCDEFYPVFI FDGEVAGTKLCGFNRWRFLLENL  
KDLDESFAEYGGRLYTFQGDPI DVFKNLQKEWGITHITAEIDPEPIWLERDDAVKKFCQKSGIECDFFTSHTL  
WDPQLLLKKNGGTPPLTFELFQLVTSSLGPPRLPLDTPNFEGVKMPLPENHDKFAVPTLKS LGIHPEFEEQKS  
PINVFIGGEKRALVLLKARLEKEAQSF RHGQCLPNHQEQPELLARAVSLSPYLRFGCVSIRKTYWDICDTYKK  
IKNVEAPNEIVCQLYWREYFYIMSIDNINFDKIENNPYCLKINWQYNEEFLKKWEMGQTGYPWIDAIMNQLRF  
EGWNHHVGRHAVSCFLTRGDLWVSWEDGLKTFLKYQLDADWSVCAGNWMWVSSSAFEKALQCPTCYS PVMYGM  
RMDRNGDFVKTYVPVLKDMPLKYLFCPWKAPLEIQEKANCIIGKDYPEPIVMHRDASKQNMAMKYKVKEHLLH  
QDVPHCGPTNETEVWKF AWPPIEHHDLAHNI

>Octopus\_sin\_XP\_029646224.1\_cry-1\_X1

MSNESGKHVIHWFRKGLRLHDNPALMEALKGATTLRCIYTLDPWFAGSSQVGINKWGFLLNCLEDLDDSLRKL  
NSRLFVIRGQPANMFPQLFKAWNINTLSFEDDPEPFGKDRDNAICTLAREAGVEVI IRTCHTLYESQKILDNL  
GGRPPLTYNKFQKILENMKMPPKPLDIITANDWGNCQTP LSSDHDDKYGVPTLEDLGFDTEGLDLAHFHGGES  
EALARLDRHLERKAWVASFEKPKMTPQSMFPSHTALSPYLRFSCLSPRLFYWKLT ELYRKIKKKNIPLSLHG  
QLLWREFFYTVA SNNPRFDQMLGNPVCVQIPWDTNQEALAKWAEGMTGFPWIDAIMKQLRKEGWIHHLARHSV  
ACFLTRGDLWLSWEEGMKV FDEL LLDADWSVNAGMWMWLS CSSSFFQQFFHCYCPVGFGKRIDPNGDFIRHYLP  
ILKRFP AKYIYEPWNAPE SVQKTAKCIVGKDYPIMVTHSEVSRINMERMRQVYHRLTMRTPAVISKPIHSRE  
NLTYSKIYHRNP TTNGILLMGLNCNSAASNRKEVTQDI

>Octopus\_sin\_XP\_029648244.1\_photolyase

MAKRTANSKIEDEPADLKKSKNESLVEKIQESRIKCAKSVQDFKFNKKRVRL LNEVEEFLEGSQGVLYWMVRD  
QRVQDNWAMLFAQRLALKEKTS LHVCFCVVPFLEATKRHYDFLLNGLKEVEKECCNLDIQFHLLKGDPSSEV  
SSLVKELNIGAVVTDFSPRLRPRKWLTDLTENLPKNVGLCQVDTHNIVPCWITSEKQEY GARTIRNKIHSQMC  
NFLTEFPPIKHPHEAKTEAKPTDWTNIIIGKSDTDEAVKPV DWAKPGTAAGYATLESFCNERLKH FATERNDP  
TKNSLSNLSPWLRFGHISPQR CILVVKFKQSKHNSVD AFVEEAVIRSELADNYCY YQKDYDNINGAYEWARN  
SLKQHAKDKREYIYSRKEFEEGKTHDQLWNAAQIQLVKEGKMHGFLRMYWAKKILEWSTTPSEALEIAIFLND  
RYSLDGMDSNQYVGCMMWSVCAIHDRAWGERNVIGKIRIMTYQGCKRKFDVDSYITKYCSKNSKKI

>Odontophorus\_guja\_\_NXJ03486.1

MPHRTIHLFRKGLRLHDNPALLAALQSSEVVYPVYILDRAFMTSVMHIGTLRWHFLLQSLEDLRNSLCQLGSC  
LLVIQGEYVAVVRDHVQKWNITQVTLD AEMEPFYKEMEANIRGLGEELGF EVLSLVGHSLYDTQRILELNGGT  
PPLTYKRFLHILSL LGDPEVPVRNLTAEDFQRCSPPELSLAEHYGVPLPVDLKIP PESISPWRGGESEGLQRL  
EQHLANQGWVASFTKPKTAPNSLLPSTTGLSPYFSMGCLSVRSFFYRLSNIYAQAKHHS LPPVSLQGQLLWRE  
FFYTVA SATPNFTKMAGNPICLQIRWYEDAERLHKWKT VTRCTSVMAAFWLGAFGMADSCFLLQAQTGF PWID  
AIMTQLRQEGWIIHHLARHAAACFLTRGDLWISWEEGMKVFEELLLDADYSINAGNWMWLSASAFFHQYTRIFC  
PVRFGRRTDPEGQYIRKYL PVLKNFPSKYIYEPWTASEEEQKQAGCIIGRDY PPFPMVDHKEASSHNLQLMKQV  
REEQYRTAQLTRDDADDP MEMKLKRDHSEENLT KTKAARMT E

>Odontophorus\_guja\_\_NXJ10722.1

MGVNAVHWFVRKGLRLHDNPALKECIRGADTVRCVYILDPWFAGSSNVGINRWRFL LQCLEDLDANLRKLNSRL  
FVIRGQPADVFPRLFKEW SIAKLSIEYDSEPF GKERDAAIKKLASEAGVEVIVRISHTLYDLDKI IELNGGQP  
PLTYKR FQTLISRMEPLEMPVETITPEAMQKCTTPVSDDHDEKYGVPSLEELGFDTDGLPSAVWPGGETEALT  
RLERHLERKAWVANFERPRMNANSL LASPTGLSPYLRFGCLSCRLFYFKLTDLYKKVKKNSSPPLSLY GQLLW  
REFFYTAATNNPRFDKMEGNPICVQIPWDKNPEALAKWAEGRTGFPWIDAIMTQLRQEGWIIHHLARHAVACFL  
TRGDLWISWEEGMKVFEELLLDADWSVNAGSWMWLS CSSSFFQQFFHCYCPVGFGRRTPNGDYIRRYLPVLRG  
FPAKYIYDPWNAPE SVQKAACVIGVNYPKPMVNHA EASRLNIERMKQIYQQLSRYRGLGLLATVPSNPNGNG  
NGGLMSFSPGESISGCSSTGGAPLGTGDGQTVGVQTALGD SHTGGSGVQQQGYCQASSILRYAHGDNQQSHL  
IQPGRASLGAGISAGKRPNPEEETQSVGPKVQRQSTN

>Odontophorus\_guja\_\_NXJ13662.1

CIIYILDPWF AASSAVGINRWRFL LQSLEDLDNSLRKLNSRLFVVRGQPTDVFPRLFKEWGVTRLTFEYDSEPF  
GKERDAAI IKLAKEAGVEVVIENSHTLYDL DRI IELNGNKPPLTYKR FQAI INRMELPKKPVS SIVSQMETC  
KVDIQENHDDVYGVPSLEELGFPTDGLAPAVWQGGETEALARLDKHLERKAWVAN YERPRMNANSL LASPTGL  
SPYLRFGCLSCRLFYRLWELYKKVKNRSTPPLSLY GQLLWREFFYTAATNNPKFDRMEGNPICIQIPWDKNP  
EALAKWAEGKTGFPWIDAIMTQLRQEGWIIHHLARHAVACFLTRGDLWISWESGVRVFDEL LLDADFSVNAGSW  
MWLSCSAFFQQFFHCYCPVGFGRRTPDPSGDYVKRYLPKLKGFP SRYIYEPWNAPE SVQKAACIIIGVDYPKPM  
VNHAETSRLNIERMKQIYQQLSRYRGLCLLASVPSCVEDLSGPVTESAPGQGSSTSTAIRLPQSDQASPKRKH  
EGAEELCTEELYKRAKVTGLPAPEIPGKSS

>Odontophorus\_guja\_\_NXJ15161.1

DNWAFLYAQRLALKQELPLRVCFCLVPAFLDATIRHYSFMLRGLQEVAKECADLDIPFHLLLGCPKDKLP SFV  
VEHNVGGLVTD FCLRVPRQWVEEVKERLPEDVPFAQVDAHNIVPCWVTSSKQEYSARTIRAKIHNQLPEFLT  
EFFPPVIRHPHPPPNPPEPIAWDACYS SLQVDRTVTEVAWATPGTAAGLAMLQSFITKRLKS FSSQRNDPNKAA

LSNLSPWFFHFGQVSTQRAILEVQKHRRAYKESVDAFVEEAVVRRELAENFCYYNENYDSVQGAYDWAQSTLKL  
HAKDKRPFLYELPQLEQATTHDPLWNAQLQMVQEGKMHGFLRMYWAKKILEWTRSPPEALQFAIYLNDRYEL  
DGMDPNGYTDLPSCLAGCLWSICGIHDQGWKERDVF GKIRYMNYAGCKRKF DVEQFERRYTHCK  
>Odontotermes\_form\_QLJ82960.1  
MNAGSSEKHTVHWFRKGLRLHDNPSLREGLKSSTTFRCVFILDPWFAGSSNVGINKWRFLQLQCLEDLDQNLRK  
LNSRLFVIRGQPADALPKLFKEWGTNTLTFEEDPEPFGWVRDQONITAMCKELGITVISRVSHLYQLETI IKK  
NGGKAPLTYHQFQTIVASMETPPPTEPTINQHFLNGTYTPIGEDHDEKYGVPTLEELGFDTDGLLPPVWKGE  
SEALARLERHLERKAWVASFGRPKMTPQSLLASQTGLSPYLRFGCLSTRLFYYQLTDLYKKIKKAYPPLSLHG  
QLLWREFFYCAATKNPNFDMKSGNPICVQIPWDRNAEALAKWANGQTGF PWIDAIMTQLRQEGWIHHIARHAV  
ACFLTRGDLWISWEEGMKVFEELLLDADWSVNAGMWMWLSCSSFFQQFFHCYCPVRFGRKADPNGDYIRKYL  
VLKNFPTRYIHEPWNAPAEAVQKAAKCIIGKEYSLPMVNHAVASRINIERMKQVYQQLSKYRGPGLLATVPTSQ  
SRTSNTLNPTLGQKDFQKSSETKWEALPGVDINGYSLVICDEDFKTGIQSYCYKSQNKEEYE  
>Oedothorax\_gibb\_KAG8176361.1  
MSNPHGNSIHWFRKCLRLHDNPAIVDAAKSGGRFWPIFILDPIIAKNMKVGPNRWRFLVQSLRDLDSLQKFN  
SRLFVLRGKPKVEFPDIVKRWQVKCLTFESDTEPYAIERDREIENLMKELGVKVVTHATNLLYNPEQII EYNG  
KVPLTYQSFVNATAEKIGLPPQPSSSVEALEKLMSEKKLNTPPIEDTHDVEYGVPTLEELGVNESQLNPCKYPG  
GETEALKRLQKYLKPEEYICKFAKPDTPSPNSIEPSTTVLSPYVKFGCL SARLFYHEIRKVYLKSKKGYTKPPV  
SLHGQLFWREFYYTAGFATPNFDMVGNEVCTQIPWIENKEFLEAWTHARTGYPFIDAIMTQLRNEGWIHHLA  
RHAVACFLTRGDLWVSWEHGQKVFEELLLDADWSL NAGNWMWLSASAFFHQYRVYSPIAFGKKT DKN GDFIR  
KYVPVLKRFPPEYIYEPWKAPRKLQEQLGCVIGKDYPNRIVDHDKVRVENLRMDAAYKAKKDAKTSSSPKT  
PSPKKSTPKGKRSLETKKDSKITKFLKSK  
>Oedothorax\_gibb\_KAG8188597.1  
MSGKKKKTEDSGKPAVKKQKVEDSPEADLEFVKNVEDARKATAKSIKDFKFNKKRVRVISDAQDVPESA KSI  
YWMSRDQVRQDNWAF LKAQHLALKLDLPLCVCFCLVPKFLDATIRHYRFMLKGLKEVSEECESLNIHFHLLFG  
EAKDVLPKFVATNKVGGIVTDFCPLRVPLKWLSDVASKLPDDVPLVQVDAHNI VPCWVASDKQEYGARTIRKK  
IHDKLKEFLTDFFPVIKQKISAECKSEPINWEEVESTLEVNMDVGDVSWATPGTNAGLLKISDFCRNLKHFG  
DLRNDPTRNYLSNLSPWFFHFGQISIQRTILIVQKLKSKYSASVDAFVEEAVVRRELADNFCYNNKKYDKVEGA  
YDWAKNTLKDHA KDKREYIYTLKQFENSETHDLLWNAQRQMVKEGKMHGFLRMYWAKKILEWTKSPPEALEF  
AIYLN D KYELDGRDPNGYV GCMWSICGIHDQGWAERAVFGKIRFMNYKGCQRKFDVNDFISKYKKMK  
>Oedothorax\_gibb\_KAG8197157.1  
MTSQRQKNVHWFVRKGLRLHDQPALKEGLSGADTWRCVFILDPWFAGTSNIGINKWRFLQLCLENLDNNLRKL  
NSRLFVIRGQPADVFPRFLKLNVTHTLTIEKDPEPFGRI RDHNTTTMAMENGIVISRTSHTLYRLDKIIQKN  
GGNSPLTYKSFQNILATMESPPAPIPKITLEDIGNCFTPIGEDHEEKYGVPSLDELGFDTENLKPSVWIGGET  
EALSRLERHLERKAWVASFGRPKMTPQSLLPSQTGLSPYLRFGCLSPRLFYQELTELYRKIKKVNPPSLHGQ  
LLMREFFYCAATNNPKFDRMVG NPMCVQIPWDHNSEALKRWSNGLTGFPWIDAIMTQLREEGW IHLVARHAVA  
CFLTRGDLWISWEEGMKVFEELLLDADWSVNAGQMMWLSCSSFFQQFFHLFCPVRFGRKADPNGDYIRKYL  
LRNFPKYIHEPWTAPEKIQIVAKCIIGKDYVMPMVNHQEVSHINLERMKQVYQQLSHYKGTNTRNGTYPLGD  
NKEEGNPKSAKRQCVEFPENHDDAENRC  
>Oikopleura\_dio\_CBY34235.1\_unnamed\_pr  
MSNVSQVCPQLTSLLPPTSQQSTAEREQVLLSKQAMSSPPQKRKKTAKSEDDGVKIALFIFRRDLRLIDNTSL  
IQAIKDGYRILPVFVFPEQIDPEKNEWF SHPSVQFMCESLNDLGRQLKEEVDGKLHLMGGNLETIKKI KEV  
VNFSAIAYNEDYSVYARERDGEIEEWAESNNVEI I KEEDYGLLP IKDAWHHPKDGPPKPYRVLSIFFKHIQKF  
YDIRKPESNF EF EASQFTQSKFSFKFSISKLNTLYNANEKLAERGGRVLGLIGLEKIKNKKDYNETRNF MHLK  
AGTTKMSAHLKFGTVSIREMYWRTAELFGETHDLIRQLVFRDFY LKIYSHNP ELQRGTALQAGVDERIPWSD  
EKLWTAWCEGMTGFPLVDAAQRQLKEIGWQHNRMRMLTGCVLTKYFMIDWRKG MKFFYQNLVDADVFNN TAGW  
GWSSTGPDAPYFRPPFPNWIQSKKFDLEGYIKQYIPELADVSPADLHKWGDASIRAKYKKNKKVQAYPAP  
VVKHDEASKNAVYLYKKA FEEMKAAQNA  
>Oikopleura\_dioica\_CAG5112545.1\_Oidioi.mRN  
MERNITRHTLHWFRKGLRLHDNRPLLEAIRSSEAVYCVFCLDLEWMRANERIGNNRIRFLLESKLDLDDSLR  
KIGTRLFVLKGNARAAIKTFCREYEITQMTYMRDAEVFYRQLEAEILEEVNRREIVTRSFHGHTLYDPQEVID  
ANDGQVPLSLDEFYSVVGNDVPAPPAPTITGEMYKSCAVTIEDNHQAIYGVPTLASLGLECP RSLTRWPGE  
TVALERMRFKLERKNLFEFDQGPSTSKAGDHEY EIPGTTEPW FETQPETTGLSPYINLGSMSPRTFWHGAQGA  
PEKMRITVQGM IYREFFYTVA YTVNNFTKIEGNRICRDIKWSDPKNERVAEWIEKFKEGMTGYPWIDA A VRQ  
MKSEGWITHISRFSLASFLTVGQMWCSWEIGQQLFEFFLLDADYALNAGNFLWVTGSAFSNQVPLRAMDPVKI  
ARKWDTDG SFIRRYCPELKNLPTQYIYCPWKAPNDVQQQARTIIGVDYPEPMLNAATTRI QNLNKIKALNQQL  
RPDSDSDRDSL  
>Onchidium\_ree\_QDK59985.1\_cry\_1-like  
MKDNPTLSMSQTPRKHSLFWFRKGLRLHDNPALIAAIEGASTYRCVYILDPWFAGASQVGINKWRFLLESLE  
DLDSLRLKLNLSRLFVVRGQPADVLPRLFQEWGITTLA FEEDPEPYGKERDAAISAMAREFNIQVIAKSSHTLY  
DPKIVIAANGNSPPLTYKRFQSILSTLEPPHQPCETLTAQMVADVTTPITDDHDDRFSVP SLDELGFDTDSL

PAQFRGGESEALARLYRHLEKAWVASFERPKMSPQSLYPSGTGLSPYLRFGLCLSPRTFYWKLTLEYKKVKKG  
ADPPLALHGQLLWREFFYTATNNPNFDRMVGNSICVQIPWEHNPEALAKWAEGMTGYPWIDAIMVQLRKEGW  
IHHLARHAVACFLTRGDLWISWEEGMKVFDEMLLDADWSVNAGMWWLSCSAFFQQFFHCYCPVGFGRADPS  
GDFVRHYLPVLKGIPTQYIYEPWTAPESVQKAACCIIGKDYPLPMVQHSEASRINLERMRQVYKRLVLKSSAS  
KRIFLDLKILSVFPLSFHF

>Oncorhynchus\_gorb\_\_XP\_046149037.1

MSTSRTVICLLRNDLRLHDNEVFHWAQRNAEHIVPLYCFDPGHYLGTTANYNLPRGTGPFRLRFLLDLSIQDLRTS  
LIQRGSTLVVRRGRPQEVVGDILKQLGVSVAFAHEEVVPEDQQVERGVRDICSQMKVKVHTCWGSTLYHRDD  
LPFNHLSRLPDVYTQFRKAVETQGRVRPVLPTLDQLKPLPPGSGLDEGLIPSPEDLEQTDTVRDPRSAPPCSG  
GETQALARLQHYFWDTDTVATYKETRNLIGLDYSTKFSPLAIGCISPRYIYQQIKKYESERTANQSTYWV  
FELLWRDYFKFVGAKYGDRLEFDIKGLQDKSIPWKKDMNLFNAWKEGRTGVPFVDANMRELALTGFMSNRGRQN  
VASFLTKDLGLDWRMGAEFHYLLVDHVDSSNYGNWLYSAGIGNDPRENKRKNMIKQGLDYDNGDYVRHWIP  
ELKGIRGGEVHAPWTLSSASLSHARVSLNDTYPSPIVMAPEWSRHTNKKPTGAGPSARGKTGPSHTLKQHKDR  
GIDFYFSKSKNF

>Oncorhynchus\_gorb\_\_XP\_046160399.1

MAHTCIHWRKGLRLHDNPALVAALRDCKEIYPVFLDPCAPNNVKIGINRWKFLIGALKDLDCSLRKLNSRL  
FVVRGKPEEVFPKLFQKWKVTRLTIEYDTEPFSLRRDKEVVRLAEEHGVIIYKVSHTLYNIDRIIEENNGKA  
PLTYNRLQTLVSSIGPPKRPIPAPTSDDMKDVKTPCSEKHEEHYGISTLEKLYQDPESLTEELFPGGEQEALL  
RLDQHMERKEWVCGFEKPQTSPLNSLSPSTTVLSPYMTFGCLSVRTFWWSLTDVYQGGKHSKPPVSLHGQLLWR  
EFFYTAGLGIPNFDKMEGNPVCTQVDWDSNPEYLAAWAEARTGFPFIDAIMTQLRQEGWIHHLARHAVACFLT  
RGDLWISWEEGQKVFEELLLDGDWSLNAGNWQWLSASTFFHQFFRVYSPIVFGKKTDKNGDYIKKYLPHLKKY  
PAQYIYEPWKAPRSVQEAAGCIVGKDYPRPIVEHKVIRKKNIQRMKAAYAKRSPHSSDETPSKEKGLFPLSTA  
IGSASPNNLNSIG

>Oncorhynchus\_gorb\_\_XP\_046164461.1

MPVSGGEDPMSQVRQMLRELLVGRENAEGFFCLCVSVLGHNDTRTHFLPLIQLLATDHNRLHTTLTSIYLEYF  
SKDEDDLAVALALSLLEAKGQQQTNTKPLFPDPKLQGGTDTQATATYRPQNSSIQSQSVSPNGSSSQPPAP  
LPMGASYAQLAAVGGRRQTQAQHQDSTSPRRSSGHGSSPQTERQRGPTQTQKQTDIKWSNVTQDVCASIATLT  
SNLNQTKDDVTVECKVDQSEKPKRSKNRRQRRKGYGQVVGVPRCPSAPPPVLLWFRDLRLYDNPVIGSL  
EAGGPVPIPVFIWCPEEEEGPGVTVMGGACKFWLHQALSCLSSALEHIGSHLVFLQADEEREGIGSSLLALRS  
LVRETGAQTVLASALYEPWLRERDQVVVSALQKDRVEVNMVHSYCLRDPTYTTEGVGLRGIGSVSHFMSCCQ  
MNPGPGLGVPLDPPISLSPSPSVWPRGCPLEGLGLARMPCRKDGTIDWAANIRSSWDFSEEGAQSRLEAFLND  
GVYRYEKESGRADAPNTSCLSPYLHFGQLSARWLLWDTKGARCRSPKFIRKLAWRDLAYWQLTLFPLPWESL  
RPPYKALRWSNERGHLKAWQKGRGTGYPLVDAAMRQLWLTGWMNNYMRHVVASFLIAYLHLPWQEGYRWFQDTL  
VDADVAIDAMMWQNGGMCGLDHNFMHPVDAAMTCDPYGSYVRKWCSELAVLPDDLIHKPWKCPASMLRRAG  
VVLGQSYPERVVTDLEERSQSLQDVALVRRRFGEYVDPSCGCDLVPLPRLVSEAMGGGMVNTGGQFLLPVI  
TRMEFKHQSDPDADAASNPYNAVLGKGYVSRRRNETIAFLNQDTFTASVINEGAERRERQEQQDRMEGLPRP  
LAVEQRGKRTPAAKDRFSTVPGRVATSHR

>Oncorhynchus\_gorb\_\_XP\_046204321.1

MVGNTIHWFRKGLRLHDNPSSLKESIRGADTLRCVYILDVPWFAGSSNVGISRWRFLQCLEDLDASLRKLNSRL  
FVIRGQPTDVFPRLFQEWQTSQLSYEYDSEFPFGKERDAAIQKLASEAGVEVTVKVSHTLYDLDKIIEINGGQS  
PLTYKRFQALISHMDAVESPAEIIITAEVMRKCATPISDDHDDKFAVPSLEELGFETEGLATAVWPGGETEALT  
RLERHLEKAWVANFERPRMNATSLASPTGLSPYLRFGLCLSCRLFYFKLTDLYRKVKKNSSPPLSLYGLLW  
REFFYTATNNPRFDKMEGNPVCVQIPWDRNPEALAKWAEGRGTGFPWIDAIMTQLRLEGWIHHLARHAVACFL  
TRGDLWISWEEGMKVFEEELLDADWSVNAGSMMWLSCSSFFQQFFHCYCPVGFGRRTDPNGDYIRRYLPILKA  
FPAKYIFDPWNAPESVQKAACVIGMHYPKPMVHTEASRLNIQRMTOIYQQLSCYRGLGLLATVPANPNNGG  
NGVGTSPPEIQHEAVAQAGRGHAAVKRSSDLPGGSNKAQRQTSN

>Oncorhynchus\_gorb\_\_XP\_046216371.1

MHRSLLIIPASKHIWKFTLESQRHCSFTKLVGPPSSINNRTTMPAEKRKATFVKMDNTRQKLQAVKEGKRER  
VEGWLQDVVAEQRKEKDLKFNKQRLRFLSQTQKIKQSGSEGVVYWMNRDHRVQDNWALIYAQLLALEEKLPLH  
ICFCLVVPQNSELATIRHFGFMLRGLLEEVAKDCSALDIQFHLLQGSAGELLPGFVADWSFGAVTDFSPLRTP  
LQWVEEVKGLPSDIPFIQVDAHNVPVCWVASDKLEYSARTFRNKITKLLKEFLTEMLVDKHPHAALRTTKP  
VDWAEALSSLEVSTVEEVDWAKSGTAAGMAMLESFIDLRLKNFATQRNNPNSSAVSQLSPWIRFGHLSAQRV  
VLQVKCCGSAGESVSSFTEELVVRRELTDNFCFYNPYSYDVKGANDWAQKTLKDHAQKDPRIYVYTREQLEKS  
QTHDKLWNAAQYQMVIEGKMHGFLRMYWAKKILEWTSSEPGALSIAIYLNDRYELDGQDPNGFVGCMMWSICGV  
HDQKGKXPIFGNYMNSGGCTRKFDVAQFERKYCPKDL

>Opisthorchis\_vi\_OON18721.1

MAPQRAVLEVAALQYKYGRSVDVFIEEAFNRRELADNFCFHTPLYDRLQGARQWAQDTLHKHAGDKRDVAFTR  
AQLESSGTTDDLWNAAQRLVQTGKMHGFLRQYWAKKILEWCADGPEVAIQWAIYLNDRYSLDGTDPNGYVGI  
MWAICGVHDQGWPERRIFGKVRYMCYNGCRRWFSVPTFVSRSFSA

>Opitutae\_bac\_HAE11581.1\_DCG39\_0805

MSTSVVWFRKCLRLHDNPALSHACSDPSIDSLPLFILDPMSVMGPSFENLGSARLRFLESLLDDLDHRLKSKY  
GGKFLARARPLAVFENLHRVHRSGIGLVSSDYCSEPSGRDESVAIQKFFGKHSPKTDVRFHPSTHTLCDLEQ  
TIASPVYDNPKSMRQMESLASSIFGLDGSGLQFPEPLPEPRGMPPHPPEEIGIDSHRSSSSFSFHTVRALKQEL  
SSKGLTPTVFTIPFVGGETEALARMEKKVSSEPAFVNAFRKPRTSSTNSPNDPIEPSTTGLSPYLSTGCLSV  
RRIWKEVEKCNRQGAHSPPEESLHGQLLFREMFYLLSRSVENWDQDDGNPMCKPIDWGDRDEEKFLAWEEGRT  
GFPYIDAMMRQLETTGWMHHLGRHAVSCFLTRGQLWHHWHKGRDVFGRKLLDSDWALNNANWLWLAGVAPFSM  
PYFRLYNPCPDRESSLNVTSTAKFIKFWPELRNIPPRFIYEPHLAPVSVQKEAHCLVGSDYPNPIVIDRKKS  
AKENLAKFKLSLTA

>Oppiella\_nov\_CAD7637253.1\_unnamed\_pr

MHDDSPIKLDIFYLRQIKAIQQELASIQIPLIHTVPLWENIATEIDKLCHKLDIENVHANIECGVNELNRDFQ  
VQTQLNQSNRDLVLYHDRTLFPVGSIRNKSQNPYQVFGAFKKYCYEQLSISIPQCFPIPETQALNDAIDVGEL  
NNNSLPTLAELGFIFNPNQINKQWQIGEYALNVLDDEFIENKVRHYQLERQTGIPIVDAGMRQLLHTGWMHNR  
IRMVAMFLTKNLLIDWRLGEQWFMQHLIDGDLAANNGGWQWCASTGTDSAPYFRIFNPISQSQKFDAQGDYI  
RQWVPELAHLDAKTIHEPYAKNPNIELNYPKPIVDLQKSRIRAIEAFKQI

>Orbicella\_fav\_XP\_020602470.1\_cry\_DASH-1

MLLQMIRNLALRGCRVFEVHVGVFFAVRRSLFHSSRANQHREAGVTMETKAGKSVIYFVRNDLRVHDNECLYW  
AQQNGDFVIPLFCFDKNIFGHSAMTWHYKFAKTATHRAKFILESVSDLRETLKKHGSDDLVRSEQTAKAEVSE  
VINLCRQNNEGHISLVYQREITKEETDVEAELELCKTENVTVKCFWGLTLYHLEDLPFASVRSPLDPTYTGFR  
KNVETKCRVRPLIPAPDSLKSLPVFVANDHIGRIPTLKELVKDQSAETTDARTAFPFSGGETAALDRNLHYLW  
DTNLVASYKETRNLIGSDYSTKFSPWLAVGSLSPRKVFHCICKYETECTANQSTYWVIFELLWRDYFKFVSF  
KYGDSIFYLSGIMKKRGLPWKRDMPAFDQWRYGQTGVPFVDANMRELLHTGWMSNRGRQNVASFLVKDLGLDW  
RMGAEFWESLLLDHVDSSNYGNWNYSAGIGNDPRENKRKFMVKQALDYDPDGDVFRMWVPELAGLKGAKVHTP  
WMLSTLEVKHASVTLGENYPRPMVCPPEWNRHTSKVKDTAKWPRTQRRGVDFYFKSPKEASSSKKRH

>Orbicella\_fav\_XP\_020607172.1\_photolyase

MMGRKMRGLGKNQQWKRKVTCYVTKKNAGIHNKCCCMCCYSVARTFFVIAELSSSFYSFYLFSSRRRSHQQLFR  
NNFRFVCMASEPPAKRTKKEIAETSDSNGGDESILATYMAKRQVKCKSVVDFKFDKKRVRLITSNVDMPETCK  
GIAYWMWREQRVQDNWALLYAQRMAIKQEVPLVVCFCCLPSKYLDAAFRQYSFMITGLQEVEKELELNIPIFHM  
LLGEPDKVLPDFIKSKEIGGVVTDFTPMRTPMKWLENTAKELPKTVPCQVDGHNIVPCWQASPKEYGARTI  
RPKIQGQLKQFLTEFPVVIKHPYVAKDAAKTVDWKAVDEFIEVDRSVKEVEWAKPGTKAGLEMLETFCHERLK  
YFATDRNNPTKSALSNSLPWFHAGHISAQRAILRVREFRNSKESVEAFIEEAVVRRELADNFCFYNLDDHYDS  
IKGTNAWAQKTLQDHAQDKREYLYTREQLENGQTHDDLWNAAQQLQMVNEGKMHGFRLMYWAKKILEWTASPEE  
ALQVSLYLNDKFELDGNDPNGYVGCMWSVCGIHDQGWGERPVFGKIRYMNYNGCKRKFVDAEFVRKYGPGKDK  
SSVASTKSVLNRKRKAK

>Orbicella\_fav\_XP\_020612047.1\_cry-1-like

MLSEDSAPSKSLPASVKTNLYSYEAWRFCFSDLIFPFLGHRSLHWFRKDLRLHDNP SLRECLADSKVFYGVY  
FLECSAEDKMTVSPNRWHFLLQSLQDLDRGLAQCGSRLFVLKGRPMMDMLPSLFKEWGITRLSFEVDCEPFRKS  
RDAVITGLAQSGVEVISRVSHTLYDAEVLLMSTEGRAPQVFDEFMEVALQLGRPQMPAPRVNRQLFGSCLTP  
VARDHNQQYGVPTVEEIGFQKPAATSSWFYPGGEQEALTRMEALQMKKENDFCDSPLTANSLMPSASHLSFY  
LRLGCLSSRLLYQRMTEEYIKNKTVNPPPEVYSKLFWREFFFLVGSQVPGAHEMVNNSLSLQIPWEDSPEYLH  
KWKQGMTGFPWIDAIMRQLHLEGIWHDVARKAVGSFLTRGCLWISWEEGFKVFDELQLDAEWSLNVGNWLWLS  
GSTFVKEHVPWFPCVDVGKKIDPTGEYVRKYVPEVRNLPTNYIFEPWMAPRDLQESCGCVIGQDYPAPLVDHR  
QQRVVCVQRLRLDLAFKLSAIK

>Orbicella\_fav\_XP\_020614721.1\_cry-1-like

IDSIAPNYLLALLHNLCKFSLSLSIKNNGGTPPLTYKKFLAIIRSLGPPEHPVPTLDVQLLTGCSMPVSEDH  
EEKFGVPSLEELGLDIKNIPVEVWHGGEKEALVRLDRHLERKAWIASFEKPKVTPNSLFPSTGVSPYLRFGC  
LSPRLFYHRLTELYRKVKLGEPPIISLYGQLLWREFFFTVAANNPHFDRMATNPMCLQIPWRKSPERLQKWEEG  
KTGFPPWIDAIMVQLRQEGWIHHLARHAVGCFLTRGDLWISWEEGMKVFDRLWLLDAEWSLNAGNMMWLSYSAFF  
QQFFNCLCPVGFGRKLDPNGDYVRKYL PVLKGFPKYI HAPWTAPESVQKAARCIIGQDY PAPIVDHNKVS RV  
NLEKLRNIFKALLCYKDSFAVSSEKQDDVPDRQEKLEQMFLLEDKENE

>Orbicella\_fav\_XP\_020629231.1\_cry-1-like

MAAKTQRVHHTIHWFRKGLRLHDNQSLREACETSLTRPVYFIDPDYVKHGNMGFNRWRFLIQSLNDLDNNLK  
SLGSRFLVIQGKPELELPRLFKAWRITRLTFEVDHEPDGRQDRSKICELASEAGIEVETRVCHSLYDLDDKVE  
KNGGAAPLTYKKLSVSSMGPPLPKVPVAVDEQLFDGCSPTVDDENEYKLPTLEELGIEMPEESSTVLFPGGE  
TEALRRLDEHMEKEDWVCKFEKPNTSPNSLQSPSTTVLSPYVMFGCL SARLFYHRLSEVYSRAKKHSSPPVSLH  
GQLLWREFFFTAAAYATPNFNRMEGNPVCLQVPWDTNPEFVKAWSEARTGYPFIDAIMTQLRREGWIHHLARHA  
VACFLTRGDLWISWEEGLKVFEKYLLDHDWSLNAGNMMWLSASAFFHAYFRVYSPVAFGKKTDPNGDYIKKYI  
PVLKKYPPKYIYEPWTAPQSVQKAAGCVIGKDYPRPIVDHKVVVKTNITRMKKARADHYGESIDEDLDNKS  
SPTKRKNNKQSPTSSKLRKITDFTKK

>Orchesella\_cin\_ODM91467.1\_cry\_DASH,\_

CLVWFRNDLRFHDNEALLWAHEHAEFVIPVFCFDPQFETTTTHRYKFPKTGNRYAQFLIQSVEDLQKTLKEKG  
STLLVFNKRPEVTLSIIYDVCKYDAVVFQKEVTSEETEVEEACELFCTKNKIQFRPIWGSTLYHKDDLPTVK  
NCPNTYTQFRKDVEGRSKIRLEQPMPLKLLKHLPELTEISEELPSFEKLGLVEPTVHANTAFPFTGGETSALN  
RLQSYLWATGAIIENYKTTNRNGLLGSEYSTKFSPLAFGCISPRRVFFEIRKYEKERVKNDSYVWIFELLWRD  
YFRFIAIKFGNCLFFSGGVKKIRYKWEEDMEKFRKWADGKTGVFPVDANMRELLHTGWMSNRGRQNVASFLTK  
DLKLDWRLGAWEFYEYLLVDYDVCSNYGNWNYSAGIGNDPREDRKFNMIKQATDYDEGAYARTWVPELGGIQG  
GKIHPVWVLRPGELGSIKLGVDYPNPMIVAQEWRRHFDKTKSPGWTVSTKNKQKIDIFYKSNTSSHK

>Orchesella\_cin\_ODN01631.1\_cry-1

MESTESSSSKGVDKTVSVSILWFRHGLRLHDSAPAFIAATSNRDHLFLPLFIFDGESAGTKIVGFNMRFLIES  
LEDLNNFSSTKYGGSLTVLRGQPVDLFRKLSQKWKIAKICFEQDCEPIWKERDDGVKEFCKENGIEVVEECISH  
TLYDPAEILSANGGNPPYTYSSFMFVASTLGKPERPLSAPNPETEAGKINFFGMTGDDDDLALCQLHFPMTPE  
VFGVSKEKAVGENMRKGGETEGIIILEKRLAIEKQAFEQGLMLPNHTNPDFINGASLSPHLRFGCVSVRTFYW  
AVQDLFSAIVSGNTTTCETITGQLFWREYFYVMSVPNPNFDMKSNPICLNIPWAKDVIAKENLKKWKAGKTGY  
PFIDASMRQLIEQGWLHHVARNATACFLTRNDLWISWEKGLKHFLKYLLDADWSVCAGNWLWVSSSAFENVLD  
CTLICICPTRYAQRDLPEAKFIKRFIPELQNYPIPYVFEPWTAPLELQNWGCMIGKDYAPAPIVNHIEIVSKRNK  
AEMVSLQKMLAGGGLNEHPCPSNTNEARNFMWFPEICSHESP

>Orchesella\_cin\_ODN02944.1\_photolyase

MAGKSKAPEKKASSSSSKGTAKEDDAPAEKKKKEVEDFDGFNARIREQRKSEGSSQTFKFDKSRCRMITEDEN  
LPASHSGVLYWMSRDQRVQDNWALIYAQRLALKEKVPLFVCFCLVPKFLQATLRQYAFMLKGLRSVQKELVDL  
NIPFSLLFGEAKAVLPDFVKKHKIGGVVTDIFSPLRTPRAWVDEVAKKLPEDVPLCQVDAHNIVPVVWTSEKLE  
YAARTIRPKIHKHLPDYLTEFPDVISHPHKSSSKFENPFKNWDELMAFLKIDKTVGGEVWAKPGTAEAFQTLR  
SCDVSKLDFRSAGQRDDPDSGLTAVLEA

>Orchesella\_cin\_ODN04604.1\_cry-1

MDAFIFRFLQLQLEDLDQSLRKVNSRLFVIRGQPADVLPKCFKEWGTTCLTFEEDPEPFGRVRDQNIMAQCKE  
LNIDVSVKSSHTLYKLDVIIDKNGGKAPLTYRHFLNVVSYLDPPPQPEPTISLDFMKNSTYTPVNINHDDKYGV  
PSLEELGFDTNLRDPCWRGGEMEALARLERHLERKAYVATFGRPKMTPQSLMASQTGVSPYLRFGCLSPRLF  
YYQLDDLYRKIKNAEPPLSLHGQVLWREFFYCAATKNPNFDRMVGNPICVQIPWDKNSKALAKWANAKTGFPW  
IDAIMTQLREEGWIIHHIARHAVACFLTRGDLWISWEEGMKVFEELLLDTSVSNAGMWMWLSCSSFFQQFIHC  
YCPVRFGRKADPNGDFIRKYLPLVKMLPTQYIHEPWMAPEAVQKASKCIIIGKDYMPMINHAVAYRINIEMK  
QVYRSLPKYRPTDIHSFVQGTNNAGTPAPQMPIPLPEPDANFTTLDSDMINTAAANMDMNCDLSTKSLHDLLE  
SAINDTFGTVGTLS

>Orchesella\_cin\_ODN05388.1\_cry-2

MGTKSPPVVLHWFRKGLRLHDNPALERAVKFAKDNQAVVRPVFILDTELPKSYKIGANRYRFLVESLEDLDQS  
FRSLGTRLFVIRGKVQDVLENCFKTWNVKLITFENDTEPYSRARDTEFYKLAKKHGIPFEGFWSHTLYEPILL  
IKTNKGQTPKTYQKFIDVMTKTGQPPKSISTITSIPAHFKDPLLSSSTYDTPTLTELKVNAEELGPHLFKGGE  
TEALQRMDRSLANKHYVENFAKPNTSPNSIKPSTTVLSPYLKFGCLSCRLFYEKLQTFKGTKTTPVSLGQL  
YWREFYYLVGAQTPNFIQMKGNSICKQIPWDDNPEYVQAWKEGRTGYPFIDAIMTQLRTEGWIIHHLARHAVAC  
FLTRGDLWQHWEKGQDVFEYLLDADVYLNAGNWMWLSASAFFHQYYRVYSPIKFGQKTDTSGDYIRKYIPVL  
AKYPPEYIYEPWKAPQSVQKAAGCIVGRDYPKRIVEHETIVKINLTkmnkayakptsQPSPSKSDSKASLKRT  
ADTMSDDDDYADEVHPANTTSTKLPRNSNSNTSTSKRQMSILDAFAKAH

>Orcinus\_orca\_XP\_004264088.1

MAAAVATSÄVAVPAPAARAEGASSVHWFRKGLRLHDNPALQAAVRGACHMRCVYILDPWFAASSSVGINRWRF  
LLQSLLEDLDISLRKLNLSRLFVVRGQPADVFPRLFKEWGVTRLTFEYDSEPFGERDAAIMKMAKEAGVEVVTE  
NSHTLYDLDKIIELNGQKPPPTYKRFQAIISRMELPKKPVGSVTSQQMEGCRAEIQENHDETYGVPSLEELGF  
PTEGLGPAVWQGETEALARLDKHLERKAWVANYERPRMNANSLLASPTGLSPYLRFGCLSCRLFYYRLWDLY  
KKVKRSSTPPLSLFGQLLWREFFYTAATNNPRFDRMEGNPICIQIPWDRNPEALAKWAEKGTGFPWIDAIMTQ  
LRQEGWIIHHLARHAVACFLTRGDLWVSWESGVRVFDELLDADFVSNAGSWMWLSCSAFFQQFFHCYCPVGFG  
RRTDPGDIIRRYLPKLKGFPsryIYEPWNAPEsIQKAAKCIIGVDYPRPIVNHAEtsRLNIERMKQIYQQLS  
RYRGLCLLASVPSCMEDLSNPVAEPSSSQAGGMSSAGPRPLPSGPASPKRKLGAEEPPGEELSKRARVAGLP  
PSELLSKDV

>Orcinus\_orca\_XP\_004269459.1

MGVNAVHWFRRKGLRLHDNPALKECIQAGADTIRCvYILDPWFAGSSNVGINRWRFLLQCLELDANLRKLNLSRL  
FVIRGQPADVFPRLFKEWNITKLSIEYDSEPFGERDAAIKKLATEAGVEVIVRISHTLYDLDKIIELNGGQ  
PLTYKRFQTLISKMEPLEIPVETITSEVIEKCTTPLSDDHDEKYGVPSLEELGFDTDGLSSAVWPGGETEALT  
RLERHLERKAWVANFERPRMNANSLLASPTGLSPYLRFGCLSCRLFYFKLTDLYKKVKNSSPPLSLYGQLLW  
REFFYTAATNNPRFDMEGNPICVQIPWDKNPEALAKWAEGRGTGFPWIDAIMTQLRQEGWIIHHLARHAVACFL  
TRGDLWISWEEGMKVFEELLLDADWSINAGSWMWLSCSSFFQQFFHCYCPVGFGRRTPNGDIIRRYLPVLRG  
FPAKYIYDPWNAPEGIQKVAKCLIGVNPYKPMVNHAEASRLNIERMKQIYQQLSRYRGLGLLASVPSNPNGNG  
GLMGYSPPGENIPGYSSSGCTPGSGILHYAYGDSQQTHLLKQGRSSTCTGLSSGKRPSQEEDTQSIGPKVQRQ  
STN

>Ordospora\_col\_TBU15134.1\_photolyase

MDGRVEKKNEYMNKQNVLYMMRRDQRIHENYAVQLGYELSYEYRSQLYFGVEFFTLKMNARQRLFVLEGLAEL  
SKEARKYNIELFIIKDLMAFVKTYTIGCIIILDFCALRESILREQEIYRMCEEMKIELYVCDAHNIVPCKMLSK  
YKRTPKAVRTDLLKFFWQYLVAFNKVEVHKINKIDKEVKKEIDEEVKKEIEIDFEDARTIRKFVSATEIEGYL  
SRNKSNLERRNSISGGYSHGMKVMKNFFEGGRFKSFKSYRNDPDVDGNSGLSPWINFGQISAQEVVFFGCERF  
EKTNENLETFINEAFVWREIAEHFVLHESNYDNIEGALPWARESLLHACDKREIVFSQEQLESARTGYALWD  
AAQCQLMYSGRIHGIVRMWAKQLMWWTEDPRSALNIALYFNDTYAIDGNSPNGYLGVMWSICGSMDRAFKER  
EVVGKIRTMKAFKAPVYINRWREY

>Oreotrochilus\_mela\_NXU71630.1

RFLQCLELDLDANLRKLNSRLFVIRGQPADVFPRLFKEWNIAKLSIEYDSEPFGKERDAAIKKLASEAGVEVI  
VRISHTLYDLDKIIELNGGQPPLTYKRFQTLISRMEPLEMPVETITPEVMEKCTTPVSDDHDEKYGVPSLEEL  
GFDTDGLPSAVWPGGETEALTRLERHLERKAWVANFERPRMNANSLASPTGLSPYLRFGCLSCRLFYFKLTD  
LYKKVKKNSSPPLSLYGQLLWREFFYTAATNNPRFDMEGNPICVQIPWDKNPEALAKWAEGRTGFPWIDAIM  
TQLRQEGWIHHLARHAVACFLTRGDLWISWEEGMKVFEELLLDADWSVNAGSWMWLSCSSFFQQFFHCYCPVG  
FGRRTDPNGDYIRRYLPVLRGFPKYYIDPWNAPESVQKAAKCIIGVNYPKPMVNHAEASRLNIERMKQIYQQ  
LSRYRGLGLLATVPSPNPNNGNGGLMGYSPEGCVSGCGSTGGAQLGTGDGHTVVQPCALGESHTGASGIQQQG  
YCQASSILHYAHGDNQQSHLLQAGRTTLGTGISAGKRPNPEEETRGVGPVKVQRQSTS

>Oreotrochilus\_mela\_NXU79702.1

TRGSTLLTVFSLSVPKVDYDVCSNYGNWLYSAGVGNDPREHRKFNMVKQGLDYGKGDYVRLWVPELQSIKG  
ADIHTPWALNTAALSQAGVTLGETYPQPVVTAPEWSRHINQKPQGRSPHPRGKRGAHTPRQHRDRGIDFYFS  
HKKDL

>Oreotrochilus\_mela\_NXU80590.1

DNWAFLYAQRALKQELPLHVCFCLVPKFLDATIRHYGFMLRGLQEVTKCAELNIPFHLLLGyakDVLPAFV  
VEHGVGGLVTDfCPLRLPRQWVEDVKERLPEDVPFAQVDAHNIVPCWVTSPKQEYSARTIRGKIHAQLPEFLT  
EFFPVIHPYSPSCPAEPIAWEACYSSLQVDRTVKEVEWATPGTAAGMAVLKSFITERLKSFSSSHNDPNKAA  
LSNLSPWfHFGQVSTQRAILEVQKHRRTYKESVDAFVEEAHVRELAENFCYYNENYDSVQAYDWAQTTLNL  
HAKDKRPFLYKLQELEQGTTHDPLWNAQLQMVQEGKMHGFLRMWAKKILEWTRSPEEALQFAIYLNDRYEL  
DGRDPNGYVGCLWSICGIHDQGAERAIFGKIRYMNYAGCKRKFVGEFERRYAP

>Oreotrochilus\_mela\_NXU81457.1

RFLQSLLEDLDNSLRKMNSRLFVVRGQPTDVFPRLFKEWGVTRLTFEYDSEPFGKERDAAIIKLAKAGVEVV  
IENSHTLYDLDRIIELNGHKPPLTYKRFQAIISRMELPKKPVSTIMSQQMETCKVDIQENHDDVYGVPSLEEL  
GFPTGELGPAVWHGGETEALARLDKHLERKAWVANYERPRMNANSLASPTGLSPYLRFGCLSCRLFYRLWE  
LYKKVKRNSTPPLSLYGQLLWREFFYTAATNNPKFDRMEGNPICIQIPWDRNPEALAKWAEGKTGFPWIDAIM  
TQLRQEGWIHHLARHAVACFLTRGDLWISWESGVRVFDELLEDADFSVNAGSWMWLSCSAFFQQFFHCYCPVG  
FGRRTDPGSDYVKRYLPKLKGFPSRYIYEPWNAPEAVQKAAKCIIGVDYPKPMVNHAEATSRLNIERMKQIYQQ  
LSRYRGLCLLASVPSCVEDLGGPVTDSASGQGCSTSTAVRLLQADPASPKRKHEGAEELYSEELYKRAKMTGL  
PAPEIPDKSS

>Ornithorhynchus\_anatinus\_XP\_007666228.2\_cryptochro

MAAVTVAGAAGPAPAAAAAGAAASSVHWFRKGLRLHDNPALQAALRGARSVRCVYILDPWFAASSSVGINRWR  
FLLQSLLEDLDTSLRKLNSRLFVVRGQPTDVFPRLFKEWGVTRLTFEYDSEPFGKERDAAIVKMAKEAGVEVV  
ENSHTLYDLDRIIELNGQKPPLTYKRFQAIISRMELPKKPVSCVTSQQMEGCKAEIQDNHDDTYGVPSLEELG  
FPTDGLGPAVWQGETEALARLDKHLERKAWVANYERPRMNANSLASPTGLSPYLRFGCLSCRLFYRLWDL  
YKKVKRNSTPPLSLYGQLLWREFFYTAATNNPRFDRMEGNPICIQIPWDRNPEALAKWAEGKTGFPWIDAIMT  
QLRQEGWIHHLARHAVACFLTRGDLWVSWESGVRVFDELLEDADFSVNAGSWMWLSCSAFFQQFFHCYCPVG  
GRRTDPGSDYFIRRYLPKLKAFPSRYIYEPWNAPEAVQKAAKCVIGVDYPRPIVNHAEATSRLNIERMKQIYQQ  
LSRYRGLCLLASVPSCVEDLSSAAAESGLGQASGSNISTAPRPPPPYPGPASPKRKLEAAEGLPGEELCKRPKV  
AGRPGPEPPGEDA

>Ornithorhynchus\_ana\_XP\_028932146.1\_photolyase

MAPKKRRANASKIQVSEEDDVGVQRETEEKGTTEKLTQTGGPRKRLTNVATVAQAEKGSRAEEGGKGEVGS  
LQDAVPQARLRTAPSALAFRYDERRVRFISQGCHLKEDAKGVVYMSRDQRVQDNWAFLYAQRALALQRLPLH  
VCFCLVPSFLGATIRHFGFMLGGLKEVAKECKQLDIPFHLLPGLAKDTLPTFVRDHDIGAVTDFSPRLRLPLQ  
WVRDVRDGLPEVPLVQVDAHNIVPCWVASDKQEYAARTIRRKIHDRLSNFLTEFPPLVRHHPADPFAEPVD  
WQACRAGLQVDRTVGEVSWAQPGTAAGLTVLQTFIDQRLRIFSSSRNDPNKAALSNLSPWFHFGQVSVQRAIL  
EVRKQRHRYPDSVASFVEEAMVRRELADNFCFYNNENYDKVEGAYDWARTTLRHLAKDKRTHLYSLEQLEAGKT  
HDTLWNAQLQMVQEGKMHGFLRMWAKKILEWTRSPEEALFAIHLNDRFQLDGRDPNGYVGCMMWSICGIHD  
QGAEREVFGKIRYMNYAGCKRKFVDAQFEHKYSPRE

>Ornithorhynchus\_ana\_XP\_028935073.1\_cry-1

MGVNAVHWFRKGLRLHDNPALRDCVRGADTVRCVYILDPWFAGSSNVGINRWRFLQCLELDLDANLRKLNSRL  
FVIRGQPADVFPRLFKEWNIAKLSIEYDSEPFGKERDAAIKKLASEAGVEVIVRISHTLYELDKIIELNGGQP  
PLTYKRFQTLISRMDPLAMPVETITAEVMGKCMTPLSDDHDEKYGVPSLEELGFDTDGLPSAVWPGGETEALT

RLERHLERKAWVANFERPRMNANSLASPTGLSPYLRFGCLSCRLFYFKLTDLYKKVKKNSSPPLSLYGQLLW  
REFFFYTAATSNPRFDKMEGNPICVQIPWDRNPEALAKWAEGRGTGFPWIDAIMTQLRQEGWIHHLARHAVACFL  
TRGDLWISWEEGMKVFEELLLDADWSVNAGSMMWLSCSSFFQQFFHCYCPVGFGRRTDPNGDYIRRYLPVLRG  
FPAKYIYDPWNAPEGIQKAAKCIIGVNYPKPMVNHAESRLNIERMKQIYQQLSRYRGLGLLASVPSNPANG  
SGGLMAYSPGENIPGCSSGGGVQMGASESHLLQTCVLGESHLPSPGIQQQGRSSLTPGLSGGKRPCQEEESQS  
IGPKVQRQSTD

>Orussus\_abi\_XP\_012272812.1\_photolyase

MTYKMNEKPSIKKQKTSTLQTIILNNRKNAAASVMTFKFDKKRIRIITNIKEVTKKCRGILYWMFRDARVQDN  
WAFLEAQKIAIKNRVPLHVCFCILSKFLSSTTRQYRFLKGLNEVAIECNQLNINFHLLHGEPSLAIAEFISK  
YNIGGVVTDSPRLRPIRWINDLKGMIPCEIPICQVDAHNIIPCWITSNKLEYSARTIRNKINSQIDQFLTEF  
PPVIKHPYKASEQFEDINWETALNDVQAESIAELTWLTPGYKAGINQFETFLMDRLKDYYLKRNDPVENVTSN  
LSPWFHFGMISVQRCIIIEVQKYKCKFKQSVEAFMEEAIIRRELSDNFCFYNNYDNLQGANWAIIDLNFHRN  
DKREYIYDLHELEASLTHDDLWNSAQNLMMGKMHGFLRMYSKKILEWTRTPEQALEWSIYLNKYSIDGC  
DPNGYVGCMMWSICGIHDQGWKERNVFGKIRYMNYKGCQRKFNVAKFVADWGGKVHSHKRKKKNA

>Orussus\_abi\_XP\_012284945.1\_cry-1\_X1

MTGSLSELDQGPPTRGGRKHTVHWFRKGLRLHDNPRLDGLLGASTFRCVFLDPWFAGSTNVGINRWRFLL  
QCLEDLDCLSLRKLNSRLFVIRGQPADALPKLFKEWGTNTLTFEEDPEPFGVRDHNISTLCKELGISVVQSVS  
HTLYKLDKIIDRNGQSPLTYHQFNIVASMEPEPPVPTVTSACIGGAYTPLEDDHDDVYGVPTLEELGFSR  
PGATGAQWNDKKSRCRDPGRSHYKRRFPGFDTTEGLLPVWVGGESEALARLERHLERKAWVASFGRPKMTPQS  
LLPSQTGLSPFLRFGLSTRLFYYQLTDLYKKIKKTAPPLSLHGQLLWREFFFYCAATKNPNFDRMQGNPICVQ  
IPWDKNGEALAKWANGQTGFPWIDAIMTQLREEGWIHPLARHAVACFLTRGDLWISWEEGMKVFDELLFDADW  
SVNAGMMWLSCSSFFQQFFHCYCPVRFRKADPNQDYIRRYLPVLKNFPTRYIHEPWNAPLSVQRTAKCIIG  
KEYSRPMVNHSKTSRINIERMKQVYQQLNKYRGTVLLPEAHLSSRGCSHPEGNQEESPTSLEASWKVDGNATC  
R

>Orycteropus\_afer\_afer\_XP\_007944720.1

MAAAMATAAAAASAPTAEGASSVHWFRKGLRLHDNPALLEAVRGARCVRCVYILDPWFAASSSVGINRWRFLL  
QSLEDLDTSRLTNSRLFVVRGQPADVFPRLFKEWGVTRLTFEYDSEPFQKERDAAIVKMAKEAGVEVVTENS  
HTLYDLDRIIELNGQKPLTYKRFQAIISRMELPKKPVGSVTSQQMESCRAEIQENHDETYGVPSLEELGFPT  
EGLGPAVWQGGETEALARLDKHLERKAWVANAYERPRMNANSLASPTGLSPYLRFGCLSCRLFYRLWDLYKK  
VKRNSIPPLSLFGQLLWREFFFYTAATNNPRFDRMEGNPICIQIPWDRNPEALAKWAEKGTGFPWIDAIMTQLR  
QEGWIHHLARHAVACFLTRGDLWVSWESGVRVDELLDADFVNAGSMMWLSCSAFAFFQQFFHCYCPVGFGRR  
TDPGSDYIRRYLPKLKGFPSRYIYEPWNAPEVQKAAKCIIGVDYPRPIVNHAETSRLNIERMKQIYQQLSRY  
RGLCLLASVPSCVEDLSNPVAEPSSSQAGNLSSAGPRLLPGGPASPKRKLEAAEEPPGEELSKRARVAKLPSP  
ELPSKDV

>Orycteropus\_afer\_afer\_XP\_007946421.1

MGVNAVHWFRLKGLRLHDNPALKECIQGADTIRCVYILDPWFAGSSNVGINRWRFLLQCLEDLDANLRKLNSRL  
FVIRGQPADVFPRLFKEWDITKLSIEYDSEPFQKERDAAIKKLATEAGVEVIVRISHTLYDLDKIIELNGGQP  
PLTYKRFQTLISKMEPLEIPVETITSEVTEKCTTPVSDDHDEKYGVPSLEELGFDTDGLPSAVWPGGETEALT  
RLERHLERKAWVANFERPRMNANSLASPTGLSPYLRFGCLSCRLFYFKLTDLYKKVKKNSSPPLSLYGQLLW  
REFFFYTAATNNPRFDKMEGNPICVQIPWDKNPEALAKWAEGRGTGFPWIDAIMTQLRQEGWIHHLARHAVACFL  
TRGDLWISWEEGMKVFEELLLDADWSINAGSMMWLSCSSFFQQFFHCYCPVGFGRRTDPNGDYIRRYLPVLRG  
FPAKYIYDPWNAPEGIQKVAKCLIGINYPKPMVNHAESRLNIERMKQIYQQLSRYRGLGLLASVPSNPNGNG  
GLMSYSPGENVPGCSSSASCSQNGILHYAHGDSQQAHLLQQGRSSVGTGLSSGKRPSQEEETQSVGPKVQRQ  
STN

>Oryctolagus\_cuni\_XP\_002711467.1

MGVNAVHWFRLKGLRLHDNPALKECIQGADTIRCVYILDPWFAGSSNVGINRWRFLLQCLEDLDANLRKLNSRL  
FVIRGQPADVFPRLFKEWNITRLSIEYDSEPFQKERDAAIKKLASEAGVEVIVRISHTLYDLDKIIELNGGQP  
PLTYKRFQTLISKMEPLEIPVETITSDVIEKCTTPVSDDHDEKYGVPSLEELGFDTDGLSSAVWPGGETEALT  
RLERHLERKAWVANFERPRMNANSLASPTGLSPYLRFGCLSCRLFYFKLTDLYKKVKKNSSPPLSLYGQLLW  
REFFFYTAATNNPRFDKMEGNPICVQIPWDKNPEALAKWAEQGTGFPWIDAIMTQLRQEGWIHHLARHAVACFL  
TRGDLWISWEEGMKVFEELLLDADWSINAGSMMWLSCSSFFQQFFHCYCPVGFGRRTDPNGDYIRRYLPVLRG  
FPAKYIYDPWNAPEGIQKVAKCLIGINYPKPMVNHAESRLNIERMKQIYQQLSRYRGLGLLASVPSNPNGNG  
GLMGYSYSPGENIPGCSSSGSCSQSGSILHYAQGDTQQTQLLKQGRSSMGTGLSSGKRPSQEEEDTQSIGPKVQRQ  
STN

>Oryctolagus\_cuni\_XP\_008268424.1

MAAAAAGVPAAAAVPAPAASANGASSVHWFRKGLRLHDNPALLAAVRGARCVRCVYILDPWFAASSSVGINRW  
RFLQLEDLDTSRLKLNRLFVVRGQPTDVFPRLFKWGVTRLTFEYDSEPFQKERDAAIMKMAKEAGVEV  
TENSHTLYDLDRIIELNGQKPLTYKRFQAIISRMELPKKPVGSVTSQQLEGCRAEIQDNHDETYGVPSLEEL  
GFPTGLSPAVWQGGETEALARLDKHLERKAWVANAYERPRMNANSLASPTGLSPYLRFGCLSCRLFYRLWD  
LYKKVKRNSTPPLSLFGQLLWREFFFYTAATNNPRFDRMEGNPICIQIPWDRNPEALAKWAEKGTGFPWIDAIM

TQLRQEGWIHHLARHAVACFLTRGDLWVSWESGVRVFDLLELLDADFVSNAGSWMWLSCSAFFQQFFHCYCPVG  
FGRRTDPSGDYVRRYLPKLGFPSTRYIYEPWNAPEVQKAAKCIIGVDYPRPIVNHAEISRNLNIERMKQIYQQ  
LSRYRGLCLLASVPSCVEDLSHPVAEPSSSQAGSVSGAAPRPLPSGPASPKRKLEAAEPPGEELSKRARVAE  
VPTPELPSKAV

>Oryza\_sat\_bluelightP\_XP\_015630924.1

MAAAASDSDSPAAAAARHDDPTLPFAFASFSLSLRTPASPSPAALASVPSTIHLPTQISTLAVCLHPSASA  
SASPSSRRRLNAAAAASSLLAPLPASTPGLSRSPSPGAPAAAGRRRTLWFRADLRRLHDHEPLHAAVGASSSL  
LPVFVFDPRDFGKSPSGFDRTGPYRAGFLLDVADLRRLRARGGDLVVRVGRPEVVIPELARAAGAEAVFAH  
GEVSRDECRAEKVKSKAVEKEGIEVKYFWGSTLYHLDDLPRFLEDMPSNYGGFREAVKGLDVRKVLDAPEEVK  
CVPMPKNVLEPGEIPTLAELGLTAPPAMAHGSKAAVGSTLIGGEAEALERLKKFASECCMQPNKGDKDSTRDSI  
YGANFSCCKISPWLATGCLSPRFMYEELKKHASRAIPSGSTPKNGDGTSDAGTNWLMFELLWRDFFRFITKKYS  
SAQKTSEVAPATGCTPTPALA

>Oryza\_sativa\_BAC78798.1\_cryptochrome

MAAAEGIIQSFNADLLYEPWEVVDDEGQSFTMFAPFWNRCLSMFYDPAAPLLPCKRINSGDLSCPSDDLIF  
EDDSEEGSNALLARAWSPGWQNRDKALTAFLNGPLIHYSVNRKKADSASTSLLSPYLHFGELSVRKVFLHVRM  
KQLVWSNEGNAEESCTFLRSIGLREYSRYLSFNHPCSHEKPLLHLRFFFPWVINECYFKIWRQGRGTGYPL  
VDAGMRELWATGWLHDIRVWVSSFFVKVLQLPWRWGMKYFWDTLLDADLESALGWQYISGSLPDGRELDRI  
DNPQLEGYKFDPHGEYVRRWLPELARLPTEWIIHPWDAPASVLQAAGVELGSNYPLPIVGLDRANARLQEALS  
EMWQLEAASRAAMDNGMEEGLGDSSEVPPIEFPRELQMEVDREPARVTANVLTARTARRREDQMVPTMTSSLNRA  
ETEISADFMNSVDSRAEVPTRVNFEPRTEREENFRTTAGNVARTNGIHEHNNFQQPQHRMRNVLAPSVSEASS  
GWTGREGGVVPVWSPPAASDHSETFASDEADISSRSYLDRHPQSHRLMNWSQLSQSL

>Oryza\_sat\_XP\_015614933.1\_photolyase

MPPTSVSPPRTAPGPANPSPAHPSPRVRIHPGGGKPGGPVVYWMRLDQRLADNWALLHAAGLAAASASPLAVA  
FALFPRPFLLSARRRQLGFLRLRLRLAADAARHLFPFFLFTGGPAEIPALVRRLGASTLVADFSPLRPVREA  
LDAVVGDLRREAPGVAVHQVDAHNVVPVWTASAKMEYSAKTFRGKVSVMDEYLVFEFPELPAVVPWDREQPEG  
VDWDALIAVRCSEAENVPEIDWCEPGEEAAIEALLGSKDGFLLTKRIKSYETDRNDPTKPRALSGLSPYLHFGH  
ISAQRCALEAKKCRHLSPKSVDAFLEELVVRRELADNFCYYQPYQYDSLSGAWEWARKTMDHAADKREHIYTR  
EQLENAKTHDPLWNASQLEMVHHGKMHGFMRYWAKKILEWTSGPPEALSTAIYLNKYEIDGRDPSGYVGCM  
WSICGLHDQGWKERPVFGKIRYMNAGCKRKFDVDAYISYVKRLAGQSKKRNAEESPNPVVKLSKSQH

>Oryza\_sat\_XP\_015623929.1\_(6-4)\_DNA\_p

MDAAATAATATAAAAMVWFRKGLRVHDNPALDAARRGGAAARLYPVFVLDPYLRPDQAAPSPGSARAGVARV  
RFLLESLSLDLARLRRLGSRLLLLRRADDGDVAGTVCAALKDWNIGKLCFESDTEPYALARDKKVMDFAAASG  
IDVFSPVSHTLFDPAEIIIEKNGGRPPMTYQSFVAIAGEPPEPIMEEYSELPPVGDTEYELLVPVPRVEELGYG  
DISQEDLSLFRGGETEALKRMRESLHDKWVAKFEKPKGDPASFLKPATTVLSPYLKFGCLSSRYFYHICQDI  
YRSTKKHTNPPVSLTGQLLRDFFYTVAFGTPNFDQMKGNKICKQIPWTENEELFPWARDGRTGYPWIDAIMI  
QLRKWGMHHLARHSVACFLTRGDLFIHWEKGRDVFERLLIDSDWAINNGNWMWLSCSSFFYQYHRIYSPTSF  
GKKYDPNGNYIRHFIPVLKDMPEYIYEPWTAPLSIQKKANCIIGKDYPKPVVDHAIASKECKMMGEAYASN  
RLDDDKPDKGSSNSSRRKLSAGSQVTPNSSKTKQLKRSS

>Oryza\_sat\_XP\_015625483.1\_cry-1\_X1

MAGSERTVVWFRDLRIDNPAALASAARDGAVLPVFIWCPADEGQFYPGRCRWWLKQSLPHLSQSLESIGCP  
LVLIIRAESTLEALLRCIDSVGATRLVYNHLYDPVSLVRDDKIKKELSALGISIQSFNGDLLYEPWEIYDDSGL  
AFTTFNMYWEKCMELPIDASPSLAPWKLVVPVPGLESVRSCSVDDLGLESSKDEESSNALLMRAWSPGWRNAEK  
MLEEFVSHGLLEYSKHGMKVEGATTSLSPYLHFGEVSVRKVYQLVRMQQIKWENEGTSEAEESIHFMRSIG  
LREYSRYLCFNFPFTHKSLNLKHYPKVDEERFKSWRQGMTGYPLVDAGMRELWATGWTNRIRVLISSSF  
AVKFLIIPWTWGMKYFWDVLLDADLESILGWQYISGSLPDGHELSRLDNPEVQGGQYDPDGVYVRTWIPELA  
RMPTEWIIHPWDAPSCILEVAGVELGFNYPKPIVDLHIARECLDDSI STMWQLDTAEKLAELDGEVVEDNLSN  
IKTFDIPKVVLRETSPCALPIDQVRPHASSKDHNLKSKVLKASNRSSICVDMIRSSKMEATSSVANSPVSRKR  
SFCETAHFVPSYSSSAEVHSHIQDHGGSVLGSPRYLLQEAGRNYVDEVEDSSSTADSGSSISRQRKAA

>Oryza\_sat\_XP\_015644118.1\_cry\_DASH,\_

MLHFLSSSSPLNPQFLLLPQ SARLRVLLSIPVSAMSSSSSSSSRGALAAAAPVSLSADEAGAAADEAFLRYT  
SPSMRRSGGGGVAIVWFRNDLRVLDNEAVVRAWAASDAVLPVYCVDPRISAGSTHYFGFPKTGALRAQFLIEC  
LEDLKRNLTKQGLDLLIRHGKPEDILPSIAKAVTAHTVYAHKETCSEELLVEHLVRKGLEQVVI PQGGASNQK  
KPRNPKLQLIWGATLYHVDDLFPVSVNNLPDVYQFRKAVESKSSVRNCSKLPPLSGPPGSGGLDEIGGWGTVP  
TLESGLSMTKAEKGMHFVGGESAALGRVHEYFWKKDQLKVYKETRNGMLGPDYSTKFSPLASGSLSPRYIC  
EEVKRYEKQRIANDSTYWVLFELIWRDYFRFISAKYGNISIFHLGGPRNVESKWSQDQALFESWRDGRGTGYPLI  
DANMKELLATGFMSNRGRQIVCSFLVRDMGIDWRMGAEWFETCLLDYDPASNYGNWTYGAGVGNDPREDRYFS  
IPKQAKTYDPDGEYVAYWLPELRSIAKERNFPGASYIKQVVPLKFDGGHQKRDQQFNRQRRPGHMYRRQK

>Oryzias\_latipes\_XP\_004070204.1\_cryptochro

MVVNSVHWFRKGLRLHDNPALQEAALNGADTVRCVYILDWPWFAGAANVGINRWRFLLEALEDLDCSLKKLNSRL  
FVVRGQPTDVFPRLFKEWNVTRLTFEYDPEPYGKERDGAI IKMAQEFGVETVVRNSHTLYNLDRILNNSP

PLTFKRFQTIVSRLELPRRPLPAITQQQMDSCQRQIGDNHDQLYSIPSLLEELGFRTERLPPAVWRGGESEALD  
RLSKHLDDKKVWVASVEHTRVNKCSLYASPTGLSPYLRFGCLSCRVLYYNLRELYMKLRKRCSPPPLSLFGQLLW  
REFFYTAATNNPNFDRMEGNPICVQIPWDQNPEALAKWAEGRGTGFPPWIDAIMTQLRQEGWIHHLARHAVACFL  
TRGDLWISWVSGMKVFEELLLDAGWSVNAGSWMWLSCSAFFQQFFHCYCPVGFGRRTDPSGDYIRRYIPILKD  
FPNRYIYEPWNAPEVQKAANCVVGVDPKPKMVNHAESSRLNIERMKQVYQQLSHYRGLSLLASVPTIQEEAE  
PPMTDESQASSGPDSPHRDPADDEAAGSSTFPDSSTSAAPQDKEDSAHCYHAHQVSAHSPTSSDSSAHGPHD  
RSKPSSPSSSCHTMSPPSPSTQTSPRRSSSSRKERRSQRQKARHVCSSSVRDNQREVEEERMEEEMEDSEER  
MEEEAAGQQQ

>Oryzias\_latipes\_XP\_004081133.1

MASSRIVICLLRNDLRLHDNELFFWAQKNADHIVPLYCFDPRHYVGTYNFNFPKTGPFRLRFLLDsvrdLrnt  
LLSKGSNLVVRGKPEEVVADLIKQLGSVSSVAFHEEVASEELNVEKKVKEVCAQMEVKVHTCWGSTLFHRDD  
LPFFPHMARLPDVYTEFRKAVESKSRVRPVFPTPDRLNSLPPGLEGGAIPTAEDLEQTEPETDPRSAFPCSGGE  
SQALARLKHIFYWDTDAVATYKETRNGLIGVDYSTKFSPLAMGCISPRYIYHQIKKYEQERTANQSTYWVIFE  
LLWRDYFKFVGKYGKMKFFIKGLQDKSLPWKRDTKLFDAWKEGRTGVPFVDANMRELAMTGFMSNRGRQNV  
SFLTKDLGLDWRMGAEWFEYLLIDHDVCSNYGNWLYSAGIGNDPRENKFNMIKQALDYDSNGDYVRQWIPEL  
TAVRGGDVHTPWNLSAALSRAVSLGETYPTPIVTAPEWGRHFNKKPSGPGPSQKGKKGPSHTPKQHRDRGI  
DFYFSKSKNL

>Oryzias\_latipes\_XP\_011474490.1

MPPSKSDQALVSEMLKEVLAGEDEGFFAICLSVLGHRETYSVFQTLIKPLSTANTSVHSTLTLIYEEYFSK  
TEDDDLELALALSLMEMEDQQPSTQHMQAEVRTNQSGPFQLNSASMSLEKSSIKPEDQVGRENDPVAKSGLKS  
KESPENSERDIAPQRGTHENQAQTKQDAFKEPQNLAKDQTLNQPEEPKRSKSRKRKGAASLVGLPGSPSAS  
PPVLLWFRDLRLCDNPALNAALEMDAPVIPIFIWSPEEEEGPGVTVAAGGASKYWLHQALACICTSLNHIGS  
RLTFLKADGEEKCSLPTLKQLVKETGAKTLLANALYEPWLKERDDMVESTLQKEGVQCRIFPSYCLRDPYSVS  
TVGVGLRGIGSVSHFMSCKQNPGSAGVPLDPPQSLPTPSCWPQGVPLEALGLARMPRRKDGTIDWAANIR  
KSWDFSEDGAHARLDNFLRDGVYRYEKESGRADAPNTSSLSPYLHFGQLSPRWLLWDAKGARCRSPKFQRKLA  
WRDLAYWQLTLFPDLPWESIRPPYKALRWNTDRSHLKAQWQRGKTGYPLVDAAMRQLWLTGWMNNYMRHVVASF  
LIAYLHLPWQEGYRWFQDTLVDADVAIDAMMWQNGGMCGLDHNWFVMHPVDAALTCDPYGHYVRKWCPELADL  
PDELIHKPWKCPASMLRRAKVVFGETFPERIVVDLEERRNQSLQDVASVRKEFGQFVDKRSGLDVLPLPRLV  
AEALGLSQRDGAVGKQFLLPVITRMEFKYQDDPDAAASNPNYAVLKGYSRKRDETIAFLNQRDFTASVMHEG  
TQRLERLERDYRMEGLPPPPSTQGRARRTPTAKDRFSIVPGGAVTS

>Oryzias\_lat\_NP\_001098271.1\_CPD\_photol

MSDKKKRKATATAGDAEPSAKQPREDKPTKAAGWLHSLIRQQREDKKDMKFSKKRQRFISETQKVRQSGGGVL  
YWMLRDQRVQDNWALIRAQQLAAKESLPLHVCFCFLVVPKSELSTLRHYSFLLKGLEEVQKECKHLNIQFHLH  
GAAGDVLPGFVTGHNFGAVVTDFSPLREPLQWLEAVKKGLPEDIPFIQVDAHNIVPCWVASPKLEYSARTIRG  
KITNLLSEFLTDFPLVDKHPFSATKTAKAVDWDKTLASLKVDRTVGEPKLAKPGTEAGLAMLESFIDVRLKLF  
GTQRNDPNAAALSQLSPLWLRFGQLSAQRVALQVRKNSSPSVPAFIEELVVRRELTDNFCFYKNKNDYSVTGAYE  
WAQKTLKDHAKDKREYLYTREQFEKAQTHDKLWNAQIQMVTEGKMHGFLRMYWAKKILEWSTSPEEALSIAL  
YLNDRYELDGQDPNGFVGCMWSICGIHDQGAERAVFGKIRFMNYKGCLRKFNVAQFERKYCSKKV

>Oryzias\_lat\_XP\_004067451.1\_cry-1

MAHVCIHWFRLRLHDNPALMAALRDCKELYPLFILDPLYDQNLAGINRLRFLISSLQDLDCSLRKLNSRL  
FVVRGKPEEVLPLKLFTKWNVTKLTYEYDTEPYRSRSDKNVTMLAEEQRIQVIYKISHTLYDIDRIIEENNGKP  
PLTYNRLRDIVKALGSPKKPIPAPTVEDMKNIAPFSEKHKPEYGIPSLLEELGLDTSSEAEIIFPGGEQALRR  
LDTYMQRPGWVCSFEKPNTSPNSLSPSTTVLSPYVTFGCLSAFTFWRLAEVYQGGKHSDPPVSLHGLLWRE  
FFYTASVGIPNFNKMGTGNPACTQVDWDENQEYLAAWREARTGFPFIDAIMTQLRQEGWIHHLARHAVACFLTR  
GDLWISWEEGQKVFEKLLLDGDWALNAGNWQWLSASTFFHQFFRVYSPVAFGKKTDKNGDYIKKYLPIPKKFP  
PQYIYEPWKAPRSQQAAAGCIVGKDYPKPIIEHEVVISKKNIQRMKQAYARRTSGSTESPTKKQGVKRKAPT  
VVDLIQKKQKRS

>Oryzias\_lat\_XP\_004069915.1\_cry-1a

MTVNTVHWFRLRLHDNPALRDSIRGSDTLRCIYILDPWFAGSSNVGINRWRFLHLCLEDLDASLRKLNSRL  
FVIRGQPTDVFPRLFKEWQITRLSYEYDSEPFQKERDAAIQKLASEAAVEVVVRISHTLYDLDRIDIELNGGPP  
PLTYKRFQALINRMDAYERPRMNANSLATPTGLSPYLRFGCLSCRIFYFKLTDLYKKVKKNSSPPLSLYGQLLW  
REFFYTTATNNPNCFDKMEGNPVCVQIPWDRNPEALAKWAEGRGTGFADWIDAIMTQLRQEGWIHHLARHAVACFL  
TRGDLWISWEEGVKVFEEELLDADWSVNAGSWMWLSCSFFQQFFHCYCPVGFGRRTDPNGDYIRRYLPVLRG  
FPAKYIYDPWNAPEEVQKAARCIIGVHYPKPMVHHAESRINIERMKQIYQQLSCYRGLGLLASIPTNPSSDA  
DEGQRGSSEVPEGASRSGGGPSTQKRRHEDAPSASSSRSLKQSKLGGSCSR

>Oryzias\_mela\_KAF6716703.1

MATSRTVICLLRNDLRLHDNELFFWAQKNADHIVPLYCFDPRHYVGTYNFNFPKTGPFRLRFLLESVRDLRNT  
LRSKGSNLVVRGKPEEVVADLIKQLGSVSSVAFHEEVASEELNVEKKVKEVCARMKVKVHTCWGSTLFHRDD  
LPFFPHMSRLPDVYTEFRKAVESQSRVRPVFPTPDRLNPLPPGLEDGVIPTAEDLEQTEAETDPRSAFPCSGGE

NQALARLKH YFWDTDAVATYKETRNG LIGVDYSTKFS PWLAMGCISPRYIYHQIKKYEQERTANQSTYWVIFE  
LLWRDYFKFVG VKYGNKMFFVKGLQDKSLPWKRDRKLFDAWKEGRTGVPFVDANMRELAMTGFMSNRGRQNV  
SFLTKDLGLDWRMGAEWFEYLLIDHDVCSNYGNWLYSAGIGNDPREN RKFNMIKQALDYDSNGDYVRQWIP  
EL AAVRGADVHTPWNLSASLSHAHVS LGETYPTPIVIAPEWGRHFNKKPSGPGPSRKGGKGPSHTPKQHRDRGI  
DFYFNKSKNL

>Oryzias\_mela\_\_KAF6720364.1

MRLVGAAISFEVLCFPCRKGDKLSKRRTFLVQLFSLVSRPSSTLLYPRKSANMSAKKRKATSAAGEAEPSTKQ  
PRQENPKKEAGWLHGLIKQ QREDKKDMKFNKKRERF ISETQKIRQSGGGVLYWMQRDQRVQDNWALIRAQQLA  
TKESLPLHVCFLVVPKSELSTLRHYSFLLKGLEEEVEKECKHLNIQFHLLRGAAGDVLPDFVTGHNFGAVVTD  
FSPLREP VQWLEAVKKGLPEDIPFIQVDAHNIVPCWVASPKLEYSARTIRGKITNLLPEFLTAFPLVDKHSFS  
AAKSAKAVDWDKTLASLQVDR TVGEPKWAKPGTEAGLAMLESFIDVRLKLFGEQRNDPNAAALSQ LSPWLRFG  
QLSAQRVALQVRKNPSPSPVPAFIEELVVRRELTDNFCFYNENYDNVKGAYEWAQKTLKD HAKDKREYLYTREQ  
FEKAQTHDKLWNAAQNMVTEGKMHGFLRM YWAKKILEWTTSP EEALSIALYLNDRYELDGQDPNGFV GCMWS  
ICGIHDQGWAERP VFGKIRFMNYKGCLRKFNVAQFERKYCSKKV

>Oryzias\_mela\_\_KAF6735023.1

MPPSKDDHALVREMLKEVLTGREDPEGFFAICLSVLGHRETYSMFPTLIKPLSTANISVHSTLT LIYEEYFSK  
TGDDDLELALALSLMEMEDQQLSTQH LQSEVRTNQSDQFRLNSASGFTNKDTKTKHNDPQNNNKAQTKQYAVK  
ESTNLMEDQTSNQSEKPKSAKSRRKRRKGT VSIIGLPGSPSASP PVLLWFRRDLRLCDN PALNAALEM GAPVI  
PVFIWSP EEEEEPGVTVAAAGGASKYWLHQALACCTSLNRIGSRLTFLEAEEQSSRLTLKQLVKETGARTLLA  
NALYEPWLKERDDAGIGSVSHFTSCCKQNP GPAIGVPLDPPQSLPTPACWPQGVPLEALGLARMPRRKDG TII  
DWAANIRTSWDFSEDAHARLDAFLRDGVYRYEKESGRADAPNTSSLSPYLHFGQLSPRWLLWDAKGARCRSP  
KFQORKLAWRDLAYWQLTLFPDLPWESIRPPYKALRWNTDRRHLKAWQRGKTGYPLVDAAMRQLWLTGWMN NYT  
RHVVASFLIAYLHLPWQEGYRWFQDTLVDADVAIDAMMWQNGGMCGLDHWNFVMHPVDAALTCDPYGHYVRKW  
CP ELADLPDELIHKPWKCPASMLRRAKIVFGETYPERIVVDLEERNQSLQDVASVRKEFGQFVDKRSGCDLV  
PLPPRLVSEALGWSKR DGEAAKEGKQFLLPVITRMEFKYQRDDPDADAASN PYNALVKGYSRKRDETI AFLN  
QQDFTASVMYEGAQRRELERDYRRMEGLPPPSARGRARRTP TAKDRFSIVPGGVVTS

>Oryzias\_mela\_\_XP\_024136765.1

MVVNSVHWF RKGLRLHDNPALQEALNGADTVRCVYILDPWFAGAANVGINRWRFLLEALEDLDCSLKKLNSRL  
FVVRGQPT EVFPRLFKEWNVTRLTFEYDPEPYGKERDGA I KMAQEFGVETVVRNSHTLYNL DRIEMNNNSP  
PLTFKRQFQTIVSRLELPRRPLPAITQQQMES CQRKIGDNHDQLYSIPSLEELGFRTERLPPAVWRGGESEALD  
RLSKHLDKKVWVASVEHTRVNKCSLYASPTGLSPYLRFGCLSCRVLYYNLRELYMKLRKRCSPPLSLFGQLLW  
REFFYTATNNPNFDRMEGNPICVQIPWDQNPEALAKWAEGR TGFPWIDAIMTQLRQEGWIHHLARHAVACFL  
TRGDLWISWVSGMKVFEELLLDADWSVNAGSMMWLSCSAFFQQFFHCYCPVGFGRRTPSGDYIRRYIPI LKD  
FPNRYIYEPWNAPE SVQKAANCVVGVDPKPMVNHAESSRLNIERMKQVYQQLSHYRGLSLLASVPTIQEEAE  
PPMTDESQTSSGPDSPHRDPADDEAAGSSTVPDSSTSAPPQDKEDPAHCCHSHQVSAHSPCTSTGSPAPLSCH  
SPHDRSKPSSPSSSCHTMSPPSPSTQTSPRRSSSSSRKERRSQRQKARHACSSSARENKREVEEERMEEEVED  
SEERMEEAAEQ LQ

>Oryzias\_mela\_\_XP\_024137113.1

MVVNTVHWF RKGLRLHDNPALTD SIRGSDTLRCIYILDPWFAGSSNVGINRWRFL LHCLDLDASLRKLNSRL  
FVIRGQPTDVF PRLFKEWQITRLSYEYDSEFPFGKERDAAIQKLASEAAVEVMVRISHTLYDL DRIELNSGQP  
PLTYKRQFQALINRMDA VELPAERITSEVMQTCVTPVSENHDDKFGVPSLEELGFETEG LPTAVWPGGETEALL  
RLERHLERKAWVANFERPRMNANSL LATPTGLSPYLRFGCLSCRFLYFKLTDLYRKVKKNSSPPLSLY GQLLW  
REFFYTATNNPCFDKMDGNPMCVQIPWDRNPEALAKWAEGR TGFSWIDAIMTQLRQEGWIHHLARHAVACFL  
TRGDLWISWEEGVK VFEELLLDADWSVNAGSMMWLSCSSFFQQFFHCYCPVGFGRRTPNGDYIRRYLPVLRG  
FPAKYIYDPWNAPEEVQKAAKCIIGVDY PKPMVNHAESRINIERMKQIYQQLSCYRGLGLLASVPANGGGGT  
NTSEAPRGSAEDRDEGAPP SEREAATQKRHEEAPSAGSSRSWKQSKLGS R

>Oryzias\_mela\_\_XP\_024150891.1

MRCAYMAHVC IHWFRKGLRLHDNPALIAALRDCKELYPLFILD PYLHDNSRVGINRWRFLISSLQDL DSSLRK  
LNSRLFVVKGP EEVLPKLFTKWNVTKLTYEYDTEPYSLSRDKNVTTLAEERGIQVIYKISHTLYDIDRIIVE  
NNGKPPLTYNRLR DIVRALGSPKKPIPAP TLEDMKNVASFSEKHKQEYGI PSLEELGLDTS SSTEIIFPGGEQ  
EALRRLDKYMQR TGWVCSFEKPNTSPNSLSPSTTVLSPYVTFGCLSARTFWWR LAEVYQGRKHS DPPVSLHGQ  
LLWREFFYTASVGIPNFNKMQGN SVCTQVDWDENQEYLA AWREARTGFPFIDAIMTQLRQEGWIHHLARHAVA  
CFLTRGDLWISWEEGQKVFEELLLDGDWALNAGNWQWLSASTFFHQFFRVYSPVAFGKKT DKNGDYIKKYLPI  
LKKFPPQYIYEPWKAPRSVQQAAGCIVGKDYPKPIVEHEVISKKNIQRMKQAYARRSSASSE SPTKKQGLKRR  
APTVDLMQKKQKKS

>Ostreococcus\_tau\_OUS42345.1\_cry\_DASH,

MGRTRVVIWFRNDLRLLDNACVARAATLASESSDVEVVPVYVFDETYFKPSKRGLARFGAGRGKFTLECVGDL  
KTS LRALGSDLLVRCGKSRDVIAELT LTGANDRTII LTQTEVTSEETEMDVAVERATRERARGGAASATMERH  
WGSTLYHIDDVPFDVTSGLSDLPDVFTPFRNKVESKCKVRDVI PAPTANALGHVPASVEGF EWMPDPSDL PFA  
SSEIAMDCDKRIKDCLDERSVLD FKGGESNALARVKYYLWESDRLATYFETRNGMLGGDYSTKLAPWLALGCV

SPRHVVSEIRRYESERVENKSTYWVIFELIWRDFFKFFALKHGNKIFHLDGTAGRRASWKRDEKILKAWKTGT  
TGYPILIDANMRELAATGFMSNRGRQNVASWLALDAGIDWRHGADWFEHLLDYDTASNWGNWCAAAGMTGGRI  
NRFNIAKQTKDYDPAGEYIKTWVKELAEVPAAYIADPNQAPRELDRIGLNPKNLALPRRDFTEMGSPPGPR  
RGGGGGGRGRGRPGGSTPNRGTKARVASVYDTVYG

>Ostreococcus\_tau\_OUS44591.1

MPWRKDKNAFDAWTKGQTGYPMVDAGMRQLWQGTGWMHNRVRMIVASFLTKHLLLWPQDGEAWFWDTLVDADPA  
NNAASWQWTAGSGADAAPYFRVFNPISQGSKFDETDGYVRRFCPELKDLDPKYLHAPWEASEEILNKAGIQLG  
KTYPKPIVDHSGARQRALDAYDTLKEKRDA

>Ostreococcus\_tau\_OUS49163.1\_FAD\_bindin

MTLTGASALIARAGRARAARTARDRRRALATRRVSQKVQNDVGVPSASSSDPDVRGAVWLARSHDLRMRDNE  
AFISACAEARAVGGVVACVFAWSERDARESGGARAWLAKALEALDRDLRRTYGGGVSMFKGEGAEGAMRAAR  
AIRATRVFASKRYEPENAEADERASVEMAVRGVELVRTRGFLLFEPSEVRIDVAARDGYFGTLMFPVHAAERT  
CGDPGKPKPAPVDVRMVDLGTESDHEWEQIGLEDLGVAPASDRRVDWSVGIRADWDISEGGAVETWSQFTAVG  
LDRFEAEHGRADPEAGVTVSRLSPYLRFGMISPRTVYHDLVKKDGKNISKTFWHRLYRRELAYWQLHHWPDLP  
KTSVRSHYENRAWLSGDEADEALRRWQRGETGFPVVD CGMRLWRTGWMHQTERMITATFLVDYLGVHWTRGA  
DWMFRTLVDADAENSMWQNAKSGLDQWDFFEGLTAPDGSARAHDPHGDAIARWIPELAALPRGYLRHRPW  
EASKATLAECDVELGSTYPRRMIVDLDRARQRMDDVTTIRHAELVRAGGLVKPGSMEDLVVAPRAAVVRGAA  
DLARVSTRKEFKRSLKALKASIAGIDLPSNPSSKPHGKSRANASRPKVSAASRPKSGPRSGRPPAPDRDAVRA  
SRREAKRLDAAFRGRVFHHLPVDDLDDPDAAAPRVGRPAR

>Ostreococcus\_tau\_XP\_003078467.2\_DNA\_photol

MAPACSKKRVRALTSNTEPMASATAPVWMSRDQRVDDNWALLRACDLARERGAPVVI AFNLLTKYLGAGAR  
QFGFMLRGLRELEAKARAAKATFAMTYGDEPAAIDALAKKIGAKTIVCDFSPLRDGVWRKDLAVLSEKRG  
HVEECDAHNVVPCWEASDKLEV GARTLRGLAKRYPEFLKEFPAIPDDLVEYDGPDAIDAVKWDDLAEALKRG  
EAVPEVTWAI PGETAARAVLDDFVANRMKLYEKRNDPSKPRALSGLSPLWHFGQISAQRCALEAKKAVGKASP  
AAYDSFFEELVVRRELADNFCYYCPGQKYDEMEGQKYDWAKDTLRAHAGDKRPYIYTLEQLERAQTHDDLWNA  
AQRELRYGGKMHGFCRMYWAKKILEWTESPEQALKWSIYLN DTYSLDGRDPSGYVGCMWSIVGVHDQGWKERE  
VFGKIRY MAYDSTKKKFNIPDYIARVNALVKAAKSDFKTGEKSSAANPGLFSIDVSGVKKADAMA

>Ostreococcus\_tau\_XP\_022838904.1\_DNA\_photol

MSVASTSAAAKGRTL VWRKALRVHDNPALS RGT LHATACQPVFVLDPWFCQPSRVGANRMRFLQLSLRD L DA  
QLRARGSSLLVLHGEP RVVLPRACKKWRVDSVTWEHDIEPYAKIRDAAVRGALERAGVECHAASGHTLYDVDE  
MLEKCKGAPPTTYQGFFKIVDKMGAPNAPIDAMEKMPGSFASSDEETKALVQGVADAYGIPTLEDLGYEPLGD  
DEGFPVGGETEGLRRLRLMLARKEWIGQFEKPSTNPTTRFHGLS QSGKTKPKSPFEIAAGRSKDGDASTSGA  
EALMIPSTTALSPYMKFGCVSPRVFYHELTAVYKELEGKHSKPPTSLMGQLMWREFYYLVAAGTKNFDKMEGN  
AICRQIPWKKDRELFAAWENAQTGF PWIDAAMTQLRREGWLHHLARHAVACFLTRGDLFIHWEWGRDAFDRDL  
VDADWALNNGNWMWLSCSAFFYQYFRVYSPIAF AKKYDKDGQYVRHYLPVLKNMPSKYVYEPWLAPLDVQKKA  
GCVVGVDYPAPIVDHSAASKRCVDDIATAYAAHKDANAVAGKKRKASD

>Otolemur\_garn\_XP\_003781307.1

MWVGRGAPTGRSSGGLAVREAMAAVATTA AQGPATSADGASSVHWFRKGLRLHDNPALLAAVRGARCVR CVY  
ILDPWF AASSSVGINRWRFLQLQSL EDLDTSLRKLNSRLFVVRGQPADVF PRLFKEWGVTRLTTFEYDSEFP GKE  
RDAAIMKMAKEAGVEVV TENSHTLYDLDR I IELNGQKPLTYKRFQAIISRMELPKKPVGSVTSQQMES CRAE  
IQENHDETYGVPSLEELGFPT EGLGPAVWQGGETEALARLDKHLERKAWVANYERPRMNANSL LASPTGLSPY  
LRFGCLSCRLFYRYRLWDLYKKVKRNSTPPLSLFGQLLWREFFYTAATNNPRFDRMEGNPICIQIPWDRNPEAL  
AKWAEGKTGF PWIDAIMTQLRQEGWIHHLARHAVACFLTRGDLWVSWESGVRVFD ELLLDADFSVNSGSWMWL  
SCSAFFQQFFHCYCPVGFGRRTPSGDYIRRYLPKLKGFP SRYIYEPWNAPESI QKAAKCIIGVDYPRPIVNH  
AETSRLNIERMKQIYQQLSRYRGLCLLASVPSCMEDLSHPVAEPCSSQAGSINNTGPRPLLSGSASPKRKLEA  
AEPPGEELSKRARVTELPTPELPSKDA

>Otolemur\_garn\_XP\_003783322.1

MGVNAVHWFRKGLRLHDNPALKECIQGADTIRCVYI LDPWFAGSSNVGINRWRFLQLQCLEDL DANLRKLNSRL  
FVIRGQPADVF PRLFKEWNI TRLSIEYDSEFP GKERDAAIKKLATEAGVEVIVRISHTLYDLDKI IELNGGQP  
PLTYKRFQTLISKMEPLEIPVETITSEIIEKCTT PLFDDHDEKYGVPSLEELGFDTDGLPSAVWPGGETEALT  
RLERHLERKAWVANFRDKMEGNPICVQIPWDKNPEALAKWAEGR TGFPWIDAIMTQLRQEGWIHHLARHAVACFL  
TRGDLWISWEEGMKVFEELLLDADWSINAGSWMWLSCSSFFQQFFHCYCPASFGRRTDPNGDYIRRYLPVLRG  
FPAKYIYDPWNAPEGIQKVAKCLIGINYPKPMVNHAESRLNIERMKQIYQQLSRYRGLGLLASVPSNPNGNG  
SFMEYSPPENIPGCSSSGNCSQSGSILHYAPGDGQQPHLLKQGRSSMGTGLSGGKRPSQEEDMQSVGPKVQRQ  
STN

>Owenia\_fusi\_CAC9497535.1

METKTKKPKNVLHWFRKGLRLHDNP SLMDSLKDADTFRCVYIIDPW FAGYSQVGINKWRFLQLQCLEDL DLGLR  
NLNSRLFVVRGQPADVF PKLFREWNIT TLSFEQDPEPYGRERDCAICLMAREAMVEVIIRISHTLYDLNTIMH  
RNNGCPPLTYKKFQKILETIKPPEYPIEAVTLKHVAGATTPIGADHEDKFSVPTLEELGFDT ELLYPLVWRGG

EQEALRRLDRHLERKAWVASFEKPKMAPQSLLATQTGLTPYLRFGCLSARQFYWKLTELYRKVKKRQDPPLSL  
HGQLLWREFFYTIATQNPYFDRMVGNPICVQIPWDRNPEAFKWAEGKTGFPPWIDAIMCQLRQEGWIHHLARH  
AVACFLTTRGDLWLSWEDGMKVFDLLELLDADWSVNAGMWMWLSCSSFFQQFFHCYCPVNFGRADPNGDYIKRY  
LPILRGYSAQYIYEPWTAPMQVQKAACIVGQDYPLPMVNVHVSSTINLKRMKQVYQQVITYKANCSTATSQDT  
VQVQFMKKRAQMLQQKDIYNEHPDPRaelPRGSTSNKQTYQPV

>Owenia\_fusi\_\_CAC9499959.1

MGRGQSGDDSIKPGCSILWFRHGLRLHDNPALQEAIKDCEKLYPVFIFDGQVAGTSTSGYNRTRFLLECLEL  
LDRQFKDAGGRLYVLYGKPVDFREIHQEWGVTKICFEQDPEPIWQNRDALVRDFCKSAGIECVEKIGHTLWN  
PKDIISENGGMPPLTYEKFNAITSLIGPPPRPTERHSFISVKLPVEPDHDERHSIPSLKLGKEPELPEQLMR  
INQWKGGESEARKLFFKIRMRDEEEAFKKGFMMPNQFKPNMAAPPTSMAAHLRFGCISVREMYWAIHDTFEKVR  
KEDSPTQLTGQLVWREFFYTMSVGNKDYDKMAPNPICLDIPWYENKEHLKLWEQGQTGFPPIDACQRQMLQEG  
WVHHVGRHATSCFLTTRGDLWISWEEGLKVYLKYMMLDADWSVCAGNWMWVSSSAFEKVLQCPSCLDPVKYGMRM  
DSKGEFVRRYVPELRDMPLRYLFSPLWLSPLNIQKKANCIIGTDYPKPMVNHKEVAACKNADMMMLKVQAHENKV  
TSICAPSNSDEVRKFMWLPTSQEKGLPSCATDDFCVENL

>Owenia\_fusi\_\_CAC9618788.1

MSHNTIHWFRKGLRLHDNLALLEGIRNSAEWRAVFVLDPPWFVQNAKVGPNRWRFLMQCLEDLNNSLNKLGSRL  
FVIRGNPNNEVFPKLFKKWEITQLTFEVDTEPYAKQORDQITIDLAKKHQIDVLQRVSHLTLYDTKQIIKKNNGSA  
PGTYQRCLTVMSQLGAPPQPEPTLSKDDIKGCKLCMDACGFTADIPTLEELNVKENDLETCLYVGGESEALKR  
LDKYMTRQQWVCNFEKPKTEPNSINPSTTVLSPYLKFGCLSARTFYHRLNEIYRHNKKHSGPPVSLEGQLYWR  
EFFTTVGSPTPNFDMVGNPICRQIPWDDNTQFLEAWKHGKTGYPFIDAIMVQLRREGWIHHLARHAVACFLT  
RGDLWISWEEGQKVFEELLLDADWSLNAGNWMWLSASAFFHQYFRVYSPVAFGKKTDKNGDFIRKYLPLVQNF  
PAQYIYEPWKAPLKVQEKFKCIIGKDYPKPIVDHVDVVRQLNIKKMAAAYAKNKEAKEESPKKKKQKVK

>Owenia\_fusi\_\_CAC9662513.1

MISTVHRSYQSVQILRNLCCHLKVFRKMSETDESPTKKMKLQEGEPDDFIERIQYQRTTKTSSVADFKFNKK  
RVRMISSAENLDETSSGVVYWSRDQVRQDNWALLYSQRLALKQKVPLYVCFCLVPKFLEATIRQFGFMLKGL  
QQVEKDCKELISIFHLLIGYAKDVLPPQFIEENNIGAMVTDFSPLRVPSQWVKDVSEQLGKTFFCQVDAHNVP  
CWEASPKLEYGARTIRSKINNQLSTYLTEFPPIKHPHTAKNIQKPIDWSAAEASLEVDKRVTEVEWAEPTA  
AGLRTLESFIKKRLKYFDVDRNDPTKNALSNLSPWIFHGQISAQRCVLEVKKFRSRYGKSVEGYIEECVVRRE  
LSDNFCYYNEKYDTIEGTNDWAKTSLELHKKDKREYVYSREQLTAKTHDPLWNAAQRMVGEKGMMHGFRLMY  
WAKKILEWTASPEIALSDAIYLNKYSLDGRDPNGYVGCWWSICGIHDQGWKEREVFGKIRYMNYAGCKRKFN  
VAAFEAKYNKKKM

>Owenia\_fusi\_\_CAC9667714.1

MYPLPGRKRSPKKKQMLKMLLKHFEYLLKHFGVLRYTIKMIYHLKQLTVFLILLPLPSGLDPQQLPMTSDLGV  
QEIAPDKRSAPFPSSGGETSALDRNLKYLWETDSVAVYKETRDGMVGSYSTKFTSTWLANGCLSPRQIYWELKK  
YESKRTSNQSTHSVVFELLWRDYFKYVGLKHGDKLFNLDGIMGKQIEWKQDQKLFEAWKEGRTGVPYVDANMR  
EMAATGYMSNRGRQNVASFLTNDLKLDRMGAEWFESMLIDHDVCSNYGNWQYSAGIGNDPSQDRKFNVVKQG  
LDYDPQGEYVRLWVPELENIKTGDVHTPWALSTGQLADANLELGTTYPNPVVAPEWSTQ

>Pandion\_hali\_\_NXS67412.1

CIYILDPWFAASSAVGINRWRFLQLSLEDLDNSLRKLNSRLFVVRGQPTDVFPRLFKEWGVTRLTFFEYDSEPF  
GKERDAAIVKLAKAEAGVEVVIENSHTLYDLDRILNGLHKPPLTYKRQAIISRMELPKKPVSTVISQOMETC  
KVDIQENHDDVYGVPVPSLEELGFPTDGLAPAVWQGGETEALARLDKHLERKAWVANYERPRMNANSLASPTGL  
SPYLRFGCLSCRLFYYRLWELYYKKVKNSTPPLSLYQQLWREFFYTAATNNPKFDRMEGNPICIQIPWDRNP  
EALAKWAEGKTGFPPWIDAIMTQLRQEGWIHHLARHAVACFLTTRGDLWISWESGVRVFDLLELLDADFSVNAGSW  
MWLSCSAFFQQFFHCYCPVGFGRRTDPSGDYVKRYLPKLKGFPSRYIYEPWNAPESVQKAACIIIGVDYPKPM  
VNHAETSRLNIERMKQIYQQLSRYRGLCLLASVPSCVEDLSGPVTDASGQGCSTNTATRLSQAEQASPKRKH  
EGAEELCTEELYKRAKVTGLPTPEIPGKSL

>Pandion\_hali\_\_NXS68492.1

LAQLLPFSSSVLKVDYDVCSNYGNWLYSAGIGNDPRENKRKFNMIKQGLDYDGNGDYVRLWVPELQGIKGADIH  
TPWALNSAALSQAGVTGETYPQPVVTAPEWSRHINQRPHGRKPHPRGRRGAHTPMQHKDRGIDFYFSHKKD  
V

>Pandion\_hali\_\_NXS72903.1

DNWAFLYAQRLALKQELPLHVCFLVPKFLDATIRHYGFMLRGLQEVAKERECLNVPFHLLLGAKDVLPPFV  
VEHVGGLVTDFCPLRLPRQWVEDVRERLPEDVPFVQVDAHNIVPCWVASPKQEYSARTIRGKIHAQLPEFLT  
EFFPIIRHPYPPSCPAEPIAWEACYSSLQVDRTVKEVEWATPGTAAGLAVLQSFIAERLKSFGSHRNDPNKAA  
LSNLSPWFHFGQVSTQRAILEVQKHGKYKESVDADFVEEAVVRRELAENFCYYNENYDSVQGAYDWAQTTLKL  
HAKDKRPFLYELQELEQGTTHDPLWNAAQLMVREGKMMHGFRLMYWAKKILEWTHSPEEALRFAIYLNDRYEL  
DGRDPNGYVGKLQEGGIEQGALSMAKATVGCLWSICGIHDQGWAERAIFGKIRYMNYAGCKRKFVDVGQFERR  
YTPDT

>Pandion\_hali\_\_NXS73800.1

MQHSSSIHWFRKGLRLHDNPALLAAATDCHRLHPLFILDPSGRAGTNAWRFLLDALQDLGSLREMGSRFLVVR  
RGCPEEVFPCLFHAWGTTRLTFEVDTEPSARRRDAVAELAEQHGVEVIREVSHTLYDTERVLALNDGKAPLT  
YKHLQSLLASLGPPEKPAPALTLEHLQGCHTACQVSHDAEYGVPTLEELGQDPTKAGPHLYPGGETAALTRLD  
ALMDRTAWVCSFKKPEPETEPTSLSPSTTVLSPYLRFGLSVRTFWWRDLKVYQGGREHSQPPVSLHGQLLWREF  
FYTAGAGIPNFDRMVGNPVCLQVNWDDNPQHLHAWREGRTGYPFIDAIMTQLRTEGWIHHLARHAVACFLTRG  
DLWVSWEEGLKVFEELLLDADWSLNAGNWLWLSGSTFFHRYFHIYSPVAFGKKTD RDGAYIRKYLPIILKDFPV  
KYIYEPWKAPQAVQEQAGCLVGTHYPQPIVEHGEASKRNLGRMKAARAQK

>Pandion\_hali\_\_NXS77093.1

MSHRTIHLFRKGLRLHDNP TLLAALECESEVVYPVYILDRKFMMMSVMHIGTLRWHFLLQSLEDLQKNLCQLGSC  
LLVIQGEYKSVLRDHIQKWNITQVTLD AEMEPFYREMEANIRHLGEELGFVLSLVGHSLYDTRKILDLNSGT  
PPLTYKKFLHILSLLGDPEVPVRNLMAEDFQRCRPPDPGLAECYRVPLPVDLKIPAESLSPWRGGETEGLQRL  
EQHLTDQGWVASFTKPKTFPNSLLPSTTGLSPYFSMGCLSVRTFFYRLSNIYAQAKHHSLLPPVSLQGQLLWRE  
FFYTVASATPNFTKMAGNPICLQISWYEDA EKLHKWKTAQTGF PWIDAIMTQLRQEGWIHHLARHAVACFLTR  
GDLWISWEEGMKVFEELLLDADYSINAGNMMWLSASAFFHQYTRIFCPIRF GKRMDPEGQYIRKYLPIILKNFP  
SKYIYEPWTATEEEQKQAGCII GQDYPFPMVNHKEASDHNLRLMKQVREEQYRTAQLTRDDTDDPMEMKVKRD  
HSEENVSKGKVARLTE

>Pangasianodon\_hypo\_\_XP\_026791694.2

MTRLCYKILFCTCEVDFAAFLRHVFRIRC VSDVKRFSVIMPAKKRNLKRKGEPLKGPEKLS PGRGAGRGAGWL  
QGKVAEIRRNSAECKFNMKRLRFLTD A QKVRQCGAVLYWMARDQRVQDNWALVYAQQLALEENLPLHVCFC  
VPQYLEWTYRQYAFALRGLQEVAKECTSLNIQFHLLRGEPELTLP GFVKHWDIGAVVTD FNPRLPLQWTEHV  
KKELPSDVPFIQVDAHNVPVPCWEASNKLEYAARTIRGKITKLLPEFLTEFPVDMH PHLSTKTAKKVDWEEVM  
SSLEVDRSVGEVLWAKPGMTEGIAMLESFIDQRLRLFATERNNPNANALSQ LSPWIHSGQISAQRVLLEVRRW  
GKRLTESVSSFTHEELVRRELSDNFCFYNDNYDNINGAYDWAKKTLQDHAKDARPYLYTREQLENADTYDQLW  
NAAQRQIVLEGKMHGFM RMYWAKKILEWTASPEEAVNIS IYLNDRYALDGC DPNGYVGC MWSICGIHDQGWAE  
RPVFGKIRYMN YAGCKRKFDVGQFERKYAGKKS

>Pangasianodon\_hypo\_\_XP\_034161949.1

MVVNSVHWFRKGLRLHDNPALQEA LNGADSARC VYVLD PWFAGAA NVGVNRWRFLLESLEDLDTSLRKLNSRL  
FVVRGQPADVF PRLFK EWNVTRLTFEYDSEPYGKERDGA I KMAQEFGVETIVRHSHTLYNPDRI IEMNNNNP  
PLTFKRQFQAI VSRLELPKKPLPTITPEQMASCSTQ LSENHDKHYGVPSLEELGFKAQKGAPVWRGGETEAL  
RLNKHLDRAKAWVANFERPRIKAHSLFASPTGLSPYLCFGCLSSRVLYYHLRELYMKLRRRSSPPLSLFRQLLW  
REFFYTAATNNPSFDRMEGNPICVQIPWDKNPEALAKWAEGR TGFPWIDAIMCQLRQEGWIHHLARHAVACFL  
TRGDLWISWESGMRVFEELLLDADWSVNAGSMMWLSCSAFFQ QFFHCYCPVGFGRRIDPSGDYIRRYIPELKD  
YPSRYIYEPWNTPEAIQKAANCIVGVDY PKPMINHAESSRLNIERMKQVYQQLSHYRGLSLLASVPTIQEEAE  
PSMSDDSQASSSGAISASHQPP PQSEPQPSQTD PDPDPQNPAP EPSASSAPAAMRKRGC SSEPQNSQNPKVQ  
HTSQTKAEQLHTDSKQ

>Pangasianodon\_hypo\_\_XP\_034162258.1

MAPNSIHWFRKGLRLHDNPALQEA VRGAGTIRC VYFLDPWFAGSSNLGVNRWRFL LQCLDDLDSSLRKLNSRL  
FVIRGQPANVF PRLFK EWEISRLTFEYDSEPF GKERDAAIKKLAMEAGVEVIVKISHTLYNLDKI IELNGGQP  
PLTYKRQFQTLISRMDPPEMPVETLSSSLMGCCVTPVSEDHGD KYGVPSLEELGFDTEGLPSAVWPGGETEALT  
RIERHLERKAWVANFERPRMNANSLASPTGLSPYLRFGCLSCRLFYFKLTDLYRKVKKTSTPPLSLY GQLLW  
REFFYTAATTNPRFDKMEGNPICVRI PWDKNPEALAKWAEAKTGFPWIDAIMTQLRQEGWIHHLARHAVACFL  
TRGDLWISWEEGMKVFEELLLDADWSVNAGSMMWLSCSSFFQ QFFHCYCPVGFGRRIDP NGDFIRRYLPILRG  
FPAKYIYDPWNAPDSVQAAAKCII GVHYPKPMVNHAEASRLNIERMKQIYQQLSRYRGLGLLASVPSTHNGNG  
NGMAYSPGEQQSGTNT PAPAISSGSSVANGNRSGSILLNFDSEEHQGPSRMQQQQKLGRVLHTAGRVTC KRE  
SERDTEGDDTLSTSHKLQRQIAEITTVYGTNGNQPGMK S

>Paragonimus\_kell\_\_KAF6776971.1

MLFDFLTNRHL YDKHRNDPTKVAQSGLS PWLHFGQLAPQ RVLLETRAVRNLHSKSADAFIEETFVRRELADN  
FCFYNP RYDSL D GAYKWAQDTLQMHAKDKRNPAYTDAQMENAKTTGRPVERMST SACS RGEDARISAHVLG

>Paragonimus\_wes\_\_KAA3677470.1\_photolyase

MMSAVSGDLKMAKTDLVSWTSN ILQRRNSLGGSV RDPFPAKCRVRQLKGP NLPFELDGAITTDKIGMGGVLY  
WMIRDHRVQDNWAFLYAQRLALKFGVPLHACFCLSPRYQADTLRHFAFMLEGLSEVEEECNQLNIPFHLVQAK  
TTISTISTGMKRTLSDIGHSEGYSH ELAVANSVLT LVRDLRIGCVVTD FCP LREPTAWIEMLLKLVP EEPVVC  
QVDAHNVVPVWYASDKLEYAARTIRK LHDKATGLWTEFPPLIAHPLAKSTTS PQRIVWSDLRTHFP GDCQV  
KPVKWAKGGSNAGLEVLFD FLSNRLHLYDKHRNDPTKVAQSGLS PWLHFGQLAPQ RVLLETRAVRNVHAKSAD  
AFIEEIFVRRELADNFCFYNP RYDSL D GAYKWAQDTLHLHAKDTRNPAYTDAQMETAKTKDDLWNACQHQLVH  
MGKMHGFLRM YWAKKILEWHKSGPEAALRLALYLNDRYSLDGS DPNGVVGVMWSICGVHDQGWAE AIFGKIR  
CMTYKGCQNKF SIPTFVAKQKNNAL

>Paralichthys\_oliv\_\_XP\_019934037.1

MPPSAAGAEDSKALVRQLLREV LVGREDPEGFFAMCVSVL GQQETRTQFQSLIQPLSSANRSLHCRLTSIYLE  
YFSKTEDDDLELALALSVLDVKDHQPSTCSE EYKLQQLGAKVNQSSSVQLTSASQPQGSSSRTQRADVGGGRK

KNHSSEKEPVGVMCPPQTQETELQKSTHVDKCNKETPGTSQSVCVSKPYTSFFKQDAVLKGDQTTEEGDSIN  
QSEKLKRSKNRRKRREGNGQQVVGMPSTSPSAPPPVLLWFRDLRLCDNPALIGSLENGAPVIPVFIWSPPEEEE  
GPGITVAMGGACKYWLHQALSCFSSSLERIGSHLVFLKANGVGNVGVSSSLRTLKELVKETGARAVLANALYEP  
WLKERDDVVVSALQKVGVCQRMFHSYCLRDPYSVSTEGVGLRGIGSVSHFMSCKQNPNESALGLPLDPPASLP  
TPAHWPQGVSLDALELALMPRRKDGTIDWAGDIRKSWDFSEEGAHAQLEAFNDGVYRYEKESGRADAPNTS  
SLSPYLHFGQLSPSWLLWDAKGARCRPRKFQQRKLAWRDLAYWQLTLFPDLPWESLRPPYKALRWSTDRGHLKA  
WQRGRTGFPLVDAAMRQLWLTGWMNNYMRHVVASFLIAYLHLPWQEGYRWFQDTLLDADVAIDAMMWQNGGMC  
GLDHWNFVMHPVDAAMTCDPYGSYVRRWCPELADVPDELIHKPWKCPASMLRRAGVVFGRTPDRIVTDLEER  
RSQSLQDVAVVRREFGQYVDKRSKCDLVPLPPRLVSEALGLSHRNNGGVVTEGKQFLLPVITRMEFKHQQEDPD  
ADGASNYPYNAVLKGYVSRKRDETI AFLNERDFTASVMHEGVQRKERLESNYRRMEGLPQPPAPQGRARRTPKA  
KDRFSVVPGGAVTSLR

>Paralichthys\_oliv\_\_XP\_019935864.1

MAHTCIHWFRKGLRLHDNPALLAALRDCKQLYPVFLLDPHLYNDTRMGINCWRFLLGALKDLDCSLRKLNSRL  
FVVQGRPEDVLPKLFNKWKVTKLTYEYDTEPYSILVRDKTVTALAKEHGVVEVIYKISHTLYDIERIIEENNGKA  
PLTYNRMQAIVKTLGPPKKPVPAPTLEDMAEVKTPCPDSHEQQYEIPALEELCPDAAALGEELFPGGEQEALR  
RLDEHMKQTAWVCKFEKPQTSNLSLSPSTTVLSPYVTFGCLSARTFWWRLLTDVYRGKKHSDPPVSLHGQLLWR  
EFFYTASVGIPNFNKMGVNPVCTQIDWDTNSEYLAARWREARTGFPFIDAIMTQLRQEGWIHHLARHAVACFLT  
RGDLWISWEEGQKVFEELLLDGDWALNAGNWQWLSASTFFHQYFRVYSPVAFGKKTDKNGDYIKKYLPLLKKF  
PAQYIYEPWKAAPRSVQQAAGCIVGKDYPHPIVQHEVISKKNIQRMKSAYAKRSSDNTDSPTKKQGVKRKGPSV  
VDMKKKKERRKSSSS

>Paralichthys\_oliv\_\_XP\_019942880.1

MMSVSRTIICLLRNDLRLHDNLELFWHAQRNAEHIVPLYCFDPRHYVGTYNYNLPKTGPFRLRFLLESIRDLRN  
TLLNKGSNLVVRGKPEDVVAELIKQLGSVSTVVFHEEVTSEELNVEKKVRDVCAMKVKVHTCWGSTLHHRE  
DLPFHMSRLPDVYTEFRKAVESRSRVRPVFPAPPEQLNPLPPGLDEGAIPTAQDLQQTEPLTDPRSAFPCSGG  
ESQALARLKHIFYWDTDAVATYKETRNLIGVDYSTKFAPWLAIGCISPRYIYHQIKQYERERTANQSTYVWIF  
ELLWRDYFKFVGKYGKGLFQVKGLEKSVPWKKDMKLFNAWKEGHTGVFPVDANMRELAMTGFMNSNRGRQNV  
ASFLTDLGLDWRMGAWEFYEYLLIDHDVCSNYGNWLYSAGIGNDPRENKRFNMKQGLDYDNNGDYVRQWIPE  
LQEIIRGSDVHMPWTLSPAALSHAVSLNETYPSPIVMAPEWNRHVNNKSSATGPSRGRGQSHTPKQHRDRG  
IDFYFSRSKNL

>Paralichthys\_oliv\_\_XP\_019957739.1

MVNSIHWFRKGLRLHDNPRLRDSIRGADTLRCIYILDPWFAGSSNVGINRWRFLLSLEDLDASLRKLNSRL  
FVIRGQPTDVFPRLFKEWQITHLSYEYDSEFPFGKERDATIQKLANKAAVEVMVQISHTLYDLDKIIEENGGQT  
PRTYKSFEDLINCMPVDVPAETITSEVIKKCAMPIGADHDVKFGVPSLEELGFETEGTLAAVWPGGETEALM  
RLERHLERKAWVANSEYPRINANSLLASPTGLSPYLRFGCLSCRLFYFKLTDLYRKEKENSCKPLCFYQQLLL  
REFFYTATNNPCFDKMEGNPACVQIPWDRNPEALAKWAEGRGTGFPWIDAIMTQLRQEGWIHHLAWRAVACFL  
TRGDLWISWEEGMKVFEELLLDADWSVNAGSWMWFSCSSFFQQFFRCYCPVGLGRRTDPNVEYIRRYLPILRG  
FPAKYIYDPWNAPEEVQKAAKCIIGEHYPKPMVNHAEEASRINIERMKQIYQQPSCYSGLGLLATVPANPHNGV  
RSSNTGTSGRPGGSDEQLYNLEGTSTRTGRGQWTQKRRSEEPAGSGSISKSWRQSK

>Paralichthys\_oliv\_\_XP\_019958265.1

MRRRRKALWATQFYSSSTTPCYKSPNTGGRVSVLSADVCCSQRLAVWWFTLRVKLVFRLHADRRTSGFIRCMFY  
SWRSSAPRRLTLRNQRSPTPLLFCTSFSTVCTMSDKKRAAPASKGPASKQQKVPMKQEEKQQQKPEGW  
LQDLLMKQRSRVKGANFNKKRLRFISDTENMKQDSEGVLYWMSRDQRIQDNWALIHAQKLAVKKNLPLHVCFC  
LFVPKSELSTLRHYSFLLNGLKEVAEECKALDIQFHLLHGAAGDVLPGFVSDRSLGAVVTDSPLEPQEWLE  
DIKKKLPKDILFKQVDAHNVVPCWEASPKQEYSARTIRGITKLLPDFLTDFFPVEKHPVTATRTAKPIKWEK  
TLASLSVDREVGEPEWAKPGTKAGLAMLESFIDVRLKVYDNQRNDPNVNALSQLSFWLRFHGHI SAQRVALQVE  
SSGKAGQNISSFIEELVVRRELTDNFCFYNNKYDRVEGAYEWAQKTLKDHAKDERPYFYTREQLEKAQTHDK  
LWNGAQYQMVTGKMHGFLRMWAKKILEWTSSPEEALSIALYLNDRYELDGQDPNGFVGCMWSICGIHDQGW  
AERPVGKIRYMNKGLRKFDVLKFEKKYCPKNL

>Paralichthys\_oliv\_\_XP\_019962786.1

IIEMNNNSPPLTFKRFQTIIVSRLELPRRLPPVPTQQQMDKCRTKITNNHDQLYSISLEELGFRTVGLPSAVW  
TGGSEALDRLNKHLDKVVVANLEHPRVNTCSLYASPTGLSPYLRFGCLSCRVLYYNLRELYMKLRKRCSP  
LSLFGQLLWREFFYTAATNNPNFDRMDANPICVQIPWDQNPEALAKWAEGRGTGFPWIDAIMTQLRQEGWIHHL  
ARHAVACFLTRGDLWISWESGMKVFEELLLDADWSVNAGSWMWLSCSAFFQQFFHCYCPVGFGRRTDPSGDYI  
RRYIPILKDYPNRYIYEPWNAPEVQKAANCVVGVDPKPMINHAEGSRLNIERMKQVYQQLSHYRGLSLLAS  
VPTIQEEAEPPMTDESQNSSGPDSPPRDPAHSEAAGCSTAPDSSTVYVSCAPHPELDDAQNPRPSQTPCTSSG  
SHPPTPAAVSWTFVGHPPSTAAPPSPASAHSPLSRSRPPSPSSSCLTSSPAPSPAVTPVQTFPKRGLARKVR  
RSQRQRGRPSCATSGREGERTEEEEEEEDTGEDERMEEEDVDQEEGERMEEETSEAVRQGGV

>Parambassis\_rang\_\_XP\_028257055.1

MAHTCIYFRKGLRLHDNPALIAALRDCKEFYPVFIILDPYLYHNTRVGNRRGRFLIGALKDLDCSLRNLSRL  
FVVRGKPEDVFPKLFNKWKVTKLAYEYDTEPYSLSRDEKVTKLAKEHGVVEVIYKISHTLYDINRIIEENNGKT

PLTYNRLQAIVKTLGPPKRPVAAPTKEDEMDKDVKTPCSDSHEKEYGILTLEELHLDTTSLKEELFPGGGEQALR  
RLDEHMKRTAWVCNFEKQPQTSFNSLSPSTTVLSPYVTFGCLSAFTFWRLRDVYQGGKHSDPPVSLHGQLLWR  
EFFYTASVGIPNFKMEGNPVCTQVDWDNTNPEYLAAWREGRTGFPFIDAIMTQLRQEGWIHHLARHSVACFLT  
RGDLWINWEEGQKVFEELLLDGDWALNAGNWQWLSASTFFHQFFRVYSPVAFGKKTDKNGDYIKKYLPLLKKF  
PAEYIYEPWKAAPRSVQQAAGCIVGKDYPHPIVQHEVISKKNIQRMKQAYAKRSPDTSESSSKQGLKRRTPSA  
IDMFNKKKRVK

>Parambassis\_rang\_\_XP\_028263365.1

MVVNSVHWFRKGLRLHDNPSLRESIQGAETLRICIYILDPWFAGSSSVGINRWRFLHCLLEDLDASLRKLNSRL  
FVIRGQPTDVFPRLFKEWKITRLSYEYDSEPFQGERDAAIHKLASEAGVEVMGRISHTLYDLDKIELNGGQS  
PLTYKRFQALINRMDAVELPAETITSEVLKKCATPINDDHDDKYGVPSLEELGFETEGLTSAVWPGGETEALM  
RLERHLERKAWVANFERPRMNANSLASPTGLSPYLRFGCLSCRLFYFKLTDLYRKVKKNSTPPQSLYGQLLW  
REFFYTATNNSCFDKMEGNPVCVQIPWNRNPEALAKWAEGRTGFPWIDAIMTQLRQEGWIHHLARHAVACFL  
TRGDLWISWEEGMKVFEELLLDADWSVNAGSWMWLSCSSFFQQFFHCYCPVGFGRRTDPNGDYIRRYLPILRG  
FPAKYIYDPWTAPEDVQKVAKCIIGVHYPKPMVNHAEASRINIERMKQIYQQLSCYRGLGLLATVPANPNNGN  
NGSNVGGVNTGASHGSGASTDPSTQEAASRTERGQPVQKRRREEAQPESGAKSFKQSK

>Parambassis\_rang\_\_XP\_028282443.1

MLHCIRKSASFYFASRPSVLFLLSSSVTSKTTMSAKKRKSAVSAAPGKEPSAKQQKVEEEEKKERVEGWLLS  
LVEKQRSEKKEMKFNNRNLNFISDTVKIKQSGEGLVYWMRLDRHVQDNWALIHAQQQLAVQENLPLHVCVCMVV  
PKSKLSTLRHYSFMLKGLKEVAKECEHLNIQFHLHGEAGDVLPGFVSDRGLGAVVTDFSPLREPLQWLEDVK  
KRLPKDIPIIQVDAHNIVPCWVASPKLEYSARTIRGKITKLLPEFLTDFPLVEKHPCTATRTAKLVDWDETLA  
SLKVDKTVGETEWAKPGTKAGLAMLESFIDVRLKIFGAQRNDPNAHALSQLSPWIRFGHISAQRVALQVRQSG  
KNAAESVAPFIEELVVRRELTDNFCFYNNKYDSVEGASEWARKTLKDHSEDKRAYLYTREQLEKAETHDKLWN  
AAQYQMVSEGMHGFRLMYWAKKILEWTSSPEEALSIALYLNDRYELDGQDPNGFVGCMMWSICGIHDQGWPER  
PVFGKIRYMNYKGCLRKFNVAFQFEKQYSPKNL

>Parambassis\_rang\_\_XP\_028286007.1

MVVNSVHWFRKGLRLHDNPAEQEALNGADTVRCVYILDPWFAGAANVGINRWRFLLEALEDLDSLLKKLNSRL  
FVVRGQPTDVFPRLFKEWNVTRLTFEYDPEPYGKERDGAIIKMAQEFQVETVIRNSHTLYNLDRIDEMNNNSP  
PLTFKRFQITIVSRLELPRRPLPPIITQQQMDKCRNTIADNHDQLYSIPSLLEELGFRTEGLPSAVWRGGESEALD  
RLNKHLDKKVWVANLEHPRVNTCSLYASPTGLSPYLRFGCLSCRVLYYNLRELYMKLRKRCSPPLSLFGQLLW  
REFFYTAATNNPNFDRMEGNPICVQIPWDQNPEALAKWAEGRTGFPWIDAIMTQLRQEGWIHHLARHAVACFL  
TRGDLWISWESGMKVFEELLLDADWSVNAGSWMWLSCSAFAFFQQFFHCYCPVGFGRRTDPTGDYIRRYIPILKD  
YPNRYIYEPWNAPEALQKAANCVVGVDPKPMINHAEGSRNLIERMKQVYQQLSHYRGLSLLASVPTIQEEAE  
PPMTDESQTSSDPDPPRRPADVEAVGCSTAPDSSTACPSSTVALQEEEEEDTAHSHLAQTFFVSSGSPTQPS  
MLAPSPLSWSKPPSSSPSSCPASSPSLSPSPALNQISCMGPRRKSITRKMRRSQRQRGRQSSSAPSAREGEKE  
EVGGEARMEETEQQEEERMEETAGQQ

>Parambassis\_rang\_\_XP\_028287972.1

MPPSATAAAQATVRAVLREVIVGREDPEGFFAICLSLLGHQETRSQFLSLIQPLSTGNRSQHSILVSIYQEYF  
SNTEDDELEHALALSLLEVKDQQPSTPRQESQLLQPGDRPSQSSLDHLKLESRSQDGWKKNIYAAQTGAWSKK  
CTTQTEREIKLQNSTHLDNHNQTCGTGQTLCDSGNSAKQDTSEQIKAESAVNQSEKPKRYKNRRRRRKAVGQ  
QHVGLPCSPSAALPVLLWVRDLRLCDNPALTASLELGSPIPVFIWSPEEEEGGPGVTAMGGACKYWLHQAL  
SCFCSSLEHIGSHLVLLKANGHGKEAGSSLHTLKELIKETGAKTVLANALYEPWLKERDDVVVSALQKESVEC  
RMFHSYCLRDPIYAVSTEGVGLRGIGSVSHFMSCCRQNPQPTVGIQDPPGSLPSPAHWPQGVSLDTLGLARMP  
RRKDGTADWAANIRKSWDFSEEGAARLETFLQDGVYRYEKESGRADAPNTSCLSPYLHFGQLSPRWLLWDA  
REARCRPPKFQRLAWRDLAYWQLTLFPDLPWESLRPPYKALRWSTDRLGLKAWQRGKTGYPLVDAAMRQLWL  
TGWMNNYMRHVVASFLIAYLHLPWQEGYRWFQDTLVDADVAIDAMMWQNGGMCGLDHNFMHPVDAAMTCDP  
YGSYVRKWCPELTDLPDELIHRPWKCPASMLRRAGVVFGQTYPQRIITDLEERRTRSLQDVASVRRFEGQYVD  
KHSGCDLVPLPRLVSEALGLSHSDGAVVTEGKQFLLPVITRMEFKHQLEDPDGDAASNPNYNAVLRKGYVNRNR  
DETIAFLNEKDFTASVMHEGTQRKERQEKNYRRMEGLPLAPSPGGRARRTPAKDQFSVVPGGAVTSPR

>Parambassis\_rang\_\_XP\_028288837.1

MSTSRITICLLRNDLRLHDNELFHWQRNAEHIVPLYCFDPRHYGGTYNNLPKTPGFRRLRFLLESIRDRLNT  
LINKGSNLVVRHKGPEEVVASLIKQLGSVNTVAFHEEVTSEELNVEKKVKEVCAQMKVKVHTCWGSTLYHRDD  
LPFHLISRLPDVYTQFRKATETQSRVRPVFPTPEKLNPLPTGLEEGAIPTAEDLQQTEPVTDPRSAFPCSGGE  
SHALARLKHIFYWDTDAVATYKETRNLIGVDYSTKFAPWLALGCISPRYIFHQIKQYETERTANQSTYWVIFE  
LLWRDYFKFVAVKYGNRLFQVNLQDKSVPWKKDMKLFNAWKEGRTGVPFVDANMRELALTGFMSNRGRQNV  
SFLTDLGLDWRMGAEWFEYLLIDYDVCSNYGNWLYSAGVGNDRNRKFNMIKQGLDYDSTGDYVRQWVPEL  
QSIRGADAHAPWTLSSAAALSHAVSLGETYPAPIVMAPEWSRHINQKASGSGSPRGGKGPSHTPKQHRDRGI  
DFYFSRSKNL

>Paramecium\_tet\_XP\_001458001.1\_(macronucl

MKERIKYLNDKKVNVKGYVAYWIIQASQRTKYNHAELEIAIQKANQEQIPLFCFFGLTKYPAANQRPYHFMLEG  
LQQLKTSLADRKILFGVAKQSPDDLAISSIAQNAKLLIVDCGYLRIQKQWRKKVADTIDCQFIQVETDVLVPVE

QASQKEEWAAKTIRPKIQSLTKYFAKELNEETLVKQMDKLPFQEYDISNITKVIDDLGVDSVSI VQQFKGGE  
IEAQKRLEEFNLKKNYAKNRNDPSLNATSNLSPYLHFGMISPLHIYLEAMKFPSPSESRESFLEELIVRREL  
SMNFCYNDLYDKYEGLPDWAKNTLQEHAKDKRDYIYTLQLEKAKTHDVYWN SAQLEAIHKGKISGYMRMYW  
GKKVIEWTESPQQAFEYLVFLNDKYHLDGRDANGYTGVAWCFGKHDRPWTGRKIFGNIRYMIDSGLKRKFDTG  
QYVMNVNQLKKQSLK

>Paramicrosporidium\_sac\_PJF19504.1\_DNA\_photol

MVKVAAVENAFVWFRNDLRVTHNPALLAASQYSATHGGRVYALLVTSPLEWRSIHNWGLPKASYIVRTVSVLR  
REL SKRGIEMLLHTPTAKNATEYYKALASEIVQLCKSQNCSAVYMNAEYDGVALERDAAVASALDTAGILHHT  
THDQCVPVPGKVLTQSGTPYKVFSQFKKTWIRYIEEHGLDMIDSEPTIEKSSTILPDIELDLGYDMHEY PNW  
DLNALHTTFFPAGETEARKRLHEFLQKSVSGYHEDRNHFMEGGASKLSAPLAVGAISLTECLLAARIANKGALN  
SGSPGLLTWMSEL CWRDFYRHVLFHFPHVGRGASFRPEFEHLSWRGWPPNIEPAAEEHFQAWCEGRTGYPIVD  
AAMRQLRREGWLCNRLRMVAMFLT KDLRHWRERGEQHFNQFLVDYDFSSNNGGWQWSASTGTDAQPYFRI FN  
PLLQSEKFDPSGDYIRRYVDEL SKVSAPSISHPFKRCKGFDQLKYPRPIVDH SKVKEQVLALFTAATTVTTKR  
PAD

>Paramormyrops\_kingsleyae\_XP\_023657742.1\_cryptochro

MVVNTIHWFRKGLRLHDNP SLRESIQGADTVRCVYILDPWFAGSSNVGINRWRFL LQCLEDLDTSLRKLNSRL  
FVIRGQPTDVF PRLFKENISRLSYEYDSEPF GKERDAAIRKLASEAGVEVTVRISHTLYDLDKI IELNGGQS  
PLTYKRFQSLISCMEAVETPAEPITADVAKCATPVSDDHDDKFGVPSLEELGFNTEGLSTAVWPGGETEALT  
RLERHLERKAWVANFERPRMNANSL LASPTGLSPYLRFGCLSCRLFYFKLTDLYKKVKKNSSPPLSLYGQLLW  
REFFYAAATNNPRF DKMEGNPICVQIPWDRNPEALAKWAEGR TGFPWIDAIMTQLRQEGWIHHLARHAVACFL  
TRGDLWISWEEGMKVFEELLLDADWSVNAGSWMWLSCSSFFQQFFHCYCPVGFGRRTPNGDYIRRYLPVLRG  
FPAKYIYDPWNAPEGVQKMAKCIIGVHYPKPMVHAEASRLNIERMKQIYQQLSCYRGLGLLATVPSTPSGGN  
DEAGAAMGFPLREGAQDSA AHAGYQVPVNPAGDWCAGMLPPPQGDNKP GSSSMAQQNVPAGLSMCYNQERPQS  
QTAGSQPGEDLRPFHISPCIVTSNIK

>Paramormyrops\_kingsleyae\_XP\_023661931.1\_cryptochro

MVVNSVHWFRKGLRLHDNPALQEALNGADTVRCVYILDPWFAGSANVGINRCRFLLESLEDLDTSLRKLNSRL  
FVVRGQPADVF PRLFKENNVTRLTFEYDSEPYGKERDAMI IMAKEFGIETVVRNSHTLYNLDKI IELNNNSP  
PLTFKRFQAI VNRLELPKKPLPTVTRQQMDSCWTDVLVNHDERFGVPSLEELGFKTQRLSPAVWKGGEALD  
RLKKHLDRKAWVANFERPQINVCSLIASPTGLSPYLRFGCLSSRLFYELRDLYLKVRKHNPPLSLFGQLLW  
REFFYTAATNNQNFDRMEGNPICVQIPWDHPESLAKWAEGR TGFPWIDAIMTQLRQEGWIHPLARHAVACFL  
TRGDLWLSWESGMRVFEELLLDADWSINAGSWMWLSCSGFFQQFFHCYCPVGFGRRTPSGEYIRRYIPKLKN  
YPNRYIYEPWNA PETVQKAADC VVGKDYPKPMINHAESSRLNIERMKQVYQQLSRYKGLSLLATVPTIQEEVE  
PPAMEDSGAHSSNDVCPAQPSRKALLRKREPAEMQRAAACTQPKVQRIS SAEGSADDQQ

>Paramormyrops\_kin\_XP\_023686334.1

MSGEKTSVDVARKRAESAASGRKEPKLLRTEGWLVAEVDGLRRAASGAEVNTQRLRFLSQTEKVKQGSQGV  
LYWMCRDQRVQDNWALLYAQQLALAEQLPLHVCFC LMPRFLDATIRQFGFMLEGLREVATECRTLEIQFHLL  
GAAAEVLPGFVKDWALGT VVTDFFPLRVPLQWVEDVKKGLPDV PFIQVDAHNVP CWLASDKQEYSARTMRG  
KITKLLPKFLTEFP PVEKHPHCAQRPVASVDWDRARSFVKVDP TVGGEVQWARAGTAAGMATLESFIEQRLHSY  
AAHRNDPNCAALSHLS PWLHAGQISAQRAVLQVRRGGARGSPSVDAFVEEAVLRRELADNFCYYNRN YDCVEG  
AYEWARMSLQDHAKDHRPYLSRQELEGARTGDKLWNAAQNQLVLEGKMHGFM RMYWAKKILEWTSSPEEALS  
ISLYLNDRYSLDGNDPNGYVGC MWSICGIHDQGWKERPIFGNIRYMN YNGCKRKFDVSAFEKQYGPQQLKIS

>Parasteatoda\_tepi\_\_XP\_015913173.1

MSHENAIHWFRKCLRIHDNPALLEAIKNSKHFWPIFILD PWFVKNMKCGPNRWRFLAQSLQDLDDSLRKFN SR  
LFVIRGKPMEVFPQIVKKWKIKLLTFESDTEPYAKVRDEEIQTLMKILKVEVCTFSTNTIYNPEKIEFN GKV  
PLTMQAYLNI VDKIGLPAKPVQSEEKIIQLTSDKERCSPLEDISDSKYDVPTLEELGVK VNDLYPCLYPGGET  
EALKRLERSLSNEQYVCKFSKPDTFPNSIKPSTTVLSPYVKFGCL SARTFYYKIRDVYLKSKSGYTKPPVSLH  
GQLFWREFFYTVGSVTPHFDQMIENSVC RQIPWMENKEHLEAWAHGRTGYPFIDAIMTQLRQEGWVHHLARHA  
VACFLTRGDLWISWEHGMKVFEELLLDADWSLNAGNWMWL SASAFFHQYYRVYSPIAFGKKT DKNGDYIRKYV  
PILKRFPP EYIYEPWKAPKKLQEQLGCVIGKDYPSPIVDHDKARVENLRMDAVYKSAKESGGKKSASPKKSQ  
KQSPKASSSHQTSAL SSTPKSTKRANSQQQNKITKFLKLQ

>Parasteatoda\_tepi\_\_XP\_015915881.1

MSNLKQKNVIHWFRKGLRLHDQPALKEGLQGASTWR CVFILD PWFAGSSNVGINKWRFL LQCLENLDNNLRKL  
NSRLFVIRGQPADVF PRLFLKWKTHLTTFEKDPEPYGRIRD LNITTTMAQENG VNVITRTSHTLYDLEKIEKN  
GGKSPLTYKQFQNILANMEQPPLPLPRITFEDLSNCYTPLSE DHEEKYGVPTLEELGFDTENLKPPVWLGET  
EALTRLERHLERKAWVASFGRPKMTPQSLLPSQTGLSPYLRFGCL SARLFYLELAELYRKIKKVNPPLSLHGQ  
ILWREFFYCAATNNPKFDHMGVGNPMCVQIPWDVNSDALAKW TSGQTGFPWIDAIMTQLREEGWIH HVARHAVA  
CFLTRGDLWISWEEGMKVFEELLLDADWSVNAGSWMWLSCSSFFQQFFHLYCPIRFGRKADPN GDYIRRYLPV  
LKNFPTKFIHEPWIAPEKVQHA AKCVIGKDYPMPIVNHQDVSHINLERMKQVYQQLSHYRGANMSNPPRPIQD  
RDDEGYQKSVKRRAVEYSENSRWKAMKEA

>Parasteatoda\_tepi\_\_XP\_042907496.1

MLKGLQEVEEECKSLNIHFHLLLGESKNVLPKFVKDNQVGGVVTDFSPLRVPQKWVSELASKLPPDVPLCQVD  
AHNIVPCWVASDKQEYGARTIRKKIHDKLKEYLTDFFPVVKNKLTPECKFKPVDWNSVEEILEVNMDVDEVKW  
AIPGTTAGLKQLSSFCCKDLKHFHDCRNDPTKNNLSNLSFWHFHGGQLSIQRTILVVSKLRSKYPASVDFAFVEE  
AVIRRELSDNFCFYNNKYDQVDGAYDWAKKTLKDHSDKREYIYTKEQFENAKTHDLLWNAQRQLKKEGKM  
HGFRLMYWAKKILEWTNSPEEAEFAIYFNDKYNLDGRDPNGYVGCWMSICGIHDQGWAERAVFGKIRFMNFKG  
CQRKFDVNAFIQRYREK

>Parasteatoda\_tepi\_\_XP\_042908256.1

MADGQLIHWFRNDLRLHDMPSLSLAMTKCSKLYPVYIFDKTGILEKRIGYNRLRYIIESLEDIDRTFKASGGR  
LYVFCGEPTKIMKDLMTDWNITHLSYEDDIQPVWTDVESSIQDFCRERNVEIINKVSHSTLYDPKDILKANRGN  
PPVTYNVFCQVAQSLGPPPKPEPPLKFENIMLSNEEVLDSKIPSSPEDLGATMECPEQTNRIRWGGGERKALEL  
LNNRLQIEKDAAESGILMPNQAQPDLLSPSMSLSAPLSMGCLSVRKEENDSMLECWNEGKTGFPLIDAAVRQM  
RQEGWIHHVARNAIACFLTRGDLWISWEEGFKTFMKYIMIDADFAVCAGNWMWVSSSAFENILQCPSCVSPVTY  
LRRFDRSGNYIKKYIPELKNMPTQFVFEPWLAPLSIQESAGCILGKDYPLPIVNHDMAATKSTEKMNAIKEKF  
LTKSVPLHCTPSSPAETRIFMWLPENCLDNLIPQN

>Patiria\_min\_XP\_038049378.1

MAKGEKKGKPKATRLKTADEGSSSSSSSLATSPPSKKLKTENGTSDDSEQEFQQVKSAPSEAQGIMEKLAALR  
LRTAASVAAFKFNKKRVRVLSQVKDVPEGCHGIVYWMSRDQVRVDNWSMLYAQRLAMKLAVPLRVCFCLQPRF  
LDATIRHFAMKLGLAEVEQEKLKELDIPFHLLIGEAKDVLNPFVKDHNIGGLVTDSPLRVPKSWVKEATESL  
PDIPVCQVDTHNIVPCWEASPKLEYGARTIRPKITKLLPTFLTEFPPVVKHPHQAKPMPKPDWDAAADCSLDV  
DRTVGEVSWAKPGTTAGLLMLEEFCLKRLKYFGADRNNPNKSALSNSLPWIHFGQISAQRAALVVRGYRSKYS  
KSVEGYIEESVVRRELSDNFCFYNNYDSIQGTNDWAKQTLKVHAKDKREYVYSKERLEKARTHDDLWNAAQV  
QLVKEAKMHGFLRMWAKKILEWTPSPEEAEIAIYLNDKYSLDGRDPNGYVGCWMSICGIHDQGWAERPVG  
KIRYMNYNGCKRKFDVAQFVRKYKQKL

>Patiria\_min\_XP\_038063798.1

MHVRYENVELEGLPPSYSLTSKYHTVERKRAMAKYHQQSLHWFRKGLRLHDNPSSLAAVRDSQEFRAVFILD  
PMFVKSGTVGINRWRFLQLSLQDLDDGLKGLGSRLYVLRGKPTVEFDPDIFKKWKISHLTFELDTPEYATQRDE  
AVEAIAEKHGVQITKSSHTLYDIQSITRANGGKTPMTYQSLLSIVSKMAAPRKPDPALSKEDLQDCKLPVTS  
DHDSQYGVPSLEELGLDPKDAGPVLFPGGETEAVRRMEEHLERQEWVCRFEKPKTEPNTLSPSTTVLSPYLKF  
GCLSPRLFYHKIQDVYTRKKNHSPVSLHGLLWREFFYTVAATTNPFHKMEGNPVCLQVPWDTNQEYLQAW  
KEARTGYPFIDAIMTQLKQEGWIHHLARHAVACFLTRGDLWISWEEGQKVFEWLLDADYSLNAGNWMWLSAS  
AFFHQYFRVYSPIVFGKKTDKNGDYIRKYLPLVKKMPSQYIYEPWTAPRTVQEKAGCIVGTDYPRPIVEHSV  
MKNRIERMKKARAKEYGNNGPQKAISSPKTSSGGTKRKSXSKDDAGSSNKRTRKMTDF

>Patiria\_min\_XP\_038072863.1

MKRQQREQESQSGHLTDTTSTDEDALPQQEAKVQKLENDVPKSHESLTDMPTRPALGLDNKDRKKETIAVHWF  
RHGLRLHDNPSSLIDAINLASELYPIFIFDGEVAGTKVCGFNRRWFLYESLEDIDRKLKEVGGRLYTFNGDPCT  
VFNQLEEWGVNLITFEQDPEPIWQDRDNAVKRLCEERGIRCIESVSHTLWDPNEVTSRNGGTPPVTYAMFQE  
VVSTIGLPHRPSGEPDFSSVKLSICDNFDQFALPHFQDIAPKMEHPDQERQLWIGGETRALELFEVVRVREAA  
AFKAGYCLPNQYMPDLLGPPMSLSPLYLRFGLSVRKFYWRIHDTYTELNNTISPSHLTAQLIWREYFYTMSVG  
NKNFDRMNGNINCLKIDWSEDQEKLQKWTEGETGYPWIDACMKQLKVEGWIHQVARHAVACFLTRGDLWISWE  
DGLKVIFYQYLLDADWSICAGNWMWISSAFEKVLCPCNFCFVRYGRMDPNGEFVRRFLPVLVNMPRLYLFE  
PWKAPLAVQEAKAGCIIGKDYPMPIVEHRAAASSNREKMNRTVQSLEEKFSHCTPSNEVEVREFSWLPETIRGV  
EKCTADDLCEILGI

>Patiria\_min\_XP\_038073890.1

MGKRKRTRGSSRRGVSLVHWFRNKGLRLHDNPALREALVGAKTFRVCYILDPWFARSPNQGVNWKRYLLQCLE  
DLASLRKLNRLFLVRGQPSDVFPKLFQEWGVNRLSFEEDPEVFGIQRDAKIKTLAATFKVQVITRMSHTLY  
DPKEILKMNNNSPPLTYKHFYQLISLMDQPPFPEDTITLSDIEGINTAITSNHDSKYGLSSLEELGFDPEDIP  
PPVWIGGETVAKQQLDRHLERKAWVANFERPRMSSASLMACPTALGPYLRFGCLSPRLFYWRLTELYQKTKKT  
NNIPLFLHGQLYWREFFFTLGYDNPKLDEMVGNPICIQIPWEKNEEALQRWRNGQTGFPIWIDAIMTQLKQEGW  
VHPVARHAVACFLTRGDLWISWEEGAKVFEDLLDADWSVNAGNWIWLSCSSFYQQFFHCYTFCPKFGQQT  
DNGDFIRKYIPALKNFSAKYICKPWTAPLEVQEAKCIIIGKDYPPFPMVDHNEVMRRNTERMKNILQNVSQAPN  
YSNEYITSIPSLPQSSSIWVPSMSQEPQPKMLRLSQDSMPMMTQDNMMSQNNMMSQNNMMPQDNMMPQENM  
MSQDNMMSQDSMMSQDNMLSQDSMAMLSQDDVPSTSAIYITNPSGMLTLTNPYACTMTQESMMAQPSQNALG  
TSWNDPNSLANQYYNQ

>Patiria\_min\_XP\_038075073.1

MATKYRTVICLLRNDLRYHDNEVLHWAHQNADYILPLYCLDPRHYHGTWHFSFPKTPHRLKFLLESRLDLKE  
TLRQVGSNLVISRGKPVTVIQDLIRQLGQENVKAVALQQEATREELDVEAAIEKSCQVPVHKFWGSTLYHKDD  
IPFRIRDLPNVFTEFRKKTENRSDVRPTLPMPSKLLPLPPGIDPGHAPSVEEMGMKDPARDERTAFPYSGGEK  
QALARIQHYFWDYDYVSSYKETRNLIGADYSTKFSWLALGCLSPRKIYEEIRKYEKERRANQSTYVWVVEL  
LWRDYFKFVALKFGDRLFYLSGLLGNHREWRENKALFDAREGRTGVPFVDANMRELAATGFMSNRGRQNVAS  
FLTKDLKLDWRLGAEWFEHLLIDHDVCSNYGNWLYCAGVGNDPRQDRKFNMIKQGLDYDAQGDYVRLWVPELQ

GIKGGAVHTPWILSSSMLIQANVRLGHSYPLPVVKAPEWNBKMRPQERGKSGKGGPQRRQQTGRIDFYFSSGKQ  
GKFKK

>Pecten\_max\_XP\_033735988.1\_cry\_DASH-1

MKHTAARGTSFITSQNLESHYQRTNRSSWNLTMSKVIICLLRNDLRLHDNEVLHWAYKTAEYVLPIYCFDPR  
HFQGTYHFNFPKTGAHRAKFLLESAADLQNTLTKSGSGLVIRMGKPEEIVPQIIQTVGQDKVSYLCYQQEVT  
EELDVESKLQKTCGVKVQTFWGHTLYHRDDLPEFIQQLPDVYTQFRKSVGEQARVRKSFTLPDTLKPLPPGVE  
DGLPTLTKDLGLKDLTEDPRSVISFQGGESVALDRLNHYLWQSDSVSTYKETRNLVGSYSTKFSVWLAHGC  
ISPRHIYWEIKRYEAERVANQSTYWVIFELLWRDYFRFVALKYGKKLFFEGGIQGKNIPWKQDQNLKAWIEG  
RTGVPPFVDANMRELAATGFMSNRGRQNVASFLTCKDLKLDWRMGAEFESQLIDHDVCSNYGNWLYSAGIGNDP  
REDRKFNVMVKQLDYPDPEGDYVRLWLPELNKVS GGAVHTVWTLSPASLAKAEVSLGETYPNPVVAPEWSRHI  
GKSKEGAHGGGSSRPTTQKQNRGIDFYFKGSQ

>Pecten\_max\_XP\_033739658.1\_cleavage\_s

MAQQGSTQTTGVLPPEQHGYIPDKLKAEKRIEAHPYDTEAWSVLIRDAQMKTIEVARQVYERLVAQFANAGK  
YWRIYIEQEIKAKNYERVEKLFQRCVLKVLSIDLWKLYLTYIKDTKGSLSYREKMAQAYDFALDKMGMDIMS  
YQLWVDYINFLKSVDVAGSYAENQRITAVRKVYQRGVVNPMINIEALWKDYCAYENNINPLIAKMTEDRGRD  
YMNARRVAKEYEAVTRGLNKSLSPIPPSNSPEEAQQVELWKKYISWEKGNPLRTEDHALITRRVMFAYEQSLL  
CLGHHPIWIYEAASYLEESSKILTEKGDQNAKMFADAAAVERAITTLMKNNMLVYFAYADFEESRMKYEK  
VHSIYKRNLNVPDVPDPTLSYIQYMKFARRAEGIKSARSVFKMGREDNRKYQVFVAAAALMEYYCSKEKNVALK  
IFELGLKKYGECPYVLCYMEFMSHLNEDNTRVLYERVLSGGQIPPKSIEIWSRFLAFESEVGDALACIQKV  
EKRRQAIEKVVQEFEGKDTALLIDRYKYLDLYPCTTSELKAVGGYDLAKQQVVQLPSNSVTKVVMEEEEGKKA  
PEYKPKPDVEQMLPFPKPTVPIPNGSHIVDGGVFPPPPSAANLMTQLPPPECFHGPFVMDAFIEHMKKLVLDPV  
PIPQENGIDTKPDTGTQFSIDLAMGRKRKITEGEESDEERKQILHWFRKGLRLHDNPALRDALKGSSTYRCVY  
ILDPWFAGSSQVGINKWRFLQCLEDLDCSLRKLNSRLFVVRGQPTNVFPHLFKEWNITTLSEEDPEPFGKE  
RDGAIKALASEAGVETIVRISHTLYDLQKIINLNYGVSPITYKRFQMFSLKMDPPKQPVDTINAALLGKCRTP  
LSEHDDEHYGVPTLEELGFDTEGLKPAEFRGGEMEALSRLERHLERKAWVASFEKPKMTAQSLSFPSQTALSPY  
LRFGLAPRLFYWKLAELYRKVKKQSDPPLSLHGQLLWREFFYTAATNNPNFDQMKDNPICVKVPWDHNPEAL  
AKWAEGMTGYPWIDAIMRQLKQTGWIIHHLARHSVACFLTRGDLWISWEEGMKVFDLLELLDADWSVNAGMWMWL  
SCSSFFQQFFHCYCPVGFGRADPTGDFIRSYPILKNYPSKYIFEPWNAQSVQKAAKCVIGKDYVPVPIIRH  
SDVSKINMERMKQVYQLLAQRASAVSSIPKHPEDLTNKTMTALTGAHSGNHPTRGPAACNAAAQQTNIEDNDQ  
GIGSTFAVYTSAS

>Pecten\_max\_XP\_033740162.1\_cry-1-like

MEEEPQKQKIVAIHWFNRGLRIHDNPALCDALENCDEFYPIFIFDGEVAGTKFSGFNRMRFMHESLEDLDNTF  
KKNNGRLYTFQKGARDVLEGLLHEWNVTRLTYEAEVEPIWETRDKEVEELCQEHGIQLISRISHTLWNPSEVI  
EKNGGSPPVITYSHFELTTALLGPPERPVVPVNLTKVNKPVPDNFDQKFALPSVKDLGYEPECKEQMERINEWK  
GGETKALQLEERLKNERKPMTDKIMLPNQFLPDLVGPPTSMSPHLRFGCVSVRTFYWGIHDLYQEIHADKEV  
PVSLTGQLVWREYFYTMSVSNHYDKMKENPICLDIAWDEDAEKLEKWMGKTGFPPWIDAGMNQLRAEGWCHH  
VVRHAVSCFLTRGDLWINWVQGCQVFFKYQLDADWSVCAGNWMWMSSAFEKVFQCSTCFPCVGYGRMDPKG  
EYVRRYVPVLKDMPIQYLFEPWKAPYFIQEKANCIIGKDYPRPMLDHKQASMYCRSKMMEVHRRLASSSPIPH  
CAPSNSKEANFFSWLPESVLSLCNHTQHLWPENKSVGIRS

>Pecten\_max\_XP\_033752615.1\_LOW\_QUALIT

MAKKSIIHWFRLRIHDNPISLVAACENAADIKPIFILDPPWFQKNGNVGINRWRFLQLQSLQDLDSNLRKINSRL  
FVIKGPQEVLANLFKKWNITTLTYEVDTEPYAKLRDADVDDLARECGVEVIKVSHTLYDTRKIVDKNGGST  
PLTYKRLQTVVSMGLGPPPKVPPEPSKCVTSVSPNHDQNYGIPTLEDLDKDLTDCGCPCLFPGGETEALNRLDRM  
MKKTNWCTFEKPKTEPNLQPSSTTVLSPYLKFGCLSPRTMYRLVDIYKHNNKHTAPPVSLDGQLLWREFFY  
TVGIGHPKFDQMVDPNPICIQIPWDSNEEFLDAWKQGRGTGFPFIDAIMTQLKQEGWIHHLARHAVACFLTRGDL  
YISWEEGKKVFEEYLLDADWSLNAANWMWLSASSFFYQYFRVYSPIAFGKKTDKDGSIYRKYVPVLKNMPTQY  
IYEPWTAPMKVQEKAGCVIGRDYKPIVEHDKIRPINIQRMAYKKNRDPKADKSPGKGQKRKLEQNSPKPKK  
SKTTSKNSKITDFVKGKK

>Pecten\_max\_XP\_033760904.1\_photolyase

MSRDQRVQDNWAMLYAQRLALKLVPLVVCFLVPKFLEATIRHYGFMLKGLQEVEQECSRSLNINFHLLQGYA  
KDVLPGFVEDNDFGGVVTDFSLRVPVGVWVNDVKERLPKKVPFCQVDAHNIVPCWEASPKLEYGARTIRNKIH  
NQLSGFLTEFPVCEHPHKSISPQSVDWESVRGSLEVDQSVPEVSWATPGANGGLAMLESFCNDRRLRYFSSD  
RNNPNKNALSNLSPWIHFGQISVQRCILTVRKYSKSSEGVNAFIEEAVIRRELSDNFCYKNKYDSVEGAYD  
WAKQTLKIHASDKREFLYTRDQLAAGKTHDDLWNAAQIQMVKEGKMHGFLRMYWAKKILEWTESPEVALETAI  
YLNDRFSLDGRDPNGYVGCMMWSICGIHQGWKEREIFGKIRYMNYAGCKRKFDPVAFVIKNMAKKK

>Pediculus\_hum\_XP\_002430545.1\_photolyase

MSDNSSQNSGKHTVHWFRKGLRLHDNPISLREGIKNSVTFRCVFVIDPWFAGSSNVGINKWRFLQCLEDLDRS  
LRKLNSRLFVIRGQPADTLPKLFKEWGTTNLTFEEDPEPFGVRDLNIMAMCKELGISVSVKSSHTLYKLEHI  
IEKNGGNPPLTYHQFTIIANIGPPPEPEETVTANLLEGSQTPLSDDHDNKYGVPTLEELGFETDKLKPTVWS  
GGESEALARLERHLERKAWVASFGHPKMT PQSLLASQTGLSPYLRFGLSTRLFYYQLVELYKKIKKAMPPLS

LHGQLLWREFFYCAATKNPNFDMNENPICVQIPWDENAQALAKWANGQTGFPPWIDAIMTQLREEGWIIHLLAR  
HAVACFLTRGDLWISWEEGMKVFELELLDADWSVNAGMWMWLSCSSFFQQFFHCYCPVRFGRKADPNNGDYIRK  
YLPILKNFPTKYIHEPWLAPETEQRAAKCIIGKDFPLPMVNHSIVSKINIERMKQVYRQLSKYRSQGT  
>Pelecanoides\_urin\_\_NXT31242.1  
RFLQLQSLLEDLNSLRKLNSRLFVVRGQPTDVFPRFLFKEWGVTRLTTFEYDSEPFQKERDAAIVKLAKEAGVEVV  
IENSHTLYDLDRIIELNGHKPPLTYKRFQAIISRMELPKKPVSTVTSQQMETCKVDIQENHDEVYGVPSLEEL  
GFPTDGLAPAVWQGGETEALARLDKHLERKAWVANYERPRMNANSLLASPTGLSPYLRFGCLSCRLFYRRLWE  
LYKKVKRNSTPPLSLYGQLLWREFFYTAATNNPKFDRMEGNPICIQIPWDRNPEALAKWAEGKTGFPPWIDAIM  
TQLRQEGWIIHLLARHAVACFLTRGDLWISWESGVRVFELELLDADFSVNAGSWMWLSCSAFFQQFFHCYCPVG  
FGRRTDPSGDYVKRYLPKLGKGFPSRYIYEPWNAPEVQKAAKCIIGVDYPKPMVNHAETSRLNIERMKQIYQQ  
LSRYRGLCLLASVPSCVEDLSGPVADSASGQGCSTSTAMRLSQADQASPKRKHEGAEEELCTEELYKRAKVTC  
LPAEIPGKSL  
>Pelecanoides\_urin\_\_NXT33719.1  
MPHRTIHLFRKGLRLHDNPILLAALESSEVIYPVYILDRKFMTSVMHIGALRWHFLLQSLLEDLQKNLCQLGSC  
LLVIQGEYESVLRDHIQKWNITQVTLDAMEPFYKEMEANIRRLGEEELGFEVLSLVGHSLYDTRKILDLNGGT  
PPLTYKRFLLHILSLLDGPEVPVRNLTAEDFQRCRPPPEGLAECYRVPLPVDLKIIPESLSPWRGGETEGLQRL  
EQHLTDQGWVASFTKPRITIPNSLLPSTTGLSPYFSLGCLSVRTFFYRLSNIYAQAKHSLPPVSLQGQLLWRE  
FFYTVASATPNFTKMAGNPICLQISWYEDAERLHKWKAQTGFPPWIDAIMTQLHQEGWIIHLLARHAVACFLTR  
GDLWISWEEGMKVFEELLLDADYSINAGNWMWLSSAFAFFHQYTRIFCPVRFGRKRTDPEGQYIRKYLPLKNFP  
SKYIYEPWTASEEEQKQAGCIIGQDYPFPMVNHKEASDHNLLQLMKQVREEQYRTAQLTR  
>Pelecanoides\_urin\_\_NXT34709.1  
MQHSSIHWFRLKGLRLHDNPALLAAADCHRLHPLFILDPSSTRTGTNARRFLLDALRDLGSLREIGSRLFVV  
RGCPEEVFPRLFRWRTRTLTFEVDTEPPARRRDTAVAEELAAHGVVIREVSHTLVDTERVLALNDGKAPLT  
YKRLQSLLASLGPPEKPAPALTREHLQGCRTPCQVSHDADFVPTLEELGQDPAEVGPHLYPGGETAALARLD  
AFMKRTAWVCGFKKPETEPTSLSPSTTVLSPYLKFGCLSVRTFWWRLEDEVYQGREHSRPPVSLHGQLLWREFF  
YTAGAGIPNFDPMVGNPVCLQVDWDDNPQHLRAWREGRTGYPFIDAIMTQLRTEGWIIHLLARHAVACFLTRGD  
LWVSWEEGLKVFEELLLDADWSLNAGNWLWLSGSAFFHRYFHVYSPIAFGKKTDRDGAYIRKYLPLVKDFPAK  
YIYEPWKAPRAVQERAGCLVGTHTYPRPIVEQR  
>Pelecanoides\_urin\_\_NXT35300.1  
KVDYDVCNYSNWNLYSAGIGNDPRDNRFNMKQGLDYDNGGDYVRLWVPELQAIKGADIHTPWALNSAALSQ  
AGVTLGETYPPQPVVTAREWSRHINQRPQGRSPHPRGRGPAHTPVQHKDRGIDFYFSRNKDI  
>Pelecanoides\_urin\_\_NXT37061.1  
MGVNAVHWFRLKGLRLHDNPALRECIQGADTVRCVYILDPWFAGSSNVGINRWRFLQLQCLELDANLRKLNSRL  
FVIRGQPADVFPRFLFKEWNIAKLSIEYDSEPFQKERDAAIKKLASEAGVEVIVRISHTLYDLDKIIELNGGQP  
PLTYKRFQTLISRMEPLEMPVETITPEVMEKCTTPVSDHDEKYGVPSLEELGFDTDGLPSAVWPGGETEALT  
RLERHLERKAWVANFERPRMNANSLLASPTGLSPYLRFGCLSCRLFYFKLTDLYKKVKKNSSPPLSLYGQLLW  
REFFYTAATNNPRFDMKMEGNPICVQIPWDRNPEALAKWAEGRTGFPPWIDAIMTQLRQEGWIIHLLARHAVACFL  
TRGDLWISWEEGMKVFEELLLDADWSVNAGSWMWLSCSSFFQQFFHCYCPVGFGRRTDPNGDYIRRYLPVLRG  
FPAKYIYDPWNAPEVQKAAKCIIGVNYPKPMVNHAESRLNIERMKQIYQQLSRYRGLGLLATVPSNPSGNG  
NGGLMGYSPPGESISGCGSTGAQLGTGDGHTVVQPCALGDSHTGASGIQQQGYCQASSILHYAHGDNQQSHLLQ  
AGRTALGTGISAGKRPNPEEETQSVGPKVQRQSTS  
>Pelecanoides\_urin\_\_NXT42939.1  
DNWAFLYAQRLLALQELPLHVCFLVPKFLDATIRHYGFMLRGLQEVAKECTELNIPFHLLLGAKDVLPAFV  
VEHGVGGLVTDFCPLRLPRQWVEDVRQQLPDDVPFAQVDAHNIIVPCWVASPKQEYSARTIRGKIHAQLPEFLT  
EFPFVIRHPYLPSCPAEPIAWEVCYSSLQVDRTVKEVEWATPGTAAGLAVLQSFIMERLKSFCSHRNDPNKAA  
LSNLSPPWFHFGQVSTQRAILEVQKHRGKYKESVDAFVEEAVVRRELAENFCYNNENYDSVQAYDWAQTTLKL  
HAKDKRPFLYDLQELEQGTTHDPLWNAQLQMVQEGKMHGFLRMYWAKKILEWTRSPEEALRFAYLNDRYEL  
DGRDPNGYVGKLQDGGCLWSICGIHDQGAERAI FGKIRYMNAYAGCKRKFDVQGQFERRYAPH  
>Pelodiscus\_sinensis\_XP\_006115758.1\_cryptochro  
MSNMLHRTIHLFRKGLRLHDNPILLAALESSEVVYPVYILDRKFLMSAMHIGTLRWHFLLQSLLEDLHRS  
LTKLGSCLLVIQGEYESVLRDHIQKWNITQVTLDAAIEPFYKEMEQAIIQALGGEMGFVDLSSMGHTLYDIRRIL  
DKNGGTPLTYKRFLLHILSVLGDPNAPVRNLTAEDFQRCRPPSALGLVEGYQVPRPEDLGI PQQSQSPWRGGESE  
GLQRLQHLKNQGWVASFTKPKTIPNSLLPSTTGLSPYFSLGCLSVRSFFYRLSNIYAQSKNHSLLPPVSLQ  
GQLLWREFFYTASATPNFTKMVGNPICLQINWYQNAEGLHKWRMAQTGFPPWIDAIMTQLHREGWIIHLLARH  
AVACFLTRGDLWISWEEGMKVFEEMLLDADYSINAGNWMWLSSAFAFFHQYTRIFCPVRFGRKRTDPEGQYIR  
KYLPLVTNFP SKYIYEPWTAPEEAQKQAGCIIGQDYPFPMVNHKEASARNLLQLMKQVREEQYGT  
AQLTRDDMDPMEMGLKHELSEENPKKGRARNREQT  
>Pelodiscus\_sinensis\_XP\_006124563.1\_cryptochro  
SLSYTQTAAADCLFPHHRFLQLQSLLEDLNSLRKLGLSCLFVVRGQPTDVFPRFLFKEWGVTRLTTFEYDSEPFQ  
KERDAAIIKLAKAKEAGVEVVIIENSHTLYDLDRIIELNGHKPPLTYKRFQTIISRMELPKKPVSSITSQQMEK  
CKSE

IQDNHDDTYGVPSLEELGFPTDGLAPAVWKGGETEALARLDKHLERKAWVANYERPRMNANSLASPTGLSPY  
LRFGCLSCRLFYYRLWELYKKVKRNNTPPLSLYGQLLWREFFYTAATNNPKFDRMEGNPICIQIPWDRNPEAL  
AKWAEGKTGFPWIDAIMTQLKQEGWIHHLARHAVACFLTRGDLWISWESGVRVFDLLEDADFSVNAGSWMWL  
SCSAFFQQFFHCYCPVGFGRRTDPSGDYVRRYLPKLKGFPSRYIYEPWNAPEQVQAAKCIIGVDYPKPMVNH  
AETSRLNIERMKQIYQQLSRYRGLCLLASVPSCVEDLSNPVTDSTAGQGSSTTTAQRLHCGQTSPKRKHEGI  
EELCAEELYKRAKVTGLHISEIPSKNL

>Pelodiscus\_sine\_XP\_014427726.1

IVVQKEDTWGTDIINAPLYFQVLHWAQNNADYIIPLYCFDPRHYLRTHYHGFPKTGPYRLKFLLSVKDLRQT  
LKKKGSNLVVRKGTPEDEVVHEFITQLGSVTAVAFHEEATTEELDVEKALQRVCAHHGVKIQTFWASTLYHRDD  
LPFISHISRLPDVYTQFRKAVESQGKVRPTVQADQLKPLAPGVEDGCI PMPEEFGLEKEPLADPRTAFPCSGGE  
TQALMRLQHYFWDNLVASYKETRNLGIDYSTKFAPWLALGCISPRYIYEQIRKYEKERTANQSTYWVIFE  
LLWRDYFRFVALKYGTRIFSLKGLQDKEVPWKKDKPLFDAWKEGRTGVPFVDANMRELAATGFMSNRGRQNV  
SFLTKDLGLDWRMGAEWFEHLLVDYDVCSNYGNWLYSAGVGNPRENRKFNMIKQGLDYDSNGDYVRLWVPEI  
QCIKGGEIHTLWALSNAALSQAGIALGETYPLPVVLAAREWSRHINQKPNKRDHPPRGKKDPSHTPKQHKKDRGV  
DFYFSRNKDV

>Pelodiscus\_sin\_XP\_025034720.1\_cry-1

MPITHGKRWISSKMKLPAEVHQEFGAMTTEGRTITRTALQASLDAVDSAARTMASGVVMYRGAWLQVSGIPPD  
VQTTVQDLFPDGLNYFRKINVGFLFFLLHRFLQLCLEDLDANLRKLNRLFVIRGQPADVFPRLFKEWNIAKLS  
IEYDSEPFGERDAAIKKLASEAGVEVIVRISHTLYDLDKIIEELNGQPPLTYKRFQTLISRMEPLEMPVETI  
TAEVMEKCTTPVSDDHDEKYGVPSLEELGFDTDGLPSAVWPGGETEALTRLERHLERKAWVANFERPRMNANS  
LLASPTGLSPYLRFGCLSCRLFYFKLTDLKYKKVKNSSPPLSLYGQLLWREFFYTAATNNPRFDMEGNPICV  
QIPWDRNPEALAKWAEGRGTGFPWIDAIMTQLRQEGWIHHLARHAVACFLTRGDLWISWEEGMKVFEELLLDAD  
WSVNAGSWMWLSCSSFFQQFFHCYCPVGFGRRTDPNGDYIRRYLPILRGFPAKYIYDPWNAPEIQKVAKCVI  
GVNYPKPMVNHAASRLNIERMKQIYQQLSRYRGLGLLATVPSNTNGNGNGGLMGYSPGENISGCSTTGGAQM  
GSNDGHTGGIQTALGDSHAGSSGIQQHGYSQGSSILHYAHGDNQQSHLLQQGRGTSTGISTGKRPNPEKETQ  
STGLKVQRQSTN

>Pelodiscus\_sin\_XP\_025039643.1\_LOW\_QUALIT

MNEGAAQAGSMKHCSIHWFRKGLRLHDNPALLAAMRDSRQLYPIFILDWFPKPMRVSVNRWRFLVESLRDL  
ESLKKLNRLFFVVRGRPMVEFPGLFKEWKVTRLTFEIDTEPYSRQRDAEVVRLAAEHGVEVIQKVSNTLYD  
RTIAENNDKVPLTYVRLQTLVAELGPPKRPVPAPTLENLKDCRTPCGDNHDAEYGIPTLEELGQDPTQAGPHL  
YPGGESEALGRDLHMNRATWVCNFQKQTEPNLSLSPSTTVLSPHLKFGCLSVRTFWWRLADVYQGRKHSSPP  
VSLHGQLLWSELXSRMEGTVPCLQVDWDDNPEHLRAWREGRTGYPFIDAIMTQLRTEGWIHHLARHAVACFLT  
RGDLWISWEEGQKVFEELLLDADWSLNAGNWQWLSASAFFHQFFRVYSPVAFGKKTDKDGEYIKKYL PFLRQF  
PAAIYIYEPWKAPRSMQEQAGCVIGRDYKPIVVEVSVKRNVERMKAAYARRSASTTAQLEGGSGKKGAKRKL  
PAAPSVAELLTKPKPKTS

>Pelodiscus\_sin\_XP\_025045251.1\_LOW\_QUALIT

NSGCVPPQRWKS DSCWARGDSALGWESERGCKVRCEIPAGGTDRLLATGNSSRRLQGNIPERLRKGGVSLFTD  
RFTPAGCCWEGWPELWLSLQLAGVAAGGCRSKARLPGRLPACLRGGAGRPGGGRAPPPRGRLTGKRKGKPV  
GAAAVAVEKRRKEGEVTEAGGAGCLGEAVRQARLRAAPSVQEFKYNNKRVRLVSQGPDLKEDAQGIVYWM  
SRDQRVQDNWAFLYAQRLALKQKLPLHVCFLVPXHFHFGMLKGLQEVAEECKELAI PFHLLVGFADVLPPFVTGR  
GLGGXGAPLRVPAQWVEDVRERLPGDVFPVQVDAHNIVPCWVASDKQEYGARTIRRKIHDLRSEFLTEFP  
PVIKHPYPPTAPAEPIDWSACRAGLQVDHTVKEVTWATPGTAAGLAMLESFIGERLKFFGTDRNNPNRAALS  
NLSPWFHFGQVSVQRAILEVRKHRGQCKESVEGFVEEAVVRRDAAESRCALARQELQTGAGFSLWRQPE  
STLSRGKPRPGPGRPHPRGSGFSSPPPELPGLPAGCGSPGCPRWALPRLQLQMVHEGKMHGFLRM  
YWAKKILEWTRSPPEALKFAYLNDRYELDGRDPSGYVGCMWSICGLHDQGWAERAVFGKIRYMNYAGCKR  
KFDVGEFERRYHPRKLGQ

>Penaeus\_mono\_\_XP\_037782690.1

MMTKTSVHWFRHGLRLHDNPALLESVKDAEFYAFIHDGETAGTEVSGYNRMQFLTEALYDLDAQLRAVGGQ  
LHIFKGKPADVIKMLHTEIRITRLTFEQDCEAIWNKRDNQVRNQCKELGIEIVEKISHTLWDPFEIIETNGGQ  
PPLTYEMFVQVSAVLGPPNRPVDPVNWNEVIFGEISDELAMKLQLCPIHTPGELGWNKECDEQSAYVGGETA  
ALAHQLKRLKVEENAFRDYILPNQVNPDLGEPMSMSAALRFGCLSVRKIFYWNIQDIYFELHKEIKPPFHS  
LTAQLIWREFFYCMSANNESYNMKGNPICIDIPWRKDDHQLQAWTEGRTGYPFIDACMRQLRKV

>Penaeus\_mono\_\_XP\_037784691.1

MISCSRSVGGRLKLQRNHFHQNVSKLREISSGKVTPGKMVSTNKSVAFCWLRLNDRYHDNEILTKANINADH  
VVPVYCFDPRHFKGTYHFGFPKTGPHRAKFLKESVEDLKATLRNRGSDLIVRFKPEEVL PFLIKSVAATTSH  
LVFQEEVTKEEKDVERSVRDRCKDAGVNVHSFWGATLYHKTDLFPFIDKVPDITYTNFRKAVEAQSRVRGVCNM  
PDKLKPLPENLDVGEIPTLSKLGVEELPMDHRTAFPFAGGETAGLARVKNYLWDTNNVANYKETRNLGGEAY  
STKFSPLAHGCLSPRYIFNEIKKYESQVRANKSTYWVIFEMIWRDYFRFVCMKFGDRVFYPSGIMGKKVQWK  
RNAQLFEMWKGKVKEIVIGILVYGVGGLCLCYLLDFCLFXLDHVCVSNYGNWNYAAGIGNPRENRKFNMIK

QGLDYPDPEGNFIRVWVPELKNIKNGRIHTPWKMNIAELTNAGVSIGEDYPKPVVVAPEWGRHDHKMNNNSNSNK  
KQKGNWMPGQKRGIDFYFSGNRK

>Penaeus\_mono\_\_XP\_037785843.1

MSLLVNIHRTFQVIDRFSRGFIRSRTLNI STFYKVCN IQCRDFASIRSMASDEPTPKKAKIDDDALNIHKRL  
KKERYEEAEDVSDFKFNKKRVEVISKEGEVPDDCDGIVYWMSRDQVRQDNWALLFAQRLALKNKVSLHVVFCL  
VPKFLDATIRHFHFMRLGLEEVEKECKELNIEFHLLLGAEKDVLPFTFIKENKIGGLVTD FSPLRVPQQWLKDV  
KKAIPSSIPMCKVDAHNI VPCWITSDKQEYSARTIRKKI HDKLPKFLTKFPPVAKHRYTSKYKSEGVDWVEAE  
KSLEVDQTVKVPDWATPGTRAGLDLLNEFCLKRLRK FADSRNDPTINALSNLSPWIFHGQISAQRCVLEV KRY  
SKQLSKSVEAYVEEA VVRRELSDN YCFYQKNYDKLDGAYEWARKTLEDHRNDKRPYVYTRETLEEGKTHDELW  
NSAQIQLVTEGKMHGFLRM YWAKKILEWMKSPDDSLATAIYLNDKYSLDGRDPNGYVGC MWSICG IHDQGWGE  
RQVFGKIRYMNYDGCKRKFKIDAYVARYGGKKHKYIPAV

>Penaeus\_mono\_\_XP\_037792362.1

MTGKVNEPRPKHMHVWFRKGLRLHDNP SLRAGLRNAATFRCIFILDPWFAGSSNVGINKWRFL LQCLEDLDSS  
LRKLNSRLFVIRGQPADVLPQLFREWGTTCLTFEKDPEPFGKARDANIVAIAREMGVNVVMKTSHTLYKPEKI  
IEKNGGKPPLTYKSFQNILMNM DLPLPQGTITSEEVEDKQTPISDDHDEKYGVPSLEELGFDTEQLQQTVWK  
GGESEALTRLEHHLERKAWVASFGRPKMTPQSLYPSRTGLSPYLRFGLSCRRFFMELNELYRKIKKSPPPLS  
LHGQLLWREFYYTAATNPNKFDHMEGNPICVQIPWDKNPEALAKWANGQTGYPWVDAIMTQLRTEGWIHNVAR  
HAVACFLTRGDLWVSWEEGMKVFE LLLDADWSVNAGSWMWLSCSSSFFQQFFHCYCPVRYGRKADPN GDFIRT  
YLPVLKNFPTKYIHEPWTAPESVQRAAKCII SRDYPMPMVDHIKQSQNNIERMKQVYQQLVHYRGTIHPA IKS  
PKVDHYPPPPPDY EKPRSNGKNDIQRDSNYRVQVQA

>Penaeus\_mono\_\_XP\_037792441.1

MTTIHWFRKGLRLHDNPALLAAIDESKELRPVFVLD PWFVRESRTGVNRWRFLAQT LVDLDTSLKQLGSRLFV  
VRGKPEEVFPKLFKEWNVEKMTWEVDTEPYARIRDEKIEKLSKEHGKVVCKVGH TLYDTEKII RTNLGKTPM  
TFQGLEGVLKKIGPPPKVVDKPTSLPEGCKISSEVAADPKYDPPTLKD LGVVESDLEPCLYPGGETEALKRLE  
KYMERSWVRSFEKPKTSPNSLQ PSTTVLSPYLKFGCLSCRTMYRLLLEVYGSKPSQIAQESLLGQLTFREMF  
YTVGATTANFDQMEGNSICRQIPWKRDEKMLEAWEY GKTGFPFIDAIMTQLRKEGWVHHLARH AVACFLTRGD  
LWQPWEDGMKVFEELLLDADWSLNAGNWMWLSASAFFHRYFRVYSPIEFGRKTDPHGDYIRKYIPKLKKFPDN  
YIYEPWKAPLSVQKAAGCII GQDYPRPIVDHQKAREENLKR MGQAYQADENANVGPLDIQSVEVIVRE

>Penaeus\_van\_ROT83202.1\_putative\_c

MAKVREDSKKRDSRFTFCSPSARGTSHVTLR APSGTAPRKGGGGRGREGGDGRRRNSLTQTRRGGRKDCIL  
ARLVPRARLSMTTIHWFRKGLRLHDNPALVAAIDENKELRPVFVLD PWFVRESRTGVNRWRFLAQT LVDLDT S  
LKQLGSRLFVVRGKPEEVFPKLFKEWNVEKMTWEVDTEPYARTRDEKIEKLSKEHGKVVCKVGH TLYDTEKV  
IRTNLGKTPLTTFQGLEGVLKKIGLPPKVVD RPTSLPEGCKISSEVASDPKYDPPTLKD LGVVESDLEPCLYPG  
GETEALKRLEKYMERSWVRSFEKPKTIPNSLQ PSTTVLSPYLKFGCLSCRTMYRLLLEVYGSKPSQIAQESL  
LGQLTFREMFYTVGATTANFDQMEGNAICRQIPWKRDEKMLEAWEFGKTGFPFIDA IMIQLRKEGWIHHLARH  
AVACFLTRGDLWQPWEDGMKVFEELLLDADWSLNAGNWMWLSASAFFHRYFRVYSPIEFGRKTDPHGDYIRKY  
IPKLKKFPDNYIYEPWKAPLSVQKAAGCII GQDYPRPIVDHQKAREENLKR MGQAYQAGK

>Penaeus\_van\_XP\_027213306.1\_cry\_DASH-1

MISCSRSVGGRVLLKLRNHFHQNVTKLREASSIKVTPGKM VATNKSVAFCWLRNDLRYHDNEILTKANINADH  
VVPVYCFDPRHFKGTYHFGFPKTGPHRAKFLKESVEDLRATLRNRGSDLVVRIGKPEEVL PFLIKSVAATTSH  
LVFQEEVTKEEKDVERSVRDRCKDAGVNVHSFWGATLYHKTDLPFPINKVPD TYTNFRKAVEAQSRVRGVCNM  
PDKLKLPLPENLDLGEIPTLSKL GVEELPMDQRTAFPFSGGETSGLARVKNYLWD TNNVANYKETRNGLLGEAY  
STKFSPLAHGCLSPRYIFNEIKKYESQRVANKSTYWVIFEMIWRDYFRFVCMKF GDRVFYPSGIMGKKVHWK  
RNAQLFEMWKDGR TGVPFVDANMRELKETGWM SNRGRQNVASFLLKDLGLDWRLGA EWFESQLLDHDVCSNYG  
NWNYAAGIGNDPRENRKFN MVKQGLDYPDPEGNFIRVWVPELKNIKNGRIHTPWKMNIAELTNAGVSLGEDY PK  
PVVIAPEWGRHDHKMNNNSNSNKKQKGSWMPPGQKRGIDFYFSGNGK

>Penaeus\_van\_XP\_027216548.1\_cry-1-like

MTKTSVHWFRHGLRLHDNPALLESVKDCEKFYAFI FHDGETAGTEVSGYNRMQFLTESLCDLDEQLRAVGGQL  
FVFKGKPTAVIKMLHAEIGITRLTFEQDCEAIWNKRDNQVRSQCKELGIEIVEKIAHTLWD PFEI IDCNGGQP  
PLTYEMFVQVSAVLGPPERPVDPVKWDDVIFGEISDELAMKLQLC PHIPTPAELGWNRECDEQ SAYIGGETAA  
LAHLQKRLKIEENAFRD CYILPNQVNPDI LGEPMSMSAALRFGLSVRKFYWNIQDIYFELHKEIKPPFHS LT  
AQLIWREFFYCMSANNEAYNRMKGNPICIDI PWRKDDEHLKAWTEGRTGYPFIDACMRQLRKEGWIHHVCRTA  
VACFLTRGDLWISWEDGLHVFLKYLIDADWSVCAGNWMWVSSSAFERQLDCSTCICPVNYGKRIEPTGDYIRR  
YVPELASLPQDYIFEPWLAPKS VQEAYKCII GQDYPERIVIHA EASKANRKMME SIREKMAVKPPHCCPSNVK  
ETRVLRLPEACYHNVL

>Penaeus\_van\_XP\_027226418.1\_cry-1-like

MTGKVNEPRPKHMHVWFRKGLRLHDNP SLRAGLRNAATFRCIFILDPWFAGSSNVGINKWRFL LQCLEDLDSS  
LRKLNSRLFVIRGQPADVLPQLFREWGTTCLTFEKDPEPFGKARDANIVAIAREMGVNVVMKTSHTLYKPEKI  
IEKNGGKPPLTYKSFQNILMNM DLPLPQGTITSEEVEDKQTPISDDHDEKYGVPSLEELGFDIEQLQQTVWK  
GGESEALTRLEHHLERKAWVASFGRPKMTPQSLYPSRTGLSPYLRFGLSCRRFFMELNELYRKIKKSPPPLS

LHGQLLWREFYYTAATNNPKFDHMEGNPICVQIPWDKNPEALAKWANGQTGYPWVDAIMTQLRTEGWIHNVAR  
HAVACFLTRGDLWVSWEEGMKVFEDELLLDADWSVNAGSWMWLSCSSFFQQFFHCYCPVRYGRKADPNGDFIRT  
YLPVLKNFPTKYIHEPWTAPESVQRAAKCIIISRDYPMFMDHIKQSQNNIERMKQVYQQLVHYRGTIHPAICS  
PKVDHYPPPPPDYKPRSNKNGKNDIQRDSNYRVQVQA  
>Penaeus\_van\_XP\_027232396.1\_photolyase  
MTEAEDVSEFKFNKKRVEVISKEGEVPDDCDGIVYWMSRDQVRVQDNWALLFAQRLALKNKVS LHVVFCFCLVPKF  
LDATIRHFHFMRLGLEEVEKECKDLNIEFHLLLGAEKDVLPFTFIKEHKIGGLVTDFSPRLVPRQWLKDVKKAI  
KPNVGLLQVDAHNI VPCWITS DKQEYSARTIRKKIHDKLPKFLTKFPVAKHRYTSKYKSKGVDWVEAEKSLE  
VDQTVKPV DWATPGTRAGLDLLNEFCLRLRKFAESRNDPTINALSNLSPWLHFGQISAQRCVLEV KRYNKQL  
SKSVEAYVEEAVVRRELS DNYCFYQKNYDNLDGAYEWARKTLEDHRNDKRPYIYTRETLEEGKTHDELWNSAQ  
IQLVTEGKMHGFLRMYWAKKILEWMKSPDDSLATAIYLNDKYSLDGRDPNGYVGCMWSICGIHDQGWGERQVF  
GKIRYMN YDGCKRKFKINAYVARYGGKQHRYIPPV  
>Penelope\_pile\_\_NXC39494.1  
DNWAFLYAQRLALKQELPLRVCFCLVPEGRDATLRHCAFMLRGLQEVAEECAELDVPFHLLLGCPRDVLP TLV  
AQHGVGGLVTDFCPLRIPRRWVEEVRELRPEDVPFAQVDSHNIVPCWVTSPKQEYSARTIRGKIHSQLPEFLT  
EFPPVVRHPPHPLPGPAEPIAWDACYSQLQVDRTVTEVAWATPGTTAGLAVLQSFITERLEAFGSQRNDPNKAA  
LSNLSPWFHFGQVSTQRAILEVQKHRRAYKESVDAFVEEAVVRRELAENFCYNEHYDSVQ GAYDWAQTTLKL  
HAKDKRPFLYELPQLEQAATHDPLWNAQLQMVQEGKMHGFLRMYWAKKILEWTRCP EEALHFAIYLNDRYEL  
DGRDPNGYVGKLGGMGLWSICGIHDQGWKERNVFGKIRYMN YAGCKRKFDVDQFERRYAP  
>Penelope\_pile\_\_NXC41228.1  
MPHRTIHLFRKGLRLHDNPALLAALQSSDVLYPVFI LDRAFLTSSMHIGALRWHFLLQSLEDLQNSLRRLGSC  
LLVIQGEYGAVVRERVQEWSITQVTLD AEMEPFYKEMEANIRGLGEEMGFVLSLAGHS LYDTERILELNGGT  
PPLTYKRFLHVL SLLGDPEVPVRNLTAEDFQRCSPPEPGLAERYGVPLPADLKLPPESISPWRGGESQGLQRL  
EQHLADQGWVASFTKPR TIPNSLLPSTTGLSPYFSMGCLSVRSFFYRLSNIYTQAKHHS LPPVSLQGQLLWRE  
FFYTVASATPNFTKMAGNPICLQISWYEDAERLHKWKTAQTGF PWIDAIMTQLRQEGWIHHLARHAAACFLTR  
GDLWISWEEGMKVFEELLLDADYSINAGNWMWLSASAFFHQYTRIFC PVRFGRRTDPEGQYIRKYL PVLKNFP  
SKYIYEPWTASEEEQKQAGCII GQDYPPFPMVDHKEASDHN LQLMKRVREEQHRTAQLTRDDADDP MEMKLKRD  
RSEEDITGAKAARMAE  
>Penelope\_pile\_\_NXC42041.1  
CIYILDPWF AASSAVGINRWRFL LQSLLEDLNSLRKLN SRLFVVRGQPTDVFPRLFK EWGVTRLTFEYDSEPF  
GKERDAAIVKLAK EAGVEVVIENSHTLYDL DRI IELNGNKPLTYKR FQAIISRMELPKKPVSSIVSQMETC  
KVDIQENHDDMYGVPSLEELGFPTDGLAPAVWQGGETEALARLDKHLERKAWVANYERPRMNANSL LASPTGL  
SPYLRFGCLSCRLFYYRLWEL YKKVKRNSTPPLSLY GQLLWREFFYTAATNNPKFDRMEGNPICIQIPWDKNP  
EALAKWAEGKTGF PWIDAIMTQLRQEGWIHHLARH AVACFLTRGDLWISWESGVRVFEDELLLDADFSVNAGSW  
MWLSCSAFFQQFFHCYCPVGFGRRTDPSGDYVKRYLPKLKGFP SRYIYEPWNAPESVQKAAKCIIGVDY PKPM  
VNHAETSRLNIERMKQIYQQLSRYRGLCLLASVPSCVEDLSGPVTD SASGQGSSTSTAIRLPQSDQASPKRKL  
EGAEELCTEELYKRAKVTGLPAPEIPGKN  
>Penelope\_pile\_\_NXC44637.1  
RFLQCLLEDLDANLRKLN SRLFVIRGQPADVF PRLFKEWNI AKLSIEYDSEPF GKERDAAIKKLASEAGVEVI  
VRISHTLYDLDKIIELNGGQPPLTYKR FQTLISRM EPLEMPVETITPEVMEKCTTPVSDDHDEKYGVPSLEEL  
GFDTDGLPSAVWPGGETEALTRLERHLERKAWVANFERPRMNANSL LASPTGLSPYLRFGCLSCRLFYFKLTD  
LYKKVKKNSSPPLSLY GQLLWREFFYTAATNNPRFDKMEGNPICVQIPWDKNPEALAKWAEGRTGF PWIDAIM  
TQLRQEGWIHHLARH AVACFLTRGDLWISWEEGMKVFEELLLDADWSVNAGSWMWLSCSSFFQQFFHCYCPVG  
FGRRTDPNGDYIRRYLPVLRGFP AKYIYDPWNAPESVQKAAKCIIGVNYPKPMVNHA EASRLNIERMKQIYQQ  
LSRYRGLGLLATVP SNPNNGNGGGLMGFSPGESVSGCGSTGGFFSSLLGAQLGTGDAQTAGVQTCALGDSHT  
GASGIQQQGYCQASSILRYAHGDNQQSHLMQAGRTSLGTGISAGKRPNPEEETQSVGPKVQRQSTN  
>Penelope\_pile\_\_NXC46129.1  
QPISPAFSSVLKVDYDVCSNYGNWLYSAGIGNDPRDN RKFNVIKQGLE YDGN GDYVRLWVPELQGIKGADIHT  
PWALSSATLSRAGVTLGETYPQPVVTAPEWSRHISQR PQGGS PHPQGRRGPAHTPMQCKDRGIDFYFSRKKDL  
>Penicillium\_sub\_OKP02382.1\_cry-1  
MKSGSASNIVLYWHRTDLRLHDS PALHAALALEPSVFI PVWTTWDPHYVYRARVGP NRWRFLLECQSDLSKSY  
TKLNPKQKLWL VREAPQTVLPKLWKKWGITHLVFEKDTDPYARERDEAIVRLAEEAGVEVVVRMGRTLDFD DD  
LVRKNGGKPTMSMAQTEKAAEKINRGQPD RPVETPKSVPDAWAKDKMDLSDIEHEFANPTPD LNADHRGSKDK  
QYSQIMGPNNDFGVPTMEEIGIDPALATT PHRGGESVALKMLADHISNEEYIGTFE KPKTSPA AFEPQATTLL  
SPYLHFGSLSVRKYWWDVQDVM TKRRKANQPNAFVPVNLPGQLLFRDMYFAAQAAVGAPYARVHG NKIVRFID  
WHLQSKPHRPAEKDGEALPERDYEVDSPEAEWFQRWKTGRTGF PWIDALMRQLRSEGWIHHLGRHSVACFLT  
RGGCYVSWERGAEVFEELLIDHETSANAGNWMWLSCTAFFA QFYRCYSPIAFGKKWD PNGDFIRRYVPELAKF  
DKKFIYEPWKAPIADQKKWGCRVTNDDSAAGGQSYPKPMFDFDKRRQICLDSMKNAYDVGLHGND EQVLDGSW  
RKLFGENGGGEEPKKKRQRTGDEDE  
>Penicillium\_sub\_OKP10124.1\_photolyase

MSNSNGDSSPKTAPESKKAKPQDLRQPHPNAQQTEEFQIVLRDFYPPEMSNDRCKAYNDGTIERPIDTLEKAC  
KDTADKRRVTPGKAVVHWFKTDLRLQDNRALSTAFQIAKDNQIPVIGVYIVSPEDFEAHLTSPARVDFTLRT  
LKQLQKDLSELDIPLYVETQEKRNIPTRIVELCQQWEAKHLCANLEYEVDELRRDAKVVRRCADHDIDFTPS  
HDTCVVTPLGLITGAGKQYAVYTPWFRSWLRLKENPDYLEMSEDPGTNPGDARKQFADLFDCIKPDMPPSSKS  
LSEKEKKRFEELYPAGEHEATRLEKFLKEKCGDYDKNRSMLPGENTSALSPYFASGAISARTAVVTAKRANK  
NHLDRYDQGHMTWISSEVAVRDFYRHVLVHWPFIWYGVLYLLPPPSIHSRKSLTDPPSMNKCCKPEATNIEW  
EYDADQFQAWSEGKTGFPIVDAAMRQLKHCAMMHNRTRMVSSFLSKDLMIDWRRGERFFMEHLIDGDFASNH  
GGWGFSSSTGVDPQPYFRIFNPLRQSERFDPDGEYIRHWVPELRDVKGNAIHEPYSRGAGAIQAQNGYPRPIV  
EHAASRDALARYKSALQG

>Periophthalmus\_magn\_\_XP\_033823666.1

MLREVLVGREDPEGFFALCVSVLGHHDTRAQFLTIVIRPLSTANMSLHSALTAIYEEYFSNNEDDELQLAMALS  
LLDAEETTTATKQSTTQEVIIQSPPAEDASTVQNKTVPMTDNSFRPSSLTQKHIYEPKRSKRRRQRSKSGSQQ  
VVGLPTAPSPQPPVLLWFRDLRLCDNPGMIGALEVGAPVPIPVFIWAPEEEEEGP GTTVAMGGACKFWLHQALS  
CLHTSLQRISSSLVFLKADSGSSSLQTLRGLLQETGARTVVANALYEPWLKQRDDLVLVSALHKDGIDLRMYHSY  
CLRDPYSVSTVGVLGRIGISVSHFISCKQNPGPTLGAPLDPPVSLPTPSHWPSGVPLDMLELARMPPRRKDGT  
IIDWAANIRKSWDFSEEGAHAQLETFLQNGVYRYEKESGRADCCNTSGLSPYLHFGQLSPRWLLWDAKGAKCR  
PPKFQQRKLSWRDLAYWQLSLFPDLPWESVRPPYKALHWSNRSHLKAQQRGTGYPLVDAAMRQLWLSGWMNN  
YMRHVVASFLIAYLHLPWQEGYRWFQDTLVDADVAIDAMMWQNGGMCGLDHWNFVMHPVDAAMTCDPCGSYVR  
QWCPHELADLPDELIHKPWKCPTSMKLRAGVVLGQSYPERIITDLEEHRQSLKDVAQVRLQFKQYVDRATGCD  
LVPLPPRLVSEALGIHGDVEVRGKQFLLPLITRMEFKHQVEEPDSDAGSNPYNVAVLKGYVSRKRDETI AFLNE  
RDTASVMNEGVQRRERMDVNYRKMEGLPQVRQPRGRARRTP TAKDKFSIVPGGVVSTLR

>Periophthalmus\_magn\_\_XP\_033823679.1

MVVNSVHWFRLRLHDPALQEAALNGADTVRCVYIILDPWFAGAAVGINRWRFLLEALEDLDNSLKKLNSRL  
FVIRGQPTDVFPRLFKEWNVTRLTFEYDPEPYGKERDGAIIKMAQEFQVETLVRNSHTLYNLDRIIEMNNNNP  
PLTFKRFQTIVSRLELPRRPLPPIITPQQMDKCHTKISDNHDQLYNIPLSLEELGFRTEGLPTAVWRGGESEALE  
RLNKHLDKKVWVASIEHPRVSTCSLYASPTGLSPYLRFGCLSCRVLYYNLRELYMKLRKRCSPPLSLFGQLLW  
REFFYTAAATNNPNFDRMEGNPICVQIPWDQNPEALAKWAEGRGTGFPWIDAIMTQLRQEGWIHHLARHAVACFL  
TRGDLWISWESGMKVFEELLLDADWSVNAGSWMWLSCSAFFQQFFHCYCPVGFGRRTDPTGDYIRRYIPIILKN  
YPNRYICEPWNAPESVQKAANCVVGVDPYKPKMINHAEGSRNLNIERMKQVYQQLSHYRGLSLLASVPTIQEEAE  
PPMTDESQTSSGPDSPHKPPDIEAAGCSTAPDSSTTDLSTFSATVPYTALGDTPCPQNEPPTAISSTSTDPMT  
AQPKPSSPASPCPNVAPSPGRTTSLGPRRKGMARKARRSHRQVRVQNCATATKEGDRRTDEESRDSTAAEDKM  
EEEIEQDDEKMEEEMHGGESPGYQQ

>Periophthalmus\_magn\_\_XP\_033823696.1

MVVNTIHWFRKGLRLHDAALRDSIRGSDSLRCIYIILDPWFAGSSNVGINRWRFLQLCLEDLDASLRKLNSRL  
FVIRGQPTDVFPRLFKEWQINRLSYEYDSEFPFGKERDAAIQKLASEAGVELMVRISHTLYNLDKIIELNQGP  
PLTYKRFQGLINHEAVELPAETITADVIRTCLTPIISDDHDDKYGVPSLEELGFETEGLTAVWPGGETEALM  
RLERHLERKAWVANFERPRMNANSLASPTGLSPYLRFGCLSCRLFYFKLTDLYKKVKKNSTPPLSLYGQLLW  
REFFYTATNNPCFDKMDGNPVCVQIPWDRNREALAKWAEGRGTGFPWIDAIMTQLRQEGWIHHLARHAVACFL  
TRGDLWISWEEGMKVFEELLLDADWSVNAGSWMWLSCSSFFQQFFRCYCPVGFGRRTDPNGDFIRRYLPILRT  
YPAKYIYDPWNAPEDVQKAAKCIIGLHYPKPMVNHAEASRNINIERMKQIYQQLSSYRGLGLLATVPANLSIGT  
NGNGQGPGGSVVEEPSVLEGAPRTERTQATQKRRHEEPLTEGSAKSWRQSK

>Periophthalmus\_magn\_\_XP\_033838200.1

MSQKRKATTDAGAEKPSKKPNLTFEKKADGWLQEQVLQQRAAKKEMKFNNKKRLRFLTDTQKLKQGAEGVLYWM  
NRDQRIQDNWALIHAQRLALKEALPLHVCFLVVPKSKLSTYRHFSFLLKGLEEVSQELKTLGVEFHLLHGPP  
GDVLPGFVSDRSLGVVVTDFSPLEPLQWLEDVKKKLPKDIPFIQVDAHNIIVPCWEASPKLEYAARTIRGKIN  
KVLSEFLTEFPLVEKHPHTATRTAKQVDWVKELESQVQDKTVGETEWAKPGMKAGMAMLESFIDVRLKLFQAAQ  
RNDPNAAALSQSPWIRFGQISAQRVALQVKKKGGESAAPFIEELVVRRELTDFNFCYNNKKYDSVEGAYEWAQ  
KTLKDHAHDKRPIVYTRDQLEKAKTHDKLWNGAQFQMVSEGMHGLRMYWAKKILEWTSSPGEALSIALYLN  
DRYSLDGQDPNGFVGCMMWSICGIHDQGWAERPIFGKIRYMNYKGCQRKFDVARFEKKYCPKDL

>Periophthalmus\_magn\_\_XP\_033841635.1

MSTARTIICLLRNDRLRLHDNELFHWAAQRHAEHVVPVLYCFDPRHYEGTYNPNFPKTPGFRRLRFLLDTIKDLRNT  
LVSKGSNLIVRQGPEDVVADLIKQLGTSTVAFHEEVTSEELTVEKNVKSVCQAQMKVKVQTCWGSTLYHRDD  
LPYNHISRLPDVYTQFRKAVESQSSVRPVFPTPEKLPKPIPPGLQEGAIPTAEDLKQTEPIDDPRSAFFPCRGE  
SEALARIKHYFWDटनावायकेत्रनग्लिगव्दयस्तकलपलालगसिप्रयियहोिकेतयैतर्तानोस्तयविवे  
ल्लवर्दयिर्दयवयिग्नोमहिग्लोन्कस्वपक्कड्मक्लेनवकेगर्तग्वपवदानमरेलाम्तग्वमस्नर्गर्गव  
सफ्लत्कड्लग्लवर्माग्वेयल्लिदयद्वसन्ग्नव्यसग्वग्नदप्रेनर्कन्मिक्ग्लदयद्वन्गेवर्ग्वपेल  
क्वािर्ग्सद्वहत्पत्तलस्ताल्शाक्वस्लगैत्यप्विपिविापेव्सर्हमन्कक्पग्गसग्गस्सर्गक्कग्पशत्पक्हक्द्र  
गिदयिस्फग्गक्ग्व

>Periophthalmus\_magn\_\_XP\_033845754.1

MSHTCIHWFRKGLRLHDNPALIALGLKDCKEYLPVFVLDPYLYNKAFLNLRWRFLIGSLRDLDCSLKKLNSRLF  
IVRGEPKDVFPTLFKKWKVSKLTYEYDTEPYSLSRDQTVTELAKHEHGVVEVIYKVSHTLFDINRIIEANNGKPL  
LTYKRMQAIIVSDLGSPKKPIPAPTVNDIKYTSTPSSKDHEEKFGVPTLDELGHDIASISEELFPGGVEVEALKR  
LDEHMKRTQWVCNFEKPQTSPLMPSTTVLSPYVTFGCLSAFTFWWRLAEVYQGKKHSSPPVSLHGQLLWRE  
FFYTASLGIPNFKMKDNPVCTQVDWDNNPEFLAAWREARTGFPFIDAIMTQLRTEGWIHHLARHAVACFLTR  
GDLWISWEEGQKVFEELLLDGDWALNAGNWQWLSASTFFHQFFRVYSPVAFGKKTDKNGDYIKKYLPLLKKFP  
PQHIYEPWKAPRSVQQAAGCIIGKDYPKPLVEHEVVRKKNIQRMTLAYAKRSADKSESPPSKQGVKRKAPSVV  
DMLNKKAKQK

>Periplaneta\_ame\_AGE89265.1\_cry\_2

MSEESAKHTVHWFRKGLRLHDNPRLREGLKCASTFRCVFILDWPFAGSSNVGINKWRFLQLQCLELDQSLRK  
LNSRLFVIRGQPADALPKLFKEWGTNTLTFEEDPEPFGRVRDQONIMAMCKELGITVISRVSHTLTKLESII EK  
NGGKAPLTYHQFQTVVASMGSPPPAEPTITSKYINGAYTPIGEDHDDKYGVPTLEELGFDXEGLLPPVWQGGE  
TEALARLERHLERKAWVASFGRPKMTPQSLLASQTGLSPYLRFGLCLSTRLFYYQLTDLYKKIKKACPPLSLHG  
QLLWREFFFYCAATKNPNFDMNGNPICVQIPWDKNAEALAKWANGQTGFPPWIDAIMTQLREEGWIIHHLARHAV  
ACFLTRGDLWVSWEEMKVFEEELLDADWSVNAGMWMWLSCSSFFQQFFHCYCPVRFGRKADPNGDYIRKYLP  
VLKNFPTRYIHEPWNAPESVQKAAKCIIGKEYSLPMVNHAVASRINIERMKQVYQQLSKYRGPGLLATVPTSQ  
SQSSANLNPISTQKEYKKSSPENKWETSSDNEINCHSPSYRENIKSGIHFHRFQQHSQKQNRDCE

>Perkinsela\_sp.\_KNH05154.1\_DNA\_photol

MNSFHFISIPLISAEMKNVLLWFGHLHDLRLHDHYALKLACRKAQRTGGCVYPFFCFDLRKFAAASDLCEFFMAH  
PRRAIFVKECIEDLRSSSLNDLNQQLWVRTGYVENILPDLAEKLNCSDFIAHELHSPEDIAIRLKVENKIRERD  
RAVNLRLAWGSTLIHIDELDAPVSDFPFIEFSRYQDFFHRKKVVRTDGFNCRTPGGFPPQNPTGGDIPPAGTIP  
SLEDLGYRQQADVITYDARGVLDFTGGETAGCQVRVTFDRKIIENYSPGFAERERARLYKQRSSHLSPWISHG  
CVSPRRVYELVLKYSHEQRGTDWECKSFIMMLVRRDYWYFLSKRFGARLRAPEGPTPSACAIEPPRAGWRLD  
PPLIARWCAGVTGVPFVDAAMRELTLTGFSQAQCRALLWFLVRGLQDQDWRVAAEFQRTLIDYDPHTCWGNC  
AYYSGLMFDIGTRMPLHTAEHHHLQFDGSGVFTRLWLPELHNVPYFLHRPHAMTKHMQEIHNARLGVDYPVP  
MKLWFDVEKDVSVFVSKLPNYITAENSKLIGEGTAFGLGVVTEREKTLLHLSR

>Perkinsus\_mar\_XP\_002773871.1\_photo-lyas

MSREIRSMNDWALLYAQNLALLEGKQPLLVVYNLAIGYLGGLRQHVFKVGGRLVLAKNLRDKGISFRVDYSKD  
FPKALSKMVTMLGCSHVVTDFTPLKVNKAWEDAFIKEAERLGIRFDQVDAHNIVPCWVASDKLEYAARTIRPR  
LWRNWDTYSTEFPTLHKHPYHYDGAHFEITSEACFDMLLSDNEQQLLAGLDHGKVPVTKVLPGEDAGLEHLYT  
FIKNMKGYSQFRNDPTKNAISDLSPYFHYGMVSPQRAVMEVAKAKSIKPDRAFIIEAFIRRELADNFCYYN  
ENYDRFEGFHNWAQKTLQDHEADKRKYVYLSQLEKASTHDELWNACQNQMLKSGKMHGYLRMYWGKKILEWT  
ENPRQALKFAIYLNKDYELDGRDPNGYVGCWWSIGGIHDQGWAERPFIHGKIRYMTYDGCKRKFIDIKYINKWG  
GIKEGKDDDNYGKAYLKKRSTTDGESSNAASKRSKIITSLQ

>Perkinsus\_sp.\_TEB20199.1\_C9890\_0096

MFHGDTVQVLTSLHGICKFQHFICNRDFTVFAQERDRKIHWCRCNSVTYVDCEDYDIVPSDRVLMNEGAPEA  
RPYTVLSHYFNKFTKDVYTNKALARRPVSESIISTSTFFRESLQMENYSLYNKDDLKSKLYTKKTTLIQQGGRH  
GLSSLSRVDVSWQKYSNDRHYPGKQEATTRMSAHLKFGTVSIREFFYKVVDASGGSLQSDLLREVVFERSFYK  
IWRHPTLQRDVSFHHQIDDIQIPWRYPKDSAKDWEAWTLGMTGFPMADAGMRQLEVEGYVHGRPRMVLATVAT  
RYLLFDWRECARFFATKLTIDYDPIILNAAAGWGFSSSLGENAQNVWRAPMNPQLQSRNYDPECEYIKRWIPELKS  
VSVKDIHDWMSITLRLTHLNQ

>Petromyzon\_mari\_XP\_032801146.1

MLVGAFCSRYRTQRRERALLQPPSSAFRIDLIAKSSRYQNCPRGRVGPRLAAAIIVVCVCVCVCVWRSCTRLIS  
ILLCTSSNGSLPTMATTSKQPIPTKKTEPELSNIGALPETS GGPPSKKPKVGATSKESDAGTTAAPTGSNGFE  
EQISKTRAAALASSVLEFRFNKKRVRAVSNADDMAANASGILYWMSRDQRVQDNWALLYAQRLALKQRLPLYVC  
FCLVPKFMDATIRHFGFMLRGLQEVEKEFRSLDISFHLLKGYAKDVLPPFVNEKNIGAVVTDFLPLRVPRQWV  
KDLKKALPKNVPLAQVDAHNVPCWVTSKLEYGARTIRRKIHDKLPQFFTEFPFAIKHTYPAKSLPEETDWE  
AAWQSLEVDRSVGEVAWAQPGTSAGLEMLNSFINERLKLFTDRNNPNNSNALSNSLPWIFGQISVQRCALV  
SKLKPKYRESVDYIEEAIVRRELGDNFCFYNNKYDSLGDGAYDWAKRSLDAHTQDNREYIYSLQQLLEEAKTHD  
PLWNAALQVMVEGKMHGFMRMYWAKKILEWTSSPEEALRIAIYLNDRYQLDGSDPNGYVGCWWSICGTHDQG  
WAERAVFGKIRYMNYAGCKRKFDVGAYESRYSSKKLGFPAPAE

>Petromyzon\_mar\_XP\_032805096.1\_cry-1-like

MVLNSIHWFRKGLRLHDNPALREALQGADTVRCVYILDPWFAGASNVGINRWRFLQLQSLLEDLDASLHKLNSRL  
FVIRGQPADVFRLFKAWNISRLTFEYDSEPFGERDAAIKKLASEAGVEVLVRIHTLYNLDRILNELNEGQA  
PLTYKRFQALVSRMEPPERPVGTITSEVMGPCRTPLWEDHDERYGVPSLEELGFDTDGLTTAVWQGGESEALT  
RLDRHLERKAWVANFERPRMNANSLASPTGLSPYLRFGLCLSCRLFHYKLTLEYKKVKNSSPPLSLYGLLW  
REFFYTAATNNPKFDRMEGNPICVQIPWDRNPEALAKWAEGRTPWIDAIMTQLRQEGWIHHLARHAVACFL  
TRGDLWVSWEEMKVFEEELLDADWSVNAGSWMWLSCSSFFQQFFHCYCPVGFGRRTDPNGDYIRRYIPLLR  
FPAKYIYDPWNAPESVQKTARCIIGVDYKPKMANHAEASRLNIERMKQIYQHLSRYRGLCLLASVPSNNGNGM

SGYGQGDGHSRPSSAAGFGTSDGSAGGNGGNDGATCSYQKDQQPCASGSLRQQPREMAAPAGVGSPGALDPLG  
VLKRDRLCRMEPEGEDPPRKKIPKHSSES MAGN

>Phaeodactylum\_tri\_XP\_002178889.1\_cry-dash\_f

MSSSRSKQSFWFLIFVHTVLILTFAAGAATAMRGASVSTVTKATSRASSQVVLHWFHGDRLRLDNPALIHSS  
KTAESCVPVFCFDDSVYGNDNRTPDTRAPHSNDRGQLKCGPRRAQFVLDSVQDLRRSLQSRGSALYVAHGKPA  
QVFQRLVDAWPAVPAADTAAPNGSLLTIVCQREVVREENDAVRAVQSVLRRRFPOAKVQQIWGSTMVELDDLP  
FATDLANMPDTFTFPRNKVEKNCQIGTPLVPVKQLSLPENFSPALKQGLEYLPTLKELGYTDAQIQQVETHDE  
RGVLHFMVAKQPDSHDCLKDYFETRNGMLGPNYSTKFSPLAHGNVSPRYVAAQCRKYEEERVENKSTYWVVF  
ELLWRDFCKFFATKHGDAIFYPYGTTERTDHRHKPWSTFGRNLQAWQEGRTGYPLVDANMRELVATGFMSNRGR  
QNVASFLAINLNHDWRCGGDFEFESHLLDYDVYSNWNWCAAAGMTGGRLNRFNISKQSKDYDQHG DYVRHWLP  
ELAKVPNEFVHEPWKMTSFQQMEYECKLGVDYPNPVPPSRPNPHTDRNNRGRGGHQSKGNRRHGPPDKSRKA  
NASGSNRHQKYEMKSLQPGSFRVKES

>Phaeodactylum\_tri\_XP\_002179379.1\_protein

MSNSDHGGKQRILAPAVQAHSLSRPVAVLFGTHDIRIHDNEALLACHHNHVLVPVFLWQVPVHHWGARGALQV  
VLKEALHQLSLQLSQESINLPLVCGNTADSVSELCKIASEIGASAVYWNREMTPESEMERHRATSLKQLDIA  
AVACQSALLYDVEKLELDEGFHGGHWGTLMPFKRACEKQLGKPDRLPILMKESLACLYSVAPPPQDCKSVPIEE  
LGFETVPPSTKWDEPIRERFPMIHYLAQRRDLHFLIKGLPLYESDRSRADMEYATSQLSVYLIRIGIISPRLY  
WRIEDSSLSPEAKKTFARRLIWRELAYYQLFCFPKMRDRSIRKHYEASEWVTGDEEKGRFNAWKRLTGYPV  
DAGMRELYTTGYLTQSVRMVVASFLVEYLVDWTKGAEFHYTLADADSAINSMWQNAGRSGIDQWNFVLSP  
ENASQDPYGEYTRKWVPELSPLPLQYLQRPWQTFEGDLRMAGIVLGETYPHRIVQDLKGERQKSVEVLAMRR  
RSQEKNDENG YDLIDLPSGIETVVF TKKEYRIDRLGKVLQGPKTATSTVKRRKTKRTTKTDGRRKNNRLPSSL  
A

>Phaeodactylum\_tri\_XP\_002180071.1\_class\_II\_C

MLANRTRVLTSEGTEPKQGQSVVYWMQRDVRSDNWALLWARDLAMQHDVPLHVYALPPPASSDGSNDNRDL  
PPALIQLPMTKRHGAFLLGGLECVYKELKEMKIPLYVCLPDSHEKVGETVCEAILHKKYKAKIVVSDFSPIREY  
RQWMELQAVPILEEAKVPFYQVDAHNIVPVWTATDKRQVGARTLRPRIHKVYNDYLQDYPDLKGNSHSVDQPK  
FDRVEYESFLQMDSESVESVDWAQPGTEAGMKQFEFFSKNGLKIFHEQRNDPVQKHVCSDMSPWINHGHSFQR  
LALNVKALNKHANGAAAFIEEGVIRRELSDNMLYSPNDYDSLETAAGWARESLQLHASDEREFVYSLSELEE  
GRTHDDLWNAAQLOMVRDGMHGFMRMYWAKKILEWSESPVGALRTAQYLNDDKYELDGRDPNGFVGVGWSIMG  
IHDQGWKEREVFGKIRYMNYNGCKRKFVVEEYVAQYKGAAENANA VEETNGSSNKRKSLPSSSNSKQKTARK

>Phaeodactylum\_tri\_XP\_002180095.1\_cry\_photol

MAKSEEKKHDVAIHWFNRGLRFHDNPCLLDACQKSESLPIYVVDPEFPFAQTAGCRAGTIRANFLLESINEV  
DEKLKRMGSQLVVVLGKSHEVLPEIVATTQAKALFYEQEAAPVREQDAETIQAIKNRLKRDGKNYECKFEAY  
ATHTLHPMERYLAQCKDHTAPSTYGSFTKIFNKMSVAKEVNEVKEVPSLPNKS VKLLEKSFAEALRMPTLKDL  
GYAAAADDMKNSGKGGYAFAGGENAAIELLAKNMARSQWVATFEKPKTSPNDATRPSTTALSPYVKHGCISPR  
RFYHELKSVYSKYNSKETS KPPVSLHGLMWRDFNYLVGYSTPNFDK MIDNPIARQIPWDDDPDLLLAWKMSK  
TGYPYIDAIMTQLRETGWIIHLARHSVACFLTRGDLWQSWEDGATVFEEYLLIDADWSINNFWQWLSCTAHFY  
QYFRCYSPIAFGKKTDPNGDYIRKWLPQFKDMPAKYIYEPWEAPIELQKKVGVI VGENYPHPIVIDHKLVS KNN  
MSRMKEAYDAQKNREPMPANESHSSGLNRDTS PKRQRRN

>Phaethon\_lept\_KFQ64035.1

FLLQSLLEDLNSLRKLNLSRLFVVRGQPTDVFPRLFKEWGVTRLTFEYDSEFPFKERDAAIVKLAKAEAGVEVVI  
ENSHTLYDLDRIIEMNGHKPPLTYKRFQAIISRMELPKPKPVSTIIISQQMEMCKVVDIQENHDDVYGVP SLEELG  
FPTDGLAPAVWQGGETEALARLDKHLERKAWVANYERPRMNANSLLASPTGLSPYLRFGCLSCRLFYRRLWEL  
YKKVKRNSTPPLSLYGLLWREFFYTAATNNPKFDRMEGNPICIQIPWDRNPEALAKWAEGKTGF PWIDAIMT  
QLRQEGWIIHLARHAVACFLTRGDLWISWESGVRVFDL LLDADFSVNAGSWMWLSCSAFFQQFFHCYCPVGF  
GRRTDPSGDYVKRYLPKLKGFP SRYIYEPWNAPESVQKAAKCIIGVDY PKPMVNHAETSRLNIERMKQIYQQ  
SRYRGLCLLASVPSCVEDLSGPVTD SASGQGCSTSTAMRLSQADQASPKRKHEGAEEELCAEELYKRAKVTGLP  
APEIPGK

>Phaethon\_lept\_KFQ69809.1

DNWAFLYAQRLALKQELPLHVCFLVPKFLDATIRHYSFMLRGLQEVAKECAELNIPFHLLLG YAKDVLPTFV  
VEHGVGGLVTDFCPLRLPRQWVEDIRERLPADVFPFAQVDAHNIVPCWVTS PKQEYSARTIRGKIHAQLPEFLT  
EFPPVIRHPYPSPCAEPIAWEACYSSQLVDHTVKEVEWATPGTAAGLSVLQSFITERLKSFGAHRNDPNKAA  
LSNLSPWFHFGQVSTQRAILEVQKHRGKYKESVDVFVEEAVVRRELAENFCYNNENYDSVQ GAYDWAQTTLKL  
HAKDKRPFLYELQEQLATTHDPLWNAAQLOMVQEGKMHGFLRMYWAKKILEWTRSP EEALRFAIYLNDRYEL  
DGRDPNGYVGKLQDGGCLWSICGIHDQGWAEARAI FGKIRYMNYAGCKRKF DVGQFERRYAP

>Phaethon\_lept\_KFQ78546.1

WFASENKRFTVISCRFLQLCLELDANLRKLNLSRLFVIRGQPADVFPRLFKEWNI AKLSIEYDSEFPFKERDA  
AIKKLASEAGVEVIVRISHTLYDLDKIIELNGGQPP LTYKRFQTLISRM EPLEMPVETITPEVMEKCTTPVSD  
DHDEKYGVPSLEELGFDTDGLPSAVWPGGETEALTRLERHLERKAWVANFERPRMNANSLLASPTGLSPYLRF  
GCLSCRLFYFKLTDLYKKVKKNSSPPLSLYGLLWREFFYTAATNNPRFDKMEGNPICVQIPWDKNPEALAKW

AEGRTGFPWIDAIMTQLRQEGWIHHLARHAVACFLTRGDLWISWEEGMKVFEELLLDADWSVNAGSWMWLSCS  
SFFQQFFHCYCPVGFGRRTDPNGDYIRRYLPVLRGFPKYIYDPWNAPEVQKAAKCIIGVNYPKPMVNHAEA  
SRLNIERMKQIYQQLSRYRGLGLLATVPSNPNGNGGMLMGYSPGESISGCGSTGGAQLGTGDGHTIIQPCAL  
GDSHTGASGIQQQGYCQASSILHYAHGDNQQSHLLQAGRMALGTGISTGKRPNPEEETQSVGPKVQRQSTN  
>Phaethon\_lept\_\_XP\_010281210.1  
MQHSSIHWFRKGLRLHDNPALLAAATNCRR LHPPFILHPSSNRAGINAQRFLLDALRDLDGSLQEMGSRLFVA  
QGCPEEVFPHLFHAWGTTRLTFEVDTEPSACRRDHGVEVIREVSHTLYDTERVLALNDGKAPLTYKRLQSLLA  
LLGPPEKPAPALTQEHLQGCCLTPCQASHDGDYRVPTLEELGQDPAKVGPHLYPGGETAALARLDLTMERTAWV  
CNFKKPETEPTSLSPSTTVLSPYLKFGCLSVRTFWWRLDEIYQGREHSQPPVSLHGQLLWREFFYTAGASIPN  
FDRMAGNPVCLQVEWDDNPQHLHAWREGRTGYPFIDAIMTQLRTEGWIHHLARHAVACFLTRGDLWVSWEEGL  
KVFEELLLDADWSLNTGNWLWLSGSAFFHRYFHVYSPITFGKKTQDGAYIRKYLPIKDFPTKYIYEPWKAP  
QAVQERAGCLVGTHYPQPIVEHGVASKRNLGRMKAAARAQKDTKREPPAGPSTVKSQRKKPKIEQH  
>Phaethon\_lept\_\_XP\_010288559.1  
MPHRTIHLFRKGLRLHDNP TLLAALESSEVVYPVYILDRKFMTSVMHIGALRWHFLLQALEDLQKNLCQLGSC  
LLVIQGEYESVLRDHARKWNITQITLDAEMEPFYKEMEANIRCLGEALGFKVLSLVGHSLYDTRRILDNLNGGT  
PPLTYKRFLHILSLLDPEMPVRNLTAEDFQRCSPDPGLAECYRVPLAVDLKIPLESLSPPWRGGETEGLQRL  
EQHLTDQGWVASFTKPRITIPNSLLPSTTGLSPYFSMGCLSVRTFFYRLSNIYAQAKYHSLPPVSLQGQLLWRE  
FFYTVASATPNFTKMAGNPICLQISWYEDAERLHKWKTAQTGFPWIDAIMTQLRQEGWIHHLARHAVACFLTR  
GDLWISWEEGMKVFEELLLDADYSINAGNWMWLASAFFHQYTRIFCPVLFGKRTDPEGQYIRKYLPIKKNFP  
SKYIYEPWRASEEEQKQAGCIIIGQDYPFPMVNHKEASDHNQLMKQVREEQYKTAQLTRGWELACARWRNAYP  
KAVRLYF  
>Phaethon\_lept\_\_XP\_010293381.1  
MSGAARTAICLLRCDLRAHDNQVLHWAQSNADFVIPLYCFDPRHYLGTHCFGFPKTGPHRLRFLLESVKDLRE  
TLQKKGSTLVVRKGKPEDVVC DLITQLGSVSAVAFHEEATQEELDVEKGLCQVCSQHGVKIQTFWASTLYHRD  
DLPFRPIARLPDVYTHFRKVVSEAKVRPTLHMADQLKPLAPGVEEGCILT MEDLGQKDPVTDPRTAFCPSGG  
ETQALMRLQYYFWDTNLVASYKETRNLVGM DYSTKFAPWLALGCISPRYIYEQIQKYEKERTANQSTYVWL  
ELLWRDYFRFVALKYGKRIFSLKGLQSKEVPWKDLQLFDCWKDGKTGVFPVDANMRELAATGFMSNRGRQNV  
ASFLTKDLGLDWRMGAWEFYEYLLVDYDICSNYGNWLYSAGIGNDPRDNRKFNMIKQGLDYDGN GDYVRLWVPE  
LQGIKGPDIHTPWALNSAALSQAGVTLGETYPHPVVTAP EWSRHINQRPPGRSPHPRGRGPAHTLMQHKDRG  
IDFYFSRKKDV  
>Phalacrocorax\_carb\_\_KFW93274.1  
RFLQSLLEDLDNSLRKLN SRLFVVRGQPTDVFPRLFKEWGVTRLTFEYDSEFPFGKERDAAI IKLAKEAGVDV  
IENSHTLYDLDRIIELNGHKPPLTYKRFQAIISRMELPKKPVSTVMSQQMETCRVDIQENHDDVYGVPSLEEL  
GFPTDGLVPAVWQGGETEALARLDKHLERKAWVANYERPRMNANSL LASPTGLSPYLRFGLCLSCRLFYRLWE  
LYKKVKRNSTPPPSLYGQLLWREFFYTAATNNPKFDRMEGNPICIQIPWDRNPEALAKWAEKGTGFPWIDAIM  
TQLRQEGWIHHLARHAVACFLTRGDLWISWESGVRV FDELLDADFSVNAGSWMWLSCSAFFQQFFHCYCPVG  
FGRRTDPNGDYIRRYLPVLRGFPKYIYDPWNAPEVQKAAKCIIGVDY PKPMVNHAE TSRLNIERMKQIYQQL  
LSRYRGLCLLASVPSCVEDLSSPVTD SASGQGCSTSTAIRLSQADQASPKRKHEGAEELCTEELYKRAKV TCL  
PAPEIPGKS  
>Phalacrocorax\_carb\_\_XP\_009499104.1  
FLLQCLEDLDANLRKLN SRLFVIRGQPADVFPRLFKEWNI AKLSIEYDSEFPFGKERDAAIKKLASEAGVEVIV  
RISHTLYDLDKIIELDGGQPPLTYKRFQTLISRM EPLEMPVETITPEVMEKCTTFVSDDHDEKYGVPSLEELG  
FDTDGLPSAVWPGGETEALTRLERHLERKAWVANFERPRMNANSL LASPTGLSPYLRFGLCLSCRLFYFKLTDL  
YKKVKKNSSPPLSLYGQLLWREFFYTAATNNPRFDKMEGNPICVQIPWDKNPEALAKWAEGR TGFPWIDAIMT  
QLRQEGWIHHLARHAVACFLTRGDLWISWEEGMKVFEELLLDADWSVNAGSWMWLSCSSFFQQFFHCYCPVGF  
GRRTDPNGDYIRRYLPVLRGFPKYIYDPWNAPEVQKAAKCIIGVNYPKPMVNHAEASRLNIERMKQIYQQL  
SRYRGLGLLATVPSNPNGNGGMLMGYSPGESISGCGSTGGAQLGTGDGHTVVQPCALGDSHTGASGIQQQGY  
CQASSILHYAHGDNQQPQLLQSGRTALDTGISAGKRPNPEEETQSVGPKVQRQSTN  
>Phalacrocorax\_carb\_\_XP\_009509490.1  
MSGAARTICLLRCDLRAHDNQVLHWAQSNADFVIPLYCFDPRHYLGTHCYSFPKTGPHRLRFLLESVKDLRE  
TLKKKGSTLVVRKGKPEDVVC DLITQLGSVSAVAFHEEATQEELDVEKGLCQVCCQHGVKVQTFWASTLYHRD  
DLPFRPIARLPDVYTHFRKAVESEVKVRPTLRMADQLKPLAPGVEEGCIPTMEELGQKDPVTDPRTAFCPSGG  
ETQALMRLQYYFWDTNLVASYKETRNLGLGMDYSTKFAPWLALGCISPRYIYEQIQKYEKERTANQSTYWL  
ELLWRDYFRFVALKYGKRIFSLRGLQSKEVPWKDLQLFDCWKEGKTGVFPVDANMRELAATGFMSNRGRQNV  
ASFLTKDLGLDWRMGAWEFYEYLLVDYDVCSNYGNWLYSAGIGNDPRDSRKFNMIKQGLDYDGN GDYVGLWVPE  
LQGIKGADIHTPWALSSAALSQAGVTLGETYPQPVVTAP EWSRHITQRP  
>Phalacrocorax\_carb\_\_XP\_009513296.1  
LYWMSRDQRVQDNWAFLYAQRLALKQELPLHVCFLVPKYLDATIRHYGFMLRGLQEVAEECAELNVPFHLL  
GYAKDVLPTFVVEHGVGGLVTD FCPRLRRQWVEDV SERLPEDVPFAQVDAHNIVPCWVASPKQEYSARTIRG  
KIHTQLPEFLTEFPVVRHPYPPSCSVEPIAWEACYSSLQVDR TVKEVEWATPGTAAGLAVLQSFITERLKSF

GSLRNDPNKAALSNLSPWFHFGQVSTQRAILEVQKHRGKYKESVDAFVEEAVVRRELAENFCYYNENYDSIQG  
AYDWAQTTLKLHAKDKRPFLYKLQELEGQTTHDPLWNAAQLQMVREGKMHGFLRMYWAKKILEWTRTPEEALQ  
FAIYLNDRYELDGMDPNGYVGCWSICGIHDQGWAERAI FGKIRYMNYAGCKRKFDVQGQFERRYTPHTLSQ  
>Phalacrocorax\_carb\_XP\_009513466.1  
MPHRTIHLFRKGLRLHDNP TLAALESSEVVYPVYILDRKFMTSAMQIGALRWHFLLQSLDDLQKNLCQLGSC  
LLVIQGEYESVLRDHIQKWNITQVTLDAEMEPFYKEMEANIRHLGEELGFEVLSLLGHSLYDTRKILDLNSGT  
PPLTYKRFLHILSLLDPEVPVRNL SAEDFQRCRPRDPGLAECYRVPLPVDLKI PPESPSPWRGGETEGLQRL  
EQHLTDQGWASFTKPRTIPNSLLPSTTGLSPYFSMGCLSVRTFFYRLSNIYAQAKHSLPPVSLQGQLLWRE  
FFYTVASATPNFTKMAGNPICLQISWYEDAERLHKWKT AQTGFPWIDAIMTQLRQEGWIHHLARHAVACFLTR  
GDLWISWEEGMKVFEELLLDADYSINAGNWMWLSASAFFHQYTRIFCPVRFGKRTDPEGQYIRKYLPI LKNFP  
SKYIYEPWTASEEEQKQAGCII  
>Phascolarctos\_cinereus\_XP\_020865444.1\_cryptochro  
MAATTVVKVPAAAAAPAPAPAPAPAPAPALPTPTQTQTQTTPAPAPEEGASSVHWFRKGLRLHDNPALQAA  
LRGARCVRVCYIILDPWFAASSSVGINRWRFL LQSLLEDLDISLRKLN SRLFVVRGQPTDVFPRLFKEWGVTRLT  
FEYDSEPF GKERDAAIVKMAKEAGVEVVTENSHTLYDLDR IELNGQKPPLTYKR FQAIISRMELPRKPVSCV  
TSQQMERCQAEIQENHDDTYGVPSLEELGFPTDGLGPAVWQGGEMEALARLDKHLERKAWVANYERPRMNATS  
LLASPTGLSPYLRFGCLSCRLFYRLWELYKKVKRNNTPPLSLYGQLLWREFFYTAATNNPKFDRMEGNPICI  
QIPWDRNPEALAKWAEGKTGFPWIDAIMTQLRQEGWIHHLARHAVACFLTRGDLWVSWESGVRVFEDELLLDAD  
FSVNAGSWMWLSCSAFFQQFFHCYCPVGFGRRTPDPSGDYVRRYLPQLKGFP SRYIYEPWNAPE SVQKAAKCI I  
GVDYPKPIVNHAETSRLNIERMKQIYQQLSRYRGLCLLASVPSCMEDLSNPMAETSMGQGS GSVSGTGPKPLPC  
SPASPKRKLEAVEETS GEEH SKRARVMAALPVPDLAGKV  
>Phascolarctos\_cin\_XP\_020838097.1\_cry-1\_X1  
MGVNAVHWFRKGLRLHDNPALKECIEGADTVRCVYIILDPWFAGSSNVGINRWRFL LQCLEDLDANLRKLN SRL  
FVIRGQPADVFPRLFKEWNI AKLSIEYDSEPF GKERDAAIKKLASEAGVEVIVRISHTLYDLDKI IELNGGQP  
PLTYKR FQTLISKMEPLATPVETITPEAMHKCVTPLSEEHDEKYGVPSLEELGFDTDGLPSAVWPGGETEALT  
RLERHLERKAWVANFERPRMNANSL LASPTGLSPYLRFGCLSCRLFYFKLTDLYKKVKKNSSPPLSLYGQLLW  
REFFYTAATNNPRFDKMEGNPICVQIPWDRNPEALAKWAEGRTGFPWIDAIMTQLRQEGWIHHLARHAVACFL  
TRGDLWISWEEGMKVFEELLLDADWSINAGSWMWLSCSSFFQQFFHCYCPVGFGRRTPDNGDYIRRYLPVLRG  
FPAKYIYDPWNAPEGVQKVAKCLIGVNYPKPMVNHA EASRLNIERMKQIYQQLSRYRGLGLLASVPSPNPNNG  
GLLGYPGESIPACSSSGGAPAGASDGQILQACALPEPPTGASGSQQAGYSQSGSISHYSREDSQQAYMLKP  
GRSSLGGGKRHRPEEETQGVGPKMQRQSVN  
>Phascolarctos\_cin\_XP\_020841690.1\_photolyase  
MAPKKRSHSTSSEPEKTESQESKAKRKPLQKHQFSKSNMVQKEEEDKREGDKRGGTEGLQEVVRQSRLRTAPS  
VLEFRFNKQVRVRLISQDCHLQDRSQAFVYWMSRDQRVQDNWAFLYAQRLALKQKLPLHVCFLAPCFLGATIR  
HYDFMLRGLLEEVAEECEKLCIPFHLLGLPKDVLPAFVQTHGIGGIVTDFSPLLHHTQWVKDVQDALPRQVPF  
VQVDAHNI VPCWVASDKQEYGARTIRHKIHDRLP HFLTEFPFVICH PYLSNIQAE PVDWNGCRAGLQVDRSVK  
EVSWAKPGTASGLTMLQS FIAERLPYFGSDRNNPNKDALS NLSPWFHFGQVSVQRAILEVQKHSRYPDSVTN  
FVEEAVVRRELADNFCFYKNKYDKLEGAYDWAQTTLRLHAKDKRPHLYSLEQLESKTHDPLWNAAQMOMVKE  
GKMHGFLRMYWAKKILEWTHSPEEALEFAIYLNDRFQLDGRDPNGYVGC MWSICGIHDQGWAEREIFGKIRYM  
NYAGCKRKFNVAEFERKYSSAD  
>Phoenicopterus\_rube\_ruber\_KFQ77349.1  
IGALRWHFLLQSLLEDLQKNLCQLGSFLLVLQGEYESVLRDHIQKWNITQVTLDAEIEPFYKEMEANIRRLGDE  
LGFEVLSLVGHSLYDTRKILDLNGGTPPLTYKRFLHILSLLDPEVPVRSLTAEDFQRCRPPPEPRLAERYGVP  
LPEDLKI PLESLS PWRGGETAGLQRL EQHLTDQGWASFTKPRTIPNSLLPSTTGLSPYFSLGCLSVRAFFYR  
LSNIYAQAKNHSLPPVSLQGQLLWREFFYTVASATPNFTKMAGNPICLQIGWYEDAERLHKWKT AQTGFPWID  
AIMTQLRQEGWIHHLARHAVACFLTRGDLWISWEEGMKVFEELLLDADYSINAGNWMWLSASAFFHQYTRIFC  
PVRFGKRTDPEGQYIRKYL PVLKNFPSKYIYEPWTASEEEQKQAGCII GQDYPPFMVNHKEASDHN LQLMKQV  
REEQHR  
>Phoenicopterus\_rube\_ruber\_KFQ82110.1  
RFL LQSLLEDLDNSLRKLN SRLFVVRGQPTDVFPRLFKEWGVTRLTTFEYDSEPF GKERDAAIVKLAK EAGVEV  
IENSHTLYDLDR IELNGHKPPLTYKR FQAIIVSRMELPKKPVSTVTSQQMEMCKVDIQENHDDVYGVPSLEEL  
GFPTDGLAPAVWQGGETEALARLDKHLERKAWVANYERPRMNANSL LASPTGLSPYLRFGCLSCRLFYRLWE  
LYKKVKRNS TPPLSLYGQLLWREFFYTAATNNPKFDRMEGNPICIQIPWDRNPEALAKWAEGKTGFPWIDAIM  
TQLRQEGWIHHLARHAVACFLTRGDLWISWESGVRVFEDELLLDADFSVNAGSWMWLSCSAFFQQFFHCYCPVG  
FGRRTDPSGDYVKRYLPKLKGFP SRYIYEPWNAPE SVQKAAKCI IGVDYPKPMVNHAETSRLNIERMKQIYQQ  
LSRYRGLCLLASVPSCVEDLSGPVTD SASGQGCSTSTAMRLSQADQASPKRKHEGAEE LCPEELYKRAKVTGL  
PAPEIPGKS  
>Phoenicopterus\_rube\_ruber\_KFQ82669.1  
RFL LQCLELDANLRKLN SRLFVIRGQPADVFPRLFKEWNI AKLSIEYDSEPF GKERDAAIKKLASEAGVEVI  
VRISHTLYDLDKI IELNGGQPPLTYKR FQTLISRMEPLEMPVETITPEVMEKCTTPVSDDHDEKYGVPSLEEL

GFDTDGLPSAVWPGGETEALTRLERHLERKAWVANFERPRMNANSLASPTGLSPYLRFGCLSCRLFYFKLTD  
LYKKVKKNSSPPLSLYGQLLWREFFYTAATNNPRFDKMEGNPICVQIPWDKNPEALAKWAEGRGTGFPWIDAIM  
TQLRQEGWIHHLARHAVACFLTRGDLWISWEEGMKVFEELLLDADWSVNAGSWMWLSCSSFFQQFFHCYCPVG  
FGRRTDPNGDYIRRYLPVLRGFPKYYIDPWNAPESVQKAAKCIIGVNYPKPMVNHAEASRLNIERMKQIYQQ  
LSRYRGLGLLATVPSNPNGNGGGLMGYSPEGESISGCGSTGGAQLGTGDGHTVVQPGALGDSHTGASGIQQQG  
YCQASSILHYAHGDNQQSHLLQAGRTALGTGISAGKRPNPEEETQSVGPKVQRQSTN  
>Photinus\_pyr\_XP\_031344947.1\_cry-1-like  
MSAISGCMGPALSKGPEVHTVHWFRKGLRFHDNPALRESLKGAKTFRCVFVLDPWPFAGSSNVGINKWRFL LTC  
LEDLDRSLQKMNSRLFVVRGQPADVL PKLFKEWGTTLLTFEEDPEPFGRVRDQNIITICKEMGIAVSCKVSHT  
LYHLEDIIDRNGGRAPLTYHQFQTIIASMDPPSFAEPPVSAKDVANIATPIEDDHVEKYGVPSLEELGFDTEG  
LLPPVWLGGESEALARLERHLERKAWVASFGRPKMTPQSLLPSQTGLSPYLRFGCLSTRLFYYQLTDLYKKIK  
KTVPPLSLHGQLLWREFFYCAATRNTNFDKMLGNPICVQIPWDKNAEALAKWANGQTGFPWIDAIMTQLREEG  
WIHHLARHAVACFLTRGDLWLSWEEGMRVFEELLLDADWSVNAGMWMWLSCSSFFQQFFHYCPVKFGRKADP  
NGDYIKKYLPLVKNIPTQYIHEPWPAPDVIQRTSKCIIGKDYPLPIVNHASASRINIQRMKQVYQKLANYRNI  
DTWNV PQKQNYIRFENNAVNGNVI  
>Physcomitrium\_pat\_XP\_024358644.1\_cry\_DASH,  
MLSTSVLPGNRHLRSSFLPAVFEEFAASQNLRRAGAWRVQKFAVTLTVSASGEKSKMTSRKGTGIAIVWFRND  
LRISDNEALLKAWQSSQAVVPLYVVDPRLYGQTYHFGFPKTGELRAQFIMESVANLRDNLQRGLDLIVRQ GK  
PEDVVPSIAKSIGAHTVYAHKETCSEETT VETGVKRG LANLEGPKMQIRLDFVWGGLYHLDDLFPSPSELP  
DVYTQFRKGVEYNCKVRPALKMPTQMGPLPESLSEKIGELGDIPTMAELGLKYREQSPLGVMHFEGGETAALA  
RLQDYFWNKDQLKIYKETRNGMLGANYSTKFSPLAHGCLSPRTIHDEVKRYETERVANDSTYVWLFELIWRD  
YFRFVSIKYGNAIFHLGGPRKVVGKRWSONRELFEAWREGRTGYPLIDANMKELAA TGFM SNRGRQIVCSFLV  
RDLGLDWRMGGEWFETCLLDYDPCSNYGNWTYGAGVGNDPREDRYFSIPKQSATYDPEGEYVAHWLPSLKQSP  
PKQRNFPGDAYLRPIVPLKFGMGSGGKPNYSRAGYKGNVGVKGR  
>Physcomitrium\_pat\_XP\_024361046.1\_(6-4)DNA\_p  
MVAESFRCVGHSFFVKSLPSAALRTANCGRRRSFSVSCSNEKGNMNGKRSMLMFRKGLRLHDNPALLRSCEG  
ASHVYPVFVLDPWFLAPDPTAPSPGSKLVGNRIRFLLQSLLEDLDENLRKHGSRLVLVHGNPTTVIPELLMKW  
QINELCFEFDTEPYAQDRDADIKKLATKYGVEVFSVSHTLFNPIDTIRKNGGQTPLTYQAFKLTKGPPLPV  
TAPLQIPSPPEDLNDVHVVPVKLEDLGYVNLDEEFSHPGGETEALRRLDKSLVNQKWVCDFEKPKGNPTAF  
IEPATTVLSPYLKFGCLSCRLFHQRL LAVYSQNKKHSSPPVSLEGQLLWREFFYTAGYGT PNFDRMLGNPICK  
QIPWKDDRLLAARDGQTGYPWIDAAMVQLRKWGMHHLARHAVACFLTRGDMFVYWEKGRDVFDRLLIDSD  
WAINNGNWLWLSASAFFHQYHRIYSPVTFGKKYDPDGLYVKHFLPVLKDMPKYYIYEPWTAPLAVQKKANCI  
GVDYPRPMAVLNSCRPLHCQQGMPREDGHCLFTEPFASSTVRKQYDAQEKAWC  
>Physcomitrium\_pat\_XP\_024374871.1\_photolyase  
MPPKKKLKALSVVKEEVHSEPKGRSLKPPKVEEEGEVSELSRKRPKPSSTVTEEDKVTESRVEKLGKDAAAAA  
SSNSERRPPLSLGVHPGRIQNLKLGENEHGPVVYWM SRDHRSDN WALLHAVHQAREKGPVAVAFNLVESFL  
EARARHFGFMLRGLRVVEQNLKAVNIPFFLFRGNPVETIPEFLKKCNASLLVMDYSSLRIGRQWRNGVCENVA  
SSVAVAEVDAHNVPVWRASDKLEYGARTIRNKINNQLAEFLNEYPVLENPGKPWEAGAPDTIDWDALIAEVS  
RFGSEVPEVTWCEAGEDAALEALAGKSKGFVNIRIRNYVNRNDPSKPTGLSGLSPYLHYGHISAQRCALEARK  
VRKVHTKSVD AFLEELIVRGGLAENFCHYQPNYDNLKGAWGWAQESLRIHAKDKREV VYTESELEAGKTHDKL  
WNAAQLEMVYYGKMHGFM RMYWAKKILEWTESPEEALRIAIYLN DKYELDGRDPNGYVGC MWSICGIHDQGWK  
ERPVGKIRYMNFNCGKCRKFNV DGYIMNVNQMVAKTKQLKEGSTTAAPSKPVAGKSDKL  
>Physcomitrium\_pat\_XP\_024380321.1\_cry-1-like  
MAACTIVWFRDLRLLEDNPALIAAARAGTVVPVFVWSPAEDGQFHPGRVSRWWLKQSLTHLELSLKKLGSPLI  
LRKSPDTLSVLEIAEATGATQVFYNHLYDPVSLVRDHRVKQGLSQRGIVVHTFNGDLLYEPWEVYDEEGQAF  
TVYEAFWKKCMSMPFEPEAPLLPPRRLTGPIGKIVGCNAEELGLEDEFKSSNALLARAWCPGWGFANKSLDS  
FLRSPLIDYARDRQKADGASGTP TSLSPHLHFGELSVRKIFHEVRKRQITWAREGNAGGEASVMFLRALGF  
REYSRYLSFHFPFTHERSLLANLKSFPWRADEGYFKAWRQGR TGYP LVDAGMRELWATGWAHNRIRVVVASFS  
VKFLQLPWRWGMKYFWDVLLDADLECDVLGWQYISGSLPDGHELDRIENPEVEGYRFPDGDYVRRWIPELAR  
LPNEWVHHPPWDAPPSALRAAGVELGTNYPRIIVEIGAARERLQASLAEMWERDAAMKAALANGLEGLGETVE  
VAGTGGPEHERMDVPRVMVHMQRDADMSCASRRDQLVPEIVPNQFHIRAHESIMNRSAMVEDGEEAGRAAV  
PMVFASVRRGMVYGGHHVEGNGGEVAQNASQRIQWPTVTAVDYELDSTAESASVTGRGGSEGGTVPVVWSQSV  
SARTPIQVREGLVPEVRRGPGLSRRQLQASVQRVNLEGMTSNKQAEEDFYVPKLVKWTQPRKRRVKQDG  
>Physcomitrium\_pat\_XP\_024385617.1\_blue-light  
MEARGADSLWGVGIRRELFRASIEGHHCPRCSSVRVLSGSPPAFPHTPPPLPVFVLSISFLSAMAGYGGLD  
DLELILDRNLHRLAASRTNAPAPPWTNSGAAATGAEEVDDEEEAVASKEEVADAASF GNPLPSAASLSLALN  
SVLTSSLILSKNNVVPQASQRGVGP AISGAVPSQKKSHSPVPVMAS SKVQVALDIPVATPITVSKKSANYVS  
AFPEYEKL RGPDFKDPANGCGLRRASIVWFRNDLRVHDNEALVSANRDSL SILPVYCFDPKDYGKSSSGFDKT  
GPYRANFLLCEVANLRSSLRERGS DLIVRVGSPEAVLVDLAKSVGA EALYVHQEVTYEELQAE EKVAALQEK  
GIETKYFWGSTLFHLEDLPFKLQDMPSNYGGFREKVQNVAIRDTIEAPQQLKGLPACGNVKPGSIP SIEVLGL

NPATNLRKQGSVTVGGDGLLGEEEEALQRLQKFALEARSQTSNLKASKSQSESSGDSLYGANFSCKISPWLTM  
GCLSPRRMFEDLKKSASSASAGAMSALAVKASGAGSDDNGLNWLVFELLWRDFFRFITKKYGTGKRLSEATPA  
TASTASLVAA

>Physeter\_catodon\_XP\_007125038.1\_cryptochro

MAAAVATAALAAPAPAARAEAGASSVHWFRKGLRLHDNPALQAAVRGACHMRCVYILDPWFAASSSVGINRWRF  
LLQSLLEDLDTSLRKLNSRLFVVRGQPADVFPRLFKEWGVTRLTFEYDSEFPFGKERDAAIMKMAKEAGVEVVTE  
NSHTLYDLDKIIELNGQKPPLTYKRFQAIISRMELPKKPVGSVTSQQMEGCRAEIQENHDETYGVPSLEELGF  
PTEGLGPAVWQGGETEALARLDKHLERKAWVANYERPRMNANSLASPTGLSPYLRFGCLSCRLFYRRLWDLY  
KKVKRSSTPPLSLFGQLLWREFFYTAATNNPRFDRMEGNPICIQIPWDRNPEALAKWAEGKTGFPPWIDAIMTQ  
LRQEGWIIHHLARHAVACFLTRGDLWVSWESGVRVFDELLLDADFSVNAGSWMWLSCSAFFQQFFHCYCPVGFG  
RRTDPGSDYIRRYLPKLKGFPSRYIYEPWNAPEISIQKAAKCIIGVDYPRPLVNHAETSRLNIERMKQIYQQLS  
RYRGLCLLASVPSCMEDLSNPVAEPSSSQVGSMSNAGPRPLPSGPASPKRKLGAEEPPGEELSKRARVAGLP  
PSELPSKDV

>Physeter\_cat\_XP\_023973802.2\_photolyase

ELLHAKGPAPVEKWTPGTQAGLQQLRAFCCPQQLVNYEKTRNDPLAGAQSNLSPYLHFGQLSQQRCLLEALLV  
KRGTTGGLESNRSSSSSGDASCRSRTSSHNGSSSGVDTGGSNRHPNASTRDDSRIKVEDRRSSSSASSKPARPNI  
SLGSRSRSGGSRNSTSSAPSGGFNRVNITGVDAFVEELVVRCALENFVITYCGDKYDKIEGAPRWAQESLRQ  
HEKDPRPVPLYDLRVLEAAETYDALWNASQQQVMKEGKMHGYLRMYWAKKILEWMKSPADALAGAILLNDKYSL  
DGTDPNGYVGCWMSIAALHDQPFKERPIYGKVRMYNAGCQRKFVNNAFIQLYTTSSNNSRTSTSAGITTKRR  
QGSSSSKEESKSIRRDGRTSSSTREAEAPKYGAKRTAEKGAERLGKALLTSTPKELRQQY

>Physeter\_cat\_XP\_023983171.1\_cry-1\_X1

MGVNAVHWFRLKGLRLHDNPALKECIQGADTIRCVYILDPWFAGSSNVGINRWRFLLQCLEDLDANLRKLNSRL  
FVIRGQPADVFPRLFKEWNI TKLSIEYDSEFPFGKERDAAIKKLATEAGVEVIVRISHTLYDLDKIIELNGGQP  
PLTYKRFQTLISKMEPLEIPVETITSEVIEKCTTPLSDDHDEKYGVPSLEELGFDTDGLSSAVWPGGETEALT  
RLERHLERKAWVANFERPRMNANSLASPTGLSPYLRFGCLSCRLFYFKLTDLYKKVKKNSSPPLSLYGQLLW  
REFFYTAATNNPRFDKMEGNPICVQIPWDKNPEALAKWAEGRTGFPPWIDAIMTQLRQEGWIIHHLARHAVACFL  
TRGDLWISWEEGMKVFEELLLDADWSINAGSWMWLSCSSFFQQFFHCYCPVGFGRRTPNGDYIRRYLPVLRG  
FPAKYIYDPWNAPEGIQKVAKCLIGVNYPKPMVNHAEEASRLNIERMKQIYQQLSRYRGLGLLASVPSNPNGNG  
GLMGYSPGENIPGCSSSGCTPGSGILHYAHGDSQQTHLLKQGRSSTCTGLSSGKRPSQEEDTQSIGPKVQRQ  
STN

>Piaya\_caya\_NWH71253.1

MMHRTIHLFRKGLRLHDNPNTLLAALESSEVVYPVYILDRTFLT SAMHIGNLRWHFLLQTLEDLQKNLCQLGSY  
LLVIQGEYESVLRDHVQQWNITQVTLDAEMEPFYKEME VNIRRLGEELGFVLSRMGHSLYDTKRILDLNGGM  
PPLTYKRFHLHLSLLGDPEVPVQTLTAEDFQRC HPPAPGLAEHYRVPLPVDLKIPSESLSPWRGGETEGLRRL  
EQHLTDQGWVASFTKPR TIPNSLLPSTTGLSPYFSMGCLSVRTFFYRLSNIYAQAKHHS LPPVSLQGQLLWRE  
FFYTVASATPNFTKMAGNPICLQINWNENAEKLHKWKMAQTGFPPWIDAIMTQLRQEGWIIHHLARHAVACFLTR  
GDLWISWEEGMKVFEELLLDADYSINAGNWMWLSASAFFHQYTRIFCPVRFGKRTDPEGQYIRKYL PVLKNFP  
SKYIYEPWTASEEEQKQAGCIIGEDYPFPMVNHKEASDHN LQLMRQVREEQORTAQLTRDDTDDPMEVKVKRE  
HSEHTLKGKVAKMTE

>Piaya\_caya\_NWH72433.1

RFLQCLEDLDANLRKLNSRLFVIRGQPADVFPRLFKEWNI AKLSIEYDSEFPFGKERDAAIKKLASEAGVEVI  
VRISHTLYDLDKIIELNGGQPPLTYKRFQTLISRMEPLEMPVETITPEVMEKCATPVSDDHDEKYGVPSLEEL  
GFDTDGLPSAVWPGGETEALTRLERHLERKAWVANFERPRMNANSLASPTGLSPYLRFGCLSCRLFYFKLTD  
LYKKVKKNSSPPLSLYGQLLWREFFYTAATNNPRFDKMEGNPICVQIPWDKNPEALAKWAEGRTGFPPWIDAIM  
TQLRQEGWIIHHLARHAVACFLTRGDLWISWEEGMKVFEELLLDADWSVNAGSWMWLSCSSFFQQFFHCYCPVG  
FGRRTDPNGDYIRRYLPVLRGFP AKYIYDPWNAPE SVQKAAKCIIGVNYPKPMVNHAEEASRLNIERMKQIYQQ  
LSRYRGLGLLATVP SNPNNGNGGLMGYSPGESISGCGSTGGHLFPASLGAQLGTGDGHTVVQP CALGDSHTG  
SGSIQQGYCQASSILHYAHGDNQQSHVLQAGRTALGTGISAGKRPNPEETQSVGPKVQRQSTN

>Piaya\_caya\_NWH73114.1

PKASPRFTGPAQLFLLFSSSVLKVDYDVC SNYGNWLYSAGIGNDPREN RKFNMIKQGLDYDSNGDYVQLWVPE  
LQSIKGADIHTPWALSSAALAQAGVT LGETYPQPIVIAPEWSRHVNQSLQGRSTHPRGRRAPAHTPVPHNRG  
IDFYFSHKKDV

>Piaya\_caya\_NWH74562.1

DNWAFLYAQRLALKQELPLHVCFLVPKFLDATIRHYGFMLKGLQEVAKECAELNIPFHLLLGyakdVLPafV  
VEHVGGLVTDfCPLRLPRQWVEDVKERLPEDVPFAQVDAHNIVPCWVASPKQEYSARTIRSKIHTQLPEFLT  
EFFSVIRHPHPSPCAEPIAWEACYSSLQVDRTVEEVKWATPGTAAGLAVLQSFITERLKFFGSHRNDPNKAV  
LSNLSPWFHFQGVSTQRAILEVQKHSKYKESVDAFVEEAVVRRELAENFCYNNENYDSMQGSAYDWAQTTLK  
LHAKDKRPFLYELQELEQGTTHDPLWNAAQLQMVREGKMHGFLRMYWAKKILEWTHSPEEALRFaiYlNDryE  
LDGRDPNGYVANTSSLCLAGCLWSIGGIHDQGWAERAVFGKIRYMN YAGCKRKFDVGEFERRYAPCT

>Piaya\_caya\_NWH75916.1

HLTYFASRIIELNGHKPPLTYKRFQAIISRMELPKKPVSTVMSQQMETCKVDIQENHDDVYGVPSLEELGFPT  
DGLAPAVWQGGETEALSRLDKHLERKAWVANYERPRMNANSLASPTGLSPYLRFGCLSCRLFYYRLWELYKK  
VKRNSTPPLSLYGQLLWREFFYTAATNNPKFDRMEGNPICIQIPWDRNPEALAKWAEKGTGFPWIDAIMTQLR  
QEGWIHHLARHAVACFLTRGDLWISWESGVRVFDELLLDADFVSNAGSMMWLSCSAFFQQFFHCYCPVGFGRR  
TDPGSDYVKRYLPKLKGFPSRYIYEPWNAPESVQKAACIIGVDYPKPMVNHAETSRLNIERMKQIYQQLSRY  
RGLCLLASVPSCVEDLSGPVTDASAGQGCSTSTAMRLSQTDQASPKRKHEGTEELCTEELFKRAKVTGLHTPE  
IPGKSL

>Picea\_sit\_ABK24574.1\_unknown

MAPAYTSQNFRDLEMIMDNNIQRVISPFSSSHRHQHQQRLHRPTPPPEPEQQQQEVIVSECCAVEAQKPNPIA  
PPNLLASSASISLALGSILSSNLLPSRTGLLPTTPKLTARLGSARVPVRPSSLPAPKKRTSPLPVQASTALQV  
PAPPPATSHTKATGVSAFFPDYHRLRQSGRDAGDPSNAAALRKAIVWFRNDLRVHDNEALSSANKEALSVLV  
YCFDPRDYGKSSSGFDKTGPFRAFLLFECVANLRANLRERGS DLVVRIGRPPEEVLVELAKSIGADALYAHQEV  
SHEEIIATEEKIKSSLEEEGVETKFFWGSTLYHPEDLPFKLQDMPSNYGGFRERVQRLSVRQIIKDPEQLKGLP  
TRGDVEPGKVPSLLDLGLNPNFGQDGKTAVNASLTGGESEALQRLKRFAVECREQPKNLKGKDGSGESLYGANF  
SCKISPWLAMGCLSPRYMFEELKKSEKISISSSLGKSSGADSGQGGLNWLKFELLWRDFFRFITKKYGSACKQ  
QDASPVTACTGALAV

>Picea\_sit\_ABR16130.1\_unknown

MNLIQSHAQKRDGFVKEFALKLGVDVFTPISTHIFSPREEIIKKNGGKPPLTYQSFIKLI GLPPLPLGNGSPSI  
PPVGIDNSNDLPIPTLTDLGFGDVSQEECNPFIGGETEALKRMDASIQDQKWVAAFEKPKGDPTAFLKPATTV  
LSPYLKFGCLSSRLFYQRLQEVYRKVKKHTEPPVSLEGQLLWREFFYTVAYGTPKFDQMEGNPICKQIPWNDD  
DSLLSAWRDGTGYPWIDAVMVQLRKWGMHHLARHAVACFLTRGDLFVHWEKGRDVFDRLLIDSDWAINNSN  
WMWLSCSAFFSQYHRIYSPISFGKKYDPDGKYVRYFLPVLKDMPEYIYEPWTAPIDVQRKAKCIIGKDYPEP  
LVSHLGASKNCKEKIAAAYALNKQIKGERNQVQLQGVKKNSSDSRNTDDVIKQPPKKLRQKKLTSY

>Picea\_sit\_ABR17701.1\_unknown

MSTNCSIWFRDLRVEDNPALAAGVRAGAVIVLYIWSPEEEGQYYPGRVSRWWLKQSLAHLDDSSLRNLGARL  
ITKRSTNSISAILQVVQATGATQLFYNHLYDPLSLVRDHKLKQDLSSRGILVRSFNSDLLYEPWEVNDEEGHA  
FSTFQDYWNKCLNMPYDPLAPLLPPKRIVAGEVSNCPSSDDLNLDEDESEKASNALLARAWSPGWSSADKALTAF  
INGPLLDYAINRQKADSATTSLLSPHLHFGELSVKKVFHLLRIRQVLWANEGNTSGEQSVNLFKLSIGLREYS  
RYLSFNFPSSHEKPLLSHLNYFPWRVDSDFKSWRQGRGTGYPLVDAGMRELWATGWLHDRI RVVVSFFVKVL  
QLPWRWGMKYFWDTLDDADLECDALGWQYISGCLPDGREMDRIDNPQFEGYKFDPAGEYVRRWLPELARLPTE  
WIHPWDAPRAVLQAAGVELGSNYPLPIVEISTAKERLQEGLESEMWOREADARASLENGTEEGLGESLENANA  
SLPDQMDVDREPVRRNTDLAARSQDDQLVPSISNAVQRAYVGYTSLQAASSSPSEQAEVPSNTDSGIIASAASS  
QQFLVQSTWSMTRGLIEDLPNVTNDYPQMQLVDEQNESHSTADSSSILGRDDMSSGGIVPVWSQSLSQSC

>Pimephales\_prom\_KAG1937016.1

MVVNTIHWFRKGLRLHDNPSSLDSVRGADTLRCVYILDPWFAGSSNVGINRWRFLQLQCLEDLDASLRKLNLSRL  
FVIRGQPTDVFPRLFKEWKISRLSYEYDSEFPFGKDRDAAIKKLASEAGVEVFVRISHTLYDLDKIIELNGGQS  
PLTYKQFQTLISRMDFVEISAETITAEMVGKCVTLISEDHDYKFCVPSLEELGFETEGLESTAVWPGGETEALT  
RLERHLERKAWVANFERPRMNNSNLLASPTGLSPYLRFGCLIVKKNVPPSLYGQLLWREFFYTAATNNPHF  
DKMEFNPICVQIPWDRNPEALAKWAEGRGTGFPWIDAIMTQLRQEGWIHHLARHAVACFLTRGDLWISWEEGMK  
VFEELLLDADWSVNAGSMMWLSCSSFFQQFFHCYCPVSFGRRTDPNGDYIRRYLPILRGFPAKFIYEPWNAPE  
SVQKIAKCIIGVHYPKPMVNHAESRINIERMKQIYQQLSCYRGLGLLATVPFSTANNGDGNGAGPSSADIPO  
ESTRITVHPSRASSQPDFQPFVRVSCDQHPVNSVQPQPGVY

>Pimephales\_prom\_KAG1969196.1

MSANKRSLKRQRESASAGGKQPKSAGEKGEYGGKQPKPAGERGREPGWLLQEVSELRRAAQGCEFNKKRLRY  
LSNTQKIKQSGDGVLYWMSRDQRVQDNWALIYAQQALALAEKPLPHICFCLVPRFLDAAAYRQYAFMLKGLQEV  
KECKSLDIQFHLLSGEPGQNLPTFVKNNWFGAVVTDNFNPLRIPLQWIETVKKHLPSDIAFIQVDAHNVVPCWQ  
ASEKLEYGARTIRGITKLLPEFLTEIPLVDTHPHAASQTAKPIDWEEVLSSLQVDRGIGEVDDWAQPGTSAGM  
AMLESFIDKRLRLFATHRNPNPFDALSNLSPWLHTGQLSAQRVVRQVKREKNASESVASFTEELVVRRELADN  
FCFYNNHYDDISGAYDWAKKTLQEHSKDTRQYLYTKQQLENGKTHDQLWNAAQRQLVSEGKMHGFLRMYWAKK  
ILEWTASPEEALSIAIYLNDRLSLDGCDPNGYVGCMMWSICGIHDQGWAERP IFGKIRFMNYAGCKRKFDVAQF  
ERKYAAIKASV

>Pimephales\_prom\_XP\_039510234.1

MSVGKESISQVRELLRELMLGREDPDGCFCLCLSLLGDTDRTHFLDMIEPLSSGHEHLHSQTLATFLEYFSK  
DEADELELALTLSLNETKHIKTDFRQQNSVHEPHMPLCNKSYAEMTTGSSGGDQPKVNQPI TKWTLDTDEVHKT  
TCAIKNINKDNDLKVTSKRSQRRLRKKELLLLKNPSGPRPVLLWLRDLRIWDNPALIGCLELGAPVIPVFL  
WNAVEEEGPGVTVASGGASKYWLHQALVSLNLSLEQLGSHLVTLKGEPSLTAQGLIAETGAASVVATALYE  
PWLKERDDSVWETLEKQGVNCHIIYHSYCLRDYAVTTRGVGLRGIGSVSHFMSCCQQNPGSGLGAPLDAPGAL  
PAPSTWPQGCPLVDLELARI PRKDGTEIDWAVNIRKSWDFSEKGAQAHLEAFLRDGVYRYEKESSRADAPNT  
SSISPYLHFGQLSARHLLWDARGARCRSPKFQRKLSWRDLAYWQLCLFPDLPWESIRPPYKVLRWSSDRAHLK  
AWQRGFTGYPLVDAAMRQLWQTGWMNNYMRHVVASFLIAYLHFPWQEGYRWFQDTLLDADVAIDAMMWQNGGM

CGLDHWNFVMHPVDAALTCDPYGTYVRQWCPKALPDDLIHKPWKCPASMLRRAGVVLGGNYPERVVNTNLEE  
RRAQSLQDVASVRRFRQFIDQSRGCDLVPLPARLVQALGSMEDVVRHEGNGFLLPVITRMEFKHHSDEPDR  
QDNPNYAVLKGYSRKRDETIATFFNERDFTASVMCETAQRRERLERDCCLLEGLPQPTASRGRARPTPTRDPY  
SKVPGGVPIPHR

>Pimephales\_prom\_\_XP\_039522870.1

MSASRTVICLLRNDLRLHDNEVFHWAQRNAEHIIPLYCFDPRHYQGTHNFNFKTGPFRLFLLDLSDVKDLRAT  
LKKRGSTLLVRQGPEDVVGDLIKQLGSSVAVAFHEEVASEEKTVEKKLKDICCQNKVKVQTFWGSTLYHRDD  
LPFRHIGGLPDVYTQFRKVVEGQGRVRLSTPEKVKSLPLGLEGLIPTFEGLGQTEPVMDCRSAPFCRGGE  
TEALDRLKHIFYWDTNAVASYKETRNGMMGVDYSTKFSFWLALGCISPRYIYDQIKKYEARTANQSTYWVIFE  
LLWRDYFKFVGLKYGDRIFNINGLQDKQVSWKTDMTLFCAWKEGRTGVPFVDANMRELALTGFMSNRGRQNV  
SFLTKDLGLDWRLGAWEFELLVDHVDVCSNYGNWLYSAGIGNDPRENKFNMIKQGLDYDNGDYVRQWVPEL  
GGIKGGDVHTPWTLSNSALSHAKVLLNDTYPSPIVIAPEWSRHVNNKSSGSPSSAKGKRGSSTYPRQHKDRGID  
FYFSKKKGF

>Pimephales\_prom\_\_XP\_039533080.1

MSQNSVHWFRKGLRLHDNPALIAALKDCRHIYPLFLLDPWYSTNTRIGINRWRFLMEALKDLDSLLKLNLSRL  
FVVSGBPTEVLPLKLFKEWEITRLTFEVDTEPYRSRDEEVMKLAKEYGVEVPIPKISHTLYNIDRIIDENNGKT  
PLTYVRFQSVLKAIGPPKKPVPAPTKEDEMSGVSTPISEDHEEKFGIPTLEDLGLDASSLGPDLFPGGEQEALR  
RLDEHMQRPGWVCKFEKPQTSNALTPTSTTVLSPYVRSGCLSARTFWWRLSDVYRAKKHSEPPVSLHGQLLWR  
EFFYTAVGIPNFDMEGNPHCVQVDWHDNHEHLAAWREARTGFPFIDAIMTQLRQEGWIHHLARHAVACFLT  
RGDLWISWEEGQKVFEELLLDADWSLNAGNWQWLSASAFFHQQYFRVYSPVAFGKKTDKNGDYIKKYLPLKKF  
PAEYIYEPWKAPRSIQERAGCIVGKDYPRPIVDHEVVHKKNIQRMKAAYAKRSPEDKPITKGVKRKATSTVDQ  
LQKKAAR

>Pimephales\_prom\_\_XP\_039538549.1

MSHRTIHLFRKGLRLHDNPGLQALASSAVLFPFVLDLALLEETTAVAPTRWRFILQSLEDLDARLRALGSR  
LYVLRGSTATVLRDLVTRWSITRISYDTEVEPYHARVERDIQALAEERGLQTHTCVSHTLVDVQRIIQANGGS  
PPLTYKKFLHVLVSVLGEPEKPCRDVSAEDFLRCPTPADPELAYGVPSLADLGLLEVQSETLWPGGETHALHRLH  
THFQSQGWVSSYCKPRTVPNSLLPSTTALSPYLSLGLSVRSFYHRLASVYAQSKNHSPPVSLQGQLLWREF  
FYTVAATPNFTKMEGNPICLQIRWYHEPESLEKWRARTGFPWVDAIMTQLRQEGWIHHLARHAVACFLTRG  
DLWISWEEGMKVFEELLDADYSLNAGNWMWLSASAFFHKKYTRIFCPVRFGRRTDPQGGYLRKYLPLVKNFPS  
QYIYEPWKAPKDVQLSAGCIGKDYPCPMVCHTEASQRNLGLMRQVRTEQQKTAELTRDVTDDPMEAGLKREL  
QEEEEELLEGAEPHRGVKRLSGSSDQKSRPSSWTPETVRLSEDVT

>Piptocephalis\_cyl\_RKPl3396.1\_photolyase

MSTRGKRSESTQTSTDPFRSKGAKRVKEDEANRTLWFRDRFRLHDHMLARASASTPASQSHLLALYLISPE  
EWIDHDEAPIKVDFWLRLALPILRKDFALHIPLIIRTLDRAGQHADVILDVCKQYRISAVHWNREYEVDELA  
RDASVQQLQTHDRQVYQHHDQCIVPPGQVLTAKGTTSKVYSSFRNSWYTVVARNPSLLKESRFRPRANEPSAL  
RELHEAFEDGHIPESLDQFPLAESARERARRDFPVGEEEAKKRLHAFIQKKMGMYGENRSSALQGTSLSPY  
LHSGMVSARSCIREAKEANGNRLEGGMAGAVNWMAEVVWRDFFRHILVAHPKVSQNPFKAFTTRFPWASDSG  
DRSFQAWTQGRGTGPIVDASMRCLNTTGWLHNRSRMVVASFLCKDLLVDWRKGERYFMQHLLDGDLASNNGNW  
QWVAASGTDSPFFRIFNPARQSQRFDPDGAFIREWVKELRDCPKEDIHAPSASIAQRLKYPEPIVDHASKARD  
RALKAQQMRSAS

>Pityrogramma\_aus\_AAQ18175.1\_type\_II\_CP

MEEEAEVHADGPVIVSTEVNPGRVRLKQASQEVVQGGPVVYMSRDQSRSDNWALLYAAQCAQQQGGPLCV  
AFNLVDSFLHAEARHFGFMLRGLRVVHNLSSLGIPFFLLRGKAEENIPAFVERCGASILVMDFSPLRIGRVW  
REGVCKAVPSSVSVEVDADHNVVPVWVASDKQEYAARTIRGKIQRHLPEYLVEYPPLVAPIHTWTLEKPANID  
WDLIDEVAKKGAEGLEVWKCESREDAAMELLLGKKKGFLTTIRIRNYADDRNDPSKPAGLSGLSPYLHYGQVL  
KKKGFLTTIRIRNYADDRNDPSKPAGLSGLSPYLHYGQVLAQRCALEGRKLRRSHTKAIDTFLEELVIRRELAD  
NFCYYQPNYDSLQAYEWARSTLLAHASDKREHLYTQEELEKGTDELWNASQLEMVHLGKMHGFMRMYWAK  
KILEWTGGPEEALAVAIYLNDDKYELDGRDPNGYVGCMMWSICGIHQGWQERPVFGKIRYMNYNGCKRKFNV  
YIQYVKRMVAELKRAAKDPAKIPPSSTPAKIDILE

>Plakobranhus\_ocel\_\_GFO07232.1

MAAANLKYGICLFRNDIRVDNEALFLANQSDFLIPLYCFDPRHFHKGTYHFGFPKTGHHACFMIDSVQDLR  
SSLQSLGSNLLVRQGPQVVDLIRSLDLKNVTVFLQDESMDEEKRVENAIRSKSSVSVTSIWGHTLYHVED  
LPFQPKHLPDVYTEFRKRVEGRASIRKCTMPPSLKPLPTDLEEGNIPTMSDLGLPVLQKERSVFPFKGGES  
SGLNRLQDYLWGTDHVSTYKETRNGMIGSDYSTKFSFWLAHGCISPRKIYWEIKKYENERTSNQSTYWVIFEL  
IWRDYFRFVGLKYGNQLFHPGGIRGNEVNWRSNAQFSAWKEGKTGVPYVDANMRELAATGFMSNRGRQNVAS  
FLTKDLKLDWRLGAWEFESLLLDHVDVCSNYGNWLYSAGLNDPRENRKFNVVQGLDYDGDGDYVRLWLP  
GVTGTGVHCVWTLSPSVLEAANVSLGETYPSPVMAPEWSRHVNRPSTSSMSGSGKRTGAPGSARGKGQSSSY  
RGHGSQAQYPGQKRIGIDFYFSSSNKR

>Plakobranhus\_ocel\_\_GFO20146.1

MDSKETDSSQADEGKKDSHITVHWFRHGLRLHDNPALLEGLKNCKEFYPIFILDGHVAGVSTAAFFPRMQFLFE  
TLEDLDNNLQALGTRLYFLKGDPEVEFEKLFEEWDVTRVTFEQDPEPIWQDRDSRVKELCNLRGVEECIEKVGH  
TLWDPHVILQENGGNPPLTYAAFNQVVGIVGLPEKPLPNPDFEGISLPVGEDHDSKYGIPSLKSLGVEPESAE  
QASPHGRYLGGGETKALKLLLSRLEKERKAFELNLSLPNQLYPDLVGMPMSSLSPLHRFGSLSIRKIFYWALRCTY  
AQVHPNSPIPKSITSQLVWREYFYCMSVNPNLYNRMEGNPICLRIDWYNDEEKFKLWKEGRTGFPWIDACMRQ  
LVQEGWIHHVCRHAVACFLTRGDLWIDWQKGLEVFDRYLLDADWSVCAGSWMWVSSSAFEKVLQCPRCICPVR  
YGRMDPTGNYIRRFVPELKDMPLRYLCEPWKAPQKVQEDANCVIGVDYPLPMVNHKDASKECKEKMDRIKNL  
CKDIPHMAPTNEVLSYMWLDKSNSSGAMEESLFEACSHLSSVAL

>Plakobranchnus\_ocel\_\_GFO20945.1

MSQKCHKAIHWFRKGLRLHDNPAFIEACKDASELYPVFVLDPWVFTNANVGANRWRFLAQTLDNDLNNLKS  
LRLFLVVRGNPEIELEKLCCKWEITKLTYEVDTEPYAVARDKCVLDKMDNLGVSVVKCISSHTLFDIHKVVVNG  
GKAPLTYQSFQTAAARMGPPAQAVASPTLQDLQGCRTPIADTHDKEFGVPTLKDGLICSEDLPNLFQGGETE  
ALERMERHLKKVNWICAFEEKPKTEPNLSVPSTTVLSPYLKFGCLSRLLYHKIIQVYKGGKHSQPPVSLLGQV  
LWREFYYTVAAVTPNFDKMEGNPVCKQIPWQENSEHLDWKMGRGTGYPFIDAIMIQLRQEGWIHHLARHAVAC  
FLTRGDLWISWEEGQKEFEKLLLDADWSLWAGNMMWLSASAFFHQYFRVYSPIAFGKKTDPNNGDYIRKYLPVL  
NKFPAKFIFEPWKAPLTMQQAASCIIGKDYPKPIVDHDTVRQKNIQKMAAAYAKSKNGASNDVKDLATSKKRP  
SSDASNSPVKKKKKA

>Plakobranchnus\_ocel\_\_GFO43536.1

MDSAPENNAEQSSGTLTPSPTLKKHALFWFRKGLRLHDNPALIAAIQGSATYRCVYILDPWFAGASQVGISK  
WRFLLESLEDLDSSLRKLNSRLYVVRGQPADVLPRLFQEWSITTFAFEEDSEPYGKERDAAISALAREFNIQV  
ISKSSHTLYDPKVIVIAANGNSPPLTYKRFQSILSTLPPPEKPCETLSAFVSSVTTVPVSHDNDKFSVPSLDE  
LGFDTDSLVPATFRGGESALARLNRLERKAWVASFEQPKMKPQSLYPSGTGLSPYLRFGLSPRTFYWKLT  
ELYKRVKKGVDPLALHGQLLWREFFYTATNPNFDRMVGNSVCVQIPWDHNPEALAKWAEGMTGFPWIDAI  
MVQLRREGWIHHLARHAVACFLTRGDLWISWEEGMKVFDMLLDADWSVNAGMWWLSCSAFFQQFFHCYCPV  
AFGKRADPSGDFVRHYLPVLKGMPTQYIYEPWTAPESVQKAAMCIVGKDYPLPMVQHSVVSQINLERMRQVYK  
RLVLKSSARNRMFSGLPKMPKVDIFLTQVKMFLSTSSDEEVSQKQRRRSKHINDC

>Plakobranchnus\_ocel\_\_GFO45498.1

MAEQEEFAISADLVNKLKRLSTSYRAQVAYRQIKTASNLMAEEGSSKEEIKAAAGESSTKTKEKAAKPTKGEKK  
EKSSSNEKDQKEVKDKQKPKNAERPVRNVEKRKAESLQEESPAKKLKAENGASEPEPTEDVDKMESDDFIKK  
IDQRRKDVCEDVSKFKFNKKRVRLSEEDFSDENGVVYWMSSRDQVQDNWAFLYAQLAMKLEVPLYVCFC  
LVPKFLDATHRMFDFMLKGLAHVEKECRNLNIPFYLLYGDASKAIPFLKEHNIGGVVTDFTPLRVPKWVED  
LKNALPSDVPLCQVDAHNLVPCWEASPKLEYGARTIRNKIHNQLGQFLTEFPPLVKHPPPKMPSNIDWKA  
DATLQVDRSVAEVTWAKPGSEAAKYTLQSFCEKRLKHFAFTRNDPNKQALSNSLPWIHFGQISVQRCVLTVRL  
YRSKSSSVNAFIEEAVIRRELADNFCYNNKHYSIKGAYDWAKSLALHKGDKRPYLYTRDQLETSQTHDDL  
WNAAQFQLVLEGMHGFRLMYWAKKILEWTTSPPEALAIISIYLNKYSLDGRDPNGYVGCMMWSICGIHDQGWA  
ERAVFGKIRYMNYQGCKRKFDPVPGFVLKYYYYKKMEMKK

>Planoprotostelium\_fun\_PRP73543.1\_PROFUN\_025

MKHVTHNGNSNIMPPRVIYWFRTDLRLHDSPLSKALELEPECLYPVWTWDDHYVFHARVGNRWQFLDSSQS  
QLSENITKINPKSKLHVLGRGPPQLPIPIVVKQWKITHLVFEKDTDTYGRSRDDQVMMMRKLKVEVISVSGRT  
LWDVDEVLRNKGKPPNTINALSKITEKMGPPEHPLPTPSLPDPGDLDLDESQSVDDAEDLNAEQREKPAV  
CYDSIRGPKGDFSVPTFEELGLKPATSPWRGGESVALKMLTEYTDIEKTAKFSKPDTPPTQFLPPATTNLSA  
HLHFGTSLVRTFWYKVEESVAKFKGKSSFTNLPGQLMFRDMYFCCQAGWENFERMEGNKECRFIPWALRNS  
YVLSHTYRTSHVISYDEEGRVNGQERDGEAEWFTRWKEGRTGFPWIDALMRQLKHEGFIHHLGRHSVACFLT  
RGHCYISWERGQEVFEWLIDHEAACNSGNWQWLSASAFFHQYHRVYSPIAFPKKYDKTGRVLVRHYCPELSKE  
PDKYIYEPWRAPKAEQKAAGCIIGEDYPLPMFDEGERRKRCLDAMGHAYKGVGDERLRDGSWRELFPVVKVK  
EKVKEEKGGKVKEEKVKEEKGGKVKEEKEERGKKRGTLDYVSKKEEEEEEEEEEEEEEEEEEEEEEEEEEEEE  
EEEEERGGKRGKDKKEKEKLASMGPSKPKRRKR

>Planoprotostelium\_fun\_PRP73583.1\_cry\_DASH-1

MADNNQSFSLVWFRGDLRLHDNEPLTMAIKSQGRILPFYCFDVRQFGPTYSFSGFPKTGPFRAEFLLIESVQCL  
RDGLRKLGSDLIVRVGKPEEEIPKLIKSLNVPVTHLFGQKEITSEETDCEKSVHRAHGKLDKKVESKLVWGGQ  
TMHHIDDLPFQVEGGHPLKVFTHYRTMMESKNISVRQFPFSPSKLQSLPKTGKEDREVSVDLPDLQDMAIG  
NFGKWLQDQHVQRPDNYKGEIVKEGPTSNSSKHHRDPAQVMTGGEVAGLKRHLHFYLVWEGRHIDTYKSTRNGLG  
STYATKFSPLWATGCLSVRQIYHEIKKYESKHANDSTYVTFELMWRDYFKWVGLKHKNIDFKLYGLKGEKK  
DEQREWKDVSTFEMWARCKTGYPFVDANRELATGHMSNRGRQNVASFLTCKMDKMDWRMGAEFFESFLIDH  
DVTSNYCNWLYVAGVGNDPENRYFNVVKQGHMYDSKGEYVCYWFQPKLKLDPADHMMQPFYKGPGEFTFSLD  
RDYCEPVVKVNFKEGGDHHRSHGKKDFKIKRGGHGGRTVRDGPQHSSTH

>Planoprotostelium\_fun\_PRP75200.1\_PROFUN\_159

MLSVKCCYSLYRYGVIQVLCVSSASFKNGLFDSGSDVDLTMPGEENLLLRKTRGKNIMPATRGKRKERSPTES  
EKDPHKEEASNAQKSSRSESEKKAPKLNQEESEKGRAKRYERSNNTNNTSHPRLGVKAREKQGMYNKNAQKG  
EPDPTAIGGSFEGTPLDELEKVMKKSEVEFKKAKNGNVLMMWIRNKDFRAFERASQAAKSMGTHVIALHVISPG

DYKSHGRGARRIDFMMRNVKELRSELKEKNIPLVVRTITPRKTVPKIISFCDEFNITKIYANIEYEVDELRR  
DAVVVHLARESGKAAFFVHDCIIVPPGMLLTKEGKPYSVYGPWFKKWVETVNENDNLLTSEDPEANDESVRK  
DKSLHSLFEEEEIPSEVEGYECADAEMAQLWPAGYHSARESLEGRFLEGKKGKEADDIFQSSKVKEKKAIVENY  
PEGRNRDPDVGTSRLSPYLAAGVISPREVVQKARKMNKGSISQGGKENGFSNWISEVAWRDFYAHVIVAWPRV  
VMGRAYNLAMESVCWEYEEDQVKAWKEGNTGYPIVDAAMRQMRETGFMHNRCRMITAMFLVKDLMVDWKNEVG  
EAYFMQHLMDADFASNNGGWQWSASTGTDPQPYFRIFNPFSQSEKSAQSYSDPDGAYIKRWVPELKSLSGKAL  
HDPFHKLDKASFKKLGYPEPIVDHNEARKRALRRFKTPGEK

>Plasmodium\_viv\_SC067762.1\_photolyase

MKEQAGITSEPGEVPNERGRNTLLVSERGKEPNAHSEGPPTDPRGETHEEKQPLRQEVPTRSITTGEEEEKNK  
NKKKKKKTEHVIKENTKSDIKGEKTNKESPKMNRPEDQNGKGANLDEETFVKKAPSDDLLIPGEGRASKMGT  
NKAQTSKGEEKSKLAKLTCLMQGRGSKQDEVGRMGNPVRGKNGSLGRGGGQVSGKDGSLESKNRLVERRNGSA  
RTPKGSGLGSSGGLKNSPAGCSGGPKNSPAGFSPNSAPRSTSKFVSKSAPKLASKLAPKLVSAPKLAPKLAP  
KSTLNSAPSAPKHTPRSGPASAPTLNRFKASLKKVPPSTPQKPKGKTNFSPVHPPLRKESSTPRGSEDQQRK  
NPYETSREKKLTILAKVRCLTSFESGAESGGGGDAAKMRCSAESSGGGDAAKMRCSTEGSGGGGDASNPPSI  
PPGEEPNNHASPTSIPHGEEPNNHASPTSNPSSAANEQRDALLLLLTDRFRANDNWALTYAYELAKKKGLNLIAC  
TYLNRKEKLTSRFINAKLKVLKNLEQALKQMNIPIFYILPLFMIDEFKEFIKTHHIKVIACDLHVLNDERAFIK  
SLCHICNKRKVKVFQVDSHNVIPIWVTSKGEECSVRTIKPKIQALLPTFLTEYVLLSPFEQKIKFPEPFDMEE  
VASKLTVTNTCAVVGAVFTEKKAQELLSHFQVLDKYNVKNRNDPNSDAATVLLPYVMGVISAQRCILEVH  
KHAYSNPSINAVSGKESFTDDFIMRKELADNYCYNRYCTFEGGRDWAKESLKKHDADKREYLYDYEDFRTA  
KTHSDLWNCCQLQLIDEGVMHEFLKVYWAKKILNWSANSQVALKYAMQLNEEFSIDGKTPSGYVSIMWSIMGV  
HDQGWNERNIFGKVRFINSGCKRNFDMMFMMSKYPKGKENASIVKKIPTITFASYLKKRKHGPAAPLQESTR  
EKRGGRGPAP

>Plasmopara\_hal\_XP\_024571475.1\_dna\_photol

MKVLVWFRDLRLHDNLALHAALQHIEKHKNKDDVEFIPLYITHRPQIMRCGAHRFQFVLESVEDLSRALEER  
GSKLVVAKGDGLQVLQRLPAWSITHLFFDRVCEPYAVERDNRALELAKSLGIKTHVTNGYNLYDLDDQVISSQ  
SNKAPKTYRAFLKAVGEQSLPSEPLPTPEKLPSPMRKHHELYQQVVEYWNCEMSDDREKEDDPKEKKKKQIEQ  
IAGPKHDFTVPDLAFFDYETPEKHSFIYGGEQKALKTLTDNYCKDEDRVARFEKPKTSPAQPPTPTSTTVLSPY  
MFYGCLSPRTFYHRVQDIQKRRKKGSPPVSLIGQLLWRDFYHCHGHDNPYFDKMEESPTCLQVNWRHYHTIPE  
NEEEMSDDKLARSQFEAWRDGRTGFPWIDAIMIQKKEGWMHHLARHAVACFLTRGDLYISWVRGLEVFQER  
LIDHDWSVNAGNWLWLSSSYFFTSYFRVYSPISFGKKSDEGLFIKKYIPALKKFKPAKYIYEPWKAPKSIQQD  
AGCVIGKDYPTPIVEHKSAMQRCKEGMKMSYANKEYGTPPSNKSNRRSKKRQREDSDEE

>Plasmopara\_hal\_XP\_024580044.1\_photolyase

MATVFRALEKLKLPGLHRERIQWLYEGATLKSDGSYLLYWMQTSVRTKQNYALEYAVAAANELKVPLHVVYL  
FPDRSVLPALQSSKGDEWKAEALQDANAHAFATERHALFALEGLADVHQRLVGRGLSFDVFHHQQNKKRLARN  
ELLEICARKAALVVTDRPYLRPWSALDNLVSSVEDQGANYGIVQIEGDVVVPVAEVTDKKEFSARTIRPKIM  
KLVDYRVASLEVMPDKVCKTEGQTLAILEKPEQLKVLDTVSPVAVDKTLQLLDVDHVSXSVGWVHFKGGEVA  
ASACAKEFLTPDKLASATERNEPSLDAGSDLSIYLRHGHCIVVRIVLAAQKLKKVAKAKEGLASFLEELIVR  
RELSLNLVTFNHQNYDSMRCLPKYAQTTLKDHDIDKREKIYSREELESYQTEDRFWNVAQRELVTGKMHGYM  
RMYWGKKLLEWTRTPEEGFHAALVLNNKYALDAPDANSYAGVAWTFGKHDQGWREPIFGKVRYMNETGLKRR  
FRMDAYVHKVGRLLAAQAKKASKGGDLDDDEKHSSSSVGHHKDDASIGKWEQN

>Platynereis\_dum\_AEJ87227.1\_putative\_1

DGEVAGTKLVSYPRMKFLLLECLKDLDLDDSLKKHGGRLYVVKGPSDVVIKQLIEEWGVTRVTCEIDPEPIWQPRD  
KAVKDLKATKGVKWFYDYNHLLWDPKAVCDANGGRPPHTYKLCFQVTDLLGKPPETPHDPDFSHVQMPVSDDF  
DDKFGLPKTLKELGCEPECEEQEKPFNKWQGGETGALELLETRLMIERAYKAGYIMPQYIPDLVGPFRSMSP  
HLRFGALSIRKFYWDLHNNYAIEVCGGEWLGALTAQLVWREYFYCMSYGNPSFDKMEGNPICLQIPWYKDEEAL  
EKWKQGQTGFPPWIDACMRQLRYEGWMHVGGRHAVACFLTRGDLWISWVDGLEAFYKYMLDGDWSVCXRQLDVG

>Platynereis\_dum\_AGX93012.1\_tr-cry

MWQQQIFSPNTVVEGKNIVHWFRKGLRLHDNPALLEALKGASTWRCIYILDPWFAGSSQAGISKWRFLQLCLE  
DLDAASLRKLSRLFVVRGQPADVLPRLFVEWSVKVLSFEEDPEPFGRERDAAICALAQEAGVDVNIRTSHTLF  
APQKVIERNQGVPLTYKRFQSIAGMEVPCQPCNPTEMVMNCRSPTNDDHDETYGVPTLEELGFDTDGLR  
PAVWKGGETEALSRLDRHFERKAWVASFEKPKMTPNSLLASPTGLSPYFRFGCLSPRLFYWRLTLEYRKVKKR  
QDPPLSLHGQLLWREFFYVSTNNPKFDRMQSNPICVQIIPWDKNPEALAKWAEAKTGLPWIDAIMTQLRQEGW  
IHHLARHAVACFLTRGDLWISWEEGMKVFDEMLLDADWSTNAGSWMWLSCSSFFQFHTYCPVNFGRKRTDPN  
GDYIRRYLPVLKGFPAFYIFPWTAPESVQRAAHCIGKDYPLPMVNHQEAASRINMERMMQVYQQLSPRAGHL  
GRLMLRGRSNLADPRLKTDKFGIPMTGNKPSKALVRPRLDTQYLSATATTAVTQSSSDSETPTNSSNQLNLRN  
K

>Platynereis\_dum\_AGX93015.1

MPEVAKSSIHWRKGLRLHDNPALLKAFENANEVRPIFILDWPFVKKGRVGINRWRFLIQTLRDLDTNLKELG  
SRLFVVRGNPLDELPKLFKEWKVDHLTFEVDTEPYAKERDEKIEELASELGVKVSKIVSHTLYDTQRTIAKNG

GTAPTSYQRCLTVLSQLGPPAKPAPKLSAEHIKDCKTPIGSDHEEKYGVPSLAELEKKESDCGPSLFPGGETE  
ALSMEKYLLKTSWICKFEKPEPTEPNSLAPSTTVLSPLPEVWLRLSENILLES  
>Platynereis\_dum\_AIE45779.1\_cry,\_parti  
HYEHQKWSNDQSHLKAQKGNTRYPLVDASMRQLWLTGWMNNYMRHVVASFLISYLRHLWHIHYEWFQDTLVD  
ADVAINAMMWQNGGMSGLDQWNFVMHPVDAAMTCDPKGNYIRKWIPELAALPDEFIHI PWKCPPSILRRAGVS  
LGGNYPQRIIIDLETSREQSLKDVTVEVRRKFRGRDWVDKITGNDLVPLPNGLKIPCI TRKEFKYKTANPESREN  
PHTAVLRGYRSRKRDKIAFENKVDFLASTMNECVLRQER  
>Platynereis\_dum\_AIE57497.1\_CPD\_photol  
LCNFGGKLTARKSCHLRFRQSPGPVIYNKKKMSEPPAKKIKTEEEKVEKDFLQKIENQRRDTAKSVADFKFNK  
KRVRVLSSQQEFPDENKGIVYWSRDQRVQDNWAFLYAQKLALKAEVPLHVCFCFLVPKFLEATIRHYGFMLKG  
LREVEEECRKLDINFHLLIGYAKDKLPEFVKEQKIGGVVTD FSPMRVPAGWVNEVKLLPKDVPFCQVDAHNI  
VPCWEASPKLEYGARTIRSKIHKVLSTYFTEFPVIRHPHKATAKPEPIDFEAVQESLDVDRTVGEVDWVTPG  
TTGGLRNLESFIKQRLKYFNADRNDPNKNALSHMSPWYHFGQVSVQRGMLMVRQYRNKYKEGVEGYIEEGIIR  
RELADNFCYYNENYDNIDGAYEWARKTLNDHKDKRTHIYSREQLEKAKTHDDLWNAAQMQMVTEGKMHGFLR  
MYWAKKILEWTESPEKALADAIYLNDRFNLDGRDPNGYVGCWWSICGIHDQGWKEREVFGKIRFMNYKGCQRK  
FDVAAFVRKYRAKKI  
>Platynereis\_dum\_ARB18112.1\_CryDash  
MSKPRVIICLLRNDLRYLDNEALLWAHRQGTHVLPIYCFDPRHYKGTYHFSLPRTGPHQLKFMLESIRDLKST  
LQKHGSDLILRQKPEVIVPAIIQQIGKENVSALVLQKEVTDEEVKVEEGLKKSCGVQLQTIWGATLYHLDDL  
PFKPQRLPDVYTQFRKTVESQGRVRPLVEMPETLRPLPEGVTS EDVPTATQLGCQESTFDESAFPFTGGESS  
ALARLKS YAWETDAVAKYKETRNGLIGHEYSTKFSSWLAHGCISPRQIYWEIKNYESQRVANQSTYWVIFELL  
WRDYFRFVGMKYGNKLFFEGGIFGKQIPWKRDENL FKAWEKGRGTGVPFVDANMRELAATGFMSNRGRQNVASF  
LTKDLKLDWRMGAEWFE SMLIDHDVCSNYGNWLYSAGIGNDPREDRKFNMIKQGLDYDAEGDYVRLWVPELKG  
IQGGQVHTVWTVGKILERAGVSLGETYPMPIVQAPPEARHFGKTGGARAKSGRGPPTKQNRGIDFYFKST  
>Platysternon\_megacephalum\_TFK00652.1\_Cryptochro  
MPNMPHRTIHLFRKGLRLHDNPTLLAALESSEVSLEDLQRLNLTKLASCLLVIQGEYESVLRDHVKKNITQVT  
LDAEIEPFYKEMERTIQVLGGEMGFDVLSLMGHTLYDIRWILDMNGGTPLTYKRFLHILSVLGD PMPVRNL  
TAEDFQRCKPPELRLAECYRVLPEDLEIPRESQSPWRGGETEGLQRLEQHLKNQGWIANFTKPKTIPNSLL  
PSTTGLSPYFSLGCLSVRSFFYRLSNIYAQSKNHS LPPVSLQGQLLWREFFYTASATPNFTKMAGNPICLQI  
NWXQDAERLHKWRMAQTGF PWIDAIMTQLHQEGWIHHLARHAVACFLTRGDLWISWEEGMKVFEEMLLDADYS  
INAGNWMWLSASAFFHQYTRIFCPVRFGKRTDPEGQYIRKYL PVLTNFPSKYIYEPWTAPEEAQKQAGCIIDY  
PLPMINHKEASDHNQLMKQVREEQYGTALTRDDMDPMEMGLKRESEENS KKGKHARNREQT  
>Platysternon\_megacephalum\_TFK04765.1\_taste\_rece  
MGVNAVHWFRKGLRLHDNPALRECIQGADSVRCVYILD PWFAGSSNVGINRWRFL LQCLEDLDANLRKLNSRL  
FVIRGQPADVF PRLFKEWNIAKLSIEYDSEFPFGKERDAAIKKLASEAGVEVIVRISHTLYDLDKI IELNGGQP  
PLTYKRQFTLISRMEPLEMPVETITA EVMKCTTPVSDDHDEKYGVPSLEELGFDTDGLPSAVWPGGETEALT  
RLERHLERKAWVANFERPRMNANSLASPTGLSPYLRFGCLSCRLFYFKLTDLYKKVKKNSSPPLSLYGQLLW  
REFFYTAATNNPRFDKMEGNPICVQIPWDRNPEALAKWAEGR TGFPWIDAIMTQLRQEGWIHHLARHAVACFL  
TRGDLWISWEEGMKVFEELLLDADWSVNAGSWMWLS CSSFFQQFFHCYCPVGFGRRTPNGDYIRRYLPILRG  
FPAKYIYDPWNAPESIQAACVIGVHPKPMVNHA EASRLNIERMKQIYQQLSRYRGLGLLATVPSNPNGNG  
NGGLMGYS PGENISGCSSASGAQMGSNDGHTVG VQTCSLED SHAGSSGIQQHGYSQGSSILHYAQGDRQQSHL  
LQQGRTGSTGISTGKRPNPEKETQSIGPKVQRQSTN  
>Platysternon\_megacephalum\_TFK06320.1\_suppressor  
MKHISIHWFRLGLRLHDNPALLAAMTDCRKL YPIFILDPWF PKNMRVSVNRWRFLVESLKDLD ESLQKLNSRL  
FVVRGRPTEIFPVLFKWKVTRLTFEIDTEPYSRQ RDSEVVR LAAEHGIQVIQKVSNTLYDTRVIAENNGKV  
PLTYVRLQTL LAAALGPPKRVPAPTLENLKDCHTPCKDNHDAEYGIPTLEELGQDPEQAGPRLYPGGESEALC  
RLDLHMNRMAWVCNFQKPQTEPNSLNPSTTVLS PYIKFGCLSVRTFWWRLAEIYQGRKHTNPPVSLHGQLLWR  
EFFYTAGAGIPNFNKMEGNPVCVQVDWNNPEHLRAWSEGR TGYPFIDAIMTQLRTEGWIHHLARHAVACFLT  
RGDLWISWEQQQKVRHVARGSAEMVGGQLDLHG  
>Platysternon\_megacephalum\_TFK15166.1\_BT B/POZ\_do  
MAAAGSTPVGLARSVHWFRGLRLHDNPALQAALRDASSVRCIYILD PWFVAVSSAVGINRWRFL LQSLLEDLDN  
SLRKLGSCLFVVRGQPTDVF PRLFKEWGVT RLTFEYDSEFPFGKERDAAIVKLAK EAGVEVVIENSHTLYDLDR  
I IELNGHKPPLTYKRQFTIISRMELPKPVSSITSQQMEKCKSEIQENHDDTYGVPSLEELGFP TDGLAPAVW  
KGETEALARLDKHLERKAWVANYERPRMNANSLASPTGLSPYLRFGCLSCRLFYRLWEL YKKVKRNNTPP  
LSLYGQLLWREFFYTAATNNPKFDRMEGNPICIQIPWDRNPEALAKWAEGKTGF PWIDAVMTQLKQEGWIHHL  
ARHAVACFLTRGDLWISWESGVRVFD ELLLDADFSVNAGSWMWLSCSAFFQQFFHCYCPVGFGRRTPSGDYV  
RRYLPKLKGFP SRYIYEPWNAPESVQAACKCIIGVDY PKPMVNHAETSRLNIERMKQIYQQLSRYRGLCLLAS  
VPSCVEDLSSPVT DPTSGQGSSTSTVQRL LHCGQTS PKRKHEGVEELCTEELYKRAKVTGLHISEIPSKNL  
>Platysternon\_meg\_TFK04422.1

MSGAAPRTVICLLRNDLRYHDSEVLRLWAQNNADYVIPLYCFDPRQYLRTYYYYGFPKTGPHRLKFLLESVKDLR  
QTLKKKGSNLVVRKGNPEDVVHDLITQLGTVAAVAFHEEATKEELDVEKALQRVCAQHGVKIQTFWASTLYHR  
DDLPRHISRLPDVYTQFRKAVEAQAKVRPTVQMPDQLKPLAPGVEDGCI PVPEEFGQKDPLTDPRTAFPCSG  
GETQALMRLQHYFWDNLVASYKETRNLIGIDYSTKFAPWLALGCISPRYIYEQIRKYEKERTANQSTYWVI  
FELLWRDYFRFVALKYGTRIFLLKGLQDKDVPWKKDPKLFDAWKEGRTGVPFVDANMRELAATGFMSNRGRQN  
VASFLTKDLGLDWRMGAWEFYEYLLVRPNSTCDWGGLSFSLQVADNRPPCMGLKGTEPLSSIPALLEEGSYNL  
VRSE

>Platysternon\_meg\_TFK04899.1

MSQKSRNRQARGGEEI SEDAAATPGAAAAPRGQLKGKRKVLAEPSGAEALTVDKRRKEGEGAEGAGAGSLGEAV  
RQARLRVAPSVQDFKYNKKRVRLVSQGSCLKDAAQGVVYWMSSRDQRVQDNWAFLYAQRLALKQQLPLHVCFC  
VPKFLEATIRHFGFMLKGLQEVAEECQELDIPFHLLIGFAKDVLPAFVMGRGLGGVVTDIFSPLRVPMQWVEDV  
KERLPGDVPFVQVDAHNIVPCWVASDKQEYGARTIRRKIHDLSEFLTEFPPIKHPYPSTAPAEPIDWNACR  
ASLQVDRSVKEVTWATPGLAAGLAVLESFIGERLKSFGTDRNNPNRAALSNLSPWFHFGQVSGQRAILEVQKY  
RSKYKESVDGFIEEAVIRRELADNFCYYNRNYDKVEGAYDWAKTTLKLHAQDKRSHLYELEPLEEGKTHDPLW  
NAAQLQMVHEGKMHGFLRMYWAKKILEWTRSPEEALKFAIYLNDRYELDGRDPNGYVGCMMWSICGIHDQGWAE  
RAVFGKIRYMNYAGCKRKFDVGGQFERRYDPCKLGQ

>Plectropomus\_leop\_XP\_042341943.1

MAHTCIHWFRKGLRLHDNPALMAALRDCKELYPVFI LDPQLHNKTLVGINRWRFLIGALKDLDCSLRKLNSRL  
FVVRGKPEEVFPKLFNDWKVTKLTYEYDTEPYSLSRDKTVTMLAREHGVEVIYKISHTLYDIERIIEENNGKA  
PLTYNRMQAIVKTLGPPKKPI PAPTME DLKDVKT PCSENHEKKYGI PKLEELGHSDTAGLEEEFPFGGEQAL  
RRLDEHMERTAWVCSFEKPQTS PNLSPSTTVLSPYVTFGCLSARTFWWRLTHVYQGKKHSDPPVSLHGQLLW  
REFFYTASVGI PNFNKMEGNPVCTQVDWDTNP DYLA AWKEARTGFPFIDA IMTQLRQEGWIHHLARHAVACFL  
TRGDLWISWEEGQKVFEELLLDGDWALNAGNWQLSASTFFHQFFRVYSPVAFGKKTDKNGDYIKKYLP LLKK  
FPAQYIYEPWKAPRSVQQAAGCMVGKDYPHPIVQHEVISKKNIQRMKLAYSKRNSDPAESPSKKQGVKRKAPS  
VVDMLKKKNKTM

>Plectropomus\_leop\_XP\_042351757.1

MVVNTIHWFRKGLRLHDNPALRDSIWDADTLRCVYI LDPWFAGSSNVGINRWRFL LQCLEDLDASLRKLNSRL  
FVIRGQPTDVFPRIFKEWKITRLSYEYDSEFPFGKERDTAIQKLASEAGVEIMVRTAHTLYNLDKI IELNDGQS  
PLTYKRQFQALINRMDAVELPAETITLDVIRKCATPI SEDHDDKFGVPSLEELGFDTEGLTTAVWPGETEALM  
RLERHLERKAWVANFERPRMNANSLASPTGLSPYLRFGCLSCRLFYFKLTDLYRKVKKNSSPPLSLYGQLLW  
REFFYTATNNPCFDKMEGNPVCVQIPWERNPEALAKWAEGR TGFPWIDA IMTQLRQEGWIHHLARHAVACFL  
TRGDLWVSWEEGMKVFEELLLIDADWSVNAGSMMWLS CSSFFQQFFHCYCPVGFGRRTPNGDYIRRYLPILRG  
FPATYIYDPWNAPEEVQKAAKCIIGVHYPRPMVNHA EASRINIERMKQIYQQLSCYRGLGLLATVPANPNNGA  
NGSNVGGVNTGTSQDPGTSSEGVS TYKGMSRTDRGVSTQKRRHEEASSKGSSKLWKQSK

>Plectropomus\_leop\_XP\_042352682.1

MPPSAAAGTEDGKVLVRKILREVLVGREDPGFFAMCVSVLGHQETRSQFMSLIQPLSSANSTLHSALTSIYK  
EYFSQTEDELELALALS LEMKD HNSQESRPQQPGDRLNQR RFVQLTSVSTPQASSLRKENTNSAQSGPWVK  
MSPPHTTKETELQKSTHVETPGTKNVCVSTPSGSFSKQDTVEKHDQMIDEGDLNQSDKPKRSKNRRQRRKGTG  
QHVVGLPVSPSATPPVLLWFRDLRLGDNPALIGSLEV GAPVIPVFIWSP EEEEGPGVTVAMGGACKYWLHQA  
LSCFSSSLERIGSHLVY LKANGASLRTLKELVKETGARTVL TNALYEPWLKERDDVVVSALQKDGV ECRVFHS  
YCLRDYPYSVSTEGVGLRGIGSVSHFMSCCRQNPGSASGVPLEPPVSLPTPAHW PQGVSLD TLDLARMPRRKDG  
TTIDWAANIRKSWDFSEEGACARLEAFLNDGVYRYEKESGRADAPNTSCLSPYLHFGQISPRWLLWDAKGARC  
RSPKFQQRKLAWRDLAYWQLM LFPDLPWESLRPPYKALRWSSNRHHLKAWQRGRTGYPLVDAAMRQLWLTGWMN  
NYMRHVVASFLIAYLYLPWQEGYRWFQDTLVDADVAIDAMMWQNGGMSGLDHWNFVMPVDAALTCDCPGSYV  
RKWCPELADLPDEL IHKPWKCPASMLRRAGVVLGQTYPERIVTDLEERRSRSLQDVAHVRKEFGQYVDKRTGC  
DLVPLPPRLSETLGLSHRDGGVVTEGKQFLLPVITRMEFKHQLED PDADAASNPNYAVLKG YVSRKRDETIA  
FLNERDFTASVMYEGVQRKERLES DYRRMEGLPRPPAPRGRARRTP TAKDRFSVVPGGAVASLR

>Plectropomus\_leop\_XP\_042354039.1

MLHSIWRSSSFSTVAPRLLRLFLAHVQQRPSVFSCLTKSYTSQTIMSGKKRKSESAAAKEPSAKQQKLAPMK  
KDEKEKAVGWLKDL LKQORTEGREMKFNKKRLRFISET EKI KQSGEVLYWMLRDHRVQDNWSLIHAQRLALK  
ENLPLHVCFC LVVPKSELSTLRHYNFMLKGL EEEVAK ECKTLDIQFHLLHGSAAEVLPGFVSDRSLGAVVTD FY  
PLREP VQWLEGVKKALPKDIP LIQVDAHNVPVCWVASPKLEYGARTIRGKITKL LPEFFTD FPPVEKHPHTAT  
RTAKPVWDKTLASLQVDQTVGVPEWAKPGTKGGMAMLESFIDVRLKLFDTKRNDPNAVALSQLSPWIRFGHL  
SAQRVALQVQHSGKSAGHSVASFIEELVVRRELTDNFCFYNKKYDSIEGAYEWAQKTLKDHAKDKRPYLYTRE  
QLEKAKTHDKLWNGAQYQMVTEGKMHGFLRMYWAKKILEWTS SPEEALSIALYLNDRYELDGDQDPNGFVGC MW  
SICGVHDQGWAERPXF GKIRYMNYKGCMRKFDVAGFERKYCPKNL

>Plectropomus\_leop\_XP\_042366222.1

MSASRTIICLLRNDLRLHDNELFHWQRNAEYIVPLYCFDPRHYVGTYNYNLPKTGPFRLRFLLESIRD LRNT  
LLSKGSNLVVRGKPEEVVADLIKQLG SVSTVAFHEEVTSEELDVEKRVKDVCAQMKVNVHTCWGSTLYHRDD  
IPFNHISRLPDVYTQFRKAVETQSRVRPLFPTPEQLKPLPQGLEDGA IPTAEDLQQTEPVADPRSAFPCSGGE

SQALARLKH YFWD TNVAAYKETR NGLIGVDYSTKFAPW LAMGCISPRYIYHQIQQYERERTANQSTYWVIFE  
LLWRDYFKFVAVKYGNRLFQIQGLQDKSIPWKKDMRLFNAWKEGRTGVPFVDANMRELALTGFMSNRGRQNV  
SFLTKDLGLDWRMGAEWFE SLLVDHVDSSNYGNWLYSAGVGNDPREN RKFNMIKQGLDYGNGDYVRQWVPEL  
QKIRGADVHTPWTLSASLSHAQVSLGETYPTPIVMAPEWSR HVNKKTS GTGPSR GKKGPSHTPKQHGNRGI  
DFYFSRSKNL

>Plutella\_xyl\_XP\_011557520.2\_cry-1

MSAAPAVVQAGEPPVVPQAPPSPAPRTAPPRHTIHWFRKGLRLHDNP AFREGLQDAVTFRCVFIIDPWFAS  
SSNVGINKWRFL LQCLEDLDASLKKINSRLFVVRGQPADALPKLFKEWGTTALTFEEDPEPYGRVRDHNITAK  
CREVGITVISRVSH TLYKLDKIIERNGGKAPLTYHQFQALIASMPPPPPAELAVGPAGLHGATTVPSEDHDER  
FGVPTLEELGFEVENLKPPVWVGGESEALARLERHLEKAWVASFGRPKMTPQSLLASQTGLSPYLRFGCLST  
RLFYQ LTELTKRVKVRPPLSLHGQILWREFFYCAATRNP NFDRMEGNPICVQIPWEKNQEALAKWANGQTG  
YPWIDAIMVQLREEGWIIHHLARHAVACFLTRGDLWISWEDGMKV FDELLLDADWSVNAGMWMWLS CSSSFFQQF  
FHCYCPVRFGRKTDPN GDFIRRYIPVLKNIPTRYIHEPWAAPDEVQQAARCVVGRDYPLPMVDHGKASSINIE  
RIKQVYAQLAKYK PQSNLNPQTVQRPNSMQMSPSPTSIIITSINQSNFLCSQTPEPATDNFSATDQTELN DKN  
QTIDINSTDKQDNYDLKNLTIMNNDLQQEFNNTNEMYLQTQQFINKIIRSDLYDQQQQPVKLNYNEEKGQFFL  
PAYNGNDELCLHPPNFETPSYTDLQPCNQNGTEESTSNKEGQGGGAATEKKDSYSSIDKTNPVDQ NITTK

>Plutella\_xyl\_XP\_037961567.1\_cry-1

MTTARNTVVHWRKDLRLHDNLALRNAINEAENRKHS LRPIYIMDPDIKQKVGSNRLRFL LQSLHDLDNNLKN  
INSRLYVVGKNPIEILPKLFDKWQVKYLTIQLDIEPEYVEQDEII EKISEEKDIFVVKRVQNTVYDVH SVLKK  
NNGNVPMTYQKFLSLVLDVQVKECIEITKKVSDDCKPPKDGQEKKSANCYDVPTAADIDFDESELGPCKYPPG  
ETEGVKRLHSYMRD WVCFEKPNSSPNSLEPSTTVLSPYISHGCLSAKLFYHKLKEAENGRKHSEPPVSL  
GQLMWREFYYVAGAGTKNFDKMVGNAVCTQIPWGKNDEHLKAWAEGRTGYPFVDAIMRQLKQEGWIIHHLARHM  
VACFLTRGDLWISWEEGAKVFEEYLLDYDWSLNAGNWMWLSASAFFYKYFRVYSPVAFGKKTDKTGLYIRKYV  
PELKKYPT EYIYEPWKAPKSVQTTAGCII GEHYPKRIVEHETIHKENMQKMNAAYKVNKEKKSLKRPRS

>Plutella\_xyl\_XP\_037964882.1\_cry-1

MLGGSVLWFRHGLRLHDNPALLSAIEDRGQTF FPLFI FDGETAGTKIVGYNRMRYLLES LDDLDSDQFKKHGGR  
LLMVKGQ PSTIIRRLWEEFGIRKLCFEQDCEPVWRERDDSVRRECSQTGIKCVQHVSHTLWEPDQVIRANGGI  
PPLTYQMFLHTVGTMGEP RPVEDADFTGITFGTLPDCFYQEFTVYDKTPKPEDLGVFLENEDIRMIRWVGGE  
SQALLQATQRLQVEYETFSRGSYLP THGSPDLLGPPISLSPALRFGCLSVRRFYWSLQEVFRVRVHRGRLPAAH  
FISGQLIWREYFYTMSVNNPQYQMEANPICLDIPWRQPRGDELERWKS GRTGFPFIDAAMRQLLTEGWLHHA  
VRNTVASFLTRGTLWLSWEHGLHHFLKYLLDADWSVCAGNWMWVSSSAFEALLDSGECADPVRLGQRLDPSGE  
YVRRYVPELSQMPRNYVYEPWKAPLEVQERANCVIGRDYPAPIVNH LAAAASNRAAMQELRLLLQKAPPHCCP  
SSDDEIRQFMWLHGETNQ PDEVHSGI

>Plutella\_xyl\_XP\_037969083.1\_LOW\_QUALIT

MSVLNNLILLAKRIQFVRMASSAKKIKLSAPSASSGSETGTNVEEFMKKIQAKREDTAKSILEYKFNNKKRVRI  
ISEEQLVPEGCEGIVYWMSRDSRVQDNWAF LFAQKLALKNEVPLHVCFLIAKYLDASVRQFHFL LKGLEKVA  
ADCKKLNISFHLLEGSGADALXQWVVDHKIGAVVCDFNPLRVPLGWLDGVKKKIKKDVPLIQVDAHNIVPCWV  
ASDKQEYSARTIRXKINSKLDEF LTFEFPVIKTS LPSKFEPEPIDWXAIESREADKT VGPVEWAKPGYDEAX  
KQLKSFLDKRLKIFATKRNDPTQDALSNLSPWFHFGQISSQRTALCVKEYKSKHTESXNAFLEESIVRC ELAD  
NFCFYNEHYDSIKGASNWAQKTLDDHRKDKRTHIYTL DQLKNAQTHDELWNSAQIQLVKEGKQHGF LRMYWAK  
KILEWTPSPEDALKYSIYLN DYSISIDGRDSNGYVGMLACGPVCGIHDQGWASAQCSGKIRFMNYQGWKRKF DV  
NAFVARYXGKVHKYVPPKDAK

>Pocillopora\_dam\_XP\_027043718.1\_cry-1-like

MAAKQQRVHHTIHWFRKGLRLHDNL SLKEACETSLTRPVYFIDPEYVKRGNMGFNRRWRFLIQSLNDLDNNL K  
SLGSRLFVIQ GKPELELPKLFKAWKITKLTFEFDHEPEGRQDAKVHELATKAGIEVETKVCHSLYDLDKIIA  
KNGGTAPLTYKKLCSVVASLGSPLKPIPTVDKSTFDGCSTPVGKGNEYQLPTLEELEIETPEESSTVLFPGGE  
SEALRRLDEHMQKEDWVNKFEKPNTSPNSLQ PSTTVLSPYVVFGLSARLFYHRLSDVYSRAKKHSNPPVSLH  
GQLLWREFFYTAAYATPNFNKMEGNPVCLQIPWNNNQEFIQAWSEARTGYPFIDAIMTQLRREGWIIHHLARHA  
VACFLTRGDLWISWEEGLKVFEKLLLDH DWSLNAGNWMWLSASAFFHAYFRVYSPIAFGKKTDPNGDYIKKYI  
PILKKYPPKYIYEPWTAPVSIQKTAGCVIGKDYPRPIVDHKEVVKINIAQMKKARTERDGTGMEEESSEEKK  
SSPGKKRKTNKEAPP SKRSRKITEFLKT

>Pocillopora\_dam\_XP\_027044972.1\_cry\_DASH-1

MNRLLVQRGYFYTF TDIQVSFFSAGTNFLHSLRRYQHREVTPTMEATRGSVVIYLMRNDLRVHDNECLQWAH  
QNSDFVIPLFCFDK SILSPTAVTWHYKFAKTAMHRAKFILESVSDLRESLRELGS DLVVRTEQTAKEAVSDII  
SLCQEKNEGHVALVYQREITKEETDVEAELMKVCEAKKVIKVSF WGLTLYHLEDLPFASVKFLPD TYTEFRKT  
VEAKCRVRPLIPAPDCLKSLPAFLKDDHVGRMPALKE LAKDYSEETADSRSAFFPSGGETAALKRLNQYLWDT  
DLVARYKETR NGLIGSDYSTKFSPLAVGALSPGKVFDCIKRYETECTANQSTYWVIFELLWRDYFKFVSLKY  
GNSIFYLSGIMRKTGLPWKRDMMAFEQWQYQGTGVPFVDANMRELLYTGWMSNRGRQNVASFLVKDLGLDWRM  
GAEWFE SLLLDHVDSSNYGNWNYSAGVGNDPREN RKFNMIKQALDYDADGDFVRLWVPELAGLKGAKVHTPWL  
LSSSELKHAGVTLGENYPKPMVCPPEWSRHTSKVKDSRKT PRAQHRGIDFYFKSPEGAGSSKKRY

>Pocillopora\_dam\_XP\_027056122.1\_cry-1-like

MSYATVQRKDVHAGSVDERSSAINDKEKHAIHWIRKDLRLHDNPSLLEAVKGSDDLRIIYVLDTKVDQNIIGIG  
ANLWRFLLQSLEDVDDSLRQLNSRLFVVRGQPADVFPRLFREWNTSLTTFEEDSEPFGREKDAAIRLLAQESG  
VQVAIRRSHTLYDPQLIIKNNGGTPPLTYKKFLAIISLGGPPGHVPVPTLDVHLLGSCSTPISDDHEEKYGVPS  
LEELGLDIRKIIHAADVHGGEKEALVRLNRHLERKAWIASFEKPKVTPNSLFPSPGTGVSPYLRFGCLSPRLFYH  
RLTELYRKVKSSDPPIISLYGQLLWREFFFTVAANNPHFDRMTTNPMCLQIPWKKNPENLAKWEEGRTGFPWID  
AIMIQLQQEGWIIHLLARHAVGCFLTRGNLWISWEEGMKVFERWLLDAEWSLNAGNWMWLSCSAFFQQFFNCIC  
PVGFGRKLDPNGDFVRKYLPLVRGFPKAYIHAPWTAPESVQKAARCIIGVDYPYPMVDHSHKVSANLEKLRNI  
FKALLCYKDSTAVSSEKQDNLHGQQEKLKQQMFLLLEDKENE

>Pocillopora\_dam\_XP\_027060408.1\_uncharacte

MTSNINSLHWFRKGLRLHDNPSLRQAIEGSSSTFRAVFFLDVDSLDEINLSKNKWRFLECLHDLDKSLRRLNS  
RLFIIVRGQPIDVFPKLIQWNIITRVTYEYDSEFPFRRRDDSIKRLLSEGEVVLTSVSHTLYDIDEVIKSNHG  
NVPVTFKQFECLVSKLKSPPNCVPPVDEQLLKNCCTPVEDNDENNYGVPEYDALDFVEEEAEPGQFAGGETEA  
LRRLAVLEKEVAEPKLGKPPQESNSPFPKSSKLSPLYRFGCLSVRQLFHRMNQVYREANGKPAPMSVHLPLLW  
REFYFVVASKHPNFDKMKNNSLCLQFPWEEQACKLEKFQQGKTGFPWIDAMMRQMLLEGWIPYLARQAVGCF  
TRGALWICWEEGFKIFEKYMLDAEWSINAGSWMWLSCSAFFAKHPQWTCPVGLGKHLDPQGNVVRKYIPELKD  
FPAEYIYEPWDAPLELQVACNCVIGTDYPQPIVNHQQARKSCVDRLRGVYQNLVTKVSCNVGLGHNAMHWFRK  
DLRLHDNPSLCEALANCRTFHAVYILDPVSARAAKVSANRWKFLVDCLRDLDKSLRECGSRLHVIRGQPTYVL  
PKLFDQWNISKLTFECEIEPFGQRRDVAVAVLGEHGVVVISKPSHTLYDPERI IKSNEGEAPMLIKTFENVI  
RQMGPPPEKPVDAVNKEMFKGCVCPVSNHDSTKFGIPSLDELGYSGCEVTTGDLWVGGEQEAMKRLTELEEKVL  
EGNLKKSVEGLDALRPSRTQLSPYLRFGCLSPRLFHLRLTKAYMKVKCQPPPLSLYRQLVWREFFFTLASRNP  
QMDRAVDNPLSFNIPWEENQDAFDAWKKGQTGFPWIDAIMRQLHAEGWIIHVARQAVGCFLTRGCLWISWEEG  
FKLFEQLQLDSEWSLNAGNWLWVSCSAFFHGQIPWYCPVNVGKKLDPSGNFIRRYVPELKTMPTKYIHEPWMA  
PLAVQKASNCIIIGQDYPDLRLCDHIERRKVCLERLKDVCVHQIQGTNSSSRDIADVVD

>Podargus\_stri\_\_NXX18684.1

TQRAFLYAQRALALKQELPLHVCFCCLVPKFLDATIRHYAFMLRGLQEVAEECAELNIPFHLLLGyakDVLPAFV  
VEHGVGGLVTDfCPLRLPRQWVEDIRDLRPEDVPFAQVDAHNIVPCWVTSPKQEYSARTIRGKIHAQLPEFLT  
EFFPIICHPPSPCAEPIAWEACYSSLQVDRTVREVIEWATPGTAAGLAVLQSFIRERLKSFGSHRNDPNKAA  
LSNLSPWFHFQGVSTQRAILEVQKHRDKYKESVDAFVEEAVVRRELAENFCYNNENYDSVQAYDWAQTTLKL  
HAKDKRPFLYNLQELEQGTTHDPLWNAQLQMVREGKMHGFLRMYWAKKILEWTHSPEEALQFAIYLNDRYEL  
DGRDPNGYVGKLQEGGMGADAPPCLTGCLWSICGIHDQGSARAIFGKIRYMNAGCKRKFVDVGQFERRYAP  
H

>Podargus\_stri\_\_NXX19603.1

FVLKVDYDVCSSNYGNWLYSAGIGNDPRDNRKFNMIKQGLDYDGNGDYVRLWLPELQGIKGADIHTPWALSSAA  
LSQAGVTLGETYPQPVVTAPEWSRHINQRPQGRSPHPRGRRGPAHTPVQHKGRGIDFYFSRKTDI

>Podargus\_stri\_\_NXX21976.1

RFLQLSLEDLDNSLRKLNSRLFVVRGQPTDVFPRLFKEWGVTRLTfEYDSEFPFGKERDAAIVKLAKEAGVEVV  
IENSHTLYDLDRIIELNGHKPPLTYKRFQAIISRMELPKKPSTVTSQQMETCKVDIQENHDDVYGVPSLEEL  
GFPTDGLGPAVWQGETEALARLDKHLERKAWVANYERPRMNANSLASPTGLSPYLRFGCLSCRLFYYRLWE  
LYKKVKRNSTPPLSLYGQLLWREFFFYTAATNNPKFDRMEGNPICIQIPWDRNPEALAKWAEGKTGFPWIDAIM  
TQLRQEGWIIHLLARHAVACFLTRGDLWISWESGVRVFDELLEDADFSVNAGSWMWLSCSAFFQQFFHCYCPVG  
FGRRTDPSGDYVKRYLPKLKGFPPRYIYEPWNAPESVQKAAKCIIGVDYPKPMVNHAETSRLNIERMKQIYQQ  
LSRYRGLCLLASVPSCVEDLSGPVADSASGQGCSSSTAMRLSQADQASPKRKLEGAEELCTEELYKRAKVTGL  
PAPEVPGKSS

>Podargus\_stri\_\_NXX23758.1

MPHRTIHLFRKGLRLHDHPTLLAALGSSEALYPVYILDREFTTSAMHIGALRWHFLLQSLEDLQKNLCQLGSC  
LLVIQGEYESVLRDHIQKWNITQVTLDAAEMEPFYREMEANIRRLGEELGFEVLSLVGHSlyDtkRILDlNGGT  
PPLTYKRFLHILSLLDGDEVPVRNVTAEDFQRCRAPDLGLAERYRVPLPVDLKIPLLESLSPPWRGGETEGLQRL  
QQHLTDQGWVASFTKPRTIIPNSLLPSTTGLSPYFSMGCLSVRTFFYRLSNIYAQAKHSLPPVSLQGQLLWRE  
FFYTVASATPNFTRMAGNPICLQISWHEDAERLHKWKTATGTFPWIIDAIMTQLRQEGWIIHLLARHAVACFLTR  
GDLWISWEEGMKVFEELLLDADYSINAGNWMWLSSAFAFFHQYRRIFCPVRFGKRTDPQGGYIRKYLPIKPNFP  
SKYIYEPWRASEEEQKQAGCIIIGQDYPFPMVNHKEASDHNQLMLKQVREEQQRQAQLTR

>Podiceps\_cris\_\_KFZ48403.1

RFLQLCLEDLDANLRKLNSRLFVIRGQPADVFPRLFKEWNIAKLSIEYDSEFPFGKERDAAIKKLASEAGVEVI  
VRISHTLYDLDKIIELNGQPPLTYKRFQTLISRMELPEMPVETITPEVMEKCTTPVSDDHDEKYGVPSLEEL  
GFDTDGLPSAVWPGGETEALTRLERHLERKAWVANFERPRMNANSLASPTGLSPYLRFGCLSCRLFYFKLTD  
LYKKVKKNSSPPLSLYGQLLWREFFFYTAATNNPRFDKMEGNPICVQIPWDKNPEALAKWAEGRTGFPWIDAIM  
TQLRQEGWIIHLLARHAVACFLTRGDLWISWEEGMKVFEELLLDADWSVNAGSWMWLSCSSFFQQFFHCYCPVG  
FGRRTDPNGDYIRRYLPVLRGFPKAYIYDPWNAPESIQAACCIIGVNYPKPMVNHAEEASRLNIERMKQIYQQ

LSRYRGLGLLATVPSNPNGNGGGLMGYSPGESISGCSSTGGAQLGTGDGHTVVQPCALGDSHSGASGIQQQG  
YCQASSILHYAHGDNQQSHLLQAGRTALGTGISAGKRPNPEEETQSVGPKVQRQSAN  
>Podiceps\_cris\_\_KFZ51847.1  
RFLQSQLEDLDNLSRLKLNLSRLFVVRGQPTDVFPRLFKEWGVTRLTTFEYDSEFPFGKERDAAIVKLAKEAGVEVV  
IENSHTLYDLDRILIELNGHKPPLTYKRFQAIISRMELPKKPVSTVISQQMETCKVDIQENHDDVYGVPSLEEL  
GFPTDGLAPAVWQGGETEALARLDKHLERKAWVANYERPRMNANSLLASPTGLSPYLRFGCLSCRLFYRRLWE  
LYKKVKRNSTPPLSLYGQLLWREYTPATNNPKFDRMEGNPICIQIPWDRNPEALAKWAEGKTGFPPWIDAIMTQ  
LRQEGWIHHLARHAVACFLTRGDLWISWESGVRVFDELLLDADFSVNAGSMMWLSCSAFFQQFFHCYCPVGFG  
RRTDPSGDYVKRYLPKLKGFPSRYIYEPWNAPESVQKAAKCIIGVDYPKPMVNHAETSRLNIERMKQIYQQLS  
RYRGLCLLASVPSCVEDLSGPVTDAAASGQGCSTSTAIRLSQADQASPKRKHEGAEEELCPEELYKRAKVTGLPA  
PEIPGKS  
>Podiceps\_cris\_\_KFZ58887.1  
IGALRWHFLLQCLEDLQKNLRQLGSCLLVLQGEYEPVLRDHIQKWNITQVTLDAETEPFYKEMEANVRRLGDE  
LGFEVLSLVGHSLYDTRKILDLNGGTPPLTYKRFHLHLSLLGDPEVPVRNLTAEDFQRCRSPDPALAERYRVP  
LPVDLKIIPPELSPPWRGGETAGLQRLQHLTDQGWVASFTKPRTIIPNSLLPSTTGLSPYFSMGCLSVRTFFYR  
LSNIYAQAKNHSLLPPVSLQGQLLWREFFYTASATPNFTKMVGNPICLQISWYEDAERLHKWKMAQTGFPPWID  
AIMTQLRQEGWIHHLARHAVACFLTRGDLWISWEEGMKVFEELLLDADYSINAGNMMWLSASAFFHQYTRIFC  
PVRFGKRTDPEGQYIRKYLPLVKNFPSKYIYEPWTASEEEQKQAGCIIIGQDYPPFMVNHKEASDHNLQLMKQV  
REE  
>Podiceps\_cris\_\_KFZ69140.1  
DNWAFLYAQRALKQELPLHVCFCLVPKGWWWDGVCRGADHPVVLSPSPQECALNIPFHLLLGYAKDVLVPV  
VVEHGVGGLVTDFCPLRLPRQWVEDVRERLPEDVPFAQVDAHNIVPCWVASPKQEYSARTIRGKIHAQLPEFL  
TEFPPVIRHPYPPSCPAEPIAWEACYSSQLQVDRVKEVEWATPGTAAGLAVLQSFITERLKSFGSHRNDPNKA  
ALSNSLPWFHFGQVSTQRAILEVQKHRDKYKDSVDSFVEEAVVRRELAENFCYNNENYDSVQGAYDWAQTTLK  
LHAKDKRPFYELQDLEQGATHDPLWNAQLQMVREGKMHGFLRMYWAKKILEWTRSPPEALRFAIYLNDRYE  
LDGRDPNGYVGKRLWSICGIHDQGWAERAVFGKIRYMNAYAGCKRKFDVGQFERRYAP  
>Podilymbus\_podi\_\_NXL47854.1  
FTQGQPTSSYCFSLSHKVDYDVCSNYGNWLYSAGIGNDPRENKRFNMIKQGLDYGNGDYVRLWVPELQGIKG  
ADVHTPWALNSAALSQAGVTLGETYPQPVVTAPEWSRHISQRPQGRSPHPRGRRGPAHTPMQHKDRGIDFYFS  
HKKDA  
>Podilymbus\_podi\_\_NXL49016.1  
MGVNAVHWFRLRLHDNPALRECIQGADTVRCVYILDPWFAGSSNVGINRWRFLQCLEDLNLRKLNLSRL  
FVIRGQPADVFPRLFKEWNIAKLSIEYDSEFPFGKERDAAIKKLASEAGVEVIVRISHTLYDLDKIELNGGQP  
PLTYKRFQTLISRMEPLEMPVETITPEVMEKCTTPVSDDHDEKYGVPSLEELGFDTDGLPSAVWPGGETEALT  
RLERHLERKAWVANFERPRMNANSLLASPTGLSPYLRFGCLSCRLFYFKLTDLYKKVKKNSSPPLSLYGQLLW  
REFFYTAATNNPRFDKMEGNPICVQIPWDKNPEALAKWAEGRTGFPPWIDAIMTQLRQEGWIHHLARHAVACFL  
TRGDLWISWEEGMKVFEELLLDADWSVNAGSMMWLSCSSFFQQFFHCYCPVGFGRRTPNGDYIRRYLPVLRG  
FPAKYIYDPWNAPESIQKAAKCIIGVNYPKPMVNHAESRLNIERMKQIYQQLSRYRGLGLLATVPSNPNGNG  
NGGLMGYSPGESISGCSSTGVFFFFPASPAQLGTGDGHTVVQPCALGDSHSGASGIQQQGYCQASSILHYAH  
GDNQQSHLLQAGRTALGTCISAGKRPNPEEETQSVGPKVQRQSTN  
>Podilymbus\_podi\_\_NXL52186.1  
RFLQSQLEDLDNLSRLKLNLSRLFVVRGQPTDVFPRLFKEWGVTRLTTFEYDSEFPFGKERDAAIVKLAKEAGVEVV  
IENSHTLYDLDRILIELNGHKPPLTYKRFQAIISRMELPKKPVSTVISQQMETCKVDIQENHDDVYGVPSLEEL  
GFPTDGLAPAVWQGGETEALARLDKHLERKAWVANYERPRMNANSLLASPTGLSPYLRFGCLSCRLFYRRLWE  
LYKKVKRNSTPPLSLYGQLLWREFFYTAATNNPKFDRMEGNPICIQIPWDRNPEALAKWAEGKTGFPPWIDAIM  
TQLRQEGWIHHLARHAVACFLTRGDLWISWESGVRVFDELLLDADFSVNAGSMMWLSCSAFFQQFFHCYCPVG  
FGRRTDPSGDYVKRYLPKLKGFPSRYIYEPWNAPESVQKAAKCIIGVDYPKPMVNHAETSRLNIERMKQIYQQ  
LSRYRGLCLLASVPSCVEDLSGPVTDASAGQGCSTSTAMRLSQADQASPKRKHEGAEEELCPEELYKRAKVTGL  
PAPEIPGKSL  
>Podilymbus\_podi\_\_NXL53871.1  
MSHRTIHLFRKGLRLHDNPALLAALESSEVIYPVYILDRKFMAVSMHIGALRWHFLLQSQLEDLDNLRKLNLSRL  
LLVLQGEYESVLRDHTQKWNITRVTLDAETEPFYKEMEANVRRLGDELGFEVLSLVGHSLYDTRKILDLNGGT  
PPLTYKRFHLHLSLLGDPEVPVRNLTAEDFQRCRSPDPALAERYRVLPLVDLKIIPPELSPPWRGGETAGLQRL  
EQHLTDQGWVASFTKPRTIIPNSLLPSTTGLSPYFSMGCLSVRTFFYRLSNIYAQAKNHSLLPPVSLQGQLLWRE  
FFYTASATPNFTKMVGNPICLQISWYEDAERLHKWKTAQTGFPPWIDAIMTQLRQEGWIHHLARHAVACFLTR  
GDLWISWEEGMKVFEELLLDADYSINAGNMMWLSASAFFHQYTRIFCPVRFGKRTDPEGQYIRKYLPLVKNFP  
SKYIYEPWTASEEEQKQAGCIIIGQDYPPFMVNHKEASDHNLQLMKQVREEQYGTALTR  
>Podilymbus\_podi\_\_NXL54180.1  
MPHSSIHWFRLRLHDNPALLAAAAADCRCLHPLFILDPSDRAGANGRRFLLDALRDLDGSLRDVGSRLFV  
VRGCPPEEVFPRLFRAGTTTLTTFEVDTEPLARRDDAVAELAAQHGVVIREVSHSTLYDTERVLALNDGKAPL

TYKHLQSSLLASLGPPEKPAPALTREHLQDGCARPARRGHREDGQCPAPITLILGLLGLSPQPKTRPQCVPHMQ  
AWVCGFKKPEPETENSLSPSTTVLSPYLKFGCLSVRTFWWRLDEVYQGREHSRPPVSLHGOQLLWREFFYTAGAG  
IPNFDPMVGNPVCLQVDWDDNPQHRLRAWREGQTYGPFIDAIMTQLRTEGWIHHLARHAVACFLTRGDLWVSWE  
EGLKVFEELLLDADWSLNAGNWLWLSGSAFFHRYFRVYSPIAFGKKTDRDGAYIRKYLPIKDFPTAYIYEPW  
KAPRAVQERAGCLVGTHYPRPIVEHGAASKRNLGRMKAAR

>Pollicipes\_poll\_\_XP\_037072142.1

MAPPVVIHWFRKGLRLHDNPALLAAAAYAERTGAHLRPIFILDPHFVRSGRVGANRWRFLAGALADLAASLAA  
RGSRLFVCRGAPEAVLARLIPDWDVRHLTFEADTEPYAVARDARVTALARQLSCAVTAVTSHTLFEPARVCAA  
NGGRAPLTYQKMVSLAGQLGAPPAEAPAPASLPAPGKCPGEHAPPTLHELGVDAERVPAELYPGGETEGLARL  
ERHLARAAWCCRFQKPQTAPNSLAPSTTVLSPYLKFGCVSARLFYHRLAAVYRAGGTHTQPPVSLHGOQLLWRE  
FFYTVGASTPNFDRMEGNPICRQIPWQKNEEHLKAWTEGRTGYPFIDAIMTQLRQEGWIHHLARHAVACFLTR  
GDLFISWEEGMKVFDELLDSDWSLNAANWMLWSASAFFHQFFRVYSPVAFGKKTDPNGDYIKKYLPLKPKYP  
SQYIYEPWKAPLSVQRAAGCVIGTDYPAPIVDHDVTVRPRNIEWMAAAYKKGKPAGPPAAAAPVQKASAGSPSE  
QPAARKR PASGGNKPAQKRSGGGQNKAKARPAGQ

>Pollicipes\_poll\_\_XP\_037072188.1

MGQDDPMMAKPVGVHWRHGLRLHDNPALTDLLATCSTVYLMFIFDGESGGTRLIGYNRFKFLLESLEDLDGQ  
LATHGGRLVTARGDPVDVLNMFVRDYGMTLSFEQDCEPVWLPRDDRVRWCQQQGVTIIERISHTLWDPAEV  
IDANGGEPPLTFAMFHQVAMSIGLPPPPVQAAPLDSRQLARVDTDRPHGHPVELFPRVPAVADLKPLSPPAGE  
HQKRYVGGETHALYLLGERIAYEEAALSIRGIIMPNOYCPDLLGPPRSLSAYLRHGCLSVRRMYHMLQKVFRAI  
MDVNGHSLSLICQLIWREFFYTMSVNNPYDQMEPNPICLNIRWRSARQLKQWTLGQTGYPFIDAAMRQLVQ  
EGWIHHVARNAASCFLTRGDLWISWVDGLQVFYEHLDDADWSVSAGNWMWVSSSAFEKFLDTSDIISPVAYGR  
MFEPTGEYIRRYVPELRRMPTEYVFSPWEAPLEVQREAGCVVGEDYPCRIVDHQVASRHNCKMKRIAQQQLDS  
CPPHCMPSGHAEVKLFLGVPGASLEDVLAGR

>Pollicipes\_poll\_\_XP\_037075374.1

MSNDETPKHTIHWFRKGLRLHDNASLLEGVTGSSTFRCIYILDPWSAGSSSVGINKWRFLLECLEDLDKSLQR  
LNSRLFVIRGQPADVLPSLFKKWGTCLSFGEDEPFGRVRDRNVRKMAEEHQVRVVSRTCHTLYDLNRVMAK  
MGGKSPLTYKQFQNVLLSMPPPPPPAAITLMLDDSYTPVSDHDDKYGVPTLDELGFDTDSAQPAVWHGGE  
TEALVRLERHMERKAWIASFGRPKMTPQSLKASLTGVSPYLRFGLSPRLFYRDLAHLRYKIKNSDPPLSVHG  
QLLWREFFYVAATNNPNFDMVGNPICVQIPWDRKPKALSKWATGQTGF PWIDAIMTQLRREGWIHHLARHAV  
ACFLTRGDLWISWEEGMQVFEELLLDADWSVNAGTWMWLSCSSFSQQFFHCYSPVRFGRKVDPDGDYIRNYIP  
VLNSMPSRYIHEPWLAPESVQKAARCVIGENYPLPIVSHAEASRINVERMRQVYTHLLGYKGGRVQLTGPLLP  
IPLGEEGEEQAQKLAPAVRATGASYKQDLLPSARQTARRVRAAPREA

>Pollicipes\_poll\_\_XP\_037083138.1

MSGKRIAIALLRNDLRYLDNEVLHMAHSSSDFFVPLYCLDPRHFQTTYHFGFPKTGAHRARFLLHSLEDLRAQ  
LTKHGSDDLVIREGRPESAVPDLSSLGHRSLSLVLOQEAATDEELRVERALADACRRLSVPVHTVWGATLYHRD  
DLPFKVQSVDPDVTQFRQAVESRASVRAPLTMPDRLRPLPAGVAPGGLPAPAALGLPDGPPAPDARSAFPWR  
GGEAAALDRLRHYLWQTDVATYKETRNLVGDYSTKFSPLWALGCLSPRHHSEVRRYEARTANKSTYVW  
LFELIWRDYFRFVALKFGNRIFFETGLLNKKVPWQNNKVAFDQWKDGATGVFPVDANMRELKLTGWMSNRGRQ  
NVASFLTDLGLDWRLGAEWFESELLDHDVCSNYGNWNYASAGIGNDPRENKFNMIKQATDYDPQGEYVRLWV  
PELASVKDGRVHMPWALPPAARRQLEYDPDMVVAPEWQRHASKTAPGRGRGRGGPQPRGRGQRRGIDFYFSSSA  
SGDRRH

>Pollicipes\_poll\_\_XP\_037090097.1

MIAPAEATMSEPPNKKQKKSDDCPIDKQIEDKRKQLREKGWKFNNKKRCRILTAEEVPEKARSVVYWMSRDQRV  
QDNWALLFAQKLALKFKLPLHVCFLVPKFLDATIRHYGFMKGLREVETEC SRLGIGFHLLIGPASTSLVKF  
VADNGAGAVVADFAPLRVPRRWLDDVIEALPNDVSVSQVDAHNVVPCWVASDKQEYGARTIRRKIMDRLPEFL  
TEFPPVLRHPHAADGKRQPVDWAAAERSLEVDRTVAEVEWARPGAAAALRQLDEFXRSRLRLFADKRNDPTVE  
ALSNSLPWLHFGQLSAQRAVLEVRRHSSSRHSKAVQAFVEEAVVRRELADNFCYYQPHYDSVEGAYGWAGDTLK  
AHRKDKREYLYSREQLAAQTHDDLWNAAQIQMVQEGKMHGFLRMYWAKKVLEWTPSPPEALATAIYLNDRFS  
LDGRDPNGYVGCMWSICGIHDQGWAERPVGKIRYMNYQGCKRKFKVDQFVSRYGGKVHKYVAPK

>Polyodon\_spat\_\_MBN3281058.1

MKHSSIHWFRKGLRLHDNPALLAALRDCAEIRPVFILDWPFPNTRVGINRWRFLLDALKDLGSLRKVNSRL  
FVVRGKPTETFPRLFRQWKVTRLT FEMDTEPYSRQDAEVVKLAEEHGV EVIQKVSNTLYDTERVIVENNGKP  
PLTYKRLQITILSFLGLPKKVPVPTLDDMKGEWDYCLLLMVLIDCNVRTPCSDSHEQFVGPTLEELGQNPLK  
AGPHLYPGGEALRRLDQHMQRVAWVCNFKKPEPTNTLTPSTTVLSPYVKFGCLSAFTFWWRLTDVYRGAW  
VCNFKKPEPTNTLTPSTTVLSPYVKFGCLSAFTFWWRLTDVYRGKKHSEPPVSLHGOQLLWREFFYTAGAGIP  
NFHCMEGNPVCVQVDWDTNEEHLAAWREGRTGYPFIDAIMTQLRSEGWIHHLARHAVACFLTRGDLWISWEEG  
MKVFEDLLDSDWSLNAGNWQWLSASAFFHQFFRVYSPVAFGKKTDDKGDYIRHVQNVWEWNEHFVFNLAGL  
VCRQNERKYIPLLRKFPAYIYEPWKAPLSIQERAGCIVGQDYPRPIVEHDVVSKRNVQRMKAAYARRAAPNS  
ETGAVKRGEPESEFLAVNCFKITP

>Polyodon\_spat\_\_XP\_041110950.1

MVVNTVHWRKGLRLHDNP SLRESIQGADSI RCVYILD PWFAGSSNVGINRWRFL LQCLEDLDASLRK LNSRL  
FVIRGQPADVF PRLFK EWNINRLSFEYDSEPF GKERDAAIKKLASEAGVEVMVQRSHTLYDL DRI IELNGGQP  
PLTYKRFQTLISRMETLETPVESITVEVMGKCMTPVSDDHDDKFGVPSLEELGFDTEGLPSAVWPGGETEALT  
RLERHLERKAWVANFERPRMNANSL LASPTGLSPYLRFGCLSCHLFYFKLTDLYKKVKKNSSPPLSLYGQLLW  
REFFYTAATSNPRFDKMEGNPICVQIPWDKNPEALAKWAEGR TGFPWIDAIMTQLRQEGWIHHLARHAVACFL  
TRGDLWLSWEEGMKVFEELLLDADWSVNAGSMMWLS SCSSFFQQFFHCYCPVGFGRRTPNGDYIRRYLPVLRG  
FPAKYIYDPWNAPE SVQKIAKCVIGVHYPKPMVNHA EASRLNIERMKQIYQQLSCYRGLGLLASVPSNP TGNG  
NGGMMGFSPGEGMHGGNTQASNPVGVEKGNAGMQQGFQMSSSGSSMLAYPQGD SLSGNGLMLQGRRAHSSVL  
TTVKRHSPEETAQGIGPKVQRQSSN

>Polyodon\_spat\_\_XP\_041119980.1

MEEKPGKLRKTKNDNGNTGAGRVLDTVKIDQKVVEGGRQAGSSSGREAKAARKQEPGKRESAGETTRSGSSGD  
ELSNTGTRKKRRLGARDVVASPPGGVGLASSIKETRLQARMSVQGFEFNKKRVRLISEAVEMKDGS ESIVYW  
MSRDQRVQDNWALLYSQH LALSHELPLHVCFC LVPRFLDATIRHFGFMLRGL EEVAKVDAHNIVPCWVASEKQ  
EYGARTIRKKIHDKLSEYLT EFPVLRHPHGAGCEAKAVDWEQARSSLEVDCSVKEVDWARPGTEAGLAMLES  
FIMERLKLFGSDRNNPNR PALSNLSPWFHFGQVSVQRAVLEVRKCSSKYLQSVNSFIEEAVVRRELADNFCYY  
NKNYDCVEGASDWAR KTLQDHAQDERSHLYSRAQLEAGKTHDPLWNA AQLQMTLEGKMHGFLRMYWAKKILEW  
TSSPEEALETALY LNDRYELDGRDPNGYVGCMMWSICGIHDQGWGERPVFGKIRFMNYAGCKRKFDV GQFERKY  
HPEKFTV

>Polypterus\_senegalus\_XP\_039605072.1\_cryptochro

MVVNSIHWFRKGLRLHDNPALLAALNGADTVRCVYILD PWFAGSTNVGVNRWRFLLESLEDLDTSLRKLGSRL  
FVIRGQPADVF PRLFK EWNNTTRLTFEYDSEPF GKERDAAI IKFAEELGVETVVKNSHTLYNL DRI IELNNNSP  
PLTYKRFQGIISRL EPPKKPVASLTKEQM QKCPTDIPETPYECFRVPSLDELGFKTATLSPSIWKGETEALL  
RLEKHLERKAWVASFERPRIN VNSLIASPTGLSPYLRFGCLSCRTFYITLLELYKKVKGNRSPPLSLFGQLLW  
REFFYTAATNNPKFDRMEGNPICVQIPWDKNPKALAKWAEQTGYPWIDA IMIQLKQEGWIHHLARHAVACFL  
TRGDLWISWECGMKIFDELLLDADFSVNAGSMMWLS SCSAFFQQFFHCYCPVGFGRRTPDPTGNFIRHYIPKLKD  
FPNRYIYEPWNA PDTVQKAAHCII GIDYPKPMISHAEASRLNIERMKQIYQHLSHYKGLSLLASVPTVSEEID  
LEYCNKHSSMPGKVSPLGKRDRPPDLEIDEKCTDPKVSCSHLMEGNFEQ

>Polypterus\_senegalus\_XP\_039617556.1\_cryptochro

MVVNTVHWRKGLRLHDNP SLWESLKGADSVRCVYILD PWFAGSSNVGISRWRFL LQCLEDLDANLRKLNSRL  
FVIRGQPADVF PRLFK EWNISRLSFEYDSEPF GKERDAAIKKLASEAGVEVIVRISHTLYDL DKI IELNGGQP  
PLTYKRFQTLISRMEPLETPVESITADVMGKCTTPVSDHDEKFGVPSLEELGFDTEGLPSAVWPGGETEALT  
RLERHLERKAWVANFERPRMNANSL LASPTGLSPYLRFGCLSCRLFYFKLTDLYKKVKKNSSPPLSLYGQLLW  
REFFYTAATNNPRFDKMEGNPICVQIPWDKNPEALAKWAEGR TGFPWIDAIMTQLRQEGWIHHLARHAVACFL  
TRGDLWISWEEGMKVFEELLLDADWSVNAGSMMWLS SCSSFFQQFFHCYCPVGFGRRTPNGDYIRRYLPVLRG  
FPAKYIYDPWNAPE SIQKAAKCVIGLHYPKPMVNHA EASRLNIERMKQIYQQLSCYRGLGLLASVPSNPNGNS  
NGGVTGLSPNEIIQ GTHSSVGTGMGTGENQVVGGLTFQHGD SHPVLHHEGYGSGNSILLYSQRGSQQTESVIL  
QPVGRGTAASLT TVKRPNPEETAQGIGPKVQRQSSN

>Polypterus\_sene\_XP\_039620008.1

MKHNSIHWFRKGLRLHDNPALLAALKDCAEIRPIFI LDPWF PKNMKVGINRWRFLIESLKDLD CSLRKMNSRL  
FLVRGKPV E VFPRLFK EWRVTRLTFEIDTEPYAQLRDSQVVEIAKEHGVEVIQKVSNTLYDTERI ILENNGKP  
PLTYVKLQGLLSRLGPPKKPAPSLKGEDLKG IHTPYTDYHDETFGIPTLEELGLDPAAAGPHLYPGGETEAI R  
RLDEYMQKSVWVCNFKK PETEPNSLTPSTTVLSPYVKFGCLSVRTFWWKIAEVYHGK KHSPPVSLHGQLLWR  
EFFYTAGVGIPNFDHMEGNSVCLQVDWDSNEEYLA AWREGRTGYPFIDAIMTQLRTEGWIHHLARHAVACFLT  
RGDLWISWEEGQKVFE EFLLDADWSLNAGNWQWLSASAFFYQFYRIYSPVAFGKKT DKNGDYIRKYIPI LRKF  
PADYIYEPWKAPKS IQERAGCIIGKDYPKPIVDHDTVSKKNIQMKKAAYSRRSATSSKSGENCLKGPKKRALS  
MANLFTKKTSQKTS

>Polypterus\_sen\_XP\_039609456.1

MCAARAVICLLRNDLRFNDNEVLYWAQANA EYVPLYCFDPRHYLGHTTFNF PKTGPFRLKFLLESVKDLRET  
MKKKGSNLVVRKGKPEEVIQELIQKLKFVTAVTFQDEV TMEEKVVESGVKQVCSQLNIKVQTFWGSSLFHRDD  
LPFHHSIQLPDVFTYFRKAVESQGIVRPTFAMPSQMKPLPEGVEEGDIPSHETFGQTCPLLDPRSAFPCEGGE  
TKALERLMIYFWDKNLI ASYKETRNLIGVDYSTKFAPWLALGCISPRYIYEQVKKY EKERTANQSTYWVIFE  
LLWRDYFRFVALKYGRRIFFPKGLQDKAVAWKKDCKLFDTWKEGKTGVPFVDANMRELALTGFMSNRGRQNVA  
SFLT KDLNLDWRMGA EWFEYLLIDYDVCSNYGNWLYSAGIGNDPRENRKFNMIKQGLDYG DGEYVRLWVPEL  
KEIKGDIHTPWALSSASLSHFNVHLNETYPSPIIVQPEWSR HANQKPANSSGHRGRGGS HHLPKQH KDRGI  
DFYFSRNKHSE

>Polypterus\_sen\_XP\_039620627.1

MQKKSSTKDSVKQLKAKKSKLLEDHDDYACKRQKLPEVTGGGKRLSDAICISRRETASSVAEFKFNKKRV R  
ILSKTEDIVDGS DGILYWMSRDQRVQDNWALLFAQRLALKQKLPLHVCFC LVPRFLEATIRHFGFMLHGLQEV  
AKECTELDISFHLLIGYAKDVLPEFVKLNHIGAVVTD FSPLRVPLQWLQDVKDRLPESIPFAQVDAHNIVPCW  
VVSDKQEYAARTIRKKIHDKLPEFLT EFPVVLHPHCTKIKTKEVDWEKARASLEV DHTVKEVDWAKPGTQGG

MAVLASFISERLKLYSSDRNDPNKEALSNLSPWFHFGQVAVQRAVLEVQKFRSKYRESVESFIEESVVRRELS  
DNFCFYNPYDSLDGAFEWARKTLEDHAKDKRTHLYSRAELEEGRTHDPLWNAQLQMVHEGKMHGFLRMYYWA  
KKILEWTHSPAEELEISYILNDRYELDGRDPNGYVGCWWSICGTHDQGWSERAVFGKIRYMNYAGCKRKFDVN  
QFECTYNYKKFTP

>Pomacea\_canalic\_XP\_025115306.1\_cryptochro

MMPELFKDWKITTLTTFEIDTEPYAMQRDDAIEKLAKSCNVNVIKRVSHSTLYDTEKTISKNGGSPPLTYQRLQT  
VLKEMGAPPKPSNTLTSSHLSVHVCLDCTTPWKEEFDEKYGVPTLAELGKNEEDCGPLLPFGGEMEALSRRMER  
YLKKTNWICKFEKPQTEPNLEPSTTVLSPYIKFGCLSVRTFYRLLDIYNLNKVYTKPPVSLHGQLLWREFF  
YTAGVGTANFNRMEGNPVCTQVPWDSNPEYLAAWSEARTGYPFIDAIMTQLRTEGWIHHLARHAVACFLTRGD  
LWLSWEEGQKVFEELLLDADWYLNAGNWLWLSASAFFHQYFRVYSPVAFGKKTDKNGDYIKKYVPKLRKFPAQ  
YIYEPWKAPKSVQAAAGCIIGQDYPKPVVDHDTISKVNIKRMAAAYAKRKEGQDFSGKSASPQKRKESTDSS  
SKKKPKKDD

>Pomacea\_can\_XP\_025078907.1\_photolyase

MRECLQVRLGWQIFCIFTDISPNFSSQHRRVSHLLLRKCKTKFVLGRAKPEISLQIFLQKPRSHNYKYPYFVN  
IKLCSSSKMDKEGSKKTTRIKNQKRKSELDSSSESTKKSRSSESLPGSKPLDDVDFVQQIAQCRTAACESIEAFK  
FNKKRVRLSEAKDCPDEGKGVLYWMSRDQVRQDNWAFLYAQLRALKLKLPYVCFCLVPNFREATIRQFGFM  
LKGLAEVEKECRNLDISFYLLMGKAKDVLPEFIKNNHIGGVVTDFSPLRIPSAWVTELSALLPKDVPFCQVDA  
HNIVPCWVASPKLEYSARTIRSKIHKVLNEYLTEFPPLIKHPKSPTMPKSVNWEKAAEFLEVDRTVKEVDWA  
QPGTTGAYHTLATFCNKRLKFYESDRNDPNKEALSLSLSPWFHFGQISPPQRCVLAVRGFRSRAKESVDAFIEES  
VIRRELTDNFCFYNNENYDSIKGAAKWAQDTLEAHRNDKRAYVYNRQQLAQAKTHDNLWNAAQIQLLKEGKMHG  
FLRMYYWAKKILEWTPSPPEALKEAIYLNDRYSIDGRDPNGYVGCWWSICGIHDQGWKERPIFGKIRYMNYEGC  
KRKFDVASFVKKYSL

>Pomacea\_can\_XP\_025095473.1\_cry-1-like

MTSLSPKKVVSIIHWFHRLRLHDNPALLESLKNADEFYAVFIFDGSVAGTATAAYPRMRFLLECLSDLDAGLR  
KLGTRLYIIHQPEEVFPRLFEEWGVSRVTFEQDPEPVWQDRDNKVTLCKQWKVEICIEKVSHTLWDPQSIIQ  
ANGGSPPLTYAMFCQVTDIVGLPPRCPQPDFKGVNLPVVDNKKDVMGIPTCEELGVYPESERQKNPLGGYVG  
GEQRALELLSLRIEKERKAFAFEKGQCLPNQNLNPDLTGLPLSLSPHLRFGSLSVRRFYWAHDAFKEVSQCEEVP  
TSITGQLIWREYFYCMSVNNPMYNCMEGNPICLDIDWYQNEQFEKWSKGQTYGPWIDACMRQLKEEGWIIHV  
CRHAVACFLTRGDLWIDWQMLKVFDKYLVDADWSVCAGNWMWVSSSAFEKVLQCPKCICPVRYGRMDPKGD  
YVRRYVPELKNMPLLYLFEPWKAPAEIQEKAGCIIGCDYPPPMVDHKQASKMCMKMEKIKNKRGLPHIAPS  
SAAEVRLFMWMDNKSLEESLAHCQKHVTEPETFSKATLPLGQ

>Pomacea\_can\_XP\_025096987.1\_cry-1-like

MKGKVTSPKKTSEGTMPKKNSIHWFRKGLRLHDNPALLEALKDSSSYRCVYIILDPWFAGSSQVGINKWRFLLE  
SLEDLDSSLRLKLSRLFVIRGQPADVFSRIFKEWNITQLTFEEDPEPYGKERDAAICALAAEIGVQVVTKPSH  
TLYDLRHILEANNQPPPLYRRFQSILSGLLPPVPLETVTATMLKHTHTPVADDHDDKYGVPSLEELGFDTD  
NLGPATFRGGESEALARIYRHLERKAWVASFERPKMSPQSLFPSQTGLSPYLRFGCLSPRLFYWKLTELYKKV  
KKGQEPPLALHGQLLWREFFYTAATNNPNFDMKSGNSICVQIPWDHNPEALAKWAEGQTGFPIWIDAIMVQLKK  
EGWIIHHLARHAVACFLTRGDLWISWEEGMKVFEDELLLDADWSVNAGMWWLSCSAFFQQFFHCYCPVNFGKRA  
DPTGDFVRHYLPALKGFTQYIYEPWTAPEAVQKAARCIIGKDYPLPMVDHTVSRVNMERMQRVYKHLVSS  
SVSGYKRKLDPPKIPKVDMLKANMFTSTSSDDDEQTSGMRLNKI

>Pomacea\_can\_XP\_025105331.1\_cry\_DASH-1

MKQLSIALKNRWTRTVYTAFFSSRVNAPGCFFSKHEKGIMKTVIYLFNRDLRLHDNESLYWACQNADTVLPVY  
CFDPRHFGKTWHFGFAKTGPHRLKFLVESVVDLRLGNLQKHGSDLMVRQGKPEDVIPDIISQLGKDNEALVYQ  
KEVTQEELDVEEALKLKSGVKVHTVWGHTMVHIDDLFPKPQTLNPAYTQFRKKVEESNRMRKELPIPDKLKPL  
PAKFDVGTIPTFDDFKIPMSVPVHTVFPFPGGETSALARLQSYFWETDNVAKYKDTNRNGMIGSDYSTKFSW  
LAHGCISPRRIYWEIKRYEQORTANESTYWVLFELLWRDYFRFVALKYGNKIFKVRGIQDKDIPWKKDEKLFE  
AWREGRTGVPIIDANMRELQATGFMSNRGRQNAASFLIKDLQIDWRIGAWEWFESILIDHDVCSNYGNWLYIAG  
IGNDPRENKRFNVIKQGLDYDANGDYVRLWVPELSKVKRGSVHVVTLSPAALSSAQVSIGESYPAPLVMAPE  
WRHHYGRPASDSVGKRGGRGPEPSPKQRGINFYFHNSSQQ

>Porphyra\_umb\_BU14\_0223s\_OSX75752.1

MQGHDAAFVPAGSSAFGVKVTSSATGRNNGVKAVSTASTPASFSPLTASAHSAIGATTGVAPTMPVMLPSL  
CDFGPFSESPAGRKGGKVLVWFRSDLRVHDNPALTHALEEAGTVVPVYCFDPRQFGKTSFGFEKTGRYRAKFL  
IESVTGLRDSLRLKLSDLIVRSRGPEDTLPCLCRRLGVSSVFYHQEVTYEEQEVEQALAESLKAAGVDFKPFW  
ANTLYHSEDLPFAVQDMPDVYTAYRESVESGGEIRSLPSPTEMPTVPSAVKAGPIPSLKLGLAEVPGEMAA  
VGGVGTFTGGAEAMRRLSSYIASVGEKAAAAGLNSRASTSSAAHMGADFCKISPWLALGCVSPRQIYQDLR  
SSAAAGAAVAKTTTTFFELVWRDFFRFITLKYGSVRLAAKSGKKATTHVRALATAGR

>Porphyra\_umbili\_OSX68520.1

PAAARAAPFTPTDPTVAVLWLRADLRLADNALLRAGADASALLPVYVFDPAAWGAPSAHTLYGTVKGGAHRA  
AFVTAABAEVRAGLAAGVSGGLAVRVGDPAAVLADVVARLLAAGTPVRVVASKEFCAEEVAAERSVAAALAGLT  
TPDGVPPVALQFVWEGTLTHLDDLGFNPLTDTPPVFTQYRKRMEGGPGGRDGLAVRPPAPAPTRLPLPGCVD

ATLLGAVPSLGLDLGLDAAAAVDGRAALDVRGGEAAASARLQTWMVDGDHLRHYKETRNDSTGTDAGSSKLA  
LATGCVSPRTVYAAIRRYEAATGVRDDNTYWLVEFELLTRDFFRWTAAGVPTLFAWRGHGSDRSRGDFAARRF  
APDTARFDAAWAGATGVPFVDAGMRELAATGYLSNRLRQNVASFLINELGCPDWRAGAAHFEATLVDYEPAA  
NWGNWAYIAGVGADPRGGRAFNTVKQGGVYDPAGAYTKLWVPELAALPPAQLWEVGKVDPATLAGYGVTLG  
>Porphyra\_umbili\_OSX72831.1

MLYVLEPAATTAPHTGAVRLRFLESLTALDGE LRARGSSSLHVARVADGADVAAEVA AAAARCGATT LVYEDD  
DSPAGRQRDAAVGAAAAAAGLAVVTRSGHTLYPPALLLDAAGGVAPRTMAAFTSLVDRVGP RPPLPTVGD  
DLPPPPPPPPPLGDGEAVADGAVPSL GALGWDA AAAAGLRVRGGEAAALQRMEAF LGRRGGAVVRAFEKPKTSMV  
AWRTPDTTVLSPYLAAGVLSPRTFYARLREVEAAGNGRHTRPPVSLVGQLLWREHFHLLAGSVPHFGRMAGNP  
LCRQIPWDDPSTDA AAAARHAAWATARTGYPAVDACMAQLRKEGWVHHLGRHLLACFATR GDLWLSWEAGAAT  
FEELLLDWD PALNAGNWMWLSASAFFNSYFRVYGPVTWMRKVDPEGKFIRHYLPALARLPTAYIYEPWKAPAG  
VQAAAGVRIGDGGDYPAPIVDHAVVSKVNI DRMAKA FRSGAAAEKGGNKAPAVKVGGVGGWGGGANAKPAAAT  
GAPSRGGRSAKAKADAA PVKTEESGGAGGLRTRSGRVSKKR

>Porphyridium\_pur\_KAA8493818.1\_photolyase

MERSVVEKERISKLN AAPVRERGKYVLYWMQASVRALRNPALEYAVERANDADVPVLVVFGLFEKYPEASERH  
FAFLLLECISDAGKQLEERGIEFVLVHQVPTTVVKALAADAVSVVTD RGYLRLLREWRSQVATEIDCRMVQIEG  
DVVVPVQLVSDKEETAARTIRPKIHKYMPKFLHPLERVTPKNTTGKAGMLASTLATLKEFELL DWRDPLAVLA  
KLDVDRSVPRVTWITGGATHAEAMLADFLKHKLKDF AANRNEPAQDFGSNMSPYLHYGGISVVHLVMEALKHK  
TSASKEGVDSFIEELVVRRELSMNLVFYNPHYDAYACIPNYARITLDEHRHDEREPTYTLQELEAGVTYDECW  
NACQREM VVRGKMHGYMRMYWAKKII EWTS SP EEAYERC LLLNNRWELDGRDPNGYAGVAWSFGKHDQGWAE  
R AIFGKVRYMNKQGLHRKFKMELYVNKIDKL VREVGLPPHLDEVSKQSTAHARKQQKTLSDVQPPQKKPKVK

>Porphyridium\_pur\_KAA8493823.1

MQPFGGRRDVARKTCGVVYAQTSVATMRMCDGAAIRPAFVSI PVTARKARASQFGAPWYPPRWQIQ LAVACAY  
RRSSSHIAMAASAAQTSKAAVAGKCVIAWFRADLR LRDNPMLMDAIRAGQGCVL PVYCFDPRCFGLTDEAKFP  
KCAAPRAQFLRECVEDLRNNLRALGSDLIVRHGHPEVVLTQLAEQYQCSHVFGSKEVAWEETRVEKKLRANMS  
KLEKPPKLSLTWGAVTMYHLDDLPMIDIDL PDVFSQFRRSVESRPAVEVRAPLLAPAKGALRPLPEGLEIGAL  
PSMDELLEATIPEASQRQFQQDSRAVL SFRGGETAALARVQYYLWESDCVAKYKETRNGMVGGDYSSKFSAWL  
AHGCVSARDIYHEIKSYERTRVANDSTYWLIFELIWRDYFRLLALRCGNDIFFLGGPRRRDKIQWKQDRKAFE  
AWRTGNTGYPLVDANMRELNQTFGMSNRGRQNVASFLTKDLRIDWRWGA EWFESMLLDHVDHSNYGNWTYAAG  
VGMDPREDRHFN VVKQAKTYDETGEYAKLWLP ELADVP AEFIYEPYKIPASERSR FNGLDQYPRPVVNTFGKG  
SFQAGGQGGRPDIQSGKKHRGPSKPRANARREPKY

>Porphyridium\_pur\_KAA8496724.1

MVASILLILDGFLPLIFFRPCR LDSYSAEVTDCSDAPASSGSVMNGLWNKLQLRHPPLPSSCCLDALSLCTFD  
QSPIQSDLLFEPIQSPFFVPAAVFTLHTSPRFVCVRCLMRRSSLHGMAILGWVAQTGLRSPGSLCPPKCCDRT  
RRYRRTAFAPTRFARALQTRVSLSPSREAAVPTDG VATSVAAPKKVCVVWFRRDLRLDDNPALYAAVAEHKYD  
LVVPLFIVGDDQDEL PDVFAATSRSCRDPFAHTAHSVYLQSSQLQSF SRRLKELGGAGLHV VQRGDQTVAAVLK  
AVCDSAKSTAVFFNARYEHGCAQQDERTIAALS RQGIIVHRCMGDLLFDPARIATAQQRQTRRTTHQODIEES  
DKNRKF AHWGTLTWFKRLAESSTPSSHHAALV PPIHSFSALEIHTLKEQSERILHTPLRRWGTKVMQYWEPEGE  
QTAQKALREFIDNGGLSAYERSKSRADMTGAVSKLSMRLRCGELSPRTVQNAFEKANVRHRAPILSRRLYWRD  
LAYFQALALFSDPLEPIRPQYREQTWPGTKEQADAWIRGQTGYPLVDAAMRELWETGWMSQNVRMIAASFLVHI  
LGVHWHVGLRHFHNALVDADVAINTMMWRNAAGVGVD SWNFSLDPVSDSRFVDPTGAYVRRWIP ELAHL PNEH  
LHAPWLASSREGLNYP ERIVTDLKSARERMMDFFRQAKIRHHATSSVSCNERGYDLVRVPGTKSETVLF TLPF  
LRKAVPKAQGMTEATAQSVSSSKSRKHGPKPKSKTASSRSSEKRALTRQLRDL S

>Porphyridium\_pur\_KAA8497133.1\_(6-4)DNA\_p\_

MTQPVLFWFRKSLRVHDNLALKRAVEYAAQHSATLV PVFVIDPHFVNPDKVG VVRMNFLLESLQDLSSTLQQH  
RAQQLLVLRGNPEQVFPDLLFARKGSESGISALFFENDTEPYAKQRDTRVGELARKADVHVESC YGHTLYDPD  
WLLKRARGGRPPETMSAFTALMESVGPPSKPVSAEDVMKSLANTPQDDELLRKQLMSEAQPLSIPNLAE LGYP  
DASPSRLFKGGESA ALEKLREFCARKKGECVRKFAK PETNPAAFEPPETTTLSPYMKFGCLSPREFYHRVESI  
RNSKSTQPPVSLIGQLYWREHFTLLGYVTPNFDRMEGNPLCRRIDWDTTPEYVSAWESGKTGYPWIDACMRQL  
VSEGLWHLHARHSVACFLTRGDLWQSWEVGKAVFEKHLIDADWSLNAANWMWLSCSAFFHQYFRVYSPSAFPK  
KYSHVAAFIRKYVPELRAMPDAYLLEPWKAPEKVQREAGCLIGKHYP SRVVIHEDISKENIQRMKRAFELNKT  
ERPSSTGTKRSREE

>Portunus\_tritub\_XP\_045110316.1\_LOW\_QUALIT

MPMGKVAVHWFRHGLRFHDNPALLEALQDAKM FYAIFIFDGESAGTKVTGYNRQRYLTESLLDLDQQLRDVGS  
QLFVCEGNPVDIFSTLHKEIGLTHLSFEQDCEAIWNKRDNAVRKLCSELGVTVIERISHTLWDPFEVIEANGD  
QPPTTYEMFVQVIKVLGDPPKPSNPNDWENVLFGNISDEVAQKIKLFPQVPSVEEQGYTRI ECPVYIGGEKV  
ALAH LQERLIVEENAFRDGYILPNQVNPDLLGPPMSMSAALRFGCLSVRKFYWDMQETYQKINRGEPPASHSL  
TAQLIWREFFYCMSANNPKYSEMEGNPICIQIPWYKKPGELAAWEEGRTGYPFIDACMRQLRKEGWIHHCRT  
VVSCFLTRGDLWISWVDGLKV FYKYLIDADWSVAAGNWMWISSSAFERQLDCSVCPVEYGRRIEPTGDYIR

QYVPELANFPQEFIFEPWKASLAIQKEHNCIIIGQDYPERIEXHTEASKSNSKIMKSIRKRLKKPPRHCSPSDS  
EEIKQYLRLPQSCFHNVF

>Portunus\_tritub\_XP\_045118419.1\_cryptochro

MTGEANKPKPKHHSVHWFRKGLRLHDNPALRAGLKNVTFRCIFILDPWFAGSSNVGINKWRFLQLSLEDLDT  
SLRKLNSRLFVIRGQPAHVLPELFREWGTTCITFEKDPEPFGKVRDANIVAIAREMGINIVKTSHTLYKPEK  
IIDKNGGKPLTYKSFQNILMSMDLPPLPLSTITLDDLENKYTPLNDDHDEKYGVPSLEELGFDTESLQQTGW  
KGGENEALTRLEHHLERKAWVASFGRPKMTPQSLYPSRTGLSPYLRFGLSCRRFFKELNDLYKKIRKSPPPL  
SLHGQLLWREFYYTAATNNPKFDHMEGNPICVQIPWDKNPEALAKWANGQTGYPWVDAIMTQLRNEGWIHNVA  
RHAVACFLTRGDLWVSWEEMKVFEDELLDADWSVNAGSWMWLSCSSFFQQFFHCYCPVRYGRKADPNGDYIR  
TYLPVLKNFPTKYIHEPWTAPESVQRASKCVIGRDYPMMPVDHIKQSQNNIERMKQVYQQLAHYRGKINPAIK  
SPTMDHYPSPPPDFEKKRNKTGKSDIQRDSNYRVQVQA

>Portunus\_tritub\_XP\_045118530.1\_cryptochro

MTTVHWFVRKGLRLHDNPALLAAVKEGAELRPVFLDPWFVKHARVGINRWRFLSQALRDLDDSLRKLKSRLFV  
VRGSPPEEVFPALFKKWDVQKITWEIDTEPYAQRRDEKVERLARESGVEVVCRRHGHTLYRTEKIIIEANLGKAPL  
TYVSLEKVVSKLGHPPKPVDTLNDLPESCHVRGEAATDVSYDVPSLKELGVEESQLEPCLYPGGETEALARK  
IYMERKSWVCKFEKPKTSPTSLQPSSTTVLSPYLKFGCLSPRVMYHQLIQIYKGSASHKPPVSLLGQLLWREFF  
YTVGAVTPNFDMEGNTVCRQIPWVRDDKLMDAWTNAARTGYPFIDAIMTQLRKEGWIHHLRSHAVACFLTRGD  
LWQPWEDGMKVFEELLLDADWFLNAGNMMWLSASAFFNSYFRVYSPIAFGKNTDKHGDIYRKYLPQLAKYPEN  
YIYEPWKAPLATQRAAGCIIIGQDYPRPIVDHSIVMKRNLDRMAKAYKAGKEKKASSDNQSSPKKKMKK

>Portunus\_tritub\_XP\_045130719.1\_cryptochro

MAVSGLTFLKLIISSGNKILSSMSEGSSRVAICWLRNDLRYHDNEILLKANINADQVLPVYCYDPRHFKGTYHF  
NFPKTGSHRARFLLSVANLRNTLREKGSDLVVRLGQPEQILPLLKSLSARECHIVYQEEVTKEEKDVEIKL  
KENCRRQFGVKFHLWGLTLYHRADIPFPVSRVPDITYTGFRKAVEAQSLVRAPLVMPDSMKPLPPDIDVGQLPT  
LAQLGVKEQSIDRRTAFPFSGGESHLARLRQYLWETDNVFTYKETRNGLLGSDYSTKFSPLAHGCLSPRHI  
HAEVRRYEKERQANQSTYVWLFEMIWRDYFKFVCMKFGDRVFYPSGIMGKKIRWKKDHLMFQKWKEGRTGIPF  
VDANMRELQETGWSNRGRQNVASFLIKDMGLDWRLGAEFWESQLLDHDCVSNYGNWNYAAGIGNDPRENKRF  
NMIKQAFDYDPKGDFVRCWVPELAGLKEAMIHTPWKLTGNQLTSAGIALGDTYPNPILVAPEWGRHQHKGMQG  
KGPAFKGPRQRGIDFYFKSPPKV

>Portunus\_tritub\_XP\_045137570.1\_photo-lyas

MQRPRCIQRLRLHAAALTNLGHFPFPAFISRSVSSNTMSNGEPQAKKHKPDPDSLDIHRRLEKARRDEA  
ESILDFKFNKKRVEMLSKADEVPDCDGIVYWMCRDQVRQDNWAMLFAQRLALKYKVSRLRVFCLVPKFLDATI  
RHYHFMLKGLEEVESECQKLDISFNLLGEPVDVLPDFIKSHNIGGLVTDFSPLRVPRRWLKEVKKNIPQNI  
MCQVDAHNIVPCKKASDKQEYSAKTIRKKIHDKLSDFLTQFPPIKHPYKSKEENEAVDWEAAEKSLEVDRTV  
KSVEWAVPGTKAGLDTLNEFCLKRLRKYATQRNDPNVNALSNSPLWHFGQVSAQRCVLEVKKYKKQLKEGVD  
GFVEEAVVRRELADNYCYQENYDRIEGAYQWAIITLNNHKKDPRPYLYSLETLMELTHDELWNSAQIQLVK  
EGKIHGFMRYWAKKILEWTASPETALETAIYLNDRFSLDGRDPNGYVGCMMWSICGIHDQGWGERDVFGKIRY  
MNYDGCKRKFIDGYVSRYGGKKHKYIPPSK

>Potorous\_tri\_Q28811.1\_photolyase

MDSKKRSHSTGGEAENMESQESKAKRKPLQKHQFSSKNVQKEEKDKTEGEEKGAEGLQEVVRQSRLRTAPSV  
LEFRFNKQVRRLISQDCHLQDQSQAFVYWMSSRDQVRQDNWAFLYAQRLALKQKLPLHVCFLAPCFLGATIRH  
YDFMLRGLEEVAEECEKLCIPFHLLGLPKDVLPAFVQTHGIGGIVTDFSPLLHHTQWVKDVQDALPRQVPFV  
QVDAHNIVPCWVASDKQEGARTIRHKIHDRLPFLTEFPFVICHPTYTSNVQAEVVDWNGCRAGLQVDRSVKE  
VSWAKPGTASGLTMLQSFIAERLPYFGSDRNNPNKDALSNSPLWFHFGQVSVQRAILEVQKHSRYPDSVTNF  
VEEAVVRRELADNFCFYNNKYDKLEGAYDWAQTTLRLHAKDKRPHLYSLEQLESQKTHDPLWNAQMOTVKEG  
KMHGFLRMYWAKKILEWTRSPEEALEFAIYLNDRFQLDGDWDPNGYVGCMMWSICGIHDQGWAEREIFGKIRYMN  
YAGCKRKFDVAEFERKISPAD

>Powellomyces\_hir\_TPX57374.1\_PhCBS80983

MVKTIALVLLRNDLRVHDSPLFAAHNHPQTTHILPLYVFDPRQIDLSCVPLNFVSHYKPFVPLTHFYKFRPC  
GGWKARFLVESVKGLGHGLREHGSGLAVGFGMPGDVVAEVVKELESKGDKLSGIFLSKEYTHEEVCVEEAIAA  
KTPQVPLHTYHSSTLYHPDDLPFKAAETPLIYTQFRLRVEPIRDLIRGPLETPDRFKPLPSFPDVPLVIMSDA  
IELSWFVEPKYLDKSDKSAVPFEGGEKQGLARLNSFISRDRKSPVSTYKATRNGLLGADYSSKFSVFLANGTL  
SPRQIEAALKHYETTVEKNESTYWLWFELVWRDYFKYISWRFGKSLFFERGFANDTKKQIDWKKDQSTIDGWV  
AGKTGVPFVDAAMQREVASTGYMSNRSRQNVASFFCHDIYQHWLIGAEWFESVLIDHDCVSNYGNWQYVAGVGT  
DPRSNRWFFNVVKQGREYDQKFIKRTWCHELRDVGDVHKVPQAADGYPPQLVNTKAWDTAKPREMGKEGNRN  
ERVGKIDNGKRRLGKSRKNKKQGGEQV

>Powellomyces\_hir\_TPX58310.1\_PhCBS80983

MPLQKRKAELAICETAGGEEVVKVRADMRGGAEEAGGEEQAVEEPVGLSHAAADALSAATSATVEEPTMPQP  
TCLVWFKSDLRVRDNPALYAATTFEPGTANINSGMKQIRVGGSATTAASASNLPIALFLINVAEWALHDMA  
PLRADFILRNLECLKHELAQLHIPLIVRVVEPDAAANHIEDRHHVPAAPTAVLEVARRVHARHVFFNREFEVD  
ETRDKATQHMLEADGRTVHTFQDQCVMDPGSVRTKEGKVYKVYSMFRTTWITHVVRDRMWDKLTDPDRPNPK

GACGAGSAVAAYLARWSEVPTQLAGDVLRLVDPAAQAILARTHFPAAGEAEAHARLATFLADRSMPYTTTHRDIVAQ  
AGTSSSLSPYLSSGILTTTRQALHAAMRANNGRIEGGSAGLAKWISELVWREFYRHLVAFPHVCKHQPFKPEYK  
NVPWLNDPLAFDAWTRGRGTGYPIVDAGMRQLNTLGWMHNRRCMITAMFLTKHLLHDWRRGEHYFMQHLIDGDF  
ANNNGGWQWSASSGVDPQPYFRIFNPLLQSQKCDPDGTYIRHWVPELTHLHGKALHNPHAELPAAEFARLGYP  
TPIVDHKFARQRCCLKAFKLTALGKM

>Powellomyces\_hir\_TPX58791.1\_PhCBS80983

MLPPPQHPHACTAPISTPAPRPNVLLWIRAKTLRLHDSPALHHALSLHPSHLHIVFCFDPFYTTTHVRVGTTTRW  
QFLLSAARDFDSALRKLGNRLIVPRGKPGKVLVPLWDRWGVTHLVYERDEEPYPKQRDGEVEEMAREKGIVCA  
RVVGHTIWDPREVAKVNGGRPPLTYAAFLSLVEKKLPRFGPPIPPPVGPLPPHGGGLAVLECEPCDVWPEGKII  
FKHWRGPDGSCSVPTLTTELGLPEAPPPLHRGGETEALRRLSAYLSSTTLVAAFEKPKTSPTQFSPSASTTVLS  
PYLKFGCLSARLFRDRLLATYAKHTGRHTHPPVSLLGQLYWREFFYAVAAHTPNFDRMEGNPLCLQVPWRLRD  
RTDADVDALRDFEAWRTARTGYPWIDAIMTQLRTEGWIHHLARHAVACFLTRGHLYISWERGAEVFEQLLIDH  
DWSLNTANWLWLSASAFYTQYVRVYSPVAFPKKYDPSGEYVRKYVPVLRDVPAEWIYEPWKAPLSVQKRARCV  
VGVDYPERICEMEEARKRNIERMVAYKEGVRGSVDLQRSQTTSSIPTTPVRAIQHDDVPAMLHVDHAHTLTSS  
SNVPPLSAVDVPAASSVSGETSSPADAPRRSAGAKRTIDSFFAPIKKPKHGR

>Probosciger\_ater\_NWS41259.1

RFLQLSLEDLDNLSRLKLSRLFVVRGQPTDVFPRLFKEWGVTRLTFEYDSEPFGKERDAAI IKLAKEAGVEVV  
IENSHTLYDLDRIIELNGHKPPLTYKRFQAIISRMELPKKPVSTVISQQMETCKVDIQENHDDVYGVPSLEEL  
GFPTDGLAPAVWQGGETEALARLDKHLERKAWVANYERPRMNANSLASPTGLSPYLRFGCLSCRLFYRLWE  
LYKKVKRNSTPPLSLYGQLLWREFFYTAATNNPKFDRMEGNPICIQIPWDRNPEALAKWAEGKTGFPPWIDAIM  
TQLRQEGWIHHLARHAVACFLTRGDLWISWESGVRVDFDELLEDADFSVNAGSWMWLSCSAFFQQFFHCYCPVG  
FGRRTDPSGDYVKRYLPKLGKGFPSRYIYEPWNAPEVQKAAKCIIGVDYPKPMVNHAETSRLNIERMKQIYQQ  
LSRYRGLCLLASVPSCVEDLSGPVTDASASQGCSTSTAVRLSQADQPSPKRKHEGVEELCTEELFKRAKVTGL  
PAPEVPGKS

>Probosciger\_ater\_NWS41534.1

DNWAFLYAQRLALKQELPLYVCFCLVPKFLEATIRHYGFMLRGLQEVAEECAELNIAFHLLRGYAKDVLPAFV  
VEHGVGGLVTDDFSPLRLPRQWVQDVRERLPEDVPFAQVDAHNIVPCWIASPKQEYSASTIRGKIHAQLPEFLT  
EFFPPVVRHPYPHSCPAEPIAWEACYSSLEVDRTVKEVEWAAPGTAAGLAVLQSFICKRLKYFGSHRNPNKAA  
LSNLSPLWHFGQVSTQRAILEVQKHQHKYKKSVDVFVEEAVVRRELAENFCYYNENYDSLQAYEWAQTTLKL  
HAKDKRPFLYTLQELEQGTTHDPLWNAQLQMVREGKMHGFLRMYWAKKILEWTRSPEEALQFAIYLNDRYEL  
DGRDPNGYVGKRLWSICGIHDHGWTERAVFGKIRYMNYAGCKRKFDDVGQFERRYPP

>Probosciger\_ater\_NWS44089.1

KVDYDVC SNYGNWLYSAGVGS DPRDNRFNMVKQGLDYDGN GDYVRLWVPELQGIKGADIHTPWALSSAALSQ  
AGVTLGETY PQPIVTAPEWSRHINQRPVSTGKEISRHRPRGRGPAHPSVQHKDRGIDFYFSRKDA

>Probosciger\_ater\_NWS47685.1

MGVNAVHWFVRKGLRLHDNPALRECIQGADTVRCVYILDPWFAGSSNVGINRWRFLQLQCLEDLDANLRKLSRL  
FVIRGQPADVFPRLFKEWNIAKLSIEYDSEPFGKERDAAIKKLASEAGVEVIVRISHTLYDLDKI IELNGGQP  
PLTYKRFQTLISRMEPLEMPVETITPEVMEKCTTPVSDDHDEKYGVPSLEELGFDTDGLPSAVWPGGETEALT  
RLERHLERKAWVANFERPRMNANSLASPTGLSPYLRFGCLSCRLFYFKLTDLYKKVKKNSSPPLSLYGQLLW  
REFFYTAATNNPRFDKMEGNPICVQIPWDKNPEALAKWAEGRTGFPPWIDAIMTQLRQEGWIHHLARHAVACFL  
TRGDLWISWEEGMKVFEELLLDADWSVNAGSWMWLSCSSFFQQFFHCYCPVGFGRRTPNGDYIRRYLPVLRG  
FPAKYIYDPWNAPEVQKAAKCIIGVNYPKPMVNHAEEASRLNIERMKQIYQQLSRYRGLGLLATVPSNPNGNG  
NGGLMGYS PGESISGCSSAGVFTVSPGAQLGTGDGHTIVQPCALGDSHTAGASGIQQQGYCQASSILHYAHGD  
NQQSHLLQAGRTALGTGISAGKRPNPEEETQSVGPKVQRQSTN

>Protomyces\_lac\_XP\_040725890.1\_DNA\_photol

MARTLLYLHRHDLRLHDNP ILEQIRKGQYDSFLPVYIFPAHQIEVNPLLRAEHQGAHKELRASFGTRRTGNV  
RVSYLCESLWDLKRSYAKLDVNMLITAGKTDDVLKSIDKLQAHSAQIEVWLQKEYTTEEREEEA AIMAVCK  
SNKTVAYKTVEESTLVDISDLGYPIDKLPNYYTEFRKGVEPLDSVRLPFEAPKHLPPSPKITFENEYEIISDDM  
DKVIEQLCAPLGGRCDIPQNTAHPMKGGETA AIKRL EYYVTGGKSAPAASYKTTRNGLLGSDYSTKFSFSLSV  
GSLSPKLIHRLQLFEKEHNLEGDVNTYWIRFELLWRDYFKFVALKFGKRMFLKYGLKQAKLNDQWL GADSRE  
AMRWKEGTTGVGIVDAAMRELKATGYLSNRARQIVASFLT KDNLNVDWRIGA EYFEEKLIDHDPSANYGNWQYQ  
AGVGNDRPRTSRRFNPAKQAHDYDPDGAYIKTWCPEVAKATVSMNWVYFWTTTPPKLQQTLGIAGLEGVRDPVKGL  
LCGDERERNSSRGVPGYRKKARRHEGRPRRGERTASYDS

>Protomyces\_lac\_XP\_040727286.1\_FAD\_bindin

MAEWQQCPTIKRAKEIDESDPYRTLGEALEDNVL PETTKNVLHWFRSKDLRIQDNKALHAASQKAE EADAPLV  
TLYVHSPAHLQWHGTS PARTDLILRTIKMQADLKKDGIPLYILQTETRQSLVPDVLKFIADNDISHVFANFE  
YEHDELMRDIKLARKLKDAKTSFEIMHDQCAVDPGTLTTGSGTPHKVFTPYHKAWLAEMSANGDSL LSLVPPP  
SPNSEEQHAKLEDMGLFKSPMPTIPKEKTFKNDEERDRIRKLWPAGYEEAHRRLVKFLDTKAKDYHLKRSEPS  
ADATSRMSPYFSSGTISVRETLALCRQRNKNSLDFSGSKGKGISGWVREIVFREYYRQLTYVFP HKSMNMPQN  
LKMAAVAYVTGKEADDNYQKWCEGKTGFPLVDAGMRQLNHEAWMHNRARMNTASLLRTNMLIDYRRGERYFAE

HLIDWDMSNNSQGWEPSTYVFNPTTQGENNDPTAEYIRKWCPELKDLDNKKIFAPFERCTRQEFEEALDYPEPV  
VDWKETKVRAIEALKHATATGEH

>Protomyces\_lac\_XP\_040727966.1\_DNA\_photol

MGAARVIYWFRTDLRLHDSALHAALELKPEVLYPVWTWDPHYVYHARVSSNRWRYLLDCQADVDKRIKKLTG  
SNGLLVLRGNPLNLVKQALQDWKITHLVFEQDQDTYALSRTQVRAMAELGKGVVSKLGRTLWDPIELNKVH  
GGKPVMTLAAVQKLGSQIGPVPRPIEAPTSLSAGDTKLEAPKDEIQDAPDLNEPARGDGRVTSYDQVAGPNG  
DYSVPTMEEINIKPAEGPYRGGETLALALEAYMADKKKTATFEKPKTNPGVFHPPETTLSPHLHFGSLIR  
TFYWRVMDVCKAYGSGASKPPASLEGQLLFRDMYFAAQCGIDNFEQTLGNAHCRIYIPWRLQEPDEEAEAWLE  
AWTHGRTGFPWIDAIMRQLRRDGIHHLARHSVACFLTRGHCIYAEWEGAQVFEELLIDHETACNVGNWQWLS  
CTAFFSQYYRVYSPVAFGKKWDKSGALIREFVPELKNVPDKYIYEPWLMSKVDMKAAGCILGQDYPKRIFDEK  
EQAKVALAGMKEAYDAKLYGDSPOIGKTKSPESPVKSGKKRGQQSLDGFAGKAKIEPAEEHEANEA

>Protopolystoma\_xen\_VEL28982.1

MLVSSCISGYTIGPARLGAHSAKETLRLHAKDVRNPAYSSKQIEFAQTGDHLWNSAQLQMVREGKMHGFLRM  
YWAKKILEWTAEGPEEALALAIRLNDKYSLDGRDPNGYTATNKVLLLQDACGQYAEFTTKDGPVQYTAR

>Protopterus\_anne\_XP\_043923143.1

MSGIRTVICLLRNDLRLHDNEVLYWANLNAENIVPLYCFDPRHYGVTHNYNFPKTGPFRLKFLLEGVKDLRET  
LKKKGSNLLMRRGKPEDIIQDLIKELGSVTAVAFHEEVTAEELNVENNVKQVCFQLKVNVTFWGSTLYHRDD  
LPFRHISRLPDVFTHFRKSVETQAKVRSTLQMPPEMLKPVPLGLEEGSIPTYEDFSERDPLTDPRTVFPFSGGE  
GPALARLKHIFYWDSNLVASYKETRNGLIGAEYSTKFAPWLALGCISPRYIYEELKKYEKERTENESTYWVIFE  
LLWRDYFRFVALKCGRKIFFLKLGLQDKEVSWKKDQRIFDTWKDGKTGVPFVDACMRELALTGFMSNRGRQNV  
SFLTKDLGIDWRMGAEWFEYLLVDYDVCSNYGNWLYSAGIGNDPRENRKFNIKQGLDYDANGDYIRLWVPEL  
KDIKGGDIHTPWTLSAALHTAGVNLPEYIPLPVVIAPEWSRYINQKTTGGARGANSNGPEVRKGPSHTPRQHR  
NRGIDFYFSHNKKHY

>Protopterus\_anne\_XP\_043926648.1

MTDFAMSETIEEQVSTDGSVKSRSENSKTDLEVNTTGKTKKDEASKEKQKKAKRKGNTSESETDDQKLKSSMK  
RKTEQSAKQDKKTLQSEMSSKESLSGSGGKSKIESDPANNGDLVEAVKKARLKAGSSVEDFKYNKQVRHLI  
SENDDLKNGAQGIIYWMSRDQRVQDNWALLYAQLRALKQKWPLHVCFLVPKFLDATIRHFGFMLKGLQEV  
ECKDLNIPFHLIGYAKNKLPPQFIKDHNIGGMVTDFSPLRVPLQWVQDVKENLPKDVFPVQVDAHNLVPCWIA  
SDKLEYGARTIRRKIHDKLPQFLTEFPVICHPTYANFKEQPIDWGAAYESLEVDRSVTEVEWAKPGTLA  
MLESFIEERLKYFHTDRNNPNRTALSNSLPWFHFGQVAVQRAILEIRKHKRFRESVDGFIEEAVVRELADNF  
CFFNKKYDSLEGAYEWAKTTLKIATDKRSHVYTLKQLEEGKTHDPLWNAQLQMVREGKMHGFLRMWAKKI  
LEWTRSPPEALEWSIYLNDRYELDGRDPNGYVGCWMSICGIHDQGWAERPVGKIRYMNYEGCKRKF  
RKYSPKNLCP

>Protopterus\_anne\_XP\_043936748.1

MTHYSVHWFRLRLHDNSALLAALQDCKEIIYPIFILDWFPKNCVSVNRWRFLIESLKDLDESRLKLN  
FVIRGNPAEVFPCLFKDWKVTRLTFEVDTEPYARQDAKVVKLAEHGVVQVRSNTLYDTERVIEENNGK  
PLTYVRLQTLSSLGPPKKPVPAPSLELMRNCQTPCKDLHDARYDIPTLEELGKSSAEAGPHLYPGGETEAL  
RLEHYMQRTSWVCNFQKQKPESTPNSLDPSTTVLSPYVKGCLSAFTFWRLSETYQGRKHSQPPVSLHGQ  
EFFYVIGAAIPNFDVMGNPVCTQVDWDDNREYLQAWAEGRTGYPFIDAIMTQLRTEGWIHHLARH  
RGDLWISWEEGQKVFEELLLDADVSLNAGNWQWLSASAFFHQFYRVYSPVAFGKKTDKNGDYIKKYL  
PAEYIYEPWKAPRSIQQQAGCIIGTDYKPIVLHEQVRKRNIERMKAAYARHAATKKDSMESPKKGTCTSDH  
ESLTDALKKKKRKLNN

>Protopterus\_anne\_XP\_043938505.1

MVVNSIHWFRKGLRLHDNPALQAAIRDADTVRCVYLLDPCFAGSSTVGINRWRFLQSLLEDLNSLRKFASRL  
FVVRGQPTDIFPKLFKKWNITRLTFEYDSEPFGERDAAIMKLAKAGVEVIMKNSHTLYDLNKIIELNGNSP  
PLTYKRFQTIISKMALPKKPVETVTPQEMERCRTNISENHNEKYGVPSLEELGFSARNAPPVMWHGGESEALS  
RLDKHLERKAWVANYEKPRMNANSLASPTGLSPYLRFGCLSCRLFFYRLLELYKTVKKNGTTPPISLYGQ  
REFFYTAATNNARFDRMERNPICVQIPWDRNPEALAKWAEKGTGYPWIDAVMTQLRQEGWIHHLARH  
TRGDLWISWEGMKVFDELLEDADFSVAGSWMWLSCSAFFQQFFHCYCPVGFGRMDPSGDYIRRYLP  
YPTKYIFEPWTAPESVQNEARCIVGVHYPCPMVNHGEASRLNVERMKQIYQQLSHYQGLCLLASVPAC  
VPLAEACGSHCNMTPLNDSTSSKRRRESSSLETEDEELERTKSKYLCISE

>Protopterus\_anne\_XP\_043943524.1

MGVNVVHWFRLRLHDNPALKESIEGAESVRCIYILDWPFAGSSSVGINRWRFLQCLELDANLRKLNSRL  
FVIRGQPADVFPRLFKENINRLSFEYDSEPFGERDAAIKKLASEAGVEVIVRISHTLYDLNKIIELNGGQ  
PLTYKRFQTLVSRMEPLETPVETITAEAMGKCTTPVSDDHDEKYGVPSLEELGFDTEGLASAVWPGGESEALT  
RLERHLERKAWVANFERPRMNANSLASPTGLSPYLRFGCLSCRLFYFKLTDLYRKVKKNSSPPLSLYGLLW  
REFFYTAATNNRFDKMEGNPICVQIPWDRNPEALAKWAEKGTGFPWIDAIMAQLRQEGWIHHLARH  
TRGDLWISWEEGTVFEELLLDADWSVAGSWMWLSCSSFFQQFFHCYCPVGFGRKTDPNNGDYIRRYLPVLRG  
FPAKYIYDPWNAPLSVQKSAKCIIGVNYPKPMVNHAESRLNIERMKQIYQQLSRYRGLGLLASVPSNANGNG

GLLSYLPGENTPSCSNSSAGFGQGSTMLRYPQGDIQMQNNTLLQVRNPVYNNITNGKRPNSEEEEMQGIEAKLL  
KQSGI

>Pseudo-nitzschia\_mul\_VEU36634.1\_unnamed\_pr

MFEVFLGSPTTPTRSILQYIVAALLLPICASLSTTIPPTMTKGKVVNAMHWFRKGLRLSDNPALXACLEQXPK  
NIYPVYVLDGNSYQLLRCSPLRANFLVECLQDLNLRRLTGLSRLYVLSGDPTVVLPKEKWEWEITDLSYEED  
TGEPYALQRDEKIVNLAQISDIRLFTAQSETLYPLKDYVAKSGKKPVPGMTAFQKLFGGMPTMKKVLSHPSK  
DQFPRNENLDELSKLYLPPTHPTDLPWPRGIPKAEVDSLWDASDCVNLAPVVHGETLARKALKKKLKDANWV  
ATFEKPQTSCTSLEPSTTALGPYLSWGCLSPREWFVFAIDKAIKSSVTKVSKPPVSLHGQLLRDFNNLMAHD  
ANIHHPGSWNHMEGNKYCRQIPWDDDPKLVEAWKEGKTGFPWIDAAMRQLAQEGWIHHLGRHAVACFLTRGDL  
WQSWEEGAKHFEAQLLDADYALNGFNWMLWSCSGFFYQYFRCYSPISYQQKNDPTAEYIRKYLPELKDVPKKY  
IYSPWEAPPLVLENAGVRLGKDYPYPLVDHKIIVKENMGRMKQAYDDHKAVEAEKAQAAKAAAAASKNSSSS  
SAQSRKKRQKTK

>Pseudo-nitzschia\_mul\_VEU40361.1\_unnamed\_pr

MGGDSAVARDCFPKTTTHWCYVLLVVAVAAVTPAFSLALPPPLRKNDCCGFHPRRQRTAQTRTTRMQRQMLKR  
DAETPSLVRRKRRLVWHRNRDLRFHDHPFYGGGDRGVPTTSVFVFDEPAPVAGKGGAIGSDPFVPTRPSTCLP  
GDWGTVPNLGPHGMRVLLSVEDLRRQSFLPKRPQGQSQSQPQPEQLVVRGPTVPVLMGLLEELVTLDES  
ESSECEYEYEVWCWNEEPGWHELELSGAVRDAILDYRGKGCEPSSYGGKTHKRKQVVVTLRTALSCTLYHPDD  
LPGAGSWTPMSKKEKRRLNQKRQKQLLRGGGGKDPGSLPSEGLPGAAPRTTGPHDLVDLSVERWSGM  
PRIMGDFRRIARERAGVRACDSHSSDALGAARDAVLHGADTDARVRSFDAATKEPPEAAGGGIDPGMPPTLES  
LLEPLLLYVGDEYDYGKKPILGLPPAVIREACYNISIRIHQKNRGESAPAGRGSPEAGVANTTTTMITGGETA  
ALKHLSDFCNHHLHRAERSLACVDDHQSSHLGQYLAFGCLSPRTVVGVAADAAIAKRQAQGGNDGGEPHPSG  
ETRKNHNKNNDSDNASRVRGHNARENDGTWLVSHMTMRDFFLYTCLASGKKFYRLEGIPISQKQAAAMEWKPF  
FPEPQTRTPTPHGHKRGSTPLPPSPTRSGKEPSEALDLWRATGTTGLPLVDAGMRELLATGYTSNRVRQNA  
ASVLAKDLALDWRAGAWEFQFLLADHCAANWGNWLYFSGVGPDPKQRHFCTVSQALKYDPSGAYVRKWLP  
SLRDPPEREEGREGVREGVRHPDFHLRPWDFDGSWPTPIVDPDSQYTWERELRLKTTGRLTE

>Pseudo-nitzschia\_mul\_VEU43758.1

MGKAAPTFEFFRLLLSITNTKGTTRLSSQGRBTSTSQRLTPRTTATKTTRASSLFLPGYYGLSITYCWLFAA  
VSTTSLSSAFAPQIFPSHRLSPSATKAYSTSKASAPTIANPGQKAVSSISMPFPYVFDGDRSVPSSELP  
LPPQTRVLTTETETVSNKGAKGXDDCVVYWMQRDVRTVDNWGLLLAQHLAQEKGLPLRVVHVLASPSPLPDTG  
GEDDETSSEDDTPPPLESRLTERHKGFLGLKCVHDELKQKNVPFDVVHHTSETPEDESNAVLEXFVNVH  
KPSVVVCDTSLVRNPRRWNESPSFRDALDAMGVPLYQVDAHNVPPIWYASPKREVGARTLSKLHKVVDCLQ  
NKDYKGLIPDFVGNHVNLSKAMEKEASKDFDYDSHVRFLEWDDSVKSVLREKPGTEAGIKKFEAFTXTGLR  
HFSMLRNDPNNDLVCSXLSPWFNHGHSFATCMRILKGHNRADEGKASFVEEGFVRRELSDNFLWYAPDTYDT  
LEAGAQAQDSLELHRHDPREYIYSLREFERAKTHDDLWNAQQLQVVRTGKMHGFLRMWAKKILEWTSSPAD  
ALRYAQYFNDKYALDGRDPNGFCGVAWSIFGNHDMGWKEREIFGKIRFMNYNGCKRKFVDQFVKKHPPAAKN  
AXKAAVNKEVASRTIHRNQIAIANTPAVPASSTSSDSEAEQTPKRRKTTLNKXKRKQKTSASADDSSEDEVEDL  
SGLSKSAASRKTVKVLKAYIQSKGVS IKDDNGKPLLKAGLVDALMSMS

>Pseudo-nitzschia\_mul\_VEU44083.1\_unnamed\_pr

MLSPIQHSTFLILSTILYFLSAFLVLSSRHLVFSFSSTQRMHSGSDGKNSHPPHQLLFSSPSPMLLSQMPIPV  
RVELFLPNRTNKKKKKPPNGAVRANKDDRGLVDRIRLFEEHGITSFNIVNKDKTDKDSVVEWETIRNASLKA  
SNSTDVHVCQSQFSLHNRPPKTRNLDRQKEHLETLKKGYFGAADEILLVSGSGTKPLSSSPCSETPWNTAD  
GIDAVNDYYENRGDNDVCQTTFPHISVSYNPYLSDFHLQDQENSRLERQLATGCLSKIYLPFGTDLRLRTGL  
EFCADAIHTAKRKHQRAGDVSLVGSFVLPTPRWMAHQKFRSSQKRVMLDPRFFKSDENQELTAIVVQVIRM  
YEKHGFGELLLEASPSANTLSCTKDDLSFLFDILKRVASRDDGLGPNRCNDSERSSSMGMNFRNNSNGVDF  
SSNSKGTGTGAESSQSPEILKKSPLSSLRQDWSRSSSPCILLFGSHDVRQLQDNKALEAAARSHKKLLPVFLW  
TKEERDGDQWGCPRNTAVAVCLEEALKSLQDSLQSFGLPLIYCNC CGSPRHD SREEQLHQQENSHGIRELKH  
VVEAVGATAVYWNKDPTPEGRDRDAYRRRILEQHRLPRRIDVFEAQSSLLYDVSTIELPTGFRGGHFGTLMFP  
LNHCRKQFGVPSRPTPYFETFRILEESSPPEAFDTIFDMHGSTMSTHLRDLKIIDTFKLSHKWDQPIRARFPM  
SEKIAQSTVDSFVRNGMKRYETDRSRADISATSRSLPHLRIGTMSPNQLYWRIEDSELPYKDTKTLGRRLIW  
RDLAYFQLHCFPSMKKKKIRSHYEAMEWVETIEEDRRFRWKTGTTGYPIVDAAMRELYATGWMQTQSIRMVAA  
SFLTEYLRLINWTKGAEFHHTLVADDSAINAMMWQNAGRSIDQWNFVLSPTTASQDPTGAYTRRWVPELAEL  
PTNRLVHCPWEATEDLLEE HGVVLGETYPHRIVVDLKKERKKSVENTLAVRRAAQDYNTDRGYDMIDL PNGQK  
SIVFTKKEYRIDRNGNVLPSNKSNGNRASNRMGNSRTGVVRHKKSSRNPKKAKTST

>Psilopogon\_haem\_NXG41087.1

SLEDLDNSLRKLNRLFVVRGQPTDVFPRFLFKEGWVTRLTFEYDSEPFGERDAAIVKLAKEAGVEVVIENSH  
TLYDLDRILIELNGHKPPLTYKRFQAIISRMDLPKKPVSTVISQQMETCKVDIQENHDDVYGVP SLEELGFPTD  
GLAPAVWQGGETEALARLDKHLERKAWVANYERPRMNANSLLASPTGLSPYLRFGLSCRLFFYRLWELYKKV  
KRNSTPPLSLYGQLLWREFFYTAATNNPKFDRMEGNPICIQIPWDRNPEALAKWAEGKTGFPWIDAIMTQLRQ  
EGWIHHLARHAVACFLTRGDLWISWESGVRVFDL LLDADFSVNAGSWMWLSCSAFAFFQFFHCYCPVGFGRRT  
DPSGDYVKRYLPKLKGFP SRYIYEPWNAPESVQKAAKCIIGVDYPKPMVNHAETSRLNIERMKQIYQQLSRYR

GLCLLASVPSCVEELSGPVTDSASGQGCSTSTAVRLSQADQASPKRKHEGAEEELCTEELYKRPKVTGLPSAEV  
PGKSL  
>Psilopogon\_haem\_\_NXG46235.1  
DNWAFLYAQRLALKQELPLRVCFCLVPKFLDATIRHYSFMLKGLQEVAKECAELNIPFHLLGYAKDVLPTFV  
VEHGVGGLVTDFCPLRLPRQWVEDVRERLPEDVPFAQVDAHNIIVPCWVASPKQEYSARTIRGKIHAQLPEFLT  
EFPPIIRHPYTSSCLAQPISEVVCYSSLQVDRTVKEVEWATPGTAAGLAVLQSFIAERLKSFGSHRNDPNKAA  
LSNLSPWFHFGQVSTQRAILEVQKHRGKYKESVDAFVEEAVVRRELAENFCYYNENYDSVQGAYDWAQTTLKL  
HIKDKRPFLYKLEELEHGTTHDPLWNAQLQMVQEGKMHGFLRMYWAKKILEWTRSPEEALQFAIYLNDRYEL  
DGRDPNGYVGCLWSICGIHDQGWPERAIFGKIRYMNYAGCKRKFDVGQFERRYAPRT  
>Psilopogon\_haem\_\_NXG51452.1  
KVDYDVCSSNYGNWLYSAGLGNDPRDNRKFNMIKQGLDYGNGDYVRLWLPELRGIKGADIHTPWVLSSADLSQ  
AGVTLGETYPQPVVTAPEWSRHVSQRPQGRSPHPRGRREPTRRPVQHRGIDFYFSSHKKDV  
>Psilopogon\_haem\_\_NXG53569.1  
MGVNAVHWFRKGLRLHDNPALRECIQGADTVRCVYIILDPWFAGSSNVGINRWRFLQCLELDANLRKLNSRL  
FVIRGQPADVFPRLFKEWNIAKLSIEYDSEFPFGKERDAAIKKLASEAGVEVIVRISHTLYDLDKIIELNNGGQP  
PLTYKRFQTLISRMEPLEMPVETITPEVMAKCTPVSDDHDEKYGVPSLEELGFDTDGLPSAVWPGGETEALT  
RLERHLERKAWVANFERPRMNANSLLASPTGLSPYLRFGCLSCRLFYFKLTDLYKKVKKNSSPPLSLYGQLLW  
REFFYTAATNNPRFDKMEGNPICVQIPWDKNPEALAKWAEGRGTFPWIDAIMTQLRQEGWIHHLARHAVACFL  
TRGDLWISWEEGMKVFEELLLDADWSVNAGSWMWLSCSSFFQOFFHCYCPVGFGRRTPNGDYIRRYLPVLRG  
FPAKYIYDPWNAPDSVQKAAKCIIGVNYPKPMVNHAEEASRLNIERMKQIYQQLSRYRGLGLLATVPSNPNGNG  
NGGLMSYSPGESISGCGSTGGAQLGTGDGHTSVQPCTLGESHTGASGIQQQGYCQASSILHYAHGDNQQPHLL  
QAGRTALGTGISAGKRPNPEEETQSVGPKVQRQSTN  
>Psophia\_crep\_\_NXI89661.1  
KVDYDVCSSNYGNWLYSAGIGNDPRDSRKFNMIKQGLDYGNGDYVRLWVPELRGIKGADIHTPWALNSAALSQ  
AGVTLSETYPQPVVTAPEWSRHISQRPQGRSHHPRGSRGPAHRPVRRRGIDFYFSRRKDV  
>Psophia\_crep\_\_NXI89928.1  
RFLQCLELDANLRKLNSRLFVIRGQPADVFPRLFKEWNIAKLSIEYDSEFPFGKERDAAIKKLASEAGVEVI  
VRISHTLYDLDKIIELNNGGQPPLTYKRFQTLISRMEPLEMPVETITPEVMEKCTTPVSDDHDEKYGVPSLEEL  
GFDTDGLPSAVWPGGETEALTRLERHLERKAWVANFERPRMNANSLLASPTGLSPYLRFGCLSCRLFYFKLTD  
LYKKVKKNSSPPLSLYGQLLWREFFYTAATNNPRFDKMEGNPICVQIPWDKNPEALAKWAEGRGTFPWIDAIM  
TQLRQEGWIHHLARHAVACFLTRGDLWISWEEGMKVFEELLLDADWSVNAGSWMWLSCSSFFQOFFHCYCPVG  
FGRRTPNGDYIRRYLPVLRGFPAKYIYDPWNAPESIQAACCIIGVNYPKPMVNHAEEASRLNIERMKQIYQQ  
LSRYRGLGLLATVPSNPNGNGNGGLMGYSPPGESISGCGSTGGAQLGPGDGHAVVQPCALGDSHTGASGIQQQG  
YCQASSILHYAHGDNQQSHFLQAGRTALGTGISAGKRPNPEEETQSVGPKVQRQSTN  
>Psophia\_crep\_\_NXI95798.1  
CIYILDPWFAASSAVGINRWRFLQSLLEDLNSLRKLNSRLFVVRGQPTDVFPRLFKEWGVTRLTFFEYDSEPF  
GKERDAAIVKLAKAEAGVEVVIENSHTLYDLDRILNGLHKPPLTYKRFQAIISRMELPKKPVSTVISQOMETC  
KVDIQENHDDVYGVPSLEELGFPTDGLAPAVWQGGETEALARLDKHLERKAWVANERPRMNANSLLASPTGL  
SPYLRFGCLSCRLFYRLWELYYKKVKRNSTPPLSLYGQLLWREFFYTAATNNPKFDRMEGNPICIQIPWDRNP  
EALAKWAEKGTGFPWIDAIMTQLRQEGWIHHLARHAVACFLTRGDLWISWESGVRVFDLLEDADFSVNAGSW  
MWLSCSAFFQOFFHCYCPVGFGRRTPSGDYVKRYLPKLKGFPSTRYIYEPWNAPESVQKAAKCIIGVDYPKPM  
VNHAETSRLNIERMKQIYQQLSRYRGLCLLASVPSCVEDLSGPVTESASGQGCSTSTVMRLSQADQVSPKRKH  
EGAEELCTEELYKRAKVTGLPAPEIPGKS  
>Psophia\_crep\_\_NXJ00149.1  
MPYRTIHLFRKGLRLHDNPILLAALESSEAIYPVYILDRKFMTSVTHIGALRWHFLLQSLLEDLQNLCLGSC  
LLVIQGEYESVLRDHIQKWNITQVTLDAAEMEPFYKEMEANIRCLGEELGFVLSLVGHSLYDTERILDLSGGT  
PPLTYKRFLHILSLLDGDEAPVRNLTAEDFQRCRSPDPSLAECYRVPLPVDLKIPLSPSPWRGGETEGLRRL  
EQHLTDQGWVTSFTKPTIPNSLLPSTTGLSPYFSMGCLSVRTFFYRLSNIYAQAKHSLPPVSLQGQLLWRE  
FFYTASATPNFTKMAGNPICLQISWYEDAERLHKWKTATGTFPWIDAIMTQLRQEGWIHHLARHAVACFLTR  
GDLWISWEEGMKVFEELLLDADYSINAGNWMWLSASAFFHQYTRIFCPVRFGKRTDPEGQYIRKYLPIKKNYP  
SKYIYEPWTASEEEQKQAGCIIIGQDYPPFMVNHKEASDHNQLMLKQVREEQYRTAQLTRDDTDPMEMKVVRD  
HSAENVSKGKVVRMT  
>Psophia\_crep\_\_NXJ02549.1  
DNWAFLYAQRLALKQGLPLRVCFCLAPKFLDATIRHYGFMLRGLQEVAEECAELNIPFHLLPGYAKDVLPAFV  
VEHGVGGLVTDFCPLRIPRQWVEGVRERLPEDVPFAQVDAHNIIVPCWVTSQKQEYSARTIRGKIHAQLPEFLT  
EFPPIIRHPYPPSCPAEPIAWEACYSSLQVDRTVKEVEWATPGTAAGLAVLQSFVTERLKSFGSHRNDPNKAA  
LSNLSPWFHFGQVSTQRAILEVQKHRGKYKESVDAFVEEAVVRRELAENFCYYNENYDSVQGAYDWAQTTLKL  
HAKDKRPFLYELQELEQGTTHDPLWNAQLQMVREGKMHGFLRMYWAKKILEWTRSPEEALRFAIYLNDRYEL  
DGRDPNGYVGKRLWSICGVHDQGWAERAIFGKIRYMNYAGCKRKFDVGQFERRYAP  
>Puccinia\_str\_KNE96768.1\_PSTG\_09905

MVKRAIQEEDDSKNLRASKRTNLAEEETPYKHLRLIEEGEEKQQPRKEAKDGVIVYWMRMRDLRLTDNRAL  
SLASQLAHSRNLHLVVLHILSTQDFKAHDRSPRRIDFVLRLNIDLKSRLRVLDIPLHTLTIHERHSIPDQIIQ  
ILKTNWASHLTANIEHEVDELRRDIQVLELAKKNQIQVRLVHDTCIVEPGKVLTKENKAYSVFGPWQRNWANL  
VNSNLDEYIGKSEDCPKNNACIKDIKTNLDFDSEVPASLPGFELSEQDSLVMNENWKAGEKAAEDLLNRFLN  
TKLEPEKKEIQTTLTGKASPPKKKEESTIVQEYSTLRNRPDLPGTSRLSAYLAAGVISPRACIRASMQIAEK  
KKAVNGLQVDRDLGVGVWQSEIGWRDFYQHVMAAWPRVSMGKAFNQKYEKMVWEFDDEIFQKWKDGLTGYPF  
IDACMRQLKHLGYMHNRRGRMCVAMFLT KDLMMDWRLGEKWF MENLV DGD LGSNNGGWQWSASTGTDPQPYFRI  
FAPLSQSEKSDPNGDFIRHWVPELKSLNAKQIHAPFDKLSIEKFKSLKYPKPIVDHSVVRKRALARYKNPGCA  
DNE

>Puccinia\_str\_KNF04081.1\_PSTG\_02786

MGVVGPRSLTIALFRNDLRIHDNPILTHSHLATVKEGDSRKNKVSDYVLPYVFDERQVELSGLDGYLRQGN  
PPRTEVCGFWRTGSHRLNFLCQSVYELKDQLKKKGSDDLIRFGVVESTTIKIIIEELQKEGFSVDHVYMAKEVA  
FEEVGTEKRLANLLAKLPQKVPLSLFHTRSLVHPNDLPFTINKTPDVYTPFRSKVESLPADKLCRPLPLPGK  
LQFPFPTLPDTISKASPEGYSGSLCEGDGCAEVFGRLVKPLLSNPDI PHDSKDV KGEYKADSRSAFPYKGGES  
EALRRLLDDYFFQGDQPLVRSYKTTRNGLLGQAYSTKFSFPFLALGCISPRKIIHSLWDHEAKFGANKDITYWVLF  
EILWRDYFIFISQKFGRTLFLIKGFEGKLDPKGATQKVSYWKPYPKDEKMNQGGQKGPPTTINKNAIAWLKGT  
GVPFIDANMIELRETGFMSNRGRQNVASFLAKDLELDWRIGAWEFSELLDYDPCSNYGNWQYVAGVGNDRPT  
SRQFNPIKQAKDYDAQGDYVKQWIPELKNFPTNRIHSPWLMNGQEWDKHLTGPSKGDNDPHKHIQKDYPRRPI  
LEQQAWKKHYQRR

>Puccinia\_str\_KNF06174.1\_PSTG\_00683

MSSKPIKLLYWFRDRLRLHDSPALIKALDLGPVEFYVWCWDPYVYNTPVGPNRWQFLLDSMNDLSKSICKI  
NERSKLLVIRGEPSITLPYIWSRWGITHLAFEEDDDNQHSRPRDESI IKA AKQAGLEVIPTPGHTLYNQEEVM  
TAAKGNLPASYRGFLTAIEKLGPPSPALDPPATLPDPGPTLDDPLPPEFLERWKKAWTDRQTEEKDVNKKNR  
TAEDQAYRSPYPLSGPAGKFEIPTIEELGIQTPTSHHRGGETVALQKLEEYLDKDEKVLKFEKPKTSPAQFDP  
PSTTTLSAHLKFGTLSARLFYERIKKLEADNP KIKISTPPESLIGQLLWRDFFHLQQSKI PN FHQIDGNRICR  
SLDWKLKDRNRDKNLDSEAESHLDASNGMTGFPWIDAIMRQLQTEGWIHHLARHSVACFLTRGHLYISWERG  
AEVFDLLIDWDPSLNAGNWMWLSASAYFSQYFRVYSPIAFGKKFDPNGDYIRHFCPELKDFPKQYIYQPWEA  
PISVQKKANCVIGERYPKPLVNEKEARESC LKQMKEGYQLNKY GIDSSSKPSTPHKSKTASPDKKGVNAATTS  
KRKLEKNSPGKIGSGSAKQLKLD FKPSTSSD

>Pundamilia\_nyer\_XP\_005722760.1

MSSSRTVICLLRNDLRLHDLNLFHWAQRNAEHIVPLYCFDPRHYVGTYNYSLPKTGPFRLRFLLESIRD LRNT  
LISKGSNLVVRGKPEEVVADLIRQLGSVSSVAFHEEVTSEELNVEKRVKDVCAQMKVKVHTCWGSTLYHRDD  
LPFFPHMSRLPDVYTQFRKAVESEGRVPRVFSTPEKLNPLPPGLEGAIPTAEDLQQTEAVIDPRSAFFPCSGGE  
SHALARLKHYFWDTD AVATYKETRNLGIGVDYSTKFSFWLAMGCISPRYIYHQIKQYEKERTANQSTYWVIFE  
LLWRDYFRFVSVKYGNRIFQVKGLQDKSVPWKKDMKLFDAWKEGRTGVPFVDANMRELAATGFMSNRGRQNV  
SFLT KD LGLDWRMGAWEFESLLIDHDVCSNYGNWLYSAGIGNDPREN RKFNMIKQGLDYDNNGDYVRQWVPEL  
QNIRGGDVHTPWLSNAALAHAVTLGDTYPAPIVMAPEWSRHINKKAGGTGPSPRGKKGPSHTPKQHRDRGI  
DFYFSRSKNL

>Pundamilia\_nyer\_XP\_005729928.1

MSVTFYSKMPPSGADAQATVKWWLGEVLEGREDPEGFFAMCVSILGHLETRSQFLSLIEPLSTGDRLLHTSLT  
SIYQEYFTKTEDDELELALALSLLDMKGHPLOSPSQESQPLHSGDAQNQRGSVQLNSILKPEGSNCTNQTGSW  
NRESPPQTAREMEFQISTYPNKQTLGTGTVCVSEQEGDQDQSQKPKRSKNRRQRKCTGQHLVGLPRSPSAP  
PPVLLWFRDRDLRLCDNPALVASLEVGA PVI PVFIWSPKEEEGTGITVAMGGACKYWLHQALLCFCSSLEHIGS  
RLVVLKASTESSLKALKELIKETGARTVL ANALYEPWLKERDDLVSALQKQGV ECRM FHSYCLRDPYSVTTE  
GVGLRGIGSVSHFMSCCRQNPGTAVGVPLDPPVSLPTPAHWPKGVCLDELGLARMPRRKDGT TVD WAVNIRKT  
WDFSEGGAQARLEAFLHDGVYRYEKESGRADAPNTSCLSPYLHFGQLSPRWLMWDAKGARCRPLKFQKRLAWR  
DLAYWQLTLFPDLPWESIRPPYKALRWSSDWGHLKAWQRGTGYPLVDAAMRQLWQTGWMNNYMRHVVASFLI  
AYLYLPWQEGYRWFQDTLVDADVAIDAMMWQNGGMCGLDHWNFVMPVDAAMTCDPYGT YVRKWCPELAELPD  
ELIHKPWKCPASMLRRAGVVFQGQSYPERIITDLEERRNQSLQDVALVRREFEQYVDKRSGCDLVPLPPRLVSE  
ALGLSHKDGAVVTQ GKQFLLPVITRMEFKHQHEDPDADATSNPYNVAVLKGYVSRKRDETI AFLNKRDF TASVM  
HEAVQRKERLNSDYRRMEGLPPSPSPRGRARRTPTAKDRFSIVPGGAVTSLK

>Pundamilia\_nyer\_XP\_005733435.1

MTHTCIHWFSKGLRLHDNPALMAALKDCKQLYPVFI LDPY LHNNACVGINRWRFLIGALKDLDGSLRKLNSRL  
FVVRGKPEDVLPKLF TKWKVTRLT YEYDTEPYS LQ RDSKVTSLAKERGVEVIYKVSHTLYNIERIIEENNGKP  
PLTYTKLQAI AKTIGPPKRPI PAPTMDMDKDKTPSENHEKEYGIPTLEELGLDTAPLGEDLFPGGEQEALR  
RLDEHMKR TKWCTFEKPQTS PNLSPSTTVLSPYVTFGCLSVRTFWWRLTEVYRG NKHS DPPVSLHGQLLWR  
EFFYTASLGIPSFNKMEGNSVCTQVDWDTNPDYLA AWREARTGYPFIDA IMTQLRQEGWIHHLARHAVACFLT  
RGDLWISWEEGQKVFEQLLLDGDWALNAGNWQWLSASTFFHQYFRVYSPVAFGKKTDKNGDYIRKYLPLLKKF  
PAEYIYEPWKAPRSIQQAAGCIVGKDYPHPIVQHEVISKKNIQRMKLAYAKRSPESPSKSGVKRKAPSIIEM  
IKKKAKVK

>Pundamilia\_nyer\_\_XP\_005747322.1

MVINTIHWFRKGLRLHDNP SLKESLLGADTVRCVYILD PWFAGSSNVGINRWRFL LQSLLEDLDSSLRKLNSRL  
FVIRGQPTDVF PRLFKWKITRLSYEYDSEPF GKERDAAIKKLASEAGVEVTVRISHTLYELD KIIELNGGQS  
PLTYKRFQTLISRMDPVEVPAESITAEIMGKCTT PLSEHDKEKFGVPSLEELGFDTEGLSSAVWPGGETEALT  
RLERHLERKAWVANFERPRMNANSL LASPTGLSPYLRFGCLSCRLFYFKLTDLYRKVKKNSSPPLSLYGQLLW  
REFFYTAATNNPCFDKMESNPICVQIPWDRNPEALAKWAEGR TGFPWIDAIMTQLRQEGWIHHLARHAVACFL  
TRGDLWISWEEGMKVFEELLLDADWSVNAGSWMWLSCSSFFQ QFFHCYCPVGFGRRTPNGDYIRRYLPILRG  
FPAKYIYDPWNAPEVVQKAAKCIIGVHYPKPMVHHAESRLNIERMKQIYQQLSCYRGLGLLATVPSGSNGNG  
NGNGNAEASSDSMRFSETSRDAAAPSTYQMPVHSQGDWQSGVM MYVQGDPQTSVGMHQHGPEHHPTTQTSGKR  
HSEDSGNSKSSKVQRQSIH

>Pundamilia\_nyer\_\_XP\_005747941.1

MVVNSVHWFRKCLRLHDNPALQEALNGADAVRCVYILD PFFAGAANVGINRWRFLLEALEDL DSSLKKLNSRL  
FVVRGQPTDVF PRLFKWNVTRLTFEYDPEPYGKERDGAIIKLAQEFGVETIVRNSHTLYNLDR IEMNNNSP  
PLTFKRFQTI VSRLELPRRPLPPITQQQMDKCHTKIEDNHDQLYSIPSLEELGFR TDGLPLAVWHGGESQALD  
RLGKHLDDKKVWVTSLEHSRVKTC SLYASPTGLSPYLRFGCLSCRVL YYNLRELYMKVRKRCTPPLSLFGQLLW  
REFFYTAATNNPNFDRMDGNPICVQIPWDQNPEALAKWAEGR TGFPWIDAIMTQLRQEGWIHHLARHAVACFL  
TRGDLWISWESGMKVFEEMLLDADWSVNAGSWMWLSCSAFFQ QFFHCYCPVGFGRRTDPTGDYIRHYIPVLKD  
YPNRYIYEPWNAPESLQKAANC VVGVDYPKPMINHAESSRLNIERMKQVYQQLSHYRGLSLLASVPTIQEEAE  
PPMTDESQTSSGPDSPQRPANTEEDVCYEAPDSSTVCPSS TSAPHPDQEQAPCISSVILIGNKEKRP

>Pundamilia\_nyer\_\_XP\_005752546.1

MLHCVWRSTSPFSAPGRFLKLLPHHHQRPSSPALFFLT SFFSCQPTMSGTKRKASSATAGKDHR AKQQKLAPV  
KQEKKEKVGWGLQSLVQQQRSEKKDVKFNKKRLRFLSDTEKIKQGSEGVLYWMLRDQ RVQDNWALIHAQRLAV  
KENLPLHVCFCFLVVPKSELSTLRHYSFMLKGLEEVAKECEQLNVQFHLLHGAPGKVLP GFVSDHSFGAVVTDF  
SPIREPLQWLEDVKKKLSKDIPFIQVDAHNIVPCWVASPKQEYSARTIRGKITNLLPEFLTDFPLVDSHPHTA  
TRTAKGVDWDKTLASLDVDRNVKEPEWAKPGTKAGMDMLESFIDVRLKLFGSQ RNDPNAPALSQ LSPWLRFGQ  
ISAQRVAWQVQRNGKNASQSVPAFIEELVVRRELTDNFCFYNKKYDSVEGAYEWAQKTLKD HAKDERPYLYTR  
EQLEKAKTHDKLWNAAQYQMVTEGKMHGFLRMYWAKKILEWTSSPEEALSIALYLNDRYELDGQDPNGFVGCM  
WSICGIHDQGAERAVFGKIRYMNYKGCLRKFNVAQFERKYCPKSL

>Pungitius\_pung\_\_XP\_037306365.1

MPTSACEDSKVLVRRMLVEVLMGREDPEGFFAMCVSVLGHRETSSQFLPLIRPLATANGSLHATLT SIHKEYF  
SKTQDDELELALSLSLVETNDHRLSGTSQESRPQPPADGANPPTS VSRGGIRSPQTGASVKASSPQTNHAPER  
HKITRIDKYETDKPGTSQTARVSGPVSKQDTFKEGDKMMDEALSPSEKPKRSKNRRQR RKGAGQQVVG LPRS  
PSARPPVLLWFRDLRLGDNPALTGSLLEVGA PVI PVFIWSPEEEEPGGITVAVGGACKYWLHQALSCFSASLE  
RIGSHLVFLEANRSSLHTLKE LVEETGAKTVLANALYEPWLKERDDVVESALRRDGVVCKMFHSYCLRDPYSV  
STEGVGLRGIGSVSHFRNCCRQNP GSALGAPLDSPASLPTPAHWPVGVSLDALGLARMPRRKDGT MIDWAANI  
RTSWDFSEEGASARLEAFLNDGVYRYEKESGRADAPNTSCLSPYLHFGQLSPRWLLWDAKGARCP PPKFQ RKL  
AWRDLAYWQLTLFPDLPWESLRPPYKALRWSSDRGHLKAWQRGRTGYPLVDAAMRQIWL TGWMNNYMRHVVAS  
FLIAYLYLPWQEGYRWFDTLVDADVAIDAMMWQNGGMCGLDHNFMHPVDAAMTCDPYGSYVRKWCPELAD  
LPDELIHKPWKCPPAMLRAGVVF GQTYAERIVTDLEERRSRSLRDVALVRKEFGQYVDKGS GCDLVPLP PRL  
VSQALGLAHRDAGLVTEGKRFLLPVITRMEFKHQQEDPDADAASNPNYAVLKG YVSRKRDETVAFLNERDFTA  
SVMHEGVQRRERLESNYRRIEGLPQPPAPRG TARRTPTAKDKFSVAPPR

>Pungitius\_pung\_\_XP\_037306498.1

MTVNSVHWFRKGLRLHDNPVLQEALDGADTVRCVYILD PWFAGAANVGINRWRFLLEALEDL DSSLKKLKSRL  
FVIRGQPTDVF PRLFKWEVTRLTFEYDPEPYGKERDGAIIKMAQEFGVETIVRNAHTLYNLDR IIEANNNSP  
PLTFKRFQAI VSRLELPRRPLPPINQQQMDRCRTNIADNHNQQYSIPSLKELGFRTEGLPPAVWQGGESEALD  
RLNKHLDKKVWVANFEHPRVNTCSLYASPTGLSPYLRFGCLSCRVL YYNLRELYMKLRKRCSPPLSLFGQLLW  
REFFYTAATNNPNFDRMEANPICVQIPWDQNPEALAKWAEGR TGFPWIDAIMTQLRQEGWIHHLARHAVACFL  
TRGDLWISWESGMKVFEELLLDADWSVNAGSWMWLSCSAFFQ QFFHCYCPVGFGRRTPSGDYIRRYIPMLKD  
YPNRYIYEPWNAPEVQKAANC VVGVDYPKPMINHTEGSRLNIERMKQVYQQLSHYRGLSLLASVPTIQEEAE  
PPMTDESLTGSGPDSPPKGPADWEAAGCSIAPHLSTLYPSSTFAPYPDLEGAENIHPSQTL SGSPGSHTPSSV  
AAAMSTWAPPSSLASSTMSLSLSSSKSSSTCPNVSPSTQ PSSLGQRRKGLTRKVRDRQRQRGRKEEVRRAEIA  
GREERMEEDVEQQEEKMEEATFEEISGHQQ

>Pungitius\_pung\_\_XP\_037307515.1

MAHTCVHWFRKGLRLHDNPALMAALRDCKELYPVFI VDPHLHNNTCVGINRWRFLVGALKDLD CSLRRLNSRL  
FVVRGKPEEVPELFDRWKVTKLTYEYDTEPYSLSRDKAVATLAKEHGVEVIYKISHTLYDTER IIEENSGKA  
PLTYNRMQAI VKTGLGPPKRPI PAPTIEDLPDAMTPCSETHETKYEIP TLEELGQDTAALGGEKFP GGQEAL K  
RLDEHMKRTGWVCGFEKPQTS PNLSPSTTVLSPYVTFGCLSARTFWWRLADVYQ GKHSNPPVSLHGQLLWR  
EFFYTASVGIDNFNKMEGNPVCTQVDWDTNPEYLA AWREARTGFPFIDAIMTQLRQEGWIHHLARHAVACFLT  
RGDLWISWEEGQKVFEELLLDGDWALNAGNWQWLSASAFFHQYFRVYSPVAFGKKT DKNGDYIKKYLP LLKKF

PAEYIYEPWKAPRSVQQAAGCIVGNDYPQPIVKHEVISKKNIQRMKLAYAKRSGDPAESPIKKQGIKRKAPSV  
VDMLKKKDRRK

>Pungitius\_pung\_\_XP\_037307927.1

MVVNTIHWFRKGLRLHDNPSLRDSIRDADSLRCVYILDWPWFAGSSNVGINRWRFLQCLEDLASLRKLNSRL  
FVIRGQPTDVFPRLFKEWQTSRLSYEYDSEPFQKERDAAIQKLASEAGVEVMVRTAHTLYNLDKIIELNDGQS  
PLTYKRFQALVNRMDAVELPAETITSEVIKKCATPLSKDHDDKFAVPSLEELGFETEGLTTAVWPGGETEALM  
RLERHLERKAWVANFERPRMNANSLASPTGLSPYLRFGCLSCRLFYFKLTDLYRKVKKNSTPPLSLYGQLLW  
REFFYTATNNPCFDKMEGNPVCVQIPWDRNPEALAKWAEGRGTGFPWIDAIMTQLRQEGWIHHLARHAVACFL  
TRGDLWVSWEEGMKVFEELLIDADWSVNAGSMMWLSCSSFFQQFFHCYCPVGFGRRTDPNGDFIRRYLPVLRG  
FPAKYIYDPWNAPEEVQKAAKCIVGVHYPRPMVNHAESSRVNIERMKQIYQQLSSYRGLGLLATVPANPNSVA  
NDGIFGVVNSGASRGPGGSSEGLSTHAASSFQTERGNSTQKRRREEDISLQSSAKSWRQSN

>Pungitius\_pung\_\_XP\_037311500.1

MSTSRTIICLLRNDLRLHDNEPFWAQRNAEYIVPLYCFDPRHYVGTYNYNLPKTGPFRLLHFLLEGVKDLRNT  
MLSKGSNLVVRGKPEEVVADLIKQLGSVSTVAFHEEVTSEELNVEKRVKDVCAARMKVKVHTCWGSTLYHRDD  
VPFHHISRLPDVYTQFRKAVETQSRVRPLFPAPEQLKPLPEGLEGAIPTAEDLEQTGPVTDPRSAPPCSGGE  
SQALARLKHFWDTDAVATYKETRNLIGMDYSTKFAPWLMGCISPRYIYHQIQQYEKERTANQSTYWVIFE  
LLWRDYFKFVAVKYGNRLFQIKGLQEKSVPWKKDMTLFNAWKEGRTGVPFVDANMRELAMTGFMNSNRGRQNV  
SFLTKDLGLDWRMGAELEFYLLIDHDVCSNYGNWLYSAGIGNDPRENKRFNMKQGLDYDNGDYVRRWVPEL  
QGIRGADVHAPWTLSTAALLHAGVSLGETYPTPIVMAPEWSRVHNKKPSGAGSPRGRKGPSHTPKQHGDRI  
DFYFSRSKNL

>Pungitius\_pung\_\_XP\_037313207.1

MLLVWCRSATLSSDARRLLGLVVRSDRRPTSPLSLLSQSLPCQAVMSARKRKATSAAAEPQAKQKKEEEGEK  
NDERAAGWLKDLLKQLRKENKDMKFNKKRLRFISDTESIKQGSQGVLYWMLRDHRVQDNWAMVHAQQLALKEN  
LPLHVCVCLLPQSELSTLRHYSFMLKGLEEVAKECKALDIQFHLHGSFGDVLADFVAEHSLGAVVTDFSPL  
REPLRWLEEVCATLPNEIPLIQVDAHNIVPCWVTSPKLEYAARTIRGKITKLLPEFLTEFPLVEKHCCTATTT  
AKPVDWDKKLASLQVDRAVGDEWARPGTGGGLAMLESFIDVRLKLFDTKRNDPNSAALSQLSPIWIRFGHLSA  
QRVATQVQSSGKSAGHSVASFIEELVVRRELTDFNCFYNEKYDSIKGAYEWAQKTLKDHAQKRPYLYTREQL  
EEAKTHDKLWNGAQYQMVTEGKMHGFLRMWAKKILEWTSSPEEALSIALYLNDRFSLDGQDPNGFVGCMMWSI  
CGIHDQGWKEREVEFGKIRYMNKYGCLRKFDDVAAFERKYRPNH

>Pygocentrus\_natt\_\_XP\_017540798.1

MPHRTLHLFRKGLRLHDNPTLLGALESSSVVFLVYVLDRAFEEMRVGFLQWRFLQSLDLLRGRLSAVGSR  
LYVLQGSRAVLRELVRWRITQISFDLETEPHHVALQRELGEMAQELGLTVHTCVAHTLYDPRRIIDANGGE  
APLTYKKFLRVSVIGEPDKPVRDITAEDFQRCYSPEEVECEQHCIPLSELGLDGSDEAQAQAEVLWPGGETHA  
LQRLHKHLESQGWVQNSKQPQAVPNSLWPNNTGLSPYFSFGCLSVRTFYHTLSRVYARARNHALPPVALQGV  
WREFFYTAAHTPNFTRMEGNPICLQIRWNHDPDALQKWRTAQGTGFPWIDAIMTQLRQEGWIHHLARHAVACF  
LTRGDLWISWEEGMKVFEELLLDADYSVNAGNWLWLSASAFFHQYNRIFCPVRFGRRTPDEGRYIRKYVPVLK  
NFPSPFIYEPWSAPEEVQLQAGCIIIGEDYFFPMVCHAEASERNLALMKEARSCQENTAKLTRDVAEEPVDVRV  
KRELGEEDQPSKRFSSDPQSRPCSWSGQENPRLPEITGQAM

>Pygocentrus\_natt\_\_XP\_017545666.2

MVVNTVHWFRKGLRLHDNPSLRDSIAGADTLRCVYILDWPWFAGSSNVGINRWRFLQCLEDLASLRKLNSRL  
FVIRGQPTDVFPRLFKEWKITRLSYEYDSEPFQKERDAAIKKLASEAGVEVTVRISHTLYDLKIIELNGGQS  
PLTYKRFQTLISKMDAVEMPAETITAEIMGRCATPISDDHDEKFGVPSLEELGFETEGLSSAVWPGGETEALT  
RLERHLERKAWVANFERPRMNANSLASPTGLSPYLRFGCLSCRLFYFKLTDLYRKVKKNSTPPLSLYGQLLW  
REFFYTAAATNNPRFDKMEGNPICVQIPWDRNPEALAKWAEGRGTGFPWIDAIMTQLRQEGWIHHLARHAIACFL  
TRGDLWISWEEGMKVFEELLLDADWSVNAGSMMWLSCSSFFQQFFHCYCPVGFGRRTDPNGDYIRRYLPILRG  
FPAKYIYDPWNAPEGVQKLAKCIIIGVHYPKPMVNHAESRNINIERMKQIYQQLSCYRGLGLLATVPNSNGNG  
DGAGAGPGDSTQESNAAVHLTPANPREDLSASTFSCSHSDQQPGISVQPQTSFSGAGRVGSHREDSKQTLRGR  
GTFHMKRHSEEPASSNGCKIQRQNSN

>Pygocentrus\_natt\_\_XP\_017554325.1

MVVNSVHWFRKGLRLHDNPALQEALNGADTVRCVYILDWPWFAGSANVGVRWRFLLESLEDLDTCLRKLNSRL  
FVVRGQPADVFPRLFKEWNVTRLTFEYDPEPYGKDRDGAIKISQEFVETIVRNSHTLYSPDRIEMNSNSP  
PLTFKRFQAIVNRLELPPKPLPTITQEQMASCRTQIADNHDEHYSVPSLEELGFKSQPDVTPVWKGGETEAL  
RLNKHLDRAKAWVASFERPRINAHSLFANPTGLSPYLCFGCLSSRVFYHLRELYMKLRKSSPPLSLFGQLLW  
REFFYTAAATNNPNFDRMEGNPICVQIPWDHNPEALAKWAEGRGTGFPWIDAIMTQLRQEGWIHHLARHAVACFL  
TRGDLWISWESGTVFEELLLDADWSVNAGSMMWLSCSAFFFQQFFHCYCPVGFGRRTDPNGDYIRRYIPKLK  
YPNRYIYEPWNAPEVQKAAANCVVGVDPKPMINHAESSRLNIERMKQVYQQLSHYRGLSLLASVPTIQEEAE  
PPLSDDSQASSSGVPSSSTQTQSQQTQTQPPQPPDPQLPATASVPPAQRKRGRTPEHRTSLNPKVQHTSQ  
AKASEQPPQTTNKQ

>Pygocentrus\_natt\_\_XP\_017573179.1

MKAPLCETAELLPQVSKRWSPLKMASSRTVVCLLRNDLRLHDNEVFNWAQRNAEHIVPLYCFDPRQYLGTHHF  
NFPKTGPFRLRFILDSVKDLRDILKKKGSNLIVRCGKPEEVVSDLIKQLGSSVSAVAFHEEVASEEKRVMKV  
HVCSQNKVKVQTFWGSTLYHRDDLPCFHIGGLPDVYTAFRKAVEAQSRVRPVLPLAEHIRPLPLGLEEGPIPT  
FDDLEQREPLDDTRSAFPCRGGESEALARLKHFWETNAVAAYKETRNGLIGVDCSTKLAPWLAVGCISPRYI  
YEQLKKYEAERTANQSTYVWVFELLWRDYFRFVALKYGDRI FHLNGLQDKHVPWKTDMELFNAWKEGRTGVPF  
VDANMRELFLTGFMSNRGRQNVASFLT KDLGLDWRLGAEWFEYLLVDYDVCSNYGNWLYSAGVGNDPRENKRF  
NMIKQALDYDSNGDYVRQWVPELKGIMGGDVHTPWALSSASLSRAQVALDETYPSPIVKAPEWSRHINMKPSG  
AGSSRGKKGPSHTPRQHRDRGIDFYFSKSKNL

>Pygocentrus\_natt\_\_XP\_037391061.1

MLCVQRCASAGRRAGNLTTSAAASPPSLELRAALLTFLHRRRAASMSARRAELKRKAELGSAEAGKKRKAEEESG  
GERGGERGGERGGERAERGERQAGWLQLEVAELRARNAAACKFNTKRVRFLSENQKVPQCGGVLYWMARDQRV  
QDNWAVVYAQQALALAEKLPLHICFCLVPRYLDAAAYRQYAFMIRGLRKVAKECKSLDIQFHLLQGEPERTLPGF  
VKSWNIGAVVMDFNPLRLPLQWTEKVKQLPADIPFMQVDAHNVPWCWEASPKLEYGARTIRGKITKLLPEFL  
TEFPFVDIHPHSSTKTAKAVDWDEVLSSEVDRTVGEVEWAQPGAAEGMAMLESFIQHRLRLFATKRNNPNSA  
ALSQSLPWLHSGQLSAQRVVKEVQRWGNKARESVTSFTEELVVRRELADNFCFYKNKYDSIDGAYDWAKKTLK  
DHAKDKRPYLYTQEQLNARTHDQLWNAAQRQLLLEGKMHGFMRYWAKKILEWTSSPEEALAIAYVNLNDHYA  
LDGCDPNGYVGCMSICGIHDQGWAERPVGKVRMYNYDGCKRKFDVVGQFERRYAVKKA

>Pygocentrus\_natt\_\_XP\_037403264.1

MIFWQSMKHKCIHWFRKGLRLHDNPALKAAALHDCEHIYPIFILDWPFPKNAQVGINRWRFLVEALKDLDSSLK  
KLKSRLFVVRGVPRDVFPKLFKEWKVTRLTFEVDTEPYSQIRDKEVMDLAKQHGVVITKISHTLYNIERIE  
ENNGKPLTYVRFTVVKAIPTPKRPVPAPTREDMKGILTPSSDKHDENYGIPTLKELGQDSSTLGPDLYPGG  
EQESLRRLEEYMQRTGWVCSFEKPQTSNALSPSTTVLSPYVKFGCLSARTFWWGLAEVYQGRKHSAPPVSLH  
GQLLWREFFYTAAGVIPNFSKMEGNPNCVQVDWDSNPEHLAAWKEARTGFPFIDAIMTQLRQEGWIHHLARHA  
VACFLTRGDLWISWEEGQKVFEELLLDADWSLNAGNWQWLSASAFFHQYFRVYSPIAFGKKTDKNGDYIKKFL  
PVLKKFPPEYIYEPWKAPKSVQQQAGCIVGKDYPRPIVDHDVVSKRNIQRMKAAYAKRHGDPSSSQTESKGQK  
RKSASIKEMFTKKAKK

>Pygoscelis\_papu\_\_KAF1442024.1

MPHRTIHLFRKGLRLHDNPULLAALESSEVVYPVYILDRKFMTSMHIGDLRWHFLLQSLEDLQKNLCQLGSC  
LLVIQGEYESVLRGHIQKWNITQVTLDAMEPFYKEMEASIRRLGEELGFVLSLVGHSLYDTRILDLNSGT  
PPLTYKRFLHILSLLDPEVPVRNLTAEDFQRCRPPDPGLAECYRVPLPVDLKISLESLSPWRRGETEGLQRL  
EQHLTDQGWVASFTKPRITPNSLLPSTTGLSPYFSMGCLSVRTFFYRLSNIYAQTKHSLPPVSLQGQLLWRE  
FFYTVVSATPNFTKMAGNPICLQINWREDAERLHKWKAQTGF PWIDAIMTQLRQEGWIHHLARHAVACFLTR  
GDLWISWEEGMKVFEELLLDADYSINAGNWMWLSASAFFHQYTRIFCPVRFGRRTDPEGQYLRKYLPI LKNFP  
SKYIYEPWTASEEEQKQAGCIIGQDYPFPMVNHKEASDHNLLQLMKQVREEQYRTAQLTR

>Pygoscelis\_papu\_\_KAF1442728.1

WFASENKCFFTISSRFLQLCLEDLDANLRKLNLSRLFVIRGQPADVFPRFLFKEWNIAKLSIEYDSEPFGERDA  
AIKKLASEAGVEVIVRISHTLYDLDKIIELNGGQPLTYKRFQTLISRMEPLEMPVETITPEVMEKCTTPVSD  
DHDEKYGVPSLEELGFDTDGLPSAVWPGGETEALTRLERHLERKAWVANFERPRMNANSLLASPTGLSPYLRF  
GCLSCRLFYFKLTDLYKKVKKNSSPPLSLYGQLLWREFFYTAATNNPRFDKMEGNPICVQIPWDKNPEALAKW  
AEGRTGFPWIDAIMTQLRQEGWIHHLARHAVACFLTRGDLWISWEEGMKVFEELLLDADWSVNAGSWMWLSCS  
SFFQQFFHCYCPVGFRRTDPNGDYIRRYLPVLRGFPKAYIYDPWNAPESVQKAAKCIIGVNYPKPMVNHAEA  
SRLNIERMKQIYQQLSRYRGLGLLATVPSNPNGNGGMLGYSPGESISGCGSTGGHLFPASPGAQLGTGDGH  
TVVQPCALGDSHIGASGIQQQGYCQASSILHYAHGDNQQSHLLQAGRTALGTGISAGKRPNPEEETQSVGPKV  
QRQSTN

>Pygoscelis\_papu\_\_KAF1450427.1

RFLQLSLEDLDNLSRLKLNLSRLFVVRGQPTDVFPRLFKEWGVTRLTFEYDSEPFGERDAAIVKLAKEAGVEVV  
IENSHTLYDLDRIIELNGHKPPLTYKRFQAIISRMELPKKPVSTVMSQQMETCKVDIQENHDDVYGVPSSLEEL  
GFPTDGLAPAVWQGETEALARLDKHLERKAWVANYERPRMNANSLLASPTGLSPYLRFGLSCRLFYRLWE  
LYKKVKRNSMPPLSLYGQLLWREFFYTAATNNPKFDRMEGNPICIQIPWDKNPEALAKWAEKGTGFPWIDAIM  
TQLRQEGWIHHLARHAVACFLTRGDLWISWESGVRVFDLLEDADFSVNAGSWMWLSCSAFFQQFFHCYCPVG  
FGRRTDPGSDYVKRYLPKLKGFPSRYIYEPWNAPESVQKAAKCIIGVDYKPMVNHAETSRLNIERMKQIYQQ  
LSRYRGLCLLASVPSCVEDLSGPVADSASGQGCSTGTAVRLSQADQASPKRKHEGAEEELCTEELYKRAKVTCL  
PAPEIPGKSL

>Pygoscelis\_papu\_\_KAF1670776.1

DNWAFLYAQRLALKQELPLHVCFLVPKFLDATIRHYGFMLKGLQEVAEECAELNIPFHLLLGAKDVLPTFV  
VEHGVGGLVTDFCPLHLPRQWVEDVRERLPEDVPFAQVDAHNIVPCWVASPKQEYSARTIRGKIHAQLPEFLT  
EFFPIICHYPSPSCPAEPIAWEACYSSLQVDRTVKEVEWATPGTAAGLAVLQSFIAERLKSFGSHRNDPNKAA  
LSNLSPWFHFGQVSTQRAILEVQKHGKYKESVDAFVEEAVVRRELAENFCYNNENYNSVQGAYNWAQTTLKL  
HAKDKRPFLYELQELEQGTTHDPLWNAAQLQMVQEGKMHGFLRMWAKKILEWTRSPEEALQFAIYLNDRYEL

DGRDPNGYVGKLQDGGAGWRVFDGQGCSCLSICGIHDQGWAERAIFGKIRYMNYAGCKRKFDVGQFERRYAP  
H  
>Pygoscelis\_papu\_\_KAF1675079.1  
KVDYDVCSNYGNWLYSAGIGNDPRDNRKFNMIKQGLDYDRNGDYVRLWVPPELQGIKGADIHTPWALNSAALSQ  
AGVALGETYPQPVVTAPEWSRHINQRPQGRSPHPRGRRGPAPPPMRHKDRGMDFYFSREKDV  
>Pyrrhocoris\_apt\_cpd\_photolyase\_MW662130  
MAPPVKKLKTENTPAFDAFLNSIEADRTKVGPSILEFSFNKKRARVLSKAKDLPEWAEGIMYWMTREERIQD  
NWSLLYAQRLAMKSKLPLHIYFCLRKTFMNAPIRHFKFLLKGLEEVANESSEKLTIPFHMVISNEEGSNTVLDF  
VMENKIGCVVIDFSPLRIGRSWAEKLKEALPEDLPLVEVDGHNIVPCWIASDKLEYGARTIRNKINSKLNDFL  
TPFFPVIKHPYSGKLKSKEIDWQVAEASLEVDRSDVSVSWAKPGYINGIKMLYEFCDNRLKKFKDKRNDPLGN  
AISNLSPPWFHFGQISVQRAILTVKSFKSANKESVECFCEEAIVRRELADNFCYYNPNDKLEGAYDWAKKTLN  
DHRKDKREWLYTQEELEKSLTHDDLWNSAQIQLVTEGKMHGFLRMWAKKILEWTESPEEALAITIYLNDRYS  
LDGRDPNGFVGCMMWSICGIHDQGWKERQVFGKIRYMNYAGCKRKFDVEAFVSRYGGKVVKKKR  
>Pyrrhocoris\_apt\_cry-m\_MW662132  
MAEKHTVHWFRKGLRLHDNPSLRHGLKGAKTFRCIFILDPFANASNVGINKWRFLQCLEDLDRSLMKLNSR  
LFVIKGGPADILPKLLKEWGTTCLTFEEDPEPFGRVRDQNIAMCKGMNITVISHVAHTLYKLERIIEKNGGK  
APLTYHQFQSVIARMEDPPIPDSPVTSIIIGEAVSPISDDHDDKYGVPTLEELGFDVEGLLPGVWPGGESEAL  
SRLEHRLERKAWVASFGKPKMTPQSLLPSQTGLSPYLRFGLCLSTRLFYYQLNDLYRKIKKAIPPLSLHGQVLW  
REFFYCAATKNPNFDRMIGNPICVQVPWDKNPEALAKWANGQTGFPPWIDAIMTQLREEGWIIHHLARHAVACFL  
TRGNLWISWEEGMKVFEELLLDADWSVNAGMWMWLSCSSFFQQFFHCYCPVRFGRKADPNGDYIRKYLPIILKN  
FPTKYIHEPWNCPATVQKASKCIIIGTDYPLPMLNHSLSVKHNIERMKQVYLQLMKFRQPGISLSLNSSESSTER  
TKKTEESIYEENIFAPPASTFRGSLNKK  
>Pythium\_oli\_TMW55947.1\_Poli38472\_  
MRRVLEASSGLRLPNGFHMERVQWLYDGLATSLTVPRPTSESFDRPPPKHLVYWMQTSVRSKYNYSLEYAIA  
VANALSLPLHVYFLSDRSVVPSPYQPRDPNFAFGFATERHAKFGLGLEGLACVQKKLAKRGLSFEVFHHRHVVP  
SDKPIEFWTDVDEASEEDPPSTLKPSRSMLLDRCARNAAAVITDRPYLRPWREALAQCVSDAKAQRREWGVVQ  
VEGDVVVPCESASYKEEYAARTIRPKIQAQLKKFLVELDHQEVKEECKTVGKSIVTSAFQDDTVLVLVDVTD  
DKALQLLDVDRTVRGVSCFLGGEDVAVETGKTFLEKKLVRYATDRNEPSGDGGSNLSIYLRIGHISPVRIALN  
AQKVNAKEGKDSFLEELIVRELSVNMGVFNASYDTMACLPDYAAKTLDHAGDKREHLYTVEQLEAAKTFD  
VYWNAAQLEMVYTAMHGYMRMYWAKKVLEWTKTPELGFRIGLYLNNKYALDAPDPNSYTGIAWSFGKHDQGW  
KERPIFGKVRYMNESGLKRKFRMDAYVNKVKKLQSGDKDSNAGILDLPKQIKSPAKPRKTKKLVEDEGDSFVS  
ASSPTPKKRKTLDNFFSKK  
>Pythium\_oli\_TMW57503.1\_Poli38472\_  
MEEPNEALLALASLPLADESDRRVQSSVVPSELVDVEVEAAQAVNAQVPPSPQLSTHRTMRGLVWFRDLRIH  
DNHALHAALQHVPKGMTLIPLYIIHRPKVMCLCGVNRQFLIESVSSLSEAI AERGSRLIIARGDSVEVLKRVL  
PAWDITHLFFDNVTEPFPIERDNRVRTVADALNIKVETTNGCTLYDLDAVIEKHSGRAPKTYTSFLRTISTFP  
IPSKPLDTPQELPPPMCLPSELYQQIVDHWSAIAQDDAEIQKQVEIIAGPEQSFTIPEVTEFGYETPARHSFI  
YGGERIALNILSEYCKNEGRVVKFEKPKTSPAETRPSSSTTSLSPYLYFGCISPRLFYHRVREIQERHQASS  
APPVSLDGQLLWREFFHFCNGHANPFLDKMEENPICLOIDWRWHTIPEREEDMTEDDKLAKAQFEAWTEGQTGY  
PWIDAIMIQLKEEGWMHHLARHSVACFLTRGDLYISWVRGLEVFQERLIDHDWCINGGNLWLSASAFFSAYF  
RVYSPSTFGKKWDPEGKFIRKYIPQLRNMPTKYIYEPWKSPTVQRAAGCLIGKDYPPFIVDHKIAQQKCMAG  
MKQSYAMRRYGVSPLESLGSPRAKRPREDSDTSDDASMY  
>Python\_bivittatus\_XP\_007436636.1\_cryptochro  
MAALSGLVPRPRSGGCSVHWFRRLRLHDNPALQAALREATSVRCIYILDPFWAASSAVGINRWRFLQSLD  
LDNSLRKLNLSRLFVVRGQPTDVFPRLFKEGWVTHLTFEYDSEPFGKERDAAIVKLAKEAGVEVTTENSHTLYD  
LDRIIDLNGHKPPLTYKRFQAIISRMDLPKPKVSTVTSQQMEMCKTEIQENHDDTYGVPSLEELGFPTTEGLAP  
AVWQGGETEALTRLDKHLERKAWVANYERPRMNANSLASPTGLSPYLRFGLCLSCRLFYRLWELYKKVKRNS  
TPPLSLYGQLLWREFFYTAATNNPKFDRMEGNPICIQIPWDRNPEALAKWAEKGKTGFPPWIDAIMTQLRQEGWI  
HHLARHAVACFLTRGDLWISWESGVRVFDLLELLDADFVNAGSWMWLSCSAFFFQQFFHCYCPVGFGRRTDPSG  
DYIRRYLPQLKGFPSTRYIYEPWNAPESVQKAAKCIIGIDYKPMVNHAETSRLNIERMKQIYQQLSRYRGLCL  
LASVPSCIEDFSNLTTDFSSAHGSYSSTTLRQSHCGQTSPPKRKCDAEADHSEELHKKRARIMALQISKNPQQEL  
LPPEIGN  
>Python\_bivittat\_XP\_007441920.2  
MTLHPCILLADNWAFLYAQRLALKQRLPLHVCFLVPKFLDATIRHFGFMLRGLLEEVAEECRTLDIPFHLLIG  
YAKDTLPPFVAQRGIGGVVTDSPRLRLPMKWIQEVLEQLPSDVPFAQVDAHNIIVPCWVASDKQEYGARTIRK  
IHDQLAEFLTEFPVIKHPFPVGLQEEPISWDACYSSLQVDCSVKEVDWAKPGAASGLKVLEEFVKERLKHFA  
SGRNNPNQAALSNSPWFRRFGQVAVQRAILEVYKHRTRYKESVEGFIEEAVVRRELADNFCFYNPNDKIEGA  
YDWAKTTLKIHAADKRPPLYTLKQLEEGKTHDPLWNAQQLQMVQDGKMHGFLRMWAKKILEWTRSPPEALQF  
SIYLNDRYELDGRDPNGYVGCMWSICGIHDQGWAERAVFGKIRYMNYAGCKRKFDVGQFERKYGAHSFTQ  
>Python\_biv\_XP\_007432430.1\_cry-1\_X1

MGVNSVHWFRKGLRLHDNPALREVIQGADTVRCVYILDPWFAGSSNVGINRWRFLQCLELDANLRKLNSRL  
FVIRGQPADVFPRLFKAWNISKLSIEYDSEFPFGKERDAAIKKLATEAGLEVIVRISHTLYDLDKIIELNGGQP  
PLTYKRQTLISRMEPLEMPVETITAEVMSKCTTPVSDDHDEKYGVPSLEELGFDTDGLPSAVWPGGETEALT  
RLERHLERKAWVANFERPRMNANSLASPTGLSPYLRFGCLSCRLFYFKLTDLYKKVKKNSSPPLSLYGQLLW  
REFFYTAATNNPRFDKMEGNPICVQIPWDKNPEALAKWAEGRGTGFPWIDAIMTQLRQEGWIHHLARHAVACFL  
TRGDLWISWEEGMKVFEELLLDADWSVNAGSWMWLSCSSFFQQFFHCYCPVGFGRRTDPNGDYIRRYLPILRG  
FPAKYIYDPWNAPEGVQKAAKCIIGINYPKPMVNHAESRLNIERMKQIYQQLSRYRGLGLLASVPSNNGNG  
NNGNGNGGLMGYSPGENLPGCAGAGAGGAQMGTSSEGTGNVQACTLGETHTGTSGIQQQGYSQGNNGILHYA  
HGDSQKTLLMQQGRTSLSVGCTGKRPNPEEGIQSIGPKVQRQSSN

>Ramazzottius\_var\_GAU94194.1\_RvY\_06016

MNKISGLLLRRRLLPDHLRRASKSATRTMPPLSKKFKKEDGEPSSSESIADVSSSTADQPETTQTIDGVVSDIF  
LPSANPLYEPPTLTSEQKKFINKINQSRKNWGSPPMFPYRMERVRPIIPATSPQPISPGQCVLWMSRDTRVQ  
DNWAFIHAQRMALQARVPLLACFCLVPKYLGAPLRHFQFLLGGLVEVQKECSQLNIPFHMLIGFAKDVLPQFL  
KDKNVGLLVNDFSPLKGPMSWMNEAKERMDGTVAWDQVDAHNIVPCWTASDKEEYGARTLSKIHKVKDRYLT  
PFFPAIVKHPYSMIEEMPQIDWVACEASLEVDRSIGAVDWAKAGTSHSLVTLHSFITKRLPNYGRNDPNVPAL  
SQLSPWFHYGQISVARAILETEQAAKDKPSLRAGFDTFEEAVIRRELSDNFCFYNSNYDNIDGAKPWAKQTL  
LAHMKDKRPILYTFKELEECCRTADDLWNAQMOMNREGKCHGFMRMYWAKKILEWTENPQQALESFIKLNNDKY  
SLDGRDPNGYVGCWMSICGTHDQGWAEVFGKIRYMNYNGCKRKFDVAGFVSKYSKYFPKPVAVKVY

>Ramphastos\_sulf\_NXP71433.1

DNWAFLYAQRALAKQQLPLHVCFCCLVPKFLDATIRHYSFMLKGLQEVAKECAELNIPFHLLGYAKDVLPTFV  
VEHGVGGLVTDFCPLRLPRQWVEDVRERLPEDVPFAQVDAHNIVPCWVASPKQEYSARTIRSKIHAQLPEFLT  
EFPPIIHHPYTSSCLAQPIAWECYSSQLQVDHTVKEVEWATPGTAAGLAVLQSFIAERLKFFGSHRNDPNKAA  
LSNLSPWFHFGQVSTQRAILEVQKHSKYKESVDVFVEEAVRRELAENFCYNNENYDSMQGSAYDWAQTTLK  
LHIKDKRPFLYKLEELEHGTTHDPLWNTAQLQMVREGKMHGFLRMYWAKKILEWTHSPEEALQFAIYLNDRYE  
LDGRDPNGYVGLWSICGIHDQGWPERAIFGKIRYMNYAGCKRKFDVVGQFERRYAPCT

>Ramphastos\_sulf\_NXP71993.1

MGVNAVHWFRKGLRLHDNPALRECIQGADTVRCVYILDPWFAGSSNVGINRWRFLQCLELDANLRKLNSRL  
FVIRGQPADVFPRLFKAWNIAKLSIEYDSEFPFGKERDAAIKKLASEAGVEVIVRISHTLYDLDKIIELNGGQP  
PLTYKRQTLISRMEPLEMPVETITPEVMAKCTTPVSDDHDEKYGVPSLEELGFDTDGLPSAVWPGGETEALT  
RLERHLERKAWVANFERPRMNANSLASPTGLSPYLRFGCLSCRLFYFKLTDLYKKVKKNSSPPLSLYGQLLW  
REFFYTAATNNPRFDKMEGNPICVQIPWDKNPEALAKWAEGRGTGFPWIDAIMTQLRQEGWIHHLARHAVACFL  
TRGDLWISWEEGMKVFEELLLDADWSVNAGSWMWLSCSSFFQQFFHCYCPVGFGRRTDPNGDYIRRYLPVLRG  
FPAKYIYDPWNAPEVQKAAKCIIGVNYPKPMVNHAESRLNIERMKQIYQQLSRYRGLGLLATVPSNPNGNG  
NGGLMSYSPGESISGCVMSLFSASPGAQLGTGDGHTGVQPCALGDSHTGASGIQQQGYCQASSILHYAHGDNQ  
QPHLLQAGRTALGTGISAGKRPNPEEETQSVGPKVQRQSTN

>Ramphastos\_sulf\_NXP72287.1

MSHHTIHLFRKGLRLHDHPTLLAALRSSRRLYPVYILDLQFISSAMQMGLTRWHFLLQSLEDLQKSLCQLGSS  
LLVIQGGYEAVLRERVQWSITQVTLDAEVEPFYREMEANIRCLGQELGFEVLSLVGHSLYDTRKRVLDLNGGD  
PPLTYKRFLHILSLLDPELPVRSITAEDFQRCQPLDPGLAERYRVPLPADLKMPPELSLSPWRGGETEGLQRL  
EQHLTDQGWVATFTKPRITPNSLMPSTTGLSPYFSLGCLSVRTFFYRLAKIYAQAKHHSLLPPVSLQGQLLWRE  
FFYTVASVTPNFTRMAGNPLCLQISWAEDAERLHKWKTATGTGFPWIDAIMTQLRQEGWIHHLARHAVACFLTR  
GDLWISWEEGMKVFEELLLDADYSINAGNWLWLSASAFYHQYRRILCPVRFGRRTDPEGHYIRKYLPIKLNFG  
SKHIYEPWTASEEEQKQAGCIIGRDYPFPMVNHKEVSDHNLQLMQVREEQHRTAQLTRDDRDDPMEVKVRPE  
CSEEDLPRGKVARVAE

>Ramphastos\_sulf\_NXP76113.1

RFLQSLLEDLDNLSLRKLNSRLFVVRGQPTDVFPRLFKEWGVTRLTFEYDSEFPFGKERDAAIKLAKEAGVEVV  
IENSHTLYDLDRIIELNGHKPPLTYKRQFAIISRMELPKKPVSTVISQQMETCKVDIQENHDDVYGVPSLEEL  
GFPTDGLAPAVWQGGETEALARLDKHLERKAWVANERPRMNANSLASPTGLSPYLRFGCLSCRLFYRLWE  
LYKKVKRNSTPPLSLYGQLLWREFFYTAATNNPKFDRMEGNPICIQIPWDRNPEALAKWAEKGTGFPWIDAIM  
TQLRQEGWIHHLARHAVACFLTRGDLWISWESGVRVFDLLEDADFSVNAGSWMWLSCSAFFQQFFHCYCPVG  
FGRRTDPGSDYVKRYLPKLKGFPSRYIYEPWNAPEVQKAAKCIIGVDYPKPMVNHAETSRLNIERMKQIYQQL  
LSRYRGLCLLASVPSVEDLSGPVADSASGQGCSTSTAMRLSQADQASPKRKHEGTEELCTEDLYKRPKVTGL  
PATEVPGKSL

>Ramphastos\_sulf\_NXP79048.1

VDQERSHQGLAQLFLLFSSPVLKVDYDVCSNYGNWLYSAGIGNDPRDNRKFNMIKQGLDYDGNGDYVRLWVPE  
LQGIKGADIHTPWVLSSADLSQAGVTLGETYQPVVTAPEWSRHISRRPQGRSPHPRGRGPTHTSVQHKDRG  
IDFYFSGKKDV

>Rhamdia\_quel\_QGW67268.1

MVVNAVHWFRKGLRLHDNPSSLLECIQGADTLRCIYILDPWFAGSSNVGINRWRFLQCLELDANLHKLNSRL  
YVIRGQPTDVFPRLFEEWKITHLSYEFDSEFPFGKERDAAIKKLANEAGVEVTVGISHTLYDPEKIIEMNGGQS

PLTYKRFQMVISKMDTVEMPVETITAEILSKCIMPISDDHDERFGVPSLEELGFETEGLP  
SAVWPGGESEALT  
RLERHLERKAWVANFERPRMNANSFLASPTGLSPYLRFGCLSSRLFYFKLTDLYQKVKNSAPPLSLYGQLLW  
REFFFYTAATNRPCFDKMEGNPICVQIPWDRNPEALAKWAEGRGTGFPWIDAIMTQLRQEGWIHHLARHAVACFL  
TRGDLWISWEEGVKVFEELLLDADWSVNAGSWMWLSCSSFFQQFFHCYCPVGFGRRTDPNGDYIRRYLPVLR  
SFP  
PAKYIYDPWNAPESVQKLAKCIIGTHYPKPMANHAESRINIERMKQIYQQLSCYRGLSLLASVPSNANGN  
>Rhamdia\_quel\_\_QG67269.1

MVVNSVHWFRKGLRLHDNPALQEALNGADTVRCVYVLDPWFAAGANVGFNRWRFLLESLEDLDTSLRKLNSRL  
FVVRGQPADVFPRLFKENNVTRLTFEYDSEPYGKERDSTIIKMAQEFGVETIVRHSHTLYNPDRIIEMNNNNP  
PLTFKRFQAIIVSRLELPKKPLPTITPEQIASCSTQLSENHDKHYGVPSLVELGFKTQGGQSAPVWKGGETEAL  
E  
RLNKHLDDKAWVANFERPRIKAHSLFASPTGLSPYLCFGCLSRLLYNHLREFYMKLRRSSPPLSLFRQLLW  
REFFFYTAATNNPSFDRMEGNSICVQIPWDQNPEALAKWAEGRGTGFPWIDAIMCQLRQEGWIHHLARHAVACFL  
TRGDLWISWESGMKVFEELLLDADWSVXXXXXXXXLSCSAFFQQFFHCYCPVGFGRRIDPSGDYIRRYIPELKD  
YPSRYIYEPWNTPESIQKAANCIVGVDPKPMNLNHAESSRLNIERMKQVYQQLSHYRGLSLLASVPTIQEEVE  
PSMSDDSDQASSSGVISHHPQSQSEPQSSKTDPDNPDQDPDPEPSASSAPAAMRKRGCSSSEPQNFQNPVKVQHT  
S  
SQSKAKQLHADGKQ

>Rhinatrema\_bivittatum\_XP\_029438108.1\_cryptochro

MASGRNESPKALPLAVNSVHWFRKGLRLHDNPALQAALRGAQTLRCIYILDPWFAASSAVGIMRWRFLLOSLE  
DLDNSLRKLNSRLFVVRGQPTDVFPRLFKAWSVTRLTFEYDSEPFGERDAAIIKMAKESGVKIVIVENSHTLY  
DLDRIIELNDQKPLTYKRFQAIISRMELPRQPVCSITEPQMETCKAEIQQNHDETYGVPSLEELGFCTEGLG  
PAVWRGGETEALARLDKHLERKAWVANYERPRMNANSLLASPTGLSPYLRFGCLSCRLFYRLRDLYKKVKRS  
SLPPLSLYGQLLWREFFFYTAATNNSKFDRMEGNPICVQIPWDKNPEALAKWAEGKTGFPWIDAIMTQLRQEGW  
IHHLARHAVACFLTRGDLWNSWESGVRVDFELLLDADFSVNAGSWMWLSCSAFFQQFFHCYCPVGFGRRTDPS  
GDYVRRYLPKLKAFPSRYIYEPWNAPEALQKAACCIIGVDYPKPVVNHAESRLNIERMKQVYQQLSHYRGLC  
MLASVPSSSQELSNPLAGSASGQGGTIGAAPRLPHGAQTSPPRKDEGTEDLKSEDRFKRTKVTNLPIPEFFPAK  
DL

>Rhinatrema\_biv\_XP\_029455619.1\_cry-1

MGVNAVHWRKGLRLHDNPALRECIQGADSVRCVYILDPWFAGSSNVGINRWRFLLOCLELDANLRKLNSRL  
FVIRGQPADVFPRLFKWKITKLSIEYDSEPFGERDAAIKKLASEAGVEVIVQISHTLYDSDKIIELNGGQP  
PLTYKRFQTLISRMEPLEMPVETITSEVMETCSTPVSEDHDEKYGVPSLEELGFDTGLPSAVWPGGETEALT  
RLERHLERKAWVANFERPRMNANSLLASPTGLSPYLRFGCLSCRLFYFKLTDLYKKVKKNSSPPLSLYGQLLW  
REFFFYTAATSNPRFDKMEGNPICVQIPWDKNPEALAKWAEGRGTGFPWIDAIMTQLRQEGWIHHLARHAVACFL  
TRGDLWISWEEGMKVFEELLLDADWSVNAGSWMWLSCSSFFQQFFHCYCPVGFGRRTDPNGDYIRRYLPVLRG  
FPAKYIYDPWNAPEADSVQKAKCIIGINYPKPMVNHAESRLNIERMKQIYQQLSRYRGLGLLASVPSNPNGNG  
NGGLMSYSPGENTTTGTQIGATDGHTIGIQMLSQIEPSMGSNGIQHQGRSALSTGVINGKRPNPEEETQSIGP  
KVQRQSAS

>Rhinatrema\_biv\_XP\_029472371.1\_LOW\_QUALIT

MSRMATTPQHIADDLGAEVPIMTSSRKRHMEETLRGSYAELASVVDTKLMRPNESSGGGNLLQAVQRTLRAG  
SSVLEFAFNKKRVRLLISSNWDVKDDSQGIIYWMSRDQRVQDNWAFLYAQRLALKQNIPLHVCFCLEPTFLDST  
IRQFGFMLKGLQEVVEECKELNIPFHLLIGYAKDVLQPFIIEHDIGGLVTDSPPLRVPLQVQDVRENLP  
RRV  
PFVQVDAHNIVPCWVASNQEYAAARTIRKKIHEQFPWFLETFPALS  
KHPYNSKFTAMPVDWDACCASLQVDRS  
VREVDWATPGTAAGLSVLQSFIGERLKKFFCTDRNDPNKAALS  
NLSPWFHFGQVSVQRAVLEVKKYRSKFRDSV  
DGFVEEAVIRRELADNFCFYKNKYDKVKGAYDWARSLRDHVKDKRTHIY  
TLEQLEAGKTHDPLWNAALQLMV  
QEGKMHGFLRMYWAKKILEWTSTPEIALKYSIYLNDRFELDGRDPNGYV  
GCMWISICGIHDQGWAERDVF  
GKIR  
FMNYAGCKRKFDFVEQFERRYN  
SKKFTF

>Rhincodon\_typ\_XP\_020390164.1\_cry-1-like

METHSIHWRKGLRLHDNPALKEALRGASTVRCVYILDPWFAGSSNVGVNRWRFLLOCLELDASLVELNSRL  
FVIRGQPADVFPRLFKASSCELYAVSATSMHLIIELNGGQPPLTYKRFQTLISQMDSEPPVETISERSLGKS  
TILVLDDHNEKYGVPSLEELGFDTGLPSAVWPGGETEALT  
RLERHLERKAWVANFEKPRMNALSLLASPTGL  
SPYLRFGCLSCRLFYFKLT  
ELYKRIKKTDSPPLSLYGQLLWREFFFYTAATNNPCFDKMEGNPICVRI  
PWDKNP  
VSLAKWAEGKTGYPWIDAIMTQLRQEGWIHHLARHAVACFLTRGDLWISWEEGMKVFEELLLDADWSVNAGSW  
MWLSCSSFFQQFFHCYCPVGFGRRTDLNGDYVRRYLPVLKGFPAKYIYDPWNAPENSVQVAAKCIIGIHYPKPM  
VIHAEASRLNIERMKQIYQQLSRYRGLGLLASVPSNPNGSGGTMYS  
LGDQITENNGIVQSHTNGAMV  
GKRELE  
RDTAAGDDMESLAQKVRQSDDNNEDEQN  
LNLVSY

>Rhincodon\_typ\_XP\_020392441.1\_LOW\_QUALIT

MSKNDKQAHETT  
RCNANDSEYKKNIEKKS  
DKKKTAFSSLSNSLKTSTK  
VSMKKPNHNGSCREDS  
PKLQSKGKR  
KVEDRAPRLIEGEMSNPRMNKKRKIEDQAEASPSRERNLLESINKSRLSTAKSV  
EEFNFKKRIRLLSKTESI  
RENSQGIIYWMSRDQRVQDNWAFLYAQWLALKHKLPLHVCFLVPKFLDATIRH  
FGFMLKGLHEVAEECKQLN  
ISFHLLIGFAKDVLPDFVKEHNIGGMVTDSP  
LRLPLEWIENVRYNLPEDIPFIQVDAHN  
NVPCWVASDKQEY  
SARTIRKKIHDKLPQFLTD  
FPPVIQHPFSSSLKAE  
LIDWDA  
AAASLQVDR  
TVKEVDWAKPGTAAGLTRMESFI  
NEQLKHFNTDRNNPSKTALS  
NMS  
PWFHFGQISVQRAVLEIRKYRNKFKDSVDSYIEEAVVRRELADNFCFYNK

QYDKIAGASDWAQKTLQMHSKDKRPYVYTLKELEDGRTHDSLWNAQLQMIHEGKMHGFLRMYWAKKILEWTA  
SPEEALQFSIYLNDRYELDGXDPNGYV

>Rhinopomastus\_cyan\_\_NXN91581.1

DNWAFLYAQRALALKQELPLRVCFCLVPKFLDATIRHYRFMLKGLQEVAKECAELNIPFHLLLGWARDVLPFV  
VKHGVGGLVTDFCPLRLPRQWVEEVKMQLPEDVPFAQVDAHNIVPCWVASPKQEYSAQTIRGKIHTQLPEFLT  
EFPPVVRHPHSPSCPAEPIAWEACYSSLQVDHTVGEVAVATPGTAAGLAMLRSFIAERLKSFSSSHNNPNKAA  
LSNLSPWFHFGQVSTQRAILEVQKHRGRYKESVEAFVEEAVVRRELAENFCYYNENYDSVQGAYSWAQTTLKL  
HAKDKRPFLYELQELEQATTHDPLWNAQLQMVREGKMHGFLRMYWAKKILEWTRTPPEALQFAIYLNDRYEL  
DGRDPNGYVGKRCLWSICGIHDHGWTERAVFGKIRYMNYAGCKRKFVVGQFERRY

>Rhinopomastus\_cyan\_\_NXN98048.1

MPHRTIHLFRKELRLHDNPTLLAALESSEVIYPVYILDRKFLTSTMHMGTLRWHFLLQSLGDLRKNLSQLGSC  
LLVIQGEYESVLRDHRVQWDITQVTLDAMEPFYKEMEANIRRLGEELGFEVLSLVGHSLYDTKRILDLNGGT  
PPLTYKRFIHLISLLGDPMVPVRNPTAEDFQSCSPPEPGLAERYAVPLPVDLKLPPESLSPWKGETEGLQRL  
EQHLTDQGWTSTFTKPRITIPNSLLPSTTGLSPYFSLGCVSVRTFFYRLSNIYAQAKHHSLLPPVSLQGQLLWRE  
FFYTVASATPNFTQMAGNPICLQISWYEDAELKHKWKMAQTGFPWIDAIMTQLRQEGWIHHLARHAVACFLTR  
GDLWISWEEGMKVFEELLLDADYSINAGNMMWLSASAFFHQYTRIFCPVRFGKRTDPEGQYIRKYLPIILKNFD  
SKYIYEPWTASEEEQKQAGCIIIGQDYPFPMVDHKKASDHNLQLMKQVREEQYRTAQLTRDDADDPMEMKVKHP  
IAEEKVPKVKAPRMAE

>Rhinopomastus\_cyan\_\_NXN99823.1

LQEWGVTRLTFEYDSEPFGKERDAAIKLAKEAGVEVVIENSHTLYDLDRIIELNGHKPPLTYKRFQAIISRM  
ELPKKPVSTVISQQMETCKVDIQENHDDLIGVPSLEELGFPTDGLAPAVWQGGETEALARLDKHLERKAWVAN  
YERPRMNANSLASPTGLSPYLRFGCLSCRLFYRLWELYKKVKNSTPPLSLYGQLLWREFFYTAATNNPKF  
DRMEGNPICIQIPWDRNPEALAKWAEKGTGFPWIDAIMTQLRQEGWIHHLARHAVACFLTRGDLWISWESGVR  
VFDELLLDADFSVNAGSMMWLSCSAFFFQFFHCYCPVGFGRRTDPSGDYVKRYLPKLKGFPSRYIYEPWNAPE  
SVQKAAKCIIGVDYPKPMVNHAETSRNLNIERMKQIYQQLSRYRGLCLLASVPSCVEDLTGPVTDASSGQGCST  
STAVRLLQADQASPKRKHEGAEPECAEELHKRPKVTGLPAPEIPGKN

>Rhinopomastus\_cyan\_\_NXO01642.1

MGVNAVHWFRLRLHDNPAALRECIQGADTVRCVYILDPWFAGSSNVGINRWRFLQCLELDANLRKLNSRL  
FVIRGQPADVFPRLFKEWNIAKLSIEYDSEPFGKERDAAIKKLASEAGVEVIVRISHTLYDLDKIIELNGGQP  
PLTYKRFQTLISRMEPLEMPVETITPEVMEKCTTPVSDDHDEKYGVPSLEELGFDTDGLPSAVWPGGETEALT  
RLERHLERKAWVANFERPRMNANSLASPTGLSPYLRFGCLSCRLFYFKLTDLYKKVKNSSPPLSLYGQLLW  
REFFYTAATNNPRFDKMEGNPICVQIPWDKNPEALAKWAEGRGTGFPWIDAIMTQLRQEGWIHHLARHAVACFL  
TRGDLWISWEEGMKVFEELLLDADWSVNAGSMMWLSCSSFFQFFHCYCPVGFGRRTDPNGDYIRRYLPVLRG  
FPAKYIYDPWNAPESVQKAAKCIIGVNYPKPMVNHAESRLNIERMKQIYQQLSRYRGLGLLATVPSNPNGNG  
NGGLMGYSPPGESISGCGSTGGAQLGTGDGHTVVQPICALGDSHTGASGIQQQGYCQASSILHYAHGDNQQSHLL  
QAGRAALGTGVSAGKRPSPEETQSVGPKVQRQSTN

>Rhizoclostridium\_glo\_ORY43053.1\_putative\_p

MKRAGSPTATNKSDAKKAKTSTESRCFVHWRNDLRLADNTSLSWVVQEASRASKPVVCLFVISAAEWNQHEM  
APAKVRWLLASLESLSKENLKERGIPLVVRVSESRRGVPKVVVDTVSELGAEAVGWNWEYEVHEEWRDHTVMDS  
LEKVGIKHNGMHDQCVIDTSRVRTKEGKPYTVFTPFKKTWIQTIVKNAHLVKLRDAPTENTAPISDTLAAKIE  
TLSTAIPGPSDPLPAPYTESDNPPASVTEFINKTFAPSEKAAATRLATFIESRGKSYKDRDFPGKDLTSKLS  
PYLSLGLISPRVCLDAVKANNGKYDSGNEGLVTWWISEICWRDFYRNILIEFPRVCKNLFPKPKETDNVEWNYS  
RDNPLYIAWCEGKTGFPIVDAGMRQLATEGWMHNRVRMIVSSFLTCKDLGVDWRLGESWFMRLNIDGDLASNNG  
GWQWSASTGTDSPYFRIFNPLLQSERFDPDGHYIRKYVKELSAVKGKEIHDPKGRGLSAYFAKLGPYPKPIVD  
HKTASQAFLAAFKKGIGK

>Rhizoclostridium\_ORY50797.1

MPVAVHWFRLKALRLHDNPAALAKAVAACSAPNSSLLPVYTLDPHFVKNSHIGTNRWLFFLESQDVDRSLSESG  
SKLLVLRGEPMTLFTLFDTLIANGETVSLYFEADTSPYARNRDAAMLELCASKNIAVHTFNSHTLFPNSDVI  
KVNNGITPIVYQSFLKVIKMPAIQPATPTLTQVPLSDMKALLTYTETFGFADFQVPSMEDIGKAVPGEN  
LVSTHKGGEREALKRLEEYMKQKDLVCKFQKPETNPAAFQPASTTILSPYLMGSLSARTFYHELMKVYRASK  
IGYTKPPVSLGLQLYWREFYTAGYGTPNFDKMLGNPICKQIPWRTDEQSNVDLEKWATGQTGFPWIDAIMIQL  
KQEGWIHHLARHSVACFLTRGDLYISWERGAKVFEKLLIDADWSLNTGNWLWLSASAFFHQYFRVYGPVSFP  
KKYAPESVKYVRKIIPALKNFPEKYLFEFPWKCPADQKKAGCIIIGKDYPKPMCDHDAVSKVNIGMKMVAYDEG  
KVASPPKAPKGRPLDED

>Rhizoclostridium\_ORY50805.1

MTSCVLFRLLTDLRLHDNVTLARAIADATTNNKTLPLMFVWDTRFLGLAPTQQHQSLPSRIGTTWHFGFPRLSA  
QRQRFLLESVLDLKSQLQKLKSDLVIVPPHNVALSDYISAQIVPSLQNGSDGGVSVFMGADSPCYEERILER  
ELSECTGFSLKLVDNHTMLSMSAVEGRVPDIYTQFRSNIERSASAKSDISFPAVALPLPSPTKLPSSPVNVV  
MEHTLSLEDLESLLKSCPANKSQPSVSFPFGGETAALARLKAYMSGPIAKYKETRNGLLGSDYSTKFSPLYLA  
WGCLSARTIIHAMRPLTAKAQDGTYWAWFELLWRDYFYFVARDYGNMLFYPTGLTDTVPKAGYTHAPTNPKFV

AWCEGRTGVPFVDANMRELKATGFMSNRGRQNVASFLVKDLGVDWRLGAEWFEAMLLDHDPSCSNYGNWLYVAG  
WGNDPRQATEGDRYFNVLKQARDYDPKAEYVLAWCPHELHGHPNPHAPWTRTGVFGSDNLYARRPICMGKGWD  
RHLEVRAESGKKEGNRHRVPKKF

>Rhizoctonia\_sol\_CAE6419686.1\_unnamed\_pr

MARRIAIALLRNDLRVSDNPILHAARNASGITHLLPLFVFDDRQVELSGVVGYREAQHGGDEPLPIAKTRICG  
FWRTGRHRVSLASPRFLVQSVFDLKSQKLSAGSDLGVLGRPENVPVPHLIHQKQKQDGTIEGVWLQRESASEE  
VSVERQLSRALQGMRTTLHLDSGARTLVHESDLPPQLPSQLPDVFTVFRKRVEGLNENMVRPVLPPYPSKGEWK  
PYPTLKDYTKDTSSRSIFALPNDMTEDHFIEQLTAPLVAEPVPGDTSHGTAYYEVPGAAPFPKGGESAARQRL  
DYYLGIGGAEESCPATTYKETRNGLLGADYSTKFSPLYTFGCLSAREIAARCDDLEDRLREAGSLTDTARKNI  
YWIKFELLWRDYMFFVNIKYGNLFLKPKQGLLTGASPGKSEWTEWENRNDKLQAWFEGRTGVPFVDACMRELAS  
TGYSNRGRQNVASYLTKDMHFDWRIGAEFFESFLLDYPASNYGNWAYVAGVGNDPRQGRKFNI IKQANDYD  
PNGEYVKQWVPEVSGSELGTGFQRHIPWRVWSGAEESSRGSGSYPRSPIVEDSGWKRIFYSTGDGKQKGHERGSK  
GGRGKGRGRKH

>Rhizoctonia\_sol\_CAE6534518.1\_unnamed\_pr

MASKRGRATSSNKPAKKQKTMDFVKSNNVKSAAASSEPEDAPASEIAYVQQVHGKIATAENAARVDTEPPLGR  
LQNAISEHKDELNRNISKGDSVMYWMRMEDMRIRDNRAFSAASNAQDLGLPLVLFIFSPDDYVSHDRSPRRI  
DFCLRNLAVALKEKLNEMNIPLHVTSTHTPRKTLPEEVIKLARKWNARRIYANIEYQVDELRRDMRLVHLGTMAS  
IRTEYFSDRCVVEPGALATKEGKQYAVYSPWLKNWVATLDRDPSRLEESPMKPNDEKVRFECHDRETMIKLY  
PAGEDAAHEVLERFLHTKSRTSQLADASPLAPDAETSSNHSRIKDYMSDRDRADADTTSRISPYLASGVISAR  
ECVRSAMNILGVKRVDAKGTNGPGVWVSEIAWRDFYTHVMAAFPRVSMGRPFHEKFADV KWETNAHLKAWKE  
GKTGVPIVDAALRQANTQGMHNRTRMIAAMYLTKDLMLDWRLGEKHFMEQFIDGDLASNNGGWQWSASTGTD  
PQPYFRIFNPYSQSEKADPSGNYIKYFVPELKDLSGKALHDPYGHLSPPSEFKKLGYPKPLVDHKEARERARR  
YKNPGEE

>Rhizoctonia\_sol\_CEL59601.1\_cry-2\_OS=G

MTPRPRVLHWFRTDLRVHDAPALQAGLALKPEVWYPVWCWDPEYVYSHRVGVNRFNFLIESMNDLSQSLTRIN  
DKSKLLVVRGSPYTVLPKLFKRDWKITHLVYELDTGGYAQERDKRVQEIATQNKVQVVDVLGHSLYHPAEVIEK  
NGGKPTTTITQWQKAASKLGSVPRPTAAPKKLI PPGLHLGSLSREDHPVNREHDLNEKTRISPVTCTFDTLTG  
PKGDFAVPTLEELGYPNPTTTIRGGEKEGRARLFAFNKDDNGNRAALFEKPKTSPTIPGPFKASRTNNGHEDT  
LQEDGDEFEDLPEGAQIDVTKPSTTLMSPYLKFGCVGVRECYWSWHDILVNAPKSAKKPENLLGQLEFRDMYY  
AAELAVGGTAFARVQGNPICRYIPWRCPTVYSDDTNQIIPRPKDEQHPRAEEWLAAWTEGRTGFPWIDALMRQ  
LREEGWMHHLGRHSVACFLTRGQCYISWERGAEVFDEYLDWD PASNYGNWMLSCSAFFSQFMRVYGVATWP  
SKFDKTGALVRKYIPELQNFNPQYIYEPWLAPKSVQKEAGCIIGKDYPSMPLDEKEEKGRNIERMKAAYQAGL  
YGDSPKVLDTATIEVPNKPEDDDSNKAGTKRKADKSGGSKTRSTRTRKVSDDGQKSLDAYMKKK

>Rhynchosporium\_agr\_CZS96539.1\_related\_to

MSDSKVLIIYLMRRDLRVSDNPVLNSLVTSKKHGFTHLLPLYVLSAQQLETSGFIADSNTKSPYREARSKVGGF  
WRTGPHRVTFLAECIYDLKEGLEKVGSGLCRLRVGTVGDDVMDLRKFKEKELKAGAVWMIGEEGVVEEAGEES  
QVKKACREADVEFKLWNDEKYLIDDRDVPFDNIDELSDVFTTYRKTVEPLRESPRKVLPTPTKGLSPFPPTS  
STPEQRSPTTIPNSLETLOSSLKPLQAQDLVKNPPSYPKETKSAHPFLGGETQAHDRNLNYLIKSGNVTNYKD  
TRNGLLGHDFSTKFSAYLALGCITARQIHSNLLAFEDGTNDTFKGGNGYKGGENAGTKSIRFELLWRDYMRLC  
TRKFGPKLFRLSGFKAEEGEKWSTPAKPAPGVSSQQVRDQIERFLNGTTGMGLIDASMREMYHTGYTSNRARQ  
NVASFLT KHLKIDWRIGAEWYESMLVDYDLSSNWGNWQYVAGVGNDRPGDNRI FNPVKQAFDYDPEGDYIKAW  
VPELQKLTEPAEVFQAWTVREDVRKEKGLQGLNWVENPLLRINFVTNKRGRNGGKRGGGGGRGEYGHGHHGGGR  
FNEQDGRYYANNRNRNGGSGRGGGGYGGGGYAGRGYSSRGHLKNGYGSGRGGGGREFRTGMMDKVTEY  
EQSTQ

>Rhynchosporium\_agr\_CZS99641.1\_related\_to

MAKPRVIYWFRTDLRLHDSFALKAALDLNAEAFWPVWTDPHYVYRARVGTNRWQFLIDCQNDVSKNITKINN  
NSKLFLMREAPQTLLPKLFAWRITHLVFEKDTDAYARERDAAIMEAAREAGVEVVRSGRTLWDSDELVKKN  
HGKPTMSISQVQAAGPKAGPIPRPIPSPKSIPDPGETSVDFEQHQPEQAPDFNSKYRNQNDKSYESIAGPKGD  
FAVPTLEELGFPAATTSHRGGENNALKVLDLIANEKYTATFEKPNTAPTQFLPQSTTLLSPHLHFGSLSIRE  
FYWRVQDVVDNFGSKSSQPPVSLTGQLLFRDMYFQAQAKLGAFGQTMYNSHCRFIPWHLPSKVDHETKLVGT  
EYHIDSPQAEWFWQRWKYGMTGFPWIDALMRQLRQEGWMHHLGRHAVACFLTRGGCYISWERGAEVFEELLID  
HETACNAGNWQVLSCTAFFAQFFRCYSPIAFPQKWKDKQGEFVRRYVPELAKLDKKYIYEPWKAPIADQKKAGV  
SVKGDGRSKEVGVYPKPMFDFAEERRTICLDGMKNAYKVAMYGDHEKVIDGSWREMF GDGAEGPTEGKS FVDAM  
SGFGRKIRDGDDVDVENDGAVAEDERGAAEKGSGSGGDERKTGTRKAAQATLDGIVKRAKRK

>Rhynchosporium\_agr\_CZT06608.1\_probable\_p

MLSKKAATNGKRKASPPVEPAPKSKITS DSTDPLRQPHETAQEAEDNGIVLREFYPKEMNNARAKAYNSDQL  
PRPIELLNNALKDTKAARQKILAKDAVVHWFKCDLRTMDNKS LHLASEKAKEGVPLIAMYIVSPQDFQAHLT  
SPVRVDFILRTLEVMMKKDLAIMDIPLYVETVEKRRNVQGRILELLEEWGANHLFTNVEYEVDELRRREARMVRA  
CLEKGIAMDVVPDTCVVS PGELSSGTGKQYSVYSPWFRSWTAYVHSNPKVLDLDFNAPDKNPPTAREKFAKLFE  
QSI PDAPANKTLTDEEKKRFRSMWPAGEAEAHERLRKFCDDRIGKYGDKRNFPAQGATSSLSVHFASGTL SAR

TAIKTARDHNTTKKLDAGNSGIMTWVSEVAWRDFYKHVLAHWPYVCMNKPFKPEYTNITWEYNQEHFKAWTEG  
KTGYPIVDAAMRQLNHCGYMHNRCRMIVGSFLAKHLLLDWRMGERYFMEHLIDGDFASNNGGWGFCASTGVDP  
QPYFRIFNPLQLQSEKFDLEGEYIRKWVPELEGVKGKAIHDPYSRGEVRAKKMGYPQRIVDHKACRERALAR  
KEGLGRDTA

>Rhyparobia\_mad\_AGA01579.1\_cry\_2

MSLEKSPKHTVHWFRKGLRLHDNP SLREGLKCAKTFRCVFILDPWFAGSSNVGINKWRFLQLQCLEDLDRSLRK  
LNSRLFVIRGQPADALPKLFKEWGTNTLTFEEDPEPFGRVRDQNMAMCKELGISVITRVSHTLRYLENIEN  
NGGKAPLTYHQFQTVIASMGPPPPAEPNISPKFMNGAYTPIGDDHDDKYGVPTLEELGFDIEGLLPPVWQGG  
PEALARLERHLERKAWVASFGRPKMTPQSLLASQTGLSPYLRFGLCLSTRLFYYQLTDLYEKIKKACPPLSLHG  
QLLWREFFYCAATRNPNDKMMGNPICVQIPWDKNAEALAKWANGQTGFPPWIDAIMTQLREEGWIHHLARHAV  
ACFLTRGDLWISWEEGMKVFEELLLDADWSVNAGMWMWLSCPSFFQQFFHCYCPVRFGRKADPNGDYIRRYLP  
VLKNFPTRYIHEPWNAPESVPKAAKCIIGKEYSLPMVNHAVASRINIERMKQVYQQLSKYRGPGLLATVPTSQ  
PQSANIMNQFSLNRGFKKSPNLEQKWEKSPTDSVVNGLSPSYGEDSVNGIQLHRYHMQNKQSQPQHQQDIEE  
CE

>Rodentolepis\_nan\_VD007365.1\_unnamed\_pr

MCINISGHISPPQRCLWEAGFLQNQHKEVSDAFIEEAFIRRELADNFCFYNKHYDSLKGKYLCHITYFRAWSWA  
QETLRKHSNDIRQPSYSEEKMESASTGDELWNAAQROLLWEGKMHGFLRMYWAKKILEWHAGGPEKALKGIY  
LNDKYSIDGTDPNGYVGVWMSICGIHDQGWMPVFGKIRFMNFTGCKRKFDVAAFIKKYSPINKHLKA

>Rodentolepis\_nan\_VD014864.1\_unnamed\_pr

MRVLHWFRKGLRLHDNPALLATINPPKKATEETIEILLLYVFDTSKEYGLRGHRQAQFLLESIDLDQSLQK  
LGKNLRLLVVEGDPIKEVPAICKSLDIKYVTFTETDIEPYSIARDNEVTKVLEEEGVTVSRIHGHTMWDPEFLK  
SHHHPPPTATKDSNSKDLGVPMTYKSFCALVRRVSPQGPPKPLPSFKEYAKSCIAPNLPKLDKLVHIGPPSS  
LEQLRIKFDPIPEIGDHVSDNEGEKFEELNFPGGIEIEGLNRLQRMVAQRADWVCSFSKPEAPTSLPISTTGLS  
PYIRFGCVSARHAWVIAEAMRPSSKASKTKPPTQPPVSLHGLLWREFFNLVASVTPSFDQIEGNPICRPIE  
WNVDETLLSAWREARTGFPFIDAAMIQLHRHGWMHHLARHSVACFLTRGQLWQSWTAGADVSTLLLDADWVL  
NSANWMWLSASAFFHQYYRVYCPVSFGRKTDQDGFIRHFIPALRNMPSEYIYDPWTAPISVQKKAGCRDKSL  
ETTIFIYCDTPGPGFRACPSHSERIDKLMRFYC

>Rotaria\_soci\_CAF3317211.1

MSKRKESMPMGKKRKVRKTSSEDCNTTEKEDEFEFEFEQEQEQEQKDELASKITNTKANTTVIDYFTIKPLQSA  
IDHIRKSICSSITEFKFNKTRVRPINKINEIPQDSQITILYWMSRDQRLQDNWAMLYAQRLAIKQQLPLHVAFC  
LVPTFLAASLRAIRFMLKGLREVEKECQQLNII FHLLLGKAENVLPKFVEDNKVGTIITDFSPLRVPRQWVDN  
VGKKITKIPVQVDAHNVVPCWHASPKLEYGARTIRTKLHKHMNEFFTEYPPVIKHPHTSTTHSEMKTIDWET  
VDDSLQVDRTVNEVSWATPGYTGGIAQLESFINERIMSFGTSRNDPTKNVLSNLSPWLHYGQISPPQALLIVA  
KLRSKYKEACDEYIEETFVRRELSNICYFYQDNYDNINGAWDWAKKTLNDHRKDKRTYEYSRDDLEYARTTDK  
LWNAAQIQMIKEGKMHGFLRMYWAKKILEWTKTPEEAIEISYILNDKYNLDGRDPNGYVGIMWSICGIHDQGW  
RERPIFGKIRYMNNDGCKRKFDVKQFENKYSCL

>Rotaria\_soci\_CAF3324377.1

MKRLGIVWFRNDRLRLHDNELLAWAHANNDYVNMHCFDPRQITDKTYKCDVFKCDKYRLKFLIETIENLNTSL  
ISNGSGLLTYPDTPENVFKQLIQYKDKFEISIGFHFQEVTEETDVEKAIRQLARDNNVHVKEFWTTTLYHPD  
DLPYNNPKAFPDVFTQFRVALEKQNVPRSLTNIPDKFKPLPDGSIVTFIPALADYGYSNVTVHSSSVFPFTG  
GESSALAHLSYIWEKNLAKSYKQTRNSLTGCENSTKFSPLANGSLSPRKICVELKKYENEQGAADAGYWI  
FELLWRDFFKFTALKYGARLFYGRGLKSNPYDWKHDLLQQFEAWRTGTTGVPPVDANMREFMNTGWMNSNRGRQN  
VASFLTKDLSIDWRYGAVWFESILIDHVCNSYGNWVYVAGIGNDPRENRHFNMIKQAFDYDSSGEFVRTWCP  
ELARLPNEYIHTPWLAPSHILKDAAVELGVNYPRPIIVVPQWNQQSQNWRTSLQNQHHTQQRGIDFYFKKPEK  
RH

>Rotaria\_sord\_CAF0871498.1

MSKRKETMSKVRKKREKKTNESDNNTNEKEDDIEEEDEEEQKNNLAQKISNTKTNTNLIDYFTIKPLQLAID  
HIRKNICLNILDFNFNKNRIRPINNIIIPQDSQIILYWMSRDQRIQDNWAMLYAQRLALKQQLPLHIVFCLV  
PTFLAAPIRAYRFLMLKGLHEIEKECQQLNII FHLLIGQAENILPKFIENYKVGTIITDFSPLRISRQWLENVA  
KKITTIPIVQVDAHNVVPCWHASTKLEYGARTIRNKLHKHMNEFFTEYPPIIKHPYTSSNDYQIKSIDWQAVD  
DSLQVDRTIKEVSWAIPGYTGGINQLETFINERVMNFALRRNDPNKDVLSNLSPWFHYGQISPPQALLIIAKL  
RPKFKDACDSFIEEAFVRRELSNICYFYQENYDTINGAWEWAKKTLNDHRNDKRTHIYSRDDLEYARTYDKLW  
NASQIQMIKEGKMHGFLRMYWAKKILEWTKTPEEALDIAIYILNDKYNLDGRDPNGYVGIMWSICGIHDQGWKE  
RPIFGKIRYMNIEGCKRKFDVKQYENKYSCL

>Rousettus\_aegy\_KAF6464657.1

MAATVGTAAAAPSAPAAAGTDGASSVHWFRKGLRLHDNPALLAAVRGARCVRVCYILDPWFWAASSSVGINRWRF  
LLQSLLEDLDTSLRKLNSRLFVVRGQPADVFPRLFKEWGVTRLTTFEYDSEPFGERDAAIMKMAKEAGVEVMTE  
NSHTLYDLDRIIELNGQKPPITYKRFQAIISRMELPKKPVGSVTSQQMESCRAEIQENHDETYGVPSLEELGF  
PTEGLGPAVWQGGETEALARLDKHLERKAWVANYERPRMNANSLLASPTGLSPYLRFGLCLSCRLFYRYRLWDLY  
KKVKRNSTPPLSLFGQLLWREFFYTAATNNPRFDRMEGNPICIQIPWDRNPEALAKWAEGKTGFPPWIDAIMTQ

LRQEGWIHHLARHAVACFLTRGDLWVSWESGVRVFEDELLLDADFSVNAGSWMWLSCSAFFQQFFHCYCPVGFG  
RRTDPSGDYIRRYLPKLKGFPSPRYIYEPWNAPEVQKAAKCIIGVDYPRPIVNHAEISRNIERMKQIYQQLS  
RYRGLCLLASVPSCVEDLNNPVAEPSSSQPGSMNNAGPRPLPSGPASPKRKLEAAEPPGEELSKRARVAELP  
TSELPSKDV

>Rousettus\_aegy\_\_XP\_016003549.1

MGVNAVHWFRKGLRLHDNPALKECIQGADTIRCXYILDPWFAGSSNVGINRWRFLQCLELDANLRKLNSRL  
FVIRGQPADVFPRLFKEWNIAKLSIEYDSEPFQKERDAAIKKLATEAGVEVIVRISHTLYDLDKIIELNGGQP  
PLTYKRFQTLISKMEPLEIPVETITSEVIEKCTTPLSDDHDEKYGVPSLEELGFDTDGLPSAVWPGGETEALT  
RLERHLERKAWVANFERPRMNANSLASPTGLSPYLRFGCLSCRLFYFKLTDLYKKVKKNSSPPLSLYGQLLW  
REFFFYTAATNNPRFDKMEGNPICVQIPWDKNPEALAKWAEGRTGFPWIDAIMTQLRQEGWIHHLARHAVACFL  
TRGDLWISWEEGMKVFEELLLDADWSINAGSWMWLSCSSFFQQFFHCYCPVGFGRRTPDNGDYIRRYLPVLRG  
FPAKYIYDPWNAPEGIQKVAKCLIGVNYPKPMVNHAEASRLNIERMKQIYQQLSRYRGLGLLASVPSNPNGNG  
GLMGYSYPGENIPGCSSSGSCSQGSGSLHYAHGDGQQTHMLKQGRSSMGTGLSSGKRPSQEEDMQSIGPKVQRQ  
STN

>Rozella\_all\_EPZ35776.1\_DNA\_photol

MKRSLEKGEMVLKKVSQRALMWFKSDLRVTDNPALRNASLYGEVIALYIISPQEWKSHDVAPIKVDFILRNKL  
KLRESLNELNIPLVVKQINHVKETPNLILNHCKEWNINAVFINKEYEVDESKRDLKVQKTLEENGFLFDITHD  
QCVVPPGRVLTGDGKPYSVFTPFKKAWIKILLAENSLIQVIPLPEPNIDQSLIIHQEKNEIPEKVEGFDISKK  
YDADYVRGLWAAGKEAAHKKLEQFSKFILDYKKNRDAPALDGTSVISPFLAIGALGIRECLNEALIANKGLL  
DSGNEGAVTWISELCWREFYRHVLFHYPRVCMYQPFKLETKNIKWRDDPEGFEKWCKGETGYPIVDAGMRQLN  
KTGWMHNRSRMIAAMFLT KDLLIDWRKGEKYFMENLIDGDFASNNGGWQWSASTGTDSQPYFRVFNPLLQSQK  
NDPDGVFIKKWVPELKGKLNKKQIHCPKDCLGASEFKKLNYPPLPLVDHDMARKRAIDAFKNLKTDEEPPKAY

>Rozella\_all\_RKP18286.1\_ROZALSC1DR

MERHPSVKTVSYERDYPYSIKRDKLEDEFFNEADINVRTFGTHVLYEPTQVLEKNNGVAPLTYQGFLKVVNK  
LGKPGFPIPPPTKLPGFFDLQKILNCNEGIEFAGPNKTFDVPALQELGFETPLYRSPHHGGESVALQMLDKYF  
LDKTKVLTFEKPNTSPAADFPASTTVLSPYVKYGCLSVRLFYQRLMDIYRNQSHSKPPVSLEGQLFWREFYYT  
AGYATPNFHRMEGNPICLQTNWRLKEKDDVDDEEASKHLEAWRDGTTGFPWIDAIMNQLRQEGWIHHLARHSA  
CFLTRGDLYISWERGAEIFEYLLLDADYFLNFGNWLWLSASAFFHQYFRVYSPIAFPKKYDPEGNFVRKYVPQ  
LSQFPKKYIYEPWKAPLEVQRKANCIIIGKDYPKPIVEHDVIV

>Rynchops\_nige\_\_NXN49257.1

DNWAFLYAQRLALKQELPLHVCFCCLVPKFLDATIRHYGFMLKGLQEVAEECAELNIPFHLLLGAKDVLPAFV  
VERGVGGLVTDFCPLRLPRQWVENVRERLPEDVPFAQVDAHNIVPCWVASPKQEYSARTIRGKIHAQLPEFLT  
EFFPIIRHPYPSPCPPEPIAWEACYSSLQVDCTVKEVEWATPGTSAGLAVLQSFITERLKSFSSSHNDPNKAA  
LSNLSPWFFHFGQVSTQRAILEVQKHRGKYKESVDAFVEEAVRRELAENFCYYNENYDSVQAYDWAQTTLKL  
HAKDKRPFLYKLQELEQGTTHDPLWNAQLQMVREGKMHGFLRMWAKKILEWTRSPPEALQFAIYLNDRYEL  
DGRDPNGYVGKLQDGGMGFGGCLWSICGIHDQGAERAI FGKIRYMNYAGCKRKFVDQFERRYAP

>Rynchops\_nige\_\_NXN49677.1

MLHRTIHLFRKGLRLHDNP TLAALESSEVLYPVYILDRKFMTSVMHIGALRWHFLLQSLEDLQKNLCQLGSC  
LLVMQGEYESVLRDHVQKWNITQVTLDAEMEPFYKEMEAKIRCLGEELGFVLSLVGHSLYDTKRILDLNGGT  
PPLTYKRFLHILSLLDGPEVPVRNLTAEDFQRCRSPDPGLAEGYRVPLPVDLKI PLESLSPWRRGETEGLQRL  
EQHLTDQGWVASFTKPRTPVNSLLPSTTGLSPYISMGCLSVRTFFYRLSNIYAQAKHHSLLPPVSLQGQLLWRE  
FFYTVASATPNFTRMAGNPICLQISWYEDAERLHKWKTAQTGFPWIDAIMTQLRQEGWIHHLARHAVACFLTR  
GDLWISWEEGMKVFEELLLDADYSINAGNWMWL SASAFFHQYTRIFCPVRFGKRTDPEGQYIRKYLPI LKNFP  
SKYIYEPWTASEEEQKQAGCIIIGRDYPFPMVNHKEASDHNQLMRQVREEQPRTAQLTRDDTDPMEMKVKRD  
RPEENVSKGKVARTAE

>Rynchops\_nige\_\_NXN52096.1

MQHSSIHWFRLKGLRLHDNPALLAAATDCCRLHPLFILDPSSSRVGANAWRFLLDALRDL DGRRLREMGSRLFVV  
RGCPEEVFPRLFHAWGTTRLTFEVDTEPAARQRDAVAELAQAQHGVEVIREASHTLYDTERILALNDSKAPLT  
YKRLQSLLASLGPPEKPAPALTQEHLRGCTPCQVSHDIDYGVPTLEELGQDPTKVGPPLYPGGETAALARLD  
MHMERTAWVCGFKKPEPETPTSLSPSTTVLSPYLRFGCLSVRTFWWRLEDEVYQGRKHSQPPVSLHGQLLWREFF  
YTAGASIPNFDRMVGNPVCLQVNWDDNPQHLRAWREGQTGYPFIDAIMTQLRSEGWIHHLARHAVACFLTRGD  
LWVSWEEGLKVFEELLLDADWSLNAGNWLWLSGSAFFHRYFHVYSPIAFGKKTDRDGAYIRKYLPI LKDFPTE  
YIYEPWKAPLAVQERAGCLVGTHYPRPIVEHRAASERNMGRMKAARAQR

>Rynchops\_nige\_\_NXN56413.1

CIIYILDPWF AASSAVGINRWRFLQSLLEDLNSLRKLNSRLFVVRGQPTDVFPRLFKEWGVTRLTFEYDSEPF  
GKERDAAIKLAKAEAGVEVVIENSHTLYDLDRIIELNGHKPPLTYKRFQAIISRME LPPKPVSTVMTQOMETC  
KVDIQENHDDVYGVPSLEELGFPTDGLAPAVWQGGETEALARLDKHLERKAWVANFERPRMNANSLASPTGL  
SPYLRFGCLSCRLFYRYRLWELYKKVKRNSTPPLSLYGQLLWREFFFYTAATNNPKFDRMEGNPICIQIPWDRNP  
EALAKWAEGKTGFPWIDAIMTQLRQEGWIHHLARHAVACFLTRGDLWISWESGVRVFEDELLLDADFSVNAGSW  
MWLSCSAFFQQFFHCYCPVGFGRRTPDPSGDYVKRYLPKLKGFPARYIYEPWNAPEVQKAAKCIIGVDYPKPM

VNHAETSRNLNIERMKQIYQQLSRYRGLCLLASVPSCVEDLSGPVADSASGQGCSTGTAMRLSQADQASPKRKH  
EGAEELCAEELYKRAKVTGLPAPEIPGKS  
>Rynchops\_nige\_\_NXN57093.1  
WFASKNKCFFTIPCRFLLQCLEDLDANLRKLNLSRLFVIRGQPADVFPRLFKEWNIAKLSIEYDSEPFGERDA  
AIKKLASEAGVEVIVRISHTLYDLDKIIELNGGQPPLTYKRFQTLISRMEPLEMPVETITPEVMEKCTTPVSD  
DHDEKYGVPSLEELGFDTDGLPSAVWPGGETEALTRLERHLERKACFKLLQAWVANFERPRMNANSLLASPTG  
LSPYLRFGCLSCRLFYFKLTDLYKKVKNSSPPLSLYGQLLWREFFYTAATNNPRFDKMEGNPICVQIPWDKN  
PEALAKWAEGRGTGFPWIDAIMTQLRQEGWIHHLARHAVACFLTRGDLWISWEEGMKVFEELLLDADWSVNAGS  
WMWLSCSSFFQQFFHCYCPVGFGRRTDPNGDIIRRYLPVLRGFPAKYIYDPWNAPESIQKAAKCIIGVNYPKP  
MVNHAETSRNLNIERMKQIYQQLSRYRGLGLLATVPSNPNGNGGMLMGYSPGETISGCGSTGGAQLGTGDGHT  
VVQPCALGDSHTGASGVQQQGYCQASSILHYAHGDNQQSHLLQAGRTTLGTGISAGKRPNPEEETQSVGPKVQ  
RQSTN  
>Rynchops\_nige\_\_NXN57354.1  
LLKVDYDVCSNYGNWLYSAGIGNDPRDNRKFNMVKQGLDYDSNGDYVRLWLPELQGIKGADIHTPWALNGAAL  
SQAGVTLGETYPPQPVVTAPEWSRHINQRPQGRSPHPRGRRGPAHTPTQHKDRGIDFYFSRKKDV  
>Saccharomyces\_cer\_GAX67612.1\_photolyase  
MKRTVISSSNAYASKRSRLDIEHDFEQYHSLNKKYYPRPITKTGANQFNNKSRAKPMEIVEKLQKKQKTSFEN  
VSTMHWFRNDLRLYDNVGLYKSVALFQQLRQKNAKAKLYAVYVINEDDWRAHMDSGWKLMFIMGALKNLQOS  
LAELHIPLLLWEFHTPKSTLSNSKEFVEFFKEKCMNVSSGTGTIITANIEYQTDELYRDIRLLENEDHRLQLK  
YYHDS CIVAPGLITTDRTNYSVFTPWYKKWVLYVNNNKKSTSKICHLHIIIEPLKYNETFELKPFQYSLPDEF  
LQYIPKSKWCLPDVSEEAALSRLKDFLGTKSSKYNNEKDMLYLGGTSGLSVYITTGRISTRILIVNQAFQSCNG  
QIMSKALKDNSSTQNFIEKVAWRDFYRHCMCNWPYTSMGMPYRLDTLDIKWENNPVAFEKWCTGNTGIPIVDA  
IMRKKLLTYGINNRSRMITASFLSKNLLIDWRWGERWFMKHLIDGDSSSNVGGWGFCSSTGIDAQPYFRVFN  
DIQAKKYDPQMIFVKQWVPELISSENKRPNYKPLVDLKHRSRKRALKVYKDAM  
>Sagittarius\_serp\_\_NXQ94764.1  
MQHSSIHWFRLRLHDNPALLAAADCRCLHPLFILDPSGRAGTNAWRFLLDALRDLDTLQEMGSRLFVV  
RGFP EEVFPFLFHAWGTTRLTFEVDTEPSALRRDAVAELAARHGVEVIKEVSHTLYDTERVLALNDGKAPLT  
YKHLQSLLASLGPEKPAVLTWEHLQGCCTPIQVSHD TDYGVPTLEELGQDPSKVGPPLYPGGETVALARLN  
ALMDRTDWCVSFKKPETEPTSLSPSTTVLSPYLKFGCLSVRTFWWRLEDEVYQGREHSQPPVSLHGQLLWREFF  
YTAGAGIPNFD RMVGNPICLQVNWDDNPQHLRAWKEGQTGYPFIDAIMTQLRTEGWIHHLARHAVACFLTRGD  
LWWSWEEGLKVFEELLLDADWSLNAGNWLWLSGSAFFHRYFHIYSPVAFGKKTDRDGAYIRKYLPI LKDFPAE  
YIYEPWKAPRAVQERAGCLVGTHYPQPIVEHGTVSKRNLGRMKVARTQK  
>Sagittarius\_serp\_\_NXQ99261.1  
RFLQSLLEDLNSLRKLNLSRLFVVRGQPTDVFPRLFKEWGVTRLTFEYDSEPFGERDAAIVKLAKEAGVEVV  
IENSHTLYDLDRIIELNGHKPPLTYKRFQAIISRMELPKKPVTIIISQMETCKVDIQENHDDVYGVPSLEEL  
GFPTDGLAPAVWQGETEALARLDKHLERKAWVANYERPRMNANSLLASPTGLSPYLRFGCLSCRLFYYRLWE  
LYKKVKRNSTPPLSLYGQLLWREFFYTAATNNPKFDRMEGNPICIQIPWDRNPEALAKWAEKGTGFPWIDAIM  
TQLRQEGWIHHLARHAVACFLTRGDLWISWESGVRVDFEELLDADFSVNAGSWMWLSCSAFFQQFFHCYCPVG  
FGRRTDP SGDYVKRYLPKLKGFPSRYIYEPWNAPESVQKAAKCIIGVDYPKPMVNHAETSRNLNIERMKQIYQQ  
LSRYRGLCLLASVPSCVEDLSGPVADSASGQGCINTAMRLSQADQASPKRKHEGAEELCTEELYKRAKVTGL  
PAPEIPGKS  
>Sagittarius\_serp\_\_NXR00476.1  
DNWAFLYAQRALAKQELPLHVCFCCLVPKFLDATIRHYGFMLRGLQEVAEECAELNIPFHLLPGYAKDVLPAFV  
VEHGVGGLVTDFCPLRLPRQWVEDVRERLPEDVPFAQVDAHNIVPCWVASPKQEYSARTIRGKIIHAQLPEFLT  
EFPFVIHHPYPSPCAEPIAWEACYSSLQVDRTVKEVEWATPGTAAGLAVLQSFIAERLKSFGSHRNNPNKAA  
LSNLS PWFHFGQVSTQRAILEVQKHRGKYKESVDTFVEEA VVRRELAENFCYYNENYDSVKGAYSWAQTTLKL  
HAKDKRPFLYELQELEQGTTHDPLWNAAQLMVWEGKMHGFLRMYWAKKILEWTRSP EEALQFAIYLNDRYEL  
DGRDPNGYVGKRCLWSICGIHDHGWTERAIFGKIRYMNYAGCKRKFDVGQFERRY  
>Sagittarius\_serp\_\_NXR00810.1  
FVLKVDVDFVCSNYGNWLYSAGIGNDPRDNRKFNMIKQGLDYDGNNGDYIRLWVPELQGIQGADIHTPWALNSAA  
LSQAGVTLGETYPPQPVVTAPEWSRHINQRPQGRSPHPRGRRGPAHTPMQHKDRGIDFYFSRKKDV  
>Sagittarius\_serp\_\_NXR01154.1  
MPHRTIHLFRKGLRLHDNPTLLAALESSEVIYPVYILDRKFMTSVMHIGTLRWHFLLQSLLEDLQRLNCQLGSC  
LLVIQGEYESVLRDHIRKWNITQVTLDAEMEFPYKEMEANIQRLGEELGFEVLSLVGHSLYDTRKILDLNGGT  
PPLTYKRFHLHILSLGDAVPVRNLTAEDFQRCRPPEPGLAECYRVPLPVDLKI PSESLSWRGGETEGLQRL  
EQHLTDQGWVASFTKPR TIPNSLLPSTTGLSPYFSMGCLSVRTFFYRLSNIYAQAKHSLPPVSLQGQLLWRE  
FFYTVASATPNFTKMAGNPICLQISWYEDAERLHKWKTAQTGFPWIDAIMTQLRQEGWIHHLARHAVACFLTR  
GDLWISWEEGMKVFEELLLDADYSINAGNWMWLSASAFFHQYTRIFCPVRFGKRTDPEGQYIRKYL PVLKNFP  
SKYIYEPWTATEDEQKQAGCIIIGQDYFPFPMVNHKEASDHNLQLMKQVREEQYRTAQLTRDDTDDPMEMKVKRD  
HSEENASKGAARMTE

>Salarias\_fasc\_\_XP\_029951737.1

MSPSVTSVQPVVRLDMLREVLVGREDPEGFFALCVSLMGHQETRSQFPVIRPLSTSNRGLHATLTSIYQEYFS  
KTEEDELELALALSRLSDNQQLSTSSQESQVMWPGKRNSCVSYQPQVSEPKSIENKCTQLADGLSGRNTCP  
AQTSQGQSNKSPSQTONPKENKAGEDEQMTREGDLNESQKAKRSRRRRQRQKGAGQQLVGLPSSPSASPPVLLW  
FRDLRLCDNPALIGSLELGAPVIPVFIWSPEEEEGPGITVAMGGACKYWLHQALSHFRTSLEGIGTRLVFFK  
ANGESHEAGSSRLILKKLVKETGAQTVLANALYEPWLKERDDAVASALQKEGVECLRFHSYCLRDPYSVSTEG  
VGLRGIGSVSHFMSCCKQNPSPVGVPLDPPASLPTPAHWPQGVALDTLELARMPPRKDGTIDWAANIRKSW  
DFSEEGA HARLDAFLHDGVYRYEKESGRADAPNTSCLSPYLHFGQLSPRWLLWDAKGARCRPPKFQKRLAWRD  
LAYWQLTLFPDLPWESLRPPYKALRWSSDRGHLKAWQGRGTGYPLVDAAMRQLWLTGWMNNYMRHVVASFLIA  
YLHLFPWQEGYRWFDTLVDADVAIDAMMWQNGGMCGLDHWNFVMHPVDAAMTCDPNGSYVKKWCPELAGLPDE  
LVHKPWKCPASMLRRAGVVFQGTYPRIILDLEERSQSLQDVALVRKQFGEYVDKRSgcdLVPLPPRLVSEA  
LGLSHRHGGVVTGKEFLLPVITRMEFKHQQEDPDADAASNPNYAVLKGYSRKRDETI AFLNERDFTASVMF  
EGAQRRELERLENNQRMEGLPLLAAPRGRARRTPAKDKFSIVPGGAVASLK

>Salarias\_fasc\_\_XP\_029952200.1

MAHTCIHWFRKGLRLHDNPALLAALRDCKVLYPLFIVDPDCTYGGNNRKRFLLGALKDLDCSLRKLNSRLFVV  
TGKPEEVFPKLFKEWNVTKLTYEYDTEPYSLNRDSKV TALAKEHGVFVYKVSHTLYDMDRIIEENNGKTPLT  
YKSFQGIKRLGPPKKPI PAPVLGDMKDVKTPCSEKHDEKYGIPTLEDVGVDTSLSEELFPGGEQEALRRLD  
EHMSRTGWVCNFEKQPOTSPNSLSPSTTVLSPYVAFGCL SARTFWWR LSDVYRGKKHSDPPVSLHGQLLWREFF  
YTASVGIPNPNKMGVGNHVCTQVDWDTNAEYLAAWREARTGFPFIDAIMTQLRREGWIHHLARHAVACFLTRGD  
LWISWEEGQKVFEDYLLDHDWALNAGNWQWLSASTFFHQFYRVYSPVAFGKKTDKRGDIKKYLPVLKKFPEQ  
YIYEPWKAPLSVQRAAGCIVGQDYPRPIVEHEVISKTNIQRMKQAYAKSSQNKSESPIKKTASSESPVKNKGV  
KRKMTSIADMLVKKKSKGEVS

>Salarias\_fasc\_\_XP\_029952233.1

MVVNTIHWFRKGLRLHDNPALRDSIRGAESLRICIYILDPWFAGSSNVGINRWRFL LQCLEDLDASLRKINSRL  
FVIRGQPTDVFPRLFKEWKIKRLSYEYDSEFPFGKERDAAIQKLASEAGVEVMVRISHTLYNLDKI IELNGGQP  
PLTYKRFQALINRMDPVELPVEITITFEVIKRLCTPISDDHDDKFGVPSLEELGFETEG LSTAVWPGGETEALM  
RLERHLERKAWVANFERPRMNANSLASPTGLSPYLRFGCLSCRLFYFKLTDLYRKVKKNSTPPLSLYGQLLW  
REFFYTATNNPCFDKMDGNPVCVQIPWDRNPEALAKWAEGRTGFPWIDAVMTQLRQEGWIHHLARHAVACFL  
TRGDLWISWEEGMKVFEELLLDADWSVNAGSWMWLSCSSFFQQFFHCYCPVGFGRRTPNGDYIRRYLPILRG  
FPAKYIYDPWTAPDEVQKTAKCIVGVHYPKPMVNHA EASRINIERMKQIYQQLSCYRGLGLLAMVPTNPNTA  
TGSSAAGGSAGASHGPGVSSSEDSSMQEGTSRTERGHSVQKRREETLPETSRSKSWKQGK

>Salarias\_fasc\_\_XP\_029952418.1

MVVNSVHWFRKCLRLHDNPALQAEALNGADTVRCVYILDPWFAGAANVGINRWRFLLEALEDL DSSLKKLNSRL  
FVVRGQPTDVFPRLIKENVTRLTFEYDPEPYGKERDGA I KMAQEFVGVETVIRNSHTLFNLDR I IEMNNNSP  
PLTFKRFQTI VSRLELPRRPLPTITQQQMDTCRTDIAADHDKLYSIPSLEELGMHHRFGFRTRGLAAAVWRGG  
ESEALDRLNKHLDDKKVWVANLEHPRVNTCSLYASPTGLSPYLRFGCLSCRVLYYNLRELYMKLRKRSSPPLSL  
FGQLLWREFFYTAATNNPNFDHMQGNPICVQIPWDQNPEALAKWAEGRTGFPWIDAIMTQLRQEGWIHHLARH  
AVACFLTRGDLWLSWESGMKVFEELLLDADWSVNAGSWMWLSCSAFFQQFFHCYCPVGFGRRTPDPTGDI RRY  
VPVLKDYPTRYIYEPWNAPECVQKAANCLGVHYPKPMINHAEGSR LNIERMKQVYQQLSHYRGLSLLASVPT  
IQEEAEPPMTDESQNGSGPDSPGAALADHQAPGCPAAPDSSSRPAPPPPPACRPPPDAAAAAAPSCSFRHNVLL  
PAPAPAAAASSRRKGFSRKPRRSYRPRAARAGGPPPPPPPRDEQRRDRRREQRVEEKMEQEDEEEEEEEEEPE  
EHMEEEGEELRQ

>Salarias\_fasc\_\_XP\_029955718.1

MSTSRTIICLLRNDLRLHDNELFHWQRNAEYIVPLYCFDPRHYVGTYNFNLPK TGPFRLLHFLLSIKDLRNT  
LRSKGSNLVVRGKPEEVVADLIKQLGVS SVAFHEEVTSEELNVEKRVKEVCARMKVKVHTCWGSTLYHRDD  
LPFHHSRLPDVYTQFRKAVETQSRVRPVFPTPETLNLPLPGLEEGDIPTAADLEQPEPVADSRSAFPCSGGE  
SPALERLKHYFWDTNLVASYKETRNGLIGVDYSTKFAPW LAMGCISPRYIYHQIQQYERERTANQSTYWVIFE  
LLWRDYFKFVAVKYGNRLFQIKGLQDKHVPWKLDMKLFD AWKEGRTGVPPFDANMRELAMTGFM SNRGRQNVA  
SFLT KDLGLDWRLGAEWFEYLLIDYDVCSNYGNWLYSAGIGNDPRENRKFNMIKQGLDYDNNGDYVRQWVPEL  
QRIRGGDVHTPWALSSAALSHA EVSLGETYPAPVVVAPEWNRHFNKKPSGVGPSARGKKGPSHTPKQHRDRGI  
DFYFSKSKNL

>Salarias\_fasc\_\_XP\_029970321.1

MLRGATRSSSFALFLKTGSSSALRSLITPTMSDKKRKSTSSSSGEQPGAKQQKREKKERSRGWLRSELQQQRA  
DNKDMKFNEKRLRFISEARKVKQGSEGVLYWMWRDQRVQDNWALIHAQRLAVEESLPLHICFLTVPESPLST  
LRHYSFLLKGLEEVSKECRPLDIQFHLLRGAPGEVLP GFVSDRGFGAVVTD FSPLREAVQWLQDVRKALPEDL  
PLIQVDAHNVP PCWVASAKLEYAARTIRGKITKLLPEFLTD FPPVEKHPHTAARTAKAVDWAEMLASLPVDRT  
VGEPEWAEPGAQAGLAMLESFMDERLPLFGAQ RNDPNVAALSQ LSPWIRFGQLSAQRAALQVQRGGKSAGQSV  
GPFLEELVVRRELTDNFCFYNQYDSVEGAYEWAQKTLKD HAKDKRPYLYTREQLENAKTHDKLWNAAQYQMT  
SEGKMHGFLRMYWAKKILEWTPSPEEALSIALYLNDRYELDGQDPNGVVGCMWSICGVHDQGWAE RVPVFGKIR  
YMNYKGCLRKFNVAQFERKYCPKTA

>Salmonella\_ent\_GAS74637.1\_photolyase

MTTHLVWFRDLRLHDNLALAAACDRRSAQVLALYIATPEQWKAHDMAPRQAAFTCAQLNALQTALAEKGIPL  
LFHEVADFAASVDIVKSVCLQHDSRLFYNYQYEINERQRDANVEKSLPQVVCEGFDDSVILPPGAVMTGNHE  
MYKVFTPFKNAWLKRIKDGIPECVSAPKVRESGALDAPLTPTITLSYPQQDFDAQRFVADEKLAIQAQLRQFCQQ  
AAGEYEQQRDFPAIDGTSRLSASLATGGLSPRQCLNRLLAEQPQALEGGSGSVWLNELIWREFYRHLMTYHPA  
LCRYQPFIRWTDREVQWQNDPAHLQAWQMGQTGYPIVDAAMRQLNATGWMHNRRLMITASFLVKDLLIDWRKGE  
QYFMSQLIDGDLAANNGGWQWAASTGTDAAPYFRIFNPTTQGEKFD RDGEFIRQWLPELRDVPGKTIHDPWSW  
AEKAQVTNLNYPPIVDHKKARLATLAAYEAEARKE

>Salpingoeca\_ros\_XP\_004989008.1\_cry\_DASH

MSSSSSKAVRPAVVWFRGSDLRIDHEPLLEAAKASKGHVVPVYCFDPRQVGPAAKTRCGQFPKCGWQRTRFI  
VECVEDLRRNLQRLGSNLVVRVGEPEEVIPIDIVSITGATEVFGQKEVCSEETGVEHRLAKRLSVPLTLRWGAI  
TLCHRDDLPERSCSDLPGVFSQFRKAAEACVPIRPPRPPPSLQPLPQPIAGDPGHVPPVTQLSPNAPAKAD  
ERGVLTFFVGGETVARTRVKHYLWDTDICIATYKDTRNGLVGADYSSKFSPLAHGCVSARWIHSEVKRYERERV  
KNNSTYWLVFELLWRDYFRFVALQHGTAFKEGGVQQRKGIAWRHSPLDLSAWQEGRTGFPFVDANMRELAATG  
FMSNRGRQNVASFLTCKDLLIDWRLGAEFESLLIDHDPICANYGNWNYAAGIGNDPRQGRHFNVIRQAKTYDPA  
AEYVHLWVPELKHLPAPFAHTPYQAPHGELEAAGVALEKSYPRPIVASLDNGRIPIRGGAAMYSAGKPFKGP  
KWMMDRDGQEGSNTSDGGGRSRSGKRRGRHNRKPRVQGGWS

>Salpingoeca\_ros\_XP\_004994459.1\_DNA\_photol

MGLPSGGEGFLMERVRAITPTQELREGGKCVVYWMSRDQRAKDNWALLYARSLARSARVPLVVVFSLVPKFLD  
ATIRHYGFMLRGLHQTAKHLHEKLVPFHLLQGSAAATVPFAAAQHEAAVICDMSPLRVPLRWVKDVQGALEA  
QNVPLLQVDAHNIVPVWVTSQKQEYAARTIRPKIHKHLDTYLQFPPELDANDKDTLGDMELPVPVFDLEAQFDM  
LEVDTSVKEVDWIEPGYEQGMMAAEAFGRDRAKKFDELNNPNEDVCSNLSPIYFHFQGISAAAVVLLLSKYS  
KKAAGKVQTFIEEAVVRRELSDNFCFYNNRYDSIDGAAVWARDTLTDTHRHDKREYVYTREQLEQGKTHDDLWN  
AAQLQMVVERGKMHGFLRMYWAKKILEWTATPEDALQTALFLNDRYELDGRDPNGYVGCMMWSIAGIHDQGWAE  
AVFGKIRYMNYKGCKRKFVAVRFSRFPQAVANAAEVNGQASSQPTLKQASSRSKRGAAGAGANTAKRAKTS  
A

>Salpingoeca\_ros\_XP\_004995002.1\_DNA\_photol

MSGGAVSIHWFRKGLRLHDNAALLAALKGAKQVYPVFLDPHFAPKPEFVGVRYNFLLESRLDLKSLRTLGS  
RLYVLKGKPLQALEEKFEKEVTRLTFRDTEPYAKLRDTQARELAEKHGIEVITTVGHTLHDPEQYIAKAGG  
ADKIPLTYSSFGTLFRRLGKVPAAALSAPTKEDEFQSSSTLVRTDALDDHRFDVPSLKDMGYEWNDDHEVRFPG  
GETEALERMRRHLQRKAWIAHFEKPKTSPNTLEPSTTGLSPYLKFGCLSPRLFYHELARVYAEYRDHAKPPVS  
LHGQLLWREFFHMCYAVKNFDRMEGNRICRQIDWDTDNDALLAAWENARTGYPWIDACMTQLRREGWLHHLAR  
HAVACFLTRGDLYQSWEKGAQVFDRLLDADWHLNSANWMLSCSSFFYQYFRVYSPVAFGKKTDPGAYIRK  
YLPQLKAFDPKYIYEPWKAPPGVQRSCGCIIGKDYPEPIVDHAEVSAANKARIRACYDALKQAEKAKKTTTKD  
AKSSGGASKRSSAQSSAKLKKTKTASSKR

>Salvelinus\_alpi\_XP\_023826479.1

MPVSGGEDPMSQVRQMLRELLVGRENAEGFFCLCVSVLGHNDTRTHFLPLIQLLATDHNSLHTTLTSIYLEYF  
SKDEDDLAVALALSLLEVKGQQQTDTKPLFPDPKLGQQTDTQATATYRPQNSSIQSQSVSPNGSSSQPPAP  
LPKGASYAQLAAVGRRQTQAQHQDSTSPRRSSGHGSSPQTERQRGPTQTDIMWSNVTQDVCASIATSLTSNL  
NQAKDDITVVECEVDQSEKPKRSKNRRQRKGYGQQVVGMPRCPSAPPPVLLWFRDLRLHDNPAVIGSLAAG  
GPVIVPFIWCPEEEEGPGVTVMGGACKFWLHQALSCLSSALEHIGSHLVFLRTDEEREGIGSSLLALRSIVR  
ETGAQTVLASALYEPWLRERDQVVVSALQKDRVEVNMVHSYCLRDPTYTVTTEGVGLRGIGSVSHFMSCCQMN  
GPGLGVPLDPPISLPSVWPRGCPLEGLGLARMPCRKDGTIDWAANIRSSWDFSEEGAQSRLEAFNDGVY  
RYEKESGRADAXNTSCLSPYLHFGQLSARWLLWDTKGARCRPPKFIRKLAWRDLAYWQLTLFPDLPWESLRPP  
YKALRWSNERGHLKAWQKGRGTGYPLVDAAMRQLWLTGWMNNYMRHVVASFLIAYLHLPWQEGYRWFQDTLVDA  
DVAIDAMMWQNGGMCGLDHWNFVMHPVDAAMTCDPYGSYVRKWCPELAVLPDDLHKPKPCASMLRRAGVVL  
GQSYPECVVTDLERRSQSLQDVALVRRRFGEYVDPCSGCDLVPLPRLVSEAMGGGMVNTGGQFLLPVITRM  
EFKHQSDPDADAASNPNYAVLKGYSRRRNETIAFLNQTDFTASVINEGAERRERQERDQRRMEGLPRPLAA  
QGRGKRTPAAKDRFSTVPGGVATSHR

>Salvelinus\_alpi\_XP\_023841416.1

MVGNTIHWFRKGLRLHDNPSLKESIRGADTLRCVYILDWPWFAGSSNVGISRWRFLLQCLEDLDASLRKLNSRL  
FVIRGQPTDVFPRFLQEWQTRQLSYEYDSEFPFGKERDAAIQKLASEAGVEVTVKVSHTLYDLDKIIELNQQS  
PLTYKRFQALISHMDAVESPAETITAEMVRKCATPISDDHDDKFAVPSLEELGFETEGLATAVWPGGETEALT  
RLESHLERKAWANFERPRMNANSLASPTGLSPYLRFGLSCRLFYFKLTDLYRKVKKNSSPPLSLYGQLLW  
REFFYTATNNPRFDKMEGNPVCVQIPWDXNPEALAKWAEGRGTGFPWIDAIMTQLRQEGWIHHLARHAVACFL  
TRGDLWISWEEGMKVFEELLLDADWSVNAGSWMWLSCSSFFQQFFHCYCPVGFGRRTDPNGDYIRRYLPILKA  
FPAKYIFDPWNAPESVQKAAKCVIGMHYPKPIVHHTEASRINIQRMTQIYQQLSCYRGLGLLATVPANPNNGG  
NGVGTSPPEEQHEAGKGKAGRGHAAVKRSNEDLTPGGSNKAQRQTSN

>Salvelinus\_alpi\_XP\_023841829.1

MVVNSVHWFRKGLRLHDNPALQEALNGADTVRCVYILDPWFAGSANVGINRWRFLLESLEDLDSSLRKLESRL  
FVVRGQPANVFPSPFLKEWNVTRLTFEYDSEPYGKERDGAIIKMAQEFVETIVRNSHTLYNLDRIVEMNNGSP  
PLTFKRFQALVNRLELPMKPLPTITQEOMGSCRTKIADNHDEHYSVPSLEELGFKTQGLDPAVWKGGESEALE  
RLNKHLDRAKAWASFERARINMCSLIASPTGLSPYLRFGCLSCRVFYINLRELYMKLRKNCSPPLSLFGQLLW  
REFFYAAGTNNPNFDRMEGNPICVQIPWDHNPEALAKWAEGSTGFPPWIDAIMTQLRQEGWIHHLARHAVACFL  
TRGDLWISWESGMRVFEELLLDADWSVNAGSWRWLSCSSFFQQFFHCYCPVGFGRRTDPSGDYIRRYIPKPKD  
YPNRYIYEPWRAPESVQKAANCIVGVDYPKPMINHTEGSRLNIERMKQVYQQLSHYRGLSLLASVPTIQEEAE  
PPPTDDSQASSSTCESPPHTSSAQSNLTKRGRPSEPQSTQTCTHTKHQHTSTAKGDQERQQEQWEEQSEHQPV  
DLQ

>Salvelinus\_alpi\_\_XP\_023866165.1

MHRSLLLIPASKHIWKVFTLESQRHCSFTKLVLSSINNRTTMPAEKRKATFAKMDSTKKQKLQAVKEGKGER  
EEXWLQGVVAKQRKDKDLKFNKKRLRFLSQTQKIKQGSEGVVYWMNRDHRVQDNWALIYAQQALALEEKLPLHI  
CFCLVITQNPELATIRHFGFMLRGLEEVAKDCSALDIQFHLLQGSAGELLPGFVEDWRFQAVVTDIFSPLRTP  
QWVEEVKKGLPSDIPFIQVDAHNVPVCWVASDKLEYSARTIRNKITKLLXEFLTEIPLVDKHPHTALRTAKPV  
DWAEALSSLEVXDXTVEEVDWAKSGSAAGIAMLESFIDLRLKNFATQRNNPNSSAVSQLSPWIRFGHLSAQRRV  
LQVKCCGKSAGESVSSFTEELVVRRELTDNFCFYNPYSYDSVKGANDWAQKTLKDHXKDPRPYVYTREQLEKAQ  
THDKLWNAAQYQMVIEGKMHGFLRMWAKKILEWTSSPEGALSIAIYLNDRYELDGQDPNGFVGCMMWSICGVH  
DQGWAERPFIKIRYMNYKGCTRKFDVAQFERKYCPKDL

>Salvelinus\_alpi\_\_XP\_023867825.1

MAHTCIHWFRKGLRLHDNPALVAALRXCKEIYPVFLDPCAXNNVNIGINRWKFLIGALKDLDCSLRKLNSRL  
FVVRGNPEEVFPKLFQKWKVTRLTYEYDTEPFSLRRDKEVVRLAEAHGVEIIYKVSHTLYNIDRIIEENNGKA  
PLTYNRLQTLVSSIGPPKRPIPAPTSDDMKDVKTPCSEKHEENYGISTLEKLYQDPESLTEELFPGGEQEALR  
RLDQHMERKEWVCDFEKPQTSPLNSPSTTVLSPYMTFGCLSVRTFWWSLTDVYQGGKHSQPPVSLHGQLLWR  
EFFYTAGLGIPNFDKMEGNPVCTQVDWDSNSEYLAAWAEARTGFPFIDAIMTQLRQEGWIHHLARHAVACFLT  
RGDLWISWEEGQRVFEELLLDXDWSLNAGNWQWLSASTFFHQFFRVYSPIAFGKKTDKNGDYIKKYLPHLKKY  
PAQYIYEPWKAAPRSVQEAAGCIVGKDYPRPIVEHEVISKKNIQRMKAAYAKRSPHSSDESPPSKKEKGLFPLGT  
AIGSASPPLTLTIV

>Salvelinus\_alpi\_\_XP\_024000180.1

MSTSRTVICLLRNDLRLHDNEVFHWAQRNAEHIVPLYCFDPPGHYLGTYNYNLPRTGPFRLRFLLDISIQDLRTS  
LIQRGSTLVVRRGRPEEVVGDLIKQLGSVSVAFAHEEVVPEDQQVERGVDRDICSQMKVKVHTCWGSTLYHRDD  
LPFNHLSRLPDVYTQFRKAVETQGRVRPVLPTVDQLKPLPLSGLDEGPXPEDLEQTDTVRDRSAXPCSGG  
ETQALARLQHYFWDTDAVATYKETRNLGLDYSTKFSPLAIGCISPRYIYQYQIKKYESERTANQSTYWVVF  
ELLWRDYFKFVGAKYGARLFDIKGLQDKSIPWKKDMNLFNAWKEGRTGVFPVDANMRELALTGFMSNRGRQNV  
ASFLTCKDLGLDWRMGAEFHYLLVDNDVTRSNGWLYXAGIGNDPRENKFNMIKQGLD

>Sander\_luci\_\_XP\_031137844.1

MSTARIICLLRNDLRLHDNELFHWAQRNAELIVPLYCFDPRHYVGTNYNLPKTGPFRLRFLLESIRDLRNT  
LLNKGSNLVVRQGKPEEVVAELLKQLGSVSTVAFHEEVTSEELNVEKRVKDVCAQMKVKVHTCWGSTLYHRED  
LPFHHISRLPDVYTQFRKAVETQSRVRPLFPNPEQLKPLPQGLEGAIPAEADLEQTEPVADPRSAFPCSGGE  
SQALARLKHYFWDTDAVATYKETRNLGLTGVGYSTKFAPWLAAGCISPRYIYHQQYERERTANQSTYWVIFE  
LLWRDYFKFVGKYGKGNRLFQIKGLQDKSVPWKKDMKLFNAWKEGQTGVFPVDANMRELAMTGFMSNRGRQNV  
SFLTCKDLGLDWRMGAEFHYLLIDHDVCSNYGNWLYSAGIGNDPRENKFNMIKQGLDYDNNGDYVRLWVPEL  
QGIRGADVHTPWTLSASLSHAHVSLGETYPAPIVTAPEWSRHVNKKPNGTGPSPRGKKGPSQTPKQHRDRGI  
DFYFSRSKNL

>Sander\_luci\_\_XP\_031138961.1

MVVNTIHWFRKGLRLHDNPSLRDSIRDADTLRCVYILDPWFAGSSNVGINRWRFLLCLELDASLRKLNSRL  
FVIRGQPTDVFPFPMFKEWQINHLSEYDSEPFGERDAAIQKLASEAGVEVTVRTAHTLYNLDKIIELNDGQS  
PLTYKRFQALINRMDAVELPADTITSDVIKNCATPISEHHDDKFGVPSLEELGFETEGLTAVWPGGETEAL  
RLERHLERKAWVANFERPHMNANSLSSPTGLSPYLRFGCLSCRLFYFKLDDLYRKVKKNSTPPLSLYGQLLW  
REFFYTATNNPCFDKMEGNPVCVLI PWDRNPEALAKWAEGRGTFPPWIDAIMTQLRQEGWIHHLARHAVACFL  
TRGDLWVSWEEGMKVFEELLLDADWSVNAGSWMWLSCSSFFQQFFHCYCPVGFGRRTDPNGDYIRRYLPILRG  
FPAKYIYDPWNAPEEVQKAAKCIIGVHYPGPIVNHAEASRINIERMKQIYQQLSSYRGLGLLATVPANPNNGA  
NGSNVRGVNKGTSQGGSSDGIFKYPLTSRTERGQKRRCEEAPTQSNCKSWRKS

>Sander\_luci\_\_XP\_031150246.1

MLHCLWRSSSFSSAPRLLRLVTHSNHRPTSVFSSPSKSFTSQTIMSDKKRKSTSSAAAGGKEPSAKQKQKLAP  
MKEEEKKERVEGWLQDLVKQQRTEKKEMKFNKKRLRFSMSDTEQAKQGSEGVLYWMLRDHRVQDNWALVQAQRL  
ALEENLPLHICVCLVVPKSELSTLRHYSFMLKGLKEVAKECKTLDIQFHLLHGSAGDVLPGFVSDRGLGTVV  
DFSPLREPLQWLEDVKKTLPKDIPLIQVDAHNIVPCWVASPKLEYAARTIRGKITKLLPEFLTEFPLVEKHPY  
TATRTAKPVDWDKILASLQVDRAVGEPEWAKPGTNGGMAMLESFIDVRLKLFDTQRNDPNAAALSQSPWIRF  
GHLSAQRRVALQVQHSAGSVSSFIEELVVRRELTDNFCFYNNKYDCVEGAYEWAQKTLKDHAADKRPYLY

TREQLEKAKTHDKLWNGAQYQMVTEGKMHGFLRMYWAKKILEWTSSPEEALSIALYLNDRYELDGQDPNGFVG  
CMWSICGIHDQGWREAVFGKIRYMNYKGCLRKFDVARFERKYCPKNL

>Sander\_luci\_\_XP\_031153688.1

MVVNSVHWFRKGLRLHDNPVLQEALNGADTVRCVYILDPWFAGAANVGINRWRFLLEALEDLDSSSLKKLNSRL  
FVVRGQPTDVLPRLFKEWKVTRLTFEYDPEPYGKERDGAIIKMAQEFVETIVRNAHTLYNLDRIEEEANNNSP  
PLTFKRQFTIVSRLELPRRPLLPITQQQMENCRTIADNHDQLYSIPSLEELGFRTVGLPPAVWRGGETEALD  
RLNKHLDKKVWVANFEHPRVNTCSLYASPTGLSPYLRFGCLSCRVLYYNLRELYMKLRKHCSPPLSLFGQLLW  
REFFYTAATNNPNFDRMEGNPICVQIPWDQNPEALAKWAEGRGTGFPWIDAIMTQLRQEGWIHHLARHAVACFL  
TRGDLWISWESGMKVFEELLLDADWSVNAGSWMWLSCSAFFQQFFHCYCPVGFGRRTDPSGDYIRRYIPILKD  
YPNRYIYEPWNAPEVQKAAKCVGVDPKPKMINHAEGSRLNIERMKQVYQQLSHYRGLSLLASVPTIQEEAE  
PPMTDESRTSSGPDSPPKGPADSEAADCSSTVCAFSSTYSPPDLEGATNSHPSQTPCAYSVSHTQPSA  
AITSASASQALSTAAPPSPASTPTQSSLSRFKPSPPSSSCPTMSPSLSPAMTMTQHSFSGQKRKGLVSKVRCI  
QRQGRQSCPTPAAGEVERRAEKKEREEAGLEERMEQDVEQDEERMEEETAGHQQ

>Sander\_luci\_\_XP\_031170258.1

MAHTCIHWFRKGLRLHDNPALMAALRDCKELYPVFILDPYLHNNTCVGINRWRFLVGLVDLDCSLRKLNSRL  
FVVRGKPEEVFPKLFDKWKVTKLTIEYDTEPYSLSRDKTVTTLAKEHGVEVIYKISHTLYDIDRIIEENNGKA  
PLTYNRMRAIVKTLGPPKRPIPAIPIMQDTKDVKTPCSENNEELKKYGIPMLEELGQDTAALGQEQFPGGEQEA  
LRLRDEHMQRGTGWVCGFEKPQTSPLSLSPSTTVLSPYVTFGCLSARTFWWRLTDVYRGKKHSDPPVSLHGQLL  
WREFFYTASVGIPNFDKMEGNPVCTQVDWDTNPDYLAAREARTGFPFIDAIMTQLRQEGWIHHLARHAVACF  
LTRGDLWISWEEGQKVFEELLLDGDWALNAGNWQWLSASAFFHQFFRVYSPVAFGKKTDKNGDYIKKYLPLLK  
KFPAQYIYEPWKAAPRSIQQAAGCIVGQDYPHPIVQHDVISKKNIQRMKLAYAKRADPAESPSNKGQVKRKAPS  
VIDMMKKKDRKK

>Sander\_luci\_\_XP\_035858845.1

MPHSVAAAEDSKALVRKTLREVLVGREDPEGFFAMCVSALGHQETRSQFLSLIQPLSTATNSSLHSILTSIYR  
GYFSKTEDDELELALALSLEMKDHQLSTPSQQSRLQQPGDRPNQRCVQLNSVSQPQGS SHAQLADVENTNS  
PQTGAWVKAGPPQTTRETEPQKSTHVDEYKSETPGTSQTVCVSRLSGLFSKQDTEEGDQMMDEGDLNQIEKL  
KRSKKRRQRCKGAGQQVGLPCSPSAPPVLLWLRRDLXLGDNPALIGSLEVGA PVIPLFIWSPDEEEGPGIT  
VAMGGSCKYWLHQALSCFSSSLQSIGSHLVFLKANGSSRLTLKELVKETGARTVLATALYEPWLKDMDDVVVS  
ALQKHGVECRMIHSYCLRDPYSVSTEGVGLRGIGSVSHFMSCCRQNP GSVLGFPDPSGSLPTPAHWPQGVSL  
GTLGLARMPRRKDGTIDWAANIRKSWDFSEEGACAQLEAFLDWCVDMKESGRADAPNTSCLSPYLHFGQLSP  
RWLLWDAKEARCRPPKFQORKLAWRDLAYWQLTLFPDLPWESLRPPYKDLRWSSDLGHLKAWQQGRTGYPLVDA  
AMRQLWLTGWMNMYMRHVVASFLIAYLYLPWQEGYRWFQDTLMDADVAIDAMKWQNGGMCGLDHNWFVMHPVDA  
AMTCDPYASYVRKWCPELADLPDELIIHKPWKCPASMLXRAGVVFQGTYP ERIVTDLRERRSRSLQEVALLVRXE  
YGRYVDKCTGCDLVPLPPRLVSEALGLSHRDGGVVTEGKQFLLPVITXHAPS NPNYNAV LKGYMSCKRRDDNIAF  
LNERDKCDVXGSSEKGERLERDYCRIEGLPQPPAPQGRARRTPTSKDRFSIVPGGAVSSLR

>Saprolegnia\_dic\_XP\_008613356.1\_SDRG\_09216

MKLVDLAVAGVKAERLRWLHGSAALSSGSHVLYWMQTSRLTRYNYALHVMAAAATTLQKPLYVLYTLDTHEAG  
MSERHMAFLLES LYDVNKS LQQTHHVPFSAVHCASGSSGPLDVVLAASRNASLVVTELQYLRSGRKLCTTFGE  
QATAPVVQVESDVVVPVEVASNKEEYAARTLRPKITKHLPTYIVSLPSIAYAPPSAPKSLQELQALS LSTHD  
TWLDLTDASAVDTLLATAKD VDRSIPRVSTFLGGETSAQSVLTTFLSQKLLKYGTERNEPSGN GASNLSPYLH  
YGNISPVDIALQVNATEGRGPAMAASKASFLEELIVRRELSMNFVWFNPRHYDSIKSLPPFATETLAIHADDA  
RATYISEAQLDTAMTHDAYWNAAQLDMIVNGKMQNYMRMYWGKKILEWTASPEEAYEICIRLNDKYNLDGYDP  
NSYTGIAWVFGKHDTGWAERAIFGKVRYMNADGLKRKYDMQAYVNMIRHQCAAAMTLQPKQLALECTKPKAK  
RQKKA

>Sarcophilus\_harrisii\_XP\_031794408.1\_cryptochro

MGVNAVHWFRKGLRLHDNPALKECIEGADTVRCVYILDPWFAGSSNVGINRWRFLQLCEDLDANLRKLNSRL  
FVIRGQPADVFPRLFKAWNIAKLSIEYDSEPF GKERDAAIKKLASEAGVEVIVRISHTLYDLDKIIELNGGQP  
PLTYKRQFTLISKMEPLATPVETITPEVMLKCVTPLSDEHDEKYGVPSLEELGFDTDGLPSAVWPGGETEALT  
RLERHLERKAWVANFERPRMNANSLASPTGLSPYLRFGCLSCRFLFYFKLTDLYKKVKNSSPPLSLYGQLLW  
REFFYTAATNNPNFDRMEGNPICVQIPWDRNPEALAKWAEGRGTGFPWIDAIMTQLRQEGWIHHLARHAVACFL  
TRGDLWISWEEGMKVFEELLLDADWSINAGSWMWLSCSSFFQQFFHCYCPVGFGRRTDPNGDYIRRYLPVLRG  
FPAKYIYDPWNAPEGIQKVAKCLIGVNYPKPMVNHAESRLNIERMKQIYQQLSRYRGLGLLASVPSNPNGNG  
GLMGYTSGENGPACNSGGGAPVGASDGQILQSCALPEPPAGASCIQQSDI

>Sarcophilus\_harrisii\_XP\_031799863.1\_cryptochro

MAATAVVTVTAAAPAPAPAPAPAEAGASSVHWFRKGLRLHDNPALQAALRGARCVRCVYILDPWFAASSSVG  
INRWRFLQLSLEDLDISLRKLNSRLFVVRGQPTDVFPRLFKEWAVTRLTFEYDSEPFGRERDAAIVKMAKEAG  
VEVVTENSHTLYDLDRIEEELNQKPPLTYKRQAIISRMELPRKPVSGVTRQQMERCQAEIREDHDEAYGVPS  
LEELGFPTDGLGPAVWQGGETEALARLDKHLERKAWVANYERPRMNATSLASPTGLSPYLRFGCLSCRFLFY  
RLWELYKKVKRNNTPPLSLYGQLLWREFFYTAATNNPKFDRMEGNPICIQIPWDRNPEALAKWAEKGTGFPWI  
DAIMTQLRQEGWIHHLARHAVACFLTRGDLWVSWESGVRVFEDELLDADFVNAGSWMWLSCSAFFQQFFHCY

CPVGFGRRTDPSGDYVRRYLPQLKGFPSRYIYEPWNAPE SVQKAAKCIIGVDYPKPMVNHAETSRLNIERMKQ  
IYQQLSRYRGLCLLASVPSCMEDLSSPMVEASVGQ PGLSSAGPKVPPCPPASPKRKHETPDEACGGEHGKRAR  
VMVAVPGPELVGRDV

>Sarcoptes\_sca\_KAF7493271.1\_Deoxyribod

MSNLVILQNDLRLHDNPALYYAAQEDLP IIVVYVIEKRIGTAALWWLTKSLTNFRERLQ EYGIELLSVFDRNQ  
FPDLIDY LQKDL SIEIKKIFSN GIDFDLPD KSLEKI HESLMPNNIYDFSKLPKEHKVFTPFWKFLQEKFEPEL  
PVDDPKFSKSNKTMIQFDRFQEI PYEKTREDLDSHWKTGEKAALEQYRNFVKSRLVNYDVERDYFSRDGTSKL  
SPHLRFGEISARKIYHDLKKNSRNKRFLSELGWREFGYQTYFFHPKMDSIPLNPKYANFFPKYNEDHLIAWKN  
GTTGYPVIDAAMRQLKHTGWMHNRLRMVVASFLTKNLLIPWQQGEQFFYDCLVDGDRALNPMNWQWVAGCGFD  
SVPYFRIFNPSLQGEKFDS DGT FVRYWVEELKNVSKSFNIYKDYEKIPSKSYPKPIINYSKSRIRALETLKNV  
VNPKVVKVQKRSHKEEDSDED

>Scatophagus\_argu\_XP\_046227599.1

MSASRTVICLLRNDLRLHDNELFYWAQRNAEYIVPLYCFDPRHYVGTYNYNLPKTGPFRLRFLLESISDLRDT  
LLKKGSNLVVRRGKPEEVVADLIKHLGSVS AVAFHEEVTSEELTVEKQVKDVCAQLKVKVHTCWGSTLYHRDD  
LPFHHMSRLPDVYTQFRKAVETQSSVRPVIPTPEQLKPLPQGLEEGSIPTAEDLHQTEPVTDP RSAPFPCSGGE  
SHALARLKHYFWD TDAVATYKETRNGLIGVNYSTKFAPWLALGCVSPRYIYHQIKQYERERTANQSTYWVIFE  
LLWRDYFKFVGKYG NRLFQVKGLQDKSV PWKNDMKLFNAWQEGRTGVPFVDANMRELALTGFMSNRGRQNV  
SFLT KDLGLDWRMGAEWFEYLLIDYDVCSNYGNWLYSAGIGNDPRENKFNMIKQGLDYDNNGDYVRQWVPEL  
QGIGADVHTPWT LSTAALSHARVSLGETYPTPVVIAPEWSRHVNKKPMGPGPSPRGKKGPSHTPKQHRNRGI  
DFYFSRSKDL

>Scatophagus\_argu\_XP\_046237517.1

MTHTCVHWFRLRLHDNPALMAALRDCKELYPVFI LDPNLHNDARVGINRWRFLIGALKDLDCSLRKLNSRL  
FVVRGTPEDVFPKLFNKWKVTKLTYEYDTEPHSLSRDKTVTTLAKKNGVEVIYKISHTLYDIDRVIEENNGKA  
PLAYNRMQAIVKTLGPPKRPI PAPT MENMKGVMTPCSENQDEKYGIPTLEELNLKTAGLGEEQYPGGEQEALR  
RLDEHMKRKEWVCSFEKPQTS PNSLNPSTTVLSPYVTFGCLSARTFWWRLTDVYHGKKHSDPPVSLHGQLLWR  
EFFYTASVGIPNFNMEDNSVCTQVDWDTNPEYLA AWREARTGFPFIDA IMTQLRQEGWIHHLARHAVACFLT  
RGDLWISWEEGQKVFEELLLDGDWALNAGNWQWLSASAFFHQYFRVYSPVAFGKKTDKNGDYIKKYLPTLKKF  
PAEYIYEPWKAPRSIQQAAGCIVGKDYPRPIVQHEVISKKNIQRMKSAYAKRSAHIAESPNNKKQGVKRKAPSV  
LDMPKIKMRNK

>Scatophagus\_argu\_XP\_046248946.1

MPPSVAGGAEDSKALVRKMLREVLVGREDPEGFFAMCVSALGHQETR SKFLSLIQPLSTANISLHSNLT SIYK  
EYFSESEDELELALALS LLET KDDQLSTPSRQSKLKRNPARTSLPQTQGGSH TQSADVDSRVKNISSLRDG  
PWVKLSTPQITGEASLQGT AHIEYNKETPGTSQTVHVSTLPGSIFKQEMGEEGEQMMDEGHSDQSENKRKSKN  
RRQRRRGASQQVVG LPCSPSALPPVLLWFRDLRLCDNPALTGSLELGAPVPIPIFIWSPEEEEGPGITVAMGG  
ACKYWLHQALSCFCSSLEHIGSHLVFFKATGQGNEVGSSLCILKGLVKETGARTVL ANALYEPWLKERDDAVV  
SALQKHGVECRMFSYCLRDPYTVSTEGVGLRGIGSVSHFMSCCRQNP GSALGVPLDPPVSLPTPAHWPOGVS  
LDTLGLARMPRRKDGT TIDWAANIRKSWDFSEEGA HARLEAFLHDGVRYEYESGRADAPNTSCLSPYLHFGQ  
LSPRWLLWDAKGARCP PKFQ RKLAWRDLAYWQLTLFPDLPWESLRPPYKALRWSSDRGHLKAWQRGRTGYPL  
VDAAMRQLWLTGWMNNYMRHVVASFLIAYLHLPWQEGYRWFQDTLVDADVAIDAMMWQNGGMCGLDHWNFVMH  
PVDAAMTCDPYGSYVRKWCPELS DLPDEL IHKPWKCPASMLRRAGVVFGQTYPERIVTDLEERSQS LRDVAL  
VRKEFGQYVDKRS GCDLVPLPPRLVSEALGLSHRDGSVVTAGKQFLLPVITRMEFKHQLDDPDGDAATNPYNA  
VLKGYVSRKRDDTIAFLNERDFTASVMYEGTQRRERLES DYRRIEGLPRPPAPRGRARRTP TAKDRFSIVPGG  
TVTSLR

>Scatophagus\_argu\_XP\_046250340.1

MVVNTIHWFRKGLRLHDNP SLRDSIQGADTLRCIYILDPWFAGSSNVGINRWRFL LQCLEDLDASLRKLNSRL  
FVIRGQPTDVFPRLFKQWKITHLSYEYDSEFPFGKERDAAIQKLACEAGVEVIVRISHTLYNLAKI IELNDGHP  
PLTYKRFQALISHMDAVELPAETITLKVIKKCTTPI SEDHDDKFGVPSLEELSFDTEGLTTAVWPGGETEALV  
RLERHLERKAWVANSELPRMNANSLASPTGLGPYLRFGCLSCRLFYFKLTDLYRKVKKNNT PPLSLYGQLLW  
REFFYTATNNPCFDKMEGNPVCVQIPWDRNPEALAKWAEQGTFGPWIDA IMTQLRQEGWIHHLARHAVACFL  
TRGDLWISWEEGMKVFEEL LIDADWSVNAGSWMWLSCSSFFQQFFHCYCPVGFGRRADPNGDYIRHYMPILRG  
FPAKYIYDPWNAPEEVQKAAKCIIGVHYPKPMVNHAESRINIERMKQIYQQLSRYKGLGLLATVPVNPNSGI  
NGSNVGRVNTGTSQVPGGSCENPSTQDGTSPQAERGPFPPQKRRCVEAPLESSSKCWKQ GK

>Scatophagus\_argu\_XP\_046250381.1

MVVNSVHWFRLRLHDNPALQEALNGADTLRCVYILDPWFAGAANVGINRWRFLLEALEDLDS LKKLNSRL  
FVVKGQPTDVFPRLLEKWKVTRLTFEYDPEPYGKERDGAIIKMAQEFGVETIVRNSHTLYNLDR IEMNNNSP  
PLTFKRQFTIVSRLELPRRPLPITKQQMDKCQTKIADNHDQLYSIPSLEELGFRTEGLPPAVWRGGESEALD  
RLNKHLDKKVWVTNFEHPRVNTCSLYASPTGLSPYLRFGCLSCRVLYYNLRELYMKLRKRCSPPLSLFGQLLW  
REFFYTAATNNPNFDRMEGNPICVQIPWDQNPEALAKWAEGR TGFPWIDA IMTQLRQEGWIHHLARHAVACFL  
TRGDLWISWESGMKVFEELLLDADWSVNAGSWMWLSCSAFFQQFFHCYCPVGFGRRTDPSGDYIRHYIPILKD  
YPNRYIYEPWNAPE SVQKAANC VGVDPKPMINHAEGSRLNIERMKQVYQQLSHYRGLSLLASVPTIQEEAE

PPMTDESQTSSGPDSPPRGPADSEAAGCSTAPDSSTVCPSSSTYAPQPDLEDTADNYLSQTTSSCSRSQPSAAI  
TSTSAPPFSAQSPVSRKPSPPSSSCLTSSSSSLSPATTPPTPTQASSLGQRRKGLARKVRRSQRRGRQSCTPA  
AREGDRRSEEDEREVEGEDERMEEDAEQDDERMEEETSGQAAGSQQ

>Scatophagus\_argu\_\_XP\_046263365.1

MLHYIWRNSSFFFTPGSFLRLIAHSKQKPISSCLSKSLTSQTIMSGKKRKATSAAKESSAKQQKLAPMKEEKG  
EKKERAGGDEEMEFNTRKLRFI SDTEKMKQSGSEGVLYWMFRDHRVQDNWALIHAQQQLAVKEHLPLHVCVCLLV  
PKSELSTLRHYSFMMKGLEEVAKCKTLDIQFHLLHGSAGEVLPGFVTTHSLGAVVTDFSPLEPLQWLEDVK  
KKLPKDIPLMQVDAHNI VPCWVASPKLEYAARTIRGKITKVLPEFLTDFPLVEKHPYKATR TAKPVDWDKTLD  
SLQIDRSVGEPQWAKPGTKAGMAMLESFIDVRLKLFDTQRNNPNVAALSQ LSPWIRFGHLSAQRVALQVQVRS  
KKTGLSVSSFIEELVVRRELTDFNFCFYNNKYDSVEGAYEWAQKTLKDHAKDERPIYITREQLEKAKTHDKLWN  
AAQYQMVTEGKMHGFLRMYWAKKILEWTSSPKEALSIALYLNDRYELDGQDPNGFV GCMWSICGIHDQGWAE  
RPIFGKIRYMNYKGCLRKFDPVQFERKYCPKNP

>Schistocephalus\_soli\_\_VDL96751.1

SSLRVVSEQGWLGESSVYLFTNGPYAQIISIYEAPRRATHTHDSSTVVVRGPPYAPRKGAETDPDWKSIEA  
SVLGHLDES VKAIKWAQGGSRHGFRELFTFLHERLALYATARNPTKNALSQ LSPWFHFGFEFFLPHAYLPKFH  
REWTPATCHLSVQRAILEAQRLRRKHKESVDAFIEEAFVRRELSDNFCLYNPHYDSIEGAWSWAQETLCKHAS  
DERKPAYAMETMEKAQTGDDLWNAAQRLLETKIHGFLRMYWAKKILEWHAGGPEAALAVGLRLNDRYSIDG  
SDPNGFVVGAAASDAIGSTKPLPTATDELGVMMWSICGIHDQWSERAIFGKIRYMNYAGCKRKFNIAQFVARY  
PS

>Schistocephalus\_soli\_\_VDL97200.1

MLAAWTEARTGFPFIDAAMTQLNRHGWMMHLLARHAVACFLTRGQLWQSWTDGAAVFQSLLLDADWALNSANWM  
WLSASAFFHQYYRVYCPVGFGRKTDPEGKFIRHFLPCLKNMPKQYIYAPWTAPLAVQKKAGCVIGVDYPVPIV  
DHQEMRAANLVKMKAA YDACRKFAPSSANKGTDTEHNPSNKKTDTPHYPSNRKTDTSPTKLGRLLT DKSQASK  
RRKL

>Schistocerca\_gre\_QVD39239.1\_cry\_2

MCAKTTQEHTVHWFRGLRLHDNP SLRAGLIGATTFRCIFILDPWFAGSSNVGINKWRFL LQCLEDLDSSLRK  
LNSRLFVIRGQPADALPKLFKEWGTNLTFEEDPEPF GKVRDQ NIMAMCREMGISVISIASHTLYSLDTIIEK  
NGGKAPLTYHQFQNI VASMDSPPPAEPSITPACVKDKFTPI SDDHDERFGVPTLEELGFDTDGLMPPVWQGG  
SEALARLERHLERKAWVASFGRPRMTSQSLLASQTGLSPYLRF GCLSTRLFYYQLTDLYKKIKKACPPLSLHG  
QLLWREFFYCAATKNPYFDKMYGNPICVQIPWDRNPEALAKWATGQTGYPWIDA IMIQLREEGWIHYLARHAV  
ACFLTRGDLWISWEEGMKV FDEL LLDADWSVNAGMWMWLS CSSFFQ QFFHCYCPVRFRKADPNGDFIRKYLP  
ILKNFPTRYIHEPWKAPESVQITAKCIIGKEFPLPIVDHQYASRINIERMKQVYQQLSKYRGPGLLATVPTIR  
SPSVKGCQYDSKEDKTTPENRIVSANNDCSMYVETQQQMT PQETKCDWEFCRRNM

>Schistocerca\_gre\_QVD39240.1\_cry\_2

MAKGVAIHWFRLGLRIHDNPALLEAISACYNENLELCPVFVLDPWIIKKLRVGPNRWRFLQQTLCDL DANLRK  
IGTRLYVLRGTPEETF KDKFQEWNVKVITFETDIEPYARERDERVIKIAETAGARVVQKVSHTLYDPEHIVQK  
NMGKPPLTYQKLLSLVDNIGPPEKPVNSPSKLSERITLNSVKIDHNHCVPTLIELGVNEKLLKPTIFPGGES  
AALDRNLKMKNKEWVRKFEKPNTSPNSLEPSTTVLSPYLKFGCL SARTFYYKLKEVIGTSPHTKPPVSLLGQ  
LLWREFYVVA AETPNFDKMVGNPICQVPWNKNEEHLAAWAEGRTGYPFIDA IMIQLRTEGWIHHL SRHAVA  
CFLTRGDLWISWEDGQKVFEELLLDADWALNAGNWMWLSASAFFHQFFRVYSPVAFGKKT DKLGEYIKKYVPV  
LRKYPPEYIYEPWKAPLSVQKQAGCVIGEDYPKRIVIHEDVYKINISKMSEAYKRWKGA KSKQEDKISNTVKN  
KKMKIT

>Schistosoma\_man\_XP\_018648974.1\_putative\_D

MAVLAETVHEWLDGIHNKRLSTASSAENFKFHKSRIRHLSGPGTFPEKDDGFGQG GVLVWMSRDQRVQGNAIQ  
GYTFFVFLVLLISKEIIFIAQPEDISSGCKHRWSDENALFNQTDRIEKNFLYETYVAKSVVDLAKLLNVGCLV  
TDFCPLRAPRSWVKVTDLPDNI PFCEVDAHNI VPVWCGSEKREYSARTIRSKLFQQSPKFLTDFPPIIKHT  
CSDKITVLP PPVNWESILSDYVGDKSVK PVDWAVPGTQAGLEVLYEFISKRLKKFDPHRNDPAHPALSGLSPW  
LHFGQIAPQRAVLEVAVQKHFGRSADIFIEECFNRRELAENFCFHTPFYDSIKGAYDWARESLMTHSTD KRD  
PAYSKTQMETAQTGDDLWNAAQRLVLKGMHWFLRQYWAKKILEWCAEGPESAIQIAIYLNDRYSLDGTDPN  
GYVGIMWAICGVHDQGWPERPIFGKIRYMNYKGCLRKFSVSTFVSRYPEKLD

>Scleropages\_XP\_018619474.1\_cryptochro

MVVNSVHWFRLGLRLHDNPALQEALKGADTLRCVYVLDPFAGSANVG VNRWRFLLESLEDLDA CLRKLNSRL  
FVVRGQPADVFPRLFKEWGVTRLTFEYDSEPYGKERDAAI IKMAQEFGVETVVKKSH TLYDLDR IEMNNSSP  
PLTFKRFQAI VNRGLPRKPLPTVTRQQMDGCWTDVSMNHDERFGVPTLEELGFKTQELSPAVWKGGETEAL  
RLKKHLDRKAWVANFERPQINVCSLMASPTGLSPYLRF GCLSCRLFYELRDLYLKVRKHSSPPLSLFGQLLW  
REFFYTAATNNPNFDRMEGNPICVQIPWDHNPEALAKWAEGRTGFPWIDA IMTQLRQEGWIHHLARHAVACFL  
TRGDLWLSWESGMRVFEELLLDADWSVNAGSWMWLSCSA FFQQFFHCYCPVGFGRRTDP SGDYIRKYIPKLRD  
YPNRYIYEPWNAPESVQKAVNCVGVDPYPRMINHAEVSRLNIERMKQVYQQLSHYKGLSLLASVPTIQEEAE  
LPRSDDSQSHNSSDVQSDEPSKKASLGKRERPSELQRPPACTQPKVQRRSTAEGSSSKQQY

>Scleropages\_for\_XP\_018586555.2\_photolyase

MPGRRKQPAGKRGAEPAERPPEGGKRRREEGWMAQVAELRAAERAQPFNEKRLRFLSESRKVKQGSQGVLYW  
MCRDQQRVQDNWALIYAQRLARTEKLPLHVCFLSPRFLEATVRQMGFMLNGLKEVEKECSTLEIQFHLLLGAA  
GEVLPGFVKDRRMGAVVTDFFLRLPLQWAEDVKKGLPSDVPFIQVDAHNVVPCWVASDKQEYSARTIRGKIT  
KLLPEFLTEFPLVEKHPRCAPVLAKPVDWDKAWSSLEVDRSVGEVEWARPGSTAAMATLESFVDQRLQDFAAH  
RNNPNREALSQLSPWLHSGQVSAQVRVLQVKRNGPRGPSVDAFVEEAVVRRELADNFCYYNKDYDCVDGAYEW  
AQKTLRDHAKDPRPHLYSRKQLEEAKTGDRWLWNAQIQLVKEGKTHGFLRMYWAKKILEWMPSPPEALSTALY  
LNDRYSLDGNDPNGYVGCMMWSICGIHDQGWQERPVFGKIRYMNYAGCKRKFDVPAFERRYCSVKL

>Scleropages\_for\_XP\_018586695.2

MRHNSVHWFRKGLRLHDNPALQAALRDCAELYPVFVLDPWFPKNARVGITRWRFLIGALADLDCSLRRLNSRL  
FVVRGKPEEVFPRFLQKWKVTRLTTFEVDTEPYALQORDKNIASLAAEHQVEVIQEVSHSTLYDTERIILENNGKA  
PLTFKRMQTLINTVGAPKRPCPPPTLQDMIDICTPSSSEDHEEAYGVPSLAELGFDSLNAGPELYPGGEQEALR  
RLEEHSRTGWVCAFEKQPOTSPNALTPSTTVLSPYLKFGCLSARTFWWRLLDDVYRGRKHSEPPVSLHGQLLWR  
EFFYTTSVGIPNFDGCMVGNPVCVQVDWETNPEYLAAWREGRTGFPFIDAIMTQLRQEGWIHHLARHAVACFLT  
RGDLWISWEEGMKVFEELLLDADWALNAGNWQWLSASAFFQQYFRVYSPVAFGKKTDKNGDYIRKYLPIILKKF  
PAEYIYEPWKSPRSRLQERAGCIVGKDYPKPIVEHEVISKKNIQRMKMAYAKHSGSSSESSGSKSKEKRKVGSV  
LDMLTKKNTKLD

>Scleropages\_for\_XP\_018606994.1\_cry\_DASH-1

MCSAPHTVICLLRNDLRLHDNEVFHWAQKNARYIVPLYCFDPRNYLVTFCYNLPKTGPFRLRFLLDLSKDLRA  
TLQKKGSNLFVRQGKPAEVISELIKQLESVSTVIFHEEVTHEELEVEKEIRNVCSQLKVKVHSCWGSTLYHRD  
DLPFSSHISRLPDVYTQFRKAVETQGEVRPVLSTPDMLKPPFAGLEEGSIPALKDLGQTDVLEDPRSAFPYHGG  
ESQALARLQHYFWDTDAVARYKETRNLIGVNYSTKFAPWLANGCISPRFIHDQIKKYERERGANQSTYVWIF  
ELLWRDFFRFVAMKHGKNIKIFSLNGLQDKALPWKKDISLFNAWKEGRTGVFPVDANMRELAQTGFMSNRGRQNV  
ASFFTKDLGLDWRMGAEWFEYLLVDYDVCNSYGNWLYSAGIGNDPRENKRFNVIKQGLDYDNNGDYVRQWVPE  
LQGISGCKVHTPWTLSKDVLSKGQVTLDKTYPPFVVMASEWSHHANQNMVDVSGPGPRGRRLSHTPKHYGNRG  
IDFYFSRNKNLK

>Scleropages\_for\_XP\_018610422.2

MVVNTIHWFRKGLRLHDNPSSLKESIQQADTVRCVYIILDPWFAGSSNVGISRWRFLQLCLEDLDASLRKLNSRL  
FVIRGQPTDVFPRFLFKESIKRLSYEYDSEFPFGKERDAAIRKLASEAGVEVVVRISHTLYDLDKIIELNNGQS  
PLTYKRFQTLISRMEAVETPVESITAEMVGKCTTPVFDDHDDKFGVPSLEELGFNTEGLSSAVWPGETEALT  
RLERHLERKAWVANFERPRMNSNLLASPTGLSPYLRFGLSCRLFYFKLTDLYKKVKKNSSPPLSLYGQLLW  
REFFYTAATNNPRFDKMEGNPICVQIPWDRNPEALAKWAEGRGTGFPWIDAIMTQLRQEGWIHHLARHAVACFL  
TRGDLWISWEEGMKVFEELLLDADWSVNAGSWMWLSCSSFFQQFFHCYCPVGFGRRTPNGDYIRRYLPILRG  
FPAKYIYDPWNAPESVQKSAKCMIGVHYPKPMVNHAEEASRLNIERMKQIYQQLSCYRGLGLLATVPSNPSGNS  
EAAGNMVGLPHGEAAQDLSLGTIGHQV PANLVGDWSGAVMAHPQGESKPGGSTQQQRRGHHTSTMTTVKRPSD  
STPGVVFKVQRQNSN

>Scleropages\_for\_XP\_029109379.1\_uncharacte

MMPATDSSRPAAHVSRVQAMVTQVLLGTMEPEELFWGSLSLGLQGTQDTFLDLIEPLAQEHAEVHHTLTSVF  
LDYFTRAKEDEALALALALSQDAGAGKQMTTEESSGSRSDVKCTRITLWLEANASAGPRDGWSSSSTQCSD  
LEHQHNLQPQSMGTGAGTTGKSNSMSERANSCLLPCTDNKNVPEEVTASCPGRAKSSRRKRRSGKQQLAISRF  
PSFLKPILLWFRDLRVSDNPVLIASLEMGVPIIPVFLWCPEEEGPGITVATGGASKYWLHALLCLNQSL  
KLGSLLVTVEAETSSLEALQGLAAETGASGVVAAALYEPWLKERDEAVFSALESKGVKQQLRHSYCLREPSSI  
STEGVGLRGIGSVSHFLSCCQQNSKSALGTPVETPPGLPVPSTWTPQGCPLAQLGLAKMPRRKDGTTVDWAANI  
RSSWDFSEEGAQARLRAFLLDGIHRYEKESCRADAPNTSCLSPYLHFGQISPRLLLWASRSATCRPPKFRRL  
AWRDLAYWQLCLFPDLPWQSLRPAYRALRWSSDRTHLKAWQKGRGTGYPLVDAAMRQLWLGTGMNNYMRHVVAS  
FLIAYLHLPWQEGYRWFDTLVDADVAIDAMMWQNGGMCGLDHNFMHPVSAGLTCDPRGTFAARRWCPELAA  
LPDELVHRPWKSPASMLRRAGVTLGVNYPRIITDLEERRAQSLRDVVRVRNFPQYVDQLSGCDLVPLPQRL  
VQEALGSGEVADRGRFLLPLITRMEFKYQTQNPDCRDNPFDAVLKGYVSRKRDEATAFRNERDFAASVLS  
VQRRERQEREQALDGI PRPATGRPGRTPRKDVFSAGGAGFTLLHN

>Scleropages\_for\_XP\_029114945.1

MTGKHGESGTSTKTHKTIHLFRKGLRLHDNPVLWALESSRVVYPVYVLDRIFLLEGALRTGALRWRFLQLSLE  
DLHIQLAVLGSRLYVVGQRFEAVLRHLIAKWGITQLTFDVEVEPFYARLDEDLGAMGKELGLSIHTCVAHTLY  
NVSRIVEVNGGHPLTYKKFLQVLSTMGEPPDRPAREITAQDFLNCPTPVDASEEFVPSLEDFGIVVESEVLW  
PGGESHALKRLEKHFESQGWVANFSKPRTIIPNSLLPSTTGLSPYLSLGCLSVRTFYHRLSNIYAQSKNHSPLP  
VSLQGQVLWREFFCTVASATPNFTCMAGNPICLQIGWYEDTEALKKWRTAQTGFPWIDAIMTQLQEGWIHHL  
ARHAVACFLTRGDLWISWEEGMKVFEYLLDADYSVNAGNMMWLSASAFFHQYTRIFCPVRFGRRTPDQGYI  
RRYLKVLQNFPSRYIYEPWTAPLEVQVEAGCVIGRDYPLPMVSHSEVSQKNLALMAQVRREQASTAQLTRDVT  
DDPEVMGMKREHVEDQGFDRDGISEQPERPCKRLSPEGDCPVTPCSWSHDGLSLPKLSGEVM

>Scophthalmus\_maxi\_\_AWP20602.1

MSTSRTVICLLRNDLRLHDNELFHWQRNAEKIVPLYCFDPRHYVGTHNYNLPKTGPFRLRFLLESVRDLRDT  
LLAKGSNLVVRGKPEDVVAELIKQLGVSSTVAFHEEVTSEELHVEKKVKEICAQMRVKVHTCWGSTLYHRDD

LPFHMSRLPDVYTQFRKAVETQSKVRPVFPAPPEQLKPLPPGLEEGAIPMAQDLQQTEPLTDPRSAFPCSGGE  
SQALARLKHYFWDTDVAVATYKETRNLIGVDYSTKFAPWLANGCISPRYIYHQIQQYERERTANQSTYWVIFE  
LLWRDYFKFVGKYGYNRLFQVQGLQDKSVPWKKDMKLFDAWKEGRTGVPFVDANMRELAMTGFMSSNRGRQNV  
SFLTKDLGLDWRMGAEWFEYMLIDHDVCSNYGNWLYSAGIGNDPRENKFNMIKQGLDYSNGDYVRQWIPEL  
QGISGADAHTPWTLSPAVLSHARISLSETYPTPIVTAPEWSRVNKKPSGSGSPRGKKGPSHTPKQHRDRGI  
DFYFSRSKNL

>Scophthalmus\_maxi\_\_KAF0041381.1

MVVNTVHWFRKGLRLHDNP SLRDSIRASDTLRVYIILDPWFAGSSNVGINRWRFLLQCLEDLDASLRKLNSRL  
FVIRGQPTDVFPRLFKEWQVSRLSYEYDSEPFQKERD GALRKLAD EAGVEVMVRISHTLYDLDKI IELNAGQP  
PLTYKRFQVLLTCMDAVDLPTETITSEVIKKCTTPIVADHDDKFGVPSLEELGFETEGLTAVWPGETEALV  
RLERHLERKAWVANFERPRMNATSLMASPTGLSPYLRFGCLSCRLFYFKLTDLYKKMKKNSTPPLSLYGQLLW  
REFFYTATANNPCFDMEGNPMCVQIPWDRNPEALSKWVEGQTGF PWIDA IMTQLRQEGWIHHLARHAVACFL  
TRGDLWIRWEEGMKVFEELLLDADWSVNAGNMMWLS CSSSFFQQFFHCYCPVGFGRRTDPNGEYIRRYLPILRG  
FPAKYIYDPWNAPEEVQKAAKCIIGVQYPKPMVNHA EASRANIERMRQIYQQLSSYRGLGLLATVPANPNNGA  
GGSNVAGVNTGTGHGSGESSEELSIREGMPRTERSQSTQKRQREEEPSKSGSKSGRQSK

>Scophthalmus\_maxi\_\_XP\_035484982.1

MAHTCIHWFRKGLRLHDNPALLAALRDCEELYPVFLLDPHLHNDARMGINRWRF LAGALRDLDCSLRKLNSRL  
FVVRGRPEDVFPALFDKWRVTKLTYEYDTEPYSLSRDKTVTALAEHGVVEVVKISHTLYDTERI I EENNGKA  
PLTYNRMQAI VKSLGPPKKVPAP TMEVMAEAKTPCEDHEKKYGIPALEELGQGAAALSEEQFP GGEGEALR  
RLDEHMQR TGWVCNFEKPQTSPNSLSPSTTVLSPYVTFGCL SARTFWWRLTDVYQ GKHS DPPVSLHGQLLWR  
EFFYTASAGIPNFNKMVGNPVCTQVDWDTNSEYLA AWREAQTGF PFIDA IMTQLRQEGWIHHLARHAVACFLT  
RGDLWISWEEGQKVFEELLLDGDWALNAGNWQWLSASTFFHQYFRVYSPVAFGKKT DKN GDYIKKYLPLLKKF  
PAQYIYEPWKAPRSIQQAAGCIVGKDYPHPIVQHEVISKKNIQRMKLAYAKRSTDDTESPSKKQGT KRKTPSV  
VDMLKKKERRK

>Scophthalmus\_maxi\_\_XP\_035491623.1

MFCIWRRRKVVLTLP PPPRSPRSLAARRVP PRRGDSSSSSLSTGQLHLGPPLTCE DVMMSGKKRTAKSAPAGKQP  
AAKLRSAPTKEEEEKVERAGGWLQDLVMQORSKEKEMKFNKKRLRVISDAEKMKPGSEGVLYWMSRDQRVQD  
N WALIRAQKLAVKEDLPLHVCFCLSAPKSELSTLRHYGFMLKGLEEVAEECKALDIQFHLLHGSAGEVLP GFV  
ADRS LGAVTDF SPLKEPLQWLEDVKKALPNHIPLIQVDAHNVP C WVASPKLEYSARTIRGKITNHLPEFLT  
DLPLVEKHPHTATRTAKPIDWDKTLASLQIDRAVSEPQWATPGTKGGMAMLESFIDVRLKLFSGQRNDPNANA  
LSNLSPWIRFGHLSAQRV ALQVQRNGKHASQSVPPFIEELVVRRELT DNYCFYNKKYGSLEGAYEWAQKTLRD  
HANDERPFLYTRQQL EEAQTHDKLWNAAQYQMVSEGKMHGFLRMYWAKKILEWMSSPEEALSTALYLND RYSL  
DGQDPNGFVGCMWSICGIHDQGWAERAVFGKIRYMNKYGCTRKFDVPRFERKFCPKNPPK

>Scophthalmus\_maxi\_\_XP\_035497736.1

MPRPVVDADDSKASVRKWLREVLAGREDPEGFFAMCVSVLGHQETRSQFQSLIQPLSAANRSLHAALTSVYQG  
YFHKTEDDELELALALSTLEMKDHQLSTPGTESRLQQPGDTPSQSSSVHLNSVSQPQGSSHTQQADVRGQRKK  
KHLAQ TGPWGMVCPPIQITQETELQKSTNVDKGGKGTGTGSQSAYVSRPPASFSTQKTVLKSDQTMEEGDLNRT  
EKPKR SRNRKRREGGGQQVVGLPSSPSAPS P VLLWFRDLRLCDNPALIGSLEV GAPVIPVFIWSP EEEEGP  
GITVAMGGACKYWLHQALSCFRSSLECIGSHLIFLKANGEGHGVSSSLHTLRELKETGARTVLANALYEPWL  
KERDDVVVSALQEVGVQCKVFHSYCLRDPYSVSTEGVGLRGIGSVSHFMSCCRQNP GSALGVPLEPPGSLPTP  
AHWPQGVCLDNLELARM PRRKDGTMDWAFNIRKSWDFSEEGA HARLEAFLHDGVYRYEKESGRADAPNTSSL  
SPYLHFGQLSPRWLLWDAKGARCRPPKFQRK LAWRD LAYWQLTLFPDLPWESLRPPYKNLRWSNDRGHLKAWQ  
RGRTGYPLVDAAMRQLWLTGWMNNYMRHVVASFLIAYLHLPWQDGYRWFQDTLLDADVAIDAMMWQNGGMCGL  
DHWNFVMHPTDAAMTCDPYGSYVRKWCPELADLPDELIHKPWKCPASMLRRAGVVF GQTYPDRIITDLEERRS  
RSLQDVALVRKEFGQFVDKRTGCDLVPLPRLVSEALGSSSHRNGGVAAEAKQFLLPVITRMEFKHQLED PDAD  
AASNPNYAVLKGYSVRKRDETI AFLNERDFTASVMYEGTQRKERLES DYRRMEGLPTPPAPQGRARRTPKAKD  
KFSLVPGGVVTS LR

>Scophthalmus\_maxi\_\_XP\_035499212.1

MVVNSVHWFRKCLRLHDNPGLQEALNGADTVRCVYIILDPWFAGAA NVGINRWRFLL EAELEDLNSLKKLNSRL  
FVIRGQPTDVFPRLFKEWKVTRFSFEYDPEPYGKERDGAIIKMAQEF GVEPVVRNSHTLYNLDR IEMNNNSP  
PLTFKRFQTI VSRLELPRRPLPPVTQQQMDQCRTKISDNHDQLYSIPSLEELGFRTAGLPAAVFRGGESEALD  
RLNKHLDDKKVWANFEHPRVNTCSLYASPTGLSPYLRFGCLSCRVLYYNLRELYMKLRKRCSPPLSLFGQLLW  
REFFYTAAATNNPNFDRMDGNPICVQIPWDQNPEALAKWAEGR TGFPWIDA IMTQLRQEGWIHHLARHAVACFL  
TRGDMWISWESGMKVFEELLLDADWSVNAGSMMWLS CSSA FFQQFFHCYCPVGFGRRTDP SGDYIRRYIPVLKD  
FPNRYIYEPWNAPE SVQKAANC VVG VNYPKPMINHAESSRLNIERMKQVYQQLSHYRGLSLLASVPTIQEEAE  
PPMTDESQTSSGPGSPLGDEFDTEAAPDSSTVEVCASSTFVSHPELNDPLTLCASSGSQQPPTPPAPLHSAAP  
LSPTSPSALT P PPSMSKPSPLSSSSSSCPAMSPAPSPAAGVLAHQTFPKRKGVARKMRRSISQRQARLGGG  
APSGREEVGGDERMEEETSGYQQ

>Scopus\_umbr\_\_NXX54069.1

YCKTVWFASGNKCFFTTPCRFLLQCLEDLDANLRKLNLSRLFVIRGQPADVFPRLFKEWNIAKLSIEYDSEPF  
KERDAAIKKLASEAGVEVIVRISHTLYDLDKIIELNGGQPPLTYKRFQTLISRMEPLEMPVETITPEVMEKCT  
TPVSDDHDEKYGVPSLEELGFDTDGLPSAVWPGGETEALTRLERHLERKAWVANFERPRMNANSLASPTGLS  
PYLRFGLCLSCRLFYFKLTDLYKKVKKNSSPPLSLYGQLLWREFFYTAATNNPRFDKMEGNPICVQIPWDKNPE  
ALAKWAEGRGTGFPWIDAIMTQLRQEGWIHHLARHAVACFLTRGDLWISWEEGMKVL

>Scopus\_umbr\_\_NXX55203.1

MPHRTIHLFRKGLRLHDNPALLAALESSEVVYPVYILDRKFMTSVMHIGALRWHFLLQSLEDLQKNLCQLGSC  
LLVIQGEYKSVLRDHIQKWNITQVTLDAAEMEPFYKEMEANIRRLGEELGFVLSLVGHSLYDTRKILDLNGGT  
PPLTYKRFHLHLSLLGDPEVPVRNLTAEDFQRCRPPDPGLAECYRVPLPVDLKIPIESLSPWRGGESEGLRRL  
EQHLTDQGWVASFTKPRITPNSLLPSTTGLSPYFSMGCLSVRTFFYRLSNIYAQAKHSLPPVSLQGQLLWRE  
FFYTVAATPNFTKMAGNPICLQISWYEDAERLHKWKTAAQTGFPPWIDAIMTQLRQEGWIHHLARHAVACFLTR  
GDLWISWEEGMKVFEELLLDADYSINAGNWMWLSASAFFHQYTRIFCPVLFQKRTDPEGQYIRKYLPIKKNFP  
SKYIYEPWTASEEEQKQAGCVIGQDYPFPMVNHKEASDRNLQLMKRVREEQYRTAQLTRDDTDDPMEMKVKHD  
HSEENVSKGKVARMT

>Scopus\_umbr\_\_NXX59662.1

MQHSSIHWFRKGLRLHDNPALLAAATDCRHLHPLFILDPSRGRAGPNARRFLLDALRDLGSLREMGSRFLV  
RGRPEEVFPRLFHAWGTMRLTFEVDTEPPARQRDAVAELAARHGVEVIREVSHTLYDTERVLALNDGKAPLT  
YKRLQSLLASLGPPEKPAPALTWEHLRGCRTPCQVRHDADYGVLTLEELGQDPAEVGPHLYPGGETAALARLD  
TLMERTAWVCSFKKPETEPTSLSPSTTVLSPYLKFGCLSVRTFWWRLAEVYQGREHSRPPVSLHGQLLWREFF  
YTAGAGIPNFDPMVGNPVCLQVDWDDNPQHLRAWREGQTYGPFIDAIMTQLRAEGWIHHLARHAVACFLTRGD  
LWVSWEEGLKVFEELLLDADWSLNAGNWLWLSGSAFFHRYFHVYSPVTFGKKTDRDGAYIRKYLPLVKDFPAE  
YIYEPWKAPRAVQERAGCLVGTHYPRPIVEHRAASERNLGRMKAAR

>Scopus\_umbr\_\_NXX62443.1

RFLQLSLEDLNSLRKLNLSRLFVVRGQPTDVFPRLFKEWGVTRLTFEYDSEPFGERDAAIVKLAKAGVEV  
IENSHTLYDLDRIIELNGHKPPLTYKRFQAIISRMEPLPKPVSTVMSQQMETCKVDIQENHDDVYGVPSLEEL  
GFPTDGLAPAVWQGETEALARLDKHLERKAWVANYERPRMNANSLASPTGLSPYLRFGCLSCRLFYRLWE  
LYKKVKRNSTPPLSLYGQLLWREFFYTAATNNPKFDRMEGNPICIQIPWDRNPEALAKWAEKGTGFPPWIDAI  
TQLRQEGWIHHLARHAVACFLTRGDLWISWESGVRVDFELLLDADFSVNAGSWMWLSCSAFFQQFFHCYCPVG  
FGRRTDPSGDYVKRYLPKLGKGFPSRYIYEPWNAPESVQKAAKCIIGVDYPKPMVNHAEISRLNIERMKQIYQQ  
LSRYRGLCLLASVPSCAEDLSGPVTDVSVSGQGCSTSTAVRLSQADQASPKRKHEGAEELCTEELYKRAKVA  
CLPAPEIPGKSL

>Scopus\_umbr\_\_NXX63304.1

DNWAFLYAQRALALKQELPLHVCFCCLVPKFLDATIRHYGFMLRGLQGVAEECAELNIPFHLLGYAKDVLPAFV  
AEHGAGGLVTDFCPLRLPRQWVEDVRERLPEDVPFAQVDAHNIVPCWVTSKQEYSARTIRGKIHAQLPEFLT  
EFPFVIHHPPSPCAEPIAWEACYSSLQVDHTVKEVEWATPGTAAGLAVLQSFITERLKSFGSHRNDPNKAA  
LSNLSPWFFHFGQVSTQRAILEVQKHRGKYKESVDAFVEEAVRRELAENFCYYNENYDSVQAYDWAQTTLKL  
HAKDKRPFLYELQELEQGTTHDPLWNAQLQMVREGKMHGFLRMWAKKILEWTRSPPEALRFAYLNDRYEL  
DGTDPNGYPTLSPCPAGCLWSICGIHDQGAERAIFGKIRYMNYAGCKRKFDVQGQFERRYAPTC

>Scopus\_umbr\_\_NXX63934.1

GEKIHQGLAQLFLFLSSSVLKVDYDVCSNYGNWLYSAGIGNDPRDNRKFNMIKQGLDYDGNGDYVRLWVPELQ  
DIKGADIHTPWVNLNSAALSQAGVTLGETYPQPVVTAPEWSRHITQRPQGRSPHPRGRGPGRTPMQHKDRGID  
FYFSRKKDV

>Scyliorhinus\_cani\_\_XP\_038636618.1

MGGHSIHWFRKGLRLHDNPALLDALLGSDTIRCVYIVDPWFAGSSSVGINRWRFLQCLEDLDASLRKLNLSRL  
FVVRGQPADVFPRLFKEWKISRITFEYDSEPFSEKERDAAIKKLAIEAGVEVIVQISHTLYDLDMIIDRNGGQP  
PLTYKHQFQTLVSRMESIDMPVGTMTAETIGKCITPVLDDHDDKYGVPTLEELGFDTEGLPSAVWPGGETEAL  
RLERHLERKAWVANFERPGMNSTSLASPAGLSPYLRFGCLSCRLFYFKLTDLYKKVKKNSSPPLSLYGQLLW  
REFFYVAATNNPRFDKMEGNPICVQVPWDWNPEALAKWAEGMTGFPPWIDAIMTQLRQEGWIHHLARHAVACFL  
TSGDLWISWEEGMKIFEELLLDADWSVNAGSWMWLSCSSFFQQFFHCYCPVGFGRRTDPNGDYIRRYLPVLRD  
FPAKYIYDPWNAPESVQKAAKCIIGVHYPKPMVNHAEASRLNIERMKQIYQQFSRYRGLGLLASVPSNPNASG  
GAMGYFPGESTHGFSSITGRSCLGNSPSSGKQPSAWKEMPGLGPKVQRQSI

>Scyliorhinus\_cani\_\_XP\_038663740.1

MVLNSVHWFRKGLRLHDNPALQSRSLSGADTVRCIYILDPWLVAASNIRINRWRFLQCLEDLDSSLRKLNLSRL  
FVVRGQPADVFPRLFKEWNMTQTLTFEYDSEPFQKARDATVMKLAENAGIEVIVRNSHTLYEVDRIIEANDNKP  
PLTFKRFQTIKQLELPKAPVNPVTLQMEKCTRTIQENHDQMYGIPSLLEELGFDTSLELPAIWQGGETEAL  
RLSKHLEQQTSIANYEKPKLNADFLSSPTGLSPYLRFGCLSCRTFYTYTLRFYRMVKKQGNPPLSLYRKLW  
REFFYTAATNNPNFDKLEGNPICMQIPWDKNQQAATKWAHQGTGFPPWIDAIMQLRQEGWIHQLARRAVACFL  
TRGDLWISWEEGMKVDFEMLLDADFSVNAGSWMWLSCSAFFQKFFQFYCPVDFGRRTDPSGDYVRRYLPVLRG  
YPAKYIYEPWNAPIEVQKAANCIVGIHYPKPMINHREASRLNIERMKQIYPKLSHQERFCSCLPNHVKTAAIM

EKGNKPEDTEIEDGCKPAKIPCLQSPEGDGRNEEEAMAPEYVPEKVKKAEEKKLEENPYDLDAWSILIREAQNQ  
PIDKARKTYERLVTQFPSSGRFWKLFIEAENPYCQLLLGFELSIPEIFMVMYLIDYCFLD  
>Scyliorhinus\_torazame\_GCB62468.1\_hypothetic  
MMLNSVHWFRKGLRLHDNPALQSRSLSGADTVRCIYILDPWLVAASNIRINRWRFLQLCLEDLDSLSRLKLSRL  
FVVRGQPADVFPRLFKAWNMTQLTFEYDSEPFQKARDATVMKLAENAGIEVIVRNSHTLYEVDRIEANDNKP  
PLTFKRQFTIIKQLELPAKPVNPVTLQMEKCTRTIQENHDQMYGIPSLLEELGFDTSSELGPAIWQGGETEALA  
RLSKHLEQQTSIANCEKPKLNADYLLSSPTGLSPYLRFGCLSCRTFYITLLRFYRMVKKQDNPPSLYKLLW  
REFFYTAATNNPNFDKLEGNPICMQIPWDKNQQAALTKWAHQGTGFPWIDAIMKQLRQEGWIHQLARGAVACFL  
TRGDLWISWEEGMKVFDEMLLDADFSVNAGSWMWLSCSAFFQQFFQFYCPVDFGRRTPSGDYVRRYLPVLR  
YPAKYIYEPWNAPIEVQKAANCIVGIHYPKPMINHLEASRLNIERMKQIYPKLSHQERFCSCLQNHEKTAGIM  
EKGKPEDTEIEDGCKPAKIPCLQSPEGDGRNEEEAMFLDLTHNF  
>Scyliorhinus\_tor\_GCB77202.1\_scyTo  
VAVSPRAPQQCVPSPSHMETHSIHWFRKGLRLHDNPALMEALRGASTVRCVYILDPWFAGSSNVGVNRWRFL  
QCLELDLDSALLELNSRLFVIRGQPADVFPRLFKAWNINRLTFEYDSEPFQKERDAAIKKLASEAGVEVIVKIS  
HTLYDLDKIIELNNGQPPLTYKRFQTLISQLDSPEPPVETISEGRLGKCAVLVLDHNEKYRVPSLEELGFDI  
EGLHSAVWPGGETAALTRLERHLERKAWVASFERPRMNAFSLASPTGLSPYLRFGCLSCRLFYFKLTDLYKK  
IKKTNSPPLSLYQGLLWREFFYTAATNNPCFDKMEGNPICVRIPWDKNPVSLAKWAEGKTGYPWIDAIMTQLR  
QEGWIHHLARHAVACFLTRGDLWISWEEGMKFFHCYCPVGFGRRTDLSGDYVRRYLPILKGFPKAYIYDPWNA  
PDSVQVAAKCIIGVHYPKPMVVAEASRLNIERMKQIYQQLSRYRGLGLLASVPSNQNGNRTMYSLRDQLSE  
NSGIARSHTVGAIGKRELEHDTTVGDEVESLAQKIRRHCDDELTRGASSV  
>Selaginella\_moe\_bluelightPa\_XP\_024526689.1  
MANAADGDGLVDLELIMDANLSSSSIAHATLGAAPPEELEVELHSEVVDKPAQRHFIPCGNLASLSLALNTL  
MPLSSKVGVLPRKLLAKPPANLPSQKKANSPIPVVPSSKLKFGLDVEPQQQQQQSSASKICSSATAFPDYQML  
PRSGRRYGNPAAGAGMRRASIVWFRNDRVHDNEALAAANKESLSVIPVYCFDPKDYGKSASGFDKTGPYRAK  
FLVEC VANLRDNLRERGSELVVRIGNPVEVLSTIAKAVGADGLYAHQEVSSSEELGMEDKVTSAKLDQNV DVKF  
FWGSTLFHVDDLFPKVEDMPSNYGGFRDKVKDVQVRAATEAPKQLKGLPSQGDVKAGDIPSLQELGLSPVSAA  
GQOEKHKRNMIGGEVEALKRLKSFSLSVPPPSKGGKENSIIYGANFSSKISPLWAMGCLSPRKMFEDELKKTTS  
RLVPKPTPTSVAPSSAASGDSGMQWLVFELLWRDFFRFVTKKHGAAKKTQTEAVPAMACA  
>Selaginella\_moe\_XP\_002969486.2\_cry-1\_  
MGSSTTIVWFRDLRVEDNPALAAASKAGAVVPLFIWCAEEEGEFRPGRVSRWWLKQSLMHLNSSLTCLGCPL  
LMQKSRGSSSLNALLQIARDTKATQVFYNHLYDPVSLIRDHHVKHGLSQYGITVQTFNADLLYEPWELFDARGN  
PYTHFQLFWQRYLGMDEPDGPLLPPKRLSPPAEPGLGHLGLPAEELGLEDDFEKSSNAMLARTWTPGWSNAN  
KSLDAFLAGPLADYGDNRGKVDGGTTSMLSPHLHYGELSIRKVFHAVRSKQLLWITDGRQPAERSASLFLRAL  
GYREYSRYLCFHFPFTHERSLLGHLRHFPWRVDEGFFKAWRQGRGTGYPLVDAGMRELWATGWLHNRIRVIVSS  
FCVKFLQLPWRWGMKYFWDTLDDADLESIDILGWQYISGSLPDGHEDRMEIPHIEGRRFDPDGNVVRKWLPEL  
SRLPTEWIHEPWNAPPSVLCAAGIELGCNYP RPVEIAAARERLQRLRDMWEHNSNSISNGSGTPEPPEINS  
DNGEQQIRDYGGSNHGQCHESQRRSNDQMVIERNQOQQQQQRDRCSDTSHPDQIVPTLLPDFNTLRSGSSRIHH  
HHHHHHHHLQPQQHNFALAGPGEDFHPANHRQEQHPQQQQFPQLQLQPPQQHQQAVEMMDSVDNSTAESSA  
FRNNDGYATAAAVWFPTHSNRRRVDF SAYL  
>Selaginella\_moe\_XP\_002972041.2\_photolyase  
MSQLSGKKEVAGALDAAAAGAKKQKLDADGGGFLGEGLRSSIGVNPRRVRLVLSQGDESHSGPVVYWM SRDQRS  
RDNWALLYAAEQARKRDTPVAVVFNLVESFLEAKARHFGFLLRGLRVVEKNLEKLGIAFFLLRGRPEDTIPAF  
VEACNASILVLD FSPLRIGRTWRTGVVSR LGADTTTAVHEVDAHNVPVWIASDKLEYAARTIRLKIQRQLPE  
FLVDFPTLEPF SKPWPGVAQEKIDWDSLIDEVLRAGDEVPEVDWCEPGEDIALERLAGFLSSRLQRYSAERN  
PSKLERLSDLSPYFHYGQLSPQRCAFEVRKARKLHMQSVD SFLEELIIRRELSDNFCYYQPNYDNIQGAWEWA  
RNSLLEHANDKREHIYTRQQLLEDGKTKDKLWNASQLEMVHRGKMHGFM RMYWAKKILEWTESPEDALAIAYF  
NDKYQLDGRDPNGYVGC MWSICGIHDQGWKERPIFGKIRYMNIEGCKRKFNV DGYIMYVNKLVAEVKKRRKSQ  
ERTLEC  
>Selaginella\_moe\_XP\_024537592.1\_cry\_DASH,\_  
MADAVESMIQRYSSAGSSRNKGVSIMWFRNDRIVDNEALFKAWASSSVLPVYCVDP RHFGTTHYFKFPKT  
GELRAQFLLLESVLDLKKNLKKRGLDLVIRSGNPEFILPLLVEAVGAHTIYAQEETCSEELQVEKAVKKSIGTK  
AKLELVWGT TMYHLNDLPFTTARLPDVYTQFRKAVESSSRVRPCLKLPQTLGPLPDSLGEKVGDLDPVNLSD  
LGLRPREQSSLAAMQFTGGETAAIQRLCEYFWTKNCLRN YKETRNGLGADYSTKFS PWLASGSI SPRFIYEE  
VKRYEKERTANNSTYVWLFELIWRDYFRFLSMKYGNSIFHLEGPRKVRTKSWSQDKTLFEAWRTGTTGYPLID  
ANMRELYATGFMSNRGRQIVCSFLVRDMGIDWRMGAEWFE SCLLDYDPCSNYGNW TYGAGVGNDPREDRYFSI  
PKQAQTYDPDGSYVSHWIPQLQELPTDARHSPKVGYLKKIVPLRFSNPGRTYKTSANFRK  
>Selaginella\_moe\_XP\_024540344.1\_(6-4)DNA\_p  
MALLWFRKGLRLHDNPSLEAACHGSRNVYPVFVLDPWFLAPDPRASSPGSARVGINRIQFLLLESQDLDRNLS  
SRGSKLLL VHGNPIQVIPELLDKWRIRKLCFEFDTEPYALDRDAKIKEHAKDKGIELHCPVSHTIFNPDLLIA  
KNGGKAPLTFQSFCKNLVPATKPIGNGPSAIPPTGDLHGKIVVPVPTLEELGYADFHEDFSPFRGGETVALTR

LEDLANEKWVCEFEKPKGDPTAFIKPATTVLSPYLKFGCLSSRLVYSRVKEVYSRAKSFTSPPVSLEAQLLW  
REFFYTAAYATANFDMVGNPICKQIPWKDDDELLSAWRDGRGTGYPWIDAAMTQLRKWGMHHLARHAVACFL  
TRGDMFVYWEKGRDVFDRLLIDADWSINNGNWLWLSASAFFNQYHRIYSPITFAKKYDRQGNYIKHFLPVLKD  
MPQEFIYEPWKAPAEIQRKAKCIIGKDYPTPVLDAHAAASKICRERMGAAYALSKSSHGNVSREQVDELQDTLT  
DVPTSSTSKNKRQKQSRITDYSA

>Sepia\_off\_QHA94772.1\_cry\_6\_vari

MNSCSNKDMDLEIKKKISVHWFRHGQRIHDNPALVDAVNDSDIFYPIFIFDQKVGAGTELCGYNRWRFLLENLK  
DLDESFSKFGGKLYCFHGQPVDFQKLFKEWNVNYITAEEDPEPIWQERDESVKKLCEKSGVTCKFFTSHTLY  
SPQEIIDKNGSTPPLTLELFLQLVITSLGPPLRPLPQPNLQDINMPVPKDLKKFALPTLDDFFGIEPEFEEQKNP  
LNVFVGGETRALNLLKARLEKEKSSFEQDSCQPNHQEQPQLLAKAVSLSPYLRFGCVSIRRTYWGICDMYREV  
HNKEPPSEVVCQLYWREYFYVMSVGNLNYDKMEGNPICLQINWQKNDEHLKKWELGQTGF PWIDAIMNQLRFE  
GWNHHVGRHSVSCFLTRGDLWISWEDGLKVFLKYQLDADWSVCAGNMMWVSSSAFEKALQCPTCYSPVMYGM  
MDRNGEFVRMYVPVLKDMPLKYLFCPWKAPLEIQKNANCIIGKDYPEPICSHRDMRSRVNMSKMYRVKEKLLKA  
GIPHCAPTGEME VVKFAWLPPIEHHDLAHNL

>Sepia\_off\_QHA94774.1\_cry\_123

MSGEREKNVIHWFRKGLRLHDNPALKEALKGANTIRCIYTLDPWFAAGSSQVGINKWRFLNLCLEDLDASLRKL  
NSRLFVVRGQPADVFPQLFKENITTLSEEDPEPFGKDRDAAICTLVRDAGIEVIKTCHTLYDSKAILKEN  
GGRPPLTYNKFQKILAEMDLPPRPLETVTASDFGNCRTPLSVDHDEKYGVPTLEELGFDTEGLGQTNFHGGET  
EALARLDRHLERKAWVASFEKPKMTPQSLFPSHTALSPYLRFSCLSRPLFYWKLTLEYTKIKKKSNNPPLSLHG  
QLLWREFFYTAASNNPRFDQMVGNPVCVQIPWDINQEALAKWAEGMTGF PWIDAIMKQLRKEGWIHHLARHSV  
ACFLTRGDLWISWEDGMKVFEELLLDADWSVNAGMWWLSCSSFFQQFFHCYCPVGFGRKIDPNGDFIRHYLP  
ILKRFPKYYIYEPWNAPEVQKTAKCIIGKDYPPVPMVNHSEVSRINMERMRQVYHRLTMRSSATIPKQIHSRE  
GLQYSKHSKPMDICFHGTSKHKRYDQHFMLKSY

>Sepia\_phar\_\_CAE1232360.1

MSGEREKNVIHWFRKGLRLHDNPALKEALKGANTIRCVYTLDPWFAAGSSQVGINKWRFLNLCLEDLDASLRKL  
NSRLFVVRGQPADVFPQLFKENITTLSEEDPEPFGKDRDAAICTLVRDAGIEVIKTCHTLYDSKAILDKN  
GGRPPLTYNKFQKILAEMDLPPRPLETVTASDFGNCRTPLSVDHDEKYGVPTLEELGFDTEGLGQTNFHGGET  
EALARLDRHLERKAWVASFEKPKMTPQSLFPSHTALSPYLRFSCLSRPLFYWKLTLEYTKIKKKSNNPPLSLHG  
QLLWREFFYTAASNNPRFDQMVGNPVCVQIPWDINQEALAKWAEGMTGF PWIDAIMKQLRKEGWIHHLARHSV  
ACFLTRGDLWISWEDGMKVFEELLLDADWSVNAGMWWLSCSSFFQQFFHCYCPVGFGRKIDPNGDFIRHYLP  
ILKRFPKYYIYEPWNAPEVQKTAKCIIGKDYPPVPMVNHSEVSRINMERMRQVYHRLTMRSSATIPKQIHSRE  
GLQYSKHSKPMDICFHGTSKHKRYDQHFMLKSY

>Sepia\_phar\_\_CAE1267008.1

MQARIICFFLETGLLILFFWCF SARKMDSSFNKMDIEIKKKISVHWFRHGQRIHDNPALVDAVKDCDEFYPI  
FIFDQKVGAGTELCGYNRWRFLLENLKDLDDESFSKFGGRLYCFHGQPMDFQKLFKEWNVNYITAEEDPEPIWQ  
DRDNSIKKLCEKSGVTCKFFTSHTLYSPQDIIAKNGGTPPLTLELFLQLVITSLGPPLRPLPQPDLDVNMPVP  
KNFKKFALPTLEFFGIEPEFEEQKKPLNVFVGGETRALNLLKARLEKEKASFEQDSCQPNHQEQPELMAKAVS  
LSPYLRFGCVSIRRTYWGICDMYTKVHNKEPPSEVVCQLYWREYFYIMSVGNLNYDKIENNPICLKINWQKN  
EHLRKWELGQTGYPWIDAIMNQLRFE GWNHHVGRHAVSCFLTRGDLWISWEDGLKVFLKYQLDADWSVCAGNW  
MWVSSSAFEKALQCPTCYSPVMYGM RMDRNGEFVRTYVPVLKDMPLKYLFCPWKAPLEVQKAANCIIGKDYPE  
PICSHRDMRSRVNMSKMYRVKEKLLKADIPHCAPTGEME VVKFAWLPPIEHHDLAHNL

>Sepia\_phar\_\_CAE1268455.1

MLTDVDAFPQDANGGVLYWMVRDQRLQDNWAMLFAQRLALKEKTSLHVCFCCLVSPFMEATERHYDFVIRGLQE  
VEKPDVDMVAKKKLKMDTSVKPVDWAI PGERAGLKLTLESFCNERLKYFATERNDPTKSSLSNLSPWLHFGAYD  
WAKKSLKEHEKDKREYIYTQEQL ENANTHDQLWNAAQIQLLTEGKMHGFLRMYWAKKILEWTANPAEALCVAI  
YLNDRYSLDGMDSNGYVVLGHKWQGNMPGAEFADDAGVTFTRALLLGVCHSGDAERLPANPIPCVVLQNDRE  
KINSSFPLSIVLSSPLSFTR

>Seriola\_lala\_dorsalis\_XP\_023253166.1

MVVNSVHWFRKCLRLHDNPALQEALNGADTVRCVYILDPWFAAGANVGINRWRFLLEAELEDLSSSLKKLNSRL  
FVIRGQPTDVFPRFLFKWKVTRLTFEYDPEPYGKERDGAIIKMAQEFGVETIVRNSHTLYNLDRIIEMNNNSP  
PLTFKRQFTIVSRLELPRRPLLPITQQQMEKCHTKIADNHDQLYSIPSLEELGFRTEGLPQAVWRGGESEALD  
RLNKHLDKKVWVANLEHPRVNTCSLYASPTGLSPYLRFGCLSCRVLYYNLRELYMKLRKRCSPPLSLFGQLLW  
REFFYTAATNNPNFDRMEGNPICVQIPWDQNEALAKWAEGRTGF PWIDAIMTQLRQEGWIHHLARHAVACFL  
TRGDLWISWESGMVFEELLLDADWSVNAGSWMWLSCSAFFQQFFHCYCPVGFGRRTDPSGDYIRRYIPILKD  
YPNRYIYEPWNAPEPVQKAANCVVGVDPKPMINHAEGSRLNIERMKQVYQQLSHYRGLSLLASVPTIQEEAE  
PPMTDESQTSSGPDSPRDVDNEAAGCSTAPDSSTVCASSTFALHPDLEDTLNCRPFQTPCTFSHTQASAAV  
TSTSANHPLSLAASPSLASTPIQGSLSRSKPSSPSSSCPTLSSSSSPVLTLAQTFFPKRKS LARKVRRSQRQRG  
RQICTPSGREGERRAEERDDTGGDKRMEEDVEPDEERMEETSEKLAGLQQ

>Seriola\_lala\_dorsalis\_XP\_023259636.1

MPPSAGGAEDSKTLVRKLLREVLVGREDPEGFFAMCLSVLGHQETRSQFP SLIRPLSTANCSMYSTLTGIYQE  
YFSVVSECLLNTEDDELEVALALSVLEMKDHQMSAPSQESRLQQPKDRPNQSSSVQLTSVSQPQGSSTQLAD  
VAGRKKNSHSAQSGPWGMVCPPQTTRETEPQKSTHVDKYNKWTPGTSQTESVSKPSASFQKQELVIEGGQMTK  
EGDLNQSGKPKRSKNRRQRRKAGGQQVVLGPCSPSAPQPVLLWFRDLRLCDNPALIGSLEVGA PVI PVFIWS  
PEEEEGPGITVAVGGACKYWLHQALSHFCSSLESIGSHLIFLKADGGGDGVGSSSLCTLKELIKKTGARTVLAN  
ALCEPWLKERDDVVVSDLQKDGVECRMFSYCLRDPYSVSTEGVGLRGIGSVSHFMSCCRQNP GSALGVPLDS  
PASLPTPAHWPQGVSLDTLGLARMPRRKDGTIDWAANIRKSWDFSEEGAQAQLEAFLHDGVYRYEKESGRAD  
APNTSCLSPYLHFGQLSPRWLLWDAKGARCRPPKFQKRLAWRDLAYWQLTLFPDLPWESLRPPYKALRWSSDR  
GHLKAWQRGQTGYPLVDAAMRQLWLTGWMNNYMRHVVASFLIAYLHLPWQEGYRWFQDTLVDADVAIDAMMWQ  
NGGMCGLDHNFMHPVDAAMTCDPYGSYVRKWCPELADLPDELIHKPWKCPASMLRRAGVVFQGTYPDRIIT  
DLEERRSQSLQDVA VVRKEFGHYVDKRTGCDLVPLPPRLVSEALGLSHSNGGVVAEGKQFLLPVITRMEFKHQ  
LEDPDADAASNPNYNAVLKGYVSRKRDETI AFLNERDFTASVMYEGAQRKERLEKDYRRMEGLPQPAAPRGRAR  
RTPTAKDRFSIVPGGAVTSLR

>Seriola\_lala\_dorsalis\_XP\_023263640.1

MSTSRTIICLLRNDLRLHDNLFHWAQRNAEYIVPLYCFDPRHYAGTYNYNLPKTGPFRLRFLLESIRDLRNT  
LLNKSSNLVVRGKPEDVVAELIKQLGSVSTVAFHEEVTSEELNVEKKVKDVC AQMKVKVHTCWGSTLYHRDD  
LPFHHSIRLPDVYTQFRKAVETQSMVRPAFPTLEQLKPLPSGLEEGAVPTAQELQQTEPLTDPRSAPFPCSGGE  
SQALARLKHYFWD TDAVATYKETRNGLIGVNYSTKFAPW LAMGCISPRYIYHQIKQYERERTANQSTYWVIFE  
LLWRDYFKFVAVKYGNRLFQ LKGLQDKSVPWKKDMKLFNAWKDGRTGVPFVDANMRELAMTGFMSNRGRQNV A  
SFLTKDLGLDWRMGAELEFYLLIDHDVCSNYGNWLYSAGIGNDPRENKFNMIKQGLDYDNNGDYVRQWVPEL  
QGIRGADVHTPWT LSTAALSHAHVSLDETYPTPIVMAPEWSRHVNKKSSGTGPSRGRKGPSHTPKQHRDRGI  
DFYFSRSKNL

>Seriola\_lala\_dorsalis\_XP\_023267685.1

MAHTCIHWFRKGLRLHDNPALMAALRDCKELYPVFI LDPYLHTNTHVGINRWRFLIGALKDLDCSLRKLNSRL  
FVVRGKPEDVFPKLFNKWKVTKLTYEYDTEPYSLSRDKKVMELAKEHEVEVIYKISHTLYNIDRIIEENNGKA  
PLTYNRMQAIVKTLGRPKKPIPAPTMEDIKDVKTPCSENHEKKYGIPALEELSQDTADLAEELFP GGQEALR  
RLDEHMKRTGWVCNFEKPKTSPNSLSPSTTVLSPYVTFGCL SARTFWWKLTEVYQGGKHS DPPPVLHGQLLWR  
EFFYMASVGIPNFNKMEGNPVCTQVDWDANTEYLA AWREARTGFPFIDAIMTQLRQEGWIHHLARHAVACFLT  
RGDLWVNWEEGQKVFEELLLDGDWALNAGNWQWLSASAFFHQFFRVYSPVAFGKKTDKNGDYIKKYLPL LKKF  
PVEYIYEPWKAPRNIQQAAGCIVGKDYPHPIVQHEVISKKNIQRMKLAYAKRSSDHTE SPSKKQGA KRKAPSV  
VDMLTKKERRK

>Seriola\_lala\_dorsalis\_XP\_023270531.1

MLLCIWRSSSFSSAPRRLRLVHNSNLRPCLINSLFTKSFTSETIMSDRKRKATSAPAGKKPTAKQQKL VPLK  
EEKKERAGGWLQEK LKQRRETEKKEMKFNKKRLRFVSDTEKIKQGSEGVLYWMSRDHRVQGEHTPSSKTIRHLV  
WLHLQDVIDM PISVFLSSPFFTSQPVDWDKTLVSLQVDRTVGEPEWATPGTKGGIAMLESFIDVRLKLFDTKR  
NDPNADALSHLSPWIRFGHLSAQ RVALQVQHSGKKAGQSVSSFIEELVVRRELTDNFCFYNNKYDSVEGASEW  
AQKTLEVHAEDNRPYLYTRQQLEEAKTHDKLWNAAQYQMVSEGMHGF LRMYWAKKILEWTSSPKEALSIALY  
LNDRYELDGQDPNGFVGCMWSICGIHDQGWREAVFGKIRYMNKYGCTRKFDVAQFERKYCPKKL

>Seriola\_lala\_dorsalis\_XP\_023271280.1

MVVNTIHWFRKGLRLHDNP SLRDSIRGADTLRCIYILDPWFAGSSNVGINRWRFLNLCLEDLDASLRKLNSRL  
FVIRGQPTDVFPRLFKEWQIT HLSYEYDSEFPFGKERDTAIQKLANEAAVEVIVRISHTLYDLEKIMELNGGQP  
PLTYKRFQALINHMDAVELPAGTITSEVIKKCATPIGDDHDDKFGVPSLEELGFETEGLT TAVWPGGETEALM  
RLERHLERKAWVANFERPRMNANSLASPTGLGPYLRFGCLSCRLFYFKLTDLYRKVKKNSTPPLSLY GQLLW  
REFFYTATNNPCFDKMEGNTVCVQIPWDRNPEALAKWAEGR TGFPWIDAIMTQLRQEGWIHHLARHAVACFL  
TRGDLWVSWEEGMKVFEELLLDADWSVNAGSWMWLS CSSSFFQQFFHCYCPVGFGRRTPSGDYIRRYLPILRG  
FPARYIYDPWNAPEEVQKAAKCIIGVHYPKPMVNHA EASRINIERMKQIYQQLSCYKGLGLLATVPDNP SNGP  
RGSNAAGVNRGTSHGPGGPSEALS IQEGTSRTERGPSTQKRRYEEAPSKSSSKSWRQSK

>Siganus\_gutt\_\_BAL72538.1

MVVNTIHWFRKGLRLHDNPALRDSIRGADTLRCIYILDPWFAGSSSVGINRWRFLNLCLEDLDASLRKLNSRL  
FVIRGQPTDVFPRLFKEWQIT RLSYEYDSEFPFGKERDAAVHKLASEAGVEVIVRISHTLYSLAKI IELNDGHP  
PLTYKRFQDIISQMDAVEHPAETVTQRDLDKCTTPI SKNHSKDFGVPSLEELGFETEGLSAAVWPGGETEALM  
RLEQHLEWRESVLNHGCSHIDARSLLANPTVLCPYLRFGCLSCRLFYFRLTELHKKIKQNNIPPPYFYDQLLW  
SEFLYTVSTNNPCFDKMEGNPVCIQIPWDRNPEALAKWAEGR TGFPWIDAIMTQLKQEGWIHSLAKYSVACFL  
TRGDLWISWEEGMKA FEELLLIDADWSMNAGSWMWFSCSSFFRQFFHCRCPVESGRKDPQGDYIRRYLPVLRG  
FPAKYIYDPWNAPEEVQKEANCIIGVHYPKPMVNHA EASINIERMKQIYQQLSGYRGLALLATVPVHPNRGT  
SGSSVARFNPGTGQVAEGSSENLS TQEGTSGTGRVQS AKKRRREEDSLESSSKKNPEAPVYERPKLSAKS

>Siganus\_gutt\_\_BAL72539.1

MVVNSVHWFRKGLRLHDNPALQEALNGADTVRCVYILDPWFAGSANVGINRWRFLLEAELEDL DNSLKKLNSRL  
FVVKGQPTDVFPRLKKEWKVTRLT FEYDPEPYGKERDGAIIKMAQEFGVETIVRNSHTLYNLDRIIEMNSNNP  
PLTFKRFQTI VRRLELPRRPLAPITQQQMDKCRTKIADNHDQLYSIPSLEELGFRT EGLPAAVWRGGESEALD

RLNKHLDKKVWVANLEHPRVNTCSLYASPTGLSPYLRFGCLSCRVLYYNLRELYMKLCKHSSPPLSLFGQLLW  
REFFFYTAATNNPNFDRMEGNPICVQIPWDQNPEALAKWAEGRGTFPWIDAIMTQLRQEGWIHHVARHAVACFL  
TRGDLWISWESGMKVFEELLLDADWSVNAGSWMWLSCSAFFQQFFHCYCPVGFGRRTDPSGDYIRRYIPILKD  
YPNRYIYEPWNAPEVQKAANCVVGVDPKPKMINHAEGSRLNIERMKQVYQQLSHYRGLSKSTHQFLPV

>Silurus\_meri\_\_KAF7698971.1

MGVNAVHWFRKGLRLHDNPSLRECIVGADTLRCVYILDWPWFAGSSNVGINRWRFLQLCIVDLASLRKLNSRL  
YVIRGQPTDVFPRLFKEWKITHLSYEYDSEPFQKERDAAIKKLASKAGVMVNVRIHTLYDLEKIIELNGGQS  
PLTYKRFQALISRMDGVEMPTETITAEITLTKCIMPDIADHDEKFGVPSLEELGFETDSLPTAVWPGGETEALT  
RLERHLERKAWVANFERPRMNANSLASPTGLSPYLRFGCLSCRFLFYKLTDLRYKVKKNSVPPLSLYGQLLW  
REFFFYTAATNSPCFDMEGNSICVQIPWDRNPEALAKWAEGRGTFPWIDAIMAQLRQEGWIHHLARHAVACFL  
TRGDLWISWEEGVKVFEELLLDADWSVNAGSWMWLSCSSFFQQFFHCYCPVGFGRRTDPNGDYIRQYLPVLKG  
FPAKYIYDPWNAPEVQKLAKCIIIGTHYKPMVNHAEASRNIERMKQIYQQLSCYRGLGLLASVPSNASGNC  
DGAGACLNSADSTQDSNAAGPDGLKSWRQDIKQQRQSDRGAATLKRHGEDTGSSTGCKIQKL

>Silurus\_meri\_\_KAF7705967.1

MYAGFSVFFRLRRVLEVRRAVIMSEKKQKNLKRKAPEMKGPEKLSAPRGAEREAGWLQDTVAEIRNSFECKF  
NTKRLRFLSEAQKVRQGCAGVLYWMARDQVRQDNWALVYAQELALEEKLPLHVCFCIVPRYLESTYRQYAFML  
RGLQEVAKECTSLNVQFHLLRGEPELTLPFVVKHWDVGAVVTDNFNPLRLPLQWTERVKKQLPSDVPFIQVDAH  
NVVPCWEASSKLEYAARTIRGKITKLLPEFLTEFPLVDAHYPYTSTKTPKKVDWEEVMSSLVVDRSVGEVQWAE  
PGTAGGVAMLESFIEQRLRIFATERNPNANALSQLSPIHSGQISAQRALLEVRRWGKRSPESVSSFTEELL  
VRRELCNFCFYNNENYDNFSGAYDWAKKTLQDHTKDRRSYVYSQEQLENAETHDPLWNAQRQLLLEGKIHGF  
MRMYWAKKILEWTSSPEEAVNISIIYLNDRYSMDGCDPNGYVGCMMWSVCGIHDQGWAEPRVFGKVRMYNAGCK  
RKFDVAQFEKRYAVKKA

>Silurus\_meri\_\_KAF7707629.1

MVVNSVHWFRKGLRLHDNPALQEALNGADTARCVYVLDWPWFAGAANVGVNWRFLLESLEDLDTSLRKLNSRL  
FVVRGQPADVFPRLFKWNVTRLTFEYDSEPYGKERDGAIIKMAQEFQVETIVRHSHTLYNPDRIIEMNNNHP  
PLTFKRFQAIVSRLPLPKPLPTITPGQAMGRSSQSENHNKRYGVPSLQELGFKPQGEAVPVWRGGETEAL  
RLNKHLDKAWAASFERPRIKAHSLFASPTGLSPYLCFGCLSSRVLYYHLRELYMKLRRRSSPPLSLFRQLLW  
REFFFYTAATNNPSFDRMEGNPICVQIPWDQNPEALAKWAEGRGTFPWIDAIMCQLRQEGWIHHLARHAVACFL  
TRGDLWISWENGKMKVFEELLLDSDWSVNAGSWMWLSCSAFFQQFFHCYCPVGFGRRTDPSGDYIRRYIPILKD  
YPSRYIYEPWNTPEIQKAANCIVGVHYKPMNLNHAESSRLNIERMKQVYQQLSHYRGLSLLASVPTIQEEAE  
PSMSDDSQASSSGSISMSHQPPQPEFEPQPPQTDPDPDQDPDPEPSSAPAAVRKRGRSSEPQNSQNPVKVQHT  
SQTIAEQLRTNSKE

>Siniperca\_chua\_\_XP\_044032540.1

MSTSRTIICLLRNDLRLHDNELFHWAQRNAEYIVPLYCFDPRHYAGTYNNYLPKTGPFRLRFLLESIRDLRNT  
LLNKGSNLVVRRGKPEEVVADLIKQLGSVSTVAFHEEVTSEELNVEKRVKDVCAKMKVKVHTCWGATLYHRDD  
LPFHHISRLPDVYTQFRKAAETQSRVRPVFPTPEQLKPLPQGLEEGAVPTVEDLQQTQPVTDPRSAPFCSSGE  
SQALARLKHYFWDTDVATYKETRNGLIGVDYSTKFAPWLMGCISPRYIYHQIKQYERERTANQSTYWVIFE  
LLWRDYFKFVGKYGKGNRLFQVEARGNFLSLGLQDKSVPWKKDMKLFNAWKEGQTGVFPVDANMRELAMTGFSN  
RGRQNVASFLTDLGLDWRMGAEWFEYLLIDHDVCSNYGNWLYSAGIGNDPRENKRKFNMIKQGLDYDNNGDYV  
RQWVPELQGIRGADVHTPWTLSAALSHAQVSLGETYPTPIVIAPEWSRHTNKKLNGTGSPRGGKGPSHTPK  
QHRDRGIDFYFSKSKNL

>Siniperca\_chua\_\_XP\_044047054.1

MLCFCNCHLVGLRNRDMNLSRCPELPNISPKSSMAHTCIHWFRKGLRLHDNPALMAALRDCKELYPVFILDY  
LHNNTCVGINRWRFLIGALKDLDCSLRKLNSRLFVVRGKPEDVFPKLFSQWKVTKLTYEYDTEPYSLSRDKTV  
TALSKEHGVKVIYKISHTLYDIDRIIEENNGKAPLTYNRMQAIVKTLGPPKRPPIHAPSMEDEMDVETPCSENH  
EKEYGIPTLEELCQDTAALREEQFPGGEGEALRRLDEHMKRTGWVCSFEKPQTSFNSLSPSTTVLSPYVTFGC  
LSARTFWWRRLTDVYQGGKHSPPVSLHGLLWREFFFYTASVGIPNFKMEGNPVCTQVDWDTNPEYLAAWREA  
RTGFPPFIDAIMTQLRQEGWIHHLARHAVACFLTRGDLWISWEEGQKVFEELLLDGDWALNAGNWQWLSASAFF  
HQFFRVYSPVAFGKKTDKNGDYIKKYLPLLRKFPATYIYEPWKAPLRIQQAAGCIVGKDYPHPIAQHEVISKK  
NIQRMKLAYAKRSTDSADTPSKKQGVKRRAPSADMLKKKREKVS LHK

>Siniperca\_chua\_\_XP\_044047888.1

MVVNTIHWFRKGLRLHDNPSLRDSIEGSDTLRCIYILDWPWFAGSSNVGINRWRFLHLCLLEDLDAASLRKLNSRL  
FVIRGQPTNVFPRLFKWQITRLSYEYDSEPFQKERDAAIQKLASEAGVEVMVRIHTLYNLDKIIELNDGQP  
PLTYKRFQALLNRMDAVELPAETIMSKVIKKCATPISDDHDDKFGVPSLEELGFETEGLTAVWPGGETEALM  
RLERHLERKAWVANFERPRMNANSLASPTGLSPYLRFGCLSCRFLFYKLTDLRYKVKKNNTPLSLYGQLLW  
REFFFYATASNNPCFDMEGNPVCVQIPWDRNPEALAKWAEGRGTFPWIDAIMTQLRQEGWIHHLARHAVACFL  
TRGDLWISWEEGMKAFFELLLIDVDWSVNAGSWIWLSCSSFFQQFFHCYCPVGFGRRTDPNGDYIRRYLPILRG  
FPAKYIYDPWNAPEEVQKTAKCIIIGVHYPNPMVNHAEASRFNIERMKQIYQQLSCYRGLGLLATVPANPSNGG  
NGSNVGGVNTGTSQGPSSSENRSIHEGMPQTERGQSTQKRRCEEAPLECSSKAWRKNK

>Siniperca\_chua\_\_XP\_044048297.1

MVVNSVHWFRKGLRLHDNPALQEALNGADTVRCVYILDPWFAGAANVGINRWRFLLEALEDLDSSSLKKLNSRL  
FVVRGQPTDVFPRLLKEWKVTRLTFEYDPEPYGKERDGAIIKMAQEFQVETIIRNSHTLYNLDRIIEMNNNSP  
PLTFKRFQTIIVSRLELPRRPLPITQQQMDNCHTKIADNHDQLYSIPSLEELGFRTEGLPPAVWRGGESEASD  
RLNKHLDKKVWVANFEHPRVNTCSLYASPTGLSPYLRFGCLSCRVLYYNLRELYMKLRKRCSPPLSLFGQLLW  
REFFYTAATNNPNFDRMEGNPICVQIPWDQNPEALAKWAEGRTGFPWIDAIMTQLRQEGWIHHLARHAVACFL  
TRGDLWISWESGMKVFEELLLDADWSVNAGSWMWLSCSAFFQQFFHCYCPVGFGRRTDPSGDYIRRYIPIPKD  
YPNRYIYEPWNAPESVQKAANCVVGVDYPKPMINHAEGSRLNIERMKQVYQQLSHYRGLSLLASVPTIQEEAE  
EPMTDESQTSSGPVFLDSPSRGPADTEAAGCSTAPDSSTVCASSTYAPHPHLEDTANSHPSQTTCTSSGSHAQ  
PSAAITSTSVSHPLSTAIPASLAQSLSSSKPSSSCSTLSPSPNPATTTTQTSSSLGPRRKGLAGNVRRSQQRQ  
GRQSCTPAAREGERRSEDEEGEEAEGERMEEDIEQNVERMEEETSGETAGHQQ

>Siniperca\_chua\_\_XP\_044050679.1

MRPSAASGAESHKALLRKMLRDVLVGREDPEGFFATCVSALGHQETRSQFLSLIQPLFTANSSLSILISIIYK  
EYFSETEDDELKLALALSLEMKDHQLSTPSQESRLQQPGDRPNQRSSVQLPAISQPOGSSHTQLAVGGRKEN  
TNSPQTEPWNHNPQHHTTRETEHQKSTHVDKYNKETPGTSQIVCVSRLSGLFSKQDVEEGDQMMDEGDLNQS  
EKPKRSKNRRQRRKGVRQVVGGLPCSPSAPPPVLLWFRRDLRLCDNPALIGSLEVGAAPVPIPVFIWSPEEEEGT  
GTTVAMGGACKYWLHQALSCFCSSLERIGSRLVFLKANGEGNEVGSSSLRTLKELVKETGARTVLNAVYEPWL  
KERDDVVGSAQKDGVECKMFHSYCLRDPYSVSTEGVGLRGIGSVSHFMSCCRQNPGYALGVPLDPPVSLPTP  
AHWPQGVSLDTLGLARMPRRKDGTIDWAANIRKSWDFSEGAHARLEAFLHDGVYRYKKESGRADAPNTSCL  
SPYLHFGQLSPRWLLWDAKGVRCPKPKFQRKLAWRDLAYWQLTLFPDLPWESLRPPYKALWWSSDRGHLKAWQ  
RGRTGYPLVDAAMRQLWLGTWMNNYMRHVVASFLIAYLHLPWQEGYCWQNTLVDADVAIDAMMWQNGGMCGL  
DHWNFVMHPVDASMTCDPYGSYVRKWCPELADLPDELIHKPWKCPASMLRRAGVVFQGYTYPERIVTDLEERRG  
QSLQDVALVRKEFGQYVDKRSGLDLVPLPRLVSEALGLSHRDGGAVTKGKQFLLPVITRMEFKHQLEDPDAD  
AFSNPYNALVKGYVSRRRDETIAFLNERDFTASVIYEGTQSKERLESVYRMEGLPRPPAPRGRARRTPSAKD  
RFSIVPGGAVTSLM

>Siniperca\_chua\_\_XP\_044074458.1

MLHCIWRSSSFSSKPRQLRLAAHSNQRPSVVFSCLTKSFTSQTIMSGKKRKATSAAAAKDPSAKQOKLAPME  
EEKEERAGGWLQDLVKQORTKNKEMKFNKKRLRFISDTEKIKQGSEGVLYWMSRDHRVQDNWALVHAQQLALK  
ENLPMHVCVCLDVPKSELSTLRHYSFMLKGLEEVAKECKTLDIQFHLLHGSAGEVLPGFVSDRCLGAVVTFDS  
PLREPLKWLEDVKKRLPKDIPLIQVDAHNIVTCWEASPKLEYAARTIRGKINKLLPEFLTDFPLVEKHPFTAT  
RTAKPVDWDKTLASLQVDRAVGMPPEWAKPGTKAGIAMLESFIDVRLKQFDTQRNDPNAALSQLSPWIRFGHL  
SAQRVALQVQSRGKNAGQSVSSFIEELVVRRELTDNFCFYNNKYDSVEGAYEWAQKTLKDHAIDERPYLYTRE  
QLEKAKTHDKLWNAQLQMVTEGKMHGFLRMYWAKKILEWTSSPEEALSIALYLNDRYELDGDQDPNGFVGCW  
SICGIHDQGWAERPVGKIRYMNYKGCLRKFDFVARFERKYCPKNL

>Soboliphyme\_bat\_VDP02910.1\_unnamed\_pr

MVDGRFAVDLSLVNVLNSQPVNSTGKFVLYWVQAAPRVAYNAALEMACSLANVHKVPLFAVFLVLSAGYPSANA  
RHYTFLEGLRQFQOKLKEERRLRDLVLQGVASEVPELAKNCCEMVMDMGYTRIQREWYTKVAAKISCRLTQ  
VETNVVVPKVASDKEEFAARTIRPKLWNVAKKYLIEFPTIMPNIISLDEQIWAATSSVVDLSQELTNIIDHM  
KVSFEVAPVINIHGGHIAAVEMLEKFVDSRLKNYEKDRNIPGTAAQSFLSPYLHFGHLSPEAILRVKRSQAP  
AAPKNAFIEELFVRRELAVNFVYNDSDYSIKCLPAWATETLKIHEKDKRPYVYSSEQLENAQTHDIYWNACQ  
LEMVHTGKMHGYMRMYWGKKVLEWSSTVDAAYNWILNMNDKYELDGRDPNGFAGVAWIFGKHDRPHGERAIFG  
KVRYMNEEGLRRKFRGSLEKYVSTCYALAGKATGIKQYMR

>Solanum\_lyc\_cryptochrome\_DASH\_NP\_001318103.1

MDPKNQFSDNSEAQTPQEEQQQTPILPIASISLALSTILPHTFLNPPKISTLFNKNPKVKIPTQVSSLTNLSL  
SASSLPPTNSKFKSTISANPLQNTLTNLPLRPSEPSNAAGLRRASIVWFRNDRVHDNECLNAAHNESMSVLA  
VYCFDPRDYGKSSSGFDKTGPYRASFLIDSVADLRKNLQARGSDLVVRIGKPETVLVELAKAVGAEEAVYAHRE  
VSHDEVKGEDKIDAVMKDEGLEVKYFWGSTLYHVDDLFPKLEQMPTNYGGFREKVQGLEVRKTI EALDQLRGL  
PARGDVEPGEIPLSLVDLGLNPSATMGQNGKSAANASLVGGENEALQRLRKFAAECQAQPSKENKDGNTDSIYG  
ANFSCKISPWLAMGCLSPRSMFDELKKSTRTISAASAKDGGSGTGLNWLMYELLWRDFFRFTITKKYSAAKQ  
NSAAPVTTCVGAAA

>Solanum\_lyc\_NP\_001234245.1\_cry\_2\_

MESNYKTIVWFRDLRIEDNPALAAAARNGSVLPVFIWCPKEEGQFYPRVSRWWLKQSLIHLKQSLKSLGAE  
LVLKMAQSTLSALTECVDAVGATKVYVNHLYDPVSLVRDHNIKQKGLDLGISVQSYNGDLLNEPWEVYDDDGGK  
VFTTFDAYWEKSLSIQNEPVSQLPPWRLTQAAGSVKMCSVEELGLENESKSSNALLGKGWAPGWSNADKALT  
EFVESNLLAYSKDRLRVGGNSTSLLSPYLHFGEVSVRKVFNSVRLKQILWTKEGNSVGKDSATIIYLRAIGLRE  
YSRYICFNFPFTHERSLLNNLRFFPWNADQAHFKAWRQGRGTGYPLVDAGMRELWATGWVHNKIRVIVSSFFVK  
FLLLPLWQWGMKYFWDTLDDADLESIIIGWQYISGSLPDGHELERLDNPEVQGFNYDPEGEYVRHWLPELARM  
AEWIIHHPWDAPLNLVKAAGVELGMNYPNPIIDVDVARDRLMQAIIIMREKEAAVNTSHANGTVEVVFNDSENV  
GDSASIPKDDVVKGEPCPSSSSSYDQVRPSMQNVGTYRKRPKPEEETKKLNDNKLSYKNERIKMSNVGDGLCS  
TAESSMKKQMTVSRNSFSVPRITITMSHDRKSFDDEASSHVKLQKEEEIDT

>Solanum\_lyc\_NP\_001234577.1\_cry\_1b\_

MSSGGCSIVWFRRDLRLEDNPALAAAVRAGSVIAVFIWAPEEEGYCPRVSRWWIKKSLAHLDSLKKLGTSLITKRSNDSVSSLLQVVKSTGATRVFFNHLYDPISLVRDNCAKETLSAEGVSVC SFNADLLYEPWEVVDDDES RPFSTFSDFEWKCLTMPYDPEAPLLPPKRIISGDASRCPSDNLVFESELEKGSNALLARAWSPGWSNADKALTT FINGPLIEYSKNRSKADSATTSFLSPCLHFGESVSRKV FHRIRTKQTLWANEGNKAGEESVNLFLKSIGLREF SRYMSFYHPYSHERPLLGLQKYFPWLVDDEGYFKAWRQGRGTGYPLVDAGMRELWATGWLHDIRV VVSSFSVKV LQLPWTWGMKYFWDTLDDADLES DALGWQFITGTLPDGC EFLGIDNPQFEGYKFDPNGEYVRRWLP ELARLPT EWIHHPWDAPESVLQAAGIELGSNYPFPIVEIVAAKERLEEALSQMWQLEAAARS AIENGMEEGHGDSTDEFV PIAFPQAMQIEMEANNVPVRNNPTITALRRYGDQIVPSMSSSFFRNEDEETSVDIRNSV VDSRAEVPIISM

>Solanum\_lycoper\_NP\_001296304.1

MIKQPFLLTKFTPFSSKSKHTLFTFHCNFSIKMASLTARTTPTVQNV PGLTPEEMERVCEQTFQRYESGGLGK RKKGVAIVWFRNDRVL DNEALLRAWVSSEAILPVYCVDPRLFGTTHYFGMPKT GALRAQFIIECLNDLKRNLVKRGLDLLIQHGKPEDIVPSLAKAYKAHTVYAHKETCSEEVKVEK MVTRNLQKLVS PSSGGIGNDPGSGNTT KLELVWGSTMHYHIDDL PFDCESLPDVYTQFRKSVEYKSKVRNCTKLPTSFGPPPEVGDWGHVPQVSELGLQQE KVS KGMNFVGGESAALGRVHDYFWKKDLLKVYKETRNGMLGADYSTKFS PWLASGSLSPRFIYE EVKRYEKERLSNDSTYWVLFELIWRDYFRFLSIKLANLLFQAGGPQKVNINWSQDQTMFD AWRRGQTGYPLIDANMKELAA TGYMSNRGRQIVCSFLVRDMGIDWRMGAEFETCLLDYDPCS NYGNW TYGAGVGNDPREDRYFSIPKQAQNYDPEGEFVAYWLPELRALPREKRHSPGMMYLNPIVALKHGYTKKTGDSKTAFSSRRGRPEDNRRKRHG Y

>Solanum\_lyc\_XP\_004252323.1\_(6-4)DNA\_p

MASGANSLMWFRKGLRLHDNPAL EYAAKGSKFLYPVFVIDPHYMDPDPTAFSLGSSKAGLNRIQFLLES LADLDLSLKKVGSRLLV LKGDPEGELLIRCLKEWSIGKLCFEYDTEPY YQALDEKVKGYVSGTGVEIFSPVSHTLYNP ADIIHKNGGSPPLSYQSFLKLAGQPSWAATPLSTTISSLP RIGNTGSAFVSEVPTVRELGYEDLPEDKTPFK GGSEALKRLRESIANKEWVANFEKPKGNPSAFLKPATTVLSPYLKFGCLSSRYFYQCIQDILKCSKKHTSPP VSLLGQLLWRDFFYTAAFGT PNFQMKGNRICKQIPWKND DKLAAWRDSKTGFPWIDAIMVQLRKWGWIHHL ARHSVACFLTRGDLFVHWERGRHVFERLLIDSDWAINNGNWLWLS CSSSFFYQYNRIYSPISFGKKYDPAGNYIRHFLPVLKDMPKEYIYEPWTAPISVQRKAKCIIIGVDY PKPVVSHDSASKECKMRLGEAYALNKKLNLVSEED LNELRRKADNESTTLD SVSRKKKQKLID

>Solanum\_lyc\_XP\_010325452.1\_photolyase

MASAI PVVQSGRIRVVKQGSGLVGPVVYWMFRDQ RIRDNWALIHAVDQANKANVPVAIAFN LFDQFLGAKARQLGFMLRGLLEKLQGNLESTLRIPFFLFQGEAIDTIPNFLKECGASLLVTD FSPLRDVRSWKEKICERVDES VT VHEVDAHNI VPLWVASNKLEYSARTIRGKINKLLPEYLIELPAIEPLKIKWSSSNAPIDWPKLVS DVVRKGAE VPELEWCEPGE DAAFEVLMSGSKGFLTTRLKTYSTDRN NPLKPQALSGLSPYLHFGQIS AQRCAL EANKVRKNYTQAVDTFLEEMIVRRELSDNFCYYQPQYD SLLGAWEWARKTLM EHASDKREHIYTREQLEKAQTADVCFGQL WNASQLEMVHYGKMHGFM RMYWAKKILEWTNGPEEALAITIYLN DKYHIDGRDPSGYVGC MWSICGVHDQGWERPVFGKIRYMNYAGCKKKFNVDGYISYVKRLVGESK KRKAEVILDKKAKELRN

>Solea\_sene\_KAG7458369.1

MRKRTSPPLSLFGQLLWREFFYT AATNNPNFDRMEGNPICVQIPWDQNPEALAKWAEGRTGFPWIDAIMTQLR QEGWIHHLARH AVACFLTRGDLWITWESGMKVFEELLLDADWSVNAGSMMWLS CSAFFQQFFHCYCPVGFGRRTDP SGDIIRRYVPVLKDYPNRYIYEPWNAPE SLQKAANC VGVDPKPKMINHAEGSR LNIERMKQVYQQLSHY RGLSLLASVPTIQEEAEPPMTDESQTSSGPDSPRPVHREPAICSPAPDSSIVCGSSSSSGDACSLOT LHSS SQPSPAATSKSAAAAPPPASSPVHSPLNLPS PSSSCPTLSPAPSLAATS AQTFFPKRKGPAHKVCRSRRLRGS RSREEGGGGEEEEEEETGAEEKMEEDVEEE EKMEED

>Solea\_sene\_KAG7481848.1

MKRTGWCKFEKPQTSPNSLSPSTTVLSPYVTIGCLSARTFWWRLTEVYRGNKHS DPPVSLHGQLLWREFFYT ASVGIPN FNKMEGNTVCTQVDWDTNSEYLA AWREARTGFPFIDAIMTQLRQEGWIHHLARH AVACFLTRGDLWISWEEGQKVFEKLLLDGDWALNAGNWQWLSASTFFHQFFRVYSPVAFGKKT DKHGDYIKKYLP LLKKFPAEYIYEPWKAPRSVQQAAGCIVGKDYPQPIVQHEVISKKNIQRMKLAYAKRSADKTASPSKKQGVKRKTSVVDMLKK NKR

>Solea\_sene\_XP\_043877840.1

MVINTIHWFRKGLRLHDNP SLKDSLLGADTVRCIYILDPWFAGSSNVGINRWRFL LQSLLEDLDSLRKLNSRL FVIRGQPTDVFPRLFKEWKINRLSYEYDSEPF GKERDAAIKKLASEAAVEVIVRTSHTLYDL DKKIIE LNGGQSPLTYKRFQTLISRMDAVEVPAESITGDVMGKCTTPLSDEHDDKFGVPSLEELGFDTEGLASAVWPGGESEALTRLERHLERKAWVANFERPRMNANSLASPTGLSPYLRFGLSCRLFYFKLTDLYRKVKKNSSPPLSLY GQLLWREFFYT AATNNPCFDKMESNPICVQIPWDRNAEALAKWAEGRS GFPPWIDAIMTQLRQEGWIHHLARH AVACFLTRGDLWISWEEGMKVFEELLLDADWSVNAGSMMWLS CSAFFQQFFHCYCPVGFGRRTDPNGDIIRRYLPILRG FPAKYIYDPWNAPE SVQKAACCIIGVHYPKPMVNHA EASRLNIERMKQIYQQLSCYRGLGLLASVPSNPSGHG HGNEVSEASSDAMAFHAEATPTAAAPSSYQMPAHSQGDWQSGVMLYLQGD SQTNAGTHQQGYASTSTSSMMC YTPGAQQISGPLIQKGLDHHSISHTSGKRHIKESGNGKSSKIQRQSTH

>Solea\_sene\_XP\_043878427.1

MICIWRSSLSSFSRRLKLIVDGNRRPRQSLVPLIEAYTCEPTMSGKKRKATSAAKVASAKQQKLVPTKEEK QKAGGWLHDLVTQQRSENQEMKFNKKRCRFISDTEKIKQGSEGVLYWM LRDQRVQDNWALT YAQRLAVKENLP

LHICYCLDVPKSELSTLRHYNFMLKGLEEIAKECKTLDVQFHLLHGSAAEEVVPGFVSDRSLGAVVTDFSPLE  
PLQWLEDMKKTLPKDIPLIQVDSHNIVPCWVASPKLEYAARTIRGKITNLLPEFLTEFPLVEKHPHTATRTAK  
PVDWDKLLASLQVDRVTGEPWAKPGTKAGMAMLESFIDVRLKLFNLRNDPNANALSQSPWIRFGHLSAQ  
VALQVKHSGKSTGHSITSFIEELVVRRELTDNFCFYNNKYDSVEGAYEWAQKTLKDHAQKRPYLYTREQLEK  
AKTHDKLWNAAQYQMVSEGMHGFRLMYWAKKILEWTSPEEALSTALYLNDRYELDGQDPNGFVGCMSICG  
IHDQGWAERDVFGKIRYMNYKGCTRKFDVARFEQKYCPKNL

>Solea\_sene\_\_XP\_043878908.1

MSASSRTIICLLRNDLRLHDNELFHWAQRNAENIVPLYCLDPRHYVGTYNFNFPKTGPFRLRFMLDSIRDLRK  
TLVNKGSNLVVRGKPEDVVAELIKQLGSVSTVAFHEEVTSEELSVEKNVKDVCARMKVKVHTCWGSTLYHRD  
DLPFHHVSRPLPDVYTQFRKAVETQSSVRPVFPTPEQLKPLPPGLDEGAIPTAVDLQQTPEVTDPRSAPFCTGG  
ESQALARVQHYFWDNAVASYKETRNLIGADYSTKFAPWLAIGCISPRYIYHQIKQYERERTANQSTYWVIF  
ELLWRDYFKFVAAKYGNRLFQVKGLQDKSVPWKKDMKLFNAWKEGRTGVFPVDANMRELAQTGFMSNRGRQNV  
ASFLTCKDLGLDWRMGAEWFEYLLVDHDVCSNYGNWLYSAGVGNDPRENKFNMIKQGLDYDNNGDYVRQWVPE  
LQGIRGGDVHTPWTLSATLSHAHVSLGETYPTPVVMAPEWSRHANKKASASGPSRGRKGPSHTPKQHGNRG  
IDFYFSRSKNL

>Solea\_sene\_\_XP\_043891818.1

MPPSAAGAEERRAYVRKLLREVLVGREDPEGFFAMCVSVLGHQDTRSHFLTLIQPLTTANSTLHSGLTISIYQD  
YFSKTEDEEELALALSULEMKDDQLPTPVQEPGQGQTDSSRVQLTSVQGPPQGSRHTQLTDRSGGRKKGAWGM  
ACPLKNPQETELQKNTQTAAACQTVCVASPCASLSKQETDLEGDERTEEGDSIQSGKTKRSNRKRQAVGQ  
QVVGLPCSPSAAAPVLLWCRRDLRLCDNPALIGSLEVGAQVPIPVFIWSPPEEEGPGITVAMGGACKYWLHQA  
SHFRSSLEGIGSHLVFLKADGAGSGLGSSLSLKLKLVKETGARTVMANALYEPWLKERDDEVVSALQKGGVQC  
RMFHSYCLRDYPVSSTEGVGLRGIGSVSHFMSCCRQNPSTALGAPLDPPGSLPTPATWPQGVSLDTLELAMP  
RRKDGSTIDWAANIRNSWDFSEEGAARLEAFLQDGVYRYEKESGRADEPNTSCVSPYLHFGQLSPRWLLWDA  
KGARCRPPKFQRKLAWRDLAYWQLTLFPDLPWESLRPPYKALRWSTDRRHLKAWQGRGTGYPLVDAAMRQLWL  
TGWMNNMYMRHVVASFLIAYLHLPWQEGYRWFQDTLVDADVAIDAMMWQNGGMCGLDHWNFVMHPVDAAMTCDP  
CGNYVRKWCPELADLPDELIHKPWKCPVSMRLRRAGVVIGQTYPERVISDLEEQRSLKDVAVVRKRFQGYVD  
KRTGCDLVPLPRLVTEALGPSHNGGIVAEGKQFLLPVITRMEFKHLADPDSDAASNYPNAVLYKGYVSRKR  
DETIAFLNERDFTASVLHEGAQRERLESQRRMEGLPRPPAPPSRARRTPKAKDKFSVVPGGAVTSLT

>Sorex\_aran\_\_XP\_004619154.1

MKMAKEAGVEVVTENSHTLYDLDRIIELNGQKPPLTYKRFQAIIGRMELPRKPVGSVSRQQMESCRAEIQENH  
DETYGVPSLEGLGFTEGLGPAVWQGGETEALARLDKHLERKAWVANYERPRMNANSLLASPTGLSPYLRFGC  
LSCRLFYYSWLDLYKKVKRSSTPPLSLFGQLLWREFFFYTAATNNPRFDRMEGNPICIQIPWDRNPEALAKWAE  
GKTGFPWIDAIMTQLRQEGWIHHLARHAVACFLTRGDLWVSWESGVRVFDLILLDADFVSNAGSWMWLSCSAF  
FQQFFHCYCPVGFGRRTDPSGDYIRRYLPKLKGFPSRYIYEPWNAPEAVQKAAKCVIGVDYPRPMVNHAETSR  
LNIERMKQIYQQLSRYRGLCLLASVPSCVEELSNPMAEPSSGQAGSSAGPRSVPGGPSSPKRKLAAEEPPGE  
ELSKRARVAGSSTPEPTSSGAAVCSAEAPGASVDAHLSSCHHHAQPATAGSTDRGSEVCMGAGWKKLLQEP  
LLHPSPLQLPSAQLKFLMNLQTGVSVSAGPVEPTHWVAATISGLFPILEGRLCPPVPESRVHFVILSISRST  
CGPCLVLSPDMHATLTDDRQPALVSVRPQELGAGDSAQAEEKTQGDSVDLSQTP

>Sorex\_aran\_\_XP\_012790734.1

MEPLAIPVETITSEVIEKCTTPLSDDHDEKYGVPSLEELGFDTDGLPSAVWPGGETEALTRLERHLERKAWVA  
NFERPRMNANSLLASPTGLSPYLRFGLCLSCRLFYFKLTDLYKKVKNSSPPLSLYGLLWREFFFYTAATNNPR  
FDKMEGNPICVQIPWDKNPEALAKWAEGRGTGFPWIDAIMTQLRQEGWIHHLARHAVACFLTRGDLWISWEEGM  
KVFEELLLDADWSINAGSWMWLSCSSFFQQFFHCYCPVGFGRRTDPNGDYIRRYLPVLRGFPKYIYDPWNA  
EGIQKVAKCLIGVNYPKPMVNHAEASRLNIERMKQIYQQLSRYRGLGLLATVPSNPNGNGGFMGYSPGENASG  
CSSSGSYFQSGILRYAYGDSQQTHLLKQGRSSSCTGLSSGKRPSQEEDRQSPKVQRQTN

>Spadella\_cep\_QNM38094.1\_cry,\_parti

SEVVDRQREDCVAIHWFHRLHDCPAMVEAVERAGTLYPVFIIDGRVAGTWNNGYNRWRFLLECLELDLQ  
LRKSGRLWIFHGDPREIFARLVPLWGVTHVSFELDLPIWQERDCAVTSLLNDMGVEVIGRISYTLWDPREI  
IKANGGSPPLTFGLFMLTTSTMGEPAKPVDEPDWSSVILPIDEAKLGEWRNRNRHVPNLDELGVAEDVPGQK  
NYVWEGGETRALVKKASRLENERKAVAKGQFQTNILRPDLVGASRLSPYFRFGCLSVRAFYHEIMDIFRKEL  
TDDTMNRPRTAVTAQLIWFYFYTMSINNPYFAEIDDPVCLPIPNENEDLLKAWKDGTGFPWIDALQRL  
VLEGWTHHVRHAAACFLTRGHLWQSWVPALHFIKHQIDGDWAVGIGNMMWVSSSAFEKALDCAKCMCPINF  
GRRMDQDGAFFIKKYVPEVRNLPLRYLFSWPKAPENVQKEANCVCVVGKDYPPFIVDYKFSKRNMQWMEDFKTQV  
VERMADHVRPTTYSEEELRLCGLATHSSSTCKACQDRSRPIEDEEENYQDMD

>Sparganum\_pro\_VZI11874.1\_unnamed\_pr

MRVLHWFRKGLRLHDNPALLAALQPLAARPDGGAAPVELLFVFIIDPCLPDHMDIGFRRCSSFLLECLQALDKS  
LASLNPKFRLTLRGRPEEVLPKACLAWGVEHVTYEVDTDAYGRSRDVAVRDLLAQSNISVSEHSGHTLWDLD  
WLRSKYTAPPPSPKRPTENGDGPTNSTSSQQLGVPLTYQSFCALTRRVAPQGPAPRLPSFAEYVSQGIVSSPD  
LEGLRGSFPDLGCSLGAPAAVADMIGPIHYSRVGEGLSDSAAEKQGLLFPGGAEALERLRMPATAPTGLP  
ISTTGLSPYLRYGCLSVRTAWWALREARRAKTPASASQPPVSLHGQLLWREFFFYLVSSVTPNYDRIVANPIC

RQIPWIRNEELLTAWAEARTGFPFIDAAMTQLHRHGWMMHLLARHAVACFLTRGQLWQSWTDGAAVFQRLLLDA  
DWALNSANWMLSASAFFHQYFRVYCPVGFRKTDPEGNFIRHFLPCLKNMPKQYIYEPWTAFLAVQKKAGCI  
IGVDYPARIVDHQEMRAANLVKMKAAAYDACRTAAHNPSKRGTDTSPKPGQLGTGELSANKRKKSWIQSKFGL  
SNLTAIQGKQPSAHTFAWDSKHLNS

>Sparganum\_pro\_VZI21603.1\_unnamed\_pr

MTTATLKASQTVSRVQLGITSFLVKLVRSQSRLSIMASSMRTEEKQSFDDWVAGINLRRSEDAAKSVGEFG  
FATCRVRLLSGNKFKVTFPESASGIKQLDASGAASLNSGADSASVLYWMNRDQRVQDNWALLFAQRVALKFSV  
PLHVCFNLPSSSAISTRHFNFQLAGLKEIATQCKDLNIGFTVLPLMSESSRGTKRTAEGQLVDTAKTGSTFS  
GLNLIRNLQVAALITDFSPLREDTAAVQTVSGLLPSNTSFFQVDAHNIWPAWHASDKLEYAARTIRKLHEK  
SQTLTTEFPPVRAHPIRGNVKEPDWESIEASVVGHLDESVPKIKWAQGGSRHGLRELFTFLHQRLSLYATARN  
DPTKNALSQSPWFHFGHLSVQRAILEAQRRLRRKHKEVDAFIEEAFVRRELSDNFCLYNPHYDSIEGAWPWA  
QETLRKHASDERKPAYDEEAMEKARTDDNLWNAAQROLLRDGKIHGFLRMWAKKILEWHAAGPEAALALGLR  
LNDRYSIDGSDPNGFVGMWSICGIHDQGWSERTIFGKIRYMNYAGCKRKFNVSQFETQYPS

>Sparus\_aura\_XP\_030254933.1

MFGNSLAGNVTDPAPQTGGRCWLTHRTVDVSRTTTAPSSSLKTATMSTARTVICLLRNDLRLHDNELFHWAER  
NAEYIVPLYCFDPRHYVGTRNYNLPKTGPFLRLFLMDSVRDLRNTLLNKGSNLVVRQGPEDVVAALIKQLGS  
VSTVAFHEEITSEELNVEKSVKDVCAQMNKVVHTCWGSTLYHRDDLPHHMSRLPDVYTQFRKAVETQSEVRP  
VFPTPEQLKPLPQGLEEGAIPTAEDLQQTEPVADPRSAFPCSGGESQALARIKHWFWDTDVATYKETRNGLI  
GVDYSTKFAPWLAGCISPRYIYHQIQQYKERTANQSTYVWIFELLWRDYFKFVAVKYGDRLFQIEGLQEK  
IPWKKDMKLFDAWKEGRTGVPFVDANMREVAMTGFMNSNRGRQNVASFLTDLGLDWRMGAEWFEHLLIDHVC  
SNYGNWLYSAGIGNDPRENKRFNMKQGLDYDNNGDYVRQWVPELQGIKGADVHSPWTLSSAALSHAQVTLGE  
TYPTPIVMAPEWSRHVNKKPSGAGPSPRGKRGPSHTPKQHRDRGIDFYFSKKGQ

>Sparus\_aura\_XP\_030258793.1

MFFCFWRSSFIPIFAPRPLRLVAQGSQSAFVFTSRTIMSDKKRKSXSAAAGPRAKQQKVAHVKEEKRERAAG  
WLQDFLQQQRTTEEKEMKLNKKRIRVISATEKIKQSGSEGLVYWMNRDHRVQDNWALIHAQRLAVKEKLPLHVCA  
CLNVPKSELSTLRHYSFMLKGLEEVAEECKSLDIQFHLHGTAGEVLPGFVSDRVLGAVVTDDFSPLREPLQWL  
EDIKKKLPKDIPLIQVDAHNVVPCWEASPKLEYSARTIRGKITKILSDFLTDFPPVEKHYPYTATRTAKPVDWE  
QTLASLEVDKTVGETEWAKPGTKAGTAMLESFIDLRLKIFDTKRNDPNAPALSQSPWIRFGHLSAQVAQQV  
QHSGKKVGVTVSSYIEELVVRRELTDFNFCFYNNKYDSVEGAHEWAQKTLRDHAKDERPYIYTREOLEKAKTHD  
KLWNAAQYQMVTEGKMHGFLRMWAKKILEWTSSPEEALSIALYLNDRYELDGDQPNGFVGMWSICGVHDQ  
WAERPFIKIRYMNYKGLRKFQVAFQFERTYSPKNL

>Sparus\_aura\_XP\_030271124.1

MAHTCVHWFRLRLHDNPALMAALRDCKELYPVFVLDPNLHNNTCVGINRWRFLIGALKDLDCSLRKLNSRL  
FVVRGKPEDVFTLFWNEWKVTCLTYEYDTEPYSVRDKTVMALAKEHGVVEVIYKVSHTLYDIDRIIEENNGKP  
PLTYNRMQAIKVTGLGPPKKPIPAPTMENMKDVQTPCESSEKKGIGIPTLEELDQDAAALGEDKFPGGEQEALR  
RLDEHMKKTGWVCGFEKPQTSPLNSPSTTVLSPYVTIGCLSAFTFWRLTDVYQGGKHSPPVSLHGQLLWR  
EFFYTASVGIPNFKMEGNSVCTQVDWDSNPEYLAAREARTGFPFIDAIMTQLRQEGWIHLLARHAVACFLT  
RGDLWINWEEGQRVFEELLDGDWALNAGNWQWLSASTFFHQFFRVYSPVAFGKKTDKNGDYIKKYLPLKKF  
PAQYIYEPWKAPHSVQQAAGCIVGKDYPHPIVTHEDISKTNIQRMKLAYSKRSDPGASPSKKQGVKRKAPT  
VDMLKKKSKK

>Sparus\_aura\_XP\_030281971.1

MHHKTEDDELELALALSLEMKDHLRLSTPSQDSPPQPGDRPNQRRFVQLASVTQPPQGSSHAQLADVVRGKN  
TNSSRGAPWVKSSPPQTTRETGLQESAHVYKCNKETPGTSKTECVSRLSGSISKQATGEEDNQMDVGDLTES  
QKPKRSKNRRQRRKGAGQQVVGGLPCSPSAQPPVLLWFRDLRLCDNPALIGSLEAGAPVIPVFIWSPEEEEGP  
GITVAMGGACKYWLHQALSCFSSSLESIGSHLVFLKANRERSGVGSSVHTLKLVLKETGARTVVANALYEPWL  
KERDDAVVSALQKDGVECKMFDSCYCLKDPYSVSTEGVGLRGIGSVSHYMSCCSQNPGSALGAPLDPGSLPAP  
SNWPQGVSLDTLGLARMPRRKDGTIDWAANIRKAWDFSEGAHARLEAFLQDGVYRYEKESGRADAPNTSSL  
SPYLHFGQLSPRWLLWDAKGARCRPPKFQKRLAWRDLAYWQLTLFPDLPWESLRPPYKALRWSSDRGHLKAWQ  
RGRTGYPLVDAAMRQLWLTGWMNNYMRHVVASFLIAYLHLPWQEGYRWFQDTLVDADVAIDAMMWQNGGMCGL  
DHNFMVMPVDAAMTCDPCGSYVRKWCPELADLPDELIHKPWKCPASMLRRSGVVFQGTYPERVVTDLEERT  
QSLHDVAVVRKKFGQYVDKRSGLDVLPLPQRLVSEALGLSHSDGGVVTGKQFLLPVITRMEFKHQLEDPDAD  
AASNYPNAVLRKGYVSRKRDETI AFLNERDFTTSVMYEGTQRRERLES DYRRMEGLPRPAAPRGRARRPTIAKD  
RFSVVPGGAVTSLR

>Sparus\_aura\_XP\_030282112.1

MVVNTVHWFRLRLHDNPRLRESIRGADSLRCIYILDPWFAGSSNVGINRWRFLQLCLEDLDASLRKLNSRL  
FVIRGQPTDVFPRLFKWQINRLSYEYDSEPFGERDAAIQKLACEAGVEVTVLNSHTLYDLSRIIEINDGHP  
PLTYKRFQGLINRMDAVELPAETVTLEVLKCDTPVSDDHDDKFGVPSLEELGFDTDGLATAVWPGGETEALM  
RLERHLERKAWVANFERPRMNANSLASPTGLSPYLRFGCLSCRLFYFKLTDLYKKVKKDNNPPLSLYGQLLW  
REFFYATATNNPCFDKMEGNPMCVQIPWDRNPEALAKWAEGRGFPWIDAIMTQLRQEGWIHLLARHAVACFL  
TRGDLWLSWEEGMKTFEELLIDADWSVNAGSWMWLSLSCSSFFQQFFHCYCPVGFRRTDPNGDFIRRYLPVLKG

FPAQYIYEPWNAPEELQKSVKCIIGVHYPKPMVNHAEASRVNIERMKQIYQQLSCYRGLGLLATVPVNPBHDGT  
NRSNVGRVNTCGSSENLSMLGGTSRTERWHGAQKRRCEDSPLESSCKSWRQSK

>Sparus\_aura\_\_XP\_030282812.1

MVVNSVHWFRKGLRLHDNPALQEALNGADTVRCVYILDWPWFAGAANVGINRWRFLLEALEDLDNSLKKLNSRL  
FVVRGQPTDVFPRLLKEWKVTRLTFEYDPEPYGKERDGAIMKMAQEFVETIVRNSHTLYNLDRIIEMNNNSP  
PLTFKRQFQTIIVSRLELPRRPLPPITQQQMDKCRKTMADNHDQLYSIPSLEELGFRTEGLPPAIWQGGGESEALD  
RLNKHLDKKVWVANLEHPRVNTCSLYASPTGLSPYLRFGCLSCRVLYYNLRELYMKLRKRCSPPLSLFGQLLW  
REFFYTAATNNPNFDRMDGNPICVQIPWDQNPEALAKWAEGRGTGFPWIDAIMTQLRQEGWIHHLARHAVACFL  
TRGDLWVSWESGMRVFEELLLDADWSVNAGSMMWLSCSAFFQQFFHCYCPVGFGRRTDPSGDYIRRYIPIILKD  
YPNRYIYEPWNAPEVQKAANCVVGVNYPKPMINHAEGSRLNIERMKQVYQQLSHYRGLSLLASVPTIQEEAE  
PPMTDESQTSSGPDSPPRGPADSEAAGCSTAPDSSTVCASSTYALHPDLKDKGDNYPSKKPYTSSGSLTQSSA  
AITSTFASHPPAPLSPAQSPLSRKSPSSSSCPTFAESPSPTTAPTQTSSSLGQRRKGLAHKVRRSQRQRGRQ  
SWTLAPREGGRKSEEEEEEEAGGEERMEEDVEQDEERMEEEPSEETAGQQQ

>Sphaeramia\_orbi\_\_XP\_029978740.1

MSTSRTIIYLLRNDLRLHDNEVFHWAQRNAECIVPLYCFDPRHYGGTYHYNLPKTGPFRLRFLLESIRDLRKT  
LLNKGSNLVVRGKPEDVVADLIKQLGSVSTVAFHEEVASEELNVEKKLKDVCAMKVKVHTCWGSTLYHRDD  
LPFHHMSRLPDVYTQFRKAVETQSRVRPVFPTPEQLKPVPPGLDEGAIPTAEDLEQTEPPTDPRSAFPCSGGE  
SDALARLKHIFYWDTNAVATYKETRNGLIGADYSTKFAPWLAIGCISPRYIYHQIKQYEMERTANQSTYWVIFE  
LLWRDYFKFVGKYGYNRLFHIKGLQDKSVPRKDMKQFNAWKEGRTGVPFVDANMRELAMTGFMSNRGRQNV  
SFLTKDLGLDWRMGAEWFEYMLIDYDVCSNYGNWLYSAGIGNDPRENKFNMIKQGLDYDNNGEFVRQWVPEL  
RGLKGSVDVHTPWTLSAALSHAVTLGDTYPTPIIIAPEWSRHINSKAGGSGPSSRGKKGPSHTSKQHRDRGI  
DFYFSRSKNM

>Sphaeramia\_orbi\_\_XP\_029986858.1

MAHTCIHWFRKGLRLHDNPALMAALRDCKEIPVFILDPYLHNDTCVGINRWRFLIGALKDLDCSLKKLNSRL  
FVLRGKPEDVFPKLFDKWKVTKLTYEYDTEPYSLSRDKTVTKLAKEHGVETIYKVSHTLYDIDRIIEENNGKA  
PLTYNRMQAIVNSLGPVKRPVPAPSAEDMKDVKTPYSEDHEKNYGIPTLEELGLDTSSLTEELFPGGEQEALK  
RIDEHMTRTAWVCSFEKPQTSPLSLMPSTTVLSPYVTFGCLSARTFWWRLTEVYQGGKHSSPPVSLHGQLLWR  
EFFYTASVGIPNFKMEGNPVCTQVDWDTNSEYLTAWREARTGFPFIDAIMTQLRQEGWIHHLARHAVACFLT  
RGDLWISWEEGQRVFEELLLDGDWALNAGNWQWLSASAFFHQFFRVYSPIAFGKKTDKNGAYIKKYLPLKKF  
PPEYIYEPWKAAPRSIQQAAGCIVGKDYPLPIVQHEIISKKNIQRMKLAYAKRSTDTADSPSKKKGEKRKAPSV  
VDMKKKKGRN

>Sphaeramia\_orbi\_\_XP\_029991901.1

MVVNTIHWFRKGLRLHDNSSLRDSIRGADTLRCIYILDWPWFAGSSNVGINRWRFLQLCLEDLDASLRKLNSRL  
FVIRGQPTDVFPRLFKEWQITRLSYEYDSEFPFGKERDAAIQKLASEAGVELMVKISHTLYNLDKIIELNGGQP  
PLTYKRQFQALINRMDPVELPAETITCEVIKRCATPISDDHDDKYGVPSLEELGFETEGLTAVWPGGETEALM  
RLERHLERKAWVANFERPRMNANSLASPTGLSPYLRFGCLSCRFLYFKLTDLYRKVKKNRTPPLSLYGQLLW  
REFFYTATNNPCFDKMDGNPVCVQIPWDRNPEALAKWAEGRGTGFPWIDAIMTQLRQEGWIHHLARHAVACFL  
TRGDLWISWEEGMKVFEELLLDADWSVNAGSMMWLSCSSFFQQFFHCYCPVGFGRRTDPNGDYIRRYLPVLRG  
FPAKYIYDPCNAPEEVQKAAKCIIGVHYPKPMVNHAEASRNIERMKQIYQQLSCYRGLGLLATVPANPNNGS  
NDSAGSSQGPASAEADTSTQEAAPSRIDRGQSTQKRRREEALPESSSKSWKQSK

>Sphaeramia\_orbi\_\_XP\_029991988.1

MVVNSVHWFRKGLRLHDNPALLEALNGADTVRCVYILDWPWFAGAANVGINRWRFLLEALEDLDSLLKKLNSRL  
FVIRGQPTDVFPRLFKEWKVTRLTFEYDPEPYGKERDGAIIKMAQEFVETIVRNSHTLYNLDRIIEMNNNSP  
PLTFKRQFQTIIVSRLELPRRPLAPITRQQMDKCCSKI SDNHDQLYNIPSLLEELGFQTSGLPPAVWRGGESEALD  
RLGKHLDRKVWVANIEHPRVSTCSLYASPTGLSPYLRFGCLSCRVLYYNLRELYMKLRKRCSPPLSLFGQLLW  
REFFYTAATNNPNFDRMEGNPICVQIPWDQNPEALAKWAEGRGTGFPWIDAIMTQLRQEGWIHHLARHAVACFL  
TRGDLWISWESGMKVFEELLLDADWSVNAGSMMWLSCSAFFQQFFHCYCPVGFGRRTDPSGDYIRRYIPIILKY  
YPNRYIYEPWNAPEVQQAANCVVGVHYPKPMINHAEGSRLNIERMKQVYQQLSHYRGLSLLASVPTIQEEAE  
PPMTDESQTSSGPDSPPRVPSGDEAAPDSSTACPSPTCSAAVQHPSPEETLSNQQTAAAISSSTSSGPPPLAA  
APPSPSSPLSRKSPSSSSSCPSLSPAPSPAAAPPPRASTLGTRRKGMARKMRRSQRQRGRQICAMTTREGGG  
REEEEEERDDEKMEEDAEPPEEEERMEEGTSGGASGHQQ

>Sphaeramia\_orbi\_\_XP\_029993416.1

MSPLAAASGDDSKALVRKMLREVLVGREDEPGEFFALCVSVLGYQDTRSQFLSLIQPLSTANRSLHSTLTISIYK  
EYFKAEDDDLQALALSLDTEQMSVCSQGSQHQQINGSSSQSSLQATSVSHTQGGYSQIAAIRSQKRN  
ASSLQSGHHSKMSPQETAQNCDLDKDTQELKMSPMVCVSRQSSSFQKQDTCQGGVQMMKEGDSNELEKPKRSR  
NRRQRRKGGDKQVGVPCSPSGLPPVLLWFRDLRLCDNPAIIGSLEVGAIPVPIFIWSPPEEEEGPGMTVAIG  
GACKYWLHQALSCLSSSLERIGSHLVFLKANGEGNDVGSSSLHTLRELVKVTGARTVLANALYEPWLKDRDDKV  
VSALQKDGVECKMYHSYCLRDYPYSVSTKGVLGRIGSVSHFMSCKQNPQSAIGVPLDPPELPTPAHWPOGV  
SLDMLGLARMPRRKDGTVIDWAANIRKSWDFSEEGAQVRLEAFLQDGVYRYEKESGRADAPNTSCLSPYLHFG  
QLSPRWLLWDAKARCPKFKQKLAWRDLAYWQLTLFPDLPWESLRPPYKALRWSNDRGHLKAWQGRGTGYP

LVDAAMRQLWLTGWMNNYMRHVVASFLIAYLHLPWQEGYRWFQDTLVDADVAIDAMMWQNGGMCGLDHWNFVM  
HPVDAAMTCDPNGSFVRKWCPELANLPDDLHHPKWPKPASMLRRAGVLFQGYPERIVTDLEGQRSQSLQDVA  
LVRKEYGQYVDKRTGCDLVPLPPRLVSEALGLSHQEEGAVTVGKQFLLPVITRMEFKHQLEDPDADAASNPNY  
AVLKGYSRKRDETI AFLNERDFTASVMYEGAQRKERMESDYRRMQGLPRPPAPRGRARRTP TAKDKFSIVPG  
GVVTSLR

>Sphaeramia\_orbi\_\_XP\_030015659.1

MPPPCSNWLRKKGQRAVTCVFLWTAKNTVHFFGRRLRFASSDKII IQCLLSCVWRNPSSFSSAPRKFLKLVGHST  
QSRRSPLSGLTISFTTETIMSDKKRKATNDTAPEQHSKQPKLATKKDEKVGWGIQDLVVQQRIEKKGMKFNKK  
RLRFLSDTEKIKQGSEGVLYWMSRDQVRQDNWALHAQRLAEEEEKLPLHICFCLVVPKSELSTLRHFSFMLKG  
LEEVSKECKKLDIQFHLLHGPAGDVLPGFVSDRGIGAVVTDFSPLEPLKWLDDVKKLPKDIPFIQVDAHNI  
VPCWVASPKLEYSARTIRGKITNLLPEFLTGFPPVEKHSYTATRTAKSVDWAKTLDLSLQVDRVTGGEPEWAVPG  
TKAGMAMLESFIDVRLKLFGTQRNDPNVAALSQSPWIRFGHLSAQRV ALQVQVRSQGNASQSI PSFIEELVIR  
RELTDNFCFYNNKKYDSVEGAYEWAQKTLKDHAQDKREYLYTREQLEKAKTHDKLWNGAQYQMVTEGKMHGFLR  
MYWAKKILEWTTSPPEALSIALYLNDRYELDQDPNGFVGCWMSICGIHDQGWAEPRVFGKIRYMNYKGCLRK  
FDVARFEKKYCPKNL

>Sphaeroforma\_arcXP\_014160934.1

MRFNFIIISRFPARFNTYRSQSVKQSKCPWQFCSAHKQKVSNLDFYARALGINSLPQFQSNVCSSQLFYSTMKG  
RARSGRDSVEDVREVKKLSVKRTVEEKVNSARVRLNGKQNI GKIVEVEEGHKTVIYWMERDVRVNDNWALL  
YAEELAQKNKLTLSVVVYPERYREEATVRQELFRLRGLQEVSRLQGLNIPFHFVLVGDVAKNIVDQIDKLDA  
AVVVVDFHALRQKRKWRDSVAEKVCSIPVMEVDAHNVVPVWGTSEKCEYGARTIRTKIHKRLAEFGTEFPEVE  
VQEGDVEDAAEEVDWDEIMNVDADHDVPEVKWCTPGEAGAMEALETFVNERLQLFARDRNDPNVHASSDLSCF  
FNFGQLSAQRAFLVVQTFSGSVQKGRESFIEESIVRRELSDNFCFYKPDYDTLEGAPGWAQESLEKHTEDKR  
EYTYTSDEFAGKNTHDDLWNAALQMVVEEGKMHGFLRMYWAKKILEWTQTPQTALKTALYLNDKYEIDGYDPN  
GYVGCISIGGVHDQGWMMERSVFGKVRYMNYNGCLRKFNVEYFVQYPPQAVKNCKAQGGTPTKEKHSKKKK

>Sphaeroforma\_arc\_XP\_014156447.1\_SARC\_05172

MPGAIFWFRKGLRLHDNKALIAAVESRGKKVYPVYVLDPKFVNPKQMGLNRLRFLLECLLDLDYSLRTHNSR  
LIVLRGDPTTVIPEQIEAWDVDRLVYEDEPEPHNVERDEAIKAVLKESNSACL VYCTPGHTIWDPKYLLKINN  
GKPPLTMQSFTTLAEKKADPPARPINAPTA EAMQLMLPRDVPETDKAEGDMYSVPVVENVKDFVALYSSLGVN  
GDQCTIDEADEKENNAGTPIVKGGETEALKRLSIKVNNRHTWVATFAKPD TAPTAFDPPSTTILSPYLANGSI  
SPRLFYAAILDCYEKNRKENGHAHTKSPTSLMAQLYWREFFTL CGRELPHFGAMVGN SICKQIPWSRDMALLR  
AWEKSHTGFPWIDSVMTQLRTTGWIHHLARHSVACFLTRGDLWVHWEMGRDAFERHLLDADWSLNNANWMLWS  
ASGFFHQFYRVYSPIAWPKKTDPNGDHVRHFVPVLKDMPKKYIYEPWLA PLTVQKKANCIIGKDYPPVVDHN  
TVKNANLTKMKDAYGRHSDGKINWEEDVAQNVSNADKVIQT TIGIGEYEVSKDTHNSGKRKAVAAPSEVDSDE  
NTVKVEGQSSAPKKDKAKDINSKPTRGNRSKILRQTTFE

>Spheniscus\_mend\_\_KAF1408180.1

WFASENKCFFTISSRFLQLCEDLDANLRKLNLSRLFVIRGQPADVFPRLFKEWNI AKLSIEYDSEPFGERDA  
AIKKLASEAGVEVIVRISHTLYDLDKIIELNGGQPLTYKRFQTLISRMEPLEMPVETITPEVMEKCTTPVSD  
DHDEKYGVPSLEELGFDTDGLPSAVWPGGETEALTRLERHLERKAWVANFERPRMNANSLLASPTGLSPYLRF  
GCLSCRLFYFKLTDLYKKVKKNSSPPLSLYGQLLWREFFYTAATNNPRFDKMEGNPICVQIPWDKNPEALAKW  
AEGRTGFPWIDAIMTQLRQEGWIHHLARHAVACFLTRGDLWISWEEGMKVFEELLLDADWSVNAGSWMWLSCS  
SFFQQFFHCYCPVGFGRRTDPNGDYIRRYLPVLRGFP AKYIYDPWNAPESVQKAAKCIIGVNYPKPMVNHA EA  
SRLNIERMKQIYQQLSRYRGLGLLATVPSNPNGNGGGLMGYSPGESISGCGSTGGHLFPASPGAQLGTGDGH  
TVVQPCALGD SHIGASGIQQQGYCQTSSILHYAHGDNQQSHLLQAGRTALGTGISAGKRPNPEEETQSVGPKV  
QRQSTN

>Spheniscus\_mend\_\_KAF1420273.1

MPHRTIHLFRKGLRLHDNPTLLAALESSEVVYPVYILDRKFLTSMVHIGDLRWHFLLQSLEDLQKNLCQLGSC  
LLVIQGEYESVLRDHIQKWNITQVTLDAEMEPFYKEMEANIRRLGEELGFEVLSLVGHSLYDTRKRI DLNGGT  
PPLTYKRFHLHLSLLGDPEVPVRNLTAEDFQRCRPPDPGLAECYRVPLPVDL KISLESLS PWRGGETEGLQRL  
EQHLTDQGWVASFTTKPRTIPNSLLPSTTGLSPYFSMGCLSVRTFFYRLSNIYAQAKHSLPPVSLQGQLLWRE  
FFYTVASATPNFTKMAGNPICLQINWCEDAERLHKWKT AQTGFPWIDAIMTQLRQEGWIHHLARHAVACFLTR  
GDLWISWEEGMKVFEELLLDADYSINAGNWMWLSASAFFHQYTRIFCPVRFGRRTPDEGQYIRKYLPI LKNFP  
SKYIYEPWTASEEEQKQAGCIIGQDYFPFMVNHKEASDHN LQLMKQVREEQYRTAQLTR

>Spheniscus\_mend\_\_KAF1453987.1

HLAYFVSRIIEELNGHKPPLTYKRFQAIISRMELPKKPVSTVMSQQMETCKVDIQENHDDVYGVPSLEELGFPT  
DGLAPAVWQGGETEALARLDKHLERKAWVANFERPRMNANSLLASPTGLSPYLRF GCLSCRLFYRLWELYKK  
VKRNSMPPLSLYGQLLWREFFYTAATNNPKFDRMEGNPICIQIPWDKNPEALAKWAEGKTGFPWIDAIMTQLR  
QEGWIHHLARHAVACFLTRGDLWISWESGVRVFDELLLDADFSVNAGSWMWLSCSAFFQQFFHCYCPVGFGR  
TDPGSDYVKRYLPKLKGFPSRYIYEPWNAPESVQKAAKCIIGVDYPKPMVNHAETSRLNIERMKQIYQQLSRY  
RGLCLLASVPSCVEDLSGPVADSASGQGCSTGTAVRLSQADQASPKRKHEGAEEELCTEELYKRAKVTCLPAPE  
IPGKSS

>Sphingomonas\_sp.\_RZM33948.1\_photolyase

MTTPVLLWLRQDLRLHDPALVAATQEGPVI PVYILDDDAPGDWAIGGAQRWWLHHSLEAFKSLDKKGSRLI  
LRRGDDVATLRLMTETGAERVFATRQYEPWWRKAEDALGDAICLHDGNQLARVESVTTGAGGQFRVYSSFWK  
ALSQMMPPPEPVAMPKRKIDAPETWPESDALESWELLPTKPDWSSGGFSDWRPGEDAARKAVARFADVADDYDHD  
RNIPSTEGTSRLSPHLHFGEISPRQVWHAVSGHGDGVTTFRKEVAWRDFTQGVVLLALPDYGRRNGRPAFDALP  
WRTGKAAASDLKAWQTGRGTGYPIVDAGMRQLWATGWMHNRVRMITASFLVKHLLLDWREGERWFWDCLVADY  
GNSVNWQWVAGTGVDSNMFGRIAPLSQSEKFDAGDYIRQWVPELAKVTGDAIHDPDESGCRPRDYPAKIIG  
HREARERALEAGRHR

>Sphingomonas\_sp.\_WP\_128453466.1\_photolyase

MPAILPHSLSSWSEAPRVRAINARDVRPDGRYVLCWLQQALRARDNPVIDAAIHLGNALGLPVIVYHGLREDY  
PYASDRLHRFILGASRDALARECRQRLACVQYVDRADAREKGLVYRLAADSAAVLVEDQPTFVARWQSERFAA  
RIERAVFAVNAACLVPAPVLGDGIGSTTAFRRRHQPVRSDWQETTDAAPAVAPYDGPLPYTPDRLEACSDTDL  
DHLVATAAIDHTLPVSTMFAPAGREGALVHLERLMDTVLPTYAATRNATNPVGASMLSPYLHFGVIGPRDVMA  
TVEAADAPAASKEKFADELLTWREWFHYQARTLPAPERYDRIAEGAQETLEAHAVDPRPDIETLAALLHGETR  
DETWNACQRQFLIDGWMHNNLRMYWGKRIIAMTPDPQTAWATACYLNDRLSLDGRDPSTYGNIAATFGGGSPG  
REGPSVYGKVPTRSDGSTRHRPGGPAWLHAAATRSRPDPAVPSDLPTDLYLAGKSPL

>Spizaetus\_tyra\_\_NXJ47120.1

MPHRTIHLFRKGLRLHDNPTLLAALECEVLYPVYILDRKFMTSVMHIGTLRWHFLLQSLEDLQKNLYKLGSC  
LLVIQGEYESVLRDHIQKWNITQVTLDAEMEPFYKEMEANIRCLGEELGFEVLSLVGHSYNTKRILDNLNSGT  
PPLTYKRFLHILSLLDGPEVPVRNLTAEDFQKCRPPDLGLAECYRVPLPVDLKI TAESLSPWRGGETEGLQRL  
EQHLTQGWVASFTKPRITIPNSLLPSTTGLSPYFSMGCLSVRTFFYRLSNIYAQAKHHSLLPPVSLQGQLLWRE  
FFYTVASATPNFTKMVGNPICLQISWYEDAERLHKWKMAQTGF PWIDAIMTQLRQEGWIHHLARHAVACFLTR  
GDLWISWEEGMKVFEELLLDADYSINAGNMMWLSASAFFHQYTRIFCPIRFGKRTDPEGQYIRKYLPI LKNFP  
SKYIYEPWTATEEEQKQAGCIIGQDYPFPMVNHKEASDHNQLMKQVREEQYRTAQLTRDDTDDPMEMKV KRD  
HSEENVSKGKVARMT

>Spizaetus\_tyra\_\_NXJ48363.1

WFASENKYFFTIPCRFLLQCLEDLDANLRKLNLSRLFVIRGQPADVFPRLFKEWNI AKLSIEYDSEPFGERDA  
AIKKLASEAGVEVIVRISHTLYDLKIIELNGGQPPLTYKRFQTLISRMEPLEMPVETITPEVMEKCTTPVSD  
DHDEKYGVPSLEELGFDTDGLPSAVWPGGETEALTRLERHLERKAWVANFERPRMNANSLLASPTGLSPYLRF  
GCLSCRLFYFKLTDLYKKVKKNSSPPLSLYGQLLWREFFYTAATNNPRFDKMEGNPICVQIPWDKNPEALAKW  
AEGRTGFPWIDAIMTQLRQEGWIHHLARHAVACFLTRGDLWISWEEGMKVFEELLLDADWSVNAGSMMWLS  
SFFQQFFHCYCPVGFGRRTPNGDYIRRYLPVLRGFPKAYIYDPWNAPESVQKAAKCMIGVNYPKPMVNHAEA  
SRLNIERMKQIYQQLSRYRGLGLLATVPSNPNNGNGGMLMGYSPGESISGCGSTGGAQLGTGDGHTV VQPCAL  
GDSHTGASGIQQGYCQASSILHYAHGDNQQSHLLQAGRTALGTGISAGKRPNPEEETQTVGPKVQRQSTN

>Spizaetus\_tyra\_\_NXJ48371.1

QPSSLFSSSVLKVDYDVCSNYGNWLYSAGIGNDPRENKRKFNMIKQGLDYDSNGDYVRLWVPELQGIKGADIHT  
PWALNSAALSQAGVTLGETYPQPVVTAPEWSRHINQKPQGRSPHPRGRRGPAHTPMQHKDRGIDFYF SHKKDV

>Spizaetus\_tyra\_\_NXJ49940.1

MQHSSIHWFRKGLRLHDNPALLAAATDCRHLHPLFILDPSSSHAGTNAWRFLLDALRDL DGSLSREMGSRLFVV  
QGCPEEVFPRLFHAWGTTRLTFEVDTEPSARQHDATVAKLAERHGVEVIQEVSHSTLYDTERVLALNDGKAPLT  
YKGLQSLLASLGPPEKPAPTLTLEHLQGCHTPCQVSHDTEYGVPTLEELGQDPTEVGP HLYPGGERAALARLN  
ALMDRTAWLCSFKKPETEPTSLSPSTTVLSPYLKFGCLSVRTFWWWLDEVYQGREHSQPPVSLHRQLLWREF  
FYTAGAGIPNFD RMVSNPICLQVNWDDNNPQHLRAWREGQTYPFIDAIMTQLRTEGWIHHLARHAVACFLTRG  
DLWISWEEGLKVFEELLLDADWSLNAGNWLWLSGSAFFHRYFHIYSPVAFGKKTRDGDGAYIRKYL PVLKDFPA  
KYIYEPWKAPRTVQEQAGCLVGTHYPQPIVEHGAASKRNLGRMKAARTQK

>Spizaetus\_tyra\_\_NXJ51409.1

DNWAFLYAQRLAFKQELPLHVCFLVPKFLDATIRHYGFMLRGLQEVAEECEGELNIPFHLL LGYAKDVLPTFV  
VEHGVGGLVTDFCPLRLPRQWVEDVRERLPEDVPFAQVDAHNIVPCWVASPKQEYSARTIRGKIHAQLPEFLT  
EFPPVIRHPYPSPCPAEPVAWEACYSSLQVDHTVKEVEWATPGTAAGLAMLQSFIAERLKSFGSHRNDPNKAA  
LSNLSPPWFHFGQVSTQRAILEVQKHRGKYKESVDAFVEEAVVRRELAENFCYNNENYDSVQ GAYDWAQTTLKL  
HTKDKRPFLYKLQELEQGTTHDPLWNAQLQMVREGKMHGFLRMYWAKKILEWTRSP EEALQFAIYLNDRYEL  
DGRDPNGYVGKLQEGGTEQGALS LMAKATVGCLWSICGIHDQGWAERAI FGKIRYMNYAGCKRKF DVGQFERR  
YTPRT

>Spizaetus\_tyra\_\_NXJ54151.1

CVYILDPWFAASSAVGINRWRFLLQSLEDLDNSLRKLNLSRLFVVRGQPTDVFPRLFKEWGVTRLT FEYDSEPF  
GKERDAAIVKLAKEAGVEVVIENSHTLYDLDRIIELNGHKPPLTYKRFQAIISRME LPPKPVSTVISQOMETC  
KVDIQENHDDVYGVPSLEELGFPTDGLAPAVWQGGETEALARLDKHLERKAWVAN YERPRMNANSLLASPTGL  
SPYLRFGLSCRLFYYRLWELYKKVKRNSTPPLSLYGQLLWREFFYTAATNNPKFDRMEGNPICIQIPWDRNP  
EALAKWAEGKTGF PWIDAIMTQLRQEGWIHHLARHAVACFLTRGDLWISWESGVRVFEDELLDADFSVNAGSW  
MWLSCSAFFQQFFHCYCPVGFGRRTPSGDYVKRYLPKLKGFPSRYIYEPWNAPESVQKAAKCIIGVDY PKPM

VNHAETSRLNIERMKQIYQQLSRYRGLCLLASVPSCVEDLSGPVTDASAGQGCSTNTAMRLSQADQASPKRKH  
EGAEELCTEELYKRAKVTGLPTPEIPGKS  
>Sporisorium\_sci\_CDR99981.1\_protein  
MAASKCKDVSPPAKATKPEPHDEDEKVLDPKFAEHPDEDESETSKPPTKRQKKASPTKDDSRSAVINGGSKVA  
NQYGSAYAKAGDGWHRSDFNPSPKGRDTSKTPLDDEAALKAHAPSKSNDESDAKNVVYWMRMHDLRIHDNR  
ALAHASALASARRQKGKGGLIALFTITPADYSAHDRGARRIDFVLRTLASLKNQFDDDLDIPFVVYTHHGAR  
TKLGEKV FALCEKWNVSQLTGNIEYEVDELWRDISMVKSASDKKVAFSLFHDCYVVPGRVLTNDGRPYSVFS  
PWNRRWTDCKISKDSLIEASDPDQRNDKSIHKDSTLSALFNLDTLGDSYGIPDELPGFECKDRAYMAKLWPVD  
GDAPRQVLDFNMKGKGGETALDRPANEPSNKEVGGNAKESRLGRYAEGRNLLNENGTSRISPYLAAGLVSARE  
CLRRTKALTKDRLTVGRDSSGAAMWNTESISFRDFYGHVLAAWPKVCMGHAFITKYEDVVWETDPSTLQAWKEGK  
TGYPIVDAAQRQCIQQGYIHNRRGMISAMFLT KHLHLDWREGERHFSLNFIDQDFASNNGGWQWSASTGTDPQ  
PYFRVFNLSLSQSEKSDPQGDYIRHFVPELKNVKGNAVHDPFHRLSKAEFDKLGYPKPIVEHAEARQALRRYK  
NPGDK  
>Sporisorium\_sci\_CDU23015.1\_related\_to  
MTHNVLI AVLRLNDLRLHDHPIFHLCSDPPTPSNPFQAQPI THVLPVYVYDQRHIEVSAFPSSLKATSSGGGRGS  
TQFAKTRELGIWRTGIHRTSFINESVFDLRDLRGVGSDDLALFAGTPESVIPALVREIRDKGD TVEGVFLGRE  
INTEEVNVQKRLERVLGELQCPFKLFEGKSLIHSRDLGFVPKQLPDVFTHFKQVEGADMFRAPLPAPSKLKPF  
PKVEIADAEGVYALSASKGLDTKEAVQKHLLOPLLDEPVLGHNELLSKVFSNGTINVPHSAFPYKGGETEALR  
RLDHYFNGGKSSPGASYKETRNQMLGADYSTKFAAALAHGLLSPRLIAQKATELDSSTGNANNKAGGYWII FE  
LLWRDYFYFVGWKFDSHLFTLGGIKEQLSPKSAASKTYDWKSTTSLTSRTDPFIRWATAQTGIPLIDANMIEL  
VQTGFMSNRGRQNVASFLT KDLGWNWQQGAEFFESWLVDYDPNSNWGNWQYVAGVGNDPRSSRQFNPIKQGKD  
YDAKGEYVATWIPQLRGVPEQYRHHPTQAGGGSVEGYPNRPMVEQQMWRKHYSNAGGAGGNGARNDGGGGGG  
GGHQNNRS  
>Sporisorium\_sci\_CDW98027.1\_  
MSKVARVLYWFCTDLRLHDSPALQSVLDLKPAAFPVWCWDPNYVYKHRVGINRFRFLLESMTALSR SITSTQ  
SNPQLLVVRGEPTTELLPELWKRWNITHLVIEKDPSAYDRRRDKLILKAAKKNNEVVAVQGHHLVDPEEVVKR  
NKGKPTMSMSTLQKIVADMGDVPKPIDAPKDLPLPTLKDFQAKSLSDTLSELAKSLEGLPHYTGKGREGLSSV  
DLNSTELGGQRNKKVTCTYDTINGKASELSVPTLASLGMDAQKIRDTIKGSEPLALEKLAKICKDAEYVATFA  
KPKTSPGQSAEDPSTTLMSPYLKFGCLSVRKFWWDVEEAKKYKGGSKTGPPENFEWFPVAVPRHNGDMILPRP  
AGDPVSEARLSAYKLGQTGF PWIDALMRQLRLEGWMHHLGRHSVA AFLTRGQCWISWERGAEIFDKYLIDWDP  
CSNPGNWMWLSCSAFFTQYFRLYGLATFP AKYDKTGALVRKYCPELAKFPDKYIYEPFNAPKDVQQKAGCIVG  
KDYFPFMLEKETKGENMERMKICYQANLHGTSKEVLEGGKADEMLGKKHGFKDAPKEFDWNNRPGAKIPDWAK  
APKGEEHTTEGAPKGGNGASTKKDEDEGEAESDGDSDDVYEREEEQKEECGDKKRKAPVKEENGSKSKKK  
>Steatornis\_cari\_\_NWx43228.1  
DNWAFLYAQRLALKQELPLHVCFLVPKFLDATIRHYGFMLKGLREVAEECTELNIPFHLLLG YAKDVLPTFV  
VEHGVGGLVTD FCLRLPQQWVEDVRERLPEDVPFVQVDAHNIVPCWVTS PKQEYSARTIRGKIHTQLPEFLT  
EFPFVICHYPYSSCQAEPI TWEACYSSLQVDRTVKEVEWATPGTAAGLAVLQSFIVERLKSFGSHRNDPNKAA  
LSNLSPW FHFQGVSTQRAILEVQKHRGKYKESVDAFVEEAVRRELAENFCYNEKYDSMQGVYNWAQTTLKL  
HAKDKRPFLYKLQELEQGTTHDPLWNAQLQMVQEGKMHGFLRMYWAKKILEWTHSPEEALQFAIYLNDRYEL  
DGTRGSADTLSPCPAGCLWSICGIHDQGWAERAI FGKIRYMNYTGCKRKF DVGQFERRYAPRM  
>Steatornis\_cari\_\_NWx44729.1  
KVDYHVC SNYGNWLYSAGIGNNPRDNRKLNMIKQGLDYDGNRDYVQLWVP ELQGVKGVDIHTPWALNRTALSQ  
VEVTLGETY PQPVVTAPDWSWHINQRPRGRSPHLRGRRGHAHTPAQH KDRGTDIFYFSRK KDI  
>Steatornis\_cari\_\_NWx45383.1  
MGVNAVHWFRKGLRLHDNPALRECIQGADTVRCVYILDPWFAGSSSVGINRWRFL LQCLEDLDANLRKLNSRL  
FVIRGQPADVF PRLFKEWNI AKLSIEYDSEPF GKERDAAIKKLASEAGVEVIVRISHTLYDLDKI IELNGGQP  
PLTYKRFQTLISRMEPLEMPVETITPEVMEKCTTPVSDDHDEKYGVPSLEELGFDTDGLPSAVWPGGETEALT  
RLERHLERKAWVANFERPRMNANSL LASPTGLSPYLRFGLSCLRFYFKLTDLYKKVKKNSSPPLSLYGQLLW  
REFFYTAATNNPRFDKMEGNPICVQIPWDKNPEALAKWAEGR TGFPWIDAIMTQLRQEGWIHHLARHAVACFL  
TRGDLWISWEEGMKVFEELLLDADWSVNAGSWMWLSCSSFFQQFFHCYCPVGFGRRTPNGDYIRRYLPVLRG  
FPAKYIYDPWNAPESVQKAAKCVIGVNYPKPMVNHA EASRLNIERMKQIYQQLSRYRGLGLLATVPSPNPNNG  
NGGLMGYSPGESISGCGSTGGHLFPASPGAHLGSGDGHTV VQPYALGDSHTGASGIQQQGYCQASSILHYAHG  
DNQQSHLLQAGRTALGTGISAGKRPNPEDDTQNVGPKVQRQSTN  
>Steatornis\_cari\_\_NWx51041.1  
RFL LQSLLEDLDNSLRKLNSRLFVVRGQPTDVF PRLFKEWGVTRLTFEYDSEPF GKERDAAIVKLAKEAGVEV  
IENSHTLYDLDR IELNGHKPPLTYKRFQAIISRME LPRKPVSPVTSQQMEACKVDIQENHDDVYGVPSLEEL  
GFPTDGLAPAVWQGGETEALARLDKHLERKAWVANFERPRMNANSL LASPTGLSPYLRFGLSCLRFYFYLWE  
LYKKVKRNSSPPLSLYGQLLWREFFYTAATNNPKFDRMEGNPICIQIPWDRNPEALAKWAEKGTGFPWIDAIM  
TQLRQEGWIHHLARHAVACFLTRGDLWISWESGVRVFD ELLLDADFSINAGSWMWLSCSAFFQQFFHCYCPVG  
FGRRTDPSGDYVKRYLPKLKGFPSRYIYEPWNAPESVQKAAKCIIGVDYKPMVNHAETSRLNIERMKQIYQQ

LSRYRGLCLLASVPSCVDDLGGPVADSASGGCSTSTAVRLSQADQASPKRKHEGAEEELCTEELYKRAKVTGL  
PAPEIPGKSI

>Stegastes\_part\_\_XP\_008276779.1

MAQTCIHWFRKGLRLHDNPALMAALRDCKELYPVFILDPHLHNNTCVGINRWRFLIGALKDLDCLSLRKLNSRL  
FVMRGRPEDVLPKLFQKWNVTCLTYEYDTEPYSLSRDKKVTELAKEHGVEVIYKISHTLYDIERIIEENNGKT  
PLTYNRLQAIIVKGLGSPKRPIAPAMENMKDVKTPCSEKHEEKYGI PALEELGHDTTSLGEDLFPGGGEQALR  
RLDEHMKRTGWVCNFEKPQTSFNSLSPSTTVLSPYVTFGCLSVRTFWWRLTDVYQGGKHSAPPVSLHGQLLWR  
EFFYTASVGIPNFNKMKGNHVCTQVDWDTNPEHLAAWREARTGFPFIDAIMTQLRQEGWIHHLARHAVACFLT  
RGDLWINWEEGQKVFEELLLDGDWALNAGNWQWLSASTFFHQFFRVYSPVAFGKKTDKNGDYIKKYLPLLKKF  
PAQYIYEPWKAPRSIQQAAGCIVGKDYPRPIVEHEVISKKNIQRMKMAYAKRSPDTTESPSKKQGVKRKAPSV  
VDMLKKKSKTN

>Stegastes\_part\_\_XP\_008283888.1

MLLCVWRSSSRLLKHLIQPNQRPSPVVFSTDSLSEATMSDKKRKATSAAAGKEPSAKQPKLAPAKEEKKKDA  
GWLQSLVQQQRSEKNDMKFNKKRLRFISGVEKIKQGGSEGVLYWMLRDNRVQDNWALIRAQRLAMKENLPLHVC  
YCLVVPESQLSTLRHYNFMLKGLEEVAKECKHLNIQFHLLHGAPGEVLPGFVSDRSFGAVVTFDSPLREPIQW  
LKDVKKGLSKEIPLIQVDAHNIIVPCWEASPKLEYAARTIRGKITKVLSDFLTDFPLVEKHPHTATRTAKPVDW  
DKTLASLSVDRTVGETEWAKPGTKAGMAMLESFIDVRLKLFDTQRNDPNAPALSQSLSPWIRFGHISAQRVALQ  
VQRSGRTAGVSVASFIEELVVRRELTDNFCFYNEKYDSVEGAYEWARKTLKDHAQDKRPYLYTKEQLEKAKTH  
DKLWNAAQYQMVSEGMHGFRLMYWAKKILEWTSSPVEALSIALYLNDRYELDGQDPNGFVGCMMWSICGIHDR  
GWGERPIFGKIRYMNKYGCLRKFNVAQFEKKYCPKNL

>Stegastes\_part\_\_XP\_008289212.1

MVVNTIHWFRKGLRLHDNPSLRDSIRGADTLRCIYILDPWFAGSSNVGINRWRFLLLHCLEELDASLRKINSRL  
FVIRGQPTDVFPRLFKEWQITHLSYEYDSEFPFGKERDAAIQKLASEAGVEVVVRISHTLYNLDKIIELNNGQP  
PLTYKRFQALINRMDAVELPAETITSNVVKNCMLPVSDDHDDRFGVPSLEELGFETEGLTAVWPGGETEALM  
RLERHLERKAWVANFERPRMNANSLASPTGLSPYLRFGCLSCRLFYFKLTDLYRKVKKNSTPPLSLYGQLLW  
REFFYTATSNPCFDKMEGNPMCQVQIPWDRNPEALAKWAEGRGTFPWIDAIMTQLRQEGWIHHLARHAVACFL  
TRGDLWIRWEEGMKVFEELLLDADWSVNAGSWMWLSCSSFFQQFFHCYCPVGFGRRTDPNGDYIRRYLPILRG  
FPAKYIYDPWNAPEEVQKAAKCIIGVHYPKPMVNHAEEASRVNIERMKQIYQQLSCYRGLGLLATVPANPNSSA  
NGSSVGGVNPGTNQGARGSSSEPSLQEGTSQTDRGQSIQKRREETPPESSSKVWKQSK

>Stegastes\_part\_\_XP\_008295949.1

MSTSRTVICLLRNDLRLHDNELFHWAQRNAEHVVPLYCFDPRHYVGTYNYNLPKTGPFRLRFLLESIRDLRNT  
LLNKGSNLVVRGKPEEVVADLIKQLGSGSVTFHEEVTSEELNVEKKVKEVCAKMKVKVHTCWGSTLYHRDD  
LPFFPHMARLPDVTYQFRKAVEAQSRVRPVFPTPEKLNPLPPGLEGAIPSAEDLQQTEPVSDPRSAFFPCSGGE  
SHALARLKHYFWDTDVATYKETRNGLIGVDYSTKFAPWLAMGCISPRYIYDQIKQYESKRTANQSTYWVIFE  
LLWRDYFRFVAVKYGNRLFQLKGLQDKSVPWKKDMKLFNAWKEGRTGVPFVDANMRELAMTGFMNSNRGRQNV  
SFLTDLGLDWRMGAWEFELLVDYDVCSNYGNWLYSAGIGNDPRENKFNMIKQGLDYDNGDYVRQWVPEL  
QAVRGADVHTPWTLSAALSHAHVSLGDTYPTPIVTAPEWSRHINKKPSGAGPSPRGRKGPSHTPKQHRDRGI  
DFYFSRSKNL

>Stegastes\_part\_\_XP\_008303150.1

MVVNSVHWFRKGLRLHDNPALQALNGADTVRCVYILDPWFAGAANVGINRWRFLLEALEDLDSLLKKLNSRL  
FVVRGQPTDVFPRLFKEWNVTRLTFEYDPEPYGKERDGAIIKMAQEFVGVETVVRNSHTLYNLDRIIEMNNNSP  
PLTFKRFQTIIVSRLELPRRPLPPITQQQMDKCRTKIADNHDLISIPSLLEELGFRTQGLAPAVWRGGESEALD  
RLNKHLDKKVKKNNRPVFPSSCLHQLRKRCSPPLSLFGQLLWREFFYTAATNNPNFDRMDGNPICVQIPWDQ  
NPEALAKWAEGRGTFPWIDAIMTQLRQEGWIHHLARHAVACFLTRGDLWISWESGMKVFEELLLDADWSVNAG  
SWMWLSCSAFFQQFFHCYCPVGFGRRTDPSGDYIRRYIPILKDYPNRYIYEPWNAPEALQKAANCVGVGDYPK  
PMINHAEGSRLNIERMKQVYQQLSHYRGLSLLASVPTIQEEAEPMTDESQTSSTSSGPDSPSRDLADSDAAGCST  
APDSSTAQAHPDPDEAAQPPCVSSHQLQPGQPASPSSSSCPTSSPSPSPASVAQRRKGIARKARRNQRRGRP  
SYPPIARGEEREEAGGEERMEEDVEQEERMEEEETAQQQ

>Stegastes\_part\_\_XP\_008304483.1

MPPPAADAQTVVRKMLRDVLAGREDPEGFFAMCVSVLGHQETRTOFPSLIQPLSTANRALHSILTSIYQEYFS  
KTEDDELELALALSLEMKDHQLSTPSQELQLLPEDRPNQSSSVQLNSVSKSQGSNYTQPADVPDVRKNTDS  
AQTGFWNRGSPQTTRETLELQKSTHLDKHKKQTPGPGQTVSFSKQDAVREGDQRMGTEDLIQSEKPKHKNRR  
QRRKGAGQQVLGLPCSPSAPPVLLWFRDLRLCDNPALMGSLVGVAPVIVFVWSPEEEEGPGVTAMGGAC  
KYWLHQUALSCFSSSLERIGSHLVFLKANGEGNEVGSSLLTLKELVKETGARTVLANALYEPWLKDRDDVVVSA  
LKKGVECRMFSYCLRDYVSVSTEGVGLRGIGSVSHFMSCKQNPASTLGVPLDPPVSLPTPSRWPQGAPLD  
TLGLARMPRRKDGTIIDWAANIRKSWDFSEEGAHARLDAFLHDGVRYEYESGRADAPNTSCLSPYLHFGQLS  
PRWLLWDAKGARCRPPKFQKRLAWRDLAYWQLTLFPDLPEWESLRPPYKALRWSSDRGHLKAWQRGKTGYPLVD  
AAMRQLWLWTGWMNNYMRHVVASFLIAYLHLPWQEGYRWFQDTLVDADVAIDAMMWQNGGMCGLDHWNVFMHPI  
DAAMTCDPYGSYVRKWCPELADLPDELIIHKPKCPASMLRRAGVAFGQTYPERIITDLEGRNQSLQDVALVR  
KEFGQYVDKRSgcdLVPLPPRLVSEALGLSHGAVRTEGKQFLLPVITRMEFKHQLEDPDADAAANPYNVAVLKG

YVSRKRDETI AFLNERDFTASVMYEGTQRKERLES DYRRMEGLPLLPSPRGRARRTP TAKDRFSVVPGGAVTS  
LR

>Stegodyphus\_dum\_XP\_035210488.1\_photolyase

MLKVLCLHALKPRRLRLLEYIKPKRGM SKQKKLTDYGNPAKKQKV EEEIDEAETTEFLNNISSERLSCASSIKDF  
KFNKKRVRVISEAKDIPKNAETIVYWMSRDQ RVQDNWALLYAQYLAFKVDLPVCICFCFLVPKFLDATIRHYRF  
MLKGLKEVSEECESLNIHFHLLFGEAKDVL PNFVKS NKVGTIVTDFSPLRVPRKWLLDISKKLP SDVPLLQVD  
AHNLVPCWIASDKQEYGARTIRKKI HDKLKEFLTGFPPVLKQKV TAKCMYEPTDWKNIEKHL DVDMNVGDVAW  
AQPGTKGGLLKLYEFVKIRLKYFNDSRNDPTKDSL SNLSPWFHFGQISIQRSILVVLKYKSKYPASVDAFVEE  
AVIRRELADNFCYYNSKYDEVEGAYDWA KKTLDKHSKDKREYLYSKEKLEDAKTHDPLWNA AQRQLLIVEGKM  
HGF LRMYWAKKILEWTQSPEEAEIAIYLNDKYS LDGRDPNGYV

>Stegodyphus\_dum\_XP\_035216340.1\_cry-1-like

MLVMCNLVHSEFMQWTKEACWIAIFYSFVDS DTNTVINCLFFILFYECNKDINLEMGESLKQTGTGIHLFRND  
LRLHDMPSLSTILEVCSTLYPVYIFEDDDIQTQ KIGYNRMRFILDALKDIDD KLHKVNGRLYVFQGGKIAILS  
DLFKRWNVTHLSYECDVQPVWVETENNIKQICAESNIEI IKKVSHTLWDTEAIVKANGGSPPV TYSIFNHVIG  
VLGLPEKPQSEVNFNEVIIPDDEKLDSKLLAKPEEFGINMECAEQINKIWI GG EIRALEHLEERLKIEKIAFS  
SGYFMPNQINPDLLGPPMSMSAALSNGCLSVRRFYWSLS DLYKSVNSDSCLPDGLLPDGLMGQLI WREYFYAM  
CMNNAHYSSMLDNPICLNIPWATNPSMLECWTGDKTGFPFID AAMRQLRQEGWIHHVARNAVACFLTRGDLWI  
SWEEGLKVFMYLIDGDAPVCAGNWMWVSSSAFENVLQCPSCISPILYGR RFEPSPGKYIRKYVPELKNMPHQF  
LFEPWLAPLSVQEVANCIIGKDYPFPIVNHQQASKRNADMMTAIKESFLPKSVPLHCAPSNSAETRVFMWLPE  
KCVENLLTCDN

>Stegodyphus\_dum\_XP\_035217620.1\_cry-1-like

MPVYKNLIQ GKLFVIRGNPMDVLP EAVKRWNIKLLTYEHDTEPYAKQRDEDIDK MMEKLNVI VTKGYTNTLYS  
PEQIIDYNGKVPLTYQSFLKSVEKIGLPAKPVPSFDM LKELKIAKGASTLIDSDYEEKYAVPTLEELRVNPEI  
LYPCLYPGGESEGMKRLEHVLQDEEWICKFEKPNTSPNSL SPSTTVLSPYVKFGCLSA RTFFYFKIREVYMKSK  
HGYSKPPVSLHGQLFWREFFYTVGSATPYFDQMIGNPICKQIPWKENKMLLEAWENAQTGYPFIDAIMTQLRQ  
EGWVHHLARHAVACFLTRGDLWVSWVHGMKVFEELLLDADWS LNAGNMMWLSCSAFFHQYFRVYSPIAFGKKT  
DKNGDYIRKYIPVLKRFPPEYIYEPWKAPKKLQEQLGCVIGKDYPARIVDHDEARVQNLRLMDAAYKGKSGNA  
SAEVKISAPDLKNSRTSKPESELPPVTQSSKRQSLERKSEGEHSKFSKKVKESLCNVRKRCKESDIKKYFIK  
KN

>Stegodyphus\_dum\_XP\_035227663.1\_cry-1-like

MAQENGITVISRTSHTLYELEKII EKNHGKSPLTYKQFQNILASMEPPPPQPKITVEDVGNCYTPLSE DHDE  
KYGVPTLEELGFD TENLKPPVWIGGETEALARLERHLERKAWVASFGRPKMTPQSL LPSQTGLSPYLRFGCLS  
ARLFYQELAELYRKIKKVNPPSLHGGI LWREFFYCAATNPNKFDH MVGNMCMVQIPWDVNPEALAKWTNGQT  
GFPWIDAIMTQLREEGWIIHHVARHAVACFLTRGDLWISWEEGMKV FDELLLDADWSVNAGSWMWLS CSSFFQ  
FFHLYCPVRFGKADPNGDYIRRYLPVLKNFPTKYIHEPWTAP EKVQLAAKCVIGKDYMPMPVNHQDVSHINL  
VRMKQVYQQLSYYRGANMCNTLTTHSSQQRDDDGYPKIVKRKA VDYPDDNASFQEV LHSSINVLQQNFTFEST  
DSQQQFFVL

>Stercorarius\_para\_\_NXG84728.1

LLKVDYDVC SNYGNWLYSAGIGNDPRDN RKFNMIKQGLDYDGN GDYVRLWLPELQGIKGADVHTPWALNGAAL  
SQAGVTLGKTYPQPVVTAPEWSRHINQRPRGSRPHPRGRGPAHTPTQHKDRGIDFYFSRKKDL

>Stercorarius\_para\_\_NXG85121.1

CIYILDPWFAASSAVGINRWRFL LQSLEDLDNSLRKLNSRLFVVRGQPTDVFPRLFKEWGVTRLTFEYDSEPF  
GKERDAAIVKLAK EAGVEVVIENSHTLYDLDR IELNGHKPPLTYKRFQAIISRME LPPKPVSTVMSQQMETC  
KVDIQENHDDVYGVPSLEELGFPTDGLAPAVWQGETEALARLDKH LERKAWVANYERPRMNANSLLASPTGL  
SPYLRFGCLSCRLFYYRLWEL YKKVKRNSTPPLSLYGQLLWREFFYTAATNPNKFD RMEGNPICIQIPWDRNP  
EALAKWAEKGTGFPWIDAIMTQLRQEGWIHHLARHAVACFLTRGDLWISWESGVRV FDELLLDADFSVNAGSW  
MWLSCSAFFQQFFHCYCPVGFGRRTDPSGDYVKRYLPKLKGFP SRYIYEPWNA PESVQKAACIIIGVDY PKPM  
VNHAETSRLNIERMKQIYQQLSRYRGLCLLASVPSCVEDLSGPV TDSASGQGCSTSTAMRLSQADQASPKRKH  
EGAEELCAEELYKRAKVTGLPAPEIPGKSL

>Stercorarius\_para\_\_NXG86034.1

MPHRTIHLFRKGLRLHDNPTLLAALESSEVLYPIYILDRKFMT SVMHIGTLRWHFLLQSLEDLQKNLRQLGSC  
LLVIQGEYESVLRDHVQKWNITQVTLD AEMEPPFYKEMEAKIRCLGEELGF EVLSLVGHSLYDTRKRI LDNGGT  
PPLTYKRFLHILSLLDGDEVPVRNLTAEDFQRCRPPDPGLAEGYRVPLPVDLKI PPESLSPWRGGETEGLQRL  
EQHLTDQGWVASFTKPRTPVNSLLPSTTGLSPYFSMGCLSVRTFFYRLSNIYAQA KHSLPPVSLQGQLLWRE  
FFYTVASATPNFTRMAGNPICLQISWYEDAERLHKWKTAQTGFPWIDAIMTQLRQEGWIHHLARHAVACFLTR  
GDLWISWEEGMKVFEELLLDADYSINAGNMMWLSASAFFHQYTRIFCPIRFGKRTDPEGQYIRKYLPI LKNFP  
SKYIYEPWTASEEEQKQAGCIIIGRDYFPMPVNHKEASDHNLQ LMRQVREEQPRTAQLTRDDTDDPMEMKAKRD  
HSEENISKGVARTAE

>Stercorarius\_para\_\_NXG93853.1



GETTGLARIEDYFWKSDCIAKYKETRNGLIGSEYSTKFAAWLAHGCVSPRQIHAEVKRYEKERTENQSTYWVI  
FELIWRDYFKFVALKFGDKMFYLSGLLGVHKPWNKNKQWFDWCKGQTGVPPVDANIREMAATGFMSNRGRQN  
VASFLTKDLVLDWRLGAEWFEQMLVDHDTVSNYGNWLYSAGVGNDRQDRKFNMIKQGLDYPDNGDYIRLWVP  
ELSGIKGGSIHMPWTLSSAQLNQAGVSLGETYPSPIVTAPEWSRHSKRPQSGRGGAGGSQGGGSQGGGRNQSG  
KGQRRNQGPGRGQQRGLDFYFSNPSQK

>Struthio\_came\_australis\_KFV86176.1

RFLQCLEDLNANLRKLNRLFVIRGQPADVFPRLFKEWNIAKLSIEYDSEPFGKERDAAIKKLASEAGVEVI  
VRISHTLYDLDKIIELNGGQPPLTYKRFQTLISRMEPLEMPVETITPEVMEKCTTPVSDDHDEKYGVPSLEEL  
GFDTDGLPSAVWPGGETEALTRLERHLERKAWVANFERPRMNANSLASPTGLSPYLRFGCLSCRLFYFKLTD  
LYKKVKKNSSPPLSLYGQLLWREFFYTAATNNPRFDMEGNPICVQIPWDKNPEALAKWAEGRTGFPWIDAIM  
TQLRQEGWIHHLARHAVACFLTRGDLWISWEEGMKVFEELLLDADWSVNAGSWMWLSCSSFFQQFFHCYCPVG  
FGRRTDPNGDYIRRYLPVLRGFPKYYIDPWNAPESVQKAAKCIIGVNYPKPMVNHAEASRLNIERMKQIYQQ  
LSRYRGLGLLATIPSNPNNGNGGLMGYSPOENISGCGSTGGAQLGTGDGHAVGVQTCALGDAHTGSGSIQQQ  
GYCQASSILHYAHGDNQQSHLLQTGRTSLSGTGISAGKRPNPEEETQSIGPKVQRQSTN

>Struthio\_came\_australis\_KFV86291.1

RFLQSQLEDLNANLRKLNRLFVVRGQPTDVFPRLFKEWGVTRLTFEYDSEPFGKERDAAIVKLAKEAGVEVV  
IENSHTLYDLDRIIELNGHKPPLTYKRFQAIISRMEPLPKPVSSIIISQOMETCKVDIQENHDDVYGVPSLEEL  
GFPTDGLAPAVWQGGETEALARLDKHLERKAWVANYERPRMNANSLASPTGLSPYLRFGCLSCRLFYRLWE  
LYKKVKRNSTPPLSLYGQLLWREFFYTAATNNPKFDRMEGNPICIQIPWDRNPEALAKWAEGKTGFPWIDAIM  
TQLRQEGWIHHLARHAVACFLTRGDLWISWESGVRVDFELLLDADFSVNAGSWMWLSCSAFFQQFFHCYCPVG  
FGRRTDPSGDYVKRYLPKLGKGFPSRYIYEPWNAPESVQKAAKCIIGVDYPKPMVNHAEASRLNIERMKQIYQQ  
LSRYRGLCLLASVPSVEDLSGQVADPALGQSSASTAMRLPQSEQASPKRKHEGAEELCTEELYKRAKVSGLP  
APEVPGKS

>Struthio\_came\_australis\_XP\_009665590.1

MPHRTIHLFRKGLRLHDNPTLLAALESSEVVYPVYILDRKFMTSVMNVGALRWHFLLQSLEDLQKNLLQLDSC  
LLIIQGEYESVLRDHVKKWNITQVTLDAEMEPFYKEMEANIRSLGEEELGFEVLSLIGHSLYDTRKILDLNGGT  
PPLTYKRFHLHLSLLGDPEVPVRNLTAEDFQRCRPPDLCLAEYRVPLPVDLKIIPPENLSPWKGGETEGLQRL  
EQHLMNQGWVASFTKPRITPNSLLPSTTGLSPYFSLGCLSVRTFFYRLSNIYAQSKHSLPPVSLQGQLLWRE  
FFYTVASATPNFTKMAGNPICLQINWYEDAERLHKWKTAQTGFPWIDAIMTQLRQEGWIHHLARHAAACFLTR  
GDLWISWEEGMKVFEEMLLDADYSINAGNMMWLSASAFFHQYTRIFCPVRFGKRTDPEGQYIRKYLPIKLNFP  
SKYIYEPWIASEEEQKQAGCIIGQDYPPFMVNHKEASDHNQLMKQVREEQYRTAQLTRDDADDPMEMKIKRD  
HSEENVKKGKMARTAEQTXILSGITFWELKNSKWGEPEASSGNSCIVSS

>Struthio\_came\_australis\_XP\_009680395.1

LQDKEVPWKDLQLDFDCWKEGKTGVPPVDANMRELAATGFMSNRGRQNVASFLTKDLGLDWRMGAEWFEYLLV  
DYDVCNNGWLYSAGIGNDRDNRKFNMIKQGLDYDNGDYVRLWVPELQGIKGGDIHAPWVLSSTSLSQAG  
ITLGETYPLPVVTAPEWSRHISQKPQGRGHHPKGRKGAHTPTQHKDRGIDFYFSRKDI

>Struthio\_came\_australis\_XP\_009680452.1

MPQKKEKRKAGQGGKTEAEPDTTELPRFPKRNKEEAALGKLEEAVQEARQKAAPSVQDFKYNKKRVRLISQG  
SDLKDGAKCILYWMSRDQRVQDNWAFLYAQLRALKQELPLHVCFLVPKFLDATIRHYGFMLRGLQEVAKVDA  
HNIVPCWVTSPKQEYSARTIRGKIHSQLEFLTEFPFVIPHYPSSLAEPVAWEACYSSLOQVDRTVKEVEWA  
TPGTAAGLAVLQSFIAERLESFSGHRNDPNKAALSNSPWFHFGQVSTQRAILEVRKHHRYKESVDIFVEEA  
VVRRELADNFCYNNKYDSVQAGYDWAQTTLKLHAKDKRPFLYELQELEQGNTHDPLWNAQLQMVREGKMHG  
FLRMWAKKILEWTRSPEEALQFAIYLNDRYELDGRDPNGYVGCLWSICGIHDQGWAERAVFGKIRYMNYAGC  
KRKFDVSQFERRYAPHKLK

>Stylonychia\_lem\_CDW77913.1\_cry\_5

METISKFTIYWFRKCQRIHDNKGLDSSIQKNLLPIFILDWPFIKSDKTGTNRIFLLESLSDLNANLKTYN  
SNLIILYGNPSDIFEKLAKHSENLYFELDTPEYALDRDRKVQKICEKEGVQVHRNAGHTLLKLADLAQAGESC  
KNMGDFLQFIKESMIDKPLEKPDDLPSLPADYEKILKSLKIEYSNQVPSLSEIDRNEEATASLKGGETEALN  
IMNDYLKDKKKVNNFSPFTSPNSLKPSTTTLSPYLKFGCLSPRLFYHNLKKVMDRNATQPPVSLVGQLFWRE  
FFYSKSYTVKNFDMVGNPICKQMNWERNEEIRKWEMGQTGFPAIDAVMNQLRQEGWMHHLGRHLVACFLTR  
GHLYQHWEAGRDVFDKYLLDADYALNNANMMWLSCSSFFSQYWKVYSPISFFQKTDKNGDFIRKYVPQLKHYP  
AEFIYEPHKAPIMVQKRCKCIIGEDYPLPIIDYKKEGAINMQRMKQVFADSKDQSIKEEKKSISVTPKKGKVV  
KEESKSNKTIKDFMSDKNQVKKAAEEWALGEDQNIQNDKKAHNSQNLSKSRKSLKQ

>Stylonychia\_lem\_CDW81657.1\_cry\_dash

MEKRSNKRKLDQISNQEEKGTVPVKQENSCKVKKNPEESQQTPKTEEPSNNKMQRRIILWFRNDLRLHDNAIL  
NYAVTKVAKNKQIIPVFCFDPFRFYGRKVQKYDTLKTGLVRQRFMIETVQNFRERLEKVGSKLLVSMDKPEIFL  
PTLIDKSCDNTIVYQDEICSEELTVEKLVKECKKAEIKSFWGSSCYHLDDLGFHPNDLPHIYGKFKREKTEGV  
KVRPLFGQPKQDQLPFIEKPSKDILEAAEFMPTLKDGFSGKEEVEKPRDKRACYEFIGGEEQATKRLTEYIFE  
TKSVGNALVRNNLIGANYSSKLSPLWACGALSPLYIYFQVKEFEKKHRTNESTKVFLDELFWRDYRFWCMK  
YGSKVFSSYGIYNREYYDWTDTKETVKKWKEGNTGMPIIDALMREMNVTGFMPNRMIVACYLTMDLKQDWR

EGAYHFEEKLIDHDVQSNYGGWNFSAGIGPGRVLVFNFSVKQSKDHDKNGDYIKMWVPELKKVPVEYIHEPWMTM  
PKDLQKGCKTVIGEDYPYPINCSKYTNKVAHTIEKQAKKSKRAEEKLKQTKLTK  
>Stylophora\_pis\_XP\_022786103.1\_cry\_DASH-1  
MEGCKTVVIYLLRNDLRVHDNECLHWAHQNSDFVIPLFCFSDKSILSPGAITWHYKFAKTATHRAKFILESVSD  
LRESLRKLGSDLVVRSGQTAKEAVSDIINLCQAKNEGHVSLVYQREITKEETDVEEELLKLCEAEKVTVKSF  
GLTLYHLEDLPFASVKFLPDYTDYDFRKNVEAKCRVRPLIPTDCLKSLPAFLKDDQVGRMPTLQELAMDHSEE  
TADQRSAPFSGGETAALARLNQYLWDTDLVARYKETRNLIGSDYSTKFSPLAVGALSPGKVFDCIKKYET  
ECTANQSTYWVIFELLWRDYFKFVSLKYGVSI FYLSGIMRKTGLPWKCDMVAFDKWRYGQTGVPFVDANMREL  
LYTGWMSNRGRQNVASFLVKDLGLDWRMGAEWFESELLLDHDVSSNYGNWNYSAGIGNDPRENKRKNMVKQALD  
YDPDGDFVRLWVPELAGLKGAHVHTPWLLSSSELKHAGITLGGNYPKPMVCPPEWSRHTSKVKDSRKTTLRAQP  
RGIDFYFKSPKGAGSSRKRH  
>Stylophora\_pis\_XP\_022794023.1\_uncharacte  
MTSNMNSLHWFRKGLRLHDNP SLRQAVEGSSSTFRAVFFLDVDSLDEINLSKNKWLFLECLLDL DKS LRRLNS  
RLFIVRGQPIDVFPKLIRQWNI TRVTYEYDSEPFPRRRDDSIKRLLESEGVEVLTSVSHTLYDIDEVIKSNHG  
NVPVTFKQFECLVSKLNSPNCALVVDEQLFKNCKTPVEDDDDETYGVPEYDALDFGEEAEPRQFVGGETEA  
LKRLAVLEKEVAEPTLGKPHHESNSPFPKSSKLSPYLRFGLSVRHLFHRMNQVYREANGRSAPMSVHLP LLW  
REFYFV VASKHPNFDKMKNNSLCLQFPWEEQTCKLEKFRQGTGFPWIDAMMRHMLSEGWI PHLARQAVGCFL  
TRGALWICWEEGFKIFEKYMLDAEWSINAGSWMWLSCSAFFAKHPQWTCPVGLGKHLDPQGNVVRKYVPELKD  
FPSEYIYEPWDAPLELQEACNCVIGTDYPQPIVNHQQARKNCVDRLRGVYQNLVTKVSCNVGLGHNAMHWFRK  
DLRLHDNP SLCEALTNCRTFHAVYILDVPSARA AKVSANRWKFLVDCLRDLDKSLRECGSRLHVIRGQPTYVL  
PKLFQDWNISKLTFECEIEPFGQRRDVAVAVLGEEHGVEVISKPSHTLYDPEKI IESNEGEAPMLIKTFENVI  
RQMGPPPEKPVDAVNKEMFKGCICPVSNHDSTRFGIPSLDELGYRGCEVTTGDLWVGGEQEAIKRLTELEEKVL  
EGSLKKSVEGLDALRPSRTQLSPYLRFGLSPRLFHLRLTKAYMKVKCQPPPLSLYRQLVWREFFFTLASRNP  
QMDRAVDNPLSFNIPWEENQDALDAWKEGHTGFPWIDAIMRQLHAEGWIIHHVARQAVGCFLTRGCLWISWEEG  
FKLFEQLQLDSEWSLNAGNWLWVSCSAFFHGQIPWYCPVNVGKKLDPSGNFIRRYVPELKTMP TKYIHEPWMA  
PLAVQKASNCIVGDYDPDRLCDHIERRKICLERLKDVCQQIQGTNSSSQDTADVVD  
>Stylophora\_pis\_XP\_022795820.1\_photolyase  
MVLFGCAGLIWKTARLVSMANEPPTKRAKKEIAETNHQNN TGQNTLAKYLEKRKNVCESVAEFKFNKKRVRLI  
SSTTDMPECKGIAYWMWREQRVQDNWAMLYAORMALKQQVPLIVIFCLPSKYLDAAFRQYNFMIKGLQEVEK  
ELTELNIAFHVLLGEPDKVLPDFVKSKEIGGVVADFTPLRRPLKWLEDIAKKLPKNVPLCQVDGHNIVPCWQA  
SPKLEYGARTIRPKIHNLKQFLTEFPPIKHPHAGDYE VKVDWEAVDNFIEVDRAVKDVDWAKAGTKAGLD  
MLESFCD SRLKYFATDRNNPTKEALSNSLPWFHAGHISVQRAILRVREFRSKAKDSVEAFIEEAVVRRELADN  
FCFYNL ENYDSIKGTNAWAQKTLLDHAQDKREYLYTREELEDGNTHDDLWNAALQLVSEGKMHGFLRMYWAK  
KILEWTATPEEALEVSLYLNDRFSLDGNDPNGYVGC MWSVCGVHDQGWAERP VFGKIRYMNYNGCKRKF DVAE  
FVRKNGRKKQD TTGGTDKSLKNRKRKAAGCYNM FVGENPK  
>Stylophora\_pis\_XP\_022798906.1\_cry-1-like  
MSNATVQRKDEHVGSVEGRSSAKNEKEKHAH HWVRKDLRLHDNP SLLEAVKGS DTLRIIYVLDTKVDQ NIGIG  
ANLWRFLQCLEDDVDSLRLQNSRLFVVRGQPADVF PRLFREWNTSLLTFEEDSEPF GREKDAAIRLLAKESG  
VQVAVRRSHTLYDPQLIIKNNGGTPPLTYKKFLAIISSLGPPEHPVPTLDVHLLGSCSTPI SDDHEEKYGVPS  
LEELGMDIRKVHAAVWHGGEKEALVRLNRHLERKAWIASFEKPKVTPNSLFPSPGTGVS PYLRFGLSPRLFYH  
RLTELYRKVKSSDPPI SLYGQLLWREFFFTVAANNPHFDRMATNPMCLQIPWKNNPENLARWEEGRTGFPWID  
AIMIQ LQQEGWIIHHLARHAVGCFLTRGNLWISWEEGMKVFERWLLDAEWSLNAGNWMWLSCSAFFQQFFNCIC  
PVGFGRKLD PNGDFVRKYL PVLKGFP AKYI HAPWTAPESVQKAARCIIGIDYPHPMVDHTKVS CANLEKL RNI  
FKALLCYKDSSAISLEKQDNLRGQQEKLKQMFLEDKENE  
>Stylophora\_pis\_XP\_022808227.1\_cry-1-like  
MASKQRRVHHTIHWFRKGLRLHDNLSLKEACETSLTLRPVYFIDPDYVKHGNMGFNRRWRFLIQSLSELDKNLK  
SIGSRLFVIQKPELELPKLFKAWKITKLTFEFDHEPEGRQRDAKIH ELATKAGIQVETRICHSLYDLDKIIS  
KNGGTAPLTYKKLCSVVASLGPPLKPIPTVDKITFDGCSTPVGKENKYQLPTLEELEIETPEESSTVIFLGGE  
TEALRRLDEHMQKEDWVNKFEPNTSPNSLQPSSTTVLSPYVMFGCL SARLFYHRLSDVYSRAKKHSNPPVSLH  
GQLLWREFFFTAAYATPNFNKMEGNPVCLQIPWEKNQEF LQAWCEAHTGYPFIDA IMTQLRREGWIIHHLARHA  
VACFLTRGDLWISWEEGLKVFDKLLLDHDWLSNAGNWMWLSASAFFHAYYRVYSPIAFGKKTDP SGDIYKKYL  
PILKKYPPKYIYEPWTAPLSVQKTAGCVIGKDYPRPIVDHKEAVKINLARMKKARTEGDSNNGMEEDSLEKKK  
SSPAKRKNSKEAQSSKKPRKITEFFKTL  
>Suberites\_dom\_CA266367.1\_cry  
MHCNYPLATQTTFQGSIPDTTVHWFRLDALRLHDNPAFVDAVKTDGNFKAVFIIDPWFNANYNNGGPQVNVW  
RFLLEALHDLDSRLQKKPYCARLNVLYGQPTMILPELYKKWNVKKITFQASQVSSESMKHDGI IKILSEQQNV  
QAVSYFSHTLYDPANVIALNNGRVPLSYKEFRRLMPLMGKPASPIPEPHMSLCMKAPPSELVPEPEGKIPKL  
QDLGLSDEFALYTN SWVGGETEALSRLSSFC SRRAAI PNEPVHWLMSKDTLSPIYKFGCLSVRQLFSQLLQFA  
STSSKGQELFELLTKNLLLREFAFLVGSSSPKFDVMEGNSLCIQLPWESNNVFIQAFRNGQTGYPWIDAIIRQ  
IRQDGWAHFLARQSI AVFLTRGYLWISWVLGKEFFQEFMIDFELPVSSVCWMQSSCSGFFCTQIESYDPCLVG

KQIDTDGHYIKTYVPELKDFPSEYVHQPWKCSSLHTEASWLCDREQYPKPIIDVCKQGELCCKRVQSIMKALADVYGVE

>Sula\_dact\_\_NWI27891.1

DNWAFLYAQRLLALKQELPLHVCFLVPKFLDATIRHYSFMLRGLQEVAKECAELNIPFHLLLGyakDVLPTFV  
VEHGVGGLVTDfCPLRLPRQWVEDVREQLPEDVPFAQVDAHNIVPCWVASPKQEYSARTIRGKIHAQLPEFLT  
EFPPVVRHPYPPSPCAEPIAWEACYSSLQVDRTVKEVEWATPGTAAGLAVLQSFIAERLKSFSSSHNDPNKAA  
LSNLSPWFHFGQVSTQRTILEVQKHRAKHESVDAFVEEAVVRRELAENFCYYNENYDSVQGAYNWAQTTLKL  
HAKDKRPFLYKLQELEQGTTHDPLWNAQLQMVREGKMHGFLRMYWAKKILEWTRSPEEALQFAIYLNDRYEL  
DGTDPNGYVGKLQDGGMGRGGCLWSICGIHDQGWAERAIFGKIRYMNYAGCKRKFDVQGQFERRYAP

>Sula\_dact\_\_NWI29137.1

MQHSSIHWFRKGLRLHDNPALLAAAANCHRLYPLFILDPSDDRGGANAQRFLLDLSLQDLGSLREMGTRLFVV  
RGCPEEVFPHLFHTWGTTRLTFEVDTEPTAWQRDATVVELAARHGVEVIREVSHTLYDTRILALNNGKAPLT  
YKHLQSLLASLGPPAKPAPALTRKHLRGCHTPCQVSCDADYGVPTLEELGQDPTTAGSNLYPGGETAALARLD  
AVMERTAWVCGFKKPEPETENSLSPSTTVLSPYLKFGCLSVRTFWWRLEIYQGREHSQPPVSLHGQLLWREFF  
YTAGASIPNFDPMVGNPVCLQVDWDDNPQHLHAWREGQTYPFIDAIMTQLRTEGWIHHLARHAVACFLTRGD  
LWVSWEEGLKVFEELLLDADWSLNAGNWLWLSGSAFFHRYFHVYSPIAFGKKTDRDGAYIRKYLPLVKDFPAE  
YIYEPWKAPRAVQERAGCLVGTHYPQPIVEHQVVSKRNLGRMKAAR

>Sula\_dact\_\_NWI32173.1

KVDYDVCsNYGNWLYSAGIGNDPRDNRKFNMIKQGLDYDNGGDYVRLWLPELQGIKGADIHTPWALNSAALSQ  
AGVTLGETYPQPVVTAPEWSRHVTQRPQGRSPHPRRGPARTPVQRKGRGIDFYFSRKDV

>Sula\_dact\_\_NWI32941.1

WFTSENNsFSTNPCRFLQLQCLELDANLRKLNSRLFVIRGQPADVFPRLFKEWNIAKLSIEYDSEPFGERDA  
AIKKLASEAGVEVIVRISHTLYDLDKIIELNGGQPLTYKRFQTLISRMEPLEMPVETITPEVMEKCTTPVSD  
DHDEKYGVPSLEELGFDTDGLPSAVWPGGETEALTRLERHLERKAWVANFERPRMNANSLLASPTGLSPYLRF  
GCLSCRLFYFKLTDLYKKVKKNSSPPLSLYGQLLWREFFYTAATNNPRFDKMEGNPICVQIPWDKNPEALAKW  
AEGRTGFPWIDAIMTQLRQEGWIHHLARHAVACFLTRGDLWISWEEGMKVFEELLLDADWSVNAGSWMWLSCS  
SFFQQFFHCYCPVGFGRRTPNGDYIRRYLPVLRGFPKAYIYDPWNAPEISIQKAAKCIIGVNYPKPMVNHAEA  
SRLNIERMKQIYQQLSRYRGLGLLATVPSNPNGNGGMLMGYSPGESISGCGSTGGAQLGTGDGHTVVQPCAL  
GDSHTGASGIQQGYCQASSILHYAHGDNQQSOLLQAGRTALDTGISAGKRPNPEEETQSVGPKVQRQSTN

>Sula\_dact\_\_NWI33849.1

MPHRTIHLFRKGLRLHDNPtLLAALESSEVVYPVYILDRKFVTSVMQIGALRWHFLLQSLEDLQKNLCQLGSC  
LLVIQGEYESVLRDHIQKWNITQVTLDAEMEPFYKEMEANIRRLGEELGFVLSLVGHSlyDTRILDNNGGT  
PPLTYKRFHLHLSLLGDPEVPVRHLTAEDFQRCRPPDPGLAECYRVPLPVDLKI PVESPSWRGGETEGLQRL  
EQHLTDQGWVASFTKPRITPNSLLPSTTGLSPYFSMGCLSVRTFFYRLSNIYAQAKHHSLLPPVSLQGQLLWRE  
FFYTVASATPNFTKMAGNPICLQINWYEDAERLHKWKAQTGFPPWIDAIMTQLRQEGWIHHLARHAVACFLTR  
GDLWISWEEGMKVFEELLLDADYSINAGNWMWLSASAFFHQYTRIFCPVLF GKRTDPEGQYIRKYLPI LKNFP  
SKYIYEPWTASEEEQKQAGCIIIGQDYPPFMVNHKEASDHNQLMKQVREEQYRTAQLTRDDTDDPMEMKVKRG  
HSEESVTKGKVARMT

>Sula\_dact\_\_NWI34460.1

RFLQLQSLLEDLDNSLRKLNSRLFVVRGQPTDVFPRLFKEWGVTRLTfEYDSEPFGERDAAIVKLAKEAGVDVV  
IENSHTLYDLDRIIELNGHKPPLTYKRFQAIISRMELPKKPVSTVMSQQMETCKVDIQENHDDVYGVPSLEEL  
GFPTDGLAPAVWQGETEALARLDKHLERKAWVANFERPRMNANSLLASPTGLSPYLRFGLSCRLFYRYRLWE  
LYKKVKRNSTPPLSLYGQLLWREFFYTAATNNPKFDRMEGNPICIQIPWDRNPEALAKWAEGKTGFPWIDAIM  
TQLRQEGWIHHLARHAVACFLTRGDLWISWESGVRVFDLLEDADFSVNAGSWMWLSCSAFFQQFFHCYCPVG  
FGRRTDPGSDYVKRYLPKLKGFPSRYIYEPWNAPESVQKAAKCIIGVDYPKPMVNHAEISRLNIERMKQIYQQL  
LSRYRGLCLLASVPSCVEDLSGPVTDASAGQGCSTSTAMRLSQADQASPKRKHEGAEELCAEELCKRAKVTCL  
PAPEIPGKS

>Suricata\_suri\_\_XP\_029811092.1

MGVNAVHWFRKGLRLHDNPALKECIQGADTIRCVYILDPWFAGSSNVGINRWRFLQLQCLELDANLRKLNSRL  
FVIRGQPADVFPRLFKEWNI TKLSIEYDSEPFGERDAAIKKLATEAGVEVIVRISHTLYDLDKIIELNGGQPL  
TYKRFQTLISKMEPLEIPVETITSEVIEKCTTPLSDDHDEKYGVPSLEELGFDTDGLPSAVWPGGETEALT  
RLERHLERKAWVANFERPRMNANSLLASPTGLSPYLRFGLSCRLFYFKLTDLYKKVKKNSSPPLSLYGQLLW  
REFFYTAATNNPRFDKMEGNPICVQIPWDKNPEALAKWAEGRTGFPWIDAIMTQLRQEGWIHHLARHAVACFL  
TRGDLWISWEEGMKVFEELLLDADWSINAGSWMWLSCSSFFQQFFHCYCPVGFGRRTPNGDYIRRYLPVLRG  
FPAKYIYDPWNAPEGIQKVAKCLIGVNYPKPMVNHAEASRLNIERMKQIYQQLSRYRGLGLLASVPSNPNGNG  
GLMGYSPGENIPGCSSSGSCSQSGSILHYAHGDSQQTHLLKQGRSSMGPLSSGKRPSQDEDTQSIGPKVQRQ  
STN

>Suricata\_suri\_\_XP\_029812989.1

MAATVVTAATAPAPAAGADGASSVHWFRKGLRLHDNPALLAAVRGARCVRVYILDPWFaASSSVGINRWRFL  
LLQSLLEDLDTSLRKLNSRLFVVRGQPADVFPRLFKEWGVTRLTfEYDSEPFGERDAAIMKMAKEAGVEVVTE

NSHTLYDLDRIIELNGQKPPLTYKRFQAIISRME LPKKPVGSV TGGQMESCRADIQENHDEAYGVPSLEELGF  
PTEGLGPAVWQGGETEALARLDKHLERKAWVANYERPRMNANSL LASPTGLSPYLRFGCLSCRLFYRLWDLY  
KKVKRNSTPPLSLFGQLLWREFFYTAATNNPRFDRMEGNPICIQIPWDRNPEALAKWAEKGTGFPWIDAIMTQ  
LRQEGWIHHLARHAVACFLTRGDLWVSWESGVRVFDELLLDADFSVNAGSWMWLSCSAFFQQFFHCYCPVGFG  
RRTDPSGDYIRRYLPILKGFPSRYIYEPWNAPE SIQKAAKCIIGVDYPRPIVNHAE TSRLNIERMKQIYQQLS  
RYRGLCLLASVPSCVEDLSNPVAEPSSSQTGSTSSAGPRPLAIGPASPKRKLEAAEEPPGEELSKRARVA AVP  
SPELPSRGV

>Symbiodinium\_mic\_CAE7395975.1\_UVR3

MAAGVWFRKCLRLHDNEPLVKAVASGLDVVPFFILDPHF DKS RVGVNRFSFLLQSLKDL DGQLRRRGSRLLVF  
RGQPEQVLVELFGEKAPVHLSAIFWEADTEPYARAR DERVLAMAKEGGVHA EKLSGHTLLDIDATVAKPGFKP  
PISMKSIQTIVNAVGPFRQPFDPVKIPPLRIEGHNVPDI SELYDEEPSSHGFPGGETEALARLQRTCSDVQYV  
CCFEKPKTASTGRPGCPWEPSTTGLSPYLKFGCLSVRTAWYAI DRCIRGKSHSQPPQSLHGQLLFREMFYLLG  
AAVPNFDRNEGNSMCKTIPWGCDESLLAWEAGKTGYPFIDALMRQLKQTGFMHHLGRHAVACFLTRGDLWQN  
WTAGRDRVFDRLLLDADWAVNNGNWLWLAGVAPFSAPYFRIYDPCPGPKSSLNADQTGEFVKHYVPELRNMPAK  
YLYKPWTAPVAEQKKAGCIIIGEDYPKPIVDHQ RAREENLAKFKAALDAKG GELPAKFGGAKGDPGPMRSSYTS  
GKGATGKGGKRADTPQTEDGDSRKVRRWGKLGDTVAGG

>Symbiodinium\_mic\_CAE7547081.1

MSANVASSVPVVEGV D VRRCRRLNSVQLKESTDPVIYWMSRDQRSVDNWALIYAQKLAI RQSAPLHVVFSLVP  
KFLDATLRQYDFLLKGLREVAVDLESKNMPATFPFHLQLGKAGDKVPALVNELSAQM VVCDMSPLRVPSQWAR  
DVADACQAKEVPVQVDAHNVPVVAASDKQETAARTIRKKLMQSLGTYLTDFPRVEKHHPKSKGNFQPV DWV  
QAEQSLQVDDSVRPVAAIVPGTAAGLAALED FCKRLSRYDAHRNDPNENALSGLSPWLHFGQIS AQRCALVR  
LIGEIKTATSSEKKSCEAFIEESVVRRELSDNFCFYNVNYSLEGAAGWAQQTLKDHSKDKREHLYCKEDLEN  
AKTHDDLWNAQ LQMVREGKMHGFLRMYWAKKILEWSPSPKEALERC IWLNDRYELDGRDPNGYVGC MWSICG  
VHDMGWKEREAEQWFSVNGDVAMMLARHALLNAFEEITAGEKEHILGCGTIRVRTYEDFMQNAIGGVVTRAAK  
DLATWAI E VSPHATWHGCQAVELGAGCCLVSSVLMKLGAAVIATDLP ELLPHMEYNLQLNDEGG SLLGRWAVD  
SLNWDSTEARVKLRGLGNGADAI FATNCVYGRD TVDMFLSTMFALS GPCTLALMCGVPVPPAALAP EEVSI  
LDEFLAACPRFFDCYLLKVPGGIEDAGVARVQDSPLAAELGKPYGLSAAALADGVWLFKLP GSDCPSWARPVL  
CIGYGTTLQANLRQWQGM CWHSHIQLLR LQRKLISGLHPQ

>Symbiodinium\_mic\_OLP81567.1

MEGQGVANRFEGRCDLVLLGWTAFIVLNLASDYFWTRGSSEAEDVPTVGS MGMTADIYMGSYTLETS AAPFG  
AVHSHGSWRHA AVSWHSGVFVGFRI GNSRDPNTGELNASFTISAQLPRYSIEVPPSGGDTCFADAATAFERLE  
SLEAVCSQAHH DALHNARKPGTYATMEEEQRRQTPLMAVPLVMTHPVTGRKHQDDL AGANSSVFHVQRRGADG  
PSASLLERAEGAEAYEDPSVDEL RKWLP HATGPEFVVRWRWQPGDLVIW DNRSTMHCATGGLLET LQADRKSS  
SHVQPSNGSLLEEGMLRMGFGSQPSPLMSVHANSISLSLMPKDLQRGFGPLQS QLLFAGLELG GAGRILLCGD  
VRGDLPKVKCKVDGLQRKLPEEQRFRAVFCVGEFSAEEMNL DVEEKPSVPIYFIDCGPACQDLIDES PQGDEV  
APNVHFLGHYGVTSVAGLKVLSRAAQLSREQKL PVL P VYLFDP RQFRET KFGTLKTGAFRALFLLQSVRV LKR  
RLRSLGSDLLVKVGKPEDVLP SLDDKKS VLV TQEEVTSEERSVDKALRRELAAKGCEAWEYCWGSTLFHRDDL  
PFRQDLSNAPDVFTSFKNQVEPEMAARVNEVPSSFQDKRKDKSHMGVRPCLPDLPPGALPLPEARAGLDFALV  
FEPEWEDLPFEKPV EEPVPEAAA HQFEGGEVAALGRLQYYLFETDLVAKYFETRNGMLGSDYSTKFAPWLAL  
GCLSPRKIFEQIREYEKEKVANKSTYWVLFELMWRDFFRFFAAKHGNKIFKLYGVSGGDWEWQSDAKLFQLWA  
RGLTGYP LVDANMREL RATGFMSNRGRQNVASF LALDMKIDWRMGADWFESYLVDYDVASNWGNWVHAAGMTT  
GRINRFNVIRQSKMYDKDGRYIRHWVPELR SMPVRYIHEPWTLS PDEKLQFGAESYPAPCLDPASFREEGGGK  
GKGRKRSKGGRRKIGMLHRWCTTLPVAYLSGRLKAELFEEQDDNYDEDGGQALPQADDLKS KYAAQEGDRGLF  
AGAPPALETEPTSSTASRSSSGPSWHEELKAKEKKKEFMQTQLFLDGRYTPLAVERLCEEIGDSGGVDILLTSE  
WPKGILGGLKDAWPEEAEARRLAKSAVRQCCSPAVAE LAVA AE PKYHAVGLGGVFWRRAPWRHERRGEVEAST  
GTLKCGVCRMIALGAVDGS R PGVNEAIDAQRKYSYKKPEELEAQAKPQKWLHGLDLPKSMPTDADDATPSPW  
AEKAVKVEASSNP

>Symbiodinium\_mic\_OLP98304.1

MCRVTKLKEERISEEDTLKAAEVQRGKEWHEHYVEEHTEDTQVVEQISQAQQALKTGSSAALLQKAPMLRAAE  
RRLAASEKQRLVSFLSGERMDPSYVLGILSGMADDTKEEIATDDKNEDTAIHTYDELED SKKVEISTLLEQFE  
RKMKRIGELKVEEVNMKKSMEGAGQSLADDKMKLQSTCEAKAAAEERQATRQKELSALQETVKILDSDE  
SLDLFRGKASSLLQLSKGDQDKDKALELV LKARSEAHPELNFLALALSGRKIDFSKIVKKIDGMVELLKTEG  
KDDASKKDYCGKEFHAEELKTSVASTITSLTATVEQSKGAIAQLATEIKGLQAGVELDKTVAEAGENRKAE  
HEDFQELLASNGQAVQLLDLAKNKL NQFYSPSQFVDTTTKNPFDPYAF LQSSSRKVEAPPATFEGGYQAKMSE  
SHGIFSLIAQLKADIEQEMALAKSDEANSQKDYEKTLADA AEKRDADVTLTQEKAKTKADLETDLSDDKSELS  
NKKKEATVVEEVSNLHKECDWLL EHF DLRAQARA EKENLVQAKTVLSSMCSTGFPLVDAAMRQLWAVGWMP  
NYLRHVVAQMLIEYLDLTWKHGLEWFDWTLVDIDVAIN SFMWQNGGHS GPDHWEFVLHPVNAAKSCDPEGHYV  
RRWL PFLAGCPT EYIHR SIPSLDWRALLHEVL AGMQSGSFNLRSSWSNPVQLSGGSRAQALLES PPSR PAT  
TVPADFQTPQEKASPSALGYTPERCPSILRQAFREMYSEARTSPAQEDPYGSAPP IEC LLLGKHWA VAADIA  
RGLGEPGVVILGLVHILVYNSYIKVGRSDDMTPQLLRRLTKYRQHSMAD EARLAFPSIYVATSGEQASLLEGF

RYMHMSANHPNFRLLDPTDTISEVGREKYDRRALHILVAFMEFGSTRITVDQISAGRTVLRPWEMPLRVARPLG  
LPKLEPLVRDLDAARRAHCRQVLEVRRKHPPEMVSRTGHEWLRLLGGGLLAKLVTRQEFRAETEDFIIFYQGPRQK  
GSKGSGKAGLDAGRSVLAEEVQKHESDTFGPGL

>Synchytrium\_mic\_XP\_031023209.1\_uncharacte

MSTSSKRAAPVQDSEESQPQKKLKGPVIADGKSILMWFRDRLTLTDLNTALFAASQSALKLSLPLVALFIVSPQ  
EWNHNLVAPIKVDFCFRALQSLSTTLSSGLIPLLIKEVPTKTDVIQMVKQCTCTDFKASELWYNIEYEVNESRR  
DAKVQTELATMGINVLPCHDQCVVRPGLVKTKEGKDYTVFTPFKNSWIAYVESKKMLLKLKPAPSVMPSLSED  
ISALVADHLKVPSFHPDFRLDDAKAARAKEAFPASEAHAQSRLTNFVNTKITKYGDDRDKTFMDGTSALSPYL  
ASGLISARQCLEKAMAANGNKLAGQKGPSTWISEIIWREFYRQVLVAFPRVCMNKSFKPEGHKIVWKDDEEAF  
RAWCQGRGTGFPIVDAGMRQLNETGWMHNRARMIVASFLAKDLLINWKRGENYFHEHLIDADLASNNGGWQWAA  
STGTDSPQYFRIFNPLQSEKFDPDGKFIRKYVPELASLKGKAIHDPTSALGVKGVEKLGYPKPIVDHKAARD  
AALAAAYALAFKKTAV

>Synchytrium\_mic\_XP\_031023438.1

MAKSVTTAIFWFRNDLRLHDNVPLVASLTDQTSTHLLPIYIFDPRYIDLTRIIPSFTSPKTRHYSIPRTSYHR  
LKFLIESIDDLKSSLLKHNSSLIIRYGRPEDVIPALVRGLQGDGVKVSQVGYCMKEVCSEERDIERRVAERVS  
PLVSRHGGSMVAMEDLPFGVQDLSDVYTVFRKRVESLPQMVPRCIPPLPHFKPLPPASPPLTSSPHPSKNLTST  
LLPVIHPTPPPPVPPHTSHPFVGGETSALSRLNNYLFETHAVSTYKQTRNGLMGDAYSTKFSFLAHGNI  
IYEELKRYEAVYGECEGAYWVVFELLWRDYFRLISLKYTTVLPHFYSRLRGTPPPNATTWSKSATSPHAFVME  
GRTGVPFVDAGVREMLQTYTSNRTRQNLASFLTKDLFIDWRLGAEFFESWLVDYDCSSNYGNWSYAAGIGND  
PREERKFNVIKQAWDYDKNGDYVRMWLPELEGVDKAVVHTPWKSVLPASVYPRPIVMAKEWDRHSGRGLEKRG  
GDERKKENKPRIK

>Synchytrium\_mic\_XP\_031024772.1

MSKTIVWFRKSLRVHDNPALLQGSNLNQLYPIFCFDPHYVFERAIGVRRWIFLLEALRDLNLRKVN  
VFRGDPIKAMPTIMAEELGINHIAEIDTDEYAVMRDCKVDEIAKGMGVKVTAVLGHTMYDAKAVAAKNGGK  
PMTYQSFLKAISSMPDPPTPLTMPTRLPPPAPIDMMSESVPPLVHKSELPPTRDITDIEAQKKLFASLAGP  
NFDVPTLEELGLVEPPVGERSPHRGGESVALKLLDAFIAQKKRVAKFEKPKTSPAAFPNADTTVLSPLKFG  
SLSCRLFRTKILQVYREEKSHSQPPTSLLGQLLWREFYVAALTPNYSTMANNKACLYIPWRDTSKDATAA  
HLKAWSEGKTGFWDIDAIMRQLAKEGWIIHLARHSVACFLTRGDLWISWERGVEVFDELLDSDPSLNIGNWL  
WLSASQFFHTYYRVYSPIAFGKQYDKEGIFIKRYVPELSKMEKYIFTPLAPIDVQRKAGCIIGVDYPKPIV  
EHDVASKANMAKMEAYAKKIYGTWGNEVHVASNPAMGVESKEGGNDGGSSEESPDDGERDGAEGSDDEFDP  
VVRKRRRHMSAVSEQRAAKRPRKTK

>Synechococcus\_sp.\_HDW99197.1

MTVLLWFRTDLRLLDHQPFLTRACQQGSPLIPLYCLDPRQFGQTSFGLRPRTGPFRRGQFLLESLADLRQQLRSR  
GSDLVICQGGQPEQVIPTLAREWGVKTVYAHEEVGTTEEKEVAAVERALQPLGIRLQVDWGHLYHPEDLPFCL  
SQLPELFTFRFRKQVEESIPIRDPLPIPSIPLPSGLDPGFLPTLASLGLSPPARDPRARFTYVGGSTA  
QTYFWDRDLRLLYKETRNGMLDPDDSSRLSAWLALGCISARTVYAEVKRYEQERVRNESTYWLVFELLWRDYF  
RFILAKHGAKLFRPSGIQIGIPIPWQQDWPRFQAWCRGETGYPLVDANMRELAATGFMSNRGRQNVASFLTKNL  
GIDWRMGAWEFESLLIDYDVASNYGNWNYTAGVGNDARGFRYFHIKQKSREYDPNGDYLRHWLPELAGIPGDK  
IHEPYRLTTAEQKQFGVRLGVDYPRPLVDLEKSLAANRRVYEAALACR

>Synechococcus\_sp.\_MBC8169373.1

MAASRVLFWHRRDLRLADNLGLQAAVEISPAVTGVYVLDPALIHPPESLPPMAPARLWFLVETLRELQQRWSE  
AGSRLLVAGDPVQVLPRLASLLEVPVAVWSRDVEPYARERDRQVAKALQADGRKVLVDWDQLLLAPDLIKTG  
GGDPYRVYGPFLNRWGRQVERSAPTTVDAPMALIDLEAETLVAVSGGEGSLGRLCAEGQRQLEQLQVEHGFHG  
VDLCPSRPGEAATAAEQLATFADGALLAYEPDRNFPGMPGTSYLSAGLSVGTVSPRQAWCAAQGAKEIARSDEQ  
RQAITVWEQELCWREFYQQALFHFPELVDGPYREQWRRFPWENNNDWFDWQEGQTMPIIDAAMRQLNQSGW  
MHNRCRMIVASFLVKDLICDWRWGERAFMELEVDGDLAANNGGWQWSASSGMDPKPLRIFNPATQASKFDAEG  
EYIREWVPELRHVNTKDLISGEIAALERRGYPELLINHKVQQAKFKALYATIRS

>Synechocystis\_sp.\_AGF51454.1\_DNA\_photol

MYCYDPRQFAQTHQGFAGTGPWRSNFLQQSVQNLAEQKVGKLLVTTGLPEQVPIQIAKQINAKTIYYHRE  
VTQEELDVERNLVKQLTILGIEAKGYWGSTLCHPEDLPFSIQDLPLDFTKFRKDIEKKKISIRPCFFAPSQLL  
PSPNIKLELTAPPPEFFPQINFDRHSVLAFOGGETAGLARLQDYFWHGDRLKDYKETRNGMVGADYSSKFS  
LALGCLSPRFIYQEVKRYEQERVSNDSTHWLIFELLWRDFFRFVAQKYGNKLFNRGGLLNKNFPWQEDQVRFE  
LWRSQGTGYPLVDANMRELNLTFMSNRGRQNVASFLCKNLGIDWRWGAWEFESCLIDYDVCSNWNWNYTAG  
IGNDARFRYFNIPKQSQQYDPQGTYLRLHWLPELKNLPGDKIHQPWLLSATEQKQWGVQLGVDYPRPCVNFHQ  
SVEARRKIEQMGVIA

>Synechocystis\_sp.\_ALJ69418.1\_photolyase

MSDQSDHPLILLWHRRDLRLNDHLALAKARQKTAKIVGVFCLDNKILQAEDMAPARVAYLLGLQSLQDHYQR  
LGSELLVFQADPVQLLPKLANTLGAHGVTTWLTDTPEYAKRDLAVAQALRERGLAIAATEWDQLMHHPGEVLTQ  
AGSPYTVYTPFWKNWSQLPKTSPVPTPKDLQGLTPAEKEKLAPLEPLAIPQLADLGFIDWQPLPLTPGEEAAE  
QRLDWFVAHGLEEYQQNRNFPALDGTSQLSAALKFGVISPRTLWQTTLEAWEQSRSEEARASIIETWQQELAWR

EFYQHCLYSFPALAQGPYRSPFQEFWPEENQDHFQAWCEGRTGYPIIDAAMAQLNQTGWMHNRCRMIVASFLI  
KDLILNWQWGELYFMQTLTDGDLAANNQGWQWSASSGMDPKPLRIFNPHTQAQKFDPEGEYIRTWLPQLARFD  
TGDLLTGKLTGSRSSVNYPEPIVDHNQQQREFKRRYQLVK

>Syngnathus\_acus\_\_XP\_037099240.1

MVVNTIHWFRKGLRLHDNPSLKESLLGADTVRCIYILDPWFAGSSNVGINRWRFLQLSLEDLDSNLRKLNSRL  
FVIRGQPTDVFPRLFKEWNI SRLSYEYDSEPFQKERDAAIKKLASEAGVEVTVRISHTLYDLDKI IELNGGQS  
PLTYKRFQSLISRMDPVEVPAEFITADVMGKCNTPLSDDHDDKFGVPSLEELGFDTEGLSSAVWPGGESEALT  
RLERHLERKAWVANFERPRMNANSLASPTGLSPYLRFGLSCRLFYFKLTDLYRKVKKNSSPPLSLYGQLLW  
REFFYTAATNNPCFDKMEGNPICVQIPWDRNAEALAKWAEGRGTFPWIDAIMTQLRQEGWIHHLARHAVACFL  
TRGDLWISWEEGMKVFEELLLDADWSVNAGSWMWLSCSSFFQQFFHCYCPVVFGRRTDPNGDYIRRYLPVLRG  
FPAKYIYDPWNAPEAVQKAARCI VGVHYPKPMVHHAEASRLNIERMKQIYQQLSCYRGLGLLASVPTTSNGNN  
KGSSDVMGYEAPHAAPSGYPAAAGQPQADWQNGGVMYLLQADSQACAGAHQQGYVSSSMMCYPQGSRQSPALH  
KGMEHHSSNAPMSSKRHCEDSGNSKSSKSVQRH

>Syngnathus\_acus\_\_XP\_037103370.1

MGHTCIHWFRKGLRLHDNPAALMAALKDCKELYPVFILDPNLLDKKTVGINRWRFLLGALKDLDFSLRQLNSRL  
FVVRGKPEEMFPKLFNKWQITKLSYEYDTEPYSLSRDQKVATLAKEHSVEVLYRVSHSTLYDINRI I EENNGKA  
SLVYKRMQAI VKTLGPPKKPI PAPTAE DMKGVKTPHSEDDANKYAI PSLDELGHDAELGEEPFGGGEQEALR  
RLEENMQNTGWVCGFEKPQTSPLSLSPSTTVLSPYVTLGCLSARTFWWRLTEVYQGGKHS DPPVSLHGQLLWR  
EFFYTASVGVPNFNKMEGNPACIQIDWDTNNDYLTAWREARTGYPFIDAIMTQLRREGWIHHLARHAVACFLT  
RGDLWISWEEGQKVFEELLLDGDWALNAGNWQWLSASTFFHQYFRVYSPVAFGRKTDKDGDIYIKKYLPI LKKF  
PTEYIYEPWKA PSSVQKAAGCIVGKDYPLPIVDHKIISKKNLNRMKSA YAKRSVDTEESPSKKEGVKRKAPSV  
VEMLNKKAKK

>Syngnathus\_acus\_\_XP\_037110539.1

MVVNSVHWFRKCLRLHDNPAEQEALNGATSVRCVYILDPWFAGASNVGINRWRFLLEALKDLDCSLQKLNSRL  
FVVRGQPAEVFPRLFKWKMTLTFEYDPEPYGKERDSA I KMAQEFQVETLVRNSHTLYNLDR I EMMNNNSP  
PLTFKRFQTIVSRLELPRRPLPPVNQKQMDKCQTKITDNHDQLYSIPSLEELGFQTKGLPPAVWRGGGESEALD  
RLNKHLDKKVWVANLEHPRGNMCSLYASPTGLSPYLRFGLSCRVLYYNLRELYMKLRKRCSPPLSLFGQLLW  
REFFYTAATNNPNFDRMDGNPICVQIPWDQNPEALAKWAEGRGTFPWIDAIMTQLREEGWIHHLARHAVACFL  
TRGDLWISWESGMKVFEELLLDADWSVNAGSWMWLSCSAFFQQFFHCYCPVGFGRKTNPTGDYIRRYIPI LKD  
YPNRYIYEPWNAPE SVQKAANC VGVDPYKPKMINHAESSRLNIERMKQVYQQLSHYRGLSLLASVPTIQEEAE  
PPMTDESQTSSGPDSPAIVHDEAAPNSFTVCTSSHTVLHPELEKDAMRALSHTSANSSVSQMHP SAAITSSTC  
ADHSSAVDNPVPLVSTPAHSPLSESKACTPSSLCSTLPPSPSPSSAQTQTSSLGPRRKSFTRKVRRGQRQRGR  
HGCHAVAREGERRGDEEETEPGDKNEKMEEGIEEMEEKMEEEAYAGNPR

>Syngnathus\_acus\_\_XP\_037111271.1

MPQSGEDDGLVVRKLLREVLLGREDPEGFFAMCLSI LGHQETRARFLHVVP LSSANRSLHATLVSIHEEY  
FAKAEDDELELAVTSL LDAQDHPRT RPQTFDGASNLNGQSKDGGSR TLEKDTCPNLSGTSQT VIAQQGMGRK  
DDMDQSEKIKHSKSRQRRAAAQHVVGLPRSPSGAAPVLVWVRDLRLCDNPALVGSLECGAPVIPVFIWSP  
EEEEPGMTVAMGGACKYWLHQALISFRSSLEGIGSHLVFLEATGVGASSLHMLKELVKETGARTVL ANALYE  
PWLKERDDKVSTLQDKGLQCKMFHSYCTRDPYSVSTEGVGLRGIGSVSHFMSCCRQNP SGSTSGAPLDPPTS  
LPTPSSWPQGITLDTLDLARMRRKDGTIDWAENIRKSWDFSEGAHARLEAFLHDGVYRYDKESGRADAPN  
TSTLSPYLHFGQLSPRWLLWDAKGARCRPAKFQORKLAWRD LAYWQLTLFPDLPWESLRPPYKALRWSSNGDHL  
KAWQGRGTGYPLVDAAMRQLWL TGWMNNYARHVVASFLIAYLHLPWQEGYRWFQDTLVDADVAIDAMMWQNGG  
MCGLDHWNFVMHPVDAAMTCDPYGNYVRKWCPEIAELPDELIHKPWKCPASMLRRAGVVLGQTYPERIVTNLE  
ERRSRSLQDVAVVRRQHEEYVDKRSGCDLVPLPRLVSEALGLAHP TTEKQFLLPVITRMEFKHQMDPDADG  
AANPYNAVLKGYVSRKRDETVAFLNERDFTASVLHEGAQR RERLES DHRMEGLPPTFRFP PRGRARRATNAKD  
RFSSLPGGAVLTTHR

>Syngnathus\_acus\_\_XP\_037131198.1

MRAHFFSFLT KSFTTIMSGKKRKAAGAAASECSAKQLKLASTTEGNKVKASGWLQDLVKQQRDDNKDMKV NKK  
RVRFISDTQEAKQDSEGVLYWMLRDQRVQDNWALIH AQHLAMKRNPLHVCVCLFVPKSELSTLRHYSFMLKG  
LEEVEKECKSLDIQFHLLHGSVAKLLSGFVSERGFGAVVTDF SPLREPLKWLDDVKKALPDDVPLIQVDAHNI  
VPCWVASPKLEYAARTIRGKITKLLPEFLTDFPVVEKHPHAATKTKLVDWAKTVASLQVDRTVDEPEWAQPG  
TMSGMAMLESFIDVRLKLFGTYRNDPNVAALSQ LSPWIRFGHVSAQRVALQVQRGGK DASQSVAPFIEELVVR  
RELTDNFCFYNNYDSVKGAYEWAQKSLSDHKGDKRPYLYTREQLEKAKTHDKLWNAAQYQMVSEGKMHGFLR  
MYWAKKILEWTSSPEEALSIALYLNDRYELDGQDPNGFVGCMWSICGIHDQGWAERDVFGKIRYMNKYGCLRK  
FDVPKFEEKYCPKGL

>Syngnathus\_acus\_\_XP\_037135355.1

MTTCVCITERDRASTRACPQETTGWVLT VVCVLEPVLVVVPIGGYRRAVMSTSRTIICLLRNDLRIHDNEVFY  
FAEKHADHVPLYCFDPRHYVGT SKYNLPKTGPFR LRFLES IQDLRKSLVNRGSLN LVIRRGKPEEVVADLIQ  
QLGVSVAVTFHQEATSEELTVETGVKDVCARMKVQVHTCWGSTLYHRDDL PFPHISRLPDVYTQFRKEVESKS  
QVRPELPTPDRLKPLPGGLREGDVPTAADLQQTEPLNDPRS AAFP CAGGESQALRRLQHYFWD TDAVASYKETR

NGLVGVVDYSTKFAPWLAMGCISPRYIYHQIRQYERERTANQSTYWVIFELLWRDYFKFVALKYGNRLFQVKGL  
QDKSIPWKTDMTLFLNAWKEGRTGVPFVDANMRELAVTGFMSSNRGRQNVASFLTKDLGLDWRMGAEYFEYLLVD  
HDVCSNYGNWLYSAGIGNDPRENKRFNMVKQGLDYDSNGDYVRRWLPPELHKIRGADVHTPWTLKAALSHADV  
TLGETYPTPVVVAPEWSRHVGKKQNGPYPRGRKGPSHTPKQHGDGRGVDFYFSRSKNL  
>Syrrhaptēs\_para\_\_NXT17337.1  
RIELNNGGQPPLTYKRFQTLISRMEPLEMPVETITPEVMEKCTTPVSDDHDEKYGVPSLEELGFDTDGLPSAV  
WPGGETEALTRLERHLERKAWVANFERPRMNANSLLASPTGLSPYLRFGCLSCRLFYFKLTDLYKKVKKNSSP  
PLSLYGQLLWREFFYTAATNNPRFDKMEGNPICVQIPWDKNPEALAKWAEGRTGFPWIDAIMTQLRQEGWIHH  
LARHAVACFLTRGDLWISWEEGMKVFEELLLDADWSVNAGSWMWLSCSSFFQQFFHCYCPVGFGRRTDPNGDY  
IRRYLPVLRGFPKAYIYDPWNAPESVQKAAKCIIGVNYPKPMVNHAESRLNIERMKQIYQQLSRYRGLGMLA  
TVPSNPNGNGGGLMGYSPGESVSGCGSTGGHLFLASPGAQLGTGDGHTVVQPCALGDSHTGASGIQQQGYCQ  
ASSILHYAHGDNQQSHLLQTGR TALGTGISAGKRPNPEEETQSVGPKVQRQSTN  
>Syrrhaptēs\_para\_\_NXT18533.1  
RFLQLSLEDLDNSLRKLNLSRLFVVRGQPTDVFPRLFKEWGVTRLTFEYDSEPF GKERDAAIVKLAKEAGVEVV  
IENSHTLYDLDR IELNNGHKPPLTYKRFQAIISRMELPKKPVSTVISQQMEMCKVDIQENHDDVYGVPSLEEL  
GFPTDGLAPAVWQGGETEALARLDKHLERKAWVANFERPRMNANSLLASPTGLSPYLRFGCLSCRLFYRLWE  
LYKKVKRNSTPPLSLYGQLLWREFFYTAATNNPKFDRMEGNPICIQIPWDRNPEALAKWAEGKTGFPWIDAIM  
TQLRQEGWIHHLARHAVACFLTRGDLWISWESGVRVFDELLLDADFSVNAGSWMWLSCSAFFQQFFHCYCPVG  
FGRRTDPSGDYVKRYLPKLGKGFPSRYIYEPWNAPESVQKAAKCIIGVDYPKPMVNHAETSRLNIERMKQIYQQ  
LSRYRGLCLLASVPSCVEDLSGPVADSASGQGCSTSTAVRLTQADQASPKRKHEGAEELCAEELYKRAKVTDL  
PAPEIPGKSL  
>Syrrhaptēs\_para\_\_NXT20416.1  
KVDYDVC SNYGNWLYSAGIGNDPDRNRKFNMIKQGLDYDNGDYVRLWVPELQGIKGS DIHAPWALNSVALSQ  
AGVTLG ETPQPVVTAPEWSRHINQKPQGRSPHPRGRREPAHPPMQPKVRGIDIFYFSRKDG  
>Syrrhaptēs\_para\_\_NXT21444.1  
AMHSSIHWFRLRLHDNPALLAAATDCRCLHPLFILD PSSSRAGANAWRFLLDALQDL DGLSREMGSRLFVV  
RGCPEEVFPHLFRTWGTTTRLT FEVDTEPPARRRDAVVAELAAQHGEVIQKVSHTLYDTERVLALNNGKAPLT  
YKRLQTL LASLGPPEKPAPALTQEHLKGGSSPLPRWGDSGTRPARCVHGEDGQCLTPITLISGLLHLPPIPKQ  
CLSPQAWVCSFKKPETAPTSLSPTTVLSPYLKFGCLSVRTFWWRLDQVYKGRVHSQPPVSLHGQLLWREFFY  
TAGASIPNFDRMAGNPVCLQVDWDDNPQHLHAWREGQTGF PFIDAIMTQLRSEGWIHHLARHAVACFLTRGDL  
WVSWEGLKVFEELLLDADWSLNAGNWLWLSGSAFFHRYFRIYSPIAFGKKTDQDGAYIRKYL PVLKDFPTEY  
IYEPWKAPRAVQERASCLVGTHYPRPIVEHSTASKRNLGRMK  
>Syrrhaptēs\_para\_\_NXT28676.1  
DNWAFLYAQR LALKQELPLHVCFLVPKFLDATIRHYDFLLRGLQEVAKECAELNISFHLLLG YAKDVLPAFV  
VEHGVGGLVTD FDCPLRLPRQWVEDVKERLPEDVPFAQVDAHNIVPCWVASPKQEYTAWTIRGKIHAQLPEFLT  
EFPFVICH PYPSPCAEPITWEACYSSLQVDRTVKEVEWATPGTAAGMAVLQSFIAERLKYFGSHRNDPNKAA  
LSNLSPW FHFQGVSTQRAILEVQKHRHKYKESVDTFVEEAVRRELAENFCYNEHYDSVQGAYSWAQTTLKL  
HAKDKRPFLY TLEELEQGTTHDPLWNAQLQMVREGKMHGFLRMYWAKKILEWTHSPEEALRF AIYLNDRYEL  
DGRDPNGYGSADTSLCPAGCLWSICGIHDHGWTERAVFGKIRYMNYAGCKRKFNVGQFEQRYAP  
>Tachyglossus\_aculeatus\_XP\_038612536.1\_cryptochro  
MAGNAVHWFRLRLHDNPALRDCIRAAHTVRCVYILDPWFAGSSNVGINRWRFL LQCLEDLDANLRKLNLSRL  
FVIRGQPADVFPRLFKEWNIARLSIEYDSEPF GKERDAAIKKLASEAGVEVIVRISHTLYELDKI IELNNGQP  
PLTYKRFQTLISRMDPLAMPVETITAEVMGKCVTPLSDDHDEKYGVPSLEELGFDTDGLPSAVWPGGETEALT  
RLERHLERKAWVANFERPRMNANSLLASPTGLSPYLRFGCLSCRLFYFKLTDLYKKVKKNSSPPLSLYGQLLW  
REFFYTAATSNPRFDKMEGNPICVQIPWDRNPEALAKWAEGRTGFPWIDAIMTQLRQEGWIHHLARHAVACFL  
TRGDLWISWEEGMKVFEELLLDADWSVNAGSWMWLSCSSFFQQFFHCYCPVGFGRRTDPNGDYIRRYLPVLRG  
FPAKYIYDPWNAPEGIQKAAKCIIGVNYPKPMVNHAESRLNIERMKQIYQQLSRYRGLGLLASVPSNPNG  
SGGLMAYSPGENIPGCSSGGGAQIGASESHLLQT CVLGESH LGPSGIQQQGRSSLTPGLSGGKRHCQEEESQS  
IGPKVQRQSTD  
>Tachyglossus\_acu\_XP\_038620369.1  
MAAGPGCGASSVHWFRLRLHDNPALQAALRGARSVRCVYILDPWF AASSSVGINRWRFL LQSLLEDLDTS LR  
KLNLSRLFVVRGQPTDVFPRLFKEWGVTRLTFEYDSEPF GKERDAAIVKMAKEAGVEVVTENSHTLYDLDR I E  
LNGQKPPLTYKRFQAIISRMELPKKPVSCVTSQQMEGCKAEIQDNHDDTYSVPSLEELGFPTDGLGPAVWQGG  
ETEALARLDKHLERKAWVANFERPRMNANSLLASPTGLSPYLRFGCLSCRLFYRLWDLYKKVKRNSTPPLSL  
YGQLLWREFFYTAATNNPRFDRMEGNPICIQIPWDRNPEALAKWAEGKTGFPWIDAIMTQLRQEGWIHHLARH  
AVACFLTRGDLWVSWESGVRVFDELLLDADFSVNAGSWMWLSCSAFFQQFFHCYCPVGFGRRTDPSGDFIRRY  
LPKLGKGFPSRYIYEPWNAPESVQKAAKCVIGVDYPRPIVNHAETSRLNIERMKQIYQQLSRYRGLCLLASVPS  
CMEDLSSAVAESGLGQASGSSSSTAPRPLPLPYGPTSPKRKLEAAEELPGEELCKRPKVSGRPGPELPSKDA  
>Taenia\_asiatICA\_VDK23649.1

MATQVASGLSSGGLEDVILSISGHISAQRCLWEVKLLYSEYKESVDAFMEEAFVRRELADNFCYYNPNYDSIK  
GAWSWARETLRMHANDLRKPSYSEEAMESATTGDDLWNAAQRLREGKMHGFLRMYWAKKILEWHAEGPEKA  
LQLGFHLHNRYSLDGTDPNAYVGKSASLNPHYRFTFLLYFSHNSGRRRS

>Takifugu\_rubr\_\_BBA21724.1

MHSVLTISIYKEYFSTTEDDELELALALSLVETKDYELSAPVHEPQLKRPGGRRNESGSVWPTSEFQTQRRSPI  
QPAAEASGTRNNSPQTGSPKVCSPQTAVEPEHNADAWTPAKARSASCESGHQVMEVGVDVDQSEKPKRPPKRR  
QRRKCAAQQVGLPRAPSAAAPVLLWFRDLRLSDNPALVSALKVGAIPVIPIFIWSPEEEEGPGVTVAMGGAC  
KYWLHQALSCLCSSLENIGSHLVFLKSETRGSEGGASLRALQGLAKATGARTVVANALYEPWLKGRDDAVAAA  
LQKSGVECEMFHSYCLRDPYSVSTEGVGLRGIGSVSHFMSCCRQNPGAALGAPLDPPTTLPVPAHWPPGVSLE  
TLGLARMPKRKDGTTIDWAANIRKSWDFSEGGAAHARLEAFLHDGVYRYEKESGRADAPNTSCVSPYLHFGQLS  
PRWLLWDAKGARCRPPKFQQRKLAWRDLAYWQLTLFPDLPEWESLRPPYKALRWSTDRRHLEAWQGRGTGYPLVD  
AAMRQLWLGTGMNNYMRHVVASFLIAYLHLPWQEGYRWFQDTLVDADVAIDAMMWQNGGMCGLDHWNVFMHPV  
DAAMTCDPCGQYVRKWCPELSGLPDELIHKPWRCPSTLLRRAGVVFGQTYPERIVTDLEERSQSLLQDVALVR  
KEFGQYVDKRSGLDLVPLPRLVSEALGSSSHLDGGVATGGKQFLLPVITRMEFKHQQEDPDADAASNPNYAVL  
KGYVSRKRDETI AFLNERDFTASVMHEGAQRRERMESDQRRLEGLRGPAPRGRVRRTPTAKDRFSVVPGGAV  
ASLR

>Takifugu\_rubr\_\_XP\_003968037.1

MSGPRTVICLLRNDLRLFDNELFHWQRNADHIVPLYCFDPRHYMGTYHYNLPKTGPFRLRFLLESIKDLRNT  
LLNKGSNLIVRRGKPEEVVASLIKQLGSVSTVAFHEEVTSEELDVEKRVKDVCAQMKVNVHTCWGSTLYHRDD  
LPFHHISRLPDVYTQFRKAVESQCRVRPVFPPEHLKPLPQGLEEGTILTAEDLEQKEPVADPRSAFPCSGGE  
SQALARLKHIFYWDTDAVAVYKETRNLIGVDYSTKFSPLALGCISPRYIYHQIKQYESERTANQSTYWVIFE  
LLWRDYFRFVAVKYGTKLFQVNGLDKSVSWRKDMKLFNAWKEGKTGVPFVDANMRELATTGFMSNRGRQNV  
SFLTKDLGLDWRMGAEWFEYLLVDHVC SNYGNWLYSAGIGNDPRENKFNMIKQGLDYDNNGEYVRLWVPEL  
QRIMGADVHTPWTLSAILSHAHLSLGETYPTPIIVAPEWSRHFNNKMSGAGPSPRGRKGPSHTPKQHRDRGI  
DFYFSRSKNL

>Takifugu\_rubr\_\_XP\_003975844.2

MFHRILSCSPRSPLQFVAGCYSPICGSTMSDRKRKAASAAREPAAKQQKLASTKEVKEAKAGGWLQGAIQQQR  
TENKEMSFNEKRLRFISDAKKIKQGSEGVLYWMLRDHRVQDNWALIHAAQLAVKEKLPKHVCVCLHVPKSELS  
TLRHYSFMLKGLEEVEKECKALDVQFHLLHGSVGEVLPGFVSEHLGAVVTDFSPLREPLKWLDDLLKKEFPQD  
IPLIQVDAHNIVPCWVASPKLEYAARTIRGKINKHLSEFLTDFPPIEKHPHTAEQAAEPVDWEETLSSLSIDR  
TVGETEWAKPGAGAGLAMLESFIDERLKLFDSDQRNDPNAAALSQMSPWIRFGHVSAQRVALQVQSRGKKAGVA  
VSSFIEELVVRRELTDNFCFYNNENYDSVEGAHEWARKTLKDHAOKDRPYIYTRRQLEEAQTHDHLWNAAYQYQM  
VTEGKMHGFLRMYWAKKILEWTSSPEEALSTSLYLNDRFELDGQDPNGFVGCMMWSICGVHDQGWAERPVFVKI  
RYMNYKGCLRKFVDVGRFEKKYSPKASS

>Takifugu\_rubr\_\_XP\_011607950.1

MTHTCIHWFRKGLRLHDNPGLMAALRDCKELYPVFILDPQLHNKSVGVNRCRFLIGALKDLDSLRLQNLNTRLF  
VVRGKPEEVFPKLFQWKITKLTYEYDTEPLSLSRDKTVTRLAEHGDVVCVSHTLFDINRIIEENNGKTP  
LTYKSMQAIVKKLGPPKRPLSAPSMEDLDKDVNTPCSESHEKKYRIPTLEDFGHNLADLPEEQFPGEQEALRR  
LEEHRKRTAWVCNFEKPKTSPNSLSPSTTVLSPYVTFGCLSVRTFWRLSDVYEGKKHSAPPVSLHGOQLLWRE  
FFYTASVGISNFMKMDPNVCTQVDWDINSEYLAAREARTGFPFIDAVMTQLRQGWIIHHLARHAVACFLTR  
GDLWISWEEGQKVFEELLLDGDWALNAGNWQWLSASAFFHQFFRVYSPVAFGKKTDKNGDYIKKFLPHLKKFP  
AEYIFEPWKAPQSVQQAAGCIVGKDYPHPIVQHEVVSKKNIQRMKAAYAKRSANTAKSLSKIQGLKRKPSSSV  
DMLKKKKKNNTSEPLL

>Takifugu\_rubr\_\_XP\_011611545.2

MVINTIHWFRKGLRLHDNP SLKDSLGLGADSVRCVYILDPWFAGSSNVGINRWRFLQSLLEDLSSLRKLNSRL  
FVIRGQPTDVFPRLFKEWNI SRLSYEYDSEPF GKERDAAIKKLASEAGVEVTVCISHTLYDLDKI IELNGGQS  
PLTYKRFQTLISRMDPVEVPAESITAEIMGKCTTPLSDDHDDKYGVPSLEELGFDTEGLSSAVWPGGETEALT  
RLERHLERKAWVANFDERPRMNANSLASPTGLSPYLRFGLSCRLFYFKLTDLYRKVKKNSSPPLSLYGQLLW  
REFFYTAATNNPCFDKMENNPICVQIPWDRNPEALAKWAEGRTGFPWIDAIMTQLRQEGWIIHHLARHAVACFL  
TRGDLWISWEEGMKVFEELLLDADWSVNAGSWMWLSCSSFFQQFFHCYCPVGFGRRTPNGDYIRRYLPILRG  
FPAKYIYDPWNAPE SVQKAAKCMIGVHYPKPMVNHA EASRLNIERMKQIYQQLSCYRGLGLLATVPNSNSNGNR  
NSNNETCFPVEASHDPSAPSGYQVPVHTQGDWQSGVMMYMQDPQSGMGAHQQGYAGTSSGVMCYTQNTQQQIPG  
PSTQKGLERHGGIQTGKRHNEDSGNGKSSKVRQSNH

>Takifugu\_rubr\_\_XP\_011615916.2

MVNSVHWFRKGLRLHDNPALQEALNGADSLRCIYILDPWFAGAANVGINRWRFLLEALEDLDCSLRKLSSRL  
LVVRGQPTDVFPRLLKDWKVTRLTFEFDPEPYGKERDGAIIKLAQQFGVETIVRNSHTLYNLDRIEVNNNSP  
PLTFKRFQTI VSRLELPRRPLPTVTQH QIHKCGAKMADXQEQLYSIPSLEELGFRTEGLPPAVWRGGESEALE  
RLHKHLDKKVWVANLEHSRVSTCSLYASPAGLSPYLRFGCLSCRVLYYNLRELYVKLRKGCSPPPSLFGQLLW  
REFFYTAATNNPNFDRMEGNPICVQIPWDQNPEALAKWAEGHTGFPWIDAIMTQLRQEGWIIHQARRAVACFL  
TRGDLWISWEEGMKVFEELLLDADWSVNAGSWMWLSCSAFFQQFFKCYCPVGFGRRTPDPSGDYIRPLHPHPED

YPNRYIYEPWNAPEAVQKAANCVVGVDYPRPMINHAEGSRNLIERMKQVYQQLSHYRGLSLLASVPTIQEEAE  
PPMTDEFQNSSGPDSPPRPAHGAALPDSSTVCVSSSCVPHSVLGDTTPTRSSLTQSLARSKAGVSVLRSVHR  
PGLLRHPDLVSGTPEERPRPQGPPPPSPGPARRHQGRRQEVREGGEDGGRRRRAGRSDGGRGGGQQVEDTGG  
TFRYAREDRGRRVRTGLLDQDKDPCAGVSS  
>Talitrus\_sal\_AFV96168.1\_cry\_2  
MSPNKIASPERSIHRTILGDNNTFSESGSSSGLAFTAEEKNTSKVVSGKHVVHWFRRGLRLHDNPALRDAI  
VNCETFRCIYILDPWFAGSSNVGVNKRFLQLCLEDVDNSLRNLNSRLFVVRGQPANALPQLFKEWNTTVLSF  
EEDPEPFGRARDASIIIGIAQEMGIEVIVRTSHTLYELDKIIKKKGKPLTYKTFQNILAMMDPPPPVAPIE  
ASDLKHAYTPLQHDHDDKYGVNLEHLGFETEHLPPAVWKGGETEALSRLKHHLEKAWVASFGRPKMTPQSL  
FACPTGLSPYLRFGCLSARKFYTELNVLYTKIKVPAPVSLHGHLWREFFYTAATNNPKFDHMKGNPICVQI  
PWDKNPEALAKWAHQGTGFPPWIDAIMTQLRTEGWIHNVARHAVACFLTRGNLWVSWEEGMKVFDELLLDADWS  
VNAGSWMWLSCSSFFQQFFHCYCPVRYGRKADPNGDFIRTYLPVLKNFPTKYIHEPWPAPESVQRNARCIIGQ  
HYPLPMVDHGTQSQNNIERMKQVYQQLAHYRANISTRPCGDSKLRCKYPLHSTA  
>Taphrina\_def\_CCG80991.1\_putative\_p  
MSKRKCPPWQSAPSLKRAREIDDESPYEVLGALSTNVQPDKTRNVLHWFRSKDIRLEDNRALHAASTKAEEG  
DSALITLYVHSPADLDWHGTSPARTDLILRTLEQMOSGLKRLNIPLYIHETKSRDDLVPDLVKFIKDHDISHV  
YANFEYEIDELRRDIRIAKGLKEEKVSFEIVHDQSAINPGTLTTGNGGPHKVFTPYHKVWLAEMSKNGKSILD  
LLPLPSANADAHVGELEDAGLFKTQIPKQPESKDFKSDEERDRIRGLWPAGHEAAKERLIDFLDNKNVLYGDT  
RSNPGKDSTSRMSAYFSSGTISIREALAHCRDRNKGSCDFSGSKGRGMSAWVREIVFREYYRQLIFVVPHNSL  
NLPQNLMFTVKWEDNEEAENWKKWCEGTTGFPLVDAGMRQLNTEAWMHNARMNTASVLRTNMLVDYRRGE  
RYFAEHLVDYDLSNNFQGWQPSFTVFNPTTQGENNDVDGDYIRKWVPELKHIIKGKAVFAPYERLDPQAFKKTG  
YPKPCVDWKQSKARCMDAYKQATIDGGEALRD  
>Taphrina\_def\_CCG81760.1\_putative\_p  
MAARVAWWIRTDLRLHDNVALAAALELKPECLYPIWTWDPHYVFHTRVSPNRWRFLDCQEDLSNSIKEKTKH  
NGLLVLRGNPLTCLIKQVLSDWKITHLVFEKDDTDYARIRDAAVIEMAKNLGVKVIKLGRTLFDPAMTKLNG  
GKAIYNISSIQKLGPTGEIPRPLDTPKSLPRAGDTKINTRDDGIEFRPDINAPQRLGSTDDVTCYERMDGP  
DGSFSVPTMEEINMKAAPGPHRGGETIALQNLAEYMADKQKTATFEKPKTNPGVFLPETLLSPHLHFGSLS  
IRKFYWDVMDVVKEYGPKSSKPPVSLEGQLYFRDMYFAAQYGTENYEQTQGNPHCRFIPWKLANTYDEHGKVN  
GYDKSDAKAEYFQWRWRQGQTGFPPWIDAIMRQLARDGWIHHLARHSVACFLTRGHCIYSWERGADVFEELLID  
HETACNVGNWQWLSCTAFFSQFYRVYSPVAFGKKNDKSGALIREYVPELKDVPKEYIYEPWKMSKTDLKAAGV  
VLGGSGPGSYPKPMLDVQEEAKVALAGMKASYAKIYGDDERVKNGAEEKI IKGENSSPKKRKGEQGLMDKFT  
KKPREEPKEEHEDNEQDN  
>Taphrina\_def\_CCG81785.1\_Putative\_c  
MGKTLLEYHKHDLRLHDNPVLQKLREDEGPYDHFVYVFPFHQMELSPLLKSSVTKNPHKGGDVRGEFGAWRT  
GNMRVQYLCETIIDLKQNYKKLGSIDLVLKAGKAEDVLPDLLKALKAEGQDEIDLWLQDEYTTEEIDEFRKIRE  
ATKDLATFKKVEDNTLVSIHDLPYDPHTKLPNFYTEFRKSVEPLHHVRECFTKTPESLPPRPAFKDFENDYDVP  
EDMNECITKLCKPLGGVPTFPGNTAHPMKGETAALKRLDHYVSGGKQAPAAHYKETRNQMLGADFSTKFSSF  
LSLGAISPCLIHHRITRFEEHRLTGDVNTYWIRFELLWRDYFKFVALKHGKHLFLRTGLKQKPIHDTWLGD  
STEARRWKEGTTGVGIVDAAMRELNQTGYMSNRTRQIVASFLTCKDLYVDWRIGAEHFEEKLLDHDAASNWGNW  
QYQAGVGNDPRGSRRFNPAKQTHDYDAEGEYIKTWCPEVRDVRKMGFTYFWTINEKTLHQLNLSDLPGVKSP  
IKGLCADERTRVNGKGGKGRFGGKARRDAGRPRRTGPSDKFAQQNDGDY  
>Terrapene\_carolina\_trianguis\_XP\_024065414.2\_cryptochro  
MKHISIHWRKGLRLHDNPALLAAMTDCHKLYPIFILDWFPKPMRVSVNRWRFLVESLRDLDESLOKLNSRL  
FVVRGRPTEIFPVLFEKWKVTRLTFEIDTEPYSRQDSEVASLAAEHGVQVIQKVSNTLYDTRVIAENNGKV  
PLTYVRLQTLAALGPPKRPVPAPTLENLKDCTPWKDNHDAEYGIPTLEELGQDPEQAGPRLYPGGESEALC  
RLDLHMNRATAWVCNFQKQPQTEPNLSNPSTTVLSPIYKFGCLSVRTFWWRLAEVYQGRKHSNPPVSLHGQLLWR  
EFFYTAGAGIPNFNKMEGNPVCVQVDWNNPEHLRAWSEGRGTGYPFIDAIMAQLRTEGWIHHLARHAVACFLT  
RGDLWISWEQGGQVFEELLLDADWSLNAGNWQWLSASAFFHQFFRVYSPIAFGKKTDKGGEYIKKYLPLRKF  
PAEYIYEPWKAPRSVQEQAGCVIGRDYPKPIVVHEVVSkrNVERMKAAAYARGASASTAQLEGGGGKKGAKRKT  
PAGPSVAELLTKPKTKSS  
>Terrapene\_carolina\_trianguis\_XP\_024070429.1\_cryptochro  
MAAAGSTPLGLARSVHWFRRGLRLHDNPALQAALRDASSVRCIYILDPWFAASSAVGINRWRFLQLSLEDLDN  
SLRKLGSCLFVVRGQPTDVFPRLFKWGVTRLTFEYDSEPFGERDAAIVKLAKEAGVEVVIENSHTLYDLDR  
IIELNHGKPLTYKRFQTIISRMEHPKKPVSSITSQQMEKCKSEIQENHDDTYGVPSLEELGFPTDGLAPAVW  
KGGETEALARLDKHLERKAWVANYERPRMNANSLASPTGLSPYLRFGCLSCRLFYRLWELYKKVKRNNTPP  
LSLYGQLLWREFFYTAATNNPKFDMEGNPICIQIPWDRNPEALAKWAEGKTGFPPWIDAIMTQLKQEGWIHHL  
ARHAVACFLTRGDLWISWESGVRVFEDELLLDADFSVNAGSWMWLSCSAFFQQFFHCYCPVGFRRTDPDGYV  
RRYLPLKLGFPSTRYIYEPWNAPEVQKAACKIIGVDYPKPMVNHAETSRLNIERMKQIYQQLSRYRGLCLLAS  
VPSCVEDLSIPVTDPMMSGQGSSTSTVQRLHCGQTSPKRKHEGVEELCTEELYKRAKVTGLHISEIPSKNL  
>Terrapene\_carol\_XP\_026505909.1

MSQKSRNRQARGGEEISGDAARPGAAPRGQLKGGKRVLAEPGSAEVLTVKEKRRKEGEEAAEGGGAGSLGEAV  
RQARLQVAPSVQDFKYNKKRVRLVSQGSCLKDAAQGVVYWMSSRDQVRQDNWAFLYAQRALQQLPLHVCFCFL  
VPKFLEATIRHFGFMLKGLQEVAAECQELDIPFHLLIGFAKDVLPAFVTGRGLGGVVTDFSPLRVPMQWVEDV  
KERLPGDVPFVQVDAHNIVPCWVASDKQEYGARTIRRKIHDQLSEFLTEFPPVIKHPYPSTAPAEPIDWNACR  
ASLQVDCSVKEVTWATPGTAAGLAVLESFIGERLKSFGTDRNNPNRAALSNLSPWFHFGQISVQRAILEVQKY  
RSKYKESVDGFIEEAVIRRELADNFCYYNRNYDKVEGAYDWAKTSLKLHAQDKRSHLYELKQLEEGKTHDPLW  
NAAQLQMVHEGKMHGFLRMYWAKKILEWTRSPEEALEFTIYLNDRYELDGRDPSGYVGCMWSICGIHDQGWAE  
RAVFGKIRYMNYAGCKRKFDVGQFERRYDPRKLGQ

>Terrapene\_carol\_XP\_026507960.1

MSGAAPRTVICLLRSDLRHYHDESEVLRLWAQNNADYVIPLYCFDPRQYLRTYYYGFPKTGPHRLKFLLLESVKDLR  
QTLKKKGSNLVVRKGNPEDVVDLITQLGSVAAVAFHEEVKERFELCCLSIKLARPF SARQYWTCLAYHFCIP  
PFYYICQRLPDVYTQFRKAVEAQTKVRPTVQMPDQLKPLAPGVEDGCI PVPEEFQKDPLTDPRTAFPCSGGE  
TQALMRLQHYFWDNLVASYKETRNLIGIDYSTKFAPWLALGCISPRYIYEQIRKYEKERTANQSTYWVIFE  
LLWRDYFRFVALKYGTRIFLLKGLQDKEVPWKKDKPLFDAWKEGRTGVPFVDANMRELAATGFMSNRGLQNV  
SFLTKDLGLDWRMGAEWFEYLLVDYDVCSNYGNWLYSAGIGNDPRENKFNMIKQGLDYDSNGDYVRLWVPEI  
QCVKGGEIHTLWALSNAALSQAGIALGETYPLPVVLAREWSRHINQKPNKRDHPPKGRKDPDTPRQHKDRGV  
DFYFSRNKDLS

>Terrapene\_car\_XP\_024068729.2\_cry-1

MGVNAVHWFRLRLHDNPALRECIQGADSVRCVYILDPWFAGSSNVGINRWRFLQCLELDANLRKLNLSRL  
FVIRGQPADVFPRFLKEWNIAKLSIEYDSEPFQKERDAAIKKLASEAGVEVIVRISHTLYDLDKI IELNGGQP  
PLTYKRFQTLISRMEPLEMPVETITAEMEKCTTPVSDDHDEKYGVPSLEELGFDTDGLPSAVWPGGETEALT  
RLERHLERKAWVANFERPRMNANSLASPTGLSPYLRFGCLSCRLFYFKLTDLYKKVKKNSSPPLSLYGQLLW  
REFFYTAATNNPRFDKMEGNPICVQIPWDRNPEALAKWAEGRTGFPWIDAIMTQLRQEGWIHHLARHAVACFL  
TRGDLWISWEEGMKVFEELLLDADWSVNAGSWMWLSCSSSFFQQFFHCYCPVSFGRRTDPNGDYIRRYLPILRG  
FPAKYIYDPWNAPEISIQKAAKCVGVGHYKPKMVNHAEEASRLNIERMKQIYQQLSRYRGLLLATVPSNPNGNG  
GLMGYS PGENISGCSSASGAQMGSNDGHTVGVTCSLED SHAGSSGIQQHGYSGSSIVHYAQGDHQSSHLLQ  
QGRGTSGTISTGKRPNPEKETQSIGPKVQRQSTN

>Terrapene\_car\_XP\_024073555.1\_cry-1-like

MPNMPHWTIHLFRKGLRLHDNP TLAALESSEVVYPVYILDRKFLMSAMNMGTLRWHFLLQSLEDLQRNLTKL  
GSCLLVIQGEYESVLRDHVKKNITQVTLDAEIEPFYKEMERTIQVLGGEMGFVDVLSLMGHTLYDIRRI LDMN  
GGTPPLTYKRFHLHLSVLGDPDMPVRNLTAEDFORCKPPELCLAE CYRVPLPEDLEIPRESQSPWRGGETEG  
LQRLQHLKNQGWIANFTKPKTIPNSLLPSTTGLSPYFSLGCLSVRSFFYRLSNIYAQSKNHS LPPVSLQGQL  
LWREFFYTVASATPNFTKMAGNPICLQINWYQDAERLHKWRMAQTGF PWIDAIMTQLHQEGWIHHLARHAVAC  
FLTRGDLWISWEEGMKVFEEMLLDADYSINAGNWMWLSASAFFHQYTRIFCPVRFGKRTDPEGQYIRKYL PVL  
TNFPSKYIYEPWTAPEEAQKQAGCIIGQDYPLPMINHKEASDRNLQ LMKQVREEQYGTALTRDDMDDPMEMG  
LKREERSEENSKKGKRARNREQT

>Tetrabaena\_soc\_PNH00586.1\_cry\_DASH,\_

MSNRGRQNVASYLALDLGVDWRRGADWFESC LLDYDVTSNWGNWAAAAGLTGGRVNHFNIAKQAGRGGE GELK  
EERSREGGQGLNYSKDYDLAGEYVKTWCPELRNVPAARVHEPWLMSKEEQERSGCRIGVDYPAPI PASKHGRP  
HAGAGGGGGGGGRPASGRPASDRPASGRPGPRSGGGGGGGGARGAKRSEFERYN

>Tetrabaena\_soc\_PNH04446.1\_photo-lyas

MIRFLFQSLFRKMEKVVEVEKEDEDEPGSALLAAVKSCRESSVRWLVTAPATRTLPLGVVIRIELAATS DRI  
KELIRSHVTAPRHKEYRRNVMLLISSSAAGNEEEIERLLALPHFSLADIDVDSVSDALS AADRNGHVAIARRI  
SKGEFERYEATRDELFAETTRLSVYLKFGCVGVREVFRVAVQAHGVGHALIRQLFWRAF YDQVAYHFPVGLAG  
QVTPGKSNE SLNRKYDEIRWVSSQPLFDAWCAGRTGFP IVDAGMRQLLATGYMHNVRVMVSANFLVKVLHIDW  
RLGERFFAQNLVDYDPSSNSGGWQWASGGGADSQQYYRVFSPWLQAEHHDPGCVYIKRHIPELSTVPVADILA  
WHSAHVKHSTPYPPPIVADYRVEAKRSMAMYKKNLN

>Tetrabaena\_soc\_PNH07791.1\_cry-1

MPEFGTVIVWFRDLRVDDNPALVAALNAAENVIPVFIWAPEEEGQFQPGRC SRWWTKHSLIDLQQAALALGS  
KLVI RRSTDSTAALLQIVSEVGAEAVFFNHLYDPISLMRDHDCKRGLTAAGVAQRTFNGDMLYEPWEVLDDNK  
QPLSTFSDFWARGGGEELSGGEGAGEGGGGGGERRRRKRESGDGEDGDEDSPGGGHTPQGGGGDEDMASADLD  
SRSGSEDEGGRGAWGEAPGGGAVVMEEAREAEEMEGGAEAGGGEGQSHKRRRSFGAGPLA

>Tetrabaena\_soc\_PNH10276.1\_(6-4)DNA\_p

MASASAGAKVSIVWFRKGLRVHDNPALIEACRDAAHVYPIFQSSYKVTVNRYN FLLESRLDLDNSFRARGS  
RLLVLRGKPEEVLPRVFEWGAKQLCFEVDTEPYAKARDARVHQLAAEAGVEVHAAVSHTLYDTEMLVARHGG  
SPPLTMQSFTKLVDRVGDPPPPAPDPPAAIPPPAPGMPAADPAATGVPTWQEVGFTEAPVTIFKGGETEALRR  
LDASFADPKWVAGFQKPDTPNPAAFERPAATTVLSPY LKFGCL SARLFHARLLAVYREHKAHTQPPVSLRGQLLW  
REFFYTVGAHTPNFDRMVGNPICKQIPWDTNEEFYN AWREARTGEQLPAPDSGAGRTCKAREVVDHYINAANW  
MWLSASAFFSQYFRVYSPVTFGKKVYDPSGAFIRRF LPVLKDMPAKYIYEPWTAPLEVQRRAGCVVGVDYPRP  
ILDHAVVSKRNTARMAEAYRANKCVAGPGGVDELA

>Tetrahymena\_the\_XP\_001015321.1\_DNA\_photol

MDILNSKQFSENQKKQKVNLFWFRRDLRLFDNVGLYHALKESIPVVPLFIFDKDILNELEDKKDCRVEFIHNY  
LSQMQDNLRKHGSTMVVKHSNAESAFAKSLMEEFDISCVFTNRDYEPIYAKKRDQQIKEILNSKGIGFKDFKDQV  
IFEAKEVHQDDGSAFKVYTPFSKKWISLLSEPDYQSYKSESLMNNYKWSQVEVPFPTLEQIGFQKTGIEFPPS  
QLDEELVKNYDKTRDYPHIKTSLMSVHLRFGTVSIRELVRKAVLLNQKYLDELWCREFMMMDQFPLFATEN  
FKKAYNKVEWRNNPEEFKAWCEGKTGYPLLDAGMRQLNKTGYLPNKLRMIAASFLTKNLLIDWRWGERYFAQK  
LIDYDLAANVGGWQWVNGSGTDQAPYIRVLDPVMQQKKYDPDFKYVKTWVEDFNEDTYPKRIVNYEESRQRAL  
DAFSIVFKKNQIKQHQQQIKEKKANYQHYYKNKK

>Tetranychus\_urt\_XP\_015785840.1\_cry-1-like

MSKAFDNSPHGNKLELSMNDNGENDSKLVNSPQTTANEFTLLNNRTDCDLIDDDSIIEPCIQSFSSTSPQASIKF  
NAISNNTPASHKTVDCARDLASPDVNSTQCFQSPNQSSSKTPVQLKSEQSNSVLNNYVFKSNHNKDNHSDSV  
YNDNNGNETRGPAGHLVHWFRKGLRLHDQALLKGLQGCDTFRCIYLIDPWFSTESNCGINKWRFLQLSLEDL  
DSNLHKLGSRLFVIRGQPAEVFPLLFKEWMITHLSFEEDPEPFGKIRDAKIAKMCKEMNIEVICETSHTLYRL  
EDIINHCSGEIPLTYLQFQNVISELGKPEEPAQAITHIEVIGKAYTPVPRDHAKKYTVPTLNELGFTTQPNHRS  
VWVGGETEALQRLSRHLEHKAWVATFGKPKLTSLSLLCASQTGLGPYLRFGCISPRLLYHQLSNLYSKLKKGN  
PPLTLCGQLLWREFFYCVATNPNFDMQNNPLCVQIAWNSNAEALNKWANGQTGYPWIDAIQTQLRREGWIH  
QIAKHATVCFLTRGILWISWEEGMKVFDELLIDADWSVNAGTMMWLSCSSFFQRICHIYCPVSFGRKMPPQGD  
YIRRYLPVLRNIPNEYIHEPWKAPIKVQREANCKIGKHYPPQIVDHQEAMRINQERMKQVFRILIKGLDLKRE  
DVQD

>Tetranychus\_urt\_XP\_015787507.1\_photo-lyas

MGPKKRQLSPTPPKKKDKTDSSEDSSEEAGTTSASLDEVKSEQTADPSERLFQEINKARAAGVKSIEDFKFNKK  
RVRMLSDCKVASEDCGAILYWMSRDGRVEDNWALLYAQRALALKFKVPLHVCYCLVPVFLDASIRGFHFLGGL  
EEVEKDLLSRNIHFHLLLGAPPKVLPKFVSDNNIGGVVCDFAPLKVPMRWVNEVCKKLPEDEVPLCQVDAHNI  
PCWVASEKLEYAARTIRPKINNKLPFLTHFPVVLHPYSSDVKYEKVDWVRAEKSLECDRSVPDWNWIKPGY  
RAGIKMLSDFVEKKIRWYNDKRNPDPSQDVQSNLSPYFHFQGIAPQRAVLVVQKYKKQYKESVEAWVEEAVVR  
ELADNFCFYNNPYDSLKGAPEWAQKTLNDRKDKRPYVYTKKEFEDGKTHDPLWNACQMQLVRDAKLHGYSRM  
YWAKKILEWSKSPEEALEIAIYLNDKFELDGDPNGFVGCLWSVGGIHDQGWGERAIFGKIRYMNYEGCKRKF  
DINTFMAKYKTISSKINPWTASKKTKK

>Tetranychus\_urt\_XP\_025017376.1\_cry-1\_X1

MSSKPTFNCIHWFRHGLRLSDMPSLYQAAKVCQKIYPIFIFDGFAGLQAGFNTRYLLDCLADLDTQFKSF  
GGRLICFHGNCVQILESLIKKWSITHISFEQDPEPIWKERDDLKQLANSLGVEIEKISHTLWDPEKVIDMN  
GGEAPSNIYEMFCHTVNVIQGPDRPLPKPDTQLKTIFFPLDDYCEDTAGVPSSPLVLGVKMESEKQINQVWFGG  
ETISMELLADRLSLEKSAFKVG DYLPQTSTPDITITDKSLPALRHGCLSVRKFYWDLHDLYESIFGNSVKPR  
IVGQLIWREFFYTMSVNNPCYGMANNPVCLQIKWKQDSAALEAWSTGKTGYPFIDAAMRQLIFEGWIHHA  
NAVACFLTRGDLWLSWEHGLKVFLKYLIDADWSVCAGNWMWVSSAFDTILQSDACISPIMYGRWLEPTGNYI  
RKYPVELTKMPTKYIFNPSSAPIEVQKEANCIIGVDYPEPIINHDAFAKTNQKLMESVKNVFLDHRYQSMSNF  
KHIPNHVAPSNIEETKAFLCLPEDFFNNLVI

>Tetraodon\_nigr\_\_CAF92156.1

MKDCELSAPSQERQLRQPGGGQTGSGCVGPTSVSQTPRRGQICSAGADSREGNNSPEESGDLVTEVGALDPSG  
KPKRSKKRRRRRQAGARQVVGLPAPSAAPVLLWFRRDLRLCDNPALTAALVAGAPVPIPIFIWSPEEEEGPA  
GVTVATGGACKYWLHQALSCLCASLERNGSHLVFLRSAEAGGEGSSLOTLKELVKETGARTVMANALYEPWL  
KDRDHAAVALWKSQVECKMFHSYCLRDPYSVRTEGVGLRGIGSVSHFLSCCRQNP GPALGAPLEPPTALPVP  
AHWPRGAPLEALGLARMPRRKDGTVDWAASIRKSWDFSEEGA HARLEAFLGDGVYRYDKESGRADAPNTSCV  
SPYLHFGQLSPRWVLWDAKAARCRPPKFQKRLAWRDLAYWQLSLFPELPWESLRPPYKALRWSSDRRHKLAWQ  
RGGTGYPLVDAAMRQLWLTGWMNNYMRHVVASFLIAYLHLPWQEGYRWFQVRNRCRGDTGQDTLVDADVAIDA  
MMWQNGGMCGLDHNFMVHPVDAAMTCDPDGSYVRKWCPELSGLPDELIHKPWKCPASVLRAGVVLGQTYPE  
RIVTDLEERRSRSLRDVALVRKQFGQYVDERSGCDLLPLPRLVSEALGSSPQGGVEAAGGRPFLPLITRME  
FKHQQGD PDADAASNPNYNAVLRKGYVSRKRDEAVAFLHERDFTASVMQEGARRRERMESDQRRLEGLPRASEPR  
GRARRTPAKDRFSVPPGAVTPAR

>Tetraodon\_nigr\_\_CAF93038.1

MVVNSVHWFRKGLRLHDNPALQEALSGADSLRCVYVLDPWFFAGAANVGINRWRFLLEALEDLDCSLKKLNSRL  
FVVRGQPTDVFPRLLKVGAGPVRSLVFQSADRAGAMIRASCRCLISVCVPQEWKVTRLTTFEYDPEPYGKERD  
GAIKMAQQFGVETIVRNSHTLYNLDRIEMNNNSPPLTFKRFQTIIVSRLELPRRPLPSVTQQQMDKCGTPVA  
DNHDQLYSIPSLEELAPVCPRVSRVQDGRVSSGGLAWRRVGSAGEAPQTSGKEGVGVPPGALAGQHLFPVRQP  
GRPQPLPALRLPVLPGVLLQPPGALHQGRTPSALGGRLDEPLSPCPPVPPVSPSCVKAAPRCPCLDSCCGGS  
SSTRRPPTTPTLTAWRATPSVSRWVSTPVAGSQGRRPLGHPQGRVLGTPLVLGGGAAALGGRPWSGDLVVL  
PLTLRRTPVCPGLQIPWDQNPEALAKWAEGRTGFPWIDAIMTQLRQEGWIHHQARRASACFLTRGDLWISWEC  
GMKVGPPWSRRRRRLSARLLPQVFEELLLDADWSVNAGSWMWLSCSAFFQQQFFKCYCPVGFGRRTDPSGDY  
IRRYIPILKDYPNRYIYEPWNAPEAVQKAANCVVGDYPRPMINHAEGSRLNIERMKQVYQQLSHYRGLSLLA  
SVPTI

MPAKRRQATPAAKEPVGKQRKLAPTEEEKKTKAGGWLEEEVKQRTQNKEMGFITKRLRFISDTEEMRQGSEG  
VLYWMLRDHRVQDNWALI HARRLALEEKVPLHVCVCLHVPKSQLSTLRHYSFLLKGLEEVAAECKALGIQFHL  
LRGPAGDLLPGFVSEQQLGAVVTDFSPLREPLTWLEDVKKKLPKDVPLIQVDAHNI VPCWVASPKLEYAARTI  
RGKITKQLPEFLTDFPLVEKHPHAATR TAKPVDWRELLSSLGVDRTVGETEWARPGAAAGLAMLESFIDVRLK  
RFDSQRNDPNAAALSQLSPWIRFGHVS AQRVALQVQRGGRKLG VGVSSFIEELVVRRELTDNFCFYNEKYDSV  
EGAYEWARKTLKDHA KDKRPYIYTREQLEKAETHDKLWNAQV VREGKMHGFLRMYWAKKILEWTPSPPEEALA  
SALYLNDRYELDGODPNGFVGCMWSICGIHDOGWAERP VFGKIRYMNYKGCLRKFDVAAAFERKYGPPASA

MG TGEATADGTTTISEKNLRFL LQCLELD DANLRK LNSRLF VIRGPANVFPRLFK EWKISRLTFEYDSEPF G  
KERDAAIKKLAK EAGVEVIVKISHTLYDLDKIIELNGGQPPLTYKRFQTLISRM DPPPEMPVEMLSGNLMGR CV  
TPISEDHGEKFGVPSLEELGFDIEGLPSAVWP GGETEALTRIERHLERKAWVANFERPRMNANSLLASPTGLS  
PYLRFGCLSCRLFYFKLTDLYRKVKKNTSPPLSLYGQLLWREFFYTAATNNPRFDKMEGNPICVRI PWDRNME  
ALAKWAEAKTGFPWIDAIMTQLRQEGWIHHLARHAVACFLTRGDLWISWEEGMKVFEELLLDADWSVNAGSWM  
WLSCSSFFQQFFHCYCPVGFGRRTDPNGDFISRLLASSSDGGRSPSVRL LPRPALSTPSISDSQRCIVLPPT  
VSAP SSTPSSDGKVGPGGVGLLASVPSTNGNGNGMMAYS PGEQPPGTNSNANSNLLGASGGTVATGNGSGSI  
LLNFDNEEPTRSNSAGQQPLRQPPQQHWWDS SCTPEDS QEKGS ENQNGTVLGRRTVWRAHSTRCRGKAQRSGS  
SSSLSEKYSHLGYLANMLTPHW

[illegible]

MRLFD<sup>1</sup>AWKEGKT<sup>2</sup>GV<sup>3</sup>PF<sup>4</sup>VDANMRELATTG<sup>5</sup>FMSNRGRQNVASFLTKDLGLDWRMGA<sup>6</sup>EWFESLLVDH<sup>7</sup>DVCSNYGNW  
LYSAGIGNDPREN<sup>8</sup>RKF<sup>9</sup>NMIKQGLDYDSN<sup>10</sup>SGAGPS<sup>11</sup>PRGRK<sup>12</sup>GPSHTPKOHRDRGIDFY<sup>13</sup>FSRSKNL

MSPRQAMTPPCLLAELAAAPATKREIRIAVLLTSTPFYRAASAGRRLNRAAPVLAAAAATRTSFVGGHARGQLGT  
AVRRATTTTKPKSTREMTKKRAAQKSGDGGEAPTIAHAPDEVI PAGFDQTRTKLLTQTVMPREKKTDMENPC  
IVYWMRDCRTVDNHALLFAQGLATKYQVPLRVVFTLPPPPSSAPGEGADGSPPKPEDMSLTRHGDFFLLDGL  
KVVAEELEAANVPLDVLQPACRTAVGTETIRYCINRNDALALVCDMSPLRQPRDWIETQTVPHLGQQVPVYQV  
DAHNIVPVWRASPKREVGAARTLRPKINN VFAYCTQFAEFAGNAHLAAEKVDAENQHDWEQYRRYLRLDESIE  
PVVGYVAGHEAAMERFREFCSTKLKNFDSMRNDPNQDVCSNLSPWINHGQVSFQRLALEVRALKKHTNGTAAY  
IEEGVVRRELSDNFVYYTPSSYDSLEGAADWARDLSLOLHSTDKREYVYTWKVLETGMTHDDLWNAAOLQLVRE

GKMHGFLRMYWAKKVLEWTVSPAYALATAQYFNDRYALDGNPNNGFVGVGWSIMGIHDMGWKERDVFVGKIRFM  
NYAGCRRKFKVDTFVARYGAKENANKVAPAGEKVAGKKRKS  
>Thalassiosira\_oce\_EJK57807.1\_THAOC\_2211  
MGKQHAVENARPVNIHWFRQTDLRLHDNPALRRSVDLSLGKSKNPVVGAAVSESPPHRGNILPVFVFDTSRIY  
GSNTRSELGSLKCSARRAQFVLQAVSDLRNLEKRGSLIIGVGKPEDVIAELAKGVLTSQSSNGAKLNIVCQE  
EVCSEELATEKAMRSKLARAMNKGSKFDFETVWGGTMYDPETLPFDGGVNGIPDTFTPFPRNKVEKACAIGNPL  
PVPSDEELAMPKDAHTIVKESKCHASLDYMP TLADLQYSKEDIEEAELVDIRSALPAGYRGGETFALARVKDY  
IWDRLDLKGYFDTRNGMIGSDYSTKFAPWLALGNVSPRYIARECRRYEETRVANKSTYWVVFELLWRDYFKMF  
AKKHGASIFMIDGTIGKRDHANKRKWGNDRPHIKAWKDGMTGYPLVDANMRELKATGFQSNRGRQNVCSFLT  
DLNMDWRYGADYFEETLIDYDVHSNWGNWASGSGMTGGRLNRFNIVKQSKDYDYGGDYVRLWCPELEGVPDKY  
VHEPWKMSDAMMEACGVKIGPGRDYPAPIVDPTVQPRIMSRGSSNGGRGRGRGKQGGRGQGRGNGLRRENNNSN  
RSKSQRKDMKSLKEGSYTFRP  
>Thalassiosira\_oce\_EJK58052.1\_THAOC\_2184  
MDGQATLLKDFVAEMNHLGKQNEVLIVSGSAGAKARFNSVSALQRLRDDRVEVGPKISVAYNPFFPEEQDLADE  
RRRLEQKLETGLVSKVYLQFGTDLRLRSSLQELKAMQAQAEHNFIDICGSIFLPTKKLIAQQKFRPWNGVFLS  
DEFLAGETTARGIVLQMMKLYEEHGCIEILIEAPGVRTSNDWSVVESLLKERDDKIAASGANVKPEKQRSNAAA  
KDASPAKKRKATEVAADTSSEPAASGIGIPKSTLTPOQLAKPAIVLFHSHDCRLHDNVALQLASHHACVIPLEF  
IWSRKEQGRWGVGRCMEVILKDALRNLDKELRSHGLELTCRQGDDSSSEVLRQLCEECS SAVYINVEHTPESG  
VREAKYRRLLEIDVETVEQCSSLLYDPTSPQLGTGFHGGHWGTLMPFLKGCKKQLGEPRKPVQRFETFAMLE  
AMAGPVTWPSSSSIDGLDLAVIEGEERLLERFPMSEDAAHSNLEQFFKVGFGRYESDRSRADMEWSTSKLSAH  
LRVGTLSPNVLYYKTEASELDYPQRKTFSRRLFWRDLAYFHLQSFPGMRWESIRLHYGQTEWCNGEEGDRRFL  
AWKRKGTGFPLVDAGMRELYKTGWMTQSIRMVVASFLTEYLVDWRMGAEWFHYTLADADSAINPMWQNAAGR  
SGIDQWNFMSPVAASQDASGEYTRRWPELAKLPRGTLHKPWETPAQVLNECGIVLGRDYPHRIVTDLKAER  
ALSDEAVLEMRRKNQQFNENERGYDLVQLPNGKETVVFTHKKQFRIDRQGIVLKETKKTGSGAAGRGRGQRAR  
KKAGRDKVAGKR  
>Thalassiosira\_oce\_EJK58421.1\_THAOC\_2145  
MSAKSGENVAMHWRKGLRLHDNPALLHALSLTKNGGSIFFVYVDPNSYQLLKCSVNRARFLECCQDLDES  
LKRCGSRLYVATGDPVEVLPEMWWKFGVTHMTHESEDETGEPYALQRDTAAVAKDAGVEVIDFTSETLRPLG  
NREGGYVANC GGDASSVPATMTSFQKLFSRIDKGNIEPLDAPKKEDFPI SADEYENDYLT LKHPCDIPWPRG  
QNRSQIGPIWNRADANKVTSHIANGGESYALDRLQKTITARPWNWTAQYKPKTSCTEVSDPSTTVLSPYLSIG  
CISPRTVWHAIETANKQAKTNRTPPVSLHGLLRWDFNNLMAHSANSQHAGSWGQIKNNAFCRDI PWSSDPN  
MLSSWKEGRTGYPWIDACMAQLRSEGWIHHLGRHAVACFLTRGDLWQSWVEGADHFEAELL DADYALNSFNWM  
WLSASGFFYQYFRYCSPIQFQKKNDPNGNYIRKWVPELAEMPAKHIYEPWKANVSILKTAGVKLGKTYPRPIV  
DHAVVSKENMSKMKLAYDLHKKSQGGGKKPASTSGTEPPKKKAKKVKKQTKLK  
>Thalassocalyce\_inc\_AQX17842.1\_putative\_p  
MTGHATIHWRKGLRLHDNAALLASIESTSTLIPLYILDTHCLDPQKVGANRMGFLLATLKS LDDDLREKGSK  
LFVAKGRPVEVIDALVQELNVQKLTFERDTEPYNKDVDKEIMKKMKS LCVHECWGHTLFNPDHLLSLNGGK  
SPLNMTGFLNLVSKASTPPAPMEAPTSIPAPPNELKSETIEVLQSLPKLSDLQCYGYNPAEETTWFPGEKEA  
IGRMEQFLAQKKRVAGFEKPKTDPTSLVPD TTALSPYLSGSLSVRLFYSRLKETLSSTSSTKPPVSLEGQIY  
WRELAYLIGYSTPNFGQMVGNPVCMQIPWYTG DNAKEFLKKEEGLTGYP AVDAAMNQLRTEGWMHHLARHLV  
ACFLTRGDLWVSWELGRDVF EKYLLDADWSINNF SSWHLSCSAFFHAYFRCYGPTTFFKKT DKN GAYIRKYVP  
LLKKFPDEFIYEPWLASKATQQAAGCII GEDYPKPIVDHKVVNKQNM EKMKLAYANNKKKSGDEPPAKKKK  
>Thalassophryne\_amaz\_\_XP\_034018857.1  
MNVNTIHWFRKGLRLHDNP SLKESLLGADTVRCVYILDPWFAGSSSVGINRWRFLQLSLEDL DSSLRKLNSRL  
FVIRGQPTDVFPRLFKEWKITRLSYEYDSEPF GKERDAAIKKLASEAGVEVTVRISHTLYDLDKIIELNQGS  
PLTYKRFQTLISRMEAVAVPAEPITAEVMGKCTTPLSEDHDDKFGVPSLEELGFDTEGLTS AVWPGGETEALT  
RLERHLERKAWVANFERPRMNANSLASPTGLSPYLRFGCLSCRVFYFKLS DLYRKLKKNSSPPLSLYGQLLW  
REFFYTTATNNPCFDKMESNPICVQIPWDRNPEALAKWAEKSGYPWIDAIMTQLRQEGWIHHLARHAVACFL  
TRGDLWISWEEGMKVFEELLLDADWSVNAGSWMWLS CSSFFQQFFHCYCPVGFGRRTDPNGDYIRRYLPILRG  
FPARYIYDPWNAPDSVQKAAKCIIGVHYPKPMVNHA EASRLNIERMKQIYQQLSCYRGLG LLETVP SNFSGNG  
NGDTS DRMGLSAHDAAAPSGYQTPVQAQSGAMMFLQGEPPSHSHQQGS PGTSMMCYSKGVQQVARPALQKAAE  
LATSQTSCKRHSD DSTNGTSSKVQRQSH  
>Thalassophryne\_amaz\_\_XP\_034021099.1  
MVYYQLRRLICFKGLKDIHLSSRGLQFFSQADVDIVDCPTWTAMPRPQTKRQKTSNYSAAKAVDKTKLVQRR  
DEDFLSVIEQKRLTTAPSIVSFNFQMKRVRVLSCEEFLDEHSGVLYWMSRDQRVQDNWALLFAQKLALRMAT  
PLHVCFCFLVPRFLEATIRHYGFMLKGLQEVEQQECQKLDISFHLLMGYAQDVLPRFIMDCGIGGVVTD FCPRL  
PTQWVSDMRDELPE DVPFFQVDAHNVP CWEASSKLEYGARTIRKKITDQLSTYLTEFPPIQHPPHPSKTKPQ  
PIDWQSVHASLEVDRSVGEVDWATPGTTGGLRNLESFIKYRLKS FSTSRSDPNKSALS NMSPWYHFGQVSVQR  
AMLQVKELSGKYSDSVAAYIEEGII RRELADNFCYNDNYDNVGGAWEWARKTLDEHRKDQREYVYTRVQLEE

AQTHDHLWNAAQIQMVREGKMHGFLRMYWAKKILEWTESPEQALEFAIYLNDRYQLDGRDPNGYVGCWWSICG  
IHDQGWAERAI FGKIRYMNYNGCKRKFDVPAFVEKCEVAPGLNTTGKK  
>Thamnophis\_sirt\_\_XP\_013909206.1  
MGVNSVHWFRKGLRLHDNPALREVIEGADTVRCVYILD PWFAGSSNVGINRWRFLLQCLEDLDANLRKLNSRL  
FVIRGQPADVFPRLFKAWNISKLSIEYDSEPF GKERDAAIKKLAIEAGLEVIVRISHTLYDLDKI IELNGGQP  
PLTYKRFQTLISRMEPLEMPVETITAEVMSKCATPVSDDHDEKYGVPSLEELGFDTDGLPSAVWPGGETEALT  
RLERHLERKAWVANFERPRMNANSLASPTGLSPYLRFGLSCRLFYFKLTDLYKKVKKNSSPPLSLYGQLLW  
REFFYTAATSNPRFDKMEGNPICVQIPWDKNPEALAKWAEGR TGFPWIDAIMTQLRQEGWIHHLARHAVACFL  
TRGDLWISWEEGMKVFEELLLDADWSVNAGSMMWLSCSSFFQQFFHCYCPVGFGRRTDPNGDYIRRYLPILRG  
FPAKYIYDPWNAPEGVQKAAKCIIGVNYPKPMVNHA EASRLNIERMKQIYQQLSRYRGLGLLASVPSNGNGNG  
NGNGGLMGYSSNENLSGCVGTNGTQMG TSEGHTGNVQSC THGETHKGKSGIHQQGYAQGNSGILHYAHGDSKK  
THLGQQGR TSLNNGLCTGKRPNPEERI QSIGPKVQRQSSN  
>Thamnophis\_sirt\_\_XP\_013913565.1  
MSPKKRKP GPATSTSDSSEGGRKPDDGGTEAFAAKKKLKLDDSR TQSLAESVKEARLSAGASVVEFPYNKRRV  
RLISPAPDLKEGARGILYWMSRDQRVQDNWAFLYAQRLAL KQRLPLHVCFC LVPKFLDATIRHFGFMLRGLLEE  
VAEECQLLDIPFHLLVGFAKDTLPRFVTQHVIGGVVTD FSPLRVPMQWVRDIQERLPSDVPLAQVDAHNIVPC  
WVASEKQEYGARTIRRKIHDQLPKFLTEFPVVKHPFPAGRPAEPINWEACYSSLEVDRSVKEVEWATPGSSF  
GLKVLEEFVKDR LKSFGSDRNNPNRPALSNLSPWFHFGQVAVQRAILEVRKHRARYKESVEGFIEEAVVRREL  
ADNFCFYNP NYDKVEGAYDWAKTTLKLHAKDKRSHLQQASDLGPLPPAVGYSQHPLI  
>Thamnophis\_sirt\_\_XP\_013915839.1  
GAAAAARPKDR TQGSSHRRRSHLRKGKLDSPATPRHLSRSTSSPGASSAVGINRWRFLLQSLEDLDNSLRKLN  
SRLFVVRGQPTDVFPR LFKEWGVTHLTFEYDSEPF GKERDAAIVKLAKEAGVEVTTENSHTLYDLDR I IELNG  
HKPPLTYKRFQAIISRMDLPKKPVSTITSQMEMCKTEIQENHDETYGVPSLEELGFPT EGLAPAVWQGGETE  
ALTRLDKHLERKAWVANYERPRMNANSLASPTGLSPYLRFGLSCRLFYRLWELYKKVKQNNSPPLSLYGQ  
LLWREFFYTAATNNPKFDRMEGNPICIQIPWDRNPEALAKWAEGKTGFPWIDAIMTQLRQEGWIHHLARHAVA  
CFLTRGDLWISWESGVRVFD ELLLDADFSVNAGSMMWLSCSAFFQQFFHCYCPVGFGRRTDPSGDYIRRYLPQ  
LKGFP SRYIYEPWNAPDSVQKAAKCIIGVDY PKPMVNHAETSR LNIERMKQIYQQLSRYRGLCLLASVPSCIE  
DFSNIITDLSAHGSCSNTILRQSQCTSPKRKCYTGEENSEELHKRARMMIHQGSKNSQQELLQTEFGN  
>Thecamonas\_tra\_XP\_013752806.1\_cry\_DASH  
MAAARATAGRTAVCWLRNDLRVADSATMDHVANTCYDAAVFVYCFHPRTYTESWMGLPRTSGHRARFLLD TLS  
DLRSALRGLGSDLVVRHGLPAEVIAGLVDELAADV VVYHQAVGSEEADDEAALAAALPDAVTVKSFWGRTLHH  
RDDLPFALADLPPTFTFPFRKALERAHSVPREIIPRPTSLPPLPAVEPGKLPSLTDGLERPPADSRVHGFP  
GGESGAWARIAEWMWDGDALRRYKETRNGMLGGEYSSKLS PWLALGCISPRQVASEVRRYEAE RVANKSTYWL  
IFELLFADYFTFYAARAGRSLFAARGPADVSNAAWDGS DAAFAAWAAGTTGIP LVDANMRELLATGYMSNRGR  
QIVASVLTKNMRVDWRRGAAWFEAQ LIDHDVALNYGNWAYVAGVGADPRPD RYFNVAKQAATYDPDGAYQATW  
LPPADRAAPSPATPIIDLAATYPSARNHPAARRSAPRKGRGRARGRYGRKLQKPNKRTVKRATQRAAQLSD  
>Thecamonas\_tra\_XP\_013754232.1\_cry\_photor  
MAARMGSRQVAMVWFRKALRVDDNPALAAAADAAA VVPVFVLDPHLLTRAYVGDTRLVFLLESLLALDSSLR  
ALGSQLLVIKGTPEKGALDTLQALWREVGADSLHFEADYEPYAKIRDAKATRMAADDKLAVETSEPNLIYPME  
VWESVPDAALPTTFGGMRKLI AKRGWQPQAPIEAPTEL PPLPQA AVDAVAKDTERFAVPGMAAFPGRSEGDGS  
SRAFPGGEAEAEQERMRAFLADVDRVVTFEKPKTNPF AEPPSTTGLSAHLKFGT LSVRRFYEQLRAVEEKS KRS  
VSQPPVSLVGQVLWREFYTVVGSRTPGYEAMATNPLSRIIPWDDEPDKVAAWAEGRTGFP LIDAVMRQLRATG  
WVHHLARHLVACFLTRGYLWQSWEAGAGVFNSLLLDADHYLNIGNWLWLSASAFFHQYWRVYSPI SFGNKYGA  
SAHAYVRRWVPELARLPDKHLMAPFDAPEDVLADAGVVLGRDYPEPIVDHAAAKTANLTKMKAAYA AKRRGDP  
SAAAGGNDAGSSAAVGSKR RVSGAE GEPAGKRAKA  
>Thecamonas\_tra\_XP\_013762098.1\_photolyase  
MQASVRPTTDNFALVYALRRAAALRLPLV VAFALTASFPGANARSYSFLLEGVLDAFAGLADAGIGGC VLLPA  
DGEAADASMPARVAELAAALASPEVVT DAGYLHIQE QWRTELA AELDDAGVPLVQVEANVVVPVEVVT DKVEY  
AARTIRPKINRLRDDYLVPLDDDDASDHGLSLVARPGGAPASTQLPDGVADALGELKLSRAVPADELPREVEN  
KAGQAWIAERVEAINADVSVAPVAGKHGGWRAGRDAVDAFVDGKLRQYAAERNVPSQGSTSGLSAYLHYGHIG  
PVSVARRVVAAKKASSSTTRESADAFLEEMVVRRELSMNFCHFMEGESYAKYETAHEGDARQWIYTADELDA  
GLTHDPFWNAAQREMVLYGDMHGYARMYWSKKVIEWTESPKAAYAWLRAANDKYELDGRDPNGYVGVAWCFGR  
HDRPWTRRDIFGSVRYMNDKGLLRKFKDGIRQWAADINAA YEAKHN LAPGVDAWQYNPNKRPPAGNAGPSAKK  
QKKK  
>Thelazia\_cal\_VDN01580.1\_unnamed\_pr  
MVSSRIQPLNKQNI AVGKYVLL LARCIRSEQSPSFSYASQK GNEHGVPIVITYIYESHRHNVAQRKFLL EGLK  
CLESNL AHLHTPLLVIKTANDKEAMEIILRLCDAACEVVTDAAYLREDRCFQEKLSDELVT KCRKITKVEGNV  
AVPVTALLNGPAYNAQSIRKV VWHFVDDLLLEKWD DIPKI HCKSLESVLNWDLECLNISKELDKAANECKTNT  
KLEGGEIAARRVLNNFIVKKLSAYEKERNIPNSNKQSLLSPYLHFGMISPIAIIAEVMKSSAPKSAKDAFLEE  
LVVRREL SHNFVYYRDTYDTDFDCLPDWAKKTMDEHQ RDKREYIINYKELEEGRTHDVFWNAAQFELVFAHKM

SGYL RMYWAKK VIEWSADYKTAYSFLIEQNDKYELDGRDPNGFCGVMWNFGMHDR AHAERP VFGKL RYMCADG  
LRRKF KKYIDEYVR VNYKLAGRKLEIGESQPKKRNSLKD FDFKVKKVRKS  
>Thelohanel lus\_kit\_KII71670.1\_photolyase  
MIFSQR LALKYEIPLVVVFCLSKSYMRYSRRHFD FMI RGLDSVSTSLKALKI PMHVLLGDPTPNILKFVKNNN  
VSAVIADFLPLDPYKSWLEDLKQEIPEDVSLCQVDAHNIVPAWIASPKREYAARTIRPKIHQHLDEF LTFEFPF  
IIPHEPNKSLSFDPFEISKYIKFVEDAADVKPITWAVPGPDQGLLELEK FVSERLGT FADTRNDAANDLTSNL  
SPWFHFHGLSTQRTILRAIEFKNKYKKHVEIFIEEAVVRRELS ENYCYYTEEPES PSSAPNWAVQTLKKHLKD  
ERP YVYTLEELENAETHDHIWNAAQKQLTGKGKMSNYLRMYWAKKILEWSADPETALKNSLI LNDKYSIDGND  
CNGVVGCMWAVYGLHDRPWRRERPIFGIVRYMSEVGCNRHFNIEEYVEKHIKAE  
>Thinocorus\_orbi\_\_NXP02623.1  
MSHRTIHLFRKGLRLHDNPTLVAALESSEVLYPLYILDRKFMTSVMHIGALRWHFLLQSLEDLQKNLSQLGSC  
LLVAQGEYEAVLRDHVQKWNITQVTLDAEMEPFYKEMEAKIRRLGEELGF EVLSLVGHSLYDTR IILDNLNGGT  
PPLTYKRFLHILSL LGDPEVPVRNLTAEDFQRCQPPDPGLAETYGVPLPVDLKLPPENLSPWRGGETEGLQRL  
ERHLTDQGWVASFTKPR TIPNSLLPSTTGLSPYFSLGCLSVRTFFYRLSNIYAQAKHHS LPPVSLQGQLLWRE  
FFYTVASATPNFTQMAGNPICLQIRWYEDAERLHKWKTAQTGF PWIDAIMTQLRQEGWIHHLARHAVACFLTR  
GDLWISWEEGMKVFEELLLDADYSINAGNWMWLSASAFFHQYTRIFCPVRFRRTDPEGHYIRKYL PVLKNFP  
SKYIYEPWTASEEEQQQAGCIIGRDYPFPMVNHKEASDHN LQLMKQVREEQPRTAQLTRDDTDDPMEMKV KRD  
HSEETIPKGKVAR  
>Thinocorus\_orbi\_\_NXP02785.1  
MQHSSIHWFRKGLRLHDNPALLAIPDCCRLHPLFILD PSSSRAGPNAQRFLLDALRDL DGS LREIGSRLLV  
RGCPEEVFPRLFHAWGTTRLTFEVDTEPLARQRTAVAKLAAQH GVEVIQKVSH TLYDTERVLALNDGQAPLT  
YKRLQNLLASLGPP EKPAPVLTREHLQGCCTPCQVSD DIDYGIPTLEDLGQDPTKLGPLY PGGETAALARLN  
AHMERTAWVRSFKK PETEPNSLNPSTTVLSPYLKLGCLSVRTFWWRLDEV CQGREHSQPPVSLHGQLLWREFF  
YTAGASIPNFD RMVGNPVCLQVDWDDNPQHLQAWREGQTGYPFIDAIMTQLRSEGWIHHLARHAVACFLTRGD  
LWLSWEEGLKVFEELLLDADWSLNAGNWLWLSGSAFFHRYFHVYSPVAFGKKTDRDGAYIRKYL P ILKGFTQ  
YIYEPWKAPRAVQE QAGCLVGTHYPRPIVEHCGASKRNMGRMKAARAQK  
>Thinocorus\_orbi\_\_NXP07809.1  
RFL LQCLEDL DANLRKLN SRLFVIRGQPADVF PRLFKEWNI AKLSIEYDSEPF GKERDAAIKKLASEAGVEVI  
VRISHTLYDLDKI IELNGGQPPLTYKR FQTLISRM EPLEMPVETITPEVMKKCTTPVSDDHDEKYGVPSLEEL  
GFDTDGLPSAVWPGGETEALTRLERHLERKAWVANFERPRMNAN SLLASPTGLSPYLRFGCLSCRLFYFKLTD  
LYKKVKKNSSPPLSLYGQLLWREFFYTAATNNPRFDKMEGNPICVQIPWDKNPEALAKWAEGRTGF PWIDAIM  
TQLRQEGWIHHLARHAVACFLTRGDLWISWEEGMKVFEELLLDADWSVNAGSWMWLS CSSFFQQFFHCYCPVG  
FGRRTDPNGDYIRRYLPVLRGFP AKYIYDPWNA PESVQKAAKCIIGVNYPKPMVNHAEASRLNIERMKQIYQQ  
LSRYRGLGLLATVP SNPNNGNGGLMGYS PGESISGCGSTGGHLFPTSPGAQLGTGDGHTV VQPCALGDSHTG  
ASGIQQQGYCQASSILHYAHGDNQQSHLLQAGRTTLGTGISAGKRPNPEEETQSVGPKVQRQSTN  
>Thinocorus\_orbi\_\_NXP08128.1  
RFL LQSLLEDL DNSLRKLN SRLFVVRGQPTDVFPRLFKEWGVTRLT FEYDSEPF GKERDAAI IKLAKEAGVEVV  
IENSHTLYDL DRI IELNGHKPPLTYKR FQAIISRMELPKKPVSTIMSQQMETCKVDIQENHDDMYGVPSLEEL  
GFPTDGLAPAVWQGETEALARLDKHLERKAWVAN YERPRMNAN SLLASPTGLSPYLRFGCLSCRLFYRLWE  
LYKKVKRNSTPPLSLYGQLLWREFFYTAATNNPKFDRMEGNPICIQIPWDRNPEALAKWAEGKTGF PWIDAIM  
TQLRQEGWIHHLARHAVACFLTRGDLWISWESGVRV FDEL LLDADFSVNAGSWMWLS CSAFFQQFFHCYCPVG  
FGRRTDP SGDYVKRYLPKLKGFP SRYIYEPWNA PESVQKAAKCIIGVDY PKPMVNHAE TSRLNIERMKQIYQQ  
LSRYRGLCLLASVPSCVEDLSGPVADSASGQGCSTSTAMRLS QADQASPKRKHEGAE EPCTEELYKRAKV TGL  
PAPEIPGKSL  
>Thinocorus\_orbi\_\_NXP08178.1  
DNWAFLYAQR LALKQELPLHVCFLVPKFLDATIRHYGFMLKGLQEVAKECAELNIPFHLLLG YAKDVLPAFV  
VEHDVGG LVTD FCLRLPRQWVEDVRERLPEDVPFAQVDAHNIVPCWVASPKQEYSARTIRGKIHAQLPEFLT  
EFPPVICHYP PSCPTEPIAWEACYSSLQVDCTVKEVEWATPGTAAGLAVLQSFIAERLKSFGSHRNDPNKAA  
LSNLSPWFHFGQVSTQRAILEVQKHRGKYKESVDAFVEEAVVRRELAENFCY YNENYDSVQ GAYDWAQTTLKL  
HAKDKRPFLYK LQLELEQGTTHDPLWNA AQLQMVREGKMHGFLRMYWAKKILEWTRSPEEALQFAIYLNDRYEL  
DGRDPNGYVGCLWSICPGWA  
>Thinocorus\_orbi\_\_NXP10417.1  
KVDYDVCSNYGNWLYSAGIGNDPRDNRRFNMIKQGLDYDGN GDYVRLWIPELQGIKGADIHTPWALNCAALSQ  
AGVTLGETY PQPVVTAPEWSRHINQRPQGQSPHPRGRRGPAHMPRQHRDRGIDFYFSRKDA  
>Thrips\_pal\_XP\_034230704.1\_cry-2\_X1  
MSKATAIHWFRKGLRLHDNPALIAAIKAEVELRPIFIFDPWYEENVR CGANRWRFLHQSLSDLDKNLRQLGTR  
LFVFRGKPEEVL PMLFNEWKVQRLTFEIDIEPYSRQRDDQVTRIAHQLDVEVIQKVSH TLYNTELVLKANMDA  
VPLTYVKAVSLMKS LGEPQAVPAPTKLPPECRAAAALLEDHKYDIPTLEELGVDQS QLGPCLPFGGETEGLA  
RLEKCLERKDWICSFEKPKTIPNSLAPSTTVLSPYIRFGCVSSRFVYHKINMVLKGRKHSQPPVSLIGQMYWR  
EFYYIAASGTPNF DKMVG NKVCCKVPWDENPEWVERWAQGKTGYPFIDACMRQLRQEGWIHHLARHAVACFLT

RGDLYQSWEEGQKVFEELLLDADWALNAGNWMWMSASAFYHTFYRVYSPVAFGKKTDKTGEYIRKYVPEVSKL  
PSNYLYEPWEASLSVQKAAKCVVGEDYPHRLVKHEDVYKVNIGRLSAAYKANKILQKEQDEADDDCPHPPAKK  
RKGK GK

>Thrips\_pal\_XP\_034231046.1\_photolyase

MSSKMSSSKEPPKKVKTEEASSPTTSKSDTNLKQRLVQDRKETAPSILEFKFNKKVRILSEATDVSENCKG  
IAYWMFRDERVQDNWAFLEAQRALALKNKVPLHVCFLLTKFLDGTIRQFKFLLKGLREVRKECEELNIEFHML  
YGSAGVMPDFIKKNKIGALVIDFMPLRNVNMNYADQLKKTLPKDVPLCQVDAHNIIVPCWQASEKLEYGARTIR  
PKIHKQLPEYLTQFPPIKHPYSGSLKADKIDWEKCEAHLEVDRTVDEVQWAVPGYSGGISTLESFINKRLKI  
FGSKRNDPTLDALSNI SPWLHFGQVSAQRCILVVKALRSKHPEVSDAYIEEAIVRRELSDNFCFYNPKYDSIE  
GTNEWAKKTLNDHKDKRPYLYSREELQNSKTHDDLWNSAQIQLVKEGKMHGFLRMWAKKILEWTESPEQAL  
SDAIYLNDRYSLDGRDPSGYVGCWMSVCGIHDQGWGERDVFVKIRYMNYQGCKRKFDIAAFVSRYGGKVYTKS  
SSTLDKFVSKGKKK

>Thrips\_pal\_XP\_034239242.1\_cry-1-like

MSSSEPESEPSAAASATPTPTATPSATSTATPSATPSATPSATPSATPSATPAAQSATSVSKSALPAPA  
PGGCAPSLAGNQGNQAHSMTPVMAVPALSRQKHSVHWFRKGLRLHDNPSLREGLRGATTLCRVFILDWPFAGS  
SNVGINKWRFLQLCLEDLDRSLRKFNLSRLFVIRGQPADALPKLFKEWGTTLNLTFEEDPEPFGRVRDQNMIMC  
KELSI SVSMVSHTLYELQKII EKNGGKPLTYHQFQNVVASMDLPPQAKPTITASNMQNCFTPIADDDHDDKY  
GVPTLEELGFDTEGLKPAVWIGGETEALARLEHHLERKAWVASFGRPKMTPQSLLPSQTGLSPYLRFGCLSTR  
LFYYQLTDLYKKIKKAVPPLSLHGQLLWREFFYCAATRNPFFDKMVGNPICVQIPWDHNAEAIKAWANGQTGF  
PWIDAIMTQLREEGWIIHHLARHAVACFLTRGDLWISWEEGMKVFEELLLDADWSVNAGMMWLSLSCSSFFQOFF  
HCYCPVRFRGRKADPNGDYIRRYLPVLKNFPTRFIHEPWIAPEVQSAKCI V GKDYPKPMVNHGLASRINIER  
MKQVYTQLSKYRSGTGAGSSLLKEQLRLLATVPNSMPLSFLPKKSQSPQGSASHASAYDQAENERNHEQPLLHQ  
QQPAKQQHQQQPVKQQQFQQYSQHYQHPPQQEISQQSQLHLFPHQSHSHQHLFQQQPPISSAEVDSHLMAPPK  
SPYQSPLAQSSQACKMQILQLVPQQQVQTLDAHQISPMQPPQLHQESHSSQQLRSLNVYSQHIGSSSTYNNQHVVQ  
QVHNLPPQMNYSQIDLPHQNYTTEHMEEGDQNHQWSKENTWQEFNPEFKELKHERETAETDDRGIVNYNHD  
ADLENNLTL

>Thrips\_pal\_XP\_034243121.1\_cry-1

MALIEEISP KGSVLWFRRGLRLHDNPALLKALS VKQEFYPIFIFDGLSAGVTKDTSYNRVRFLLECLQDLDEQ  
LQORMGKLYFIRGDPKNVFEAIIHKIKPLESVSFELDPEPIWASRDNKVKTCLENGCIKWTEEISHTLWDPHEI  
IETNGGIPPLTYEMFLHTVSIIGAPPRVDDPDWTVGVQFGKLPQHLGDDIEVFQSI PSPEKLGYPFKVFSEK  
II EW TGGEQKALLKMNERLKV EENAF L NGFYLPNQAKPDILGPPTSQSAALCFGCLSVRKFYWAIDMYSRIY  
SGHSQSNQHITGQLIWREFFYTMCVQNQYYGEMERNPICLNISWKEDVQDEIQKWENGQTGYPFIDAVMRQMH  
QEGVWHHVARNACFLTRGDLWMNWEIGLRLFLRLLLDADWCLCAGNMMWVSSSAFEQLLDCSSCVCVPSYG  
RRLDPPQGEYIRRYIPELRNFPQEYLYEPWKAPLDVQERAGCFIGREYPDRMVDHADASQKNRRMMRDLRLSLV  
DDTPHCCPSNVEEVQFMWLPESCTDHLCETEKV

>Thunnus\_alba\_\_UBK24976.1

FGTQRNDPNAAALSQ LSPWIRFGHLSAQRVALQVQ RSGKNAGQSVPSFIEELVVRRELTDNFCFYNNKKYDSVE  
GAYEWAQKTLKDHA KDRPYLYTREQLEKAKTHDKLWNGAQYQMVSEGMHGF LRMWAKKILEWTSSPEEAL  
SIALYLNDRYELDGQDPNG

>Thunnus\_alba\_\_XP\_044211749.1

MPSPVVGGAEDSKAVVRKMLREVLVGREDPGEGFFAMCVSVLGHQETRSQFLSLIQPLSTANSSLSVLTISIYR  
EYFTKTEEDELELALTL SLLDMQDHQPSTPSQESRLQLPGNRPNQSSSVHLTSVSNQNSYTVVDEAGRK  
NTNLPQTGPWGKVSPTQTTRESELQKSTHFDKYNKETPGMSQTVCVSRQSASFQKQDTVREGDQLMDSGELNQ  
SEKSKRSKNRRQRRKGSSQVVG LPCSPSAPAPVLLWFRDLRLCDNPALCGSLEVGAPIIPVFIWSPEEEEG  
PGITVAMGGACKYWLHQALSCFCSSLERIGSHLVFLKANGEGNEAGSSLRTLKELVKDTGARTVLANALYEPW  
LKERDDMVVSALQKDGVECKMFHSYCLRDPYSVSTEGVGLRGIGSVSHFMTCCRQNTGSALGAPLDPPVSLPT  
PAHWPLGVSLET LGLARMPRRKDGT MIDWAANIRKSWDFSEGAHARLEAFLHDGVYRYEKESGRADAPNTSC  
LSPYLHFGQLSPRWLLWDAKGARCRPPKFQRKLAWRDLAYWQLTLFPDLPWESLRPPYKALRWSSDHGHLKAW  
QRGRTGYPLVDAA MRQLWLTGWMNNYMRHVVASFLIAYLHLPWQEGYRWFQDTLVDADVAIDAMMWQNGGMC  
LDHWNFMHPVDAAMTCDPCGSYVRKWCPELADLPDELHHPKWKCPASMLRRAGVVFQGTYP ERIVTDLEVRR  
SQSLQDVALVRKEFGQYVDKRTGCDLVPLPRLVSEALGLSHSTGGVV TAGKQFLLPVITRMEFKHQLEDPA  
DAASNPNYAVLKG YVSRKRDETI AFLNERDFTASVMYEGTQRKERLES DYRRMEGLPRPPAPRGRARRPTAK  
DRFSIVPGGAVTSLR

>Thunnus\_alba\_\_XP\_044211978.1

MPVGGDMLIQKGR LAWPKSLHGVTINLYSMFNVLAGDMVNTIHWFRKGLRLHDNPSLRDSIPGADTLRCIYI  
LDWPFAGSSNVGINRWRFLLHCLEDLDASLRKLNLSRLFVIRGQPTDVFPRLFKEWQITHLSYEYDSEPFGER  
DAAVKKLASEAGVEVVVRISHTLYDLDKIIQVNGGQPP LTYKRFQAVINCMDAVGLPAETITSEDIKKCATPI  
SEDHDDKFGVPSLEELGFETEGLT TAVWLGGETEALLRLERHLERKAWVANFERPRMNATSLLASPTGLGPYL  
RFGCLSCRLFYFKLTDLYRKVKKNSTPPLPLYGQLLWREFFYTAATNNPCFDKMEGNPICVQIPWDRNPEALA  
KWVEGQTGF PWIDAVMIQLRQEGWIIHHLARHAVACFLTRGDLWIRWEEGMKVFEELLLDADWSVNAGSWMWLS

CSSFFQQFFHCYCPVGFGRRTDPSGDYIRRYLPILRGFPARYIYDPWNAPEEVQKAAKCIIGVHYPKPMVNHA  
EASRINIERMKQIYQQLSCYKGLGLEETVPANPNNGASGSDIGRVNSGTSQGLGRSSEDPLVLKGTSTQDRGQ  
STQKRRCCEAPPESSSSKSWKQSKLLQKAE

>Thunnus\_alba\_\_XP\_044213520.1

MVVNSVHWFRKGLRLHDNPALQEALNGADTVRCVYILDPWFAGAANVGINRWRFLLEALEDLDSSLKKLNSRL  
FVVRGQPTDVFPRLFKEWKVTRLSFEYDPEPYGKERDGAIIKMAQEFGVETVVRNSHTLYNLDRIIEMNNNSP  
PLTFKRQFTIVSRLELPRRPLPPITQQQMDKCHTKIADNHDQLYSIPSLEELGFRTEGLLPVWVKGGESEALD  
RLNKHLDKRVVWVAFEHPRVNTCSLYASPTGLSPYLRFGLSCRVLYYNLRELYMKLRKRCSPPLSLFGQLLW  
REFFYTAATNNPNFDRMEGNPICVQIPWDQNPEALAKWAEGRGTGFWDIDAIMTQLRHGWIHHLARHAVACFL  
TRGDLWISWESGMRVFEELLLDADWSVNAGSWMWLSCSAFFQQFFHCYCPVGFGRRTDPSGDYIRHYIPILKD  
YPNRYIYEPWNAPEVQKAANCVVGVDPKPKMINHAEGSRLNIERMKQVYQQLSHYRGLSLLASVPTIQEEAE  
PPMTDESQTSSGPDSPRGAADGEDTGCSIAPDSSTICASSNTAPHPDLEEAATSHPSQTACTSSGSHGQYPA  
AITSTSAGHPATAAPPSPASTQAQSPLSRSKPSSPSSSCPALSPTSPATTLTQTSCLGPRRKSILTRKVRRS  
QRQRGRQSCTPAPREGERRAEDEEREAGGDERMEEDVEQEEERMEETCGELAGHQ

>Thunnus\_macc\_\_XP\_042255563.1

MSTSRTIICLLRNDLRIHDNELFYWAQRNAEHIVPLYCFDPRHYVGTYNYNLPKTGPFRLRFLDLSIRDLRNT  
LRNKGSNLVVRRGKPEDVVADLIKQLGSVSTVAFQEEVTSEELNVEKKVKDVCAQMKVKVHSCWGTTLYHRDD  
LPFHHSIRLPDVYTQFRKAVETQSRVRPVFPTPEQLKPLPSGLEEGAIPATAEDLQQTEPVADPRSAFPCAGGE  
SQALGRVKHYFWDTDVATYKETRNGLIGVDYSTKFAPWLMGCISPRYIYHQIQQYERERTANQSTYWVIFE  
LLWRDYFKFVAVKYGDRLFQIEGLQDKSVPWKTDMLKFDWKEGRTGVPFVDANMRELAMTGFMNSNRGRQNV  
SFLTKDLGLDWRMGAWEFELLVDHVCNSNYGNWLYSAGIGNDPRENKFNMIKQGLDYDNGDYVRQWLPEL  
QKIRGSDVHTPWTLSAALSHAQVSLGETYPTPIIIAPEWSRHGNKKPSGTGPSRGGKPSHTPKQHRDRGI  
DFYFSRSKNL

>Thunnus\_macc\_\_XP\_042264816.1

MAPNSIHWFRKGLRLHDNPALREAVRGAGTVRCVYFLDPWFAGSSNVGVNRWRFLQCLELDASLRKLNSRL  
FVIRGQPANVFPRLFKWKISRLTFEYDSEPFQKERDAAIKKLAMEAGVEVIVKISHTLYDLDKIIEINGGQP  
PLTYKRQFTLISRLDPPEMPVETLSDSLGRVCVTPICEDHGDYGVPSLEELGFDTEGLPSAVWPGGETEALT  
RIERHLERKAWVANFERPRMNANSLASPTGLSPYLRFGLSCRFLFYFKLTDLYRKVKKNSSPPLSLYGQLLW  
REFFYTAATNNPRFDKMEGNPICVRIPWDKNPEALAKWAEAKTGFPWIDAIMTQLRQEGWIHHLARHAVACFL  
TRGDLWISWEEGMKVFEELLLDADWSVNAGSWMWLSCSSFFQQFFHCYCPVGFGRRTDPNGDFIRRYLPVLRG  
FPAKFIYDPWNAPEVQAAAKCIIIGVHYPKPMVHHAESRLNIERMKQIYQQLSRYRGLAQ

>Thunnus\_macc\_\_XP\_042266478.1

MPSPVVGADDSKAVVRKMLREVLVGREDEGFFAMCVSVLGHQETRSQFLSLIQPLSTANSSLSVLTISIYR  
EYFTKTEEDELELALTLSLDDMQDHPSTPSQESRLQLPGNRPNQSSSVHLTSVSNQGNSTYQVVD EAGRK  
NTNLPQTGPWGKVSPTQTTRESELQKSTHFDKYNKETPGMSQTVCVSRQSASFQKQDTVREGDQLMDSGELNQ  
SEKSKRSKNRRQRRKGGSQQVVGVLPCSPSAPAPVLLWFRDLRLCDNPALCGSLEMGAIIIPVFIWSPEEEEG  
PGITVAMGGACKYWLHQALSCFCSSLERIGSHLVFLKANGEGNEAGSSLRTLKELVKDTGARTVLANALYEPW  
LKERDDMVVSALQKDGVECKMFHSYCLRDPYSVSTEGVGLRGIGSVSHFMTCCRQNTGSALGAPLDPPVSLPT  
PAHWPLGVSLETTLGLARMPRRKDGT MIDWAANIRKSWDFSEEGAHARLEAFLHDGVYRYEKESGRADAPNTSC  
LSPYLHFGQLSPRWLLWDAKGARCRPPKFQRLAWRDLAYWQLTLFPDLPWESLRPPYKALRWSSDHGHLKAW  
QRGRTGYPLVDAAMRQLWLTGWMNNYMRHVVASFLIAYLHLPWQEGYRWFQDTLVDADVAIDAMMWQNGMCG  
LDHWNFMHPVDAAMTCDPCGSYVRKWCPELADLPDELIHKPWKCPASMLRRAGVVFQGTYPYPERIVTDLEVR  
SQSLQDVALVRKEFGQYVDKRTGCDLVLPLPRLVSEALGLSHSTGGVVTAGKQFLLPVITRMEFKHQLEDPA  
DAASNPNYAVLKGYSRKRDETI AFLNERDFTASVMYEGTQRKERLES DYRRMEGLPRPPAPRGRARRPTAK  
DRFSIVPGGAVTSLR

>Thunnus\_macc\_\_XP\_042266889.1

MVVNSVHWFRKGLRLHDNPALQEALNGADTVRCVYILDPWFAGAANVGINRWRFLLEALEDLDSSLKKLNSRL  
FVVRGQPTDVFPRLFKEWKVTRLSFEYDPEPYGKERDGAIIKMAQEFGVETVVRNSHTLYNLDRIIEMNNNSP  
PLTFKRQFTIVSRLELPRRPLPPITQQQMDKCHTKIADNHDQLYSIPSLEELGFRTEGLLPVWVKGGESEALD  
RLNKHLDKRVVWVAFEHPRVNTCSLYASPTGLSPYLRFGLSCRVLYYNLRELYMKLRKRCSPPLSLFGQLLW  
REFFYTAATNNPNFDRMEGNPICVQIPWDQNPEALAKWAEGRGTGFWDIDAIMTQLRHGWIHHLARHAVACFL  
TRGDLWISWESGMRVFEELLLDADWSVNAGSWMWLSCSAFFQQFFHCYCPVGFGRRTDPSGDYIRHYIPILKD  
YPNRYIYEPWNAPEVQKAANCVVGVDPKPKMINHAEGSRLNIERMKQVYQQLSHYRGLSLLASVPTIQEEAE  
PPMTDESQTSSGPDSPRGAADGEDTGCSIAPDSSTICASSNTAPHPDLEEAATSHPSQTACTSSGSHGQHPA  
AITSTSAGHPATAAPPSPASTQAQSPLSRSKPSSPSSSCPALSPTSPATTLTQTSCLGPRRKSILTRKVRRS  
QRQRGRQSCTPAPREGERRAEDEEREAGGEERMEEDVEQEEERMEETCGELAGHQ

>Thunnus\_macc\_\_XP\_042275043.1

MAHTCIHWFRKGLRLHDNPALMAALRDCKEIYPVFIIDPHLHNSTCVGINRWRFLIGALEDLDCSLKKLNSRL  
FVVRGKPDVFPKLFKEWKITKLTIEYDSEPYSLSRDKRV TALAKEHGV EYIYKISHTLYDIERIIEENNGKA  
PLTYNRMQAIVKTLGPPKRPISAPTMEHMKDVKTPYSENHEKKYGIPTLDELQDMTELGEFPFGGEQEALR

RLDENMKRTGWVCSFEKPQTSFNLSLSPSTTVLSPYLTLGCLSA RTFWWRLTEVYQ GKHS DPPVSLHGQLLWR  
EFFYTASVGIPNFNMEGNPVCTQVDWDTNPEYLA AWREARTGFPFIDA IMTQLRQEGWIIHHLARHAVACFLT  
RGDLWINWEEGQKVFEELLLDGDWALNAGNWQWLSASTFFHQFFRVYSPVAFGKKT DKN GDYIKKYLP LLKKF  
PVQYIYEPWKAPRSIQQAAGCIVGKDYPHPIVQHEVISKKNIQRMK LAYAKRSKDPAESPSKKQGVKRKAPSV  
IDMLKKKNKTA

>Thunnus\_macc\_\_XP\_042283740.1

MLHCFCRSSPFSSSPRLYLRLVIHNRQRPGSVFSCLTNSFTSENTMADKKRKATSAVAKEPSAKQQKLAPMKE  
EKTQRAAGWLQELVRQQRTEKKEMKFNKKRLRFLSDTQKIKQGSEGVLYWMSRDHRVQDNWAMIYAQRLALKE  
DLPLHVCVCLVVPKSELSTLRHYSFMLKGLEEVEKKCKHLGIQFHLLHSGSGEVLPGFVSDRGLGAVVTDFSP  
LREPLQWLEDLKKKL PKDIP LIQVDAHNIVPCWVASPKLEYSARTIRGKITNLLPEFLTDFPLVGKHPYTATR  
TAKPVDWAETLASLQVDRTVGEPEWAKPGTKAGIAMLESFIDVRLKMFGTQRNDPNAAALSQ LSPWIRFGHLS  
AQORVALQVQSRGKNAGQSVPSFIEELVVRRELTDNFCFYNNKYDSVEGAYEWAQKTLKD HAKDKRPYLYTREQ  
LEKAKTHDKLWNGAQYQMVSEGKMHGFLRMYWAKKILEWTSSPEEALSIALYLNDRYELDGQDPNGFV GCMWS  
ICGIHDQGWAERP VFGKIRYMN YKGCLRKFDVARFERKYCPKNL

>Tigriopus\_cal\_TRY67619.1\_TCAL\_02907

MTQSTGSSAIHWFRKGLRLHDNPALLSALAQPGE LRPLFILDPHFVAHAHVGVNRWRFLQQSLQDLDDQLRAR  
GSRLFVARGQPETILPELFFKQWRVQWLTFEVDTEPYALKRDAQIEALAQEAGVVVDSRISHTLYSVHRVIQAN  
HGKAPLTYVSFQKVVAKLGDPP TAVACPPTFPTQS QLS SPADLSDVRYNVPELEELGVKAAELRTCRFPGET  
EGRRRLQEYLSDKRAGWVRAFEKPQTPPNSLEPSTTVLSPYLKFGCVSSREMYWRLQDILKKGKHSQPPVSLV  
GQLLWREFYYVVAADTPHFDRMKGNPLCKQIPWDDNPEY LKAWSEARTGYPWIDAVMIQLRDEGWIIHHLARHA  
VACFLTRGDLYLSWEDGQRVFEELLLDADWALNAGNWMWLSASAFFHQYFRVYSPVAFGKKT DPTGEYIRKYV  
PKLKKYPKEYIYEPWKAPLSVQKAAGCIIGTDY PKPIVNHDTIHKVNIGRHKAAYSQ GKDSNQASGTTKPAKR  
PETGSKGQTSMTKFMKKK

>Tigriopus\_cal\_TRY67732.1\_TCAL\_12461

MVPPSNIVQH FVKRSNRNKQILKMSVGLVTL SILVITYSQYLLHNHCDALECGNDFRSKRQVIETTFMSKSEK  
TSAASESSESTSSVRHPTSTLGAGTSSEGELDIPVEFDSPLMPPKQSQELAKWLQKMMMDLNLNRADPTPMEE  
GSKEYLFPCAHDYKISESLTKVNPT EGQTLDGQGWVFPEDSLCYSLKILKVTGQFNDGKLSGSAKVDFDTG  
SWMRGNFVKGLHGLVRKFWCKFGDCEYFESKKWSVPEHLKEISWYRNGVRTGFAWEFLRGGMMA GEVNEIG  
ELSGPEVS YLYPDKYTMLVGKAIKGQFQSGRESRLSGIEYHNEIIAVPLHLKAQG PLFVREVS NKTHMASNDN  
SLHQSDPYEKQFVSVQDSTVRGSGRGVFLKKDVPMGMIIGFYNGVRMSDFESKIRKADRKSPYRMDNDWAKSK  
QILNIPEGFREP HQYNATLGHLINHGQKPNAWYAMIDHPRFGFIRSVVTQALKAGEEIFCDYGLFKQY AQSD  
EMFKTILEVGKMIHGSDNNADFTKDGEYHDQAE LKRPADKSELSSLVERS VGAAIYRNKAGGPRI IELNMGK  
PPLTYRQFIKIVSEM KPPVPVPALSSRMLGNATSPISEHDERYGVPSLAELGFDTKNLPPSAWHGGETEAL  
SRLEHRLERKAWVASFGRPKMTPQSLLASQTGLSPYLRF GCLSTRLFYHALGDLFRKIRKEE PPLSLYGQLLW  
REFFYTAATKNPNFDRMYGNPICVQIPWDKNPEALAKWANGSTGFPWIDGIMTQLRQEGWIIHHLARHAVACFL  
TRGDLWISWEEGMKVFDELLLDADWSVNAGTMMWLS CSSFFQ QFFHLYCPVRFRGRKADPNGDYIRRYLPVLKN  
FPTRYIHEPWTAP EQVQKAAKCIIGKD

>Tigriopus\_cal\_TRY68590.1\_TCAL\_13499

MSRKSAAGPPTKKARPST DSSSSSSSTTDIEAELERSRLTVDS DVSQDFDFAQRVRWLQGGPPDTPATPRPT  
PGAVVYWMSRDQRVQDNWALLYGQKLAWAHGWPLHVVFCLVPGLD ATLRQYDFMIRGLQEVERELAVRQIHF  
HLLRGAAERLPAFLASRAVTCLVTD FSPLRVPRQWVERVQKQLDPQLPFAQVDAHNVPVWVTS DKQEYAAR  
TIRSKIHRKLDEF LTEFPVSPHPHFQAADSSPIDWTEVFDWLTVDTSVPPVTSFTPGTR AALQNLAQFAGQR  
IPSYADRNDPNVAVLSNISFWAHFGQISMQRAVLYVKKHGRSSAGVAGFVEEAIVRRELSDNFCYYQPDYDN  
VKGAFGWAQKTLAEHRADRPYLYDRSELEKAHTHDDLWNAAQIQMVKEGKMHGFLRMYWAKKILEWTQSPEE  
ALATAIYLNDRYQLDGRDPNGFVGCMWSICGIHDQGWAE RKFVGKIRYMN YDGCKRKF DIKKFILKYGAKAHP  
YLKKVKK

>Tigriopus\_cal\_TRY72624.1\_TCAL\_03947

SVVFQKEVCSEEIQVESSIVKICQAAKIQVKTFWGSTLFHRDDL PYAKKDIPD TYTQFRKTVEARCKVRGLTA  
ECPTWKPLPQVENGLGDIPSLADLKVEPVEVGRSYDPDRSAFPFAGGETSGLDRIHRYYWVSDNVAKYKETR  
NGLLGSEYSTKFSAWLANGSVSPRYIYHKLKEYEAERVSNQSTYWVIFELIWRDYFRFVSWKYADLI FYPGGI  
MGKAYPWQTNKTLFQMWCQGR TGVPFDV DANMRELLYTGWMSNRGRQNVASFLVKDLNLDWRLGA EWFESLLD  
HDVCSNYGNWNYSAGIGNDPREN RKFNMIKQGLDYDPEGKFVQTWVPELQ RVPQGKIHPWTLSEKESGSIGL  
ELGVDYPTPVITAEWSRHFHKTS AKPKDPRNAAGRGRGSKPKSGQQKGIDFYFKSGHTKS

>Tigriopus\_cal\_TRY63317.1\_TCAL\_01827

MSSDPHSM EKPVSILWFRHGLRLHDNP SLHEAVQDAEKEGWQLLLMFI DGETAGTKLCGLNRFN FLL ECLKD  
IHDQLQTLGTRLHVCHGAPIEIFEAIHQTRGIAKLCEQDCEPVWKTRDEGVKNWCQT TGVPWVEKIGHTLWN  
PHEVLALNGGTPPVTFAMFNHVISAMPKPD RPKADVMSQVQFAAIDDELGRKIGLYPTFP GIDYFHLEPEME  
TEKAYIGGERIALRALELR LTHEYEAFTRGTF LPNQRDPDVLCPPKSLSPDLRF GSLSVRK FYWGVLDAFKKS  
QQNTKKPFNPRIISQLLWREFFYTMSVENDYYDEMARNEICVNI PWNPVENNP HWAFLDARTGYPFIDAGMR  
QLYKEGWTHHVVRNAIACFLTRGDLWISWENGLKVFLKYLLDADWSVCTGNWLWISSSS FEEALKSYGIIDPS

LYGRRVDPWGKYVQKYIPELANYPVEYVYEPWLAPKEVQEEAGCIIIGKDYPEPIVDHQKASAENTKRMNDLKE  
YLTRQLSLEPSVSPVEILDFESLAENFGAPEVQCCQECPS

>Tilletia\_indica\_KAE8226999.1

MGSSKGNVLIALLRNDLRVHDHPIFHVASNSKSGSKAASPLTSSLRFSQPITHFLPIYVLDPVFHPHLSGLPNI  
PSSVAEDGSPKTRTLGLWRTSPHRLSYLAHSLADLAGTLQKKGSGLHVYAGRPDRIISSLVKRIEADGYRVEG  
VAMTKEVNSEELRTQSRVRKALEAASSGKPKVFTTDAKPLVPRSILPFELKELPDVYTQFRKRIEGLRPGEGS  
SDYMGAVLEPLPTPESLLPLPGNTAAQSSDAYLLDGKDSRPSVSDVENLIQCLIKPIIDNPTLGIIKKAASLQ  
TQAAQNGAEKVGQDGGKTAQVPSAFPFGGGETEALKRLEHYLGGTNAPGVRYKETRNGMLGEDYSTKFAAALA  
HGTISPRAIABRALAMDEATGRGSGGGYWVVFELLWRDYFYFVGARYRTSLFQLDGIAADMPSKAGEAAQKNY  
PGANGFKNADTDGWVRKSLDDKEDAFVRWAEGRGTGVPLIDANMRELIQTGFMSNRGRQNVASFLTDLGYDW  
RYGAEIFESLLSDYDTNSNWGNWQYVAGVGNDRSSRQFNPIKQAHDYDAQGEYVKAWLPELRSVPTYAVQHP  
WTLNLTQQGIDIGSYPAQPVVENKGMWGRHYWREGSGGGGGGGGGGGGGGGYRGRGRGGGGGGGGGGGGGGGR  
GGRGRGRGRGGD

>Tilletia\_ind\_KAE8230325.1\_CF326\_g467

MSPASTARVLYWFRITDLRLHDSBALLKALDLKPGSFFFPVWCWDPKYVLSHRVGVNRRFRFLLESMEDVSQSISR  
INPNSQLLVVRGDPTTLIPTLCKKWGITHLCFEQDLSGYARRRDASIRQLVKEQCKGVEIVEEQGHYLYSIQD  
ILEKNGKKPTMSMSALQKVVSFKFPDPPRPREAPKTLDPDILPNQSNVKDRISALKALAETLSDIEHYSVDKTS  
KPDINAASAGGDRLPDTEKGRVSCYDTVYGPDLGDSKSKTEERMDELFGVPTLASLGMPSAAGALPEAVIKG  
GETEALRRLDALLKRKEYMATFSKPKTSPAQPADDPATVMSPYLKFGAISIRRLWYDVQDVIKGYKGDKTS  
IPENYEGQLLFREMYAVGELALGDEYQQIRNNKISRYMDWYLPNVYDSGKRVEPRPRGDEASERRLELQVQ  
QTGFPPWIDALVRQLRSTGWIHHLGRHSLAAFLTRGQCWISWERGSELFETWLLDWDPCANPGNLWLSCSAYFS  
QYFRVYGTASFPAKYDKSGSLVRRYCPCLKDFDPKYIYAPHTAPIAVQKQAKCIIIGKDYPHMLDEKEEKAKC  
LARCKAAYGAGFYGTSKEVLEGGKAEAILRKAHGQDPPEMPTDGKAVSKGSKI PDWAKPAVGKDSGAKSKSAP  
PKSQKTSMAKAEDHDEDEDDQHPDTADDDDEHVGEKEDGKGRGKRAVEGEGEDEDEDDRTRRSKRQRTSAGRS  
AAVSKKK

>Tilletia\_ind\_KAE8232765.1\_CF326\_g219

MAPSKKRSIEEEEEESIDPTLAEHPDETEELQPPKSKQRKEPTKSSADKDGLDYSDLPKSPPPYGKGNEM  
NPKKKASGTPLEQLRTALAEQKKPKTSTTEKKNVLYWMNRDLRVEDNRALAEASAFSDRQHIALHIISPEE  
FKAHDRSPRRIDFSLRNLRLIEAQLAKLNIPLVVLTHDGSRTKIAQTVVDLASEWCGCAIFGNLEYEVDLWR  
DAEVVRLGSKQDIHVSFLDDAYIVPPGKISSQDRPYSVFTPFSSRTWLDHLSRNMMDLMQEYDPPEANDDSIHK  
DKTLSSLFSPDSKQYGIKAVPGFECDAEHMEYLWPAGHESAARVMTNFINGKGGVKSLDGPATADELEHVG  
LKAKNSRLNTYTEGRNLLGELGTSHISPYLAAGIISARECLRRSREATGGKLTMERNSGPGMWCIEMVFRDFY  
AHVLAAPWPRVCMGRAFLVKYEDVWETDEATLQAWKEGKTGYPIVDAAQRQCLKQGYCHNRSRMITAMFLTKH  
LLHDWREGEKFFMQNFIDGDFASNNGGWQWSASTGSDPQPYFRIFNPIISQSEKSDPNGDYIRHWVPELNRNIG  
KAIHDPFNRLDKDAFKRLGYPKPIVEHKFARERALARFRKTPGEK

>Timema\_gen\_CAD7588414.1\_unnamed\_pr

MAEGTIIHWRKGLRIHDNPALLAAIEKIYGIHYELRPVFLDPWIVKKLRVGNRWRFLQQAALTDLDNNLHS  
IGSRLYVLRGKPEEVFPRVFSEWRVRKLTFEEDTEPYALERDASVEKLARSAGVSVIRKVSHTLYNPESVLCA  
NLGKPPPTYQKMLSVLDSLGPPEPRPVAIPKDLPOACLPSPRCAPGDNTLIVPTLEELGVEEDQLGPCLFPGET  
HALQMRDCLKNKAWVCKFEKPNTSPNSLKPSTTVLSPYLFGLSARTFYHQLKKTIGNASHSKPPVSLIGQ  
LMWREFYYVVAAGTPNFDKMAGNPVCCQVPWDTNPKYLEAWTKGQTGYPFIDSIMTQLRQEGWIIHHLARHAVA  
CFLTRGDLWISWEEGQKVFEELLLDADWALNAGNWMWLSASAFFHQFFRVYSPVAFGKKTDFGDIYIKKYLVP  
LRKMPPEYIYEPWEAPLSVQQKAGCVVGTDYPRRIVLHEDVYKKNIARMSQAYKDNKT

>Timema\_gen\_CAD7600321.1\_unnamed\_pr

MHPYSSTATHTLTPACVNSSTFPTKVAPSIAEFKFNKRLKMLSKDKVVPDRATGIVYWMSRDQRVQDNWAL  
LYAQGLALKAKLPLHVCFLVPKFLDATFRHYDFLLRGLLEEVAEECKQLSIEFHLLGRAADVLPFVSKHDL  
GAVVTDFSPLEPRSWVKDVTEGLPKDVFPFYQVDAHNIIVPWEASNKLEYAARTIRNKINNKLSEFLSGFPPV  
VRHPHSGKLRQVRAPLTTRNSRSTLPTKVVSFEENGDDDTREEPVDWAEADALLKVDRTVGPVAVAKPG  
TTAGLAVLEGFCNKRLRFLSTKRNDPTIDALSNLSPWLHFGQISVQRCVLVVRHKKTYTESVNAFCEEVIVR  
RELADNFCFYNDKYDSIEGTNDWARITLNAHRKDKRQYIYSREELSEGLTHDELWNSAQLQLVKDGKMHGFLR  
MYWAKKILEWTDTPERALADAIYLNDRYSLDGRDPNGFVGCMWSICGIHQGWREDFIGKIRYMNIEGCKRK  
FNIAAFVSRWGGKKHKYVAKK

>Timema\_gen\_CAD7601223.1\_unnamed\_pr

MALNNSIMSVETKPKHTVHWFRKGLRLHDNPSLREGLIGATTFRFCVFIIDPWFAGSSNVGINKWRFLQSLD  
LDHSLRKLNSRLFVIRGQPADALPKLFKEWGTNTLTFEEDPEPFGRVRDHNMAMCRAMSISVISHVSHTLYQ  
LERIINKNGGKAPLTYHQFTVIASMESPPPAEPTVNHKFLKACYTPVQDDHDELYGVPTLEELGFDTQGLRP  
PLWQGGESEALARLERHLERKAWVASFGRPKMTPHSLLASQTGLSPYLRFGCLSTRLFYYQLTDLYKKIKKAV  
PPLSLHGQLLWREFFYCAATKNPNFDKMLGNPICVQIPWDRNKEALAKWANGQTYGPWIDAIMTQLREEGWIIH  
HLARHAVACFLTRGDLWVSWEEGQKVFEELLLDADWSVNAGMWMWLSLSSFFQQFFHCYCPVRFGRKADPNGD  
YIRKYLPLKNFPTRYIHEPWNAPAVQKAAKCIIVGKEYSLPMVNHVVVSRIINMERMKQVYQHLTKYRDPGAP

DTRPAVLCPLDKNTPRGTDCLGDFEQTPNIETGHIKKEVPSSLSQQAIDHWEEVTPDPAISYMDFVSMDEDVA  
VCGEVTDADIVA EVLNNNIQVEDGASGDEEDNSSLVQERSISSAAEATDHIQELGRFFLKSQQCK  
>Timema\_gen\_CAD7604462.1\_unnamed\_pr  
MACCDADGLFTMIEPGHAGRNTDGVHPTEIRTSISPSSA VELNTTGALANYATEAVVVMFSEK GKKNVHVHFR  
HGLRLHDNP AFLEALKDGEIFPIFIFDGETAGTRVVGYNRMN FLLESLHDLDLTQLRKFGGQLFLFQGS PVHI  
FERLWEEVGLQKICFEQDPEPIWHTRDSSVKQFCEERGIHWVEKVSHTLWEPHQVVKTNNGGTPPLTYQMFLHT  
VSVIGKPSRPAEDLDFTGVKFGVLPQYLAEFEKCLVSCIPLFWITMFSWTYELTMLLAQIAFISIKHRKNYFW  
GDESKCSRNSLTAQDLGLQQDVSASERMVCWVGGETRALENLSDRMQVEEAAFRRGFYLPNQSLPDL LGPPTS  
QSAALRFGCLSVRRISAVHFILPLES  
>Timema\_she\_CAD7261249.1\_unnamed\_pr  
MDEKTMALNNSIMSVETKPKHTVHWFRKGLRLHDNP SLREGLIGATTFRCVFILD PWFAGSSNVGINKWRFL L  
QSLEDLDHSLRKLNSRLFVIRGQPADALPKLFKEWGTTNLTFEEDPEPFGRVRDKNIMSMCGAMSISVISHVS  
HTLYELERIINKNGGKAPLTYHQFQTVIASMECPPPAEPTVNHKFLKACYTPVQDNHDELYGVPTLEELGFD T  
QGLRPPLWQGGESEALARLERHLERKAWVASFGRPKMTPHSLLASQTGLSPYLRFGCLSTRLFYYQLTDLYKK  
IKKAVPPLSLHGQLLWREFFYCAATKNPNFDMKLGNPICVQIPWDRNKEALAKWANGQTGF PWIDAIMTQLRE  
EGWIIHHLARHAVACFLTRGDLWVSWEEGQKVFD ELLLDADWSVNAGMWMWLS CSSSFFQQFFHCYCPVRFG RKA  
DPNGDYIRKYL PVLKNFPTRYIHEPWNAP EAVQKAACIVGKEYSLPMVNHVVVSRINMERMKQVYQHLAKYR  
DPGSCVTRLMSSDNITPGSGNCPVTINLIQQ  
>Timema\_she\_CAD7267052.1\_unnamed\_pr  
MAEGTTIHWFRKGLRIHDNPALLAAIEKIDGIHYELRPVFVLDPWIVKKLRVGPNRWRFLQ QALTDLNNLHS  
IGSRLYVLRGKPEEVFPRVFLEWRVRKLT FESDTEPYALERDASVEKLARSAGVSVIQKVSHTLYNPESVIRA  
NLGKPP LTYQKMLS VLD SLGTPVCPVATPKDLPQACLPSRCAPGDNTLVVPTLEELGVEEDQLGPCLFP GGET  
HALQRMNCLKNKAWVCKFEKPNTSPNSLEPSTTVLSPYLKFGCLSTRTLYHQLKQTIGNASHSKPPVSLIGQ  
LMWREFY YVVAAGTPNFDKMVGNPVCCQVPWDTNPKYLEAWTKLRQEGWIIHHLARHAVACFLTRGDLWISWEE  
GQKVFEELLLDADWALNAGNWMWLSASAFFHQFFRVYSPVAFGKKTDFGDIKKYLPILRKM PPEYIYEPWK  
APLSVQQKAGCVVGTDYPRRIVLHEDVYKKN IARMSQAYKDNK  
>Timema\_she\_CAD7267885.1\_unnamed\_pr  
MFAEKGKKVSVHWRHGLRLHDNP AFLEALKDGEIFPIFIFDGETAAYSLGTQTVGYNRMN FLLESLHDLD T  
QLRTFGGQLFLFQGS PVHIFERLWEEVGLQKVCFEQIHGDSRRARKKSWANAAPSEQGNPKLLPIPEDQGVN  
HVLRHQRIRQCDYSPVVLRVVMPLSELAEQPSVSVEAKESEEDVVM PKATPRTEWDDSSVTSLESIVVADVQ  
QIAHQEEDETETVKELTMFDLMQALRDSSKESMEKMDASMKS LR DGVISILDSHSKEWRSSHDQLKNEVTVIE  
VQVQDLTEVVTEVKVQVENQVIQQGQYQGELRTTRSRRDELEERVNSRVEAVSEVVDHLQQDVSQVSGLQLAI  
RGQEKITTRNCEL TTEQKVREQLERDLLSNKEEVLALTNDPEPIWHARDT SVKQFCEERGIQWVEKVSHTLW  
DPHQVVKTNNGGTPPLTYQMFLVRYH  
>Timema\_she\_CAD7269262.1\_unnamed\_pr  
ARRKDKRQYVYSREELSEGLTHDELWNSAQLQLVKDGKMHGFLRMYWAKKILEWTDTPERALADAIYLNDRYS  
LDGRDPNGFVGCMWSICGIHDQGWRE RDI FGKIRYMN YEGCKRKFDIAAFVSRWGGKKHKYVAKK  
>Toxocara\_can\_KHN85742.1\_photolyase  
MLVDKVMVSPRIQPLNRQQAFKGGYVLYFLRCLRVKCSPAFSFASERANAFKVPLIAVHLYIPERHNI PQRV  
FLLQGLKELTESMEEIKAKLLCVKAKGYEEALS VAMKLCENACEVIVDAAYLREDREFEERLNDSLIKASRKL  
TRVEGNVSVPNLASNCVEWGARTLRPKVWQHVKAMLA EKWDDVPTTPCDSIKKSVVSGIAEMNLDEELKKA E  
ADCKSDSGLTGGEKVAQRMLNFFITNRLVNYHPGRNIPGSKYQSLMSPYLHFGMISSIEIIKRAKSSNAPKHP  
IDSFIEELLVRRDL SHNFVYYARDNYDSLCLPDWAQKT LNEHKKDKREYIYTYEQLED SRTHDPYWNAAQME  
MVHTNKMHGMYMRMYWGKKVIEWTPDYETAYRYLIEQNDKHELDGRDPNGFTGVIWNFGMHDRAHAERAVFGKL  
RYMNAEGLHRKYKKTIGDYVRYNYKLGRKIEGPIEPPKMKDKKAKIGKRAREESEE EWSGREEEEP KAGSSR  
GKKAASIDKKAKLEVKKGKPTRGGAMSAYLLRAKAKN  
>Toxoplasma\_gon\_CEL73623.1\_TPA:\_DNA\_p  
MPHPTQTSSPKAAGQQSMGLKRSSSAGHEQKSQKKT KKAATLPQAPGWIKNGCVDERVRLLTEGIQKPKADG  
KVVICYLQRDMRVQDNWALLLAQEAAARSLNKPLVVIHLLVPGLAFQPTRRHLSFFMGGAREVETELKSLNIGF  
ELPIVSKKDPKGR LDEANKKIEE VFDALQPALAVCDFNPLRLPTQVVEALTRVYAECLSPLYQVDTHGVVPCW  
VASDKLETAARTLRPKLMELVKEFATPF PKVQRMTPVWHTKLFPLDEDRI LSELKPDPPEPLDSWKPGTKAA  
LELLHSFATPKNLAEYGKSRNDPVAGVQSDLSPIYHFGHISVQRCLLEVSKLKSTAADKTLKEGVMSFIDEV V  
VRSQSLDNFVFFNPHYDDIKGAPLWAQQDTLNIHAKDKREPHYGFAALEAGKTYDELWNAAQQLVRDGMHGY  
LRMYWAKKILEWTKSPQEALKIAIALNDKYHL DGTDPNGVTGCMWSICGVHDQGFKERPVFGKIRYMNYPGCE  
RKFDVKA FVRKFPGAENAVNVAKQGM LPFTGRAKIELKGVAEGGDS DRVASILTKKIEQQKPQNTISGPATT  
KETAQTKGSAKKRQRKQSDGDLAPPRNEGVDVEEADINVEEDVHLSE  
>Toxotes\_jacu\_XP\_040886430.1  
MVINTIHWFRKGLRLHDNP SLKESLQGADTVRCIYILD PWFAGSSNVGINRWRFL LQSLEDLDSSLRKLNSRL  
FVIRGQPTDVF PRLFKWKITRLSYEYDSEPF GKERDAAIKKLASEAGVEVTVRTSHTLYDLDKI IELNGGQS  
PLTYKRFQTLISRM DPVEVPVESITAEIMGKCTT PLSEDHDDKFGVPSLEELGFDTEGLSSAVWP GGETEALT

RLERHLERKAWVANFERPRMNANSLASPTGLSPYLRFGCLSCRLFYFKLTDLYRKVKKNSSPPLSLYGQLLW  
REFFFYTAATNNPCFDKMESNPICVQIPWDRNPEALAKWAEGRGTFPWIDAIMTQLRQEGWIHHLARHAVACFL  
TRGDLWISWEEGMKVFEELLLDADWSVNAGSWMWLSCSSFFQQFFHCYCPVGFGRRTDPNGDYIRRYLPILRG  
FPAKYIYDPWNAPESVQKAACIKIGVHYPKPMVHHAEASRLNIERMKQIYQQLSCYRGLGLLATVPSNSSGNG  
NGNNEASSDAMGFHVEATHDAAAASGYQMPVHSQGDWQSGVMMYLQGDPAQASISTHQQGYAGTSSSMCYTQG  
SQQIPAPVIQKGPEHHSTTQTSGKRHSEDSGNGKSSKVQRQSSR

>Toxotes\_jacu\_\_XP\_040893925.1

MVVNSVHWFRKGLRLHDNPALQEALNGADTVRCVYIILDPWFAGAANVGINRWRFLLEALEDLDNSLKKLNSRL  
FVIRGQPTDVFPRLFKEWKVTRLTFEYDPEPYGKERDGAIIKMAQEFGVETIVRNSHTLYNLDRIIEMNNNNP  
PLTFKRQFQITIVSRLELPRRPLPPITRQQMDKCQTKIADNHDQLYSIPSLEELGFRTEGLPPAVWRGGESEALD  
RLNKHLDKKVWVANFEHPRVNTCSLYASPTGLSPYLRFGCLSCRVLYYNLRELYMKLRKRCSPPLSLFGQLLW  
REFFFYTAATNNPNFDRMEGNPICVQIPWDQNPEALAKWAEGRGTFPWIDAIMTQLRQEGWIHHLARHAVACFL  
TRGDLWISWESGMKVFEELLLDADWSVNAGSWMWLSCSAFFQQFFHCYCPVGFGRRTDPSGDYIRRYIPILKD  
YPNRYIYEPWNAPESVQKAANCVVGVDPKPMINHAEGSRLNIERMKQVYQQLSHYRGLSLLASVPTIQEEAE  
PPMTDESQTSSGPDSPPRDPVDSEAAGCSTAPDSSTVCTSATYAPHPAPGDTPNSHPLAPPCTSSISHTQPS  
AAVTSTSASHPPSAAAASSPASTPIQSPLSRKSPSSSSCPTLSPSPSPAATPAQTFPKRKGLGRKVRRSQR  
QRGRQSGTSPSGREGERRAEEEEEREETRGEERMEEDVEQDEERMEETSGETAGHQHHEGTWWS

>Toxotes\_jacu\_\_XP\_040894004.1

MIGVLTIVYNKLVFCLKKKTFYIEYIVTFHLKMPPSAAGAEDSKAFVRKMLREVLVGREDPEGFFAVCVSVL  
GHQETRSLRFLSLIQPLSTANSSLHSTLTSIYREYFSKTEDDELELALALSVLEMKDHQLSTPSQQSRLQQPGD  
SPNQSSCVQLTSVSQPQGSSTQLADVAGRRKNTHSAQTGPWGMVCPPTTQETELQKSTHVDKDKETPGTS  
KTVCVSRTYASFQKQGTVKEGEMIEEGDLNQSEKPKRSKNRRQRRKGSQQVVGGLPCSPSAPAPVLLWFRRD  
LRLCDNPALVGSLEVGAIPVPIVFIWSPEEEEGPGITVAVGGACKYWLHQALSSFCSSLESIGSHLVFLKANGE  
GNRMESLQTLKELIKETGARTVLANALYEPWLKERDDMVVSALKRDGVEFRMHHSYCLRDYPYSVSTEGVGLR  
GIGSVSHFMSCCRQNPGSALGVPLDPPVSLPTSAPHPQGVSLDTLGLARMPHRKDGTTIDWAVNIRKSWDFSE  
KGAHAKLEAFLHDGVYRYEKESGRADAPNTSCLSPYLHFGQLSPRWLLWDAKGARCRPPKFQRKLAWRDLAYW  
QLTLFPDLPWESLRPPYKALRWSSDRGHLKAWQGRGTGYPLVDAAMRQLWLTGWMNNYMRHVVASFLIAYLHL  
PWQDGYRWFQDTLVDADVAIDAMMWQNGGMCGLDHWNFVMHPVDAAMTCDPYGSYVRKWCPELVNLPDELIHK  
PWKCPASMLRRAGVVFQGTYPRIITDLEERSQSLQDVALVRKEFGQYVDKRTGCDLVPLPRLVSEALGLS  
HRDGGAVAEGKQFLLPVIITRMEFKHQLEDPDADAASNPNYAVLKGYSRKRDETI AFLNERDFTASVMYEGAQ  
RKERLESDYRMEGLRPPAPRGRARRTPTAKDRFSIVPGGAVASLR

>Toxotes\_jacu\_\_XP\_040898972.1

MTKTCIHWFRKGLRLHDNPALMAALRDCKKLYPVFILDPHLHNNTPVGINRLRFLLGALKDLDDSSLKKLKSRL  
FVVRGKPEDVFPKLFNEWKVTKLTYEYDTEPHGLIRDKKVTALAKDHGVEVIYKISHTLYDIDRVIEENNGKA  
PLTYKRMQAILKSLGPPKKPVPAPTMEKMDVKTPCLENHEKKYGIPTLEELSQDTAALGEELFPGGEQEALR  
RLDEHMKRTGWVCSFEKPQTSNPNSLSPSTTVLSPYVTHGCLSARTFWWRLTEVYQGGKHSPPVSLHGQLLWR  
EFFYTTSGVPIPNFNKMEGNSVCTQVDWDTNSEYLAAREARTGFPFIDAIMTQLRQEGWIHHLARHAVACFLT  
RGDLWISWEEGQKVFEELLLDGDWALNSGNWQWLSASAFFHQFFRVYSPVAFGKKTDKSGDYIRKYLPLKKKF  
PAEYIYEPWKAPRSIQQAAGCIVGKDYPRPIVQHEMISKKNIQRMKLAYAKRSPDSTESPSKEQGVKRKA VSI  
VDMLTKKQVRK

>Toxotes\_jacu\_\_XP\_040910374.1

MLLCIWRISFSSAPKRLLLKGIHNSQRPIPTLSLLIKSFTSETIMSDKKRKAASAPAGKEPSPKQQLAPVK  
EEKKARAAGWLQDLVKQQRPEKKEMKLNKKRLRFVSDTEKIKQGSEGVLYWMSRDQRVQDNWALIQAQRLAMK  
ENLPLHICVCLFVQKSELSTQRHYSFMLKGLEEVAKECKTLNIQFHLHGTAGEVLPGFVSDRSLGAVVTDFT  
PLREPLQWLEDVKKKLSKDIPLIQVDAHNIVPCWVASPKLEYSARTIRGKITNLLPEFLTDFPLVEKHYPYTAT  
RTAKPIDWDKTLASLQVDKAVGETEWAKPGTKAGMAMLESFIDVRLKLFGTQRNDPNAAALSQLSPWIRFGHL  
SAQRVALQVQRSGKNAGQSVSSFIEELVVRRELTDNFCFYNNKYDSVEGAYEWAQKTLKDHAQKRPYLYTRE  
QLEKAKTHDKLWNAAQYQMVTEGKMHGFLRMYWAKKILEWTSSPEEALSIALYLNDRYELDGDQDPNGFVGC MW  
SICGIHDQGAERPVGKIRYMNKYGCTRKFDVARFERKYCPKNL

>Toxotes\_jacu\_\_XP\_040921539.1

MKERTLLSATKRPVCVSRNTAALSNTKSMSASRTIICLLRNDLRLHDNLELFWAQRNAEYIVPLYCFDPRHY  
VGTYNYNLPKTGPFRMRFLLESIRDLRNTLLSKGSNLVVRGKPEDVVAELIKQLGTVSTVAFHEEVTSEELN  
VEKKVKDVCAMKVKVHTCWGCSLYHRDDLFPFHHISRLPDVYTQFRKAVETQSRVRPVFPTPEQLNPLPPGLE  
EGAIPTAQDLQQTPLTDPRSAFPCSGGESQALARKHYFWDTDVATYKETRNLIGVDYSTKFAPWLAMGC  
ISPRYIYHQIKQYERERTANQSTYWVVFELLWRDYFKFVGMKYGNRLFQVKGLQDKSPVWKDKMLFNWAKEG  
QTGVPPVDANMRELAMTGFMNSNRGRQNVASFLTDLGLDWRMGAWEFYEYLLIDHDVCSNYGNWLYSAGIGNDP  
RENKRKFNMIKQGLDYDNNGDYVRQWVPELQGIKADVHTPWTLASAAALSHANVSLGETYPTPIVIAPEWSRHV  
NKKSSGAGTSPRGKKGPSNTPKQHRDRGIDFYFSRSKNL

>Treboxia\_sp.\_KAA6423187.1\_DASH\_famil

MAQEAIQKSRVIVWFRDDLRLHDNPTVHAAATKVVKTKQAAEVVPVYCFDPRHFGTTPYGSKKTGDYRAKFLLE  
SVQDLKQNLKSIGSDLLIHMGRPEDALAEANVEQKTTILLQTQITSEELNVEAKVKRAVKGAQCESVWGHT  
LYHPEDVPYKLDMSDLPDTFTPARHKIEQHAQVRAALPTPQQGELPLPEGLPKAMLECNPQAVEDLNAVVPKG  
SQQLSTQELNEHAVHRFTGGESEALARLKYYLWDTDLLASYFQTRNGMLGGDYSTKFSPLAHGNLSARTIYH  
EIKKYESERKANKSTYVWIFELLWRDYFRFFTQKHGNKLF AEYGITGKKLRWSEDPQAFQRWKDGQTGLPLVD  
ANMRELKQGTGFMSNRGRQNVASYLVLDMGVDWRKGADWFETVLQDYDVC SNWGNWVAAAGLTGGRINHFNITK  
QSKDYDLEGEYVKTWIP ELKDVSSKRIHEPWLMSQSEQQQFGV SIGQDY PAPI PSSQLVRPHGSPEGGRNPGG  
GRGRGRGGKRGHGRGRQNDRHRTQPRGEYERFG

>Treboxia\_sp.\_KAA6427543.1\_CPD\_photol

MAGGRKRKEKDMVEHSDSKSKAEKERASSSSEEEAGPSSAASAEGGIHVHPKRIRELKGGEVKKGPVIYWMS  
RDQRSKDNWALLYACEVAQRSGSNVVVAFNLVTEFLGAGARQWGFLVRGLRQVEPKLKELNIPFYMMYGKAED  
NVPKLVEDLGAGLLICDFVPVRAAREWREKTRDELSIPMHEVDTHNVVPVWEASDKKETAARTIRKKIHTKLP  
MYLEDFPEIIPKQAEWRCKRMPDKIDWDGLIADVLQRGTDVPEIPWFKPGEDAAYDALSGKEGFLTPERLKVYN  
DMRNDPCSPKAVSTLSAYLHFHGLSGQRVALEASKHRKKYKEAVDGFLEEVVVRRELSDNFCHYEPNYDNIKG  
AAQWAQDSLEKHKEDEREYVYSMEQFEKAQTHDDLWNAQAQNMVHLGKMHGFMRYWAKKI FEWTRTPEDALD  
ISIQLNDKWEMDGRDPNGYVGC MWSVCGVHDMGWKERPIFGKIRYMNYNGCKRKFNVQKYIDMVNEKVEELKN  
MH

>Treboxia\_sp.\_KAA6427658.1\_6-4\_photol

GLRLHDNPALLEALKGCKHLYPVFVDFPWFAGNGKVG TNRF SFLLD SLHDL DASFKARGSR LIIVHGNPPDIV  
PKLIKAWNIGKVCFEADTEPYSKARDKNMVEGIEATGVPWHSFVSHTLYDTAKLLQLNKGQVVTAYS AFQRLA  
QKSGSPGAPVSDPPS QLPP I PVDAPKALD TVGLTENGVPSLTDIGYHDQPTSPFKGGETLALKRMEEHIADKA  
WVVQFEKPKGNPAALEPATTVLSPYLKFGCLSVRVFYKRLQEIEAGAKQASQPPVSLRGQLLWREFFFYFVGAN  
TPNFDQMEDNPGWMHHLARHAVACFLTGRDLYCPWTAGRDVFDRLIIDDDWSLNNANWMLSASAFFYQYHRV  
YSPITFGRKYDPNGDFVRKFVPELKDFPAKWIYEPWKAPIADQKQANCRIQVDY PKPMVDHASVSKDNILKLK  
DAYADQSPSKGKTLPHASSPSGTSPSHTRKKQASRPVGAQQHEDAQAQASTVQAASGEASGMHTKEPRSGFDD  
MTLPDDSDHTHVARSDADGAGPSGAPDVRADSNRTGQGANGQLGAVPVMAGPGVFPDGADQDDVEPEATLPGG  
TARGGSKSGSNGQTAHASDAKQKKLDWTAATGGHKKR KAGSESKSPAK

>Trematomus\_bern\_\_XP\_033972501.1

MAHTCIHWRKGLRLHDNPALMAALRDCKELYPVFILDPYLYNNTLVGINRWRFLIGCLKDLDCSLRKLNSRL  
FVVRGKPEEVFPKLFEKWKVTKLTIEYDTEPYSLSRDKTVTTLAKEHGVVVYKISHTIHDMDRIIEENNGKA  
PLTYNRFRITILKTIGNPKKPIPAPIEDTKDVKTPCSENHDKNYGIPTLEDLGHDTTTLGEEKFPGGEQEALR  
RLDENMARKDWCKFEKPQTS PNLSPSTTVLSPYVTFGCL SARTFWWRVTEVYQGGKHSEPPVSLHGQLLWR  
EFYYAAGVGIPNFDKMEGNPVCTQVDWDTNPEYLAAREARTGLPFIDAIMTQLRQEGWIHHLARHAVACFLT  
RGDLWINWEEGQKVFEYLLLDGDWALNAGNWQWLSASAFFHQYFRVYSPVAFGKKT DKNQDYIKKYLPLLKKF  
PAQYIYEPWKAPRSVQQAAGCIVGKDY PQPIVQHEVISKKNIQRMKLAYAKRSADS AESPNESPSKKQGVKRR  
AKSVIDMLQKKDKK

>Trematomus\_bern\_\_XP\_033989275.1

MVINTIHWFRKGLRLHDNP SLKDSLLGADTVRCVYILDPWFAGSSNVGINRWRFLQLSLEDLDSSLRKLNSRL  
FVIRGQPTDVFPRLFKEWNISRLSFEYDSEFPFGKERDAAIKKLACEAGVEVTVRISHTLYDLDKI IELNGGQS  
PLTYKRQFTLISRMDAVEEPADSITADIMGKCRTP LSENHDDKFGVPSLEELGFDTEGLSSAVWPGGETEALT  
RLERHLERKAWVANFERPRMNANSLASPTGLSPYLRFGCLSCRLFYFKLTDLYKKVKKNSSPPLSLYGQLLW  
REFFYTAATNNPCFDTMESNPICVQIPWRNPEALAKWAEGRGTGFPWIDAIMTQLRQEGWIHHLARHAIACFLT  
TRGDLWISWEEGMKVFEELLLDADWSVNAGSWMWLS CSSSFFQQFFHCYCPVGFGQRTDPNGDYIRRYLPILRD  
FPAKYIYDPWNAPEGVQKAACCIIGVHYPKPMVNHA EASRLNIERMKQIYQQLSCYRGLGLLASVPSISNGNG  
ETSSEGMGFSADGTHNAAAAPSGPEHHVSTLSGGKRPCEDPRNGRGSKIQRQSTH

>Trematomus\_bern\_\_XP\_033993791.1

MLYSICRSSSFLRQYLKVVAQSDQGPTSLFSTKAKAFTSQAIMSEKKRKSTSA AAAAVKEPSAKQQKLDPTKEK  
GWLQDSLKQQR TKNKELKFNRQLRYTSNTERIKQGSEGVLYWMSRDHRVQDNWALIH AQQLALKEKLP LHV  
FCLFVPKSLSLTLRHYSFMLKGLKEVEKECKALDIQFHLLHGSAGDVLPGFVSDRELGA VVTD FSPLREPLQW  
LEDVKKTLPKDIPLIQVDAHNVP CWVASPKLEYAARTIRGKITKLLPDFLTDLP LVEKHPTYAARTAKKVDW  
EKTLASLQVDR TIEPEWAKPGTKGGVAMLESFIDERLKL FATQRNDPNAAALS QLSPPWIRFGQLSAQRVALQ  
VQHCGSSAGPAVASFIEELVVRRELTDNF CFYNEKYDCVEGAYEWAQKTLKDHAEDKREYLYTREQLEKAKTH  
DKLWNASQYQMITEGKMHGFLRMYWAKKILEWTSSPEEALSIALYLNDRYSLDGQDPNGFVGC MWSICGTHDQ  
GWEREVFGKIRFMNYKGCQRKFDVAKFERKYCPKNL

>Trematomus\_bern\_\_XP\_033997855.1

MAPSAAASEDRKALVRRMLIEVLMGREDPEGFFAMCVSALGPQETR SQFLALIQPLSTANSSSLHSGLT SIYEQ  
YFSKTEDDELQLALALSLLEV KDDQLSSPSQDSPLQPPRDRPNQRSPA QKSTVSQPQGN SHTKPADGVGRREH  
TITTQTEARVKASPLQTFRETELQKNNVDKYKMGT PGTSLAGCVSSPSGLFLKQNTIEKDNQMMNEGD LNQPE  
TPKCSKNRRQRRKGAGQKIVGLPCSPSAQPPVLLWFRRDLRLGDNPALIGSLEVGSPIPVFIWSP EEEEEGPG  
ITVAMGGACKYWLHQALSCFSSSLERIGSHLVFLKANGSSSLCTLKELVRETGARTVLANALYEPWLKERDDDV

ESALQKDGVECKMYHSYCLRDPYSVSTEGVGLRGIGSVSHFMNCCRQNPGSALGAPLDPPVSLPTPAYWPQGV  
SLDVLGLGRMPRRKDGTIDWAANIRKSWDFSEDGACARLEAFNLNDGVYRYEKESGRADAPNTSCLSPYLHFG  
QLSPRWLLWDAKGARCRPPKFQKRLAWRDLAYWQLTLFPDLPWESLRPPYKALRWSSDRDHLKAWQGRGTGYP  
LVDAAMRQLWLTGWMNNYMRHVVASFLIAYLYLPWQEGYRWFQDTLVDADVAIDAMMWQNGGMCGLDHNFMV  
HPVDAAMTCDPYGSYVRKWCSELAELPDELVHKPWKCPAPMLRRAGLVFGQTYPERIVTDLEERRSRSLQDVA  
LVRKEFGQYVDKRSGLDVLPLPQRLVSEALGLSHRDGGVVTEGQQFLLPVITRMEFKHQLEDPDADAASNPN  
AVLKGYVSRKRDETI AFLNERDFTASVMEYEGVQRKERLESDYRRIEGLPGLPAPRGRARRPTAKDRFSVVS  
GAVSSLR

>Trematomus\_bern\_\_XP\_034001951.1

MSTSRTIICLLRNDLRLHDNELFHWQRNADHIVPLYCFDPRHYVGTYNYNLPKTGPFRLRFLFDSIRDLRHT  
LLHKGSNLVVRRGKPEEVVADLIKQLGVSSTVVFHEEVSSEELNVEKRVKDVCAQMVKVHTCWGSTLYHRDD  
LPFNNISRLPDVYTQFRKAVESQSQVRPLIPTPEQLKPLPQGLEEGGIPTAEDLEQTEPVTDPRAFPCTGGE  
SQALARLKHIFYWDTNAVATYKETRNLIGVDYSTKFSSWLALGCISPRYIYHQIQQYEKERTANQSTYWVIFE  
LLWRDYFKLVGVKYGNRLFQIKGLQEKSVPWKKDKMLFDWKEGRTGVPFVDANMRELAMTGFMNSNRGRQNV  
SFLTKDLCLDWRMGAEWFEYLLIDHDVCSNYGNWLYSAGIGNDPRENKFNMIKQGLDYDNNGDYVRQWVPEL  
QGIMGSDVHTPWTLSTASLSHADVSLGETYPTPIVMAPEWSRHKANKPSGAGSSARGKKGPSHTPKQHRDRGI  
DFYFSKSKNL

>Tremella\_mesent\_XP\_007007703.1

KVDEDPPLDQLMRLQLHGGEKVPNGESVYVWMMEDVRIDDNTALYKASQKAQQLHLPLVVLNLSPEWKIH  
DRSSKKIDFLLRNLRLDKPKFDALNIPLYMTSFDRRLQIPRRVITDLMPLFKSHHLFVNLEYEDELRRDIAT  
VKFGQEKGVKVECFHDLRVVPPGRITSQAGKPMVSFSPWQRQWAKLLEKEPNLLEVSPLPQGNDSVRQGPLK  
DLFDATSVPEDIKDFVPEDKHLLEKECWPEGTDAARQLLDRFLHTKARKKQFQLVSPLTEGAEEDDKHSRVREY  
QDGRNLVDGDNSSRLSPYLALGVISGRMVLNEAAKLGKGRLESGRDTGVGMWVQEVSWRDFYNHVMARCPRV  
SMGRPFLEKFADVQWEINEENLQAWKDGTGYPIVDAAMRACKARGWMENRVRMVSAFLVKSLLLDWRLGEK  
YFMESFIDGDLAANNGGWQWTASTGTDPQPYFRIFNTLTQSQKCDPNGDYIRYWVPELKNLKGKAVHDPFHSM  
PRNEFNKLGYPPIVDHDKQSREALFRYKNVGQKEE

>Tremella\_mes\_RXK37313.1\_M231\_05455

MSKPSRVLYWFRTDLRITDSPALITALSLPDIKAFYPIWCWDPSYIYGHRVGLNRWSFLLESMDLSDQLTSL  
NPRQKLHVCGRGSPEEVLPLVLRWEGITHIVWEKDANAYAKIRDECIKRLAKEKGVVVDVPGRHLFDPLVGR  
MNGGKPTMTLQWQWNTTKKIGKVEQPSLTPTILPDPGDTTLRYSRKEYKWDKVDMAHLRTGKDTCFDHFTGP  
KGDFSVPTLSQMGYPSTTSIRGGTTQAHRLNTFLSHPQAVATFSKPHTAPTALPESTTLISPYLKFGCVGV  
REIWWGCKRVVEAYKGEKTKPENMFGQLEFRDMYACAEALQPHFERIRGNSVCYRIDWGLQNYDERGIEIL  
PRPRGEEEDERRFEAWREGCTGFPWIDACMRQLKSEGWIHHLARHSVACFLTRGQCYISWERGMEVFDEWLID  
WDPASNPGNMMWLSCSAFFSQYYRVYGLVSWPQTDTKTGALVRKYCPELEKFPDKYIYAPHTAPLSVQEAAGC  
VIGQDYPLPILDERAEKDRCLARIKNAYQLGFRGADPEVLSEADKRLKELHEKSGASTVKSEKERDEEKGR  
KREREGDGTLDGYVKRQK

>Tremella\_mes\_RXK40197.1\_M231\_02471

MSRPNTFIHLHTLDRTHDPLSLHLSPRSSISKRVTHFLPVYIIDSRLDISHLPHALPSLPPRLPNANSP  
AEDGSGHGEQDKGDNNTSPSPRSRVANFHRTSPYRLRFLLESIFYLRDITYRRAGGDLIGYGRADRLPLVLVQ  
KLKETSEVEGVWAQDEVTVEEKDMLANLEVVLQKIGVKLNKVDSTLLAIKDLFPDRRQTPDVYTAFRKNCEG  
LGLSLGMLKQPLRTSHLSQGNVKIDIDGQGLKFPFQMDFTIPEGCGVLEKDTSVGEVYTELVKPLLDSPPV  
GGWSRVAEEKDALPVFHPSSAVPFEGGEKAALERLDDYVGHEDGKGWIGGGKAKQYKATRNMGIMEGFSTKFS  
CWLSLGLCLSAREIGWRVGGLLGKVDKDKDTYNNVYWIIFELLWRDFFQSTVYKYSLSKYSLFLPKGFSEQI  
NTYPRSQRPNPQEWHPNWNEDDPARRWCEGRTGVFPVDANMRELRETGWMSNRGRQNVASFLVKDLYVDWR  
VGAEFFEMHLVDYDTC SNWGNWQYQAGVGNDPRSSRQFNPLKQAKDYDPKNDYTKLWLSELKVLPTFPVQTPW  
LLDDNQKPKGYPVKPVVEQQTWHKFYPRGSHTSTHRHAGENTGQHDRGGGGHGHVRKEGRNGRDGHEDKRAHGRS  
DQGL

>Tribolium\_cas\_NP\_001076794.1\_cry\_2

MSGVVGDAGRASKGQDKHMHVWFRRGLRLHDNPSLREGLKGARTFRCVFVLDPWFAGSSNVGINKWRFLQCL  
EDLDRSLRKLNSRLFVIRGQPADALPKLFKEWGTTALTFEEDPEPFGGVRDHNLTTLQELGISVQKVSHTL  
YHLQDIIDRNGGRAPLTYHQFLAIACMGPPPQPEPPVTFNSLNGAHTPLTDDHDEKYGVPTLEELGFDTEGR  
LPPVWQGGESEALARLERHLERKAWVASFGRPKMTPQSLPSQTGLSPYLRFGCLSTRLFYQLTDLKYKIKK  
AFPPLSLHGQLLWREFFYCAATKNPNFDMIGNPICVQIPWDKNAEALAKWANGQTGF PWIDAIMTQLREEGW  
IHHLARHAVACFLTRGDLWLSWEEGMKVFEELLLDADWSVNAGMMWLSCSSFFQQFFHCYCPKFKGRKADPN  
GDYIRKYLPLVKNMPSQYIHEPWTAPQVQRAAKCIIGKDYSLPMVNHAAASRVNIQRMKQVYQQLSNYRNVD  
NSAKFKDGFQEQPNVTVGNPSRK

>Trichechus\_manatus\_latirostris\_XP\_004387710.1\_cryptochro

MAATVVTA AAAALAPASIDGASSVHWFRKGLRLHDNPALLAAVRGARCVRVYILD PWFAASSSVGINRWRF  
LLQSLEDLDRSLRKLNSRLFVVRGQPADVFPRLFKWGVTRLTTFEYDSEPF GKERDAAIMKMAKEAGVEVTE  
NSHTLYDLDRIIELNGQKPLTYKRFQAIISRMELPKKPVGSVTSQQMESCRAEIQENHDETYGVPSLEELGF

PTEGLGPAVWQGGETEAMARLDKHLERKAWVANYERPRMNANSLASPTGLSPYLRFGCLSCRLFYRYRLWDLY  
KKVKRNSTPPLSLFGQLLWREFFYTAATNNPRFDRMEGNPICIQIPWDRNPEALAKWAEGKTGFPPWIDAIMTQ  
LRQEGWIHHLARHAVACFLTRGDLWVSWESGVRVFDLLEDADFSVNAGSWMWLSCSAFFQQFFHCYCPVGFG  
RRTDPSGDYIRRYLPKLKGFPSPRYIYEPWNAPE SIQKAAKCIIGVDYPRPIVNHAE TSRLNIERMKQIYQQLS  
RYRGLCLLASVPSCAEDLSNPVAEPSLSQAGSMSSAGPRPLPSGPASPKRKLEAAEEPPGEELSKRARVAKLP  
SPELPSKDV

>Trichechus\_man\_XP\_004373851.1\_cry-1

MGVNAVHWFRKGLRLHDNPALKECIQGADTIRC VYILD PWFAGSSNVGINRWRFL LQCLEDLDANLRKLNSRL  
FVIRGQPADVFPRLFKWDITKLSIEYDSEPF GKERDAAIKKLATEAGVEVIVRISHTLYDLDKI IELNGGQP  
PLTYKRFQTLISKMEPLEIPEETITSEVIEKCTTPLSDDHDEKYGVPSLEELGFDTDGLPSAVWPGGETEALT  
RLERHLERKAWVANFERPRMNANSLASPTGLSPYLRFGCLSCRLFYFKLTDLYKKVKKNSSPPLSLYGQLLW  
REFFYTAATNNPRFDKMEGNPICVQIPWDKNPEALAKWAEGRTGFPPWIDAIMTQLRQEGWIHHLARHAVACFL  
TRGDLWISWEEGMKVFEELLLDADWSINAGSWMWLSCSSFFQQFFHCYCPVGFGRRTPNGDYIRRYLPVLRG  
FPAKYIYDPWNAPEGIQKVAKCSIGVNYPKPMVNHAEEASRLNIERMKQIYQQLSRYRGLGLLASVPSNPNGNG  
GLMGYSYPGENIPGCSSNGSCPQGNLILHYAHRDSQQAHL LKQGRSPTGTGVSSGKRPSQEEETQSIGPKVQRQ  
SAN

>Trichinella\_nati\_KRZ50806.1

MAESNVKTAIRQQQSMELYEKSIHLLNAKACNKRKGYVLYWVQASPRVKFNVALELACQKANEHQVPVLACFV  
FPTDKRLDNFPETERRCVFMLDGLRDFEKRLKKERNIDLVLVLYGKCEILIAKLAENCCEVVVDAGYMRYQNK  
WYDEVNNNIECRFTKVETNVVVPVELVSEKEEFAAYTIRPKIWKYAKQYLVEPECIMVIAKNKPLFSDNLPLI  
DLSQSDNVILAKLNADTTVKKVANIHGHHSEAVKLLNFVSKKLPNYDKLRNIPGLDGQSGLSPIYINFGHIST  
VEIILKVNASKANKSVKDAFVEQLLVRRELSINFVHYNSENYSCLKCLPKWAAETLKLQAKAKREYIYTSEQ  
EKGETHDQYWNACQLELVYEGKMNGYMRMYWGKKVIEWTANVTAYSWLMMYNDKYELDGRDPNGFAGVAVWF  
GKHDRHSSRRQIFGTLRYMNSSGLERKFKPHLKDYVKHCYELAGRSFPSSPVENSTPVTKKRKLKTTANVSR  
KVK

>Trichinella\_spi\_XP\_003381336.1\_photolyase

MAESNVKTATRQQQSMELYEKSIHLLNAKACNERGKYVLYWVQTSRPRVKFNVALELACQKANEHQVPVLACFV  
FPTDKRLDNFPETERRCVFMLDGLRDFEKRLKKERNIDLVLVLYGKCEILIAKLAENCCEVVVDAGYMRYQNK  
YDEVNNNIECRFTKVETNVVVPVELVSEKEEFAAYTIRPKIWKYAKQYLVEPECIMVIAKNKPLFSDNLPLID  
LSQSDNVILAKLNADTTVKKVANIHGHHSEAVKLLDNFVSKKLPNYDKLRNIPGLDGQSGLSPIYINFGHISTV  
EIIILKVNASKANKSVKDAFVEQLLVRRELSINFVHYNSENYSCLKCLPKWAAETLKLQAKAKREYIYTSEQ  
KGETHDQYWNACQLELVYEGKMNGYMRMYWGKKVIEWTANHTRKVMNNCAFMSMDKYELDGRDPNGFAGVAVW  
FGKHDRHSSRRQIFGTLRYMNSSGLERKFKPHLKDYVKHCYELAGRSFPSSPVENSTPVAKKRKLKTTANVS  
RKVK

>Trichobilharzia\_reg\_VDP97938.1\_unnamed\_pr

MVPAYQADTLRHFKFMIGGLAEVEQECLSLNIPFHLNAAEHGVNIEDVSSGCKFRWSDENALSNQTERIQTE  
FLYDENVATAVNLVKSLNIGCLITDFCPLRAPRSWIDAHNIVPVWCGSDKREYSARTIRTKLFAQSSVYLTE  
FPPIIKHPYTSENTPNPPPIIDWETVLSKYVGDKSVKPVDAIPGTQAGFNVLYKFIEKRLEKFDPHRSNVAN  
PALSGLSPWLHFGQISQRAVLEVVAVQKQYGRSADIFIECFNRRELADNFCFYTPMYDSIQDKRDPAYTKL  
QMENAQTADDLWNAAQRLVRKGMHWFRLQYWAKKILEWCAEGPEAAIQIAYVYLNDRYSLDGTDPNGYVGIM  
WAICGIHDQGWSERPIFGKIRYMNYKGASRKFSVPTFVARYPKNSVD

>Tricholaema\_leuc\_NXX38520.1

DNWAFLYAQRALQELPLHVCFLVPEFLGATIRHYSFMLKGLQEVAKECAELNVPFHLLLGyakDVLPAFV  
VEHGVGGLVTDFCPLRLPRQWVEDVKERLPEDVPFAQVDAHNIIVPCWVASPKQEYSARTIRGKIHAQLPEFLT  
EFPPIIRHPYTSSCLAQPIAWEVCYSSLQVDHTVKEVEWATPGTAAGLAMLQSFIAERLKSFGSHRNDPNKAA  
LSNLSPWFHFGQVSTQRAILEVQKHRDKYKDSVDVFVEEAVVRRELAENFCYNNENYDSVQGSAYDWAQTTLK  
LHVKDKRPFLYKLEELEHGTTDPLWNAAQQLQMVREGKMHGFLRMYWAKKILEWTRSPPEALQFAIYLNDRYE  
LDGRDPNGYVGLWSICGIHDQGWPERAIFGKIRYMNYAGCKRKFDVGQFERRYAPCT

>Tricholaema\_leuc\_NXX40960.1

MGVNAVHWFRKGLRLHDNPALRECIQGADTVRCVYILD PWFAGSSNVGINRWRFL LQCLEDLDANLRKLNSRL  
FVIRGQPADVFPRLFKWNIKLSIEYDSEPF GKERDAAIKKLATEAGVEVIVRISHTLYDLDKI IELNGGQP  
PLTYKRFQTLISRMPELEMPVETITPEVMAKCTSPVSDDHDEKYGVPSLEELGFDTDGLPSAVWPGGETEALT  
RLERHLERKAWVANFERPRMNANSLASPTGLSPYLRFGCLSCRLFYFKLTDLYKKVKKNSSPPLSLYGQLLW  
REFFYTAATNNPRFDKMEGNPICVQIPWDKNPEALAKWAEGRTGFPPWIDAIMTQLRQEGWIHHLARHAVACFL  
TRGDLWISWEEGMKVFEELLLDADWSVNAGSWMWLSCSSFFQQFFHCYCPVGFGRRTPNGDYIRRYLPVLRG  
FPAKYIYDPWNAPE SVQKAAKCIIGVNYPKPMVNHAEEASRLNIERMKQIYQQLSRYRGLGLLATVPSNPNGNG  
NGGLMSYSPGESISGCGSTGVFFFFFLLSASPGAQLGTGDGVQPCALGDSHTGASGIQQQGYCQASSILHYAH  
GDNQQPHLLQAGRPALGTGISAGKRPNPPEETQSVGPKVQRQSTN

>Tricholaema\_leuc\_NXX45725.1

MSHHTIHLFRKGLRLHDHPTLLAALRSSRRLYPVYILDLEFLSSAMRMGPLRWHFLLQSLEDLHRS LCQLGSC  
LLVIQGPYEAVLRDRVRRWSITQVTLD AEVEPFYREMEANIRCLGQELGFVLSLVGHS LYDTRKRVLDLNGGE  
PPLTYKRFLHILSL LGDPELPVPSITAEDFQSCQPPGPGAERFRVPLPADLEMPPELS PWRGGETEGLQRL  
EQHLTDQGWVTTFTKPRTPVNSLLPSTTGLSPYFSLGCLSVRTFFHRLAKICAQAKHHS LPPVSLQGQLLWRE  
FFYTVASATPNFSSMAGNPLCLQISWAQDAERLHRWKTAQTGF PWIDAIMTQLRQEGWIHHLARHAAACFLTR  
GDLWISWEEGMKVFEELLLDADYSINAGNWLWLSASAFCHRYRRILCPVRFGRRTDPEGHYIRKYLPI LKNFG  
SRHIYEPWTASEEEQKQAGCIIGRDYPPFMVNHEEVSDHNLQLMQQVREEQHRTAQLTRDDTEDSVELKVRPE  
HSEEDLPRGKVARVAE

>Tricholaema\_leuc\_\_NXX45837.1

KVDYDVC SNYGNWLYSAGLGNDPRDSRKFNM IKQGLDYDGN GDYVRLWVP ELQGIKGADIHTPWLSSADLSQ  
AGVTLGETYPQP VVTPPEWSRHISQRPQGRSPHPRGRGPTRRPVQHKDRGIDFYFPHKKDV

>Tricholaema\_leuc\_\_NXX46007.1

RFL LQSLEDLDNSLRKLN SRLFVVRGQPTDVF PRLFKEWGVTRLT FEYDSEPF GKERDAAIVKLAK EAGVEVV  
IENSHTLYDLDR IIELNGHKPPLTYKR FQAIISRMELPKKPVSTVISQQMETCKVDIQENHDDVYGVPSLEEL  
GFPTDGLAPAVWQGGETEALARLDKHLERKAWVANYERPRMNANSL LASPTGLSPYLRFGCLSCRLFY YRLWE  
LYKKVKRNSTPPLSLYQQLLWREFFYTAATNNPKFDRMEGNPICIQIPWDRNPEALAKWAEGKTGF PWIDAIM  
TQLRQEGWIHHLARH AVACFLTRGDLWISWESGVRVFDELLLDADFSVNAGSWMWLSCSAFFQ QFFHCYCPVG  
FGRRTDPSGDYVKRYLPKLKGFP SRYIYEPWNAPE SVQKAAKCIIGVDY PKPMVNHAETSRLNIERMKQIYQQ  
LSRYRGLCLLASVPSCVEDLSGPVTD SASGQGCSTSTATRLSQADQASPKRKHEGAEE LCAEELYKRPKVTGP  
PAAEVP GKSL

>Trichoplax\_adh\_XP\_002108560.1

MVCTVWLR YDLRLIDNPALFHA AKRGHVIIYILDQETPGKWKLGKASLWWLHHS LKSLQNDLLKFNIPLIL  
RRGADPLTILRQVLLQSRADAVYWNRCYEPYAVKRDQSIEEALKVDDVT VGSFQAGLLYEPWAVKSAKDEPFK  
LYIMYWNRLC LSSDQPRKPYDKPRFNNTLDIKVQTD TLD SWHLVSAKKDWKDELKIVIGCPGEDGAIRKLKEFI  
KYKLV DYRKGETVWPSKTSQLSTHLHFGEISPFV VWH TAKESVHLRSVPSDSSQKFLTELGW RDFCFHLLHY  
YPDFPEKSYKLNFDETIWKVDKEKLKLWQQGKTGYPIVDAGMRELLNTGVISYRVRTIVASF LTKHLLIPWQN  
GAEFWDTLVDADLALNSCSWQRITGCGADISSYFYIINPVTQGERFDS DGNVYRKWIPEIAKLSNDYIQQPW  
EAPAAVLKKAGIALGKTPKCI VNHKKARDVALTKFAPLKRQEPMDNLKKLPNKKKMKK

>Trichosurus\_vulp\_\_XP\_036603607.1

MAPKKRTHSASGEPEKME S QESKAKRKPLQRHQFSKSNMVQKEEDKREGEKRGGA EGLQEAVRQSRLQTAPSV  
LEFRFNKQVRVLISQDCHLQDRSQA FVYWMSRDQRVQDNWAFLYA QRLALKQKLPLHVCFLAPCFLGATIRH  
YDFMLRGL EEEVAEECEKLCIPFHLLGLPKDVLPAFVQTHSIGGIVTDFS PLLHHTQWVKDVQDALPKQVPFV  
QVDAHNI VPCWVASDKQEYGARTIRHKIHDRLP HFLTEFPVICH PYPYSNIAEPVDWNGCRAGLQVDRSVKE  
VSWAKPGTASGLTMLS FIAERLPYFGSDRNNPNKDALS NLSPWFHFGQVSVQRAILEVQKHSRYPDSVTNF  
VEEAVVRRELADNFCFYNK NYDKLEGAYDWAQTTLRLHAKDKRPHLYSLEQLES GKTHDPLWNAAQMQMVKEG  
KMHGFLRM YWAKKILEWTRSPEEAEFAIYL NDRFQLDGRDPNGYVGC MWSSICGIHDQGWAEREIFGKIRYMN  
YAGCKRKFDVAE FERKYS PAD

>Trichosurus\_vulp\_\_XP\_036617379.1

MGVNAVH WFRKGLRLHDNPALKECIEGADTVRCVYILDPWFAGSSNVGINRWRFL LQCLEDLDANLRKLN SRL  
FVIRGQPADVFPRLFKEWNI AKLSIEYDSEPF GKERDAAIKKLASEAGVEVIVRISHTLYDLDKI IELNGGQP  
PLTYKR FQTLISKMEPLATPVD TITPEVMHKCVTPVSDEHDEKYGVPSLEELGFDTDGLPSAVWPGGETEALT  
RLERHLERKAWVANFERPRMNANSL LASPTGLSPYLRFGCLSCRLFYFKLTDLYKKVKKNSSPPLSLYQQLLW  
REFFYTAATNNPRFDKMEGNPICVQIPWDRNPEALAKWAEGRTGF PWIDAIMTQLRQEGWIHHLARH AVACFL  
TRGDLWISWEEGMKVFEELLLDADWSINAGSWMWLSCSSFFQ QFFHCYCPVGFGRRTPNGDYIRRYLPVLRG  
FPAKYIYDPWNAPE SVQKVAKCLIGVNYPKPMVNHA EASRLNIERMKQIYQQLSRYRGLGLLASVPSPNPNNG  
GLMGYAPGENI PACSSSGGAPAGVSDGQILQACALPEPPTGASGVQQPGRSSLSGGGKRHRQEEEAQS IGPK  
MQRQSVN

>Trichosurus\_vulp\_\_XP\_036620822.1

MAATTVVTPAAAAATAPAPAPAPT PASAPEEGASSVHWFRKGLRLHDNPALQAALRGARCVRCVYILDPWFA  
ASSSVGINRWRFL LQSLEDLDISLRKLN SRLFVVRGQPTDVF PRLFKEWGVTRLT FEYDSEPF GKERDAAIVK  
MAKEAGVEVVTENSHTLYDLDR IIELNGQKPPLTYKR FQAIISRMELPKKPVSCVTSQQMERCQAEIQENHDD  
TYGVPSLEELGFPTDGLGPAVWQGGEMEALARLDKHLERKAWVANYERPRMNATSL LASPTGLSPYLRFGCLS  
CRLFYRLWEL YKKVKRNNTPPLSLYQQLLWREFFYTAATNNPKFDRMEGNPICIQIPWDRNPEALAKWAEGK  
TGFPWIDAIMTQLRQEGWIHHLARH AVACFLTRGDLWVSWESGVRVFDELLLDADFSVNAGSWMWLSCSAFFQ  
QFFHCYCPVGFGRRTPSGDYVRRYLPQLKGFP SRYIYEPWNAPE SVQKAAKCIIGVDY PKPIVNHAE TSRLN  
IERMKQIYQQLSRYRGLCLLASVPSCMEDLSNPMAETS VGQASGVSTGPKPLPCNPASPKRKLEAMEEASGEE  
HSKRARVMAALPVPELSGKV

>Trichuris\_tri\_CDW57984.1\_photolyase

MITHLVWFRQDLRLHDNLALAAACRNSSARVLALYIATPRQWATHNMSPRQAELINAQLNGLQIALAEKG IPL  
LFREVDDFVASVEIVKQVCAENSVTHLFYNYQYEVNERARDVEVERALRN LVCEGFDDSVILPPGAVMTGNHE

MYKVFTPFKNAWLKRLREGMPECVAAPKVRSSSGSIEPAPSITLNYPRQSFDTAHFVVEEKAAIAQLRQFCQNG  
AGEYEQQRDFPAVEGTSRLSASLATGGLSPRQCLHRLLAEQPQALDGGAGSVWLSELIWREFYRHLMTYYPSL  
CKHCFPIAWTDRVQWQSNPAHLQAWQEGKTGYPIVDAAMRQLNSTGWMHNRLRMITASFLVKDLLIDWREGER  
YFMSQLIDGDLAANNGGWQWAASTGTDAAPYFRIFNPTTQGEKFDREGEFIRRWLPPELRDVP GKVVHEPWKWA  
QKAVRPR

>Trinorchestia\_long\_KAF2350589.1

MSKSSLSSESQVLTHNVFSSRFLQCLEDDVNSLRNLNSRLFVVRGQPANALPQLFKEWNTTVLSFEEDPEPFG  
RARDASIIIGIAQEMGIEVIVRTSHTLYKLDKIIKKKGKPLTYKTFQNILAMMDPPAPPVAVIEASDLKNAY  
TPLQHDHDDKYGVPNLEHLGFETEHLPPAVWKGGETEALSRLKHHLERKAWVASFGRPKMSPQSLFACPTGLS  
PYLRFGLSARKFYTELNELYTKIKRVPAPVSLHGHLWREFFYTAATNNPKFDHMKGNPICVQIPWDKNPEA  
LAKWAHQGTGFPWIDAIMTQLRTEGWIHNVARHAVACFLTRGDLWVSWEEGMKVFDLLEDDADWSVNAGSWMW  
LSCSSFFQQFFHCYCPVRYGRKADPNGDFIRTYLPVLKNFPTKYIHEPWMAPEVSQCNARCIIGQHYPLPMVD  
HRTQSQNNIERMKQVYQQLAHYRANNNLALSPKCGASIRCTTLLETNTRCTALLDTNTRCTALLDTNTRCTALL  
DTNTRCTALLEASTRCTALLEASTRCTALLEASTRCTALLKASTRCTALLDTNIRCTALLNTNTRCTALLKAT  
AKTSNISSRDNVVHNASRNAKYTTSFLFLYN

>Trinorchestia\_long\_KAF2359012.1

MCRTQQTLLKPITSSAIKELETKAAPRLTANEKLHNPHSGVHKTLLESAKLTTEDPNVQLNSVRGILNTPAH  
TWPTALATPASNKRGETTNNEEDCQSPAELVLRSTVTWPVQDTKAKHHLAYTNLFKLNHISSYDLIPITPSTI  
SSYSNNQKPLNTLLVGDNILSTVKRNDIDTICRIQTISSALDRKMAVSMKKSGLQLMEEVHKNRKIKTAESIAD  
FKFCKQRVQVRSKSLDVPEKFSSIVYWMSREQRVQDNWALLFAQRLALKNRVPLKVVFCLVPSFMDATLRHYT  
FMIQGLKEVESDCKELGIPFHLLLGQAKDVLPSFVTSNDVGGVTDYSPLKTPKQWVADVLSNIPEDIPLCQV  
DGHNVVPVWEASPKQEYAARTIRRKITDKLSKYLTEFPPLIPHPHKDDKDKNKATDWKAVEASLDVDTSVGPV  
KWACGGTRSAFNMLASFCSERLKKFSEKRNDPNEDALSNLSPWIHFHGHISAARCVLEVQKQKGTSSSSVAAYV  
EECVIRRELSDNFCHYQPHYDSLGTSDWARITLDEHRKDKREKLYSLAQLDRAKTYDDLWNAAQVQLVTEGK  
MHGFLRMYWAKKILEWTPDPDSALAYALYLNDRYSLDGRDPNGFVGCLWSVGGLHDQGWREAVFGKIRYMNY  
AGCNRKMNIKAFVAKYKVTDMPGATNVKTSCLKVSTANTVSKKKPDELKGKEEESDAEEIQESPKKRAKKG  
RKMVSSASNDCK

>Tritonia\_tet\_AWY10934.1\_non-photor

MKEHNNITEDKIPQKKHVLFWFRKGLRLHDNPALFNAIEGALTYRCVYILDPWFAGASQVGINKWRFLLESLE  
DLDSLSRLKLNRLFVARGQPADVLPRLFQEWGITTLAFEEDSEPYGKERDAAISTMAREFHIQVISKSSHTLY  
NPRTVIAANGNNPPLTYKRQFQSI LSTLDPPDQPYETVSSHVVKKSATPVADDHDDRF SVPTLDELGFDTDSL  
PAKFQGGESEALARLHRHLERKAWVASFERPKMSPQSLYPSGTGLSPYLRFGLSPKTFYWKLTLEYKKVKKG  
IDPPLALHGQLLWREFFYTVSTNNPKFDRMVGN TICVQIPWEHNPEALAKWAEGMTGFPWIDAIMVQLRKEGW  
IHHLARHAVACFLTRGDLWISWEEGMKVFDLLEDDADWSVNAGMWWLSCSAFFQQFFHCYCPVGFGRADPS  
GDFVRQYLPVLKNMPTQYIYEPWTAPESVQKAAKCI VGKDYPLPMVAHAEQSRVNLERMHRVYKRLVLKSTAS  
KQIFLDLPKIPKVGMI LSKAKMFLSSSSDEEGSAKLRRQRKQLDSSAA

>Tritonia\_tet\_AWY11208.1\_photorecep

MDNNDTSNHVTIHWFRHGLRLHDNPALLEGLENCQEFYFVFIFDGSVAGTKNAGFSRMQFLLETCLKDLNNLK  
AKGSRLYVFKGDPEQVFKNIFEEWKVTRLTFEQDPEPIWQDRDNNVKDLCESLNVEWIEKVSHMLWDPHLIIQ  
ENGDTPLTYAMFCQVAEIVGLPPRPVEEPDFSEVTLPVSENHDLRFALPTMEDLGVAECAAAQKSPVCRYLG  
GETKALMLDLRLDKERLGFSGMQAQANQIYPDLTGMPSLSPLHFRGNLSIRKFYWALRDAYSEVNPSTCIP  
PEITSQLIWREYFYCMSVNNPYNRMKENPICLNIDWYSDDQGFEEKWDGKTGYPWIDACMRQLIQEGWIHQV  
CRHAVSCFLTRGDLWIDWQGLEVFDRHLLDADWSVCAGNWMWVSSSAFEKVLQCPRCICPVRYGRRIDPTGD  
YIRRYVPELKNMPLDYLFEPWKA PKDVQEKAGCVIGTNYPPMV DHRQASRDCKLKMEIIKGYKDI PHVAPA  
NEDEVISLSWMKMGPGKDYTC DHNHTDENHP

>Tritonia\_tet\_AWY11211.1\_6-4\_photol

MTQHRSIHWRKGLRLHDNPAFIKACEQASEIYPIFILDWPFAKSANCRVGINRWRFLQLALRDLNLSKLTN  
LRLFVVRGNPNTELENLCQRWKISRLTFEVDTEPYAVKRDEEVERQMGEMGIEVIKSLSHTLFEPQRVIKVNG  
GSAPLTYQRFQTIASKLGPPPKPLDAPTLLESLLGCKTLISDNHEKEFGVPTLTLELGDKPKSCGPLLYPGGEKE  
ALERMERQLKKTNWICSFEKPQTS PNSTLPSTTVLSPYLKFGCLSSRLFYHQ LADMYKGKHSQPPVSLHGQL  
LWREFFYTVASVTPNFDKMEGNPVC RQIPWQSNPDHLEKWANGQTGFPFIDAIMRQLRQEGWIHHLARHAVAC  
FLTRGDLWISWEEGMTVFEE LLDADWSLNAANWMLWSASAFFHQYFRVYSPIAFGKKTD PNGDYIRKYVPEV  
KKFPSKYIFEPWTAPLSMQQTAGCVLGKDY PKPLVDH SVASKANISKMAAAYNAAKDKLNNASQNGMTAQNG  
KKRKQNKDGLVQKKLFT

>Tritonia\_tet\_AWY11214.1\_cry\_dash

MLFHRNISRIFFARRQYISFSSMSSSTRVCIVLFRNDLRLHDNEALFLANKNC SHVLPLYCFDPRHFQGTYHY  
DLPKTGSHRAKFLLECVTDLKTNLQSRGSDLVVR LGKPENVIPELMAFN LGQD TVVVFQREVTD EEVKVEKG  
VKENSKLRVETVWGHTLHHVADLPFQPKDLDPDYTEFRKRVEGNTAVRQCFNLDPDKFKPLPSSVDTGTLLTLQ  
DLGLSVPETDPKSAFPFNGGETAALERLNNYLWGS DNVS TYKETRNGMIGSDYSTKFSSWLAHGCISPRKIYW  
EIKKYEQERTANQSTYWVIFELLWRDYFRYVAMKFGNQLFYSSGIKGGNVHWKKNMQHFKAWQEGKTGVPYVD

ANMRELAATGFMSNRGRQNVASFLTQDLQDLWRGLGAWEFESMLIDHDVCSNYGNWLYSAGIGNDPRENKRKFNV  
VKQGLDYDADGDYIRIWVPELRGLKSGKVHCIWTASKMIHDSAGISLGETYPYPIVMAPEWNRHVNRPTSSGA  
GTSRGGGAGKGPGRGQHSQSSGQKRGMDFYFKNSNPQ

>Trogon\_mela\_\_NXJ73608.1

DNWAFLYAQRLALKQELPLHVCFCFLVPKFLDATIRHYCFMLRGLQEVAKECAELNIPFHLLLGyakDVLpVfV  
EEHGVGGLVTDfCPLRLPRQWVEDVRERLPDDVPFAQVDAHNIVPCWVASSKQeYSAWtFRSKIHAQLpWfLT  
EFPPVIRHPYPPSCSAEPIAWEACYSSlQVDRTVKEVEWATPGTAAGLAVLQSFIAERLKSfASHRNNPNKAA  
LSNLSPWfHFgQVSTQRAILEVQKHQDKYKESVEVFVEEAVVRRElSENfCYNENYDSVQgAYDWAQTTLKL  
HAKDKRPYLYKLQELEQGTTHDPLWNAaQLQMVREGKMHGFLRMYWAKKILEWTRSpEEALQFAIYLNDRYEL  
DGRDPNGYVGKLQDWATGRGDLITDGQGCGLWSICGIHDHGwTERAVFGKIRYMNyAGCKRKfNVGefERRY  
APGD

>Trogon\_mela\_\_NXJ74995.1

RfLLQsLEdLDnSLRKLSSrLfVVRGQPTDVfPRLfKEWGVTRLTfEYDSEpFGKERDAAIVKLAKeAGVEVv  
IENSHTLYDLdRIIElNGHKpPLTYKRfQAIISRMELPKKpVSTVLsQQMETCKVDIQENHDDVYGvPSLEEL  
GFPTDGLAPAVWQGGETEALARLDKHlerKAWVANYERPRMNANSLLASPTGLSPYLRFGCLSCRLfYYRLWE  
LYKKVKRNSTPPLSLYGQLLWREffYTAATNNPKfDRMEGNPICIQIPWDRNPEALAKWAEGKTGFpWIDAIM  
TQLRQEGWIHHLARHAVACFLTRGDLWISWESGVRVfDELLLDADfSVNAGSWMWLSCSAffQqFFHCYCPVG  
FGRRTDPSGDYVKRYLPKLKGfPSRYIYEPWNAPEsVQKAACIIGVDYPKPMVNHAETsRLNIERMKQIYQq  
LSRYRGLCLLASVPSCVEDLSGPVTDsASaQGCSTSTVARLSQADQASPKRKHEGAEElCAEELYKRAKVTGL  
PAPEIPGKNL

>Trogon\_mela\_\_NXJ82119.1

MGVNAVHwFRKGLRLHDNPALRECIQgADTVRCVYILDPWFAGSSNVGINRWRfLLQcLEdLDANLRKLNSRL  
FVIRGQPADVfPRLfKEWNIAKLSIEYDSEpFGKERDAAIKKLASEAGVEVIVRISHTLYDLdKIIElNGGQp  
PLTYKRfQTLISRMELpEMPVETITPEVMEKCTTPVSDDHDEKYGVPSLEELGFDTDGLPSAVWPgGETEALT  
RLERHlerKAWVANFERPRMNANSLLASPTGLSPYLRFGCLSCRLfYfKLTdLYKKVKKNSSPPLSLYGQLLW  
REffYTAATNNPRfDKMEGNPICVQIPWDKNPEALAKWAEGRTGFpWIDAIMTQLRQEGWIHHLARHAVACFL  
TRGDLWISWEEGMKVFEELLLDADWSVNAGSWMWLSCSSfFQqFFHCYCPVGfGRRTDPNGDYIRRYLPVLRG  
FPAKYIYDPWNAPEsVQKAACIIGVNYPKPMVNHAeASRLNIERMKQIYQqLSRYRGLGLLATVPSNPNGNG  
NGGLMGYSpgESISGCGSTGGAQLGTGDGHTVVQPCALGDSHTGASGIQqQGYCQASSILHYAHGDNQqSHLL  
QAGRTALGTGISAGKRPNPEEEtQSVGPKVQRQSTN

>Trogon\_mela\_\_NXJ82491.1

KVDYDVCsNYGNWLYSAGVGNDPRDNRKFNVIKQGLDYDGNGDYVRLWVPELRDIKGADIHSPWALSRAALSQ  
AGVTlGETYPWPVvKAPEWSRHINQRRGRSPRPGGRRGPAHKDRGIDfYfSRKKDE

>Trogon\_mela\_\_NXJ84835.1

MPHRTIHLFRKGLRLHDNPtLLAALESSEVVYPVYILDRtFVTSAMHIGALRWHfLLQsLEdLRQNLcQLGSC  
LLVLQGEYEAVLRDHARRWEITQVTLDAETEPfYKEMeANIQRlGEELGFQVLSlVGHSlyDTRRIElNGGT  
PPLTYKRfLQVLSLLGDpKVpVRNLtAEDfQCKTPDPGLADCYRVPLPADLKIPPEsLSPWRGGETEGLQRLE  
QHLTDQGWVAsFTKpRTIPNSLLPSTTGLSPYfSLGCLSVRTFFYRLSNIYAQVRKHLRSfPSPSLMVfWMMR  
PAQVCSRVKARPLGfGVLCPLSGKLSCWRSFPACPLRRVPSVTLRLPAWfGLfFTTWLfqGRfSLSLPIPEGQ  
VFEELLLDADYSINAGNWMWLSASAffHQYTRIFCpVRfGKRTDPEGHYIRKYLPVLKNfASKYIYEPWMASE  
EEQKQAGCIIGQDYfPpMVNHKEASDHNlQLMKQVREEQQRtAQLTR

>Tupaia\_chin\_\_XP\_006157905.3

YILEPWFaASSSVGINRWRfLLQsLEdLDtSLRKLNSRLfVVRGQPADVfPRLfKEWGVTRLTfEYDSEpFGK  
ERDAAIMKMAKeAGVEVVTENSHTLYDLdRIIElNGQKpPLTYKRfQAIISRMELPRKpVGSVTSQQMEScRA  
EIQENHDETYGVPSLEELGFPTeGLGPAVWQGGETEALARLDKHlerKAWVANYERPRMNANSLLASPTGLSP  
YLRFGCLSCRLfYYRLWDLYKKVKRNSTPPLSLfGQLLWREffYTAATNNPRfDRMEGNPICIQIPWDRNPEA  
LAKWAEGKTGFpWIDAIMTQLRQEGWIHHLARHAVACFLTRGDLWVSWESGVRVfDELLLDADfSVNAGSWMW  
LSCSAffQqFFHCYCPVGfGRRTDPSGDYIRRYLPKLKGfPSRYIYEPWNAPEsVQKAACVIGVDYPRPIVN  
HAETsRLNIERMKQIYQqLSRYRGLCLLASVPSCVEDLNHPVAEPSSSQAGDRSSTGPRPLPSGLASPKRKLE  
AAEEPPGGELSKRARVAELPNPElPGKDV

>Tupaia\_chin\_\_XP\_006170414.1

MGVNAVHwFRKGLRLHDNPALKECIQgADtIRCVYILDPWFAGSSNVGINRWRfLLQcLEdLDANLRKLNSRL  
FVIRGQPADVfPRLfKEWNIITKLSIEYDSEpFGKERDAAIKKLATEAGVEVIVRISHTLYDLdKIIElNGGQp  
PLTYKRfQTLISKMEPLIPVETITSEVIEKCTTPLSDDHDEKfGVPSLEELGFDTDGLSSAVWPgGETEALT  
RLERHlerKAWVANFERPRMNSNSLLASPTGLSPYLRFGCLSCRLfYfKLTdLYKKVKKNSSPPLSLYGQLLW  
REffYTAATNNPRfDKMEGNPICVQIPWDKNPEALAKWAEGRTGFpWIDAIMTQLRQEGWIHHLARHAVACFL  
TRGDLWISWEEGMKVFEELLLDADWSINAGSWMWLSCSSfFQqFFHCYCPVGfGRRTDPNGDYIRRYLPVLRG  
FPAKYIYDPWNAPEGVQKvAKCLIGVNYPKPMVNHAeASRLNIERMKQIYQqLSRYRGLGLLASVPSNPNGNG  
GLMGYSpgDNTPGCSSSGSCSQSGSILHYAHGDSQqTHLLKQGRSSMGpGLSSGKRPSQEEDtQSIGPKVQRQ  
STN

>Tyto\_alba\_\_KfV57896.1

DNWAFLYAQRLLALKQELPLHVCFLVPKFLDATIRHYGFMLRGLQEVAEECTELNIPFHLLRGYAKDVLPAFV  
AKHDVAGAVGVEDIRERLPEYVPFVQVDAHNIIPCWVTSSKQEYTARTIRGKIHAQLPEFLTEFPPIVHHYP  
PSCPAEPISWEACYSSLQVDRTVKEVEWATPGTTTGLAVLQSFITERLKSFGSHRNDPNKAALSNLSPWFHFG  
QVSTQRAILEVQKHRDKYKESVDAFVEEAVVRRELAENFCYNNENYDSVQAYDWAQTTLKLHAKDKRPFLYK  
LQELEQGTTHDPLWNAAQLQMVQEGKMHGFLRMYWAKKILEWTRSPPEALQFAIYLNDRYELDGRDPNGYV

>Tyto\_alba\_\_XP\_009962599.3

MPHRTIHLFRKGLRLHDNPMLLAVLESSEVIYPVYILDRKFMVSMMHIGALRWHFLLQSLEDLQKNLCRLGSC  
LLVIQGEYESVLRDCIQKWNITQVSLDAEMESFYKEMEANIRRLGDELGVEVLTIVGHSLYDTRKILDLNGGT  
PPLTYKRFLHILSLLGDPEVPVRNLTAEDFQRCRPPDPGLAEFYRVPLPADLKIPLKSLSPWRGGETEGLQRL  
EQHLTDQGWWKSFTKPRITPNSLLPSTTGLSPYFSMGCLSVRTFFYRLSNIYAQAKHHSLLPPASLQGQLLWRE  
FFYTVASATPNFTKMAGNPICLQISWCEDAERLHKWKMAQTGFPPWIDAIMTQLRQEGWIHHLARHAVACFLTR  
GDLWISWEEGMKVFEELLLDADYSINAGNWLWLSASAFFHQYTRIFCPVLFQKRTDPQGQYIRKYLPIPKDFP  
SKYIYEPWTAPEEEQKEAGCIIIGHDYPFPMVNHKEASDHNLQLMKQVREEQYRTAQLTRDDTDDPMEMKVKRD  
HSEENISKGVAKMTERNEILSGITCWEPKNGRRGEPEAR

>Tyto\_alba\_\_XP\_042648484.1

MGVNAVHWFRLKGLRLHDNPALRECIQGADTIRCVYILDPWFAGSSNVGINRWRFLQCLELDANLRKLNSRL  
FVIRGQPADVFPRLFKEWNIAKLSIEYDSEFPFKERDAAIKKLASEAGVEVIVRISHTLYDLDKIIELNGGQP  
PLTYKRQTLISRMEPLEMPVETITPEVMEKCTTPVSDDHDEKYGVPSLEELGFDTDGLPSAVWPGGETEALT  
RLERHLERKAWVANFERPRMNANSLLASPTGLSPYLRFGCLSCRLFYFKLTDLYKKVKKNSSPPLSLYGQLLW  
REFFYTAATNNPRFDKMEGNPICVQIPWDKNPEALAKWAEGRGTFPPWIDAIMTQLRQEGWIHHLARHAVACFL  
TRGDLWISWEEGMKVFEELLLDADWSVNAGSWMWLSCSSFFQQFFHCYCPVGFGRRTDPNGDYIRRYLPVLRG  
FPAKYIYDPWNAPEISQKAAKCIIGVNYPKPMVNHAEEASRLNIERMKQIYQQLSRYRGLGLLATVPSNPNGNG  
NGGLMGYSPPGESISGCGGTGAQLGAGDGHTVVQPCALGEPQTGASGIQQQGYCQASSILHYAHGDNQQPHLLQ  
AGRMALGTGISAGKRPNPEEETQTVSGPKVQRQSTN

>Upupa\_epop\_\_NWU92594.1

MPHRTIHLFRKGLRLHDNPULLAALESSEVIYPIYILDRKFMTSVMHMGTLRWHFLLQSLEDLQKNLAQLGSC  
LLVVQGEYESVLRDHRVRRWDITQVTLDAEMEPFYKEMEANIRRLGEELGFVLSLVGHSLYDTRILDLNGGT  
PPLTYKRFLHILSLLGDPMVPVRNPATAEDFQSCRPEPEGLAERYAVPLPEDLKMPLESISPWRGGETEGLQRL  
EQHLTDQGWMVSFTKPRITPNSLLPSTTGLSPYFSLGCLSVRTFFYRLSNIYAQAKHHSLLPPVSLQGQLLWRE  
FFYTVASATPNFTQMTGNPICLQINWCKDAERLHKWKMAQTGFPPWIDAIMTQLRQEGWIHHLARHAVACFLTR  
GDLWISWEEGMKVFEELLLDADYSINAGNWMWLWLSASAFFHQYTRIFCPVRFGKRTDPEGRYIRKYLPIKLNFA  
SKYIYEPWTASEEEQKQAGCIIIGRDYPFPMVDHKEASDHNLRLMKQVREEQYRTAQLTRDDTDDPMEAKVKRD  
LVEENVSKVKVARMTE

>Upupa\_epop\_\_NWU92714.1

LQEWGVTRLTFEYDSEFPFKERDAAIKKLAKAEVGVVENSHTLYDLDRIIELNGHKPPLTYKRQAIISRM  
ELPKKPNTVISQOMETCKVDIQENHDDVYGVPVSLEELGFPTDGLAPAVWQGGETEALARLDKHLERKAWVAN  
YERPRMNANSLLASPTGLSPYLRFGCLSCRLFYRLWELYKKVKRNSTPPLSLYGQLLWREFFYTAATNNPKF  
DRMEGNPICIQIPWDRNPEALAKWAEKGTGFPPWIDAIMTQLRQEGWIHHLARHAVACFLTRGDLWISWESGVR  
VFDELLLDADFSVNAGSWMWLSCSAFFQQFFHCYCPVGFGRRTDPSGDYVKRYLPKLGKFPSPRYIYEPWNAPE  
SVQKAAKCIIGVDYKPMVNHAETSRLNIERMKQIYQQLSRYRGLCLLASVPSCVEDLTVPVTDSASQGCST  
ST

>Upupa\_epop\_\_NWV00793.1

MGVNAVHWFRLKGLRLHDNPALRECIQGADTIRCVYILDPWFAGSSNVGINRWRFLQCLELDANLRKLNSRL  
FVIRGQPADVFPRLFKVNAAAGHLNLPWHSLLPFPVLLLVPREEANTHLSTRASVVPCCCLTSFILFFQSRII  
ELNGGQPPLTYKRQTLISRMEPLEMPVETITPEVMEKCTTPVSDDHDEKYGVPSLEELGFDTDGLPSAVWPG  
GETEALTRLERHLERKAWVANFERPRMNANSLLASPTGLSPYLRFGCLSCRLFYFKLTDLYKKVKKNSSPPLS  
LYGQLLWREFFYTAATNNPRFDKMEGNPICVQIPWDKNPEALAKWAEGRGTFPPWIDAIMTQLRQEGWIHHLAR  
HAVACFLTRGDLWISWEEGMKVFEELLLDADWSVNAGSWMWLSCSSFFQQFFHCYCPVGFGRRTDPNGDYIRR  
YLPVLRGFPKYIYDPWNAPEISVQKAAKCIIGVNYPKPMVNHAEEASRLNIERMKQIYQQLSRYRGLGLLATVP  
SNPNGNGNGGLMGYSPPGESISGCGSTGGAQLGTGDGHTVVQPCALGDSHTGASGIQQQGYCQASSILHYAHGD  
NQQSHLLQAGRTALGTGVSAGKRPNPEEETQSVGPKVQRQSTN

>Uria\_aalg\_\_NXV41793.1

LLKVDYDVCSNYGNWLYSAGIGNDPRDNRKFNMIKQGLDYGNGDYVRLWLPELQGIKGADIHTPWALNGAAL  
SQAGVTLGKTYPQPVVTAPEWSRHINQRPQGQSPHPRGRRGPAHTPAQHKDRGIDFYFSRNKDV

>Uria\_aalg\_\_NXV42407.1

MQHSSIHWFRLKGLRLHDNPALLAAATDCCRLHPLFILDPSSSRVGANAQRFLLDALRDLDRGRLREMGSRFLFV  
RGCPPEEVFPRLFHAWGTTRLTFEVDTEPPARQRDAVAELAQAQHGVEVIREASHTLYDTERILALNNGKAPLT  
YKRLQSLLASLGPPEKPAPALTQEHLLQGCCTPCQVSHDIDYGVPTLEELGQDPTKVGPPLYPGGETAALARLD  
VHMERTAWVCSFKKPETEPTSLSPSTTVLSPYLKFGCLSVRTFWWRLDEVYQGGQRKHSQPPVSLHGQLLWREF

FYTAGASIPSFQDMVGNPICLQVDWDDNPQHRLRAWKEGQTGYPFIDAIMTQLRSEGWIHHLARHAVACFLTRG  
DLWVSWEEGLKVFEELLLDADWSLNAGNWLWLSGSAFFHRYFHVYSPITFGKKTDRDGAYIRKYL PVLKDFPA  
EYIYEPWKAPQAVQEQAGCLVGTHYPQPIVEHRAASKRNMGRMKAAR

>Uria\_aalg\_\_NXV42963.1

DNWAFLYAQR LALKQELPLHVCFC LVPKFLDATIRHYGFMLKGLQEVAEECAELNIPFHLLLG YAKDVLPTFV  
VEHGVGGLVTD FCLRLRPRQWVENVRERLPEDVPFAQVDAHNIVPCWVASPKQEYSARTIRGKIHAQLPEFLT  
EFPPIIRHPYPPSCPAEPIAWEACYSSLQVDR TVKEVEWATPGTSAGLAVLQSFITERLKSFSSSHNDPNKAA  
LSNLSFWFHFQGVSTQRAILEVQKHRGKYKESVDVFVEEAVVRRELAENFCYYNESYDSVQGAYDWAQTTLKL  
HAKDKRPFLYKLQELEQGTTHDPLWNAQLQMVQEGKMHGFLRM YWAKKILEWTRSP EEALQFAIYLNDRYEL  
DGRDPNGYARGRADVPSPCLAGCLWSICGIHDQGWAEARAI FGKIRYMN YAGCKRKFDVDQFERRYAPRT

>Uria\_aalg\_\_NXV44637.1

MGVNAVHWFRKGLRLHDNPALRECIQGADTVRCVYILDPWFAGSSNVGINRWRFL LQCLEDLDANLRKLNSRL  
FVIRGQPADVFPRLFKEWNI AKLSIEYDSEPF GKERDAAIKKLASEAGVEVIVRISHTLYDLDKI IELNGGQP  
PLTYKRFQTLISRMEPLEMPVETITPEVMEKCTTPVSDDHDEKYGVPSLEELGFDTDGLPSAVWPGGETEALT  
RLERHLERKAWVANFERPRMNANSL LASPTGLSPYLRFGCLSCRLFYFKLTDLYKKVKKNSSPPLSLYGQLLW  
REFFYTAATNNPRFDKMEGNPICVQIPWDKNPEALAKWAEGR TGFPWIDAIMTQLRQEGWIHHLARHAVACFL  
TRGDLWISWEEGMKVFEELLLDADWSVNAGSWMWLSCSSFFQ QFFHCYCPVGFGRRTPNGDYIRRYLPVLRG  
FPAKYIYDPWNAPESI QKAAKCIIGVNYPKPMVNHA EASRLNIERMKQIYQQLSRYRGLGLLATVPSNPNGNG  
NGGLMGYSPGESISGCGSTGGHLFPASPGAQLGTGDGHTV VQPCALGDSHTGASGIQQQGYCQASSILHYAHG  
DNQQSHLLQAGRTTLGTGISAGKRPNPEEETQSVGPKVQRQSTN

>Uria\_aalg\_\_NXV48596.1

RFL LQSLEDLDNSLRKLSSRLFVVRGQPTDVF PRLFKEWGVTRLTFEYDSEPF GKERDAAIVKLAK EAGVEVV  
IENSHTLYDL DRI IELNGHKPPLTYKRFQAI ISRMELPKKPVSTVMSQQMETCKVDIQENHDDVYGVPTLEEL  
GFPTDGLAPAVWQGGETEALARLDKHLERKAWVANYERPRMNANSL LASPTGLSPYLRFGCLSCRLFYRLWE  
LYKKVKRNSTPPLSLYGQLLWREFFYTAATNNPKFDRMEGNPICIQIPWDRNPEALAKWAEKGTGFPWIDAIM  
TQLRQEGWIHHLARHAVACFLTRGDLWISWESGVRVFDELLLDADFSVNAGSWMWLSCSAFFQ QFFHCYCPVG  
FGRRTDPSGDYVKRYLPKLKGFP SRYIYEPWNAPESVQKAAKCIIGVDYPKPMVNHAETSRLNIERMKQIYQQ  
LSRYRGLCLLASVPSCVEDLSGPVADSASGQGCSTSTAMRLSQADQASPKRKHEGAEELCAEELYKRAKVTDL  
PAPEIPGKSL

>Uria\_aalg\_\_NXV53482.1

MPHRTIHLFRKGLRLHDNPALLAALESSEVLYPVYILDRKFMA SVMHIGALRWHFLLQSLEDLQKNLRQLGSC  
LLVIQGEYESVIRDHVQKWNITQVTLDAEMEPFYKEMEAKIRCLGEELGF EVLSLVGHSLYDTKRILDNLGGT  
PPLTYKRFLHILSL LGDPEVPVRNLTAEDFQRCRSPDPVLAEGYRVPLPVDLKI PLESLSPWGGETEGLQRL  
EQHLTDQGWVASFTKPRTPVNSLLPSTTGLSPYFSMGCLSVRTFFYRLSNIYAQAKHHS LPPVSLQGQLLWRE  
FFYTVASATPNFTRMAGNPICLQISWYEDAERLHKWK

>Urocolius\_indi\_\_NXX75599.1

VLQEWNI AKLSIEYDSEPF GKERDAAIKKLASEAGVEVIVRISHTLYDLDKI IELNGGQPPLTYKRFQTLISR  
MEPLEIPVETITPEVMEKCTTPVSDDHDEKYGVPSLEELGFDTDGLPSAVWPGGETEALTRLERHLERKAWVA  
NFERPRMNANSL LASPTGLSPYLRFGCLSCRLFYFKLTDLYKKVKKNSSPPLSLYGQLLWREFFYTAATNNPR  
FDKMEGNPICVQIPWDKNPEALAKWAEGR TGFPWIDAIMTQLRQEGWIHHLARHAVACFLTRGDLWISWEEGM  
KVFEELLLDADWSVNAGSWMWLSCSSFFQ QFFHCYCPVGFGRRTPNGDYIRRYLPVLRGFP AKYIYDPWNAP  
ESVQKAAKCIIGVNYPKPMVNHA EASRLNIERMKQIYQQLSRYRGLGLLATVPSNPNGNGGGLMGYSPGESI  
SGCGSTGVCVFVFFFFFFPASPGAQMGTGDGHTV VQPCALGESHS GGASGIQQQGYCQASSILHYAHGASQQSH  
LLQAGRTTLGTGISAGKRPNPEEETQSVGPKVQRQSTS

>Urocolius\_indi\_\_NXX77873.1

MSHRTIHLFRKGLRLHDNP TLLAAVESSHVLYPVYILDRFVTSVMHIGALRWHFLLQS LQDLQKNLCQLGSC  
LLVLQGEYESVLKAHIQKWNITQVTLDAEMEPFYKEMESNVRR LGEELGFQVLALVGHSLYDTKRILDNLGGS  
PPLTYKKFLHILSL LGDPEVPVRNLTAEDFQRCRPPDPSLAECYRVPLPVDLNI PLESLSPWGGETEGLQRL  
EQHLTDQGWVAHFTKPKTIPNSLLPSTTGLSPYFSMGCLSVRTFFYRLSNIYAQAKHHS LPPVSLQGQLLWRE  
FFYTVASATPNFTRMVGNPICLQIPWYEDA EKLHKWKTAQTGFPWIDAIMTQLQ QEGWIHHLARHAVACFLTR  
GDWLWSWEEGMKVFEELLLDADYSINAGNWMWL SASAFFHQYTRIFCPVRFGRRTPDEGNYIRKYL PVLKNFP  
PKYIYEPWTAPEEEQKRAGCIIGQDYPPFMVNHKEASDHN LQLMKQVREEQHRTAQLTRDDTD DPM EAKLKRG  
HPEELSKGKVAKVME

>Urocolius\_indi\_\_NXX78149.1

RFL LQSLEDLDNSLRKLNSRLFVVRGQPTDVF PRLFKEWGVTRLTFEYDSEPF GKERDAAIVKLAK EAGVEVV  
IENSHTLYDL DRI IELNGHKPPLTYKRFQAI ISRMELPKKPVSTVISQQMETCKVDIQENHDDVYGVPSLEEL  
GFPTDGLAPAVWQGGETEALARLDKHLERKAWVANYERPRMNANSL LASPTGLSPYLRFGCLSCRLFYRLWE  
LYKKVKRNSTPPLSLYGQLLWREFFYTAATNNPKFDRMEGNPICIQIPWDRNPEALAKWAEKGTGFPWIDAIM  
TQLRQEGWIHHLARHAVACFLTRGDLWISWESGVRVFDELLLDADFSVNAGSWMWLSCSAFFQ QFFHCYCPVG  
FGRRTDPSGDYVKRYLPKLKGFP SRYIYEPWNAPESVQKAAKCIIGVDYPKPMVNHAETSRLNIERMKQIYQQ

LSRYRGLCLLASVPSCVEDLSGPVSDSASGQGCSSSTALRLSQADQASPKRKHEGAEEELCTEELSKRAKVTGL  
PASEIPGKSL

>Urocolius\_indi\_\_NXX82793.1

DNWAFLYAQRLALKQELPLHVCFLAPKFLDATIRHYGFMLRGLQEVAKECEELNIPFHMLLGYAKDVLPTFV  
VEHGVGGLVTDFCPLRLPRQWVEDVRQRLPEDVPFAQVDAHNIVPCWVASSKQEYSAWTFRGKIQTQLPEFLT  
EFPPVIHHPYPPSRPAEPIDWEACYSSLQVDHTVKEVEWATPGTAAGLAVLQSFISQRLKSFGAHRNNPNKEA  
LSNLSPWFHFGQVSTQRAILEVQKQRNKYKESVDVFVEEAVVRRELSNFCCYYNDKYDSVQGAYSWAQTTLKL  
HAKDKRPFLYKQLQELEQGTTHDPLWNAQLQMVREGKMHGFLRMYWAKKILEWTQSPEEALQFAIYLNDRYEL  
DGRDPNGYVGCLWSICGIHDHGWTERAVFGKIRYMNYAGCKRKFNVQDFERRYAPQT

>Urocolius\_indi\_\_NXX83306.1

KVDYDVCSSNYGNWLYSAGIGNDPRGNRKFNVIKQGLDYGNGDYVRLWIPELQGIKGADVHTPWALNSAALSQ  
AGVTLGKTYPPQPVVTAPEWSRHINQSLRERSPHPRGRTGPTHPTPVQRKQRGIDFYFSSKKAV

>Ursus\_mari\_\_XP\_008703869.1

MGVNAVHWFRKGLRLHDNPALKECIQGADTIRCXYILDPWFAGSSNVGINRWRFLQCLELDANLRKLNSRL  
FVIRGQPADVFPRLFKENITKLSIEYDSEFPFGKERDAAIKKLATEAGVEVIVRISHTLYDLDKIIELNNGQP  
PLTYKRFQTLISKMEPLEIPVETITSEVIEKCTTPLSDDHDEKYGVPSLEELGFDTDGLPSAVWPGGETEALT  
RLERHLERKAWVANFERPRMNANSLLASPTGLSPYLRFGCLSCRLFYFKLTDLYKKVKKNSSPPLSLYGQLLW  
REFFYTAATNNPRFDKMEGNPICVQIPWDKNPEALAKWAEGRGTFPWIDAIMTQLRQEGWIHHLARHAVACFL  
TRGDLWISWEEGMKVFEELLLDADWSINAGSWMWLSCSSFFQQFFHCYCPVGFGRRTPNGDYIRRYLPVLRG  
FPAKYIYDPWNAPEGIQKVAKCLIGVNYPKPMVNHAEEASRLNIERMKQIYQQLSRYRGLGLLASVPSNPNGNG  
GLMGYSPGENIPGCSSSGRRSSMSGSLSSGKRPSEEDTQSIGPKVQRQSTN

>Ursus\_mari\_\_XP\_040494929.1

MAAAVVTAAAVPTPAAGVDGASSVHWFRKGLRLHDNPALLAAVRGARCVRVCYILDPWFFAASSSVGINRWR  
LLQSLEDLDTSLRKLNSRLFVVRGQPADVFPRLFKEWGVTRLTFEYDSEFPFGKERDAAIMKMAKEAGVEVTE  
NSHTLYDLDKIIELNQGKPLTYKRFQAIISRMELPKKPVGSVTNQQMESCRADIQENHNDTYGVPSLEELGF  
PTEGLGPAVWQGETEALARLDKHLERKAWVANYERPRMNANSLLASPTGLSPYLRFGCLSCRLFYRLWDLY  
KKVKRNSTPPLSLFGQLLWREFFYTAATNNPRFDRMEGNPICIQIPWDRNPEALAKWAEKGTGFPWIDAIMTQ  
LRQEGWIHHLARHAVACFLTRGDLWVSWESGVRVDELLDADFVNAGSWMWLSCSAFFQQFFHCYCPVGFG  
RRTDPSGDYIRRYLPILKGFPSRYIYEPWNAPEAIQKAAKCIIGVDYPRPIVNHAEATSRLNIERMKQIYQQLS  
RYRGLCLLASVPSCVEDLNNPVAEPSSQTGSMSSAGPRPLPSGPASPKRKLEAAEEPPGEELSKRARVAELP  
APEPPSRDV

>Verrucomicrobia\_bac\_DASH\_family\_cryptochrome\_MBC7970164.1

MTQTKILLWYRSDLRSHDHEPLHTAVEKIQATSGQIVPFYCFDSRQFKQTAFGFPKTGAFRVQFLLESADLR  
RSLQALGSDLVVRQGLPEVVIPTLVKQLKLTAVYYHREVTSSEETAIETALQNALKPLGVAFKSFWGHTLFHPD  
DLPFELRQLPELFTFRKQVEKQSTVNPARRSPIQLPSLPDVEAGVLPPLTDLGLEPTYDDRAVLVFKGGET  
VGLARLNHYLWQHDCIKTYKETRNGMLGADYSSKFSFWLSLGLCLSPRYIYEQVQQYEQERVNDSTYWLIFEL  
LWRDYFRFICAKHGDRFLFRSGLQGIDIVWKEDWQRFDHWRGTTGFPPLVDANMRELSATGFMSNRGRQNVAS  
FLTKNLIGIDWRMGAEWFESLLLDYDVCSSNWNWNYTAGVGNDAARGFRFFNILKQSRDYPQGAYVKHWLPMLS  
NVPATKVHEPWKLLPVEQERFGIKIGVDYPNPLVDLFKSAAANEKIYNAAIETQ

>Verrucomicrobia\_bac\_HAL92164.1\_photolyase

MIHAARIHRMDNRPPARGKHILYWMQQAQRAEFNPALEYAVEQANALRLPVVAGFALTSFPEANRRHYQFMLE  
GLRETQKRLAARGIGFCIRPGPPEEVIPALAKNAALVVGDVGYLRVQRQWREAVAKHLACPFVLVETDAIVPV  
AEASDHAEFAARTLRPKIHRKLAEFLLSGKPPAVARPSLDLAKRSLSLDDPAAACRALGVDESVPSPDRLAGG  
LAAANKLLDRFIARRLADYATDASDPSLDGCSHMSPYLHFGQISPLDIALRVHASDAPRAATDAFLEQLIVRR  
ELSLNACWFNPAYDRYDALPAWSRKTLDRHRKDKREFIYSRAQWEAGATHDPCWNAQAEMVRSQMHNMYMRM  
YWGKKILEWSRTPEEAFETALHLNKNKYELDGRDPNGFTGVAWCFGLHDRPWTERAVFGNIIRYMNANGLRRKFD  
IEAYVERWLGPQTMSLF

>Verrucomicrobia\_bac\_NBU85991.1\_EBS13\_0151

KDIEKIFTSSFPKDAEGFFKIPTPLEEPAKIKNAPDDFSLTNISSHFPGEVHSVSSLKTKFSELGFLQATNEN  
AHFKGGETEALVRLECKVSSQTDYVNGFRKPKTSSTNLPLENPSTTGLSPYITVGSLSVRRLWQEEVEKANR  
QGPSSPPESLHGQLLFREMFYILSLSVPNWDSQDQNSMCKKINWGKNDKAKLSAWTDGQTGFPLIDALMRQL  
ETTGWMMHLGRHAVSCFLTRGQLWQHKTGRDVFDQKLLDSDWALNNANWLWLSGVAPFSMPYFRLYNPCPDG  
KSSLNVDTEANFIRHWVPELKNFPVKYIYEPHLAPPAVQEDAGCVIGKDYPEPMVDRKAVAKENLSQFKASL  
N

>Verrucomicrobia\_bac\_NCW27700.1\_photolyase

MSAPPVIVWFRDLRISDHTALHRAALEGVPLAPVVFDPAILSGSDVGIRRPALFLHACLASLMGNLQSVGSH  
LIVRKGRPEVELMALAKEIGAKKIFYNKDVEPYSRKRDKKVDQAAADCGIETVPCDDLLIHPGRVQRATGGP  
YTVFTPFSSRAWLSLPPQDPLPRPKQLVPIKGIKVADLPSPERFGLSPCDISLPPAGEKVARDMLRAFCAKNLR  
RYGEIRNYPLADATSRLSPHLRFGTISPRTVLAEARRVRAEDPSSRREVDIFIGELIWRDFYKQILWEFPFPHA  
TGSFRPEYDRVEWENDREKFATWCQGCTGFPIVDAAMRQLNQTGWMHNRLRMIVASFLTKDLLISWQWGERYF

MEKLFDGDLAANNGGWQWAAAGTGTDAQPYFRIFNPSSQAEKFDPEGKFIAQYVPEADLLTYPAPMVDHAKQRV  
RALEMYKKARS

>Vexillum\_par\_AQX17840.1\_putative\_p

MSKIGLHWFRYGLRLHDNPPLKAIKTC SKVIPLYILD TDYFKPDKVGINRIGFLDLTKALDSDLRAKGSRL  
FVAQGNPNFVIRNLIQEHKVELLSFERDTEPYNKHMDNNIIETAKSLNVETFPPLWGHMTMFDPEYLLEMSNGKA  
PLTMTSFLTLMSETGDPPKPLDPPESMPSPIDNLKCKDVFVYEGIPTLSDLKGFNFDPKDYTTWFVAGEKEAI  
KKMTEFLAQKHRVSTFEKPKTLPTALQPDTTALSPYITRGSLSRSLFYHSLKDTLKGMQSSKPPVSLKGQLYW  
REMayLIGFSVPNFNQMEGNPICKQIPWLTGEEAKSLLEKWEMGQTGYPAVDAMVNQLRTEGWMHHLARHLVA  
CYLTRGDLWVTWELGRDVFDDKHLVDADWSINNFSWHWLSCSAFFHQYFRCYSPVAFKKTDPNGNYIKKHVPI  
LAKFPDKYIYEPWTAPKGIQTACGCIIGKDYPKPMVDHKKFVSKENMDRMKKAYDAGKAKAKNSGEPPAKKLKQ  
NKLKGYAKK

>Vibrio\_cho\_WP\_076008192.1

MSKIGLYWFTNDLRLNDNPILLEQASQQVDRLICLYCYP SITPFLARYAQQTQWGEAKKRFLNQTLADLDHSL  
STLGQKLWVTPLLPYQALRHLLTQVEITDIYVDAMAGSDERQAIARIHQDFSSVHIHQQALHSLSEPQLPFA  
LEALPSTFTQFRKQVETLSLSSAPIGYPRVLPPIEQGWQLPLMDIVTEPNHSAFVGGEQAGLTHCQH YFSSML  
PSRYKETRNLGDGMDYSTKFSPLWALGAVSPKTIYAMLQRYEAVHGANDSTYWIFFELLWREYFYWYARRYGA  
KLFRFSGIGEEKPLTSFYAQRF LQWKHGETFPPIVNACMRQLNQTYGMSNRGRQLVASCLVHELGLDWRYGAA  
YFETQLMDYDVGSNWGNWQYLAGVGADPRGSRQFNLAQKAHTYDPKGEFVAKWCGTDCGKLNALENLTLDSDV  
MVDWPIAASASLFIHHPKNKESSS

>Vibrio\_cho\_WP\_148537779.1\_photolyase

MRLVWFRDLRSFDNTALTAALNSGDPVAA MYIATPEQWHQHHLAPIQADLIWRR LAELQQELAALNVPLFYQ  
QVADFQAAAVAVS QLAKTLNATQVLANRDYELDEQQRDQSAQQLLAEQGITWSAFDDKCVLP PPGSVRTKQGEF  
FKVFTPFKRAWLT L FQPPVIGKNRPAALWDVPSALAEVWVHPEQTFDYPRIDSMPWAADFETVRAQLRDFCRE  
RVQDYHQARDFPAQEGTSSLSPYLAIGVLSARQCVARLYRESSMGELSEGAQVWLSELIWREFYQHLVAIEPN  
LSKSRDFVEWGARLEWWDNEKFQLWCEGKTGYPIVDAAMRQLNQTGWMHNRLRMIVASFLTKDLHIDWRWGE  
RYFMSRLIDGDY AANNGGWQWCASTGCDGQPYFRIFNPVSQGEKFDPNGDFIRRVVPELRSVSSAYIHQPW TY  
PAVNSVLYPARLVDHKQEREVT LRLYKTAKG

>Vitrella\_bra\_CEM03182.1\_unnamed\_pr

MPEGLTKAQKKNQKRKQKRDEQRPQT TAIVWLREDLRLHDNPALHQATQCGAIVIPVYIKDES DPSPWPLRGA  
ALYWKYWSLKCFDNLRGCGSRLTLRRGDALATIAQLAADTGATSVYWN RACEPWNVERDEHVKESLQMNGIQ  
VHDFKGVVLYEPWEANPDDNAHRAGFGSVGFRAACERLGEPSKPLPAVEK LKAPLLWPASLTVD DLGYQRM P  
VRKGGEVVDWAASIRQRWEFGEAGALRALDEFITSDASQKFESRQRFRADRKWTAQISPYVRFGELSSRLIYW  
EAKRRIGHNCQT FIRRLFWRDLAYWTLWKFPSCHT EPLRPQYAHQRWGTDA AALKKWQRGR TGFP LVDAA MRQ  
LWAIGWMPNYLRHV VAGFLVEYMNMHWFEGFKWFDYTLVDSDVAINAYMWQNGGHSGLDQWNFVMHPVYAAKS  
CDPEGNYVRQWVPELRHLPVEYVHCPWEAPVTL LASARVLLGRDYYRRTIDDLAARRNSHKAVIEVREGVGK  
PYVLACGNEKMQLPDGRWVRLITRIDYRMMAANPVTVQTAADAWN KSKRRLLDQMSLALADEQRIYHQSHPD A  
DEEEKADL

>Vitrella\_bra\_CEM04076.1\_unnamed\_pr

MGKSAVLWFRKGLRLHDNLALLEACKDATHVYPVFIIDPHFVGPGKVG VGNRYRFLLECLTDLDTS LKTKYNSR  
LIVLRGNPLDVMRSL LKDKQPF AVDKLCYEFDSEPYARS RDAEVT KIAKEGGVEVTVSPGH TLFDLDEILKKF  
KGTPPLSYGPFVKMVESIGPPQTDKDAPAAIPAPPAAVLGK VDESYSVPTLQEMGCEETPHNGVLRGGETVGL  
QRLHDVTRNEKWIATFEKPKTKPTDFNPASTTQMSPYMKFGCVSARKFYHLLAIYKRHKGHSQPPVSL LGQL  
YWREFFYTVGYATNNYDRMAGNKICRQIAWVNNEEWIEAWQQGKTGYPWIDAAMRQLRREGWMHHLARH AVAC  
FLTRGDLFCSWEVGAKTFDELLIDADWSINNGNWMWLS CSCFFYQFFRIYHPSTFAKKYDPTGAYVRRYVPEL  
RHMPDKYVYEPWKAPKAVQEEAKCII GQDYPEPIVDHAEASQECKDRMKAAYDEHKAIKRAPKSEM KPD PDDE  
EEDDEEGEEEDDEDYSIYKPLDGTNKR SRKGKKASPKKKT KA

>Vitrella\_brassi\_CEL93225.1

MLLSLLTVS IARGAGVVSMS SGKEGKRKNEPSAAAASSAAGGGEAFKRARPEDVKFEEKRCRELNEVKVSSAG  
DGAVLYWMSRDQRVQDNWALIKAQRLAIERN TALYVSFCLVPRFLEAAYRQYAFMIKGLKEVESEL RDLNIPF  
HLLIGFAKDALPPFIQQHRISVVVTD FSPVRVPMQWYRDVAASLEQSGVPLIQVDAHN VVPLWVTSSKQ EYGA  
RTIRGKIQGVLSHYLTQFPVKGHPIAPPEGAF AEPFDLQATLDSLEVDREVGEVDWATPGTSAGLAMLEDFC  
RNRLKMFADSRNDPTKNSLSNLSPWIHFGQISVQRCVLDVQAYVRANPSPALSKGKEAYVEEAVVRRELSDNF  
CFYNPNYSIEGAADWAKQSLELHKKDKREYIYTRDEFAAGKTHDDLWNAQLQM VQEGKMHGFLRMYWAKKI  
LEWSPSP EEAALATAIYLN DKYELDGRDPNGYVGC MWSIAGIHDQGWAERSVF GKIRFMNYAGCQRKFVDDFV  
RKYPKAAANAREANAKKPGALNFPKAK

>Vitrella\_brassi\_CEL94135.1

MAAFLPSPPLRLQRLSAAARSTSPSLQLRAASDKAATPGSARHRVVVWFRNDLRLHDHPGLSTAIEQVRR LGAD  
KAEVLPVFCIDPRQFGISEWGS PKTGIFRARFLVESVADLKRQLRGLGSDLLVAIGQPETILPELATLPSEKG  
QPERATVVASEEVTSEETAVQDAVRRNLR SQKAELSLHWSSTLHHIDDIRSIFDRDLRTMPTVFTPFRTKVEA  
RLLPGATLPTPQQGDVGAAPKIDLT KACLDASFDLVPRVEDLPWAGGRPPEAHSWSQPAVLDFRGGEEEG LKR

LSHYVWSDHIATYFDTRNGMLGADYSSKLSPWLAHGCLSPRRIYEEVAKYESERVKNKSTYWLVFELLWRDYF  
RFFALKNGRRVFQQRGIAFTSPPPPIRQDGKAEELLDWKNQGTGVPLVDANMRELAATGFMSNRGRQNVGS  
FLALDLCLDWRYGADHFESLLLDYDVCNWNWVAIAGRIGGRLNRFNIPRQARTYDPQGEYVRVWCPELRNV  
PTEYIFEPWTMPASVQQSGCVIGVDYPQCVVGANHWPPSSASGGGRAARPPRSPSGRGRGGKKGRVAR  
>Vombatus\_ursinus\_XP\_027693622.1\_cryptocho  
MAATTVVTVPAAAAAPAPAPAPAPAPAPAPAPTPTPAPAQAPAPTAPAPAQAPAPAPAPEEGASSVHWFRKGLR  
LHDNPALQAALRGARCVRCVYILDPWFAASSSVGINRWRFLQSLLEDLDISLRKLNSRLFVVRGQPTDVFPRL  
FKEWGVTRLTFEYDSEPFGKERDAAIVKMAKEAGVEVVVTENSHTLYDLDRIIELNGQKPPLTYKRFQAIISRM  
ELPRKPVSCVTSQQMERCQAEIQENHDDTYGVPSLEELGFPTDGLGPAVWQGGEMEALARLDKHLERKAWVAN  
YERPRMNATSLMASPTGLSPYLRFGCLSCRLFFYRLWELYKKVKRNNTPPLSLYGQLLWREFFYTAATNNPKF  
DRMEGNPICIQIPWDRNPEALAKWAEKGTGFPWIDAVMAQLRQEGWIHHLARHAVACFLTRGDLWLSWESGVR  
VFDELLLDADFSVNAGSWMWLSCSAFFQQFFHCYCPVGFGRRTPDPSGDYVRRYLPQLKGFPSTRYIYEPWNAPE  
SVQKAAKCIIGVDYPKPIVNHAETSRLNIERMKQIYQQLSRYRGLCLLASVPSCMEDLSNPMMAETSMGQASGV  
SSTGPKPLPCSPASPKRKLEAMEEASGEEHSKRARVMAALPVPELAGTV  
>Vombatus\_urs\_XP\_027701119.1\_photolyase  
MAPKKRSHSTSSEPEKMESQESKAKRKPLQKHQFSKSNMVQKEEEDKREGEKRGGAEGLHEVVQRSLRTAPS  
VLEFRFNKQVRRLISQDCHLHDQSQAFVYWMSSRDQRVQDNWAFLYAQRLALKQKLPLHVCFCCLAPCFLGATIR  
HYDFMLRGLLEEVAEECQKLCIPFHLLGLPKDVLPAFVQTHGIGGIVTDFSPLLHHTQWVKDVQDALPRQVPF  
VQVDAHNIIVPCWVASDKQEYGARTIRHKIHDRPLPHFLTEFPVICHYPYPSNIQAEPPVDWNGCRAGLQVDRSVK  
EVSWAKPGTASGLTMLQSFIARLPYFGSDRNNPNKDALSNLSPWFHFGQVSVQRAILEVQKHSRYPDSVTN  
FVEEAVVRRELADNFCFYKNYDKLEGAYDWAQTTLRLHAKDKRPHLYSLEQLESKTHDPLWNAQMOMVKE  
GKMHGFLRMWAKKILEWTRSPREEALEFAIYLNDRFQLDGRDPNGYVGCMMWSICGIHDQGWAEREIFGKIRYM  
NYAGCKRKFDVAEERKYSSAD  
>Vombatus\_urs\_XP\_027728959.1\_cry-1\_X1  
MGVNAVHWFRLRLHDNPALKECIEGADTVRCVYILDPWFAGSSNVGINRWRFLQCLELDANLRKLNSRL  
FVIRGQPADVFPRLFKEWNIAKLSIEYDSEPFGKERDAAIKKLASEAGVEVIVRISHTLYDLDKIIELNGGQP  
PLTYKRFQTLISKMEPLATPVETITPEVMHRCVTPLSDEHDEKYGVPSLEELGFDTDGLPSAVWPGGETEALT  
RLERHLERKAWVANFERPRMNANSLASPTGLSPYLRFGCLSCRLFYFKLTDLYKKVKKNSSPPLSLYGQLLW  
REFFYTAATNNPRFDKMEGNPICVQIPWDRNPEALAKWAEGRGTGFPWIDAIMTQLRQEGWIHHLARHAVACFL  
TRGDLWISWEEGMKVFEELLLDADWSINAGSWMWLSCSSFFQQFFHCYCPVGFGRRTPDNGDYIRRYLPVLRG  
FPAKYIYDPWNAPEGVQKVAKCLIGVNYPKPMVNHAEEASRLNIERMKQIYQQLSRYRGLGLLASVPSNPNGNG  
GLMGYAPGENIPACSSSGGAPVGASDGQILQACALPEPPTGASGGQQPGYSQSGSISHYSHEDSQQTYMLKQ  
GRSCLGGGKRHRPEEETQSVGPKMQRQSVN  
>Vulpes\_vulp\_XP\_025859913.1  
MAAAVVTAAAAAPVPTAGVDGASSVHWFRKGLRLHDNPALLAAVRGARCVRVYILDPWFAASSSVGINRWRFL  
LLQSLLEDLDTSRLKLNSRLFVVRGQPADVFPRLFKEWGVTRLTFEYDSEPFGKERDAAIMKMAKEAGVEVVTE  
NSHTLYDLDKIIELNGQKPPLTYKRFQAIISRMELPKKPVGSVTSQQMESCRADIQDNHDDTYGVPSLEELGF  
PTEGLGPAVWQGGETEALARLDKHLERKAWVANFERPRMNANSLASPTGLSPYLRFGCLSCRLFFYRLWDLY  
KKVKRNSTPPLSLFGQLLWREFFYTAATNNPRFDRMEGNPICIQIPWDRNPEALAKWAEKGTGFPWIDAIMTQ  
LRQEGWIHHLARHAVACFLTRGDLWVSWESGVRVFDELLLDADFSVNAGSWMWLSCSAFFQQFFHCYCPVGFG  
RRTPDPSGDYIRRYLPILKGFPSTRYIYEPWNAPEIQKAAKCIIGVDYPRPIVNHAETSRLNIERMKQIYQQLS  
RYRGLCLLASVPSCVEDLSNPVAEPSSSQTGSMSSAGPRPLPSGPASPKRKLEAAEEPPGEELSKRARVAELP  
TPELPCRDV  
>Vulpes\_vulp\_XP\_025866721.1  
MGVNAVHWFRLRLHDNPALKECIEGADTIRCVYILDPWFAGSSNVGINRWRFLQCLELDANLRKLNSRL  
FVIRGQPADVFPRLFKEWNIATKLSIEYDSEPFGKERDAAIKKLATEAGVEVIVRISHTLYDLDKIIELNGGQP  
PLTYKRFQTLISKMEPLIPVETITSEVVEKCTPLSDDHDEKYGVPSLEELGFDTDGLPSAVWPGGETEALT  
RLERHLERKAWVANFERPRMNANSLASPTGLSPYLRFGCLSCRLFYFKLTDLYKKVKKNSSPPLSLYGQLLW  
REFFYTAATNNPRFDKMEGNPICVQIPWDRNPEALAKWAEGRGTGFPWIDAIMTQLRQEGWIHHLARHAVACFL  
TRGDLWISWEEGMKVFEELLLDADWSINAGSWMWLSCSSFFQQFFHCYCPVGFGRRTPDNGDYIRRYLPVLRG  
FPAKYIYDPWNAPEGIQKVAKCLIGVNYPKPMVNHAEEASRLNIERMKQIYQQLSRYRGLGLLASVPSNPNGNG  
GLMGYSPGENIPGSSGSCSQSGSILHYAHGDSQQTHLLKQGRSSVGTGLSSGKRPSEEDTQTIIGPKVQRQ  
STN  
>Walleimia\_ichthy\_XP\_009268143.1  
MPARVLHWFRTDLRLHDAPALLKGLELKPEVFFPVWTDWDPYFNFECPVGNRYKFLTESMKEIDKKLSKMGNK  
LHVFRAPADLFPVLFKQWNITHLVYEKDPAPYAIERDESIKKLAKDANVEVLDITGHTLYDIDAIVEKQKKGK  
TITSATAFKAAAKDMKIERPLQAPKDVPAKADDLKLDAIKKEVKKVKSDDHVNNEHRKGKMTAYDSVTGPKDSL  
EPPSLEELGLDSEDATTQIPGGEDEALRRLDKWKDKDATATFRKPQTSPSEYDPPATTQLSPYIKFGALGVR  
EFYWRVVDLMENYDGETSSEPENLPGQLIFREMYFAAQLGIGKPFQIRGNKICRVIDWKLCNAYDEDGEKIF  
PRPKGSKEDEEALWKHNGTGFPPWVDAAMRQLKQEGWMHHLARHCVAGFLTRGQLYISWERGAEVFDRYLVD

QDPASNAGNWMWLSCSAFFHQYYRNYGMTTFPSKYDKTGKLVKRYVPELKEYPDKYIYKPWEAPEDVQKKAGC  
KIGKDYPEPMIDEKEANKECMARMKEQYAKKLYGDSLLKRKAK  
>Wallemia\_ich\_XP\_009266014.1\_photolyase  
MGNLKKEPSSPIQEAGVKRAATRSPSPHLHENKKQTQEKIKKEENLGGYPSYGRVKACSIADRIDENPPVL  
RLNKAIQERTKQAHSDDEKSVVFWMRMHLRIVDSRGLTIAYEYAKEHNIPLIIHVFSPODYEAHDRSCRRI  
DFVLRKLKLSLKEELEEMNIPLYTFTVEQRQHIPPQKVIDFVKQYNSKHLYGNIEYEIDELFRDMLINLANEQE  
VEVQLEHDNMVPPFKVLTKTTSKPPMTFTAYLKGWQKIVLEDPTHRETERIGANNISAKEDYKALFEKQVP  
DEIAGFECHDKDKMRELWPVGRTTASEILDRFLHYKNREEATESTPLGEGAEEKDDNSRIKQYADGRNITTGE  
TTSKISPYLASGQISVRQCFNRAQKLKSGYNMDITRESGVGMWSQEVWIKDFYQNVLCVQPRVSMGHPFLRQY  
RFVEWEYNQEHLDAAHWQKGTGWPIVDAAMRQLTTTGWMHNRMRMTVASYLCKDLMLDWREGERIFAKELIDHD  
LGSNNGGWQWSAGTGTDAQPYFRIFNPISQSQKADPSGEYIHHWLPELTDIKPPALFEPKHLKNEFQKLN  
PKPLVDHKFARDRALSRKALGKE  
>Xenopus\_lae\_NP\_001081129.1\_cry-1  
MGVNAVHWFRKGLRLHDNPALRECIQGADTVRCVYIILDPWFAGSSNVGINRWRFLQCLELDANLRKLNSRL  
FVIRGQPADVFPRLFKWKITKLSIEYDSEFPFKERDAAIKKLASEAGVEVIVRISHTLYDLDKIELNGGQP  
PLTYKRQFQTLISKMDPLEIPVETITAEVMEKCTTPVSDDHDEKYGVPSLEELGFDTEGLPSAVWPGGETEALT  
RLERHLERKAWVANFERPRMNANSLLASTTGLSPYLRFGCLSCRLFYFKLTDLYKKVKKNSPPLSLYGQLLW  
REFFYTAATNNPRFDKMDGNPICVQIPWDRNPEALAKWAEGRTGFPWIDAIMTQLRQEGWIHHLARHAVACFL  
TRGDLWISWEEGMKVFEELLLDADWSVNAGSWMWLSCSSFFQQFFHCYCPVGFGKRTDPNGDYIRRYLPILKG  
FPPKYIYDPWNAPEQVQKAAKCIIGVNYPKPMVNHAEEASRLNIERMKQIYQQLSRYRGLGLLASVPSNPNGNG  
GLMSYSPGESMPGCSNNGGGQMGAEIGSSASNPNNQGEVLPGTSGLQGYWQGSSILHYSHSDNQSYLMQAR  
NPLHSVVSSGKRPNPEEETQSVGPKVQRQSTH  
>Xenopus\_lae\_NP\_001081421.1\_6-4\_photol  
MRHNSIHWFRKGLRLHDNPALLAAMKDCALHPIFILDWPFKPMQVSVNRWRFLIDALKDLNKKINSRL  
FVVRGKPAEVFPLLFKKWKVTRLTFEVDIEPYSRQRDAEVEKLAEEHDVQVIQKVSNTLYDIDRIIAENNGKP  
PLTYVRFQTVLAPLGPFRPIKAPTLENMKDCHTPWKSSYDEKYGVPTLEELGQDPMKLGPHLYPGGESEALS  
RLDLHMKRTSWVCNFKKPETEPNSTPTVLSYVFKGCLSAFTFWWKIADIYQGGKHSPPVSLHGQLLWR  
EFYTTGAGIPNFKMEGNPVCVQVDWNNKEHLEAWSEGRGTGYPFIDAIMTQLRTEGWIHHLARHAVACFLT  
RGDLWISWEEGQKVFEELLLDADWSLNAGNWLWLSASAFFHQFFRVYSPVAFGKKTDKNGDYIKKYLPIILKKF  
PAEYIYEPWKSRSRSLQERAGCIIGKDYPKPIVEHNVVSKQNIQRMKAAYARRSGSTEGVDKDSGQNNKKGGKR  
KVAAGTSVAELFKKK  
>Xenopus\_lae\_NP\_001084438.1\_cry\_DASH  
MCVPSRVIICLLRNDLRLHDNEVLHWAHRNADQIVPLYCFDPRHYVGTHYFNFPKTGPHRLKFLLESVRDLRI  
TLKKKGSNLLLRGKPEEVIEDLVKQLGNVSAVTLHEEATKEETDVESAVKQACTRLGIKYQTFWGSTLYHRE  
DLPFRHISSLPDVTYQFRKAVETQGKVRPTFQMPDKLKLPSGLEEGSVPSHEDFDQDPLTDPRTAFFPCSGG  
ESQALQRLEHYFWETNLVASYKDRNGLIGLDYSTKFAPWLALGCVSPRYIYEQIGKYEKERTANQSTYVWIF  
ELLWRDYFRFVALKYGRRIFFLRGLQDKDIPWKRDPKLFDAWKEGRTGVFPVDANMRELAMTGFMNSNRGRQNV  
ASFLTKDLGIDWRMGAWEFYEYLLVDYDVCNNGNWLWLSAGIGNDPRENKRFNMKIQGLDYDSGGDYIRLWVPE  
LQQIKGDAHTPWALSASLANHANLSLGETYPYPIVMAPEWSRHINQKPGASWEKSARRGKGPSHTPKQHKNR  
GIDFYFSRNKDV  
>Xenopus\_lae\_NP\_001089127.1\_CPD\_photol  
MSHKGKQSKPKDGESGSEKSDGSQKKGMDIAKTQITITKSPGKRKIPGKVLSDSSGDSSGVDAKKKKTMVE  
QKGEKDVREAVKISRMAAAPSVSEFKFNKKRARLLSTEADLKEDAQGIVYWMSRDQRVQDNWAFLYAQRLALK  
QKLPLHVTFCVLVPKFLDATIRHYGFMLKGLQEVAAECKELNIPFHLLIGYAKDILPNFVKDHAIGGVVTDSP  
LRVPLQWVEDVGKCLPEDVPLVQVDAHNIVPCWVASIKQEYGARTIRRKVHDQLSQFLTEFPPIKHPYEPKF  
EAETVDWDKCYKSLEVDRTVGEVEWAKPGTNAGFNVLQSFISERLKHFNSDRNNPNQNALSNLSPWFHFGQLS  
VQRAILEVQKYRSKFESVDSFVEEAVVRRELADNFCFYKNKYDKIEGAYDWAKNTLKDHAHAKDRTHLYTLEK  
LEAGKTHDPLWNAQLQMVHEGKMHGFLRMYWAKKILEWTSSPEEALHFSLYLNDRYELDGRDPNGYVGCMMWS  
ICGIHDQGWAERAVFGKIRYMNYQGCKRKFDVAQFERRYHPPKFSQ  
>Xenopus\_laavis\_AAK94667.1\_cryptochro  
MEGKPSVSSVHWFRKGLRLHDNPALLAALRGANSVRCVYIILDPWFAASSSGGVNRWRFLQSLLEDLSSSLRKL  
NSRLFVVRGQPADVFPKLFKEWGSRLTFEYDSEFPFKERDAVIMKLAKEAGVEVIVENSHTLYDLDRVIELN  
GHSPPLTYKRQAIISRMELPRRPAPSVTRQOMEACRAEIKRNHDETYGVPSLEELGFHSENKGHAIWPGGET  
EALARLDRHLERKAWVANERPRMSANSLLASPTGLSPYLRFGCLSCRLFYRLQELYQKVKKNSPPLSLYG  
QLLWREFFYTAATNNPKFDQMEGNPICVQIPWDKNPKALAKWTEGKTGFPWIDAIMTQLRQEGWIHHLARHAV  
ACFLTTRGDLWNSWECGVKVFDELLLDADFSVNAGSWMWLSCSAFFQQFFHCYCPVGFGRRTPSGDYVKRYLP  
VLKAFPSRYIYEPWSAPESVQKEAKCIIGIDYKPIVNHAEASRMNIERMKQTYQQLSHYRGLCILASVPSCV  
EDLGGPVTDSSHNPAEAPKQSLCNADSPKRKLEGSEEAHVKVRVRSVPVMRRPENDF  
>Xenopus\_laavis\_XP\_018100774.1

MPHRTIHI FRKGLRLHDNPTLVAALETS DIIYPVYILDKNFMTSSSVIGSKRWNFLQSI EDLHCNLQKLN SC  
LFVIQGDYQSVLREHVQKWHITQVTFDLEIEPYKGMDERIRAMGQELGFDVVSKVAHTLYDVKSILALNYGK  
PPLTYKNFLRVL SVLGDPDKPARQITLED FIKCTTPTEFAAE EYYRIPKPEDLGICRDCAPNWKGGESEALCR  
LEQHLEKQGWVANFQKPQTPVNSLLPSTTGLSPYFSFGCL SARV FYHRLSNIYAQSKNHS LPPVSLQGQLLWR  
EFFYTAASSTPNFTHMVGNPICLQIEWYKNEEQ LQKWREGKTGFPWIDAIMAQLHEEGWIIHHLARHAVACFLT  
RGDLWISWEEGMKVFEELLLDADYSINAGNMMWLSASAFFHHYTRIFCPVRFGRRTDPEGNYIRKYLPVLKNF  
PAKYIYAPWTAPEEIQKQSGCLIGKDYPLPMVDHTTASEHNLQLMRLVREAQQKTAQLTTDIADDPMELN LKH  
PFKTDKESVLENKVRRRCLEETAGEDGNRQSDLVQSLDPCEVKVC

>Xenopus\_lae\_XP\_018113364.1\_photolyase

MDLEAVERAHINDIVRQLETGIVQTDEF LCLVL SVLGNRRTFWHLPAIIQSLREKEPAMYRELMDLHAHYFRK  
EPTDLETDL ELAIALSMHEQNQLTDTASSEM SPTAKISFADAAKSSCYSHKYSEKTSSSKTEIDKLKHNVAA M  
HLSQETNRCQAIRQEKTLSSCYNGQPEPEDCVLKSVDCEEVFHVEASVPRESKAKQSRRRRKKTKSAPS GGLV  
AMKPVLLWFRRDLRLHDNPALVSALEHGVPVPIPVFLWCINEETGQNFTLATGGATKYWLH HALL ELNQS LIQK  
FGSHVIFRVAQSCEKELVSLVHETGAGTVIVNAVYEPWLKERDDFISENLQKNGVEFKKHHSYCLYEPGSIST  
EGVGLRGIGSVSHFMSCKRNQSAPIGIPLDAPMILPTPCKWPDSDDDLDMKMLAKMPSRKDGT LIDWAMTIRE  
SWDFSEDGAYKCLSNFLEDGVKHYEKESGRADKPYTSHISPYLHFGQISPRTLHEAYFTKKNVPKFLRKLAW  
RDLAYWLLLLFPDMPSEPVRPAYKSQRWSSDLNHLRAWQKGLTGYPLVDAAMRELWLTGWMCNYSRHVVASFL  
VAYLHIHWHVHG YRWFQDTLLDADVAINAMMWQNGGMSGLDHWNFVMHPVDSALTCDPYGSYVRKWCPELAGLP  
DEYIHKPWKCAPSQLRRAGVILGQNYPHRIVLDLEERREQSLKDVVEVRKKHLEYLDEVSGSDMIPIDQLLA  
LTLGRPNGDDEVVRNRTSSFLLPVITRKEFKYKTLQPEAKDNPYSTVLKGYVSRKRDETIAYMNEKHFTASTI  
HEGAQRHERTERTSRLMEGLPAPSEPKNKSRRTPRKDPFSIIPPSYLHLAN

>Xiphias\_glad\_XP\_039979368.1

FFFFSCALHQLRKRCSPPLSLFGQLLWREFFYTAATNNPNFDRMEGNPICVQIPWDQNPEALAKWAEGR TGFP  
WIDAIMTQLRHEGWIIHHLARHAVACFLTRGDLWISWESGMKVFEELLLDADWSVNAGSWMWLSCSAFFQ QFFH  
CYCPVGFGRRTPSGDYIRRYIPILKDYPNRYIYEPWNAPEPVQKAANCVVGVDPYKPMINHAEGSRLNIERM  
KQVYQQLSHYRGLS

>Xiphias\_glad\_XP\_039982721.1

MSTSRTIICLLRNDLRLHDNELFHWAQRNAEYIVPLYCFDPRHYVGTYNYNLPKTGPFRLRFLLESVRDLRNT  
LLNKGSNLVVRGKPEDVVAELIKQLGSVSTVAFHEEVTSEDLNVEKKVKDVC AQMKVKVHTCWGSTLYHRDD  
LPFHHSRLPDVYTQFRKAVETQSRVRPVFPTPEQLKPLPPGLEEGALPTAEDLQQTEPLTDPRS AFFPCSGGE  
SQALARLRHYFWETDAVATYKETRNGLIGVDYSTKFAPWLAMGCISPRYIYHQIKQYERERTANQSTYWVIFE  
LMWRDYFKFVGVKYGSRLFQVKGLQDKSVPWKMDMKLFNAWKEGRTGVPFVDANMRELAMTGFM SNRGRQ NVA  
SFLTKDLGLDWRMGAEFESLLIDHDVCSNYGNWLYSAGIGNDPREN RKFNMIKQGLDYDNNGDYVRQWVPEL  
QGIRGADVHTPWTLSTAALSHAHVSLGETYPTPIVIAPEWSRHINTKSSGTGPSRGGKGPSHTSKQHRDRGI  
DFYFSKGKNL

>Xiphias\_glad\_XP\_039988261.1

MVVNTIHWFRKGLRLHDNP SLRDSIREADTLRCIYILDPWFAGSSNVGINRWRFL LHCL EDLDASLRKLNSRL  
FVIRGQPTDVFPRLFKEWQITRLSYEYDSEFPFGKERDAAIQLLANEASVEVMVRISHTLYDLDKI IELNGSQP  
PLTYKRFQALINRMDAVELPAETITSEVIKKCATPIGEDHDDKFGVPSLEELGFETEGLT TAVWPGGETEALM  
RLERHLERKAWVANFERPRMNANSLASPTGLSPYLRFGCLSCRLFYFKLTDLYRKVKRNSTPPLSLY GQLLW  
REFFYTATNNPCFDKMEGNPMC VQIPWDRNPEALAKWAEGR TGFPWIDAIMTQLRQEGWIIHHLARHAVACFL  
TRGDLWISWEEGMKVFEELLLDADWSVNAGSWMWLSCSSFFQ QFFHCYCPVGFGRRTPNGDYIRRYLPVLRG  
FPAKYIYDPWNAPEEVQKAAKCIIGVHYPKPMVNHA EASRINIERMKQIYQQLSCYRGLGLLATVPANPNSGL  
SGSNVAGVNKGTSQVPGGSSEELSVQEGTSRTERGHSTQKRREEAPSASSSKSWRQSK

>Xiphias\_glad\_XP\_039988503.1

MACMAPSAADAEDSKALVRRLREVLVGREDPEGFFAMCVSVLGHQETR SRFLSLIRPLSTANSSLHTDLTSI  
YREYFSKTEDDELELALALSVLEIKDHQLSSPSQESLLQQLGDRPNQSSSVQLTSASQPQGGSHTRLSDLASG  
RKYTHSAQTGPWGKVCPPQTRET ELQKGTHVVKCNKETPGTSQTVSVSRPSASLSKQETVIEGDQMI EEGDL  
NQSERARRSKNRRQRRKGGGQQVVGLPRSPSAPPPVLLWLRDLRLCDNPAVISSELVGAPVIPVFIWSP EEE  
EGPGITVAVGGACKYWLHQALSCFCSLERIGSHLVFLKANGEGNGVGS SLRTLKELIKETGTRTVMANALYE  
PWLKERDDAVVSALQKDGV ECFRMFHSNCLRDYPYSVSTEGVGLRGIGSVSHFMSCCRQNP GSALGVPLDSPVSL  
PTPAHWPPQGVSLDTLGLARMPRRKDGT TIDWAANIRKSWDFSEEGAQAQLEAFLHDGVYRYEKESGRADSPNT  
SSLSPYLHFGQLSPRWLLWDAKGARCRPPKFQRKLAWRDLAYWQLTLFPDLPWESLRPPYKALRWSSDRGHLK  
AWQRGQTGYPLVDAAMRQLWLTGWMNNYMRHVVASFLIAYLHLPWQEGYRWFQDTLVDADVAIDAMMWQNGGM  
CGLDHWNFVMHPVDAAMTCDPYGSYVRKWCPELADLPDEL IHKPWKCPASMLRRAGLVFGQTYPDRIITDLEE  
RRSQSLQDVALVRKEFGQYVDKRTGCDLVPLPPRLVSEALGLSHRNGGVVTEGKQFLLPVITRMEFKHQLEDP  
DADAASNPNYAVLKGYSRKRDETI AFLNERDFTASVMYEGAQRKERLES DYRRMEGLPRPPAPRGRARRTPT  
AKDRFSIVPGGAVTSLR

>Xiphias\_glad\_XP\_039999756.1

MLRGIRRRRLKLVLVHSDRWPSSILSRLPESFTSETIMSDKKRKAASAPAGKEPNAKQQKLGPMAEKEERAG  
GWLQHLVKQQRSEKKDMKFNKKRLRFISDAEKIKQGSEGVLYWMSRDHRVQDNWALIQARLAAKENLPLHIC  
VCLVVPKSELSTLRHYSFMLKGLKEVAKECKALDIQFHLLDGSAGEVLPGFVSDRSLGAVVTDFSPLREPLGW  
LEDVKKRLPESIPLIQVDAHNIIVPCWVASPKLEYSARTIRGKITNLLPEFLTDPLVEKHYPYTATRTAKPIDW  
DKILASLEVDRAVGEPEWAKPGTMAGMAMLESFIDVRLKLFGTQRNDPNAAALSQSLSPWIRFGHVSAQRMALQ  
VQRSGKNASQSISSFIEELVVRRELTDNFCFYNNKYDSVEGAYEWAQKTLKDHAQKDRPYLYTRQQLEKAKTH  
DKLWNAAQYQMVTEGKMHGFLRMYWAKKILEWTSPEEALSIALYLNDRYELDGQDPNGFVGCMWSICGIHDQ  
GWAERPVGKIRYMNYKGCTRKFDVPRFERKYCPKNL

>Xiphias\_glad\_\_XP\_040011325.1

MAHTCIHWFRKGLRLHDNPALVSALRDCKHLYPVFILDPHLQSDTHVGVNRWRFLVGALKDLDCLSRKLNSRL  
FVVRGKPEDVFPELFNKWKVTKLTYEHDTEPYSLSRDKKVTALAKEHGVVYKISHTLYDIDRIIEENNGKA  
PLTYNRMQAIVKTLGPPKKPLPAPTMEKMDVKTCPSESHEKKYGIPALEELCQDTAAVGEEFPFGGEQEALR  
RLEEHRMRRDWCRFEKPPQTPPNSLSPSTTVLSPYVTFGCLSARTFWWKLTEVYQGGKHSDDPPVSLHGQLLWR  
EFFYTASVGIPNFKMEGNPVCTQVDWDTNPDYLAARWREARTGFPFIDAIMTQLRQEGWIHHLARHAVACFLT  
RGDLWISWEKGQKVFEELLLDGDWALNAGNWQWLSASAFFHQYFRVYSPVAFGKKTDKNGDYIKKYLPLVKKF  
PAEYIYEPWKAAPRSVQQAAGCIVGKDYPRPIVQHEVISKKNIQRMKLAYAKRSPDPTESSPKKQGVKRKASSV  
VDMLKKKERRE

>Xiphophorus\_macu\_\_XP\_005795951.1

MVVNSVHWFRKGLRLHDNPALQEALSGADTVRCVYVLDPWFAAGANVGINRWRFLLESLEDLDNSLKKLNSRL  
FVVRGQPTVEFPRLFKEWNVTRLTFEYDPEPYGKERDGAIIKMAQEFVETVVRNSHTLYNLDRIDEMNNNNP  
PLTFKRQFTIVSRLELPRRPLSSVSQQQMNQCLGKISDNHDQLYSIPSLLEELGFRTEGLPPAVWRGGESEALD  
RLSRYLDKNVWVANTRVKTCSLYASPTGLSPYLRFGCLSCRMLYNNLREIYMKLCKRSSPPLSLYGQLLWREF  
FYTAATNNPNFDRMEGNPICVQIPWDQNPALAKWAEGRTGFPWIDAIMTQLRQEGWIHHRARHAVACFLTRG  
DLWISWESGMKVFEELLLDADWSVNGGSWMWLSCSAFFQQFFHCYCPVGFGRRTDPSGDYIRRYIPIPKDFPN  
RYIYEPWNAPELQKAANCVVGVDYPKPMINHAEGSRLNIERMKQVYQQLSHYRGLSLLASVPTIQEEAEPPM  
TDESQTSSGPDSPPRVLADMEAAVCLMAPDSSTSAPDQDNVSLHRVFDHCTSSGWPSPPASSPPQSPAPRSK  
PGSPSSPCPSPSASPSSLPFRKGVAKGRRSQRRRERPSCPMAKEEDEEERMQEEVDEERMEEETAAAAQQ

>Xiphophorus\_macu\_\_XP\_005797880.1

MSASRTVICLLRNDLRLHDNEVLHWAQRNAERIVPLYCFDPRHYVGTYNFNLPKTGPFRLRFLLESVRDLRNT  
LLSKGSNLVVRKGKPEEVVADLIKQLGSVSSVAFHEEVASEELNVEKKVKEVCAQLNVKVHTCWGSTLFHRED  
LPFHHISRLPDVYTEFRKAVESQSRVRPVLTPERLNLPLGLEGAIPATAEDLQQTPEVTDPRSAPFCTGGE  
SSALARLKHYFWDTDVATYKETRNGLIGVDYSTKFSFWLALGCISPRYIYHQIKKYERERTANQSTYWVIFE  
LLWRDYFKFVGKIKYGNKMFQVKGLQGSVPWKMDTKLFDWKEGRTGVFPVDANMRELALTGFMSNRGRQNV  
SFLTKDLGLDWRGAWEFEYLLIDHDVCSNYGNWLYSAGIGNDPRENKFNMIKQALDYDNNGEYVRRWVPEL  
GTIRGADIHTPNWLSAALSHSGVSLGETYPNPVTAPEWSRHFSSKKPGGAGPSPRKKGPSHTPKQHRDKGI  
DFYFSRSKNL

>Xiphophorus\_macu\_\_XP\_005802444.1

MSEKKRKAPTAAGGKEPSAKQPKLEKAKEAAGWLQSLVKRQREDTKDTKFNEKRQRFLLTDTEKMKQGSEGVLY  
WMQRDQVRVQDNWALIRAQQALAAKEELPLHVCFLVVPKSELSTLRHYAFLKGLQEVATDCKRLNVQFHLLRG  
APGEVLPGFVSDRGLGAVVTDFSPLREPQQWLNVDVKKLSKDIPLIQVDAHNIIVPCWVASPKLEYAARTIRGK  
ITKLLPEFLTDPLVEKHQHTATRTAKPVDWEQTLASLDVDRTVGEPQWAKPGSEAGMAMLESFIDVRLKLFA  
TQRNDPNTAALSQSLSPWIRFGQLSAQRVALQVRRCGKNASESVAAFIEELVVRRELTDNFCFYNEKYDKVEGA  
YEWAKTTLKDHAQKDRDNIYTREQLEKAQTHDKLWNGAQYQMVAEKMHGFLRMYWAKKILEWTRSPPEALS  
IALYLNDRYELDGQDPNGFVGCMWSICGIHDQGWAERPVGKIRYMNYKGCLRKFNVAFERKYDPKKA

>Xiphophorus\_macu\_\_XP\_005815705.1

MKNSDSMGVNTIHWFRKGLRLHDNPALRDSIRGDTLRCIYILDPWFAGSSSVGINRWRFLHCLLEDLDASLR  
KLNSRLFVIRGQPTDVFPRLFREWNIRLSYEYDSEPFGERDAAIQKLANEAGVEVTVRISHTLYNLDKIIE  
LNGGQPLTYKRFQAIINQMDAVELPAETITSKVIKNCTTPITHDHDKFGVPSLEELGFETEGLSAVWPFG  
ETEALMLRLERHLERKAWVANFERPRMNSNLLAAPTGLSPYLRFGCLSCRLFYFKLTDLYKKVKKNSTPPLSL  
YGQLLWREFFYTATNNPCFDKMEGNPVCLQIPWDRNPEALAKWAEGQTGYPWIDAIMTQLRQEGWIHHLARH  
AVACFLTRGDLWISWEEGMKVFEELLLDADWSVNAGSWMWLSCSSFFQFFHCYCPVGFGRRTDPSGDYIRRY  
LPVLRGFPKAYIYDPWNAPEVDQKAAKCIIGTNYPRPMVNHAEASRVNIERMKQIYQQLSCYKGLGLLATVPA  
NPNNGANGSNVGGANAYSAVRSFESPLLQEGTSQTVGRRQSSQKRRHEETEPECSEFSKWKHSK

>Xiphophorus\_macu\_\_XP\_023182506.1

MPHSAAGGQAAVRQMLREVLVGREDEPGEFFAMCVSILGHQETRLQFLSIKPLSTANIRLHSVLSFIYQGYFS  
KMEDDELELALALSLLDMKDQQISTPNQMTPHPAVGGNASSVLCNSNAKTQGNSCTQQEDVPGREKSAFVAQS  
MSGSKENFRENQTYKSTHVEGVDNKSGLTSQALYVPDSSTSFSITNTASVSGQVMKKEDLSKKPRCSKNRRQR  
RKVAAQQIVGLKRSPSAPPPVLLWFRDRDLRLCDNPALIRCLELGAPVIPVFIWSPEEEEGSGVTLAMGGACKY  
WLHQALSCFCASLGRIGSHLIFLKASGDENKDGSSLHTLKTTLVKETGAQTVMANALYEPWLKERDDVVSALH  
KEGVECKMFHSYCLRDPFSVSTEGVGLRGIGSVSHFMNCCRQNPASIGVPLDPPVSLSPTRWPQGVPLDKL

GLARMPRRKDGTIIDWAENIRKSWDFSEDGAHARLEAFLHDGVYRYEKESGRADAPNTSCLSPYLHFGQLSPR  
WLLWDAKGARCRPPKFQKRLAWRDLAYWQLTLFPDLPWESLRPPYKALRWSTDCRHLKAWQKGKTGYPLVDAA  
MRQLWLTGWMNNYMRHVVASFLIAYLHLPWQEGYRWFQDTLMDADVAIDAMMWQNGGMCGLDHWNFVMHPVDA  
AMTCDPYGYSYVRKWCPELADLPDELIIHKPWKCPASILRRTGVVFGQTYPERIVTNLEEQRSKSLQDVALVRKQ  
FEQYVDKRSGCDLVPLPKRLVSEALGVSHWDGAVVTEGKQFLLPVITRMEFKHQLEDPDADAASNPNYAVLKG  
YVSRKRDETI AFLNETDFTASVMYEGAHRQERLERDYRRMEGLPPAPSNRGRARRTSTAKDKFSVVPGGAIAS  
RN

>Xiphophorus\_macu\_\_XP\_023187633.1

MAHVCIHWFRLRLHDNAALMAALKDCKELYPVFILDPYLHHTQVGINRQRFLIGALKDLDCSLRKLNSRLF  
VLRGKPEDVFPKLFNMWNVTKLTYEYDTEPYSLRDEKVASLAKEHGVVDVIYKISHTLYNIERII EENNGKPP  
LTYKRLQAI VQNLGPPKKPI PAPTLENMRDVKTPHSEKYEDKYRIPTLEELQLDSKFLGEELFPGGEQEALRR  
LDEHMKRTGWVCSFEKPQTSFNSLSPSTTVLSPYVTFGCLSARTFWWRLTEVYRGRKHSDDPPVSLHGQLLWRE  
FFYTCSVGIPNFKMNQNPVCTQVDWDTNQRNLAAWREARTGFPFIDAIMTQLRQEGWIHHLARHAVACFLTR  
GDLWISWEEGQKVFEEDLLLDGDWALNAGNWQWLSASAFFHQFFRVYSPIAFGKKTDKNGDYIKKYLPLLKKFP  
PQYIYEPWKAPRSVQQAAGCIVGKDYPHPIVQHEQISKKNIQRMKEAYAKRSSDNNESPIKKQGVKRKTPSVI  
DMLQKKIRKE

>Xylona\_hev\_XP\_018186447.1\_cry\_\_

MTSSRILIIYVLRDLRLADNPILHEVSRVLRSSQNASFTHLLPLYVFPAQQVEVSGFLSPGTTDSPYAEARSK  
VGGFWRTGHRVKFLAESVWDTKSSLEKVGSGLEIRVGVTSSEVIKDMLEAYKTL DGEVSAVWMT EEEGWEEKQ  
DEENVRTVVEAEGKEFQLWKDEKYFIDDI DLGSPRDIPFQDPKELPDVFTSYRKMVEPLREAPRKSVP PPSQL  
LPLPDSIPPQSSPFVQPSLENLIAALEKPLHNDDELEHPPKWPNGANSAPFPSSGGEKAGHERIKHLVTS GSM  
SAYKDTRNGLLEDGFSTKLAAWLALGCITARQVHEYLLFEFEDGSSALGSDAIGYNGENKGTAAVRFELLWRD  
YMRLCTRKFGARLFHIDGFRHGKSVPWKYVDGAERKNKRHSNSAVDAAEALQRFLEGRSGTGLIDASMRELY  
LTGYTSNRARQNVASFLAKHLRIDWRLGAEWYETQLVDYDVSSNWGNWQYNAGVGNDRGEGRVFNPIKQAFD  
YDPQGEYVKTWVPELRDVEDPLAVFQAWRLPVDQRKALGLEGVWVENPLKRIDFYVSKPSKSGSTFASGNRN  
RQQEGQGRNDLNDEANAAEEAQGTSRGSSNHRGRGRGWGRARGRGRGRSRGRGGGRGSGKHTTDETPRRKQNM  
GRMDNAATLEEAI A

>Xylona\_hev\_XP\_018189085.1\_cry-2

MTKPKPRVIYWFRTDLRLHDSPALKAALDLEPECLYPIWTWDPHYVYRARVGPNRWQFLLDCQSDLSASITKL  
NKKSKLFVIRESP TTLFPKLFKAWNISHLVFEKDTDAYARDRDN E VTEIAKKAGVQVITKVGR TLYDPDELVK  
QNHGKPTMSISQVIKAGEQIQIPRPI PAPASLPDPGDTSLNFKQDHPSSSEPDINAPQRNSSDQSYAHLAGPQ  
GDFSVP TYDELGLKPSTTPHHGGETAALAALDKIISNTKYTATFEKPSTAPTAFEPQSTTLLSPHLHFGSLSC  
REFYWRAQDVVDNFKQGTASHPPTSLTGQLLFRDMYFGAQ AALGHKFGQAYGNPSCRSVPWHLPSKV NEDTGL  
VVRDGGGGGGVEYSIDSSTAETWFQRWKYGCTGFPWIDALMRQLRQEGWIHHLGRHAVACFLTRGGCYVDWER  
GAAVFEEWLIDHEPACNIGNWQWLSCTAFYAQFYRCYSPISFPQKWDKDGA FVRKYVPELANFPAKYIYEPWK  
APIADQKAAGCLIKSIDEEGEDGELDLSPWKKEIVA EKHEANGA QNGDEKKEKESMNIYPKPMFDFPSRRTTC  
INALKNAYRVGLYGNQKVL DGTWRDLFPDEAEGPTSTADVEAMHDADAHGEFVHDAEGHEGLHEKDHS PVGR  
KRKEHGQGTLDGHVKR TKT

>Xylona\_hev\_XP\_018189979.1\_CDP\_photol

MPPSRTSNRKRQAGSKSASPEPPSKRRANGNSSPKKGSTQDDDDNNGYVLREFYPPEMS NKRCL EYAHDEITR  
PIEELQTAIEETA EARKNIKVKNSV VHWFKRDLRTQDNKSLALASEKAKDAGVPLIALFIVSPQDYQAHLTSS  
PRVDFELRTLQILKKDLAQLDIPLYVETVEKRKKVPSRVVELCNEWGASHVFCNIEYEVDEL RREAKLTRLCA  
EKGIEFS AVHDT CVVPPGELASQQGKQYAVYSPWFRAWIAHLHSNPDLLEKYDSPGKNSKDSREKFKNLFDSS  
IPDAPANKMLNDEEKKRFHSLWPAGEHEAHDRLDKFLNQKIGHYTETRNYP AANSTALLSVHFSSGTL SARTA  
VRQARDANTTKKLDGNGSGITGWISEVAWRDFYKHVLVHWPYICMNKPFKPEYANIEWSYSEDNFQKWCQGQT  
GYPIVDAAMHQLNHMGYMHNRCRMIVASF LSKHLLIDWRKGERYFMEHLIDGDFASNNGGWG FSSSTGVDPQP  
YFRIFNPLMQSERFDPEGEYIRKWLPELKDVEGKA IHAPYERGAEKIAAKNNYPKPMIEHKFGRDRALSKYKE  
GLGRDTA

>Zootermopsis\_nev\_XP\_021920747.1\_cry1-like

MMSEGA KH TVHWFRLRLHDNP SLREGLKCATTFRCVFILDPWFAGSSNVGINKWRFL LQCLEDLDQSLRR  
LNSRLFVIRGQPADALPKLFKEWDTTDLTFEEDPEPFGRV RDQ NIMAMCKELGITVMSRV SHTLYKLQNI EK  
NGGKAPLTYHQFQKVVASMGSPQAEPTINQKFIDSAYTPIAEDHDDKYGVPTLEELGFDTDGLLPVWQGE  
SEALARLERHLERKAWVASFGRPKMTPQSLLASQTGLSPYLRFGCLSTRLFYYQLTDLYKKIKKACPLSLHG  
QLLWREFFYCAATKNSNFDRMNGNPICLAKWANGQTGFPWIDAIMTQLREEGWIHHLARHAVACFLTRGDLWI  
SWEEGMKVFEELLLDADWSVNAGMWMWLSCSSFFQQFFHCYCPVRFGRKADPN GDYIRKYL PVLKNFPTRYIH  
EPWNAPEAVQKAACIIGKEYSLPMVNHAVASRTNIERMKQVYQQLSKYRGPGLLATVPTSQSQSCNTLNHLS  
VQKSLKTSPPSETKWETSPSDEIIGHSQVICDEELKNGIQIHRYKSHRRDESE

>Zootoca\_vivipara\_XP\_034953412.1\_LOW\_QUALIT

MATAFPMGSGSRTSGGRDAHITGGCSVHWFRRLRLHDNPALQAAIREGGSVRCIYILDPWFAASSAVGINRW  
RFL LQSLEDLDNSLQKLNLSRLFVVRGQPTDXFPRLFKEWGVTHLTFEYDSEPF GKERDAAIVKLAKEAGVAVI

TENSHTLYDLDRIIELNGHKPPLTYKRFQAIISRMDLPKKPVATVTNQOMEICRTEIQENHDETYGVPSLEEL  
GFPTEGLAPAVWQGGETEALTRLDKHLERKAWVANYERPRMNANSLLASPTGLSPYLRFGCLSCRLFYRRLWE  
LYRKVKRNSTPPLSLYGQLLWREFFYTAATNNPQFDRMEGNPICIQIPWDRNPEALAKWAEKGTGFPWIDAIM  
TQLRQEGWIHHLARHAVACFLTTRGDLWISWESGVRVFDLLELLDADFSVNSGSGMWWLSCSAFFQQFFHCYCPVG  
FGRRTDPSGDFIRRYLPKLKGFPSRYIYEPWNAPEVQKAAKCVIGVDYPKPMVNHAEASRLNIERMKQIYQQ  
LSRYRGLCLLASVPSSMEDLSAPVTDSSASQGSCTMPRQSHCGQTSPKRKLNVEEHNEELYKRAKVMPAQIP  
KNLXQEIIVHDAVSKLHQ

>Zootoca\_vivipar\_XP\_034985269.1

MAALRTALCVLRNDLRYHDNEVLHWAHSNADFVIPLYCFDARHYAETHCYQFPKTGPYRLKFLLSVEDLRET  
LKKKGSNLVVRKGKPEDVICDLIAQLGSVAAVVFHEEATKEELDVEKALLQVCSEQGVVAQKFWGSTLYHRDD  
LPFKHISRLPDVYTQFRKDVESQVKVRPLLQMAAQLKPLPPGVEEGTIPKVEDFGMQDPLTDHRTAFPCSGGE  
TQALMRLQHYFWDNLVASYKETRNLGIGVDYSTKFAPWLALGCISPRYIYEQIRKYEKERTANQSTYWVLFE  
LVWRDYFRFVALKYGRRVFFVRGLQDKDVRWKKDKPLFDSWKEGKTGVPPVDANMRELAATGFMSNRGRQNV  
SFLTKDLGLDWRMGAEWFESELLVDYDVCSNYGNWLYSAGVGNPRENRKFNMIKQGLDYSNGDYVRLWVPEL  
QGIKGGDVHTPWALSTAALSQAGVSLGATYPLPVVMAREWSRHINQKPNSSQGPTRKGGKGPSYTPKQHKDRGV  
DFYFSRNKDLS

>Zootoca\_vivipar\_XP\_034988454.1

MSQKRRKRKPAESAEPKEEGAEEGAIFPDGLES GGRLASGAPPGAKKAAGEGGVSGGSATLAEGVKRARLNA  
APSVAEFKYNKKRVRLISQDPDLKEDAQGILYWMSSRDQRVQDNWAFLYAQRALAKQLPLHVCFLVPKFLEA  
TIRHFGFLIRGLKEVAEECKELSIPFHLLIGFAKDVLPFSVTTTHGIGGVVTDFAPLRVPMQWVQDVQERLPPD  
VPFVQVDAHNIVPCWVASDKQEYGARTIRRKIHDLAEFLTEFPVVRHPYPAEFQAEPVWDWACYASLQVDH  
SVKEVPWAQPGTAAGLAVLEEFIKERLKFFGTDRNNPNRAALSNLSPWFHFGQISVQRAILEVRKLRSRYKES  
AEAFIEEAVVRRELADNFCYYPNPYDKVEGAYDWAKTTLKLHAKDKRPHLYTLEQLEEGKTHDPLWNAALQMQ  
VHEGKMHGFLRMYWAKKILEWTTSPPEALKFSIYLNDRYELDGRDPNGYVVGQSWEEAGWLNHRVIGLQGAPRA  
NLVQPPADQDSTRPMSVPAHCRERWEECKSRDLFVLFFPLHQAACGLFVGSTTKAGQSGFLARSAT

>Zootoca\_vivipar\_XP\_034995129.1

MTHISIHWFRRKALRLHDNPALLAAMKDSAEVYPIFIFDPWFPKNMRVSVNRWRFLVESLRDLDES LKKLNSRL  
FVVRGSPVEAFPELFKKWKVTLTTFEVDTEPYARRRDAEVVRVAAEHGVQVVQKVSHTLYDTERII IENNGKA  
PLTYTRLQTVLASLGPPKRPVPAPSLNLKECSTSVKEDHDKEYGIPSLLEELGQDPKTAGPHLYPGGESEALA  
RLDLYMKRTSWVCNFKKPDTSNLSLTPSTTVLSPYVKFGCLSVRMFWWKLTEIYQGRKHS DPPVSLHGQLLWR  
EFFYTAGAGIPNFDKMEGNPVCVQVDWDDNKEHLKAWREGRTGYPFIDAIMTQLRTEGWIHHLARHAVACFLT  
RGDLWISWEEGQKVFEELLLDADWSLNAGNWQWLSASAFFHQFFRVYSPIAFGKKTDKNGEYIKKYL PFLKKF  
PSDYIYEPWKAPRSVQERAGCIIGKDYPKPIVAHEEVRKKNLERMKAAYARRSQSAAAEAQDERSKKGHRVWE  
DANQKRPEAPLKAEVRTKKMKIKST

>Zootoca\_viv\_XP\_034982807.1\_cry-1\_X1

MGVNAVHWFRRKGLRLHDNPALREVIQGADTVRCVYILD PWFAGSSNVGINRWRFL LQCLEDLDANLRKLNSRL  
FVIRGQPADVFPRLFKEWNITKLSIEYDSEFPFGKERDAAIKKLASEAGVEVIVRISHTLYDLDKI IELNGGQP  
PLTYKRFQTLISRMEPLEMPVETITVEVMSKCTTPVSDDHDEKYGVPSLDELGFDTDGLPSAVWPGGETEALT  
RLERHLERKAWVANFERPRMNANSLLASPTGLSPYLRFGCLSCRLFYFKLTDLYKKVKKNSSPPLSLYGQLLW  
REFFYTAATNNPRFDKMEGNPICVQIPWDRNPEALAKWAEGRGTGFPWIDAIMTQLRQEGWIHHLARHAVACFL  
TRGDLWISWEEGMKVFEELLLDADWSVNAGSGMWWLSCSSFFQQFFHCYCPVGFGRRTPNGDYIRRYLPVLRG  
FPAKYIYDPWNAPEGVQKVAKCVIGVNYPKPMVNHAEASRLNIERMKQIYQQLSRYRGLGLLASVPSNNGNG  
NSGLMGYSPGETLHASGSQMGTNEAHTGSVQTCTLGESHTGTSGIQQQAGYPQGS GILHYAHGEGQKTHLIQQ  
GRASLVAGVCTGKRPNPPEEETQSIGPKVQRQSSN
