# Supplementary material for: The Gain and Loss of Cryptochrome/Photolyase Family Members during Evolution
Source: MDPI journal article supplement (doi:10.3390/genes13091613), 2022-09-08

### Sequence Logo

2. *Crateromorpha* meyeri CAZ66368.1 cry

### 3. Aphrocallistes vas CAD24679.1 photolyase

4. Amphimedon que XP\_003386569.1 cry-2-like

Sequence Logo

1. Suberites dom CAZ66367.1 cry

2. Crateromorpha meyeri CAZ66368.1 cry

### 3. Aphrocallistes vas CAD24679.1 photolyase

4. Amphimedon que XP 003386569.1 cry-2-like

Sequence Logo

1. Suberites dom CAZ66367.1 cry

2. *Crateromorpha* meyeri CAZ66368.1 cry

3. Aphrocallistes vas CAD24679.1 photolyase

4. Amphimedon que XP\_003386569.1 cry-2-like

Sequence Logo

1. Suberites dom CAZ66367.1 cry

2. *Crateromorpha* meyeri CAZ66368.1 cry

### 3. Aphrocallistes vas CAD24679.1 photolyase

4. Amphimedon que XP\_003386569.1 cry-2-like

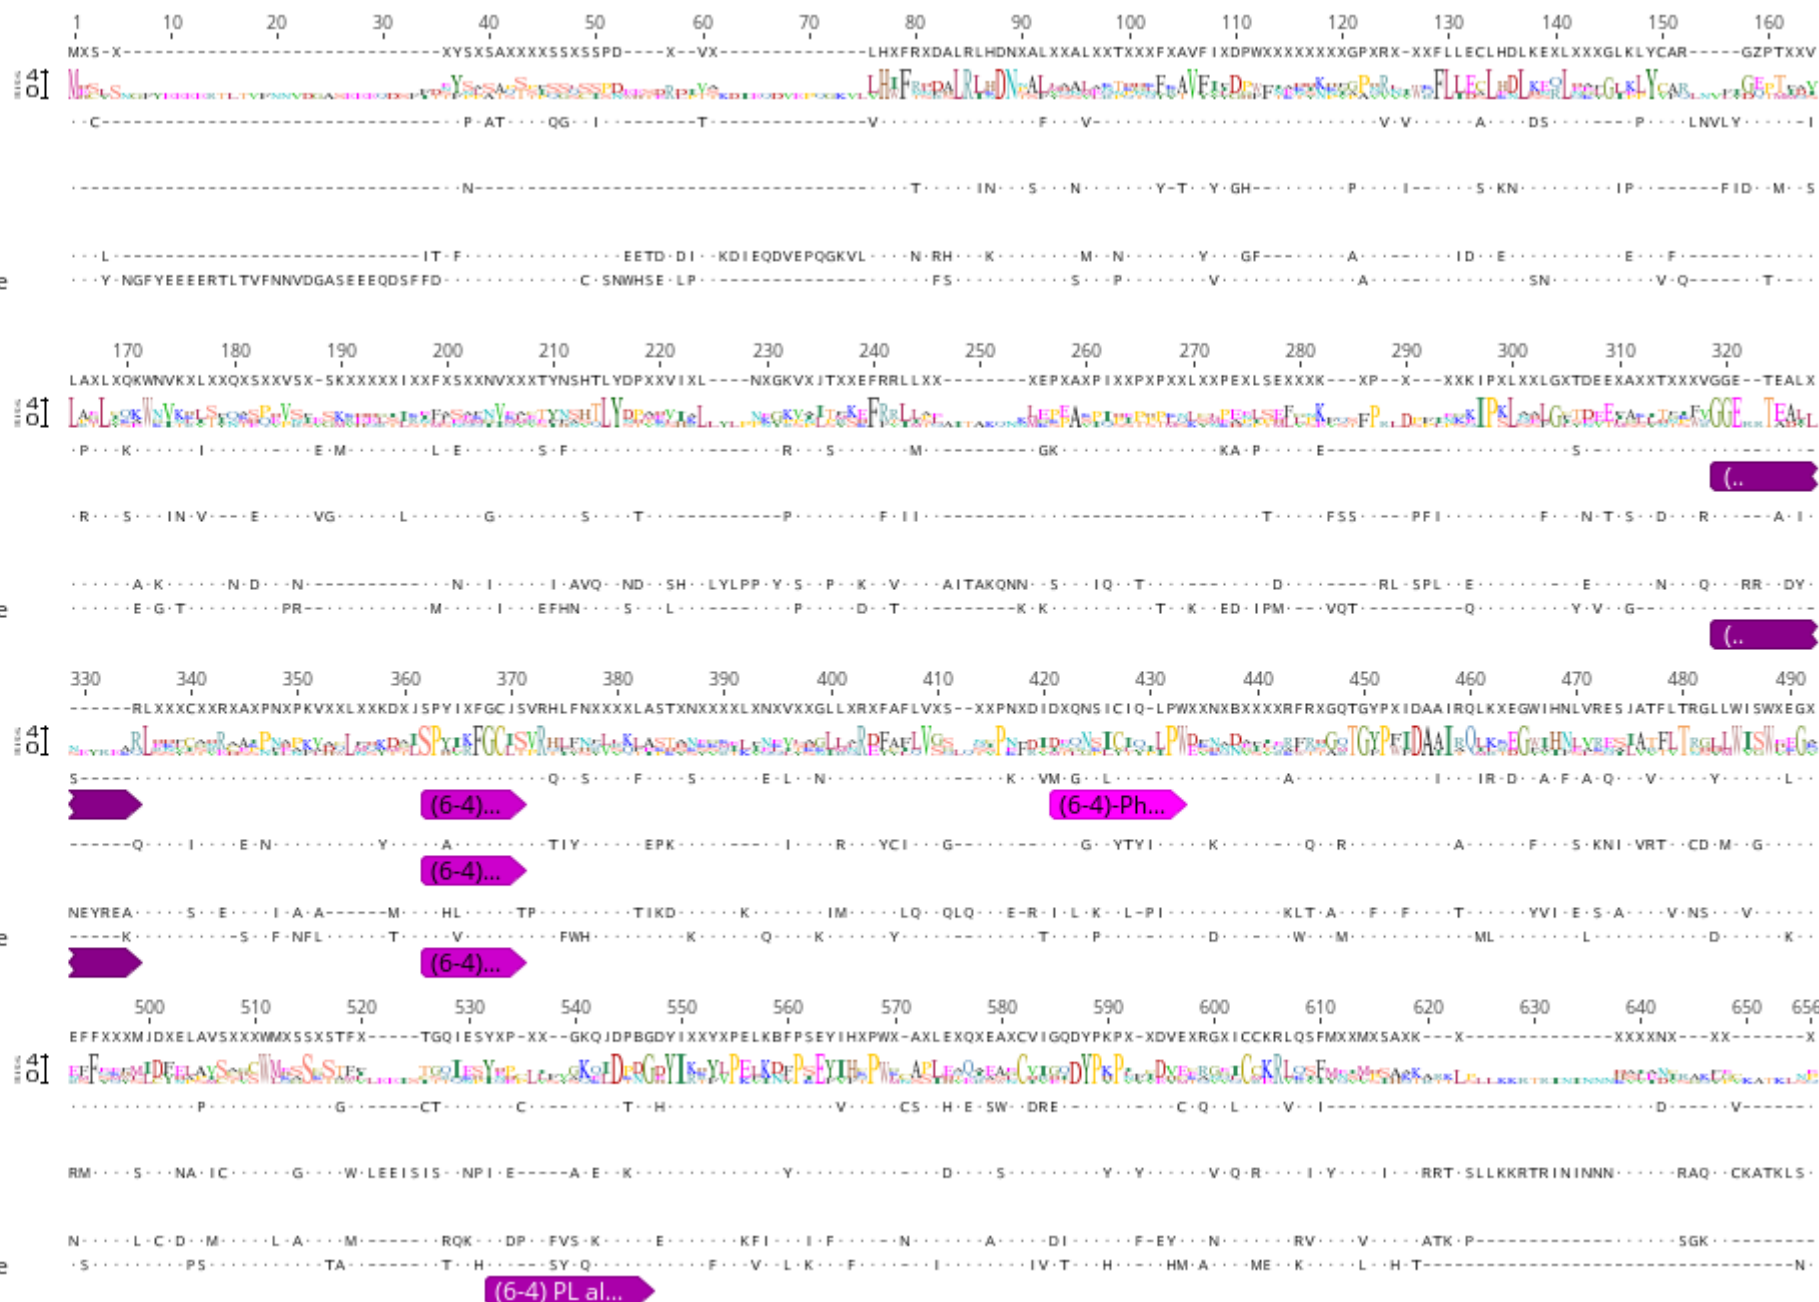

Supplement: s1 [file s1]
