# Supplementary figures and images for: The Gain and Loss of Cryptochrome/Photolyase Family Members during Evolution
Source: MDPI journal article supplement (doi:10.3390/genes13091613), 2022-09-08

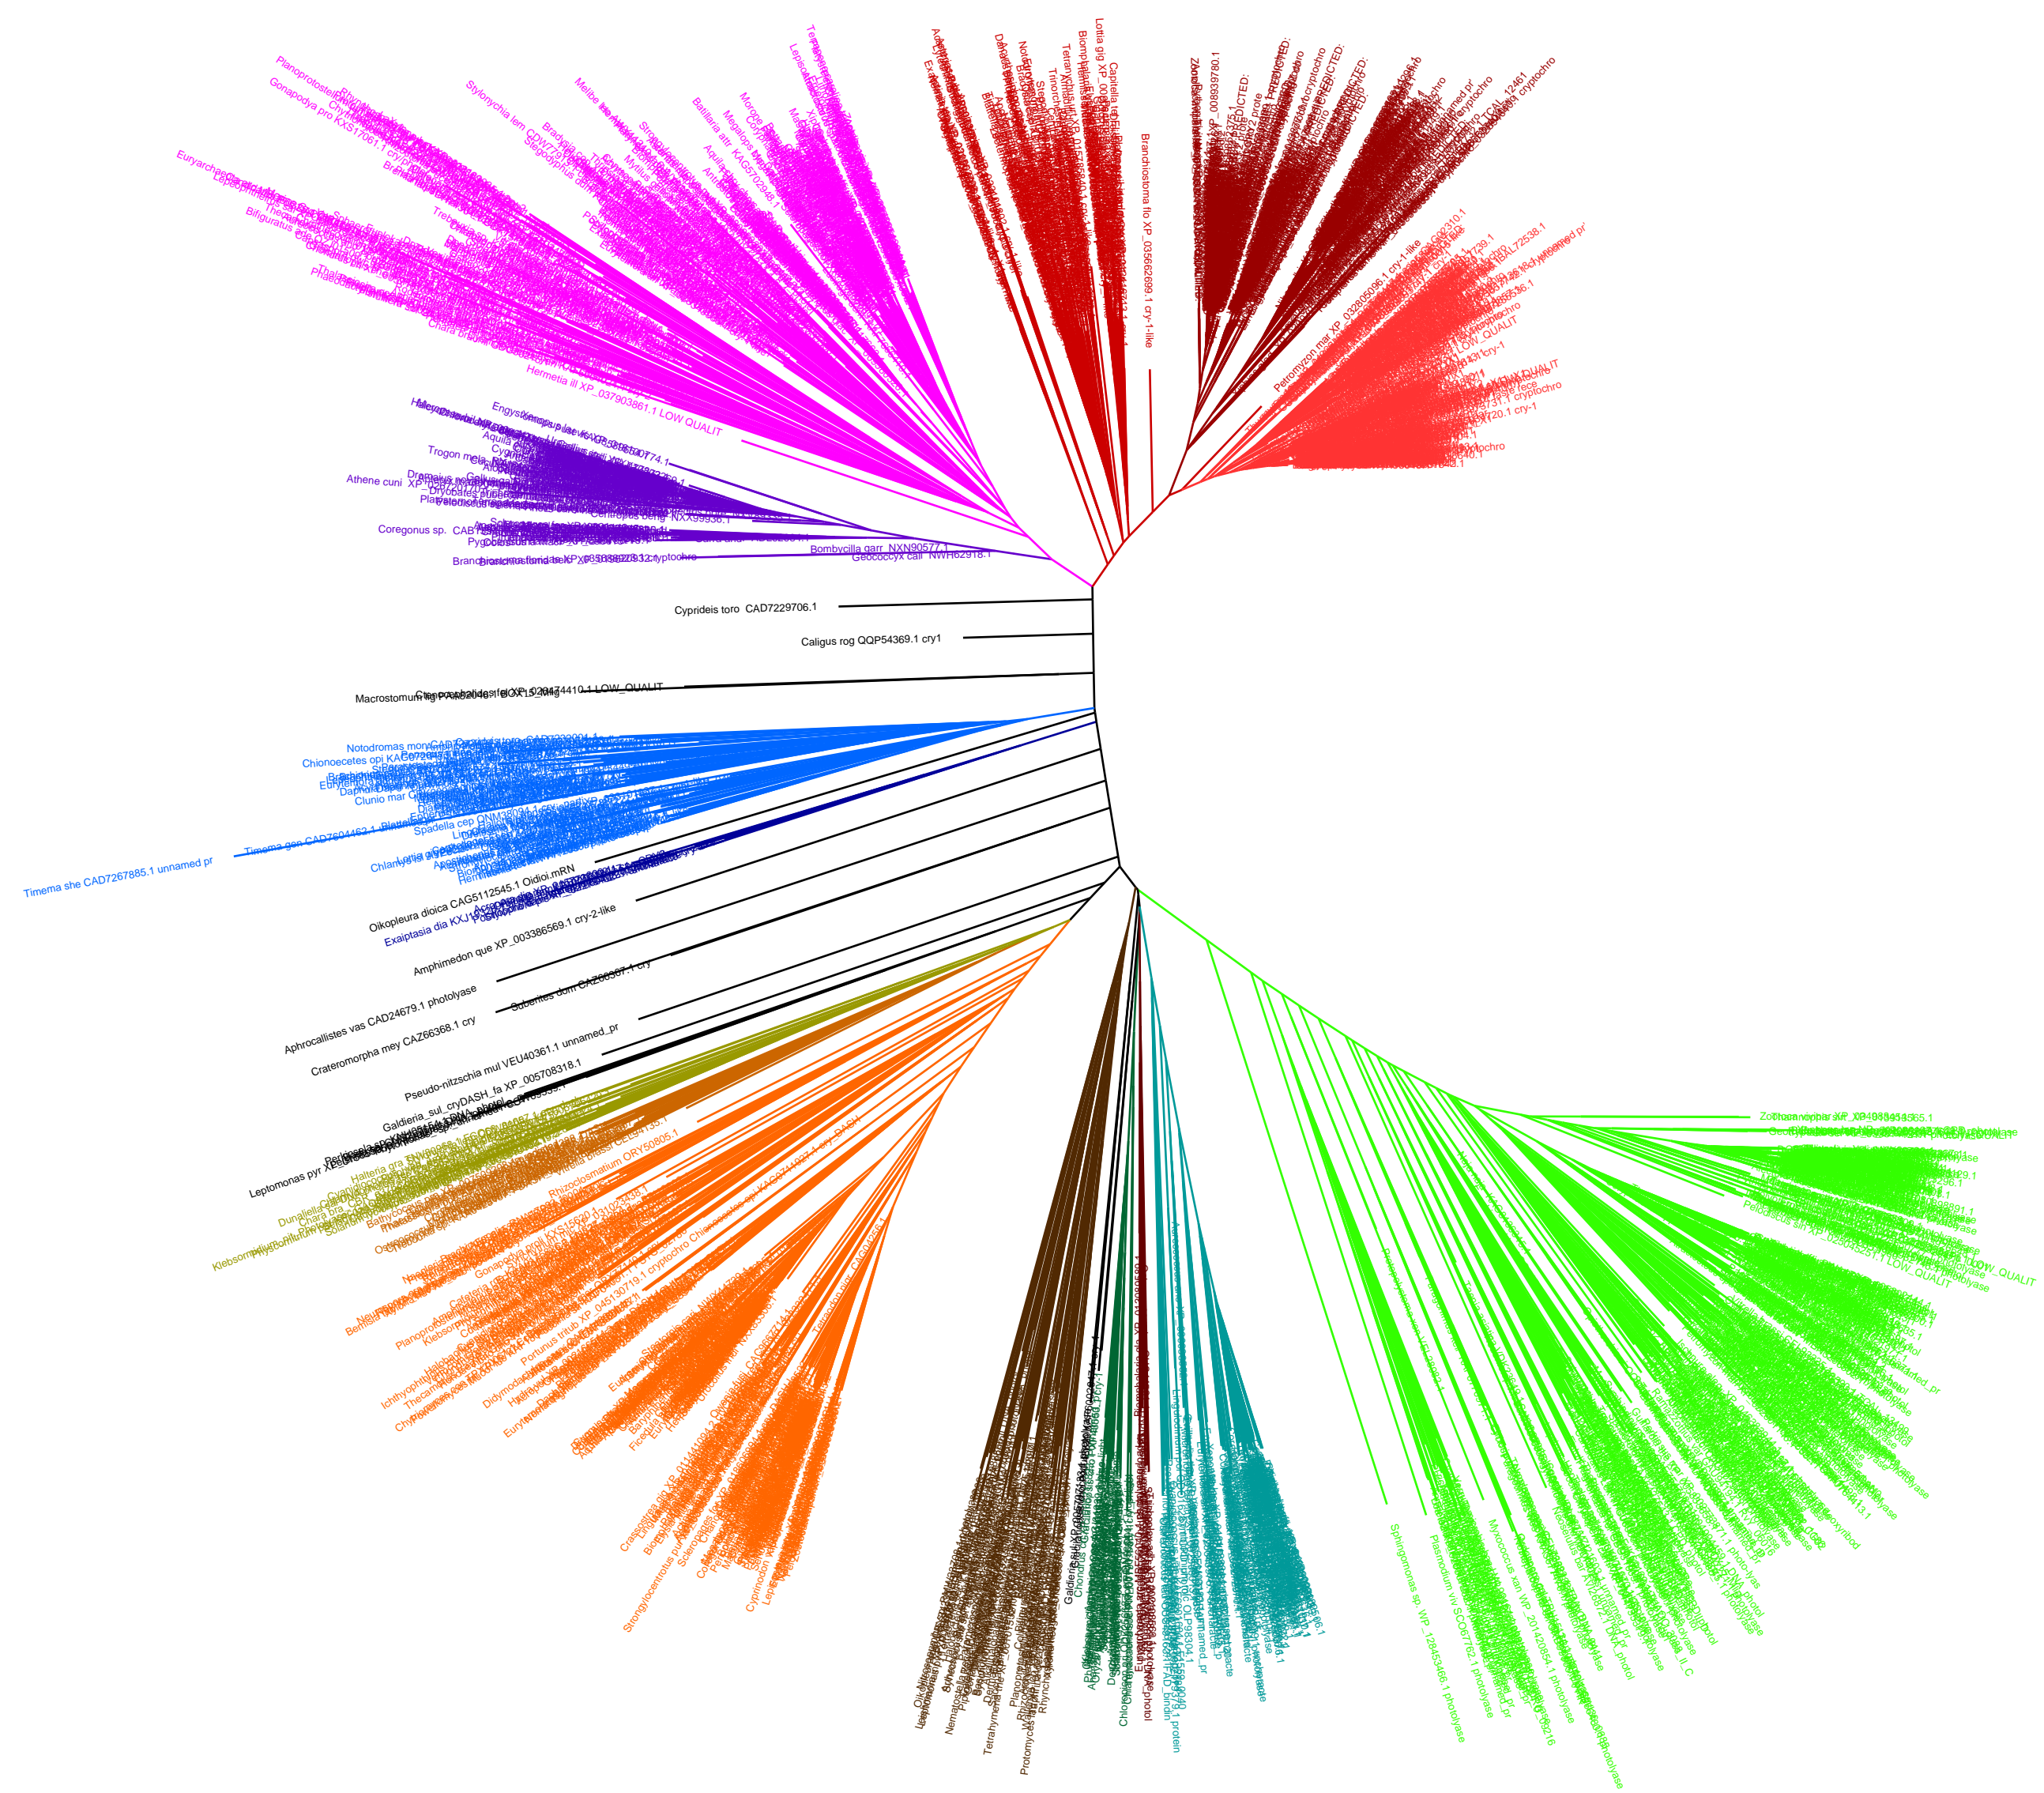

Supplement: s1 [file s1]
